# Supplementary material for: Structural features of heteromeric channels composed of CALHM2 and CALHM4 paralogs
Source: eLife. 2024 Jun 18;13:RP96138. doi: 10.7554/eLife.96138 (PMC11186629; doi:10.7554/eLife.96138)
Supplement: Figure 1—figure supplement 1—source data 1. [file elife-96138-fig1-figsupp1-data1.xlsx]

## Sheet: supplement figure 1 E
	Cm [pF]	I [pA]	Density pA/pF
Mock no Ca2+	16	53.7	3.35625
Mock no Ca2+	15	59.2	3.94667
Mock no Ca2+	23	151.36	6.58087
CALHM1 no Ca2+	19	933.23	49.1174
CALHM1 no Ca2+	17.3	1612.55	93.211
CALHM1 no Ca2+	17.5	398.56	22.7749
CALHM1 no Ca2+	13.5	895.38	66.3244
CALHM2 no Ca2+	13.5	87.89	6.51037
CALHM2 no Ca2+	24.6	152.59	6.20285
CALHM4 no Ca2+	16	183.1	11.4437
CALHM4 no Ca2+	18	126.34	7.01889
CALHM1/3 no Ca2+	14.4	2314.45	160.726
CALHM1/3 no Ca2+	19.5	2094.73	107.422
CALHM2/4 no Ca2+	21	57.37	2.7319
CALHM2/4 no Ca2+	20	91.55	4.5775

## Sheet: CALHM24 #1
Signals=	IN 0	10_Vm	IN 0	10_Vm	IN 0	10_Vm	IN 0	10_Vm	IN 0	10_Vm	IN 0	10_Vm	IN 0	10_Vm	IN 0	10_Vm	IN 0	10_Vm	IN 0	10_Vm	IN 0	10_Vm	IN 0	10_Vm	IN 0	10_Vm	IN 0	10_Vm	IN 0	10_Vm	IN 0	10_Vm	IN 0	10_Vm	IN 0	10_Vm	IN 0	10_Vm
Time (s)	Trace #1 (pA)	Trace #1 (mV)	Trace #2 (pA)	Trace #2 (mV)	Trace #3 (pA)	Trace #3 (mV)	Trace #4 (pA)	Trace #4 (mV)	Trace #5 (pA)	Trace #5 (mV)	Trace #6 (pA)	Trace #6 (mV)	Trace #7 (pA)	Trace #7 (mV)	Trace #8 (pA)	Trace #8 (mV)	Trace #9 (pA)	Trace #9 (mV)	Trace #10 (pA)	Trace #10 (mV)	Trace #11 (pA)	Trace #11 (mV)	Trace #12 (pA)	Trace #12 (mV)	Trace #13 (pA)	Trace #13 (mV)	Trace #14 (pA)	Trace #14 (mV)	Trace #15 (pA)	Trace #15 (mV)	Trace #16 (pA)	Trace #16 (mV)	Trace #17 (pA)	Trace #17 (mV)	Trace #18 (pA)	Trace #18 (mV)	Trace #19 (pA)	Trace #19 (mV)
0	-9.76563	-40.1001	-16.4795	-40.1001	-4.88281	-40.1001	-14.0381	-40.1001	-27.4658	-40.1001	-29.9072	-40.1001	-43.335	-40.1306	-48.2178	-40.1001	-39.6729	-40.1001	-95.8252	-40.1306	-45.166	-40.1001	-34.79	-40.1306	-29.9072	-40.0696	-57.373	-40.1306	-37.8418	-40.1001	-45.166	-40.1001	-43.335	-40.1001	-39.0625	-40.1001	-59.2041	-40.1306
0.0005	-17.7002	-40.0696	-13.4277	-40.1306	0.610352	-40.1001	-15.8691	-40.1001	-36.0107	-40.1001	-39.6729	-40.1001	-39.0625	-40.1001	-61.6455	-40.0696	-52.4902	-40.1001	-100.708	-40.1001	-36.6211	-40.1001	-51.2695	-40.1001	-32.959	-40.1001	-48.8281	-40.1001	-28.0762	-40.0696	-31.7383	-40.1306	-40.2832	-40.1001	-45.7764	-40.1001	-75.6836	-40.1001
0.001	-23.8037	-40.1001	-17.0898	-40.1306	-14.6484	-40.1001	-12.8174	-40.0696	-25.0244	-40.1306	-33.5693	-40.1306	-43.335	-40.1001	-84.2285	-40.1001	-68.3594	-40.1001	-106.201	-40.0696	-32.959	-40.1001	-49.4385	-40.1001	-25.6348	-40.1001	-57.373	-40.1001	-28.6865	-40.1001	-27.4658	-40.0696	-46.3867	-40.0696	-48.2178	-40.1306	-53.7109	-40.1001
0.0015	-21.9727	-40.1001	-20.752	-40.1001	-26.2451	-40.1001	-12.8174	-40.1001	-21.9727	-40.1306	-39.0625	-40.1001	-51.8799	-40.0696	-60.4248	-40.1001	-56.1523	-40.1001	-99.4873	-40.1001	-42.1143	-40.1001	-46.3867	-40.1001	-29.9072	-40.1001	-42.7246	-40.1001	-36.0107	-40.1001	-30.5176	-40.1001	-48.8281	-40.1001	-42.7246	-40.0696	-54.9316	-40.0696
0.002	-10.9863	-40.1001	-20.752	-40.1001	-28.6865	-40.1001	-16.4795	-40.0696	-17.0898	-40.0696	-40.2832	-40.1001	-31.1279	-40.1001	-39.6729	-40.1306	-40.8936	-40.1001	-98.2666	-40.0696	-50.6592	-40.0696	-38.4521	-40.1001	-25.0244	-40.0696	-46.3867	-40.1001	-30.5176	-40.1001	-45.166	-40.1306	-46.3867	-40.0696	-50.6592	-40.1001	-50.6592	-40.1001
0.0025	-24.4141	-40.1001	-12.207	-40.1001	-29.2969	-40.1001	-9.15527	-40.1001	-12.8174	-40.1001	-37.8418	-40.1001	-42.1143	-40.1001	-53.7109	-40.1306	-37.8418	-40.1001	-111.694	-40.1001	-40.8936	-40.1001	-37.2314	-40.1001	-40.2832	-40.0696	-31.7383	-40.1001	-48.2178	-40.1001	-38.4521	-40.1001	-58.5938	-40.1001	-45.7764	-40.0696	-60.4248	-40.1001
0.003	-31.1279	-40.0696	-14.6484	-40.1001	-18.9209	-40.1001	-6.71387	-40.1306	-17.7002	-40.1001	-14.6484	-40.1001	-39.0625	-40.1611	-57.373	-40.1306	-45.7764	-40.1001	-113.525	-40.1306	-36.0107	-40.1306	-41.5039	-40.0696	-32.3486	-40.1001	-36.0107	-40.1001	-50.6592	-40.1001	-37.8418	-40.1306	-46.3867	-40.1001	-39.6729	-40.1001	-50.0488	-40.1306
0.0035	-12.207	-40.0696	-3.66211	-40.1001	-32.3486	-40.1001	-3.66211	-40.1001	-31.7383	-40.1001	-39.6729	-40.0696	-59.8145	-40.1001	-60.4248	-40.1001	-67.1387	-40.1001	-119.019	-40.1001	-46.9971	-40.0696	-37.2314	-40.1306	-46.3867	-40.1001	-48.8281	-40.1001	-30.5176	-40.0696	-33.5693	-40.1001	-50.0488	-40.1001	-50.0488	-40.1306	-38.4521	-40.1306
0.004	-25.0244	-40.1001	-10.9863	-40.1306	-29.9072	-40.1001	-14.0381	-40.1001	-23.1934	-40.0696	-32.959	-40.1001	-48.8281	-40.1001	-62.8662	-40.0696	-36.0107	-40.1001	-114.136	-40.1001	-42.7246	-40.1001	-42.1143	-40.1001	-31.7383	-40.1306	-39.0625	-40.1001	-34.1797	-40.1001	-39.6729	-40.1001	-40.2832	-40.1001	-45.166	-40.0696	-47.6074	-40.1001
0.0045	-18.3105	-40.1306	-20.1416	-40.1001	-15.8691	-40.1001	-18.3105	-40.1001	-27.4658	-40.1306	-39.6729	-40.0696	-43.335	-40.1001	-53.7109	-40.1001	-62.2559	-40.1306	-130.005	-40.1001	-40.8936	-40.1306	-45.166	-40.1001	-36.6211	-40.1001	-34.1797	-40.1001	-38.4521	-40.1306	-36.6211	-40.1001	-63.4766	-40.1001	-42.1143	-40.1306	-50.0488	-40.1306
0.005	-3.05176	-40.1001	-23.1934	-40.0696	-18.9209	-40.1001	-29.2969	-40.1001	-21.9727	-40.1001	-45.7764	-40.1306	-30.5176	-40.1001	-55.542	-40.1001	-53.7109	-40.1306	-125.122	-40.1001	-48.2178	-40.0696	-50.0488	-40.0696	-31.7383	-40.1001	-32.959	-40.1001	-37.8418	-40.1001	-37.2314	-40.1001	-53.1006	-40.1001	-46.3867	-40.1001	-43.335	-40.1001
0.0055	-9.15527	-40.0696	-14.6484	-40.1001	-16.4795	-40.1306	-26.2451	-40.1001	-37.2314	-40.1001	-34.1797	-40.1306	-30.5176	-40.1001	-64.0869	-40.0696	-59.2041	-40.1001	-113.525	-40.1001	-41.5039	-40.1001	-51.8799	-40.1306	-43.335	-40.0696	-31.1279	-40.1001	-46.3867	-40.1001	-25.0244	-40.0696	-39.6729	-40.1001	-40.8936	-40.1001	-50.0488	-40.0696
0.006	-11.5967	-40.1001	-9.76563	-40.1001	-20.752	-40.1001	-25.0244	-40.0696	-43.9453	-40.1001	-40.8936	-40.1001	-41.5039	-40.1001	-64.6973	-40.1001	-59.8145	-40.1001	-87.8906	-40.0696	-51.2695	-40.0696	-29.9072	-40.1001	-40.8936	-40.0696	-33.5693	-40.1001	-48.8281	-40.1001	-35.4004	-40.1001	-54.9316	-40.1001	-61.6455	-40.1001	-56.7627	-40.1001
0.0065	-21.3623	-40.1001	-21.3623	-40.1001	-14.6484	-40.1001	-16.4795	-40.1001	-31.1279	-40.1001	-44.5557	-40.0696	-36.6211	-40.1001	-70.8008	-40.1001	-54.9316	-40.0696	-93.3838	-40.0696	-42.7246	-40.1001	-42.7246	-40.1001	-45.166	-40.1001	-36.0107	-40.1001	-51.8799	-40.1001	-35.4004	-40.1001	-39.0625	-40.1001	-48.2178	-40.1001	-57.373	-40.1001
0.007	-25.0244	-40.1306	-17.0898	-40.1001	-8.54492	-40.1001	-15.2588	-40.1306	-10.9863	-40.1001	-34.1797	-40.1001	-40.8936	-40.1001	-75.0732	-40.1001	-72.0215	-40.1001	-108.032	-40.1001	-32.3486	-40.1001	-50.0488	-40.1001	-44.5557	-40.1001	-53.1006	-40.0696	-40.2832	-40.0696	-36.6211	-40.1001	-38.4521	-40.1306	-49.4385	-40.1001	-54.3213	-40.1001
0.0075	-21.3623	-40.1001	-17.7002	-40.0696	-20.1416	-40.1001	-24.4141	-40.1001	-35.4004	-40.1001	-23.8037	-40.1001	-33.5693	-40.1001	-56.1523	-40.1001	-70.1904	-40.1001	-105.591	-40.1306	-41.5039	-40.1001	-53.1006	-40.1306	-48.2178	-40.1001	-32.959	-40.1001	-47.6074	-40.1001	-36.0107	-40.1001	-40.2832	-40.0696	-40.8936	-40.1001	-42.7246	-40.1306
0.008	-13.4277	-40.0696	-17.7002	-40.1306	-20.1416	-40.1001	-4.27246	-40.1001	-28.0762	-40.0696	-46.3867	-40.1001	-25.6348	-40.1001	-58.5938	-40.1001	-82.3975	-40.1001	-97.6563	-40.1306	-45.166	-40.1306	-48.2178	-40.0696	-28.6865	-40.1001	-32.3486	-40.1306	-40.8936	-40.1001	-32.959	-40.1001	-44.5557	-40.1306	-59.2041	-40.1306	-39.0625	-40.1306
0.0085	-20.752	-40.0696	-18.9209	-40.1001	-16.4795	-40.1306	-26.2451	-40.0696	-28.0762	-40.1001	-27.4658	-40.1001	-43.9453	-40.1001	-52.4902	-40.1001	-68.3594	-40.1306	-123.291	-40.1001	-38.4521	-40.1306	-32.959	-40.0696	-37.2314	-40.1306	-25.6348	-40.1001	-45.7764	-40.1306	-39.6729	-40.1306	-36.6211	-40.1001	-36.6211	-40.1001	-45.166	-40.1001
0.009	-23.8037	-40.1001	-8.54492	-40.1001	-14.6484	-40.1001	-25.0244	-40.0696	-31.7383	-40.1306	-43.9453	-40.1001	-37.2314	-40.0696	-66.5283	-40.1306	-59.2041	-40.0696	-106.201	-40.1001	-36.6211	-40.1001	-43.9453	-40.1001	-37.2314	-40.1306	-40.8936	-40.1001	-42.7246	-40.1306	-28.6865	-40.0696	-42.1143	-40.0696	-58.5938	-40.0696	-43.335	-40.1001
0.0095	-25.0244	-40.1001	-16.4795	-40.0696	-18.9209	-40.1611	-26.2451	-40.1001	-29.9072	-40.1306	-29.2969	-40.1001	-36.0107	-40.1001	-55.542	-40.1001	-65.918	-40.0696	-102.539	-40.1306	-39.6729	-40.1001	-37.8418	-40.1001	-45.7764	-40.1001	-36.6211	-40.1001	-43.9453	-40.1001	-47.6074	-40.1001	-28.6865	-40.0696	-39.6729	-40.1306	-48.2178	-40.0696
0.01	-25.0244	-40.1001	-11.5967	-40.0696	-23.1934	-40.1001	-23.8037	-40.1001	-28.0762	-40.1001	-25.0244	-40.1001	-42.1143	-40.1001	-52.4902	-40.0696	-62.2559	-40.0696	-111.694	-40.1001	-46.9971	-40.1001	-32.3486	-40.0696	-51.2695	-40.0696	-34.79	-40.1306	-30.5176	-40.1001	-34.79	-40.1001	-43.335	-40.1001	-53.7109	-40.1001	-51.8799	-40.0696
0.0105	-19.5313	-40.0696	-6.10352	-40.1001	-14.0381	-40.0696	-26.8555	-40.1001	-25.0244	-40.0696	-48.2178	-40.0696	-47.6074	-40.1001	-64.0869	-40.1001	-67.1387	-40.1001	-109.253	-40.0696	-29.2969	-40.1001	-46.3867	-40.0696	-43.335	-40.1001	-31.7383	-40.1306	-49.4385	-40.1001	-43.9453	-40.1001	-40.2832	-40.1001	-40.8936	-40.1001	-45.166	-40.1001
0.011	-21.3623	-40.1001	-8.54492	-40.1001	-22.583	-40.1306	-5.49316	-40.1001	-20.1416	-40.1001	-21.3623	-40.1306	-44.5557	-40.1001	-84.2285	-40.1306	-103.149	-40.0696	-105.591	-40.1306	-45.7764	-40.1306	-37.8418	-40.1001	-39.0625	-40.1306	-39.0625	-40.1001	-48.8281	-40.1001	-39.6729	-40.1001	-43.335	-40.0696	-42.7246	-40.1306	-49.4385	-40.1001
0.0115	-28.6865	-40.0696	-19.5313	-40.0696	-23.1934	-40.1001	-10.9863	-40.1001	-15.2588	-40.1001	-29.9072	-40.1001	-53.7109	-40.0696	-84.8389	-40.1001	-68.9697	-40.1001	-99.4873	-40.1001	-37.8418	-40.0696	-41.5039	-40.1001	-34.1797	-40.1001	-27.4658	-40.1001	-41.5039	-40.1001	-50.0488	-40.0696	-34.1797	-40.0696	-42.7246	-40.1306	-51.2695	-40.1001
0.012	-35.4004	-40.1001	1.2207	-40.1001	-19.5313	-40.0696	-20.1416	-40.1001	-31.7383	-40.1001	-50.0488	-40.0696	-38.4521	-40.1001	-77.5146	-40.0696	-78.125	-40.1001	-84.8389	-40.1001	-40.8936	-40.1001	-51.2695	-40.1001	-51.2695	-40.1001	-39.6729	-40.0696	-24.4141	-40.1001	-45.7764	-40.1001	-35.4004	-40.1001	-31.7383	-40.0696	-46.9971	-40.1001
0.0125	-21.3623	-40.1001	-1.83105	-40.1306	-30.5176	-40.0696	-24.4141	-40.1001	-29.9072	-40.1001	-37.2314	-40.1001	-29.9072	-40.0696	-83.6182	-40.0696	-63.4766	-40.1001	-84.8389	-40.1306	-34.79	-40.1001	-58.5938	-40.1001	-54.9316	-40.1306	-24.4141	-40.0696	-45.166	-40.1001	-36.6211	-40.1306	-32.3486	-40.1001	-53.1006	-40.1001	-38.4521	-40.1001
0.013	-34.79	-40.1001	-4.27246	-40.1001	-16.4795	-40.1001	-10.9863	-40.1001	-15.8691	-40.1306	-27.4658	-40.1001	-53.7109	-40.1306	-101.929	-40.0696	-50.6592	-40.0696	-93.9941	-40.1306	-36.0107	-40.1306	-42.7246	-40.1001	-39.6729	-40.1001	-29.9072	-40.1001	-38.4521	-40.0696	-43.9453	-40.1001	-29.9072	-40.1001	-46.9971	-40.1001	-51.2695	-40.1001
0.0135	-18.9209	-40.1001	-4.88281	-40.0696	-28.6865	-40.1001	-24.4141	-40.1001	-22.583	-40.1001	-33.5693	-40.1001	-43.9453	-40.1001	-79.9561	-40.1001	-50.6592	-40.1001	-82.3975	-40.1001	-42.1143	-40.1306	-31.1279	-40.0696	-39.6729	-40.1001	-33.5693	-40.1001	-34.1797	-40.1001	-45.7764	-40.1306	-37.8418	-40.1001	-40.2832	-40.1001	-43.335	-40.1001
0.014	-20.1416	-40.1306	0	-40.1001	-16.4795	-40.1001	-9.15527	-40.1306	-27.4658	-40.1001	-42.1143	-40.1001	-18.3105	-40.1001	-65.3076	-40.1306	-42.1143	-40.0696	-100.098	-40.1001	-33.5693	-40.1001	-42.1143	-40.0696	-44.5557	-40.1001	-51.2695	-40.1001	-53.7109	-40.1001	-43.9453	-40.1001	-30.5176	-40.0696	-41.5039	-40.1001	-45.7764	-40.1306
0.0145	-14.6484	-40.1001	-26.2451	-40.0696	-21.3623	-40.1001	-29.2969	-40.1001	-17.0898	-40.1001	-30.5176	-40.1306	-33.5693	-40.1306	-64.6973	-40.1001	-68.9697	-40.1001	-126.953	-40.1001	-52.4902	-40.1001	-34.79	-40.1001	-29.9072	-40.1001	-40.8936	-40.0696	-32.3486	-40.0696	-43.335	-40.1001	-45.7764	-40.1001	-60.4248	-40.0696	-41.5039	-40.1001
0.015	-12.8174	-40.1306	-24.4141	-40.1306	-27.4658	-40.1001	-12.8174	-40.1306	-17.7002	-40.0696	-37.8418	-40.1306	-40.2832	-40.1001	-67.1387	-40.1001	-45.7764	-40.1001	-137.329	-40.1001	-48.2178	-40.1001	-29.2969	-40.1001	-37.8418	-40.1001	-51.8799	-40.1001	-41.5039	-40.1306	-43.335	-40.1001	-40.8936	-40.1001	-49.4385	-40.1001	-40.2832	-40.0696
0.0155	-23.1934	-40.1306	-21.3623	-40.1306	-15.2588	-40.1001	-29.2969	-40.1306	-12.207	-40.0696	-45.7764	-40.1001	-46.3867	-40.1001	-70.1904	-40.1001	-57.9834	-40.0696	-119.629	-40.1001	-43.9453	-40.1001	-30.5176	-40.0696	-32.959	-40.0696	-35.4004	-40.1001	-27.4658	-40.1001	-42.7246	-40.0696	-44.5557	-40.1001	-57.9834	-40.1001	-51.2695	-40.1306
0.016	-27.4658	-40.1001	-23.8037	-40.1001	-28.0762	-40.1306	-18.9209	-40.1001	-10.376	-40.1001	-36.6211	-40.1306	-45.166	-40.1306	-100.708	-40.1001	-55.542	-40.0696	-107.422	-40.1306	-56.1523	-40.1001	-56.7627	-40.1001	-31.1279	-40.1001	-28.6865	-40.1001	-36.0107	-40.1001	-61.0352	-40.1001	-24.4141	-40.1001	-45.7764	-40.1001	-48.8281	-40.1001
0.0165	-12.207	-40.1306	-21.9727	-40.1306	-15.8691	-40.1001	-14.6484	-40.1001	-21.9727	-40.1001	-27.4658	-40.0696	-48.8281	-40.0696	-92.7734	-40.1001	-41.5039	-40.1306	-116.577	-40.0696	-49.4385	-40.1001	-52.4902	-40.1001	-34.1797	-40.1001	-36.6211	-40.1001	-40.8936	-40.1001	-40.2832	-40.1306	-43.9453	-40.1001	-47.6074	-40.1001	-50.6592	-40.1001
0.017	-6.10352	-40.1001	-15.2588	-40.1306	-3.66211	-40.1001	-20.1416	-40.1306	-21.3623	-40.1306	-32.959	-40.1001	-37.8418	-40.1001	-92.7734	-40.1001	-51.2695	-40.1001	-112.305	-40.0696	-65.918	-40.1001	-36.0107	-40.1001	-39.0625	-40.1001	-34.79	-40.0696	-40.2832	-40.1001	-46.3867	-40.0696	-50.6592	-40.0696	-49.4385	-40.1001	-51.2695	-40.1001
0.0175	-9.15527	-40.1001	-16.4795	-40.1001	-16.4795	-40.1001	-15.8691	-40.0696	-14.6484	-40.1001	-19.5313	-40.1306	-35.4004	-40.1001	-100.098	-40.1306	-65.3076	-40.1001	-131.226	-40.1001	-42.7246	-40.1306	-42.7246	-40.1001	-30.5176	-40.1306	-51.2695	-40.0696	-40.2832	-40.0696	-37.2314	-40.1001	-25.0244	-40.1001	-50.0488	-40.1001	-53.1006	-40.1306
0.018	-19.5313	-40.1001	-24.4141	-40.1306	-20.752	-40.1001	-20.1416	-40.1001	-30.5176	-40.1001	-33.5693	-40.1001	-49.4385	-40.1001	-70.1904	-40.1306	-57.9834	-40.0696	-108.643	-40.1001	-39.6729	-40.1001	-49.4385	-40.1001	-38.4521	-40.1001	-40.2832	-40.1306	-29.9072	-40.1001	-48.2178	-40.1001	-40.2832	-40.1001	-58.5938	-40.1001	-45.7764	-40.1001
0.0185	-24.4141	-40.1001	-17.7002	-40.1001	-30.5176	-40.1306	-15.8691	-40.1001	-32.959	-40.1306	-28.6865	-40.1001	-25.6348	-40.1001	-65.918	-40.1001	-63.4766	-40.1001	-119.629	-40.0696	-34.79	-40.1306	-45.7764	-40.1001	-42.1143	-40.0696	-39.6729	-40.1001	-43.335	-40.0696	-51.2695	-40.1001	-43.335	-40.1001	-60.4248	-40.0696	-50.0488	-40.1001
0.019	-15.2588	-40.1001	-11.5967	-40.0696	-29.2969	-40.1001	-22.583	-40.1001	-25.6348	-40.1001	-29.2969	-40.1001	-48.2178	-40.1001	-92.7734	-40.1001	-51.2695	-40.1001	-122.681	-40.1001	-34.1797	-40.1306	-35.4004	-40.1001	-37.2314	-40.1001	-45.166	-40.1001	-39.0625	-40.1001	-51.2695	-40.1001	-42.1143	-40.1001	-50.6592	-40.1001	-61.0352	-40.0696
0.0195	-14.6484	-40.1306	-12.8174	-40.0696	-17.7002	-40.1001	-19.5313	-40.1001	-34.79	-40.1001	-35.4004	-40.1001	-24.4141	-40.1306	-100.098	-40.1001	-45.7764	-40.1001	-115.967	-40.0696	-37.2314	-40.1001	-40.8936	-40.1306	-37.8418	-40.1001	-50.6592	-40.0696	-27.4658	-40.1001	-43.9453	-40.1001	-40.2832	-40.1001	-46.9971	-40.1001	-46.3867	-40.1001
0.02	-14.0381	-40.1001	-10.9863	-40.1306	-20.1416	-40.1306	-11.5967	-40.1001	-13.4277	-40.1001	-32.3486	-40.1001	-40.2832	-40.1306	-106.201	-40.0696	-50.6592	-40.1001	-158.691	-40.1306	-26.2451	-40.1001	-42.7246	-40.1001	-36.6211	-40.1306	-49.4385	-40.0696	-31.1279	-40.1001	-45.7764	-40.1001	-39.6729	-40.1001	-57.9834	-40.1001	-57.9834	-40.1306
0.0205	-23.8037	-40.1001	-12.8174	-40.1001	-17.0898	-40.1306	-17.7002	-40.1001	-17.7002	-40.1001	-48.2178	-40.1306	-33.5693	-40.1001	-109.863	-40.1001	-39.0625	-40.1001	-144.043	-40.1001	-40.2832	-40.1306	-62.2559	-40.1001	-38.4521	-40.1001	-48.8281	-40.1001	-29.9072	-40.1306	-53.7109	-40.1001	-42.1143	-40.1306	-55.542	-40.0696	-54.9316	-40.1001
0.021	-14.0381	-40.1001	-20.752	-40.1001	-29.2969	-40.1306	-15.8691	-40.0696	-15.2588	-40.1001	-33.5693	-40.1001	-42.7246	-40.1001	-91.5527	-40.0696	-57.373	-40.1001	-106.201	-40.1001	-37.8418	-40.0696	-53.1006	-40.1001	-46.9971	-40.1001	-50.0488	-40.0696	-23.8037	-40.1001	-47.6074	-40.1306	-49.4385	-40.1001	-49.4385	-40.0696	-46.9971	-40.0696
0.0215	-8.54492	-40.1001	-9.76563	-40.1001	-26.2451	-40.1001	-20.1416	-40.1306	-27.4658	-40.1001	-25.6348	-40.1001	-47.6074	-40.0696	-73.8525	-40.1001	-45.166	-40.0696	-119.629	-40.0696	-45.166	-40.0696	-45.7764	-40.0696	-37.2314	-40.1306	-42.7246	-40.1001	-40.2832	-40.1001	-39.6729	-40.1001	-40.8936	-40.1001	-53.1006	-40.0696	-53.1006	-40.0696
0.022	-18.9209	-40.1001	-15.2588	-40.1001	-29.2969	-40.1001	-10.376	-40.1001	-41.5039	-40.1001	-38.4521	-40.1001	-39.0625	-40.1001	-69.5801	-40.1306	-59.8145	-40.1001	-116.577	-40.1001	-32.959	-40.1001	-52.4902	-40.1001	-38.4521	-40.0696	-53.7109	-40.1001	-37.2314	-40.1001	-42.1143	-40.0696	-49.4385	-40.0696	-40.8936	-40.0696	-48.2178	-40.1001
0.0225	-6.10352	-40.1001	-25.0244	-40.0696	-13.4277	-40.1001	-12.8174	-40.1001	-29.9072	-40.1001	-40.8936	-40.1001	-53.7109	-40.1001	-73.8525	-40.1306	-87.8906	-40.0696	-115.356	-40.1001	-40.8936	-40.1306	-56.1523	-40.1001	-43.335	-40.0696	-43.9453	-40.1001	-46.3867	-40.1001	-34.1797	-40.1001	-46.9971	-40.1001	-48.2178	-40.1001	-49.4385	-40.1306
0.023	-8.54492	-40.1001	-10.376	-40.1001	-25.0244	-40.1001	-18.9209	-40.1001	-18.9209	-40.1001	-37.8418	-40.1001	-43.335	-40.1001	-68.3594	-40.1001	-54.9316	-40.1306	-93.9941	-40.1001	-45.7764	-40.1001	-41.5039	-40.1001	-43.9453	-40.0696	-45.7764	-40.1001	-34.1797	-40.0696	-49.4385	-40.1001	-32.3486	-40.0696	-57.373	-40.0696	-51.2695	-40.1001
0.0235	-17.7002	-40.1306	-13.4277	-40.1001	-18.9209	-40.1001	-14.6484	-40.0696	-21.3623	-40.1001	-34.1797	-40.0696	-31.7383	-40.1001	-60.4248	-40.1001	-51.2695	-40.1001	-105.591	-40.1306	-45.166	-40.1306	-46.9971	-40.1001	-43.9453	-40.0696	-42.7246	-40.1001	-32.959	-40.1001	-42.7246	-40.1001	-52.4902	-40.1001	-48.2178	-40.1001	-62.2559	-40.1001
0.024	-23.8037	-40.0696	-11.5967	-40.0696	-18.3105	-40.1001	-17.0898	-40.1001	-29.2969	-40.1001	-32.959	-40.1001	-48.2178	-40.1001	-56.1523	-40.1001	-69.5801	-40.0696	-120.85	-40.1001	-34.1797	-40.1001	-36.6211	-40.1001	-43.9453	-40.1001	-42.1143	-40.1306	-48.2178	-40.1001	-40.2832	-40.1306	-34.1797	-40.1001	-42.1143	-40.1001	-45.166	-40.1001
0.0245	-11.5967	-40.1001	-19.5313	-40.1001	-6.71387	-40.0696	-17.7002	-40.1001	-24.4141	-40.1001	-40.2832	-40.1001	-44.5557	-40.0696	-53.7109	-40.1001	-58.5938	-40.1001	-121.46	-40.1001	-43.9453	-40.1001	-55.542	-40.1001	-32.959	-40.1001	-27.4658	-40.1001	-26.8555	-40.1001	-28.0762	-40.1001	-42.1143	-40.1001	-57.9834	-40.0696	-46.9971	-40.1001
0.025	-6.71387	-40.1001	-16.4795	-40.1001	-7.93457	-40.0696	-18.3105	-40.1001	-12.8174	-40.1001	-51.2695	-40.1001	-37.8418	-40.0696	-62.8662	-40.1306	-45.166	-40.1001	-126.343	-40.0696	-35.4004	-40.1001	-40.2832	-40.0696	-48.8281	-40.1001	-33.5693	-40.0696	-40.8936	-40.1001	-44.5557	-40.1001	-42.1143	-40.1306	-39.0625	-40.1001	-46.3867	-40.1306
0.0255	-10.9863	-40.1001	-12.8174	-40.0696	-32.3486	-40.1001	-9.76563	-40.1001	-37.2314	-40.0696	-35.4004	-40.1001	-39.0625	-40.1001	-79.3457	-40.1001	-68.9697	-40.0696	-101.318	-40.1001	-36.6211	-40.0696	-43.9453	-40.1306	-39.6729	-40.1001	-46.9971	-40.1001	-30.5176	-40.1306	-36.6211	-40.1001	-53.7109	-40.1001	-37.2314	-40.0696	-59.8145	-40.0696
0.026	-5.49316	-40.1001	-20.752	-40.0696	-27.4658	-40.1001	-21.3623	-40.1001	-31.7383	-40.1001	-31.1279	-40.1306	-19.5313	-40.1001	-96.4355	-40.0696	-39.0625	-40.1001	-118.408	-40.0696	-35.4004	-40.1001	-39.6729	-40.1001	-46.3867	-40.1001	-26.2451	-40.1001	-39.0625	-40.0696	-46.3867	-40.1001	-45.166	-40.1306	-39.6729	-40.1001	-47.6074	-40.1001
0.0265	-15.2588	-40.1001	-11.5967	-40.1001	-21.9727	-40.1001	-12.8174	-40.1001	-20.752	-40.1306	-37.2314	-40.1001	-39.6729	-40.0696	-94.6045	-40.1001	-54.3213	-40.1001	-90.332	-40.0696	-41.5039	-40.1306	-48.2178	-40.1001	-40.2832	-40.1306	-42.7246	-40.0696	-40.8936	-40.1001	-39.6729	-40.0696	-42.7246	-40.1001	-31.1279	-40.1001	-49.4385	-40.1001
0.027	-31.1279	-40.1001	-18.3105	-40.1001	-34.79	-40.1001	-26.8555	-40.1001	-21.9727	-40.1001	-32.959	-40.1001	-34.1797	-40.1001	-76.2939	-40.1001	-62.2559	-40.1001	-100.708	-40.0696	-44.5557	-40.1001	-43.335	-40.1306	-51.8799	-40.1001	-41.5039	-40.1001	-42.1143	-40.1001	-45.7764	-40.1001	-41.5039	-40.1001	-45.166	-40.1306	-41.5039	-40.1001
0.0275	-9.76563	-40.1001	-18.3105	-40.1001	-35.4004	-40.1001	-25.6348	-40.0696	-24.4141	-40.1001	-32.959	-40.0696	-50.0488	-40.1001	-57.373	-40.1001	-70.8008	-40.0696	-106.201	-40.1306	-46.3867	-40.0696	-59.8145	-40.1001	-45.7764	-40.1306	-36.0107	-40.1001	-41.5039	-40.1001	-51.2695	-40.1001	-38.4521	-40.1306	-42.7246	-40.1001	-54.3213	-40.0696
0.028	-10.9863	-40.1001	-6.71387	-40.1306	-37.2314	-40.1001	-17.0898	-40.1306	-18.3105	-40.1001	-40.8936	-40.1001	-41.5039	-40.0696	-57.373	-40.0696	-54.9316	-40.1001	-117.188	-40.1306	-51.2695	-40.1001	-42.7246	-40.1001	-43.9453	-40.1001	-31.7383	-40.0696	-31.7383	-40.1001	-38.4521	-40.1306	-43.9453	-40.1001	-50.6592	-40.1001	-48.8281	-40.1001
0.0285	-24.4141	-40.1306	-18.9209	-40.1306	-15.8691	-40.1306	-15.8691	-40.1001	-22.583	-40.1001	-31.7383	-40.1001	-46.3867	-40.1306	-59.8145	-40.1306	-42.1143	-40.0696	-94.6045	-40.1001	-33.5693	-40.1001	-44.5557	-40.1001	-46.9971	-40.1306	-40.8936	-40.1001	-41.5039	-40.1001	-54.9316	-40.1001	-42.7246	-40.1001	-39.6729	-40.1001	-52.4902	-40.1001
0.029	-24.4141	-40.1001	-14.6484	-40.1001	-25.0244	-40.1001	-12.8174	-40.1001	-9.76563	-40.0696	-20.1416	-40.1001	-51.8799	-40.1001	-60.4248	-40.1306	-47.6074	-40.1001	-116.577	-40.1001	-23.8037	-40.0696	-35.4004	-40.1001	-37.2314	-40.1001	-35.4004	-40.1001	-49.4385	-40.1001	-51.2695	-40.1001	-28.6865	-40.1001	-36.0107	-40.1001	-54.3213	-40.1001
0.0295	-17.0898	-40.1001	-19.5313	-40.1306	-28.0762	-40.1001	-17.7002	-40.1001	-14.6484	-40.1001	-32.959	-40.1306	-34.1797	-40.0696	-70.1904	-40.1001	-62.8662	-40.1001	-109.863	-40.0696	-42.1143	-40.0696	-36.6211	-40.1001	-44.5557	-40.0696	-40.2832	-40.1306	-36.6211	-40.1306	-50.6592	-40.1001	-35.4004	-40.0696	-56.1523	-40.0696	-56.7627	-40.1001
0.03	-26.8555	-40.1306	-4.88281	-40.0696	-24.4141	-40.1001	-18.3105	-40.1001	-19.5313	-40.1306	-31.1279	-40.1001	-36.6211	-40.1001	-78.7354	-40.1306	-49.4385	-40.1001	-100.708	-40.1001	-32.3486	-40.1001	-45.166	-40.1001	-51.2695	-40.1306	-42.7246	-40.1001	-44.5557	-40.1001	-47.6074	-40.0696	-46.9971	-40.1001	-50.6592	-40.1001	-62.2559	-40.0696
0.0305	-18.9209	-40.1001	-15.2588	-40.1001	-31.7383	-40.1306	-19.5313	-40.0696	-13.4277	-40.1001	-42.7246	-40.1001	-53.7109	-40.1001	-73.8525	-40.1001	-92.1631	-40.1001	-81.1768	-40.1001	-40.8936	-40.1001	-33.5693	-40.0696	-35.4004	-40.1001	-44.5557	-40.1001	-46.9971	-40.1001	-48.8281	-40.0696	-50.6592	-40.1001	-53.1006	-40.1001	-49.4385	-40.0696
0.031	-14.0381	-40.1001	-18.9209	-40.1001	-27.4658	-40.1001	-25.6348	-40.1001	-30.5176	-40.1001	-45.166	-40.0696	-45.7764	-40.1001	-65.3076	-40.1001	-91.5527	-40.1306	-63.4766	-40.0696	-47.6074	-40.1306	-31.7383	-40.0696	-31.1279	-40.1001	-43.335	-40.1001	-43.9453	-40.1306	-41.5039	-40.1001	-38.4521	-40.0696	-57.9834	-40.1001	-50.6592	-40.0696
0.0315	-20.1416	-40.0696	-25.0244	-40.1001	-14.6484	-40.0696	-20.752	-40.1001	-28.6865	-40.1001	-39.0625	-40.1306	-59.2041	-40.1001	-64.0869	-40.1306	-95.2148	-40.1001	-87.8906	-40.1001	-37.8418	-40.0696	-48.8281	-40.1001	-42.7246	-40.1306	-37.8418	-40.1306	-45.7764	-40.1001	-39.6729	-40.1001	-35.4004	-40.1001	-51.8799	-40.1001	-47.6074	-40.1306
0.032	-15.2588	-40.0696	-10.376	-40.1306	-6.10352	-40.1306	-6.10352	-40.1001	-32.3486	-40.1001	-34.79	-40.1001	-62.2559	-40.1001	-48.8281	-40.1306	-87.8906	-40.1001	-93.3838	-40.1306	-39.0625	-40.0696	-43.335	-40.1306	-46.3867	-40.0696	-52.4902	-40.1001	-25.0244	-40.1001	-51.2695	-40.1306	-33.5693	-40.1001	-40.8936	-40.1001	-63.4766	-40.1001
0.0325	-12.8174	-40.1001	-12.8174	-40.1001	-20.1416	-40.1001	-25.0244	-40.0696	-34.1797	-40.0696	-28.6865	-40.1001	-34.1797	-40.0696	-59.8145	-40.0696	-112.305	-40.1001	-112.305	-40.0696	-33.5693	-40.1001	-36.6211	-40.1001	-42.1143	-40.1001	-29.9072	-40.1001	-36.0107	-40.1001	-45.7764	-40.1306	-43.335	-40.1001	-45.166	-40.1001	-62.2559	-40.1001
0.033	-17.7002	-40.1306	-8.54492	-40.1001	-24.4141	-40.1001	-15.2588	-40.1306	-29.2969	-40.1001	-23.8037	-40.1001	-43.335	-40.1001	-55.542	-40.1001	-87.8906	-40.1001	-105.591	-40.1001	-27.4658	-40.1306	-42.1143	-40.0696	-48.8281	-40.1306	-34.79	-40.1001	-29.2969	-40.0696	-48.2178	-40.1306	-54.9316	-40.0696	-53.7109	-40.1001	-48.8281	-40.1306
0.0335	-18.3105	-40.1306	-5.49316	-40.1001	-25.6348	-40.1001	-15.2588	-40.1001	-25.0244	-40.1001	-18.3105	-40.1306	-32.959	-40.1001	-41.5039	-40.1001	-106.812	-40.0696	-100.708	-40.1001	-39.6729	-40.1001	-29.9072	-40.1001	-25.6348	-40.1306	-46.3867	-40.1306	-34.79	-40.0696	-50.0488	-40.1001	-42.7246	-40.0696	-57.373	-40.1001	-60.4248	-40.1001
0.034	-20.752	-40.1001	-15.2588	-40.1001	-12.207	-40.1001	-13.4277	-40.1001	-21.9727	-40.1001	-27.4658	-40.1001	-44.5557	-40.1001	-35.4004	-40.1001	-117.798	-40.1001	-98.2666	-40.0391	-45.166	-40.1001	-26.8555	-40.1001	-36.0107	-40.1001	-45.7764	-40.1001	-32.959	-40.0696	-51.2695	-40.1001	-38.4521	-40.1001	-36.6211	-40.1306	-56.7627	-40.0696
0.0345	-6.71387	-40.1001	-18.3105	-40.1306	-15.2588	-40.1001	-12.8174	-40.1001	-25.6348	-40.0696	-40.8936	-40.1001	-43.9453	-40.1001	-43.335	-40.1306	-109.863	-40.0696	-49.4385	-40.0696	-45.166	-40.1306	-35.4004	-40.1001	-36.0107	-40.1001	-48.8281	-40.1001	-43.335	-40.1001	-51.2695	-40.1001	-34.79	-40.1001	-55.542	-40.1001	-53.1006	-40.1001
0.035	-23.8037	-40.1001	-17.0898	-40.1001	-16.4795	-40.1001	-1.2207	-40.1001	-10.9863	-40.0696	-23.8037	-40.1001	-56.1523	-40.1306	-54.3213	-40.1001	-93.3838	-40.1306	-81.1768	-40.1001	-37.8418	-40.1001	-46.9971	-40.1001	-46.3867	-40.0696	-53.7109	-40.1001	-40.2832	-40.0696	-51.2695	-40.1001	-39.6729	-40.1001	-47.6074	-40.1001	-49.4385	-40.1001
0.0355	-20.752	-40.1306	-15.8691	-40.1306	-9.76563	-40.1001	-17.7002	-40.1001	-21.9727	-40.1001	-38.4521	-40.0696	-49.4385	-40.1306	-71.4111	-40.1001	-61.6455	-40.1001	-72.6318	-40.0696	-40.2832	-40.1001	-28.6865	-40.0696	-24.4141	-40.1001	-45.7764	-40.1001	-48.8281	-40.1001	-45.166	-40.1001	-54.9316	-40.1001	-46.3867	-40.1306	-55.542	-40.1001
0.036	-15.8691	-40.1001	-26.2451	-40.1306	-19.5313	-40.1001	-15.2588	-40.1001	-18.9209	-40.1001	-14.0381	-40.1001	-37.2314	-40.1306	-72.0215	-40.1001	-59.8145	-40.1001	-78.7354	-40.1001	-45.7764	-40.1001	-44.5557	-40.1001	-35.4004	-40.1001	-52.4902	-40.1001	-41.5039	-40.1001	-47.6074	-40.1306	-39.6729	-40.0696	-48.2178	-40.1001	-50.6592	-40.1001
0.0365	-7.93457	-40.1001	-11.5967	-40.1001	-21.9727	-40.1306	-17.0898	-40.1306	-32.3486	-40.1001	-30.5176	-40.1001	-37.2314	-40.1001	-79.3457	-40.1001	-41.5039	-40.0696	-115.967	-40.1001	-36.0107	-40.0696	-23.8037	-40.0696	-31.1279	-40.1001	-38.4521	-40.1001	-50.0488	-40.0696	-50.6592	-40.1001	-42.1143	-40.0696	-50.6592	-40.1001	-53.7109	-40.1001
0.037	-18.3105	-40.1001	-29.2969	-40.1306	-5.49316	-40.1001	-10.376	-40.0696	-10.376	-40.1001	-29.9072	-40.0696	-27.4658	-40.1001	-66.5283	-40.1001	-44.5557	-40.1306	-101.929	-40.0696	-65.3076	-40.1001	-40.8936	-40.1001	-33.5693	-40.1001	-31.1279	-40.1001	-40.2832	-40.0696	-48.2178	-40.1001	-56.1523	-40.1001	-44.5557	-40.1001	-53.1006	-40.0696
0.0375	-25.6348	-40.1001	-14.6484	-40.1001	-25.0244	-40.1001	-15.8691	-40.1306	-23.1934	-40.1306	-21.9727	-40.0696	-30.5176	-40.1001	-75.0732	-40.1001	-53.1006	-40.1306	-103.76	-40.0696	-57.373	-40.1001	-37.2314	-40.0696	-39.6729	-40.0696	-41.5039	-40.1306	-42.7246	-40.0696	-60.4248	-40.1001	-37.8418	-40.1001	-40.2832	-40.0696	-57.373	-40.1001
0.038	-21.3623	-40.1306	-6.10352	-40.1001	-7.32422	-40.1001	-6.10352	-40.1001	-21.9727	-40.1001	-28.6865	-40.0696	-42.7246	-40.1001	-69.5801	-40.1306	-52.4902	-40.1001	-124.512	-40.0696	-45.7764	-40.1001	-45.166	-40.1001	-30.5176	-40.1306	-46.3867	-40.1001	-28.6865	-40.1001	-56.7627	-40.1001	-42.7246	-40.1001	-53.1006	-40.0696	-64.0869	-40.0696
0.0385	-18.3105	-40.1001	-22.583	-40.1306	-11.5967	-40.1001	-20.1416	-40.1001	-35.4004	-40.0696	-21.3623	-40.1001	-43.9453	-40.0696	-98.2666	-40.1001	-57.9834	-40.1001	-107.422	-40.1001	-39.0625	-40.1001	-42.1143	-40.1001	-36.0107	-40.1001	-45.7764	-40.1001	-36.0107	-40.1306	-58.5938	-40.1306	-45.166	-40.1001	-45.7764	-40.1001	-51.2695	-40.1001
0.039	-18.3105	-40.0696	-16.4795	-40.1001	-14.0381	-40.1306	-26.8555	-40.1306	-32.959	-40.1001	-23.8037	-40.1306	-39.0625	-40.0696	-53.1006	-40.1306	-58.5938	-40.0696	-113.525	-40.1001	-53.7109	-40.1001	-41.5039	-40.1001	-33.5693	-40.1306	-50.0488	-40.1001	-36.0107	-40.0696	-56.1523	-40.0696	-40.2832	-40.1001	-37.2314	-40.1001	-50.6592	-40.1001
0.0395	-14.6484	-40.1001	-13.4277	-40.1001	-8.54492	-40.1001	-27.4658	-40.1001	-14.6484	-40.0696	-21.9727	-40.1001	-49.4385	-40.1001	-81.1768	-40.1001	-35.4004	-40.1001	-114.746	-40.1001	-40.8936	-40.0696	-52.4902	-40.1001	-34.1797	-40.1001	-42.7246	-40.0696	-25.0244	-40.1001	-36.6211	-40.1001	-35.4004	-40.1306	-36.6211	-40.1001	-66.5283	-40.1001
0.04	-22.583	-40.0696	-21.3623	-40.1001	-7.32422	-40.1306	-26.2451	-40.1306	-23.1934	-40.1001	-25.0244	-40.0696	-46.3867	-40.1001	-87.2803	-40.0696	-44.5557	-40.1001	-123.291	-40.1306	-46.9971	-40.1001	-45.166	-40.1001	-26.2451	-40.1306	-49.4385	-40.1001	-43.335	-40.1001	-50.0488	-40.1306	-45.166	-40.1001	-39.6729	-40.0696	-44.5557	-40.1001
0.0405	-32.959	-40.1306	-17.0898	-40.1001	-4.27246	-40.0696	-23.1934	-40.0696	-34.79	-40.1001	-30.5176	-40.1001	-41.5039	-40.1001	-112.305	-40.1001	-39.0625	-40.1001	-100.708	-40.0696	-46.3867	-40.1001	-37.8418	-40.1306	-42.1143	-40.1306	-43.335	-40.1001	-35.4004	-40.0696	-45.166	-40.1001	-59.2041	-40.0696	-42.7246	-40.1306	-61.0352	-40.1001
0.041	-13.4277	-40.1001	-16.4795	-40.1001	-23.1934	-40.1001	-21.9727	-40.1001	-18.3105	-40.1001	-32.3486	-40.1306	-28.0762	-40.1001	-91.5527	-40.1001	-45.7764	-40.1001	-91.5527	-40.1306	-37.2314	-40.1001	-43.335	-40.1306	-29.9072	-40.1001	-50.6592	-40.1001	-17.7002	-40.1306	-56.1523	-40.0696	-61.6455	-40.1001	-43.9453	-40.0696	-67.749	-40.1001
0.0415	-12.8174	-40.1001	-17.7002	-40.0696	-27.4658	-40.1001	-19.5313	-40.1001	-38.4521	-40.1001	-21.9727	-40.1001	-50.0488	-40.0696	-98.877	-40.0696	-46.9971	-40.1001	-86.6699	-40.1306	-37.2314	-40.1001	-41.5039	-40.1001	-41.5039	-40.1001	-55.542	-40.1001	-40.2832	-40.0696	-46.3867	-40.0696	-31.7383	-40.1001	-45.166	-40.0696	-39.6729	-40.1001
0.042	-6.71387	-40.1306	-23.1934	-40.1001	-25.0244	-40.0696	-6.10352	-40.1001	-39.0625	-40.1001	-19.5313	-40.1001	-45.7764	-40.1001	-82.3975	-40.1001	-46.9971	-40.1001	-109.863	-40.0696	-34.1797	-40.0696	-40.8936	-40.1001	-29.9072	-40.0696	-59.2041	-40.1001	-39.0625	-40.0696	-45.7764	-40.1001	-44.5557	-40.1001	-44.5557	-40.1001	-49.4385	-40.1001
0.0425	-12.8174	-40.1001	-16.4795	-40.1001	-10.9863	-40.0696	-25.0244	-40.1001	-29.2969	-40.1001	-25.0244	-40.1001	-45.166	-40.1001	-76.2939	-40.1306	-57.9834	-40.1001	-111.084	-40.1001	-48.2178	-40.1001	-42.1143	-40.1001	-41.5039	-40.0696	-51.8799	-40.1306	-47.6074	-40.1001	-34.79	-40.1001	-54.9316	-40.1001	-40.8936	-40.0696	-56.1523	-40.0696
0.043	-8.54492	-40.1001	-16.4795	-40.1001	-11.5967	-40.1001	-6.10352	-40.1001	-22.583	-40.1001	-23.1934	-40.1001	-34.1797	-40.1001	-87.8906	-40.1001	-56.1523	-40.0696	-106.201	-40.1001	-43.9453	-40.1001	-46.9971	-40.1001	-39.0625	-40.0696	-34.79	-40.1001	-40.2832	-40.0696	-28.0762	-40.1001	-50.0488	-40.1306	-43.335	-40.1001	-47.6074	-40.1306
0.0435	-25.0244	-40.1001	-16.4795	-40.1306	-30.5176	-40.1001	-17.0898	-40.1001	-19.5313	-40.1001	-23.1934	-40.0696	-43.335	-40.1001	-82.3975	-40.1001	-90.9424	-40.1306	-116.577	-40.0696	-51.2695	-40.1001	-39.0625	-40.1001	-42.7246	-40.1306	-36.6211	-40.1306	-34.79	-40.1001	-32.3486	-40.1001	-51.2695	-40.1306	-48.2178	-40.0696	-51.8799	-40.1001
0.044	-17.0898	-40.1001	-28.0762	-40.1306	-15.2588	-40.0696	-17.7002	-40.1001	-19.5313	-40.1001	-32.959	-40.1001	-46.9971	-40.1001	-90.9424	-40.1306	-53.1006	-40.1001	-91.5527	-40.1306	-57.9834	-40.1001	-46.3867	-40.1001	-46.3867	-40.1306	-41.5039	-40.1001	-37.2314	-40.1001	-48.2178	-40.1001	-41.5039	-40.1001	-38.4521	-40.1001	-42.7246	-40.1001
0.0445	-19.5313	-40.1001	-9.15527	-40.1001	-13.4277	-40.0391	-6.71387	-40.1001	-26.2451	-40.1306	-26.8555	-40.1001	-43.9453	-40.0696	-89.1113	-40.1001	-65.3076	-40.1001	-78.125	-40.1306	-58.5938	-40.1306	-48.2178	-40.1306	-36.0107	-40.1001	-62.2559	-40.1001	-37.8418	-40.0696	-52.4902	-40.0696	-45.7764	-40.0696	-37.8418	-40.1001	-50.0488	-40.1001
0.045	-12.8174	-40.1306	-17.0898	-40.1001	-17.0898	-40.1306	-32.3486	-40.0696	-28.6865	-40.1306	-21.9727	-40.0391	-43.335	-40.0696	-87.8906	-40.1306	-66.5283	-40.1001	-102.539	-40.1001	-44.5557	-40.1001	-41.5039	-40.1001	-61.0352	-40.1001	-40.2832	-40.1001	-45.166	-40.1001	-50.6592	-40.1001	-38.4521	-40.0696	-35.4004	-40.0696	-54.9316	-40.0696
0.0455	-29.9072	-40.1001	-17.7002	-40.1001	-9.76563	-40.1001	-23.8037	-40.1001	-38.4521	-40.1001	-15.2588	-40.1306	-35.4004	-40.1001	-108.643	-40.1001	-69.5801	-40.1306	-111.694	-40.1001	-43.335	-40.1001	-43.335	-40.1306	-46.9971	-40.1001	-46.9971	-40.1001	-42.7246	-40.1001	-52.4902	-40.1001	-40.8936	-40.1001	-49.4385	-40.1001	-45.166	-40.1001
0.046	-20.1416	-40.1001	-6.71387	-40.0696	-10.9863	-40.1001	-28.0762	-40.0696	-28.0762	-40.1001	-29.2969	-40.1001	-21.3623	-40.1001	-78.125	-40.1001	-42.1143	-40.1001	-97.0459	-40.1001	-39.6729	-40.1001	-36.6211	-40.1001	-34.1797	-40.1001	-32.959	-40.1001	-46.3867	-40.1001	-52.4902	-40.0696	-56.7627	-40.1001	-34.79	-40.1001	-46.9971	-40.1001
0.0465	-23.8037	-40.1001	-20.1416	-40.1001	-21.9727	-40.1001	-17.0898	-40.1001	-28.6865	-40.1001	-29.9072	-40.0696	-28.0762	-40.1001	-72.0215	-40.1001	-67.1387	-40.1001	-82.3975	-40.1001	-26.8555	-40.0696	-43.335	-40.1001	-37.2314	-40.1001	-27.4658	-40.1001	-46.3867	-40.0696	-39.6729	-40.1001	-51.8799	-40.1306	-22.583	-40.1001	-51.8799	-40.0696
0.047	-25.0244	-40.1001	-20.1416	-40.1001	-27.4658	-40.1001	-20.1416	-40.1001	-16.4795	-40.1001	-33.5693	-40.1001	-40.8936	-40.1001	-77.5146	-40.1001	-58.5938	-40.1306	-87.2803	-40.1001	-40.8936	-40.1001	-66.5283	-40.0696	-48.2178	-40.1001	-39.6729	-40.1001	-33.5693	-40.0696	-41.5039	-40.1001	-38.4521	-40.1001	-32.959	-40.1001	-51.8799	-40.1001
0.0475	-23.8037	-40.1001	-23.8037	-40.1001	-17.7002	-40.1001	-21.3623	-40.1306	-22.583	-40.1001	-16.4795	-40.0696	-28.0762	-40.1001	-73.8525	-40.1001	-52.4902	-40.1001	-112.305	-40.1001	-54.9316	-40.1001	-41.5039	-40.1306	-39.6729	-40.1001	-39.6729	-40.1001	-38.4521	-40.1001	-43.335	-40.1001	-39.0625	-40.1306	-46.9971	-40.1001	-65.3076	-40.1001
0.048	-14.6484	-40.0696	-7.32422	-40.1001	-20.752	-40.1001	3.66211	-40.1001	-29.2969	-40.1001	-14.0381	-40.0696	-41.5039	-40.1001	-75.0732	-40.0696	-57.373	-40.1001	-98.2666	-40.1306	-54.3213	-40.0696	-47.6074	-40.1001	-51.2695	-40.1001	-42.7246	-40.1001	-34.1797	-40.1001	-36.6211	-40.1306	-41.5039	-40.1306	-36.0107	-40.1001	-59.8145	-40.1001
0.0485	-19.5313	-40.1306	-10.9863	-40.1306	-8.54492	-40.1001	-10.376	-40.0696	-23.1934	-40.1001	-36.0107	-40.1001	-45.166	-40.1001	-63.4766	-40.1001	-48.8281	-40.1306	-88.501	-40.1001	-38.4521	-40.1306	-36.6211	-40.1001	-59.8145	-40.0696	-23.1934	-40.1001	-31.7383	-40.1001	-36.0107	-40.0696	-42.7246	-40.0696	-57.373	-40.1001	-49.4385	-40.1001
0.049	-21.9727	-40.1306	1.2207	-40.1001	-14.0381	-40.1001	-20.752	-40.1001	-20.1416	-40.1001	-28.6865	-40.1306	-50.6592	-40.1001	-77.5146	-40.1306	-45.7764	-40.1001	-79.9561	-40.1001	-47.6074	-40.1001	-54.9316	-40.1306	-52.4902	-40.1306	-40.8936	-40.0696	-39.0625	-40.1001	-62.2559	-40.0696	-28.6865	-40.0391	-40.8936	-40.1001	-57.9834	-40.0696
0.0495	-14.6484	-40.1001	-24.4141	-40.0696	-15.8691	-40.1001	-28.0762	-40.0696	-17.0898	-40.0696	-21.9727	-40.1306	-44.5557	-40.1001	-71.4111	-40.1001	-58.5938	-40.1306	-69.5801	-40.0696	-46.9971	-40.1306	-26.2451	-40.1001	-50.0488	-40.1306	-42.7246	-40.1001	-41.5039	-40.1001	-25.0244	-40.0696	-36.0107	-40.1001	-33.5693	-40.1001	-57.373	-40.1001
0.05	-25.0244	-40.1001	-11.5967	-40.0696	-25.0244	-40.1001	-25.6348	-40.1001	-20.1416	-40.1001	-39.0625	-40.1001	-32.959	-40.1001	-89.1113	-40.1001	-44.5557	-40.1001	-68.9697	-40.0696	-48.2178	-40.1306	-48.8281	-40.1001	-67.1387	-40.1001	-40.2832	-40.1306	-41.5039	-40.1001	-39.0625	-40.1001	-33.5693	-40.1001	-48.2178	-40.1306	-54.9316	-40.1001
0.0505	-15.8691	-40.1001	-9.15527	-40.1306	-35.4004	-40.1001	-17.7002	-40.1306	-31.1279	-40.1001	-21.3623	-40.1001	-30.5176	-40.1001	-75.6836	-40.1001	-41.5039	-40.0696	-57.373	-40.1001	-43.9453	-40.1001	-34.79	-40.1001	-46.9971	-40.0696	-36.6211	-40.0696	-43.335	-40.1001	-49.4385	-40.1001	-34.1797	-40.1001	-53.7109	-40.1001	-51.8799	-40.1306
0.051	-18.3105	-40.1001	-10.9863	-40.1001	-31.7383	-40.1001	-26.2451	-40.1001	-29.9072	-40.0696	-20.752	-40.0391	-31.7383	-40.1001	-92.1631	-40.1001	-59.8145	-40.0696	-78.125	-40.0696	-28.6865	-40.1001	-42.1143	-40.1001	-61.0352	-40.1001	-37.2314	-40.1001	-39.6729	-40.1001	-46.3867	-40.1001	-42.1143	-40.1306	-37.2314	-40.1001	-45.7764	-40.0696
0.0515	-12.207	-40.1001	-14.0381	-40.1306	-7.93457	-40.1001	-28.0762	-40.1001	-25.0244	-40.1306	-23.8037	-40.1001	-28.6865	-40.1001	-96.4355	-40.1001	-72.6318	-40.1001	-83.6182	-40.1001	-38.4521	-40.1001	-31.1279	-40.1001	-57.373	-40.1001	-28.0762	-40.0696	-34.1797	-40.0696	-41.5039	-40.1001	-44.5557	-40.1001	-50.6592	-40.1001	-55.542	-40.0696
0.052	-18.9209	-40.1001	-4.27246	-40.1001	-18.9209	-40.1001	-20.752	-40.1306	-11.5967	-40.1306	-29.2969	-40.1001	-45.166	-40.1001	-100.098	-40.1001	-71.4111	-40.1306	-93.9941	-40.1306	-38.4521	-40.1001	-37.2314	-40.1001	-50.6592	-40.1001	-30.5176	-40.0696	-36.6211	-40.1001	-62.8662	-40.0696	-26.8555	-40.0696	-42.1143	-40.1001	-56.7627	-40.1001
0.0525	-29.2969	-40.1001	-15.2588	-40.1001	-26.8555	-40.0696	-21.3623	-40.1306	-9.76563	-40.1001	-21.9727	-40.1001	-37.2314	-40.1306	-72.6318	-40.1306	-71.4111	-40.0696	-95.2148	-40.1001	-32.959	-40.1001	-35.4004	-40.1001	-57.373	-40.1001	-20.752	-40.1001	-45.166	-40.1001	-51.8799	-40.1001	-37.2314	-40.1306	-36.6211	-40.0696	-42.7246	-40.1001
0.053	-27.4658	-40.1306	1.2207	-40.1001	-28.0762	-40.1001	-23.1934	-40.0696	-20.1416	-40.1001	-36.0107	-40.0696	-47.6074	-40.1306	-83.6182	-40.0696	-65.918	-40.1001	-75.0732	-40.0696	-22.583	-40.0696	-29.9072	-40.1001	-54.9316	-40.1306	-35.4004	-40.1001	-50.0488	-40.0696	-45.7764	-40.1306	-46.9971	-40.0696	-47.6074	-40.1001	-65.3076	-40.1001
0.0535	-23.8037	-40.1306	-6.71387	-40.1001	-4.27246	-40.0696	-14.6484	-40.0696	-20.752	-40.1001	-17.7002	-40.1001	-42.1143	-40.0696	-97.6563	-40.1001	-34.1797	-40.1001	-103.76	-40.1001	-52.4902	-40.1306	-39.0625	-40.0696	-40.2832	-40.1306	-32.959	-40.1306	-36.0107	-40.0696	-52.4902	-40.1001	-34.79	-40.1001	-40.8936	-40.1001	-63.4766	-40.0696
0.054	-30.5176	-40.1001	-9.15527	-40.1001	-13.4277	-40.1306	-24.4141	-40.0696	-25.0244	-40.1001	-32.959	-40.1001	-37.8418	-40.1001	-96.4355	-40.1306	-61.6455	-40.1001	-93.9941	-40.1001	-51.2695	-40.1001	-44.5557	-40.1001	-45.7764	-40.0696	-36.0107	-40.1306	-40.2832	-40.1001	-56.7627	-40.1306	-31.7383	-40.1001	-38.4521	-40.1001	-45.7764	-40.1001
0.0545	-15.2588	-40.1001	-12.207	-40.1001	-7.93457	-40.1001	-17.7002	-40.1001	-31.7383	-40.1001	-29.2969	-40.1001	-50.0488	-40.1001	-97.6563	-40.1001	-42.7246	-40.1306	-106.812	-40.0696	-44.5557	-40.0696	-34.1797	-40.1001	-43.335	-40.1001	-31.1279	-40.1001	-39.0625	-40.1001	-65.918	-40.0696	-43.9453	-40.1001	-42.1143	-40.1001	-61.6455	-40.0696
0.055	-12.207	-40.1001	-4.88281	-40.1001	-15.8691	-40.1001	-5.49316	-40.1306	-9.15527	-40.0696	-29.2969	-40.1001	-48.2178	-40.1001	-85.4492	-40.0696	-67.749	-40.1306	-100.098	-40.1001	-44.5557	-40.1306	-42.1143	-40.1001	-40.8936	-40.1001	-48.8281	-40.1001	-32.3486	-40.1001	-59.2041	-40.0696	-42.1143	-40.1001	-26.2451	-40.1001	-59.8145	-40.1001
0.0555	-12.207	-40.1001	-7.93457	-40.1001	-16.4795	-40.1001	-22.583	-40.1001	-25.6348	-40.0696	-37.2314	-40.0696	-48.2178	-40.1001	-93.9941	-40.1001	-74.4629	-40.0696	-86.6699	-40.1001	-50.0488	-40.1001	-42.7246	-40.1001	-35.4004	-40.1001	-47.6074	-40.1001	-34.1797	-40.1001	-54.9316	-40.1001	-40.2832	-40.1001	-33.5693	-40.1611	-62.2559	-40.1001
0.056	-23.1934	-40.1306	-14.0381	-40.1001	-21.3623	-40.1306	-25.6348	-40.1001	-26.8555	-40.0696	-23.8037	-40.1001	-36.0107	-40.1306	-77.5146	-40.0696	-68.3594	-40.1306	-104.98	-40.0696	-39.0625	-40.1001	-36.0107	-40.1001	-37.8418	-40.1001	-34.79	-40.1001	-33.5693	-40.1001	-62.2559	-40.1001	-29.9072	-40.1001	-36.6211	-40.1001	-54.3213	-40.1001
0.0565	-14.6484	-40.1001	-20.1416	-40.1001	-10.376	-40.1001	-26.2451	-40.1001	-33.5693	-40.1001	-26.2451	-40.1001	-32.3486	-40.0696	-82.3975	-40.1001	-70.8008	-40.1001	-107.422	-40.1001	-45.166	-40.1001	-30.5176	-40.1001	-45.7764	-40.1306	-38.4521	-40.0696	-41.5039	-40.1001	-56.1523	-40.1001	-31.1279	-40.0696	-30.5176	-40.1001	-66.5283	-40.0696
0.057	-8.54492	-40.0696	-3.05176	-40.1001	-1.83105	-40.1001	-32.3486	-40.1001	-14.0381	-40.1306	-24.4141	-40.1001	-47.6074	-40.1306	-92.7734	-40.0696	-44.5557	-40.1001	-118.408	-40.1001	-57.373	-40.1306	-38.4521	-40.1001	-40.2832	-40.1001	-46.3867	-40.1001	-37.2314	-40.0696	-61.0352	-40.1001	-45.166	-40.1001	-50.0488	-40.1001	-62.2559	-40.1001
0.0575	-30.5176	-40.1001	-20.752	-40.0696	-9.15527	-40.1306	-26.8555	-40.1001	-17.7002	-40.1001	-31.7383	-40.1306	-43.9453	-40.1001	-83.6182	-40.1001	-60.4248	-40.1001	-108.643	-40.1001	-36.6211	-40.1001	-44.5557	-40.1001	-32.959	-40.1001	-44.5557	-40.1001	-34.79	-40.1001	-54.3213	-40.1001	-40.8936	-40.1001	-45.7764	-40.1001	-56.7627	-40.1306
0.058	-13.4277	-40.1306	-16.4795	-40.0696	-27.4658	-40.1001	-28.6865	-40.1001	-21.3623	-40.1306	-37.8418	-40.1001	-48.2178	-40.0696	-84.8389	-40.1001	-54.9316	-40.0696	-108.643	-40.1001	-53.1006	-40.1001	-38.4521	-40.1001	-46.9971	-40.1001	-43.335	-40.1001	-32.3486	-40.1001	-54.3213	-40.1001	-42.1143	-40.0696	-36.0107	-40.1001	-53.1006	-40.1306
0.0585	-29.9072	-40.1001	-23.1934	-40.0696	-23.8037	-40.1001	-31.7383	-40.1001	-27.4658	-40.1001	-29.2969	-40.1306	-32.3486	-40.1001	-65.3076	-40.1001	-60.4248	-40.1001	-111.694	-40.1306	-61.6455	-40.1306	-42.7246	-40.1306	-40.8936	-40.0696	-32.959	-40.1001	-34.1797	-40.1001	-46.9971	-40.0696	-45.166	-40.1306	-42.1143	-40.1001	-65.3076	-40.1306
0.059	-12.207	-40.0696	-21.3623	-40.1001	-16.4795	-40.1306	-29.9072	-40.1001	-26.8555	-40.1001	-30.5176	-40.1306	-27.4658	-40.1001	-64.6973	-40.0696	-48.2178	-40.1001	-93.3838	-40.1001	-39.6729	-40.1001	-30.5176	-40.0696	-37.2314	-40.0696	-40.8936	-40.1001	-34.1797	-40.1001	-54.9316	-40.1306	-48.8281	-40.1001	-46.9971	-40.0696	-58.5938	-40.0696
0.0595	-13.4277	-40.1001	-7.32422	-40.1001	-12.8174	-40.1001	-13.4277	-40.0696	-30.5176	-40.1001	-21.3623	-40.1001	-35.4004	-40.1001	-84.8389	-40.1001	-63.4766	-40.1001	-113.525	-40.1306	-42.1143	-40.1001	-50.6592	-40.0696	-31.1279	-40.1306	-44.5557	-40.1001	-40.2832	-40.1001	-29.2969	-40.1001	-48.2178	-40.1001	-32.3486	-40.1306	-52.4902	-40.1001
0.06	-14.6484	-40.1306	-11.5967	-40.1611	-26.8555	-40.1001	-25.6348	-40.1001	-27.4658	-40.1001	-24.4141	-40.1306	-33.5693	-40.1001	-79.9561	-40.0696	-58.5938	-40.1306	-115.356	-40.1306	-34.79	-40.1306	-41.5039	-40.1306	-36.6211	-40.0696	-50.0488	-40.0696	-34.1797	-40.1001	-52.4902	-40.0696	-54.3213	-40.1001	-46.9971	-40.1001	-56.1523	-40.1306
0.0605	-22.583	-40.1001	-12.8174	-40.1306	-15.8691	-40.1306	-29.9072	-40.1001	-18.9209	-40.1001	-30.5176	-40.1001	-42.1143	-40.1001	-78.7354	-40.1306	-60.4248	-40.0696	-112.915	-40.1306	-39.6729	-40.1306	-40.2832	-40.1001	-40.8936	-40.1001	-48.8281	-40.0696	-41.5039	-40.0696	-42.1143	-40.1306	-34.79	-40.0696	-38.4521	-40.1001	-59.2041	-40.1001
0.061	-20.752	-40.1001	-10.9863	-40.1306	-20.1416	-40.1001	-19.5313	-40.0696	-18.9209	-40.1001	-35.4004	-40.1001	-21.9727	-40.1001	-93.3838	-40.1001	-62.8662	-40.0696	-134.277	-40.0696	-42.7246	-40.1001	-35.4004	-40.1306	-30.5176	-40.1001	-42.1143	-40.1306	-43.335	-40.0696	-49.4385	-40.0696	-32.959	-40.1001	-39.6729	-40.0696	-49.4385	-40.1001
0.0615	-5.49316	-40.1306	-15.8691	-40.1001	-31.1279	-40.1001	-26.8555	-40.1001	-34.1797	-40.1001	-16.4795	-40.1001	-39.6729	-40.1001	-97.6563	-40.1001	-68.9697	-40.0696	-112.305	-40.1001	-41.5039	-40.1001	-36.0107	-40.1306	-45.7764	-40.1001	-52.4902	-40.1306	-30.5176	-40.1001	-29.9072	-40.0696	-48.2178	-40.0696	-43.335	-40.1001	-39.6729	-40.1001
0.062	-20.752	-40.1001	-22.583	-40.1001	-15.8691	-40.1001	-15.8691	-40.0696	-29.2969	-40.1001	-19.5313	-40.0696	-32.959	-40.1001	-96.4355	-40.1001	-93.3838	-40.0696	-109.253	-40.1306	-37.2314	-40.1001	-39.6729	-40.1001	-41.5039	-40.1001	-57.9834	-40.1001	-34.1797	-40.1001	-40.8936	-40.1001	-51.2695	-40.1001	-48.8281	-40.1001	-53.7109	-40.1001
0.0625	-9.76563	-40.1001	-17.0898	-40.1306	-31.1279	-40.1001	-14.0381	-40.1001	-25.6348	-40.1001	-32.959	-40.1001	-28.6865	-40.1306	-99.4873	-40.1001	-78.125	-40.1001	-65.3076	-40.1001	-32.3486	-40.1001	-49.4385	-40.1001	-40.8936	-40.1001	-46.3867	-40.1306	-39.0625	-40.1001	-50.0488	-40.1001	-53.1006	-40.1001	-46.3867	-40.0696	-54.9316	-40.1001
0.063	-14.6484	-40.1001	-20.752	-40.1001	-26.2451	-40.1001	-20.1416	-40.1001	-32.959	-40.0696	-26.2451	-40.1306	-38.4521	-40.1306	-84.2285	-40.1001	-90.9424	-40.1001	-109.253	-40.0696	-28.6865	-40.0696	-40.2832	-40.0696	-37.2314	-40.1001	-31.1279	-40.1306	-39.6729	-40.1001	-36.0107	-40.0696	-28.0762	-40.1001	-46.9971	-40.1001	-53.7109	-40.1001
0.0635	-6.10352	-40.1001	-14.6484	-40.1001	-32.3486	-40.1001	-6.10352	-40.1001	-35.4004	-40.1001	-20.1416	-40.0696	-21.3623	-40.0696	-113.525	-40.1001	-75.6836	-40.1001	-119.019	-40.1001	-40.2832	-40.1001	-45.166	-40.1001	-53.1006	-40.0696	-49.4385	-40.1001	-42.1143	-40.0696	-36.6211	-40.1306	-39.0625	-40.1306	-44.5557	-40.1306	-67.749	-40.1001
0.064	-9.76563	-40.1306	-20.1416	-40.1306	-12.8174	-40.1001	-18.9209	-40.1001	-29.2969	-40.1001	-30.5176	-40.1001	-48.2178	-40.1001	-86.6699	-40.1306	-83.0078	-40.1001	-119.629	-40.1001	-40.8936	-40.1001	-47.6074	-40.0696	-42.1143	-40.0696	-34.1797	-40.0696	-39.0625	-40.1306	-32.3486	-40.1306	-36.6211	-40.1001	-40.8936	-40.1001	-62.2559	-40.0696
0.0645	-8.54492	-40.1001	-20.752	-40.1001	-29.9072	-40.1001	-10.376	-40.1001	-29.9072	-40.1001	-36.6211	-40.1001	-37.8418	-40.1001	-93.3838	-40.1306	-79.3457	-40.1001	-101.318	-40.1001	-40.2832	-40.1001	-49.4385	-40.1001	-48.8281	-40.1306	-37.8418	-40.1001	-26.8555	-40.1306	-46.3867	-40.1001	-39.6729	-40.0696	-45.7764	-40.1001	-61.6455	-40.1306
0.065	-14.0381	-40.1001	-14.6484	-40.1001	-9.15527	-40.1001	-23.8037	-40.1001	-32.3486	-40.1001	-24.4141	-40.1001	-41.5039	-40.1001	-84.8389	-40.1001	-62.8662	-40.0696	-83.6182	-40.1306	-40.8936	-40.0696	-41.5039	-40.1306	-45.166	-40.1001	-32.3486	-40.1001	-36.0107	-40.1001	-43.9453	-40.1306	-41.5039	-40.1001	-45.166	-40.0696	-59.8145	-40.0696
0.0655	-20.752	-40.1001	-12.207	-40.1306	-21.9727	-40.1001	-24.4141	-40.1001	-37.8418	-40.1306	-29.2969	-40.1001	-46.3867	-40.1001	-94.6045	-40.1306	-69.5801	-40.0696	-92.7734	-40.0696	-32.3486	-40.1001	-44.5557	-40.1001	-54.3213	-40.1001	-39.0625	-40.1001	-36.6211	-40.0696	-47.6074	-40.1001	-48.8281	-40.1001	-34.79	-40.0696	-50.6592	-40.0696
0.066	-20.752	-40.0696	-16.4795	-40.0696	-24.4141	-40.1001	-12.8174	-40.0696	-38.4521	-40.1001	-44.5557	-40.1001	-42.1143	-40.1001	-92.1631	-40.0696	-67.1387	-40.1001	-95.2148	-40.1001	-35.4004	-40.1001	-29.2969	-40.0696	-44.5557	-40.1001	-36.0107	-40.1001	-36.0107	-40.1001	-42.7246	-40.0696	-28.6865	-40.1001	-45.166	-40.0696	-69.5801	-40.0696
0.0665	-23.1934	-40.1001	-10.9863	-40.0696	-17.7002	-40.0696	-21.3623	-40.1001	-28.6865	-40.1001	-25.0244	-40.1001	-45.166	-40.1001	-69.5801	-40.0696	-66.5283	-40.1001	-92.7734	-40.1306	-38.4521	-40.1001	-40.8936	-40.1001	-37.2314	-40.1306	-43.9453	-40.1001	-41.5039	-40.1001	-26.8555	-40.1001	-48.2178	-40.1001	-38.4521	-40.1001	-57.373	-40.1001
0.067	-25.6348	-40.1001	-22.583	-40.1001	-21.3623	-40.1001	-12.8174	-40.1001	-29.9072	-40.1001	-32.959	-40.1001	-44.5557	-40.1306	-56.1523	-40.1001	-69.5801	-40.1001	-108.032	-40.1001	-41.5039	-40.1001	-45.166	-40.1001	-48.8281	-40.1001	-45.7764	-40.1001	-40.8936	-40.1001	-52.4902	-40.0696	-32.3486	-40.1001	-42.1143	-40.1001	-59.8145	-40.1306
0.0675	-24.4141	-40.1001	-4.27246	-40.1001	-22.583	-40.1001	-25.6348	-40.0696	-23.8037	-40.1001	-29.2969	-40.1001	-40.2832	-40.0696	-75.6836	-40.1001	-88.501	-40.1001	-101.318	-40.1611	-42.7246	-40.1306	-41.5039	-40.0696	-39.6729	-40.0696	-45.166	-40.1001	-40.2832	-40.0696	-34.79	-40.0696	-50.0488	-40.1001	-64.6973	-40.0696	-67.749	-40.1306
0.068	-24.4141	-40.1001	-11.5967	-40.1001	-21.3623	-40.1306	-6.71387	-40.1001	-26.2451	-40.1001	-39.6729	-40.1306	-28.6865	-40.1306	-85.4492	-40.1306	-75.0732	-40.0696	-109.863	-40.1611	-50.0488	-40.1001	-25.0244	-40.1001	-36.0107	-40.0696	-32.959	-40.1001	-44.5557	-40.1001	-24.4141	-40.1001	-47.6074	-40.1001	-44.5557	-40.1001	-64.0869	-40.1306
0.0685	-27.4658	-40.1001	-8.54492	-40.1306	-14.6484	-40.1306	-12.8174	-40.1001	-36.0107	-40.1001	-43.335	-40.0696	-50.0488	-40.1001	-84.2285	-40.1001	-62.8662	-40.1306	-96.4355	-40.0696	-37.2314	-40.1001	-32.3486	-40.1001	-36.0107	-40.1001	-53.7109	-40.0696	-45.166	-40.0696	-56.1523	-40.1001	-29.9072	-40.1001	-52.4902	-40.1001	-64.0869	-40.1001
0.069	-18.3105	-40.1001	-14.6484	-40.1001	-25.6348	-40.1306	-8.54492	-40.0696	-22.583	-40.1306	-42.7246	-40.1001	-37.2314	-40.0696	-76.2939	-40.1001	-72.0215	-40.1306	-112.915	-40.0696	-46.3867	-40.1001	-36.0107	-40.0696	-34.1797	-40.1001	-54.3213	-40.1001	-42.7246	-40.1001	-54.9316	-40.1001	-48.2178	-40.0696	-54.3213	-40.1001	-59.8145	-40.0696
0.0695	-17.7002	-40.1306	-14.6484	-40.1001	-25.0244	-40.1306	-31.7383	-40.1306	-29.9072	-40.0696	-34.1797	-40.1001	-26.8555	-40.1001	-84.2285	-40.1001	-61.0352	-40.0696	-98.2666	-40.1001	-57.373	-40.1001	-39.0625	-40.0696	-28.0762	-40.1001	-49.4385	-40.1001	-43.335	-40.1306	-44.5557	-40.1001	-42.7246	-40.0696	-55.542	-40.1001	-59.8145	-40.1001
0.07	-17.0898	-40.1001	-17.7002	-40.0696	-21.9727	-40.1001	-19.5313	-40.1001	-29.2969	-40.1001	-35.4004	-40.1001	-34.79	-40.1001	-94.6045	-40.1001	-65.918	-40.1306	-81.7871	-40.1001	-42.7246	-40.0696	-60.4248	-40.0696	-40.2832	-40.1001	-43.9453	-40.0696	-36.0107	-40.1001	-61.6455	-40.1001	-52.4902	-40.1001	-47.6074	-40.1306	-54.3213	-40.1001
0.0705	-25.0244	-40.1001	-20.1416	-40.0696	-15.2588	-40.1001	-20.752	-40.0696	-24.4141	-40.0696	-34.79	-40.1001	-42.1143	-40.0696	-71.4111	-40.1001	-72.6318	-40.1001	-93.3838	-40.1001	-43.9453	-40.1001	-50.6592	-40.1001	-38.4521	-40.0696	-44.5557	-40.1001	-39.6729	-40.1001	-51.8799	-40.1001	-50.0488	-40.1001	-39.0625	-40.1001	-49.4385	-40.0696
0.071	-12.8174	-40.0696	-7.93457	-40.1001	-12.8174	-40.1001	-20.1416	-40.1306	-33.5693	-40.1001	-31.7383	-40.1306	-39.0625	-40.0696	-86.6699	-40.1001	-83.6182	-40.0696	-105.591	-40.1001	-39.6729	-40.1001	-36.0107	-40.1306	-27.4658	-40.0696	-39.6729	-40.0696	-47.6074	-40.0696	-56.1523	-40.1001	-39.0625	-40.1001	-42.7246	-40.1001	-46.9971	-40.1001
0.0715	-14.6484	-40.1001	-18.3105	-40.1001	-13.4277	-40.1001	-17.0898	-40.1001	-34.1797	-40.1001	-34.79	-40.1001	-44.5557	-40.1001	-90.9424	-40.1001	-58.5938	-40.1001	-85.4492	-40.1306	-52.4902	-40.1001	-40.2832	-40.1001	-32.959	-40.1001	-29.9072	-40.1306	-44.5557	-40.1001	-40.8936	-40.1001	-45.166	-40.1001	-51.8799	-40.1306	-45.166	-40.1306
0.072	-28.0762	-40.1001	-4.88281	-40.1001	-14.0381	-40.0696	-4.27246	-40.1001	-19.5313	-40.1306	-32.959	-40.1001	-42.7246	-40.1001	-65.918	-40.1001	-65.3076	-40.1001	-84.8389	-40.1001	-32.959	-40.0696	-37.8418	-40.1001	-40.8936	-40.0696	-30.5176	-40.1001	-39.6729	-40.0696	-52.4902	-40.1306	-40.2832	-40.0696	-42.1143	-40.0696	-50.6592	-40.1306
0.0725	-18.3105	-40.1001	-14.0381	-40.0696	-23.1934	-40.0696	-22.583	-40.1001	-21.9727	-40.0696	-32.3486	-40.1001	-49.4385	-40.1001	-58.5938	-40.1001	-39.6729	-40.1001	-78.125	-40.1001	-51.2695	-40.1306	-35.4004	-40.1306	-34.1797	-40.1001	-38.4521	-40.1001	-42.1143	-40.1001	-54.3213	-40.0696	-29.2969	-40.1001	-51.2695	-40.1306	-50.6592	-40.1306
0.073	-12.8174	-40.1001	-3.05176	-40.1001	-18.3105	-40.1001	-15.2588	-40.1001	-18.3105	-40.1001	-44.5557	-40.1001	-43.335	-40.1306	-62.2559	-40.1001	-87.2803	-40.1001	-87.2803	-40.0696	-36.6211	-40.1001	-39.6729	-40.1001	-35.4004	-40.1001	-40.2832	-40.0696	-40.2832	-40.1001	-53.1006	-40.1001	-39.0625	-40.0696	-56.1523	-40.1001	-56.1523	-40.1001
0.0735	-23.8037	-40.1001	-9.76563	-40.1001	-12.207	-40.1001	-22.583	-40.0696	-18.9209	-40.1306	-29.9072	-40.1001	-36.6211	-40.0696	-65.3076	-40.1001	-82.3975	-40.0696	-72.6318	-40.1001	-42.1143	-40.0696	-27.4658	-40.1001	-36.0107	-40.1001	-48.8281	-40.1306	-37.2314	-40.1306	-42.7246	-40.1001	-31.7383	-40.1001	-58.5938	-40.1001	-61.6455	-40.0696
0.074	-18.9209	-40.1001	-11.5967	-40.1001	-20.1416	-40.1001	-30.5176	-40.1306	-24.4141	-40.1001	-35.4004	-40.1306	-34.79	-40.1001	-55.542	-40.1001	-97.0459	-40.1001	-94.6045	-40.1001	-44.5557	-40.1001	-39.6729	-40.0696	-37.8418	-40.1306	-40.2832	-40.1306	-45.166	-40.1001	-53.1006	-40.0696	-32.959	-40.0696	-55.542	-40.1306	-51.2695	-40.1306
0.0745	-18.3105	-40.1001	-16.4795	-40.1001	-21.3623	-40.1001	-15.2588	-40.1306	-27.4658	-40.1001	-34.79	-40.0696	-55.542	-40.1001	-57.9834	-40.1001	-101.929	-40.1001	-87.2803	-40.1001	-44.5557	-40.1001	-42.1143	-40.0696	-37.2314	-40.1001	-31.7383	-40.1306	-42.1143	-40.1001	-61.0352	-40.1001	-48.8281	-40.1001	-43.335	-40.1001	-57.373	-40.1001
0.075	-15.2588	-40.1001	-20.1416	-40.1001	-12.8174	-40.1001	-3.66211	-40.1001	-23.1934	-40.1001	-42.7246	-40.0696	-48.8281	-40.1306	-59.2041	-40.1001	-97.6563	-40.1001	-93.3838	-40.1001	-53.7109	-40.1306	-44.5557	-40.1001	-39.0625	-40.1001	-41.5039	-40.1306	-39.0625	-40.1001	-51.8799	-40.1001	-41.5039	-40.1001	-41.5039	-40.1001	-60.4248	-40.1001
0.0755	-22.583	-40.1001	-16.4795	-40.1306	-21.9727	-40.0696	-14.6484	-40.1001	-23.1934	-40.1001	-25.6348	-40.1306	-54.9316	-40.1001	-56.7627	-40.0696	-65.918	-40.1001	-76.9043	-40.1001	-53.7109	-40.1001	-47.6074	-40.1001	-25.0244	-40.1001	-37.2314	-40.0696	-31.1279	-40.1001	-46.9971	-40.1001	-36.6211	-40.0696	-62.8662	-40.1001	-70.8008	-40.1001
0.076	-23.1934	-40.1001	-34.1797	-40.1306	-12.8174	-40.1001	-25.0244	-40.1001	-30.5176	-40.0696	-23.1934	-40.1001	-52.4902	-40.1001	-65.3076	-40.1001	-68.9697	-40.1306	-75.0732	-40.1001	-43.9453	-40.1306	-48.2178	-40.1001	-38.4521	-40.0696	-51.2695	-40.1001	-40.2832	-40.1001	-51.2695	-40.1001	-31.7383	-40.1001	-50.6592	-40.1001	-68.9697	-40.1001
0.0765	-15.8691	-40.1306	-13.4277	-40.1001	-14.6484	-40.1001	-18.3105	-40.1001	-23.1934	-40.1001	-20.752	-40.1001	-56.1523	-40.1001	-61.0352	-40.1306	-62.8662	-40.0696	-75.6836	-40.0696	-42.1143	-40.1001	-36.6211	-40.1001	-28.6865	-40.1001	-41.5039	-40.1001	-31.1279	-40.1001	-51.2695	-40.1306	-28.6865	-40.1001	-44.5557	-40.1001	-65.918	-40.1001
0.077	-23.8037	-40.1001	-12.8174	-40.1306	-15.8691	-40.1306	-17.0898	-40.0696	-30.5176	-40.1001	-36.6211	-40.1001	-32.3486	-40.1001	-87.2803	-40.0696	-72.6318	-40.1001	-96.4355	-40.1001	-54.9316	-40.1001	-53.7109	-40.1306	-29.2969	-40.1001	-35.4004	-40.1001	-34.79	-40.1001	-55.542	-40.1001	-34.79	-40.1001	-48.2178	-40.1001	-58.5938	-40.1001
0.0775	-23.1934	-40.0696	-17.0898	-40.0696	-12.8174	-40.1001	-29.2969	-40.1001	-34.79	-40.1001	-25.6348	-40.0696	-43.335	-40.1001	-70.1904	-40.1306	-75.6836	-40.0696	-92.1631	-40.1001	-31.1279	-40.1001	-46.9971	-40.1001	-23.8037	-40.1001	-48.2178	-40.1001	-35.4004	-40.1001	-53.7109	-40.1001	-48.2178	-40.1001	-39.0625	-40.1001	-37.2314	-40.1001
0.078	-15.2588	-40.1001	-13.4277	-40.1001	-7.93457	-40.1306	-22.583	-40.1001	-27.4658	-40.1001	-29.9072	-40.1001	-32.3486	-40.1001	-59.2041	-40.1001	-54.3213	-40.0696	-85.4492	-40.1001	-35.4004	-40.1001	-41.5039	-40.1001	-40.2832	-40.1001	-33.5693	-40.0696	-46.3867	-40.1001	-29.2969	-40.1001	-40.8936	-40.1001	-52.4902	-40.1001	-54.9316	-40.1001
0.0785	-17.7002	-40.1001	-25.6348	-40.1001	-12.8174	-40.0696	-24.4141	-40.1001	-27.4658	-40.0696	-37.2314	-40.1001	-50.0488	-40.0696	-100.708	-40.1001	-70.1904	-40.1001	-84.2285	-40.0696	-51.8799	-40.1001	-36.6211	-40.1001	-31.7383	-40.1306	-51.8799	-40.0696	-24.4141	-40.1001	-47.6074	-40.0696	-42.1143	-40.1001	-33.5693	-40.1001	-56.1523	-40.1001
0.079	-0.610352	-40.0696	-10.9863	-40.1001	-6.71387	-40.1306	-14.0381	-40.1306	-23.8037	-40.1001	-23.8037	-40.1001	-41.5039	-40.1306	-93.9941	-40.1001	-61.6455	-40.1001	-93.3838	-40.1001	-37.8418	-40.1306	-43.9453	-40.1001	-29.9072	-40.0696	-36.0107	-40.1001	-34.79	-40.0696	-44.5557	-40.1001	-46.3867	-40.1306	-49.4385	-40.1001	-51.2695	-40.1306
0.0795	-14.0381	-40.1001	-3.66211	-40.1001	-19.5313	-40.1306	-6.10352	-40.1306	-15.2588	-40.0696	-33.5693	-40.1001	-43.9453	-40.1306	-86.6699	-40.1001	-74.4629	-40.1001	-100.098	-40.1001	-40.2832	-40.0696	-34.79	-40.1306	-17.7002	-40.1001	-28.0762	-40.1001	-29.2969	-40.0391	-34.1797	-40.1001	-46.9971	-40.1306	-42.7246	-40.1001	-40.2832	-40.1001
0.08	-17.0898	-40.1001	-6.71387	-40.1001	-17.7002	-40.0696	-23.8037	-40.1306	-27.4658	-40.1001	-30.5176	-40.1306	-39.6729	-40.1001	-59.2041	-40.0696	-45.7764	-40.1001	-76.9043	-40.1001	-45.166	-40.0696	-41.5039	-40.1306	-33.5693	-40.1001	-48.2178	-40.1001	-26.8555	-40.1001	-45.166	-40.1001	-46.3867	-40.1001	-33.5693	-40.1001	-53.1006	-40.1001
0.0805	-25.6348	-40.1001	-18.3105	-40.1001	-9.76563	-40.1001	-17.0898	-40.1306	-34.1797	-40.0696	-25.6348	-40.1306	-39.0625	-40.1001	-57.373	-40.0696	-60.4248	-40.1001	-76.2939	-40.0696	-42.7246	-40.1001	-32.959	-40.1001	-36.6211	-40.1001	-32.959	-40.1001	-28.0762	-40.1001	-36.6211	-40.1001	-43.9453	-40.0696	-40.8936	-40.1001	-73.8525	-40.1001
0.081	-4.27246	-40.1001	-21.9727	-40.1306	-20.1416	-40.1306	-25.6348	-40.1001	-34.1797	-40.0696	-27.4658	-40.0696	-48.2178	-40.1001	-83.0078	-40.1001	-46.3867	-40.1306	-72.0215	-40.1001	-29.2969	-40.1001	-39.6729	-40.1001	-30.5176	-40.1001	-46.9971	-40.1306	-28.6865	-40.1306	-39.0625	-40.1001	-34.79	-40.1001	-42.1143	-40.0696	-65.918	-40.1001
0.0815	-10.9863	-40.1001	-6.10352	-40.1001	-24.4141	-40.1001	-17.0898	-40.1001	-28.6865	-40.1001	-32.3486	-40.1306	-46.3867	-40.1001	-96.4355	-40.1001	-49.4385	-40.1001	-59.2041	-40.0696	-45.166	-40.1001	-40.2832	-40.0696	-31.1279	-40.0696	-54.3213	-40.1001	-44.5557	-40.0696	-42.1143	-40.1001	-37.8418	-40.1001	-40.8936	-40.0696	-53.1006	-40.1001
0.082	-3.66211	-40.1001	-18.3105	-40.1001	-12.207	-40.1001	-17.7002	-40.1001	-25.0244	-40.1001	-23.1934	-40.1001	-43.9453	-40.1306	-104.98	-40.1306	-40.8936	-40.1001	-74.4629	-40.0696	-36.6211	-40.1001	-44.5557	-40.0696	-25.0244	-40.1001	-37.8418	-40.1001	-22.583	-40.1001	-35.4004	-40.0696	-40.2832	-40.1001	-43.335	-40.1001	-51.8799	-40.1306
0.0825	-18.3105	-40.0696	-26.2451	-40.1001	-12.207	-40.1306	-18.9209	-40.1001	-15.8691	-40.1001	-13.4277	-40.0696	-58.5938	-40.1306	-106.812	-40.1001	-54.3213	-40.0696	-76.2939	-40.1001	-47.6074	-40.1001	-36.6211	-40.1306	-27.4658	-40.1001	-41.5039	-40.1306	-34.1797	-40.1001	-46.9971	-40.1001	-48.8281	-40.1001	-42.1143	-40.1001	-59.2041	-40.1001
0.083	-17.7002	-40.1306	-18.3105	-40.1001	-28.0762	-40.0696	-16.4795	-40.1001	-18.9209	-40.1001	-27.4658	-40.1001	-41.5039	-40.1001	-76.9043	-40.1001	-47.6074	-40.1306	-76.2939	-40.1001	-33.5693	-40.0696	-43.9453	-40.0696	-37.8418	-40.1306	-39.0625	-40.1306	-45.7764	-40.0696	-42.7246	-40.0696	-43.9453	-40.1001	-39.6729	-40.1001	-48.8281	-40.1306
0.0835	-10.9863	-40.1001	-20.752	-40.1306	-20.1416	-40.1001	-18.9209	-40.1001	-24.4141	-40.0696	-28.0762	-40.1001	-42.1143	-40.1001	-100.098	-40.1001	-59.2041	-40.1001	-64.6973	-40.1001	-37.8418	-40.1001	-26.2451	-40.1001	-21.9727	-40.1306	-27.4658	-40.1001	-45.166	-40.1306	-44.5557	-40.1001	-52.4902	-40.1001	-43.335	-40.1001	-53.7109	-40.1001
0.084	-17.0898	-40.1001	-21.3623	-40.1001	-14.6484	-40.0696	-7.93457	-40.1001	-26.8555	-40.1001	-28.6865	-40.0696	-34.1797	-40.1001	-113.525	-40.1001	-46.9971	-40.1001	-74.4629	-40.1001	-42.1143	-40.1306	-44.5557	-40.1001	-28.0762	-40.1001	-35.4004	-40.1001	-39.6729	-40.1001	-38.4521	-40.0696	-42.7246	-40.1001	-48.8281	-40.1001	-53.7109	-40.1001
0.0845	-22.583	-40.1001	-21.9727	-40.0696	-22.583	-40.1001	-25.6348	-40.1306	-20.1416	-40.1001	-32.959	-40.1001	-39.0625	-40.1306	-82.3975	-40.1001	-51.8799	-40.1001	-67.749	-40.1001	-48.8281	-40.1001	-37.8418	-40.1001	-39.6729	-40.1306	-30.5176	-40.1306	-41.5039	-40.1001	-39.0625	-40.1306	-34.79	-40.1001	-25.0244	-40.1001	-57.9834	-40.0696
0.085	-8.54492	-40.1306	-17.0898	-40.1001	-7.93457	-40.1306	-14.6484	-40.1001	-18.9209	-40.1306	-29.9072	-40.1001	-45.166	-40.1001	-81.7871	-40.1306	-57.9834	-40.1306	-70.1904	-40.1001	-43.9453	-40.1001	-43.335	-40.0696	-41.5039	-40.1306	-33.5693	-40.0696	-40.2832	-40.1001	-35.4004	-40.1001	-47.6074	-40.1001	-45.7764	-40.1001	-46.3867	-40.0696
0.0855	-23.8037	-40.1001	-18.3105	-40.1001	-29.2969	-40.1001	-20.1416	-40.0696	-13.4277	-40.1001	-21.3623	-40.1001	-29.9072	-40.1001	-88.501	-40.1001	-45.7764	-40.1001	-68.9697	-40.0696	-35.4004	-40.1001	-35.4004	-40.1001	-26.2451	-40.1001	-40.8936	-40.1001	-38.4521	-40.1001	-36.0107	-40.1001	-41.5039	-40.1001	-48.2178	-40.1001	-50.0488	-40.1001
0.086	-16.4795	-40.1001	-6.10352	-40.0696	-19.5313	-40.1001	-21.3623	-40.1001	-20.1416	-40.1001	-23.8037	-40.1001	-46.3867	-40.1306	-75.0732	-40.1306	-50.0488	-40.1001	-78.125	-40.1001	-27.4658	-40.1001	-35.4004	-40.0696	-39.6729	-40.1001	-44.5557	-40.1001	-48.2178	-40.1001	-37.2314	-40.1001	-54.9316	-40.1001	-36.0107	-40.1001	-54.3213	-40.0696
0.0865	-20.752	-40.1001	-13.4277	-40.1306	-23.8037	-40.1001	-20.1416	-40.1001	-21.9727	-40.1001	-18.9209	-40.1001	-43.9453	-40.1001	-76.2939	-40.1306	-52.4902	-40.1001	-85.4492	-40.1306	-40.2832	-40.0696	-45.7764	-40.0696	-46.9971	-40.1001	-31.7383	-40.1306	-55.542	-40.1001	-34.1797	-40.0696	-42.7246	-40.1001	-36.6211	-40.1001	-42.1143	-40.1001
0.087	-13.4277	-40.0696	-12.207	-40.1001	-25.6348	-40.1001	-14.6484	-40.1001	-20.1416	-40.1001	-29.9072	-40.1001	-50.6592	-40.1001	-80.5664	-40.1001	-45.166	-40.1001	-87.2803	-40.1001	-43.9453	-40.1001	-39.0625	-40.1306	-37.8418	-40.1001	-48.8281	-40.1001	-35.4004	-40.0696	-36.6211	-40.1001	-64.6973	-40.1001	-37.8418	-40.1001	-47.6074	-40.1001
0.0875	-20.1416	-40.1001	-9.76563	-40.0696	-15.2588	-40.1001	-8.54492	-40.1001	-22.583	-40.1001	-32.959	-40.1001	-53.7109	-40.1001	-105.591	-40.1001	-47.6074	-40.1001	-76.2939	-40.1001	-36.0107	-40.0696	-38.4521	-40.1306	-32.959	-40.1001	-36.6211	-40.0696	-36.6211	-40.1001	-46.9971	-40.1306	-48.8281	-40.1306	-53.7109	-40.1001	-64.6973	-40.1001
0.088	-12.207	-40.1306	-7.32422	-40.1001	-35.4004	-40.1001	-15.8691	-40.0696	-23.1934	-40.0696	-33.5693	-40.1001	-38.4521	-40.1001	-68.3594	-40.0696	-69.5801	-40.1001	-77.5146	-40.1001	-30.5176	-40.1001	-38.4521	-40.1001	-40.2832	-40.1001	-32.959	-40.1001	-55.542	-40.1001	-40.2832	-40.1001	-50.0488	-40.0696	-39.0625	-40.1001	-56.1523	-40.0696
0.0885	-26.2451	-40.1001	-14.6484	-40.1001	-15.2588	-40.1001	-21.3623	-40.1001	-25.0244	-40.0696	-32.959	-40.1001	-43.335	-40.0696	-106.201	-40.1306	-67.749	-40.1306	-73.2422	-40.1306	-49.4385	-40.1001	-45.7764	-40.0696	-31.7383	-40.0696	-40.2832	-40.0696	-48.2178	-40.1306	-45.7764	-40.1001	-40.8936	-40.1001	-56.7627	-40.1001	-57.9834	-40.0696
0.089	-20.752	-40.1611	-10.376	-40.1001	-20.752	-40.0696	-17.0898	-40.0696	-18.3105	-40.1306	-35.4004	-40.1001	-36.6211	-40.0696	-90.9424	-40.1001	-51.8799	-40.0696	-76.2939	-40.1001	-44.5557	-40.1001	-41.5039	-40.1001	-45.166	-40.1001	-37.8418	-40.1306	-31.7383	-40.1001	-53.7109	-40.1001	-46.9971	-40.1001	-53.1006	-40.1001	-70.1904	-40.0696
0.0895	-12.8174	-40.1001	-7.32422	-40.0696	-25.0244	-40.1001	-7.93457	-40.0696	-20.1416	-40.1001	-40.2832	-40.1306	-21.3623	-40.0696	-98.2666	-40.1306	-45.166	-40.1001	-84.2285	-40.0696	-37.8418	-40.1001	-36.0107	-40.1001	-45.166	-40.1306	-35.4004	-40.0696	-38.4521	-40.1001	-43.335	-40.1001	-35.4004	-40.1001	-53.1006	-40.0696	-76.9043	-40.1001
0.09	-25.0244	-40.1001	-15.8691	-40.1001	-29.2969	-40.1001	-14.6484	-40.1001	-21.9727	-40.1001	-41.5039	-40.1001	-38.4521	-40.1001	-97.6563	-40.1001	-34.1797	-40.1001	-63.4766	-40.1001	-40.2832	-40.1001	-34.1797	-40.0696	-31.1279	-40.1306	-40.2832	-40.1001	-37.2314	-40.1306	-55.542	-40.1001	-46.3867	-40.1001	-43.9453	-40.1001	-70.8008	-40.1001
0.0905	-28.6865	-40.1001	-18.9209	-40.1001	-8.54492	-40.1001	-21.9727	-40.1001	-17.0898	-40.1306	-29.9072	-40.1001	-40.2832	-40.1306	-101.318	-40.1001	-50.6592	-40.0696	-63.4766	-40.0696	-37.8418	-40.0696	-42.7246	-40.1001	-45.7764	-40.1001	-29.9072	-40.1001	-40.8936	-40.0696	-41.5039	-40.1001	-50.6592	-40.1001	-43.335	-40.1001	-72.6318	-40.1001
0.091	-30.5176	-40.1001	0	-40.1001	-9.15527	-40.0696	-28.0762	-40.1001	-28.0762	-40.1001	-30.5176	-40.1001	-48.8281	-40.1001	-98.2666	-40.1001	-42.7246	-40.1001	-62.2559	-40.1001	-36.6211	-40.1001	-42.1143	-40.1001	-38.4521	-40.1001	-32.3486	-40.1001	-40.8936	-40.1001	-35.4004	-40.1001	-48.8281	-40.1306	-39.6729	-40.1001	-51.8799	-40.1306
0.0915	-32.3486	-40.0696	-15.2588	-40.1001	-23.1934	-40.0696	-14.6484	-40.1001	-15.2588	-40.1001	-30.5176	-40.0696	-43.9453	-40.1001	-126.953	-40.1001	-54.3213	-40.1001	-67.1387	-40.1001	-36.0107	-40.1306	-34.79	-40.1306	-39.6729	-40.1001	-34.79	-40.1001	-35.4004	-40.1001	-50.0488	-40.0696	-46.3867	-40.1306	-51.8799	-40.1001	-55.542	-40.1306
0.092	-23.8037	-40.1001	-6.10352	-40.0696	-15.8691	-40.1001	-17.0898	-40.1001	-14.0381	-40.1001	-31.7383	-40.1001	-53.1006	-40.0696	-112.305	-40.1001	-45.7764	-40.1001	-88.501	-40.0696	-33.5693	-40.1001	-32.3486	-40.0696	-36.0107	-40.1001	-35.4004	-40.1001	-41.5039	-40.1001	-46.3867	-40.1001	-42.1143	-40.1306	-46.3867	-40.1306	-63.4766	-40.1001
0.0925	-22.583	-40.1611	-12.8174	-40.1001	-19.5313	-40.0696	-27.4658	-40.0696	-19.5313	-40.1001	-34.1797	-40.1001	-34.79	-40.1001	-79.9561	-40.0696	-42.7246	-40.1001	-92.7734	-40.1001	-33.5693	-40.1001	-48.2178	-40.1001	-18.9209	-40.1001	-43.335	-40.1001	-49.4385	-40.1306	-51.2695	-40.0696	-45.166	-40.1001	-48.2178	-40.1001	-61.0352	-40.0696
0.093	-26.2451	-40.1001	-2.44141	-40.1001	-21.9727	-40.0696	-16.4795	-40.0696	-14.0381	-40.0696	-26.8555	-40.1001	-46.3867	-40.0696	-110.474	-40.1001	-46.3867	-40.1306	-83.0078	-40.1001	-42.7246	-40.0696	-39.0625	-40.0696	-41.5039	-40.1001	-38.4521	-40.0696	-39.6729	-40.1001	-49.4385	-40.0696	-53.1006	-40.0696	-48.8281	-40.1001	-73.2422	-40.1001
0.0935	-28.6865	-40.1001	-10.376	-40.1001	-10.376	-40.1001	-17.7002	-40.1001	-9.76563	-40.1001	-31.1279	-40.1001	-27.4658	-40.1001	-98.877	-40.1001	-56.7627	-40.1001	-78.7354	-40.1306	-32.959	-40.1306	-46.3867	-40.1001	-30.5176	-40.1001	-51.8799	-40.1306	-29.2969	-40.0696	-49.4385	-40.1001	-39.0625	-40.1306	-50.6592	-40.1001	-60.4248	-40.1306
0.094	-30.5176	-40.1001	-19.5313	-40.1001	-25.0244	-40.1001	-10.9863	-40.1001	-12.8174	-40.1001	-31.1279	-40.1001	-50.6592	-40.1306	-100.708	-40.0696	-44.5557	-40.1001	-54.9316	-40.0696	-39.0625	-40.1001	-43.9453	-40.0696	-32.959	-40.1306	-35.4004	-40.1306	-37.8418	-40.0696	-47.6074	-40.0696	-54.3213	-40.1001	-50.6592	-40.1001	-49.4385	-40.0696
0.0945	-25.0244	-40.1001	-0.610352	-40.1306	-18.3105	-40.0696	-36.0107	-40.0696	-23.1934	-40.0696	-22.583	-40.1001	-43.335	-40.1001	-97.0459	-40.1306	-43.9453	-40.1001	-89.7217	-40.0696	-39.0625	-40.1001	-37.2314	-40.0696	-38.4521	-40.1001	-29.2969	-40.1306	-23.1934	-40.1001	-43.9453	-40.1001	-39.6729	-40.1001	-46.9971	-40.1306	-52.4902	-40.1306
0.095	-37.8418	-40.1001	-15.2588	-40.1001	-4.27246	-40.1001	-12.8174	-40.1001	-22.583	-40.0696	-29.9072	-40.1001	-37.8418	-40.1001	-112.915	-40.1306	-40.2832	-40.1001	-75.0732	-40.1306	-34.1797	-40.1306	-34.79	-40.1001	-46.9971	-40.1001	-42.7246	-40.1001	-37.2314	-40.0696	-42.1143	-40.1001	-43.335	-40.1306	-56.1523	-40.1001	-60.4248	-40.1306
0.0955	-31.7383	-40.1001	-13.4277	-40.1001	-14.6484	-40.0696	-29.9072	-40.1001	-25.6348	-40.1306	-36.0107	-40.1001	-52.4902	-40.1001	-69.5801	-40.0696	-42.1143	-40.1001	-71.4111	-40.1001	-30.5176	-40.1001	-35.4004	-40.1001	-31.7383	-40.1001	-53.1006	-40.1306	-39.6729	-40.1001	-51.8799	-40.1001	-35.4004	-40.1001	-54.9316	-40.1001	-59.8145	-40.1001
0.096	-39.0625	-40.1306	-9.15527	-40.1306	-14.0381	-40.0696	-10.9863	-40.0696	-2.44141	-40.1001	-31.1279	-40.1001	-49.4385	-40.0696	-59.2041	-40.0696	-45.7764	-40.1611	-86.0596	-40.1001	-19.5313	-40.1001	-35.4004	-40.1001	-37.8418	-40.1001	-33.5693	-40.1001	-44.5557	-40.1001	-44.5557	-40.1001	-27.4658	-40.1001	-48.2178	-40.1306	-64.6973	-40.1306
0.0965	-25.6348	-40.1611	-8.54492	-40.0696	-18.9209	-40.1306	-15.8691	-40.1306	-6.71387	-40.0696	-7.32422	-40.1001	-55.542	-40.1001	-90.332	-40.1001	-26.8555	-40.1001	-78.125	-40.1306	-37.2314	-40.1306	-31.7383	-40.1001	-26.2451	-40.1001	-37.2314	-40.1001	-48.8281	-40.1001	-50.6592	-40.1001	-31.7383	-40.0696	-47.6074	-40.1001	-49.4385	-40.0696
0.097	-26.8555	-40.1001	-20.1416	-40.1001	-14.0381	-40.1001	-10.376	-40.1001	-22.583	-40.1001	-25.0244	-40.0696	-40.2832	-40.0696	-104.98	-40.1001	-42.1143	-40.1001	-81.7871	-40.1001	-20.1416	-40.0391	-52.4902	-40.1001	-30.5176	-40.1001	-46.3867	-40.1001	-41.5039	-40.1001	-50.6592	-40.1001	-29.2969	-40.1001	-51.2695	-40.1001	-53.1006	-40.0696
0.0975	-28.6865	-40.1306	-10.376	-40.1001	-7.93457	-40.1001	-25.6348	-40.0696	-23.1934	-40.1001	-21.3623	-40.1306	-39.6729	-40.1306	-101.929	-40.0696	-52.4902	-40.1306	-72.6318	-40.0696	-34.79	-40.1001	-36.6211	-40.1001	-29.9072	-40.1001	-38.4521	-40.1001	-33.5693	-40.0696	-42.1143	-40.0696	-57.9834	-40.1001	-45.7764	-40.1001	-56.7627	-40.0696
0.098	-11.5967	-40.1306	-25.6348	-40.1001	-26.8555	-40.0696	-28.6865	-40.1306	-25.0244	-40.0696	-29.9072	-40.1001	-33.5693	-40.0696	-94.6045	-40.0696	-43.9453	-40.1001	-67.1387	-40.1001	-22.583	-40.1001	-45.7764	-40.1001	-36.6211	-40.1001	-38.4521	-40.1001	-43.9453	-40.1001	-33.5693	-40.0696	-45.166	-40.0696	-32.959	-40.1001	-52.4902	-40.1001
0.0985	-21.3623	-40.1001	-23.1934	-40.0696	-31.7383	-40.1306	-9.76563	-40.0696	-20.752	-40.1306	-32.3486	-40.0696	-50.6592	-40.0696	-70.1904	-40.0696	-40.2832	-40.1001	-70.8008	-40.1001	-34.1797	-40.0696	-45.7764	-40.1001	-39.0625	-40.0696	-39.6729	-40.1001	-34.79	-40.1001	-59.2041	-40.1001	-50.0488	-40.1001	-42.1143	-40.1001	-54.3213	-40.1306
0.099	-10.9863	-40.1001	-23.1934	-40.1001	-20.752	-40.1001	-15.8691	-40.1001	-25.0244	-40.1001	-22.583	-40.0696	-32.3486	-40.1001	-80.5664	-40.1001	-32.959	-40.1001	-86.0596	-40.1001	-32.959	-40.1001	-46.3867	-40.1306	-36.6211	-40.1001	-44.5557	-40.1001	-36.0107	-40.1001	-37.2314	-40.0696	-40.8936	-40.1306	-50.0488	-40.1306	-48.2178	-40.0696
0.0995	-20.752	-40.1306	-23.8037	-40.1001	-25.6348	-40.1001	-13.4277	-40.1001	-38.4521	-40.1001	-33.5693	-40.1001	-40.8936	-40.1001	-85.4492	-40.1001	-33.5693	-40.1001	-85.4492	-40.1001	-25.0244	-40.1001	-50.6592	-40.1001	-33.5693	-40.0696	-44.5557	-40.1306	-28.0762	-40.1001	-37.8418	-40.1001	-38.4521	-40.1001	-53.7109	-40.1001	-45.166	-40.1001
0.1	-19.5313	-40.1001	-15.8691	-40.1001	-24.4141	-40.1001	-28.6865	-40.1306	-27.4658	-40.1001	-34.79	-40.1001	-54.3213	-40.1001	-104.98	-40.1001	-29.2969	-40.1001	-76.2939	-40.1306	-17.7002	-40.0696	-53.1006	-40.1001	-28.6865	-40.1001	-31.7383	-40.1306	-31.1279	-40.1001	-32.959	-40.1001	-39.6729	-40.0696	-37.8418	-40.1001	-56.7627	-40.1001
0.1005	-14.6484	-40.1001	-10.9863	-40.1306	-13.4277	-40.1001	-17.0898	-40.1001	-14.6484	-40.1001	-27.4658	-40.0696	-46.9971	-40.0696	-76.2939	-40.0696	-28.0762	-40.1001	-74.4629	-40.1306	-20.1416	-40.1001	-45.166	-40.1001	-39.0625	-40.1306	-48.2178	-40.1001	-40.8936	-40.1001	-40.2832	-40.1001	-59.2041	-40.0696	-39.0625	-40.1001	-56.1523	-40.1001
0.101	-9.76563	-40.0696	-25.6348	-40.1001	-7.32422	-40.0696	-14.0381	-40.0696	-17.0898	-40.0696	-28.6865	-40.1306	-36.0107	-40.1001	-50.6592	-40.1001	-39.6729	-40.1001	-79.3457	-40.0696	-37.2314	-40.1306	-48.2178	-40.1001	-52.4902	-40.0696	-42.7246	-40.0696	-29.9072	-40.1001	-42.7246	-40.1001	-45.7764	-40.0696	-47.6074	-40.0696	-57.373	-40.1001
0.1015	-13.4277	-40.1306	-9.76563	-40.1001	-13.4277	-40.1001	-23.1934	-40.0696	-20.752	-40.1001	-23.8037	-40.1001	-38.4521	-40.0696	-76.9043	-40.1306	-49.4385	-40.1306	-86.6699	-40.1001	-38.4521	-40.1001	-42.7246	-40.1001	-41.5039	-40.1001	-49.4385	-40.1306	-33.5693	-40.1611	-43.335	-40.1001	-48.8281	-40.1306	-42.1143	-40.1001	-49.4385	-40.0696
0.102	-17.7002	-40.1306	-10.9863	-40.1001	-15.8691	-40.0696	-26.2451	-40.1306	-20.1416	-40.1306	-30.5176	-40.1001	-32.3486	-40.1001	-69.5801	-40.1001	-40.8936	-40.1306	-80.5664	-40.1001	-34.1797	-40.1001	-39.6729	-40.0696	-15.2588	-40.1001	-28.6865	-40.1306	-35.4004	-40.0696	-52.4902	-40.1001	-55.542	-40.1001	-36.0107	-40.1001	-62.8662	-40.1001
0.1025	-17.7002	-40.0696	-30.5176	-40.1306	-20.1416	-40.1001	-16.4795	-40.0696	-21.9727	-40.1001	-29.9072	-40.0696	-40.2832	-40.1001	-92.7734	-40.1306	-51.8799	-40.1001	-67.1387	-40.1001	-36.0107	-40.1001	-56.1523	-40.1001	-36.6211	-40.1001	-53.1006	-40.1001	-29.2969	-40.1001	-40.8936	-40.0391	-42.1143	-40.1001	-37.2314	-40.1306	-59.8145	-40.1306
0.103	-16.4795	-40.0696	-16.4795	-40.1001	-21.9727	-40.1001	-18.9209	-40.1306	-33.5693	-40.1001	-40.2832	-40.1001	-42.7246	-40.1001	-87.2803	-40.1001	-39.6729	-40.1001	-82.3975	-40.1306	-32.959	-40.1001	-50.6592	-40.1306	-30.5176	-40.1001	-32.959	-40.1306	-37.2314	-40.0696	-31.7383	-40.1001	-39.0625	-40.1001	-46.3867	-40.1611	-43.335	-40.1001
0.1035	-13.4277	-40.1306	-20.1416	-40.1001	-18.3105	-40.1001	-12.8174	-40.1001	-18.9209	-40.1001	-21.9727	-40.0696	-31.1279	-40.1001	-67.1387	-40.0696	-36.6211	-40.1306	-76.2939	-40.1001	-31.1279	-40.1001	-44.5557	-40.0696	-35.4004	-40.1001	-29.2969	-40.0696	-45.7764	-40.1001	-38.4521	-40.1306	-40.8936	-40.1001	-48.2178	-40.1001	-50.6592	-40.1306
0.104	-23.1934	-40.0696	-7.93457	-40.1001	-10.376	-40.0696	-10.9863	-40.1001	-32.3486	-40.1001	-23.1934	-40.0696	-45.166	-40.1306	-67.1387	-40.1001	-34.1797	-40.1001	-80.5664	-40.1001	-13.4277	-40.1001	-51.2695	-40.1001	-21.3623	-40.1001	-36.0107	-40.1001	-40.2832	-40.1001	-38.4521	-40.1001	-53.1006	-40.1001	-48.8281	-40.1001	-45.166	-40.1306
0.1045	-7.32422	-40.1001	-10.376	-40.1306	-17.0898	-40.1001	-18.9209	-40.1001	-24.4141	-40.1306	-26.2451	-40.0696	-37.2314	-40.1001	-76.9043	-40.1306	-35.4004	-40.1001	-86.6699	-40.1306	-29.9072	-40.1001	-59.2041	-40.1001	-33.5693	-40.1001	-32.959	-40.0391	-42.7246	-40.1306	-39.0625	-40.1001	-60.4248	-40.1001	-46.3867	-40.1001	-49.4385	-40.1001
0.105	-13.4277	-40.1611	-13.4277	-40.1306	-20.1416	-40.1001	-9.15527	-40.1001	-19.5313	-40.1001	-18.9209	-40.1001	-45.166	-40.1001	-79.9561	-40.0696	-46.9971	-40.1001	-86.6699	-40.1001	-20.1416	-40.1001	-37.2314	-40.1001	-50.6592	-40.1001	-50.6592	-40.1001	-37.2314	-40.1306	-34.1797	-40.1001	-49.4385	-40.1001	-36.6211	-40.0696	-52.4902	-40.0696
0.1055	-15.2588	-40.1306	-12.8174	-40.1001	-13.4277	-40.1001	-16.4795	-40.1001	-12.8174	-40.1001	-32.959	-40.1001	-48.2178	-40.0696	-89.1113	-40.1001	-34.79	-40.1001	-72.0215	-40.1306	-30.5176	-40.1001	-45.166	-40.1001	-39.0625	-40.1306	-26.2451	-40.0696	-34.79	-40.1001	-40.8936	-40.0696	-49.4385	-40.1001	-53.1006	-40.1001	-50.6592	-40.1001
0.106	-11.5967	-40.0696	-3.05176	-40.0696	-23.1934	-40.1001	-12.207	-40.1001	-20.1416	-40.1306	-26.8555	-40.1001	-50.0488	-40.1001	-70.1904	-40.1001	-40.2832	-40.0696	-86.0596	-40.1306	-24.4141	-40.1306	-50.6592	-40.1001	-28.6865	-40.1001	-30.5176	-40.1001	-37.2314	-40.1001	-44.5557	-40.0696	-40.8936	-40.1001	-40.2832	-40.1001	-49.4385	-40.1306
0.1065	-11.5967	-40.1306	-19.5313	-40.1001	-22.583	-40.1306	-4.88281	-40.0696	-23.1934	-40.1001	-29.9072	-40.1001	-28.0762	-40.1001	-70.8008	-40.1001	-48.2178	-40.0696	-72.6318	-40.1001	-27.4658	-40.1001	-43.9453	-40.1001	-39.0625	-40.1001	-30.5176	-40.0696	-34.79	-40.1001	-43.335	-40.1001	-36.0107	-40.1001	-43.335	-40.1001	-61.6455	-40.1001
0.107	-15.8691	-40.1001	-6.10352	-40.1001	-34.79	-40.1001	-8.54492	-40.0696	-31.7383	-40.0696	-39.0625	-40.1001	-60.4248	-40.1001	-75.0732	-40.1001	-43.9453	-40.1001	-67.749	-40.1001	-29.2969	-40.1001	-30.5176	-40.1001	-32.959	-40.0696	-20.752	-40.1001	-42.1143	-40.1001	-45.166	-40.0696	-41.5039	-40.0696	-40.2832	-40.1001	-51.2695	-40.1001
0.1075	-35.4004	-40.0696	4.27246	-40.1306	-13.4277	-40.1001	-24.4141	-40.1001	-18.3105	-40.1001	-29.9072	-40.1306	-40.2832	-40.1001	-82.3975	-40.1306	-34.79	-40.1001	-86.6699	-40.1306	-20.1416	-40.1001	-38.4521	-40.1306	-31.1279	-40.1001	-37.2314	-40.1306	-29.9072	-40.1001	-42.1143	-40.1001	-32.3486	-40.1001	-45.7764	-40.1306	-53.1006	-40.0696
0.108	-27.4658	-40.1306	-7.32422	-40.0696	-26.2451	-40.1001	-21.3623	-40.1306	-12.207	-40.1306	-26.2451	-40.1001	-44.5557	-40.1001	-91.5527	-40.0696	-40.8936	-40.1001	-69.5801	-40.1001	-29.2969	-40.1001	-42.1143	-40.1001	-37.2314	-40.1001	-36.6211	-40.0696	-37.2314	-40.1306	-53.1006	-40.1001	-42.1143	-40.1001	-45.7764	-40.1001	-52.4902	-40.0696
0.1085	-17.7002	-40.1001	-12.207	-40.0696	-26.8555	-40.1001	-15.8691	-40.0391	-12.207	-40.1001	-29.2969	-40.1001	-36.6211	-40.0696	-100.098	-40.1001	-47.6074	-40.1306	-100.098	-40.1001	-35.4004	-40.1001	-43.9453	-40.1001	-38.4521	-40.1001	-39.0625	-40.1001	-32.959	-40.1001	-48.8281	-40.1001	-29.9072	-40.0696	-40.2832	-40.0696	-51.2695	-40.0696
0.109	-35.4004	-40.1306	-23.1934	-40.1001	-20.752	-40.1001	-12.207	-40.1001	-25.6348	-40.1001	-32.3486	-40.1001	-32.959	-40.1001	-93.9941	-40.1001	-43.335	-40.1001	-85.4492	-40.1001	-42.7246	-40.1001	-46.9971	-40.0696	-31.7383	-40.1306	-32.3486	-40.1001	-43.9453	-40.1001	-43.335	-40.1001	-42.1143	-40.1001	-36.0107	-40.1306	-61.0352	-40.1001
0.1095	-32.959	-40.0696	-15.8691	-40.1001	-21.9727	-40.1306	-6.10352	-40.1001	-31.7383	-40.1001	-23.1934	-40.1306	-41.5039	-40.1001	-105.591	-40.1306	-48.2178	-40.1001	-86.0596	-40.1306	-28.0762	-40.1001	-46.9971	-40.0696	-48.8281	-40.0696	-33.5693	-40.1306	-43.335	-40.1306	-41.5039	-40.0696	-40.8936	-40.1001	-45.166	-40.1001	-59.2041	-40.0696
0.11	-7.93457	-40.1001	-14.0381	-40.1001	-20.752	-40.0696	-20.1416	-40.0696	-20.752	-40.1001	-28.0762	-40.1306	-42.7246	-40.0696	-104.37	-40.1001	-34.1797	-40.1001	-78.7354	-40.0696	-12.8174	-40.1001	-48.2178	-40.0696	-51.2695	-40.1001	-40.8936	-40.1306	-33.5693	-40.1001	-45.166	-40.0696	-35.4004	-40.1001	-36.0107	-40.0696	-48.8281	-40.1001
0.1105	-15.8691	-40.1001	-21.9727	-40.1001	-33.5693	-40.1001	-12.207	-40.1001	-26.8555	-40.0696	-36.0107	-40.1001	-42.1143	-40.1001	-90.332	-40.1306	-39.6729	-40.0696	-67.749	-40.0696	-43.335	-40.1306	-47.6074	-40.0696	-38.4521	-40.1001	-23.1934	-40.1001	-45.7764	-40.0696	-50.6592	-40.0696	-33.5693	-40.1001	-34.1797	-40.1306	-52.4902	-40.1306
0.111	-24.4141	-40.0696	-17.0898	-40.1001	-31.7383	-40.1001	-25.6348	-40.1306	-15.2588	-40.0696	-34.79	-40.0696	-32.959	-40.1001	-88.501	-40.1306	-46.9971	-40.1001	-57.9834	-40.1306	-39.0625	-40.1306	-37.8418	-40.1001	-36.6211	-40.1001	-39.6729	-40.1001	-39.6729	-40.0696	-41.5039	-40.1001	-38.4521	-40.1001	-36.0107	-40.1306	-32.959	-40.0696
0.1115	-21.9727	-40.1001	-7.93457	-40.1001	-17.0898	-40.0696	-18.9209	-40.1001	-25.6348	-40.0696	-34.1797	-40.1306	-46.9971	-40.1001	-100.708	-40.0696	-23.8037	-40.1001	-50.0488	-40.1001	-40.2832	-40.1001	-50.6592	-40.1001	-46.9971	-40.1001	-31.1279	-40.0696	-39.0625	-40.1001	-43.335	-40.1001	-18.3105	-40.1001	-35.4004	-40.1001	-42.1143	-40.0696
0.112	-20.1416	-40.1306	-17.0898	-40.1001	-24.4141	-40.0696	-8.54492	-40.1001	-20.752	-40.0696	-31.1279	-40.1001	-52.4902	-40.1001	-94.6045	-40.0696	-28.6865	-40.0696	-62.2559	-40.1001	-39.0625	-40.1306	-37.8418	-40.1001	-34.79	-40.1001	-29.2969	-40.1001	-38.4521	-40.1001	-64.0869	-40.0696	-34.1797	-40.1001	-31.7383	-40.1001	-59.8145	-40.1001
0.1125	-23.1934	-40.1001	-21.3623	-40.1001	-15.2588	-40.1001	-21.9727	-40.1001	-23.8037	-40.1306	-30.5176	-40.1001	-42.7246	-40.0391	-95.2148	-40.1001	-29.9072	-40.1001	-66.5283	-40.0696	-35.4004	-40.1001	-53.1006	-40.1001	-27.4658	-40.1306	-29.9072	-40.1001	-26.8555	-40.1001	-39.6729	-40.0696	-50.0488	-40.0696	-43.9453	-40.1001	-44.5557	-40.1001
0.113	-22.583	-40.1001	-4.27246	-40.1001	-25.6348	-40.0696	-32.959	-40.1001	-12.8174	-40.0696	-31.1279	-40.1001	-41.5039	-40.1001	-92.7734	-40.0696	-28.0762	-40.1306	-81.1768	-40.1001	-29.9072	-40.1001	-46.3867	-40.1001	-30.5176	-40.1001	-38.4521	-40.1001	-29.2969	-40.1001	-31.1279	-40.1306	-36.0107	-40.1001	-41.5039	-40.1001	-46.3867	-40.0696
0.1135	-24.4141	-40.1306	-30.5176	-40.1001	-15.2588	-40.1001	-20.752	-40.1001	-20.752	-40.0696	-17.7002	-40.1001	-40.8936	-40.0696	-87.2803	-40.1001	-42.7246	-40.0696	-61.6455	-40.1001	-31.7383	-40.1001	-45.7764	-40.1001	-33.5693	-40.1001	-29.9072	-40.1001	-17.7002	-40.1001	-46.9971	-40.1001	-38.4521	-40.0696	-54.3213	-40.1001	-38.4521	-40.1001
0.114	-20.752	-40.1001	-8.54492	-40.1001	-18.9209	-40.1001	-23.8037	-40.1001	-21.3623	-40.1001	-34.79	-40.0696	-46.3867	-40.0696	-93.9941	-40.1306	-32.3486	-40.1001	-54.9316	-40.1001	-28.0762	-40.1306	-40.2832	-40.0696	-50.0488	-40.1001	-36.6211	-40.1306	-37.8418	-40.1001	-46.3867	-40.1001	-42.1143	-40.0696	-46.3867	-40.1306	-46.9971	-40.1306
0.1145	-23.8037	-40.1001	-3.05176	-40.1001	-29.2969	-40.1001	-26.8555	-40.0696	-29.2969	-40.1001	-36.0107	-40.1001	-45.166	-40.1306	-91.5527	-40.1001	-36.0107	-40.1001	-68.9697	-40.1001	-34.1797	-40.1306	-30.5176	-40.1001	-40.2832	-40.1306	-24.4141	-40.1001	-36.0107	-40.1001	-53.7109	-40.1001	-40.8936	-40.1306	-43.335	-40.1001	-56.1523	-40.0696
0.115	-17.7002	-40.1306	-8.54492	-40.1001	-16.4795	-40.1001	-14.0381	-40.1001	-26.8555	-40.0696	-23.1934	-40.0696	-40.8936	-40.1001	-89.1113	-40.1306	-34.79	-40.1306	-70.1904	-40.1001	-29.2969	-40.1001	-50.0488	-40.1001	-42.1143	-40.1001	-30.5176	-40.0696	-34.1797	-40.0696	-37.8418	-40.0696	-32.3486	-40.1001	-45.7764	-40.1001	-68.3594	-40.1306
0.1155	-7.93457	-40.1001	-23.1934	-40.1001	-21.9727	-40.1001	-18.3105	-40.1306	-30.5176	-40.1001	-28.6865	-40.1001	-45.7764	-40.1001	-97.6563	-40.1001	-56.7627	-40.0696	-71.4111	-40.1001	-21.3623	-40.1001	-43.9453	-40.1001	-39.0625	-40.1001	-41.5039	-40.1306	-51.8799	-40.1306	-45.166	-40.1306	-36.6211	-40.0696	-34.79	-40.1001	-52.4902	-40.1306
0.116	-15.2588	-40.1001	-15.8691	-40.1001	-20.1416	-40.0696	-9.76563	-40.1001	-23.8037	-40.1001	-26.2451	-40.1001	-45.7764	-40.1001	-97.6563	-40.1001	-54.9316	-40.1306	-75.6836	-40.1001	-29.9072	-40.1306	-36.6211	-40.0696	-40.8936	-40.1001	-24.4141	-40.1001	-40.2832	-40.1001	-53.1006	-40.1001	-40.2832	-40.0391	-37.8418	-40.0696	-47.6074	-40.1001
0.1165	-19.5313	-40.1306	-24.4141	-40.1001	-25.0244	-40.0696	-14.6484	-40.1001	-10.376	-40.0696	-26.2451	-40.1001	-41.5039	-40.1001	-91.5527	-40.0696	-60.4248	-40.1001	-67.1387	-40.1001	-23.1934	-40.1001	-40.2832	-40.0696	-32.3486	-40.0696	-32.3486	-40.1001	-40.2832	-40.1306	-44.5557	-40.1001	-33.5693	-40.0696	-39.0625	-40.0696	-46.3867	-40.1001
0.117	-16.4795	-40.1001	-22.583	-40.1001	-23.1934	-40.1306	-20.752	-40.1001	-30.5176	-40.0696	-34.1797	-40.1001	-40.8936	-40.1001	-90.332	-40.1001	-62.8662	-40.1001	-69.5801	-40.1001	-36.6211	-40.1001	-40.2832	-40.1001	-30.5176	-40.1306	-43.9453	-40.1001	-31.1279	-40.1001	-50.6592	-40.1001	-36.6211	-40.1001	-33.5693	-40.0696	-65.3076	-40.1001
0.1175	-18.3105	-40.1001	-29.2969	-40.1001	-20.752	-40.1001	-16.4795	-40.1001	-25.0244	-40.1001	-20.752	-40.1001	-37.2314	-40.1001	-93.3838	-40.1001	-54.3213	-40.1001	-79.3457	-40.1001	-39.6729	-40.1001	-32.959	-40.1001	-28.6865	-40.1001	-50.0488	-40.1001	-40.2832	-40.1001	-54.9316	-40.1306	-59.2041	-40.0696	-33.5693	-40.0696	-59.8145	-40.1001
0.118	-7.93457	-40.1306	-29.2969	-40.0696	-33.5693	-40.1001	-22.583	-40.0696	-34.1797	-40.1001	-33.5693	-40.1001	-50.6592	-40.0696	-112.915	-40.0696	-47.6074	-40.1001	-90.9424	-40.1001	-31.7383	-40.1001	-35.4004	-40.1001	-40.2832	-40.1001	-27.4658	-40.1001	-33.5693	-40.1001	-29.9072	-40.1001	-43.335	-40.0696	-42.1143	-40.1001	-65.3076	-40.1001
0.1185	-21.3623	-40.1001	-15.2588	-40.0391	-20.1416	-40.1001	-11.5967	-40.1001	-28.6865	-40.1001	-20.752	-40.1001	-51.2695	-40.1001	-98.2666	-40.1001	-45.7764	-40.0696	-91.5527	-40.1001	-28.6865	-40.1001	-42.1143	-40.1001	-33.5693	-40.1001	-39.6729	-40.1001	-28.0762	-40.1001	-38.4521	-40.1001	-43.335	-40.1306	-40.2832	-40.1001	-67.1387	-40.1001
0.119	-29.9072	-40.1001	-20.1416	-40.1001	-22.583	-40.1001	-26.2451	-40.1001	-28.6865	-40.1001	-22.583	-40.1001	-57.9834	-40.1306	-101.929	-40.1001	-59.8145	-40.1001	-82.3975	-40.1306	-42.1143	-40.1001	-50.6592	-40.1001	-28.0762	-40.1001	-39.6729	-40.1306	-42.1143	-40.0696	-35.4004	-40.1306	-46.9971	-40.1306	-43.335	-40.1001	-61.0352	-40.1001
0.1195	-12.8174	-40.1001	-25.6348	-40.1001	-28.0762	-40.0696	-16.4795	-40.0696	-21.3623	-40.1001	-34.1797	-40.1001	-42.7246	-40.1001	-98.2666	-40.1001	-66.5283	-40.1306	-84.2285	-40.1001	-26.8555	-40.1001	-41.5039	-40.1001	-21.3623	-40.1306	-28.6865	-40.1306	-28.6865	-40.1306	-45.166	-40.1001	-45.7764	-40.1001	-38.4521	-40.1001	-62.8662	-40.0696
0.12	-23.1934	-40.1001	-23.8037	-40.1001	-15.2588	-40.1306	-18.3105	-40.1001	-32.959	-40.0391	-21.3623	-40.0696	-61.0352	-40.0696	-119.629	-40.1001	-81.7871	-40.1001	-70.8008	-40.0696	-23.8037	-40.1001	-59.2041	-40.1001	-33.5693	-40.1001	-40.8936	-40.1001	-32.959	-40.1306	-37.8418	-40.1001	-37.8418	-40.1001	-31.1279	-40.1306	-70.8008	-40.1001
0.1205	-18.9209	-40.1001	-12.207	-40.1001	-9.76563	-40.1001	-31.7383	-40.1001	-28.6865	-40.1001	-30.5176	-40.1001	-45.166	-40.1001	-65.918	-40.1001	-62.8662	-40.1001	-83.6182	-40.1001	-29.9072	-40.1306	-39.6729	-40.1001	-32.959	-40.1001	-44.5557	-40.1001	-34.79	-40.1001	-39.0625	-40.1001	-48.2178	-40.0696	-42.1143	-40.0696	-68.9697	-40.1001
0.121	-20.1416	-40.1306	-15.2588	-40.1306	-11.5967	-40.1001	-15.2588	-40.1001	-29.2969	-40.1306	-22.583	-40.1001	-51.8799	-40.1001	-62.2559	-40.1001	-32.959	-40.1001	-56.7627	-40.1306	-37.8418	-40.1001	-43.335	-40.1001	-49.4385	-40.1001	-34.79	-40.1001	-39.0625	-40.1001	-42.7246	-40.1001	-38.4521	-40.1001	-33.5693	-40.1001	-59.2041	-40.1001
0.1215	-24.4141	-40.0696	-17.0898	-40.0696	-29.2969	-40.1001	-21.9727	-40.1001	-30.5176	-40.1001	-15.2588	-40.0696	-47.6074	-40.0696	-73.2422	-40.1001	-58.5938	-40.1001	-69.5801	-40.0696	-31.7383	-40.1306	-38.4521	-40.0696	-28.6865	-40.0696	-37.2314	-40.1001	-36.0107	-40.1001	-31.7383	-40.1001	-42.7246	-40.1001	-45.166	-40.1001	-59.2041	-40.0696
0.122	-23.1934	-40.0696	-25.6348	-40.0696	-18.3105	-40.0696	-14.6484	-40.1001	-34.1797	-40.1001	-28.0762	-40.1001	-51.2695	-40.1001	-75.0732	-40.1306	-50.0488	-40.1001	-72.6318	-40.1001	-47.6074	-40.1306	-48.8281	-40.1001	-21.3623	-40.0696	-36.6211	-40.1001	-48.8281	-40.1001	-26.2451	-40.1001	-50.6592	-40.1001	-43.335	-40.1001	-48.2178	-40.1001
0.1225	-17.0898	-40.1001	-19.5313	-40.1306	-42.7246	-40.1306	-9.76563	-40.1001	-29.2969	-40.1001	-13.4277	-40.0696	-48.2178	-40.1611	-42.1143	-40.1306	-40.8936	-40.1001	-69.5801	-40.1001	-27.4658	-40.1001	-28.6865	-40.1306	-43.9453	-40.1001	-46.3867	-40.1306	-30.5176	-40.1001	-41.5039	-40.1001	-45.7764	-40.0696	-38.4521	-40.1001	-42.1143	-40.1001
0.123	-26.2451	-40.1001	-21.9727	-40.1306	-37.2314	-40.1001	-26.8555	-40.1001	-14.0381	-40.1001	-25.6348	-40.0696	-67.749	-40.1306	-55.542	-40.1001	-45.166	-40.1001	-56.1523	-40.1001	-28.0762	-40.1001	-51.2695	-40.1001	-28.6865	-40.1306	-36.6211	-40.1001	-34.1797	-40.1001	-43.335	-40.1001	-46.9971	-40.1001	-50.0488	-40.1001	-55.542	-40.1001
0.1235	-18.3105	-40.1001	-16.4795	-40.1001	-15.2588	-40.1001	-30.5176	-40.0696	-31.7383	-40.1001	-26.8555	-40.1001	-61.6455	-40.0696	-65.3076	-40.0696	-44.5557	-40.1001	-63.4766	-40.1001	-25.6348	-40.1001	-56.1523	-40.1001	-34.1797	-40.1001	-36.0107	-40.1001	-32.959	-40.1611	-42.1143	-40.1001	-52.4902	-40.1306	-48.8281	-40.1306	-51.8799	-40.0696
0.124	-19.5313	-40.1306	-10.9863	-40.1001	-23.1934	-40.1001	-19.5313	-40.1001	-20.752	-40.0696	-25.6348	-40.0696	-32.3486	-40.1001	-45.166	-40.1001	-56.7627	-40.1001	-56.1523	-40.1001	-33.5693	-40.1001	-50.6592	-40.1001	-31.7383	-40.1001	-34.79	-40.1001	-32.3486	-40.1001	-42.7246	-40.1001	-46.3867	-40.1001	-39.6729	-40.1001	-73.8525	-40.1001
0.1245	-10.9863	-40.1001	-3.66211	-40.1001	-28.0762	-40.1001	-32.3486	-40.1306	-34.79	-40.0696	-25.0244	-40.1001	-51.8799	-40.0696	-57.9834	-40.1001	-49.4385	-40.1001	-59.8145	-40.1001	-47.6074	-40.1001	-45.7764	-40.1306	-50.0488	-40.1001	-39.0625	-40.1001	-44.5557	-40.1001	-39.6729	-40.1001	-46.3867	-40.0696	-42.1143	-40.0696	-67.1387	-40.1306
0.125	-26.2451	-40.1001	-12.207	-40.1001	-18.9209	-40.1001	-21.9727	-40.1306	-29.2969	-40.1306	-28.0762	-40.1001	-47.6074	-40.1001	-76.2939	-40.1306	-40.2832	-40.1001	-72.0215	-40.1001	-34.1797	-40.1001	-47.6074	-40.1001	-45.166	-40.0696	-28.0762	-40.1306	-45.7764	-40.1001	-42.1143	-40.1001	-51.8799	-40.1306	-42.7246	-40.1001	-57.9834	-40.1001
0.1255	-21.3623	-40.1001	-15.2588	-40.1306	-28.0762	-40.1001	-16.4795	-40.1306	-20.752	-40.0696	-25.0244	-40.1001	-53.7109	-40.1001	-79.3457	-40.1306	-54.9316	-40.0696	-65.918	-40.1001	-37.2314	-40.1001	-46.9971	-40.1001	-39.0625	-40.1001	-36.0107	-40.1001	-42.7246	-40.1001	-48.8281	-40.1001	-45.166	-40.0696	-50.6592	-40.1306	-50.6592	-40.0696
0.126	-15.8691	-40.1001	-3.05176	-40.1001	-14.0381	-40.1001	-17.7002	-40.0391	-32.3486	-40.1001	-29.9072	-40.1001	-51.8799	-40.1001	-60.4248	-40.1306	-54.3213	-40.1001	-76.2939	-40.1001	-35.4004	-40.1001	-45.7764	-40.0696	-29.9072	-40.1001	-36.0107	-40.1001	-33.5693	-40.1001	-38.4521	-40.0696	-46.9971	-40.1306	-48.8281	-40.1001	-51.8799	-40.1001
0.1265	-22.583	-40.0696	-20.752	-40.0696	-31.1279	-40.0696	-10.9863	-40.1306	-29.9072	-40.0696	-22.583	-40.1001	-46.3867	-40.1001	-49.4385	-40.1306	-54.9316	-40.1001	-73.8525	-40.0696	-48.8281	-40.0696	-40.8936	-40.1001	-40.2832	-40.0696	-37.8418	-40.1001	-46.3867	-40.0696	-34.79	-40.1001	-52.4902	-40.1306	-37.2314	-40.1001	-72.0215	-40.0696
0.127	-17.7002	-40.1001	-3.66211	-40.1001	-18.9209	-40.1306	-26.2451	-40.1306	-35.4004	-40.0696	-37.8418	-40.1001	-48.8281	-40.1001	-65.3076	-40.0696	-72.6318	-40.0696	-68.9697	-40.1001	-29.9072	-40.1001	-34.79	-40.0696	-37.8418	-40.1001	-46.3867	-40.1001	-41.5039	-40.0696	-32.3486	-40.1001	-37.2314	-40.1001	-55.542	-40.1001	-56.1523	-40.1001
0.1275	-26.2451	-40.0696	-18.3105	-40.1306	-23.1934	-40.1001	-23.1934	-40.1001	-23.1934	-40.1001	-20.1416	-40.1001	-34.1797	-40.1001	-77.5146	-40.1306	-51.2695	-40.0696	-73.8525	-40.1001	-33.5693	-40.0696	-52.4902	-40.0696	-39.6729	-40.1001	-35.4004	-40.1306	-50.0488	-40.1001	-37.2314	-40.0696	-43.9453	-40.1001	-51.8799	-40.1001	-58.5938	-40.1001
0.128	-25.0244	-40.1001	-8.54492	-40.1001	-12.207	-40.1001	-12.8174	-40.1306	-14.6484	-40.1001	-23.1934	-40.0696	-43.9453	-40.1001	-52.4902	-40.1001	-64.0869	-40.1001	-69.5801	-40.1001	-44.5557	-40.1306	-39.6729	-40.1001	-47.6074	-40.1001	-28.0762	-40.1001	-43.9453	-40.1001	-50.0488	-40.1001	-38.4521	-40.1001	-49.4385	-40.1001	-56.7627	-40.1001
0.1285	-14.0381	-40.1001	-11.5967	-40.1306	-14.6484	-40.1001	-17.7002	-40.1306	-25.6348	-40.0696	-32.959	-40.1001	-45.7764	-40.1001	-81.7871	-40.0696	-68.3594	-40.0696	-61.0352	-40.0696	-42.1143	-40.1001	-39.0625	-40.1001	-41.5039	-40.1001	-26.8555	-40.0696	-45.166	-40.1001	-48.8281	-40.1001	-37.2314	-40.1001	-48.8281	-40.0696	-51.2695	-40.1001
0.129	-28.0762	-40.1306	-11.5967	-40.0696	-40.2832	-40.1001	-25.6348	-40.0696	-31.1279	-40.1001	-36.6211	-40.1001	-47.6074	-40.1001	-81.1768	-40.1306	-45.166	-40.1001	-54.3213	-40.1001	-43.9453	-40.1001	-39.6729	-40.1001	-48.2178	-40.1001	-29.2969	-40.1001	-32.959	-40.1001	-35.4004	-40.1001	-40.8936	-40.0696	-42.1143	-40.0696	-42.7246	-40.1001
0.1295	-15.2588	-40.1306	-12.207	-40.1001	-20.752	-40.1001	-13.4277	-40.1001	-12.207	-40.1306	-36.0107	-40.1001	-42.7246	-40.0696	-104.98	-40.1001	-54.3213	-40.1306	-70.8008	-40.0696	-42.1143	-40.1001	-45.166	-40.1001	-42.7246	-40.1001	-34.1797	-40.1306	-43.335	-40.1306	-59.2041	-40.1001	-36.0107	-40.1001	-46.9971	-40.0696	-46.3867	-40.1001
0.13	-24.4141	-40.1001	-11.5967	-40.0696	-26.8555	-40.1001	-21.3623	-40.1001	-20.1416	-40.0696	-31.7383	-40.1001	-60.4248	-40.1001	-89.1113	-40.1001	-57.373	-40.1001	-42.1143	-40.0696	-39.0625	-40.1001	-38.4521	-40.1001	-46.9971	-40.0696	-22.583	-40.1001	-36.0107	-40.1001	-45.166	-40.1001	-30.5176	-40.1001	-51.8799	-40.1306	-39.0625	-40.0696
0.1305	-32.959	-40.1001	-26.8555	-40.1306	-24.4141	-40.1001	-27.4658	-40.1001	-24.4141	-40.1001	-34.79	-40.1306	-72.0215	-40.1001	-88.501	-40.1001	-76.9043	-40.1001	-71.4111	-40.1001	-39.6729	-40.1001	-35.4004	-40.1001	-32.959	-40.1001	-40.8936	-40.1001	-32.3486	-40.0696	-39.6729	-40.0696	-38.4521	-40.1306	-56.7627	-40.1001	-57.9834	-40.0696
0.131	-20.1416	-40.1001	-11.5967	-40.1001	-29.9072	-40.1306	-28.6865	-40.1001	-25.0244	-40.1306	-30.5176	-40.1001	-37.8418	-40.1001	-97.6563	-40.1001	-56.1523	-40.1001	-63.4766	-40.1001	-33.5693	-40.1001	-35.4004	-40.1001	-36.0107	-40.1001	-26.2451	-40.1001	-32.3486	-40.1001	-40.2832	-40.1001	-45.7764	-40.0696	-47.6074	-40.1306	-42.1143	-40.1001
0.1315	-28.0762	-40.1001	-7.93457	-40.0696	-23.1934	-40.1306	-13.4277	-40.1306	-31.7383	-40.1001	-39.6729	-40.1001	-45.166	-40.1001	-65.918	-40.1001	-47.6074	-40.0696	-34.1797	-40.1306	-39.6729	-40.1001	-50.0488	-40.1306	-46.9971	-40.0696	-29.9072	-40.1001	-39.0625	-40.1001	-50.6592	-40.1001	-40.2832	-40.1306	-53.1006	-40.1001	-47.6074	-40.1001
0.132	-15.2588	-40.1001	-10.376	-40.1306	-31.1279	-40.1001	-9.76563	-40.0696	-26.8555	-40.1001	-36.0107	-40.1001	-34.79	-40.0696	-81.7871	-40.1001	-50.0488	-40.1001	-42.1143	-40.1001	-35.4004	-40.1001	-42.7246	-40.1001	-33.5693	-40.1001	-20.752	-40.0696	-56.7627	-40.1001	-29.2969	-40.1001	-26.2451	-40.1306	-39.6729	-40.0696	-44.5557	-40.0696
0.1325	-31.1279	-40.1306	-16.4795	-40.1306	-12.207	-40.1001	-14.6484	-40.1001	-25.6348	-40.0696	-27.4658	-40.0696	-44.5557	-40.1001	-80.5664	-40.1001	-48.8281	-40.0696	-48.2178	-40.0696	-43.9453	-40.1001	-50.0488	-40.1306	-45.166	-40.1001	-26.2451	-40.1001	-30.5176	-40.1001	-33.5693	-40.1001	-33.5693	-40.1001	-56.1523	-40.1001	-34.1797	-40.1306
0.133	-10.376	-40.1001	-7.32422	-40.1001	-17.7002	-40.1306	-28.6865	-40.1306	-15.8691	-40.0696	-46.3867	-40.1001	-46.9971	-40.1001	-79.9561	-40.1001	-53.1006	-40.0696	-46.9971	-40.1001	-44.5557	-40.1001	-58.5938	-40.1306	-36.6211	-40.1306	-39.0625	-40.1001	-43.335	-40.1306	-51.2695	-40.1001	-37.2314	-40.1001	-45.7764	-40.0696	-46.9971	-40.0696
0.1335	-21.3623	-40.1001	-31.1279	-40.0696	-35.4004	-40.0696	-22.583	-40.1001	-10.9863	-40.1001	-34.79	-40.0696	-59.2041	-40.0696	-77.5146	-40.1306	-43.9453	-40.1001	-53.1006	-40.0696	-49.4385	-40.0696	-47.6074	-40.1001	-39.0625	-40.1001	-32.3486	-40.1001	-29.2969	-40.0696	-52.4902	-40.1001	-36.0107	-40.0696	-40.8936	-40.0696	-38.4521	-40.1001
0.134	-21.3623	-40.1306	-19.5313	-40.1001	-15.2588	-40.1001	-29.9072	-40.1001	-25.6348	-40.1001	-31.1279	-40.1001	-63.4766	-40.1306	-90.9424	-40.1306	-50.6592	-40.0696	-67.1387	-40.0696	-46.3867	-40.1001	-39.6729	-40.1001	-51.8799	-40.1001	-37.8418	-40.1001	-28.6865	-40.0696	-53.7109	-40.1001	-37.8418	-40.1001	-46.9971	-40.0696	-41.5039	-40.1001
0.1345	-23.8037	-40.0696	-7.32422	-40.0696	-21.9727	-40.1001	-12.8174	-40.1001	-18.3105	-40.1001	-39.6729	-40.1001	-37.2314	-40.1306	-76.2939	-40.1001	-51.2695	-40.1001	-68.3594	-40.1306	-42.1143	-40.1001	-45.166	-40.1001	-45.166	-40.1001	-42.1143	-40.1306	-34.79	-40.1001	-64.0869	-40.1001	-48.2178	-40.1001	-62.8662	-40.0696	-56.7627	-40.1001
0.135	-23.8037	-40.1306	-24.4141	-40.1001	-16.4795	-40.1001	-25.6348	-40.1001	-20.1416	-40.1001	-37.2314	-40.1001	-32.959	-40.1001	-69.5801	-40.1001	-45.7764	-40.0696	-61.6455	-40.0696	-55.542	-40.1001	-44.5557	-40.0696	-35.4004	-40.0696	-44.5557	-40.1001	-26.8555	-40.1001	-53.7109	-40.1001	-43.335	-40.1001	-45.166	-40.0696	-45.7764	-40.1001
0.1355	-20.752	-40.1001	-17.7002	-40.1001	-17.7002	-40.1001	-34.79	-40.1001	-6.71387	-40.0696	-30.5176	-40.1001	-39.0625	-40.1306	-109.253	-40.1001	-39.0625	-40.1306	-70.1904	-40.0696	-32.959	-40.1306	-32.959	-40.1001	-55.542	-40.1306	-34.1797	-40.1001	-37.2314	-40.0696	-54.3213	-40.1001	-35.4004	-40.1001	-50.6592	-40.1001	-43.9453	-40.1001
0.136	-27.4658	-40.1001	-15.2588	-40.1001	-33.5693	-40.1001	-29.2969	-40.1001	-14.6484	-40.1001	-21.9727	-40.1001	-54.3213	-40.1001	-98.2666	-40.1001	-50.0488	-40.1001	-60.4248	-40.1001	-47.6074	-40.1001	-52.4902	-40.0696	-40.8936	-40.0696	-38.4521	-40.1001	-28.6865	-40.1001	-61.0352	-40.1306	-35.4004	-40.1001	-45.166	-40.1001	-55.542	-40.1001
0.1365	-17.7002	-40.1306	-13.4277	-40.1001	-37.8418	-40.0696	-26.8555	-40.1001	-29.2969	-40.1001	-40.2832	-40.1001	-36.6211	-40.1001	-103.76	-40.1001	-42.1143	-40.1001	-64.0869	-40.1001	-43.335	-40.1001	-57.373	-40.1001	-26.2451	-40.0696	-34.1797	-40.1001	-34.79	-40.1001	-54.3213	-40.1001	-27.4658	-40.1001	-50.6592	-40.1001	-46.9971	-40.0696
0.137	-31.1279	-40.1001	-36.6211	-40.1306	-35.4004	-40.1001	-27.4658	-40.0696	-21.9727	-40.1001	-36.0107	-40.1306	-36.0107	-40.1001	-72.6318	-40.1001	-31.1279	-40.1001	-65.918	-40.1001	-34.79	-40.0696	-46.9971	-40.0696	-36.6211	-40.1001	-22.583	-40.0696	-32.959	-40.1001	-42.7246	-40.1001	-28.0762	-40.0696	-42.7246	-40.1001	-46.3867	-40.1001
0.1375	-13.4277	-40.1001	-28.0762	-40.0696	-31.7383	-40.1001	-16.4795	-40.1001	-32.959	-40.1306	-31.1279	-40.1001	-59.2041	-40.0696	-84.8389	-40.1001	-45.166	-40.1001	-76.2939	-40.0696	-62.8662	-40.1001	-26.8555	-40.1001	-34.79	-40.1001	-46.9971	-40.1001	-39.6729	-40.1001	-45.166	-40.1001	-41.5039	-40.1001	-35.4004	-40.1001	-45.7764	-40.1001
0.138	-15.2588	-40.1001	-29.2969	-40.1001	-20.1416	-40.1001	-20.1416	-40.1001	-28.0762	-40.1001	-23.8037	-40.0696	-47.6074	-40.1001	-107.422	-40.1001	-49.4385	-40.1001	-54.9316	-40.1001	-48.2178	-40.1001	-53.1006	-40.1306	-30.5176	-40.0696	-41.5039	-40.1001	-34.79	-40.1001	-40.2832	-40.1001	-45.166	-40.1001	-45.166	-40.1001	-57.373	-40.0696
0.1385	-11.5967	-40.1306	-22.583	-40.1001	-25.6348	-40.0696	-21.3623	-40.1001	-21.9727	-40.0696	-31.7383	-40.1001	-55.542	-40.1001	-83.0078	-40.1001	-44.5557	-40.1001	-76.9043	-40.0696	-32.3486	-40.0696	-44.5557	-40.1001	-37.8418	-40.1306	-39.6729	-40.0696	-35.4004	-40.0696	-40.2832	-40.1001	-37.8418	-40.1306	-34.79	-40.1001	-43.335	-40.1001
0.139	-18.3105	-40.0696	-21.3623	-40.1306	-12.8174	-40.1001	-17.0898	-40.1001	-19.5313	-40.1001	-28.0762	-40.0696	-50.0488	-40.1001	-90.9424	-40.0696	-59.2041	-40.0696	-67.1387	-40.1001	-39.0625	-40.1001	-46.3867	-40.1001	-39.0625	-40.1001	-29.9072	-40.1001	-25.6348	-40.1001	-51.2695	-40.1001	-46.3867	-40.0696	-55.542	-40.0696	-46.3867	-40.1001
0.1395	-12.8174	-40.0696	-19.5313	-40.1306	-26.2451	-40.1306	-35.4004	-40.1306	-28.6865	-40.1306	-34.1797	-40.1001	-46.9971	-40.1306	-72.0215	-40.1001	-60.4248	-40.1001	-59.2041	-40.1001	-38.4521	-40.1001	-45.166	-40.1001	-51.2695	-40.1001	-40.2832	-40.1306	-37.2314	-40.0696	-50.6592	-40.1001	-42.1143	-40.0696	-40.8936	-40.1001	-56.1523	-40.1001
0.14	-12.207	-40.1306	-9.76563	-40.1001	-26.2451	-40.1001	-29.2969	-40.1001	-20.752	-40.1001	-24.4141	-40.1001	-50.0488	-40.1001	-72.6318	-40.1001	-67.749	-40.1001	-46.3867	-40.1001	-38.4521	-40.0696	-64.6973	-40.1001	-37.2314	-40.1001	-42.7246	-40.1306	-29.2969	-40.1001	-44.5557	-40.1001	-51.2695	-40.1001	-25.6348	-40.1001	-58.5938	-40.1001
0.1405	-18.9209	-40.1306	-18.3105	-40.1306	-18.3105	-40.1001	-31.1279	-40.0696	-21.3623	-40.1306	-29.2969	-40.1001	-50.0488	-40.1001	-87.2803	-40.1306	-64.0869	-40.1001	-61.0352	-40.1001	-48.8281	-40.1001	-48.8281	-40.1001	-29.2969	-40.1001	-32.959	-40.1001	-25.6348	-40.1001	-54.9316	-40.1306	-35.4004	-40.1001	-44.5557	-40.1001	-43.9453	-40.1306
0.141	-4.27246	-40.0696	-4.88281	-40.1001	-29.9072	-40.1306	-26.2451	-40.1001	-23.8037	-40.1001	-25.0244	-40.1306	-46.3867	-40.1001	-91.5527	-40.1001	-57.9834	-40.1001	-50.6592	-40.0696	-43.9453	-40.1001	-50.6592	-40.1001	-45.7764	-40.1001	-40.2832	-40.1001	-26.2451	-40.1001	-62.2559	-40.1306	-39.6729	-40.1306	-64.0869	-40.1306	-56.7627	-40.1306
0.1415	-15.2588	-40.1001	-26.8555	-40.1001	-22.583	-40.1001	-12.8174	-40.1001	-28.0762	-40.1001	-29.2969	-40.0696	-36.6211	-40.1001	-75.6836	-40.1001	-46.3867	-40.0696	-55.542	-40.1001	-32.959	-40.1001	-48.8281	-40.1001	-43.335	-40.1001	-42.7246	-40.1306	-39.6729	-40.0696	-46.9971	-40.1001	-39.6729	-40.0696	-46.3867	-40.1001	-62.2559	-40.1001
0.142	0	-40.1001	-21.9727	-40.0696	-28.0762	-40.0696	-33.5693	-40.1001	-20.1416	-40.0696	-38.4521	-40.0696	-43.335	-40.0696	-73.2422	-40.1001	-48.2178	-40.0696	-72.6318	-40.1001	-32.959	-40.1001	-53.1006	-40.1001	-20.1416	-40.1001	-46.3867	-40.1001	-39.6729	-40.1306	-43.335	-40.1001	-40.8936	-40.1001	-37.2314	-40.1001	-52.4902	-40.1306
0.1425	-10.9863	-40.1001	-23.8037	-40.1001	-25.6348	-40.1001	-28.6865	-40.1001	-9.15527	-40.1001	-26.8555	-40.1001	-44.5557	-40.1001	-106.812	-40.1001	-64.0869	-40.1001	-68.9697	-40.1001	-27.4658	-40.0696	-41.5039	-40.1001	-44.5557	-40.1001	-36.0107	-40.1001	-41.5039	-40.0696	-43.335	-40.1306	-51.8799	-40.1306	-36.6211	-40.1001	-59.2041	-40.1001
0.143	-11.5967	-40.1306	-22.583	-40.1001	-19.5313	-40.0696	-41.5039	-40.1001	-5.49316	-40.1001	-33.5693	-40.0696	-48.8281	-40.1001	-56.7627	-40.1001	-67.749	-40.1001	-70.1904	-40.1306	-40.8936	-40.1001	-52.4902	-40.1306	-33.5693	-40.1001	-35.4004	-40.1306	-41.5039	-40.0696	-48.2178	-40.1001	-42.7246	-40.1001	-31.7383	-40.1001	-52.4902	-40.1001
0.1435	-6.71387	-40.1001	-25.0244	-40.1001	-34.1797	-40.1001	-21.9727	-40.1001	-22.583	-40.0696	-36.6211	-40.1001	-52.4902	-40.0391	-118.408	-40.0696	-39.6729	-40.1001	-68.9697	-40.1001	-43.335	-40.1001	-37.8418	-40.1001	-40.8936	-40.1001	-29.2969	-40.0696	-45.7764	-40.1306	-50.0488	-40.1001	-42.1143	-40.1001	-31.7383	-40.1001	-51.8799	-40.1001
0.144	-14.0381	-40.1001	-4.27246	-40.0696	-37.8418	-40.1001	-26.8555	-40.1001	-43.335	-40.1001	-25.6348	-40.1001	-34.1797	-40.0696	-81.7871	-40.1001	-43.335	-40.1001	-79.3457	-40.1306	-42.1143	-40.1001	-42.1143	-40.1001	-40.8936	-40.1001	-46.3867	-40.0696	-44.5557	-40.1001	-51.2695	-40.0696	-46.3867	-40.1306	-40.2832	-40.1001	-58.5938	-40.0696
0.1445	-13.4277	-40.1001	-17.0898	-40.1001	-34.1797	-40.1001	-26.8555	-40.0696	-39.6729	-40.1001	-29.9072	-40.0696	-36.6211	-40.1306	-115.967	-40.1306	-49.4385	-40.0696	-74.4629	-40.1306	-28.0762	-40.0696	-41.5039	-40.1001	-44.5557	-40.1001	-39.6729	-40.1001	-43.335	-40.0696	-54.9316	-40.1306	-40.2832	-40.1306	-37.8418	-40.1001	-54.9316	-40.0696
0.145	-9.76563	-40.1001	-15.2588	-40.1001	-27.4658	-40.1001	-25.0244	-40.0696	-34.1797	-40.0696	-39.0625	-40.0696	-26.8555	-40.0696	-120.239	-40.1306	-54.3213	-40.1001	-58.5938	-40.1001	-36.6211	-40.0696	-34.79	-40.1001	-34.1797	-40.1001	-25.6348	-40.1001	-37.8418	-40.1306	-61.0352	-40.1001	-50.0488	-40.1001	-57.373	-40.1001	-48.2178	-40.0696
0.1455	-21.9727	-40.1001	-17.0898	-40.1001	-23.1934	-40.1001	-23.8037	-40.1001	-42.1143	-40.1306	-31.1279	-40.1001	-31.1279	-40.1306	-81.7871	-40.1306	-42.7246	-40.1001	-62.2559	-40.1001	-32.959	-40.1001	-39.0625	-40.1001	-48.8281	-40.1001	-38.4521	-40.1001	-39.6729	-40.1001	-56.7627	-40.1001	-41.5039	-40.1306	-46.9971	-40.1001	-48.8281	-40.0696
0.146	-3.05176	-40.1001	-12.8174	-40.1001	-26.8555	-40.1306	-21.9727	-40.0696	-34.1797	-40.1001	-33.5693	-40.1001	-35.4004	-40.1001	-122.07	-40.1001	-39.6729	-40.1306	-70.1904	-40.1306	-34.1797	-40.1306	-51.8799	-40.1001	-33.5693	-40.1306	-40.8936	-40.1001	-34.1797	-40.1001	-46.9971	-40.1001	-40.8936	-40.1001	-62.8662	-40.1001	-62.8662	-40.0696
0.1465	2.44141	-40.1001	-12.207	-40.1001	-26.8555	-40.1001	-34.79	-40.1306	-23.8037	-40.1001	-31.1279	-40.1001	-40.2832	-40.1001	-104.37	-40.0696	-32.3486	-40.1306	-57.373	-40.1001	-39.0625	-40.1001	-48.8281	-40.1001	-29.9072	-40.1306	-31.7383	-40.1306	-42.7246	-40.1001	-36.6211	-40.0696	-48.8281	-40.1001	-58.5938	-40.1001	-48.8281	-40.1001
0.147	-7.93457	-40.0696	-14.6484	-40.0696	-18.3105	-40.1001	-29.2969	-40.0696	-21.9727	-40.1001	-51.8799	-40.1001	-41.5039	-40.1001	-86.6699	-40.1306	-63.4766	-40.1001	-46.3867	-40.0696	-38.4521	-40.1306	-34.1797	-40.1306	-36.0107	-40.1001	-46.9971	-40.0696	-49.4385	-40.1306	-40.8936	-40.1001	-39.0625	-40.1001	-38.4521	-40.1001	-46.3867	-40.1001
0.1475	-16.4795	-40.1306	-6.71387	-40.1001	-13.4277	-40.1306	-23.1934	-40.1306	-26.2451	-40.1001	-40.2832	-40.1306	-52.4902	-40.1001	-86.0596	-40.1306	-48.2178	-40.0696	-64.6973	-40.1306	-31.1279	-40.1001	-42.1143	-40.1306	-44.5557	-40.1001	-32.959	-40.1001	-36.0107	-40.1001	-36.6211	-40.1306	-40.2832	-40.1001	-49.4385	-40.0696	-62.2559	-40.1001
0.148	-21.3623	-40.1001	-20.752	-40.1306	-28.0762	-40.1001	-24.4141	-40.0696	-17.7002	-40.1001	-36.0107	-40.1001	-32.3486	-40.1001	-73.2422	-40.1001	-55.542	-40.1001	-103.149	-40.1001	-51.8799	-40.0696	-54.9316	-40.1001	-50.6592	-40.1001	-22.583	-40.0696	-26.8555	-40.1001	-39.6729	-40.1001	-32.3486	-40.0696	-56.7627	-40.1001	-59.8145	-40.1001
0.1485	-17.0898	-40.1001	-14.6484	-40.1306	-27.4658	-40.1001	-12.207	-40.0696	-25.6348	-40.1001	-42.1143	-40.1001	-43.9453	-40.1001	-68.9697	-40.1306	-60.4248	-40.0696	-98.2666	-40.1001	-29.9072	-40.1001	-45.166	-40.1001	-45.166	-40.1306	-32.3486	-40.1001	-36.0107	-40.1306	-28.0762	-40.1001	-36.0107	-40.1001	-56.1523	-40.0696	-54.9316	-40.1001
0.149	-13.4277	-40.1001	-18.3105	-40.1001	-18.3105	-40.1001	-27.4658	-40.1306	-24.4141	-40.1001	-65.918	-40.0696	-39.0625	-40.1001	-50.0488	-40.1001	-56.1523	-40.1001	-87.8906	-40.1001	-37.2314	-40.0696	-53.7109	-40.1001	-45.166	-40.1306	-25.6348	-40.1001	-45.166	-40.1001	-40.8936	-40.1001	-40.8936	-40.0696	-45.166	-40.1306	-50.6592	-40.1001
0.1495	-15.8691	-40.1001	-25.6348	-40.1306	-25.0244	-40.0696	-17.7002	-40.0696	-46.9971	-40.1001	-30.5176	-40.1001	-42.7246	-40.0696	-79.3457	-40.1001	-53.7109	-40.1306	-86.0596	-40.0696	-31.7383	-40.1001	-38.4521	-40.1001	-54.9316	-40.1306	-34.1797	-40.1001	-41.5039	-40.1306	-51.2695	-40.1001	-24.4141	-40.1001	-57.373	-40.1001	-53.7109	-40.1001
0.15	-23.1934	-40.1001	-20.1416	-40.1001	-23.1934	-40.1001	-24.4141	-40.1001	-39.6729	-40.1001	-28.6865	-40.1001	-35.4004	-40.1001	-77.5146	-40.1001	-72.6318	-40.1001	-78.7354	-40.1001	-27.4658	-40.1001	-54.3213	-40.0696	-50.0488	-40.1001	-40.8936	-40.1001	-32.3486	-40.1001	-43.9453	-40.0696	-37.2314	-40.1001	-50.0488	-40.0696	-56.1523	-40.1001
0.1505	-12.207	-40.1001	-20.1416	-40.1001	-23.1934	-40.1001	-7.93457	-40.1001	-40.2832	-40.0696	-30.5176	-40.1001	-37.2314	-40.1306	-104.98	-40.1306	-56.7627	-40.1001	-77.5146	-40.1001	-49.4385	-40.1001	-34.79	-40.0696	-56.7627	-40.0696	-30.5176	-40.1001	-46.9971	-40.1306	-48.8281	-40.1001	-31.7383	-40.0696	-43.9453	-40.1001	-42.7246	-40.1001
0.151	-17.0898	-40.1001	-18.3105	-40.1001	-34.79	-40.0696	-12.207	-40.1001	-18.3105	-40.1306	-30.5176	-40.1001	-51.8799	-40.1001	-90.9424	-40.0696	-72.0215	-40.1001	-80.5664	-40.1001	-39.6729	-40.1001	-42.1143	-40.1001	-45.166	-40.1001	-37.2314	-40.1001	-43.335	-40.0696	-51.8799	-40.1001	-46.9971	-40.1306	-48.8281	-40.1306	-53.7109	-40.1001
0.1515	-11.5967	-40.1001	-13.4277	-40.1001	-21.3623	-40.1001	-11.5967	-40.1001	-15.8691	-40.1001	-30.5176	-40.1001	-48.8281	-40.0696	-74.4629	-40.1001	-48.8281	-40.1306	-77.5146	-40.1306	-31.1279	-40.1306	-40.2832	-40.1001	-53.1006	-40.1001	-29.2969	-40.1001	-33.5693	-40.0696	-46.9971	-40.0696	-39.6729	-40.0696	-51.2695	-40.1001	-51.2695	-40.1001
0.152	-12.207	-40.1001	-7.93457	-40.1306	-37.8418	-40.1001	-21.3623	-40.1001	-12.8174	-40.1001	-46.3867	-40.1001	-40.8936	-40.1001	-89.7217	-40.1001	-62.8662	-40.0696	-81.7871	-40.0696	-38.4521	-40.1001	-44.5557	-40.0696	-32.3486	-40.1001	-23.1934	-40.1001	-28.0762	-40.1001	-51.8799	-40.1001	-32.3486	-40.1001	-56.1523	-40.1306	-51.8799	-40.1306
0.1525	-18.3105	-40.1001	-12.8174	-40.1001	-19.5313	-40.1001	-23.8037	-40.1001	-19.5313	-40.0696	-39.6729	-40.1001	-46.3867	-40.1001	-73.8525	-40.0696	-59.8145	-40.1306	-89.7217	-40.1001	-36.0107	-40.1001	-39.0625	-40.0696	-46.9971	-40.1001	-35.4004	-40.0696	-39.0625	-40.1001	-50.6592	-40.0696	-42.1143	-40.1306	-59.8145	-40.0696	-53.7109	-40.0696
0.153	-8.54492	-40.1001	-22.583	-40.0696	-22.583	-40.1001	-17.7002	-40.1001	-16.4795	-40.1001	-31.1279	-40.1001	-48.2178	-40.1001	-92.7734	-40.0696	-59.8145	-40.1001	-80.5664	-40.0696	-37.2314	-40.0696	-42.7246	-40.0696	-46.9971	-40.1306	-35.4004	-40.1001	-46.3867	-40.1001	-37.2314	-40.1001	-39.0625	-40.1001	-62.8662	-40.1001	-47.6074	-40.1306
0.1535	-25.0244	-40.1001	-9.76563	-40.0696	-17.7002	-40.0696	-15.8691	-40.1306	-26.2451	-40.1001	-45.7764	-40.1001	-59.8145	-40.1001	-90.9424	-40.1001	-51.8799	-40.0696	-89.7217	-40.1306	-47.6074	-40.1306	-39.6729	-40.1001	-50.6592	-40.1306	-28.0762	-40.0696	-36.0107	-40.0696	-54.3213	-40.1001	-48.8281	-40.1001	-50.0488	-40.1001	-49.4385	-40.0391
0.154	-23.1934	-40.1001	-13.4277	-40.1001	-33.5693	-40.0696	-17.0898	-40.0696	-10.9863	-40.1001	-40.8936	-40.1306	-56.7627	-40.1001	-72.0215	-40.1306	-45.7764	-40.0696	-84.8389	-40.1001	-34.79	-40.1001	-38.4521	-40.0696	-50.0488	-40.1306	-40.8936	-40.1306	-35.4004	-40.1001	-53.7109	-40.1001	-52.4902	-40.1001	-57.9834	-40.1001	-65.3076	-40.0696
0.1545	-25.0244	-40.1001	-21.9727	-40.1001	-31.7383	-40.1001	-26.2451	-40.1001	-39.0625	-40.1306	-32.959	-40.1306	-35.4004	-40.1001	-78.125	-40.0696	-47.6074	-40.1001	-103.149	-40.0696	-35.4004	-40.1001	-43.335	-40.1001	-42.1143	-40.1001	-50.0488	-40.1001	-31.7383	-40.1001	-48.8281	-40.1001	-36.0107	-40.1001	-48.2178	-40.1001	-61.0352	-40.1001
0.155	-13.4277	-40.1001	-26.8555	-40.1001	-27.4658	-40.1001	-25.6348	-40.0696	-31.7383	-40.0696	-28.0762	-40.1001	-44.5557	-40.1001	-86.6699	-40.1306	-42.1143	-40.1001	-72.0215	-40.1001	-42.1143	-40.1001	-53.1006	-40.1001	-36.6211	-40.1001	-42.1143	-40.1306	-39.6729	-40.1001	-39.6729	-40.1001	-45.166	-40.1001	-40.8936	-40.1001	-40.2832	-40.1306
0.1555	-16.4795	-40.1001	-32.3486	-40.1001	-34.79	-40.1001	-27.4658	-40.1001	-22.583	-40.0696	-25.6348	-40.1001	-70.8008	-40.1001	-84.2285	-40.1001	-43.9453	-40.1306	-70.8008	-40.1001	-32.959	-40.1001	-45.166	-40.1001	-48.8281	-40.1001	-38.4521	-40.1306	-32.3486	-40.1001	-53.7109	-40.1306	-42.7246	-40.0696	-32.3486	-40.1001	-61.6455	-40.1306
0.156	-23.1934	-40.1306	-23.8037	-40.1306	-29.9072	-40.1001	-19.5313	-40.0696	-9.15527	-40.0696	-29.9072	-40.1001	-46.3867	-40.1001	-68.3594	-40.0696	-39.0625	-40.1001	-68.9697	-40.1001	-45.166	-40.1001	-48.8281	-40.1001	-42.1143	-40.1001	-42.1143	-40.0696	-22.583	-40.0696	-47.6074	-40.1001	-37.2314	-40.1001	-49.4385	-40.0696	-60.4248	-40.1001
0.1565	-14.6484	-40.1306	-18.9209	-40.1001	-14.6484	-40.1001	-15.8691	-40.1001	-13.4277	-40.1001	-40.8936	-40.1001	-43.335	-40.1001	-68.3594	-40.1611	-34.79	-40.1001	-65.918	-40.1001	-32.3486	-40.0696	-47.6074	-40.1306	-43.9453	-40.1001	-31.7383	-40.0696	-18.9209	-40.1001	-47.6074	-40.1001	-40.8936	-40.0696	-54.9316	-40.1001	-71.4111	-40.1001
0.157	-13.4277	-40.1306	-21.9727	-40.1306	-34.79	-40.0696	-31.1279	-40.1001	-28.6865	-40.1306	-39.6729	-40.0696	-50.0488	-40.1001	-87.8906	-40.1306	-45.166	-40.0696	-59.2041	-40.0696	-36.6211	-40.1001	-36.6211	-40.0696	-43.9453	-40.0696	-34.79	-40.1306	-26.2451	-40.1001	-41.5039	-40.1001	-51.8799	-40.1001	-40.8936	-40.1001	-56.1523	-40.1001
0.1575	-10.9863	-40.1306	-22.583	-40.1001	-21.3623	-40.1306	-12.207	-40.1001	-26.2451	-40.0696	-20.1416	-40.1001	-39.6729	-40.1306	-84.2285	-40.0696	-62.2559	-40.1001	-56.7627	-40.0696	-47.6074	-40.1306	-46.3867	-40.0696	-42.7246	-40.1611	-39.6729	-40.1001	-28.6865	-40.1001	-45.7764	-40.1001	-54.3213	-40.1001	-45.7764	-40.1001	-65.918	-40.1001
0.158	-4.27246	-40.1001	-25.0244	-40.1001	-31.7383	-40.1306	-16.4795	-40.0696	-26.2451	-40.1306	-20.752	-40.1001	-49.4385	-40.1001	-79.9561	-40.1001	-45.166	-40.1001	-70.8008	-40.0696	-43.9453	-40.1001	-42.1143	-40.1001	-43.335	-40.1001	-36.0107	-40.1001	-41.5039	-40.1001	-38.4521	-40.0696	-27.4658	-40.1001	-42.1143	-40.1001	-64.6973	-40.1306
0.1585	-26.2451	-40.1001	-27.4658	-40.0696	-15.2588	-40.0696	-16.4795	-40.1001	-22.583	-40.1306	-36.6211	-40.0696	-47.6074	-40.1001	-93.3838	-40.0696	-42.7246	-40.1001	-54.3213	-40.1001	-39.0625	-40.1001	-44.5557	-40.1001	-45.166	-40.1306	-43.335	-40.1001	-31.1279	-40.0696	-59.2041	-40.1001	-53.1006	-40.1001	-30.5176	-40.1001	-61.6455	-40.1001
0.159	-8.54492	-40.0696	-29.9072	-40.0696	-21.9727	-40.1306	-21.3623	-40.0696	-23.8037	-40.1001	-36.0107	-40.1001	-48.2178	-40.1306	-74.4629	-40.1001	-52.4902	-40.1001	-46.3867	-40.1001	-43.335	-40.0696	-45.166	-40.1001	-47.6074	-40.1001	-32.3486	-40.1001	-26.2451	-40.0696	-54.9316	-40.0696	-36.0107	-40.1001	-50.6592	-40.1001	-68.9697	-40.1001
0.1595	-12.8174	-40.1306	-26.8555	-40.1001	-19.5313	-40.1001	-32.959	-40.1001	-31.7383	-40.1001	-20.752	-40.0696	-50.6592	-40.1001	-71.4111	-40.0696	-56.7627	-40.1001	-54.9316	-40.1001	-48.2178	-40.1001	-50.6592	-40.0696	-40.8936	-40.1001	-42.7246	-40.1001	-42.1143	-40.0696	-49.4385	-40.1306	-37.8418	-40.1001	-44.5557	-40.1001	-58.5938	-40.1001
0.16	-18.9209	-40.1306	-17.0898	-40.1306	-18.9209	-40.1001	-7.93457	-40.1306	-31.1279	-40.1001	-32.959	-40.1306	-51.8799	-40.1001	-57.373	-40.1001	-54.3213	-40.1001	-50.6592	-40.1001	-34.1797	-40.1001	-60.4248	-40.1306	-31.7383	-40.1001	-36.6211	-40.1001	-28.0762	-40.1001	-53.1006	-40.1001	-46.3867	-40.0696	-57.9834	-40.1001	-56.1523	-40.1001
0.1605	-7.32422	-40.1001	-27.4658	-40.1306	-11.5967	-40.1001	-18.9209	-40.1001	-25.0244	-40.1306	-39.0625	-40.0696	-49.4385	-40.1001	-57.9834	-40.1306	-60.4248	-40.0696	-49.4385	-40.1001	-43.9453	-40.1001	-39.6729	-40.1306	-38.4521	-40.1306	-35.4004	-40.1001	-25.6348	-40.0696	-56.1523	-40.0696	-34.79	-40.1001	-45.7764	-40.0696	-67.749	-40.0696
0.161	-10.9863	-40.1001	-11.5967	-40.1001	-17.0898	-40.1001	-15.2588	-40.0696	-34.79	-40.1001	-28.0762	-40.1306	-36.6211	-40.1001	-71.4111	-40.1001	-62.2559	-40.1001	-57.9834	-40.0696	-37.8418	-40.1001	-51.8799	-40.0696	-43.335	-40.1306	-34.79	-40.1001	-26.2451	-40.1001	-55.542	-40.0696	-35.4004	-40.1001	-50.0488	-40.1001	-66.5283	-40.1001
0.1615	-6.10352	-40.1001	-32.3486	-40.1001	-22.583	-40.1306	-21.3623	-40.1001	-21.9727	-40.1001	-26.8555	-40.1001	-54.3213	-40.1001	-86.6699	-40.1306	-66.5283	-40.1001	-47.6074	-40.1001	-35.4004	-40.1001	-38.4521	-40.0696	-53.1006	-40.1001	-46.9971	-40.1001	-36.0107	-40.1001	-54.9316	-40.1306	-45.7764	-40.0696	-57.9834	-40.0696	-72.6318	-40.1001
0.162	-18.9209	-40.1306	-26.2451	-40.0696	-45.7764	-40.1001	-26.2451	-40.1306	-25.0244	-40.1001	-40.8936	-40.1306	-39.6729	-40.1001	-92.7734	-40.0696	-72.0215	-40.0696	-50.0488	-40.1001	-20.752	-40.1001	-61.0352	-40.0696	-31.1279	-40.0696	-43.9453	-40.1001	-43.335	-40.1001	-58.5938	-40.0696	-50.6592	-40.0696	-49.4385	-40.0696	-59.2041	-40.1001
0.1625	-9.15527	-40.1306	-29.2969	-40.1306	-18.3105	-40.0696	-21.3623	-40.0696	-26.2451	-40.1001	-30.5176	-40.1001	-44.5557	-40.1001	-101.318	-40.1001	-69.5801	-40.1001	-54.9316	-40.1306	-31.7383	-40.1001	-54.9316	-40.1001	-39.6729	-40.1001	-46.9971	-40.0696	-41.5039	-40.0696	-48.2178	-40.0696	-57.373	-40.0696	-57.9834	-40.1306	-81.7871	-40.1306
0.163	-3.05176	-40.1001	-20.1416	-40.1001	-32.3486	-40.0696	-23.1934	-40.1001	-38.4521	-40.1001	-34.1797	-40.1306	-28.6865	-40.1001	-105.591	-40.1001	-65.3076	-40.1001	-62.2559	-40.1306	-28.0762	-40.1306	-50.6592	-40.1001	-30.5176	-40.0696	-45.166	-40.1001	-41.5039	-40.1001	-43.9453	-40.1001	-38.4521	-40.0696	-43.9453	-40.1001	-80.5664	-40.1001
0.1635	-7.93457	-40.1001	-11.5967	-40.1001	-29.9072	-40.1306	-20.752	-40.1001	-34.1797	-40.1306	-25.6348	-40.1306	-37.8418	-40.0696	-95.2148	-40.0696	-75.6836	-40.1001	-39.6729	-40.1001	-41.5039	-40.1001	-64.0869	-40.1001	-34.1797	-40.1001	-40.2832	-40.1001	-34.1797	-40.1001	-43.9453	-40.1001	-42.7246	-40.1306	-33.5693	-40.1001	-54.9316	-40.1001
0.164	-7.93457	-40.1001	-16.4795	-40.1306	-33.5693	-40.1001	-3.05176	-40.1001	-25.0244	-40.1001	-37.8418	-40.0696	-34.79	-40.0696	-110.474	-40.1001	-87.2803	-40.0696	-47.6074	-40.1306	-25.6348	-40.1001	-46.3867	-40.1001	-28.0762	-40.1001	-42.7246	-40.1001	-36.0107	-40.1001	-51.2695	-40.1001	-42.7246	-40.1001	-56.1523	-40.1001	-62.8662	-40.1001
0.1645	-9.15527	-40.0696	-26.8555	-40.1001	-36.0107	-40.1306	-32.959	-40.1306	-21.9727	-40.1306	-42.7246	-40.1306	-50.6592	-40.1001	-110.474	-40.1306	-79.3457	-40.1001	-40.2832	-40.1306	-31.7383	-40.1306	-43.335	-40.1306	-36.6211	-40.1001	-47.6074	-40.1001	-40.8936	-40.1001	-48.8281	-40.1001	-39.0625	-40.1001	-54.3213	-40.1001	-65.918	-40.1001
0.165	-12.8174	-40.1306	-7.32422	-40.0696	-27.4658	-40.1001	-20.752	-40.1306	-33.5693	-40.0696	-48.8281	-40.1306	-37.2314	-40.1001	-100.708	-40.1001	-65.3076	-40.0391	-39.0625	-40.1306	-37.8418	-40.1001	-45.166	-40.1001	-20.1416	-40.1001	-31.1279	-40.1001	-48.8281	-40.1001	-51.8799	-40.1001	-46.9971	-40.1001	-49.4385	-40.0696	-57.9834	-40.1001
0.1655	-17.7002	-40.1001	-12.8174	-40.1001	-16.4795	-40.1306	-26.2451	-40.0696	-23.1934	-40.1001	-26.2451	-40.1001	-36.0107	-40.1306	-109.863	-40.1306	-39.0625	-40.1001	-51.8799	-40.1001	-38.4521	-40.1001	-45.166	-40.1001	-33.5693	-40.1001	-34.1797	-40.1306	-34.79	-40.1001	-49.4385	-40.1001	-36.6211	-40.1001	-36.6211	-40.0696	-50.6592	-40.0696
0.166	-6.71387	-40.0696	-16.4795	-40.1001	-20.1416	-40.1001	-11.5967	-40.0696	-22.583	-40.1306	-23.8037	-40.0696	-45.166	-40.1001	-95.8252	-40.1001	-54.9316	-40.1001	-53.7109	-40.1001	-31.7383	-40.1001	-51.2695	-40.1001	-39.6729	-40.1001	-44.5557	-40.1001	-31.1279	-40.1001	-56.7627	-40.1001	-42.7246	-40.1001	-62.8662	-40.1001	-52.4902	-40.1001
0.1665	-3.05176	-40.1001	-31.7383	-40.0696	-22.583	-40.1001	-23.1934	-40.1001	-19.5313	-40.0696	-26.8555	-40.1001	-45.7764	-40.1001	-101.318	-40.1001	-63.4766	-40.1001	-40.2832	-40.1001	-33.5693	-40.1001	-39.6729	-40.1001	-32.3486	-40.1001	-50.0488	-40.1001	-40.8936	-40.1001	-34.79	-40.1001	-57.373	-40.1306	-59.2041	-40.1306	-56.7627	-40.1001
0.167	-30.5176	-40.1001	-7.93457	-40.1306	-18.3105	-40.0696	-17.0898	-40.1001	-20.1416	-40.1001	-39.6729	-40.0696	-45.7764	-40.0696	-95.2148	-40.1001	-60.4248	-40.1001	-67.749	-40.1001	-34.79	-40.1001	-40.8936	-40.1001	-25.0244	-40.1001	-39.0625	-40.1001	-52.4902	-40.1001	-53.1006	-40.0696	-46.3867	-40.1001	-54.3213	-40.1001	-55.542	-40.1001
0.1675	-9.76563	-40.1001	-20.1416	-40.1306	-35.4004	-40.1001	-29.9072	-40.0696	-30.5176	-40.0696	-31.7383	-40.1306	-56.7627	-40.1001	-85.4492	-40.1306	-37.8418	-40.1001	-40.2832	-40.1001	-27.4658	-40.1306	-48.2178	-40.1001	-37.8418	-40.1001	-37.2314	-40.1001	-44.5557	-40.1001	-39.0625	-40.1001	-38.4521	-40.0696	-42.1143	-40.1001	-64.0869	-40.0696
0.168	-12.207	-40.0696	-17.7002	-40.0696	-15.8691	-40.1001	-18.9209	-40.1001	-21.9727	-40.1001	-23.8037	-40.1306	-53.7109	-40.1001	-104.37	-40.1306	-50.6592	-40.1001	-37.2314	-40.1001	-54.3213	-40.1001	-39.0625	-40.1001	-29.9072	-40.0696	-43.9453	-40.1001	-35.4004	-40.1001	-62.2559	-40.1001	-47.6074	-40.1001	-61.0352	-40.1001	-65.3076	-40.1001
0.1685	-34.1797	-40.1306	-9.76563	-40.1001	-31.1279	-40.1306	-9.15527	-40.0696	-33.5693	-40.1001	-27.4658	-40.1001	-62.2559	-40.1001	-94.6045	-40.1001	-28.6865	-40.1001	-53.1006	-40.1001	-40.8936	-40.1001	-54.3213	-40.0696	-31.7383	-40.1001	-43.335	-40.1001	-30.5176	-40.0696	-45.166	-40.1306	-45.7764	-40.0696	-36.6211	-40.0696	-64.6973	-40.1001
0.169	-22.583	-40.1001	-23.8037	-40.1001	-23.8037	-40.1306	-21.3623	-40.1001	-27.4658	-40.1001	-25.6348	-40.1001	-59.8145	-40.1001	-65.3076	-40.1001	-41.5039	-40.1001	-70.1904	-40.0696	-34.79	-40.1001	-39.6729	-40.1001	-40.2832	-40.1001	-42.1143	-40.1001	-42.7246	-40.1001	-67.749	-40.1001	-40.8936	-40.0696	-42.1143	-40.0696	-50.0488	-40.0696
0.1695	-14.6484	-40.1306	-20.1416	-40.1306	-28.6865	-40.1001	-23.1934	-40.1001	-23.1934	-40.1306	-23.8037	-40.1306	-47.6074	-40.1306	-62.8662	-40.1001	-25.0244	-40.0696	-50.0488	-40.1001	-30.5176	-40.1001	-43.335	-40.1306	-35.4004	-40.1306	-38.4521	-40.0696	-45.7764	-40.1001	-57.373	-40.1001	-45.7764	-40.1001	-67.1387	-40.1001	-57.9834	-40.1001
0.17	-19.5313	-40.1001	-14.0381	-40.1001	-23.1934	-40.1001	-23.1934	-40.1001	-15.8691	-40.0696	-37.8418	-40.1001	-40.8936	-40.1001	-79.9561	-40.1001	-54.3213	-40.1001	-31.1279	-40.1001	-39.6729	-40.1001	-39.0625	-40.1306	-37.2314	-40.1001	-48.8281	-40.1306	-40.8936	-40.1001	-43.9453	-40.1001	-40.8936	-40.0696	-53.7109	-40.0696	-51.8799	-40.0696
0.1705	-23.1934	-40.0696	-24.4141	-40.0391	-26.2451	-40.1306	-18.9209	-40.1306	-26.8555	-40.1306	-32.959	-40.1001	-43.335	-40.1306	-102.539	-40.1001	-50.0488	-40.1001	-39.6729	-40.1001	-40.8936	-40.0696	-39.0625	-40.1001	-37.8418	-40.1306	-29.2969	-40.0696	-25.0244	-40.1001	-45.166	-40.1001	-32.959	-40.1001	-57.9834	-40.1001	-51.8799	-40.1001
0.171	-18.3105	-40.1001	-20.752	-40.1001	-29.9072	-40.1001	-26.8555	-40.1001	-22.583	-40.1001	-19.5313	-40.1001	-39.6729	-40.1001	-65.3076	-40.1001	-47.6074	-40.1001	-40.2832	-40.1306	-37.2314	-40.1001	-44.5557	-40.1001	-47.6074	-40.1001	-33.5693	-40.1001	-40.2832	-40.0696	-50.0488	-40.1001	-40.8936	-40.1001	-44.5557	-40.1001	-65.918	-40.1001
0.1715	-17.7002	-40.1001	-19.5313	-40.1001	-18.3105	-40.1001	-17.7002	-40.1001	-33.5693	-40.0696	-27.4658	-40.1001	-39.6729	-40.0696	-103.149	-40.1001	-54.9316	-40.1306	-42.7246	-40.1001	-42.7246	-40.1001	-40.2832	-40.1001	-48.2178	-40.1001	-40.8936	-40.1001	-34.1797	-40.0696	-46.3867	-40.1306	-46.9971	-40.1306	-56.1523	-40.1306	-43.335	-40.1001
0.172	-17.7002	-40.0696	-15.8691	-40.1001	-32.3486	-40.0696	-18.3105	-40.1001	-27.4658	-40.1001	-28.0762	-40.0696	-53.7109	-40.0696	-83.6182	-40.1306	-66.5283	-40.1001	-46.3867	-40.1001	-42.1143	-40.1001	-40.2832	-40.1001	-46.3867	-40.1001	-28.0762	-40.1001	-39.6729	-40.1306	-40.2832	-40.0696	-42.1143	-40.1001	-51.8799	-40.1306	-52.4902	-40.1001
0.1725	-9.76563	-40.1001	-9.76563	-40.1001	-21.3623	-40.1306	-9.76563	-40.1001	-18.9209	-40.0696	-36.0107	-40.1001	-47.6074	-40.1001	-101.318	-40.1001	-56.7627	-40.0696	-42.7246	-40.1001	-45.166	-40.0696	-34.1797	-40.1001	-46.3867	-40.0696	-27.4658	-40.1001	-42.1143	-40.0696	-41.5039	-40.1001	-45.7764	-40.0696	-42.1143	-40.1001	-42.7246	-40.1001
0.173	-23.1934	-40.1611	-9.76563	-40.1306	-19.5313	-40.1001	-12.8174	-40.1001	-29.2969	-40.0696	-38.4521	-40.1001	-52.4902	-40.0696	-86.0596	-40.0696	-39.0625	-40.1001	-50.0488	-40.0696	-37.2314	-40.1001	-46.3867	-40.1306	-37.8418	-40.1306	-26.8555	-40.1001	-37.8418	-40.1001	-58.5938	-40.1001	-34.1797	-40.1001	-57.9834	-40.0696	-44.5557	-40.0696
0.1735	-14.6484	-40.1001	-18.9209	-40.0696	-35.4004	-40.1001	-18.9209	-40.1001	-17.0898	-40.0696	-26.8555	-40.0696	-50.6592	-40.1001	-85.4492	-40.0696	-45.166	-40.1306	-55.542	-40.0696	-32.959	-40.1306	-44.5557	-40.0696	-40.8936	-40.1306	-33.5693	-40.1001	-36.6211	-40.1001	-64.6973	-40.1001	-46.3867	-40.0696	-48.2178	-40.1001	-59.2041	-40.1001
0.174	-26.2451	-40.1001	-1.83105	-40.1001	-29.2969	-40.0696	-18.3105	-40.1001	-18.3105	-40.0696	-28.6865	-40.1001	-51.2695	-40.0696	-84.8389	-40.1306	-51.2695	-40.0696	-44.5557	-40.1001	-28.0762	-40.1306	-35.4004	-40.0696	-40.2832	-40.1001	-27.4658	-40.1001	-31.1279	-40.1001	-59.8145	-40.0696	-36.0107	-40.1001	-43.335	-40.1306	-68.3594	-40.1001
0.1745	-18.3105	-40.1001	-15.2588	-40.1001	-20.1416	-40.1306	-17.0898	-40.1001	-22.583	-40.0696	-29.9072	-40.1306	-37.2314	-40.1306	-122.07	-40.0696	-57.373	-40.1001	-52.4902	-40.1306	-44.5557	-40.1306	-25.0244	-40.0696	-31.7383	-40.1001	-21.9727	-40.1001	-32.3486	-40.1001	-53.1006	-40.1001	-34.1797	-40.1001	-39.0625	-40.1001	-61.6455	-40.1001
0.175	-21.3623	-40.0696	-20.752	-40.1001	-30.5176	-40.1001	-20.1416	-40.1001	-35.4004	-40.0696	-29.2969	-40.1001	-37.8418	-40.1001	-75.0732	-40.1001	-40.2832	-40.1306	-52.4902	-40.0696	-36.0107	-40.1001	-48.2178	-40.1001	-23.8037	-40.0696	-38.4521	-40.1306	-32.959	-40.1001	-37.8418	-40.1001	-30.5176	-40.1001	-45.166	-40.1001	-53.7109	-40.1306
0.1755	-23.8037	-40.0696	-21.9727	-40.1001	-27.4658	-40.1001	-18.3105	-40.1001	-16.4795	-40.1001	-14.0381	-40.1001	-50.6592	-40.1001	-61.0352	-40.1306	-49.4385	-40.1306	-65.3076	-40.1001	-36.6211	-40.1306	-41.5039	-40.1001	-47.6074	-40.1001	-51.2695	-40.1001	-34.79	-40.0696	-40.2832	-40.1001	-39.6729	-40.0696	-28.6865	-40.1001	-53.1006	-40.1001
0.176	-14.0381	-40.1001	-19.5313	-40.1306	-18.3105	-40.1001	-21.3623	-40.1001	-17.7002	-40.0696	-33.5693	-40.1001	-48.8281	-40.1001	-63.4766	-40.1001	-65.918	-40.1001	-49.4385	-40.1001	-36.6211	-40.1001	-44.5557	-40.1001	-38.4521	-40.1001	-45.166	-40.1001	-27.4658	-40.1306	-46.3867	-40.1001	-45.166	-40.1306	-56.7627	-40.1001	-53.1006	-40.0696
0.1765	-17.7002	-40.1306	-26.2451	-40.1001	-18.3105	-40.1001	-20.752	-40.1001	-15.2588	-40.1001	-14.0381	-40.1001	-59.2041	-40.0696	-75.6836	-40.1001	-55.542	-40.1001	-59.2041	-40.1001	-50.0488	-40.1001	-32.959	-40.1001	-27.4658	-40.0696	-36.0107	-40.0696	-42.1143	-40.1001	-56.7627	-40.1306	-56.1523	-40.0696	-57.373	-40.0696	-51.2695	-40.1001
0.177	-9.15527	-40.1001	-15.2588	-40.1001	-27.4658	-40.1001	-31.7383	-40.0696	-28.0762	-40.0696	-19.5313	-40.0696	-53.1006	-40.1001	-57.9834	-40.0696	-58.5938	-40.0696	-52.4902	-40.0696	-43.335	-40.1001	-35.4004	-40.1001	-31.1279	-40.0696	-39.0625	-40.1001	-36.0107	-40.1001	-48.8281	-40.1001	-44.5557	-40.0696	-51.2695	-40.1001	-60.4248	-40.1001
0.1775	-17.0898	-40.1001	-21.9727	-40.1001	-29.9072	-40.1001	-22.583	-40.1001	-15.8691	-40.0696	-15.2588	-40.1001	-50.0488	-40.1306	-45.7764	-40.1001	-83.0078	-40.1306	-57.373	-40.0696	-39.6729	-40.1306	-41.5039	-40.1001	-37.8418	-40.1001	-28.0762	-40.1001	-34.79	-40.1001	-61.0352	-40.1001	-50.0488	-40.1001	-34.79	-40.1001	-54.3213	-40.1001
0.178	-21.3623	-40.1306	-14.0381	-40.1001	-23.8037	-40.1001	-21.9727	-40.1001	-13.4277	-40.1001	-28.0762	-40.1001	-57.9834	-40.1306	-64.6973	-40.1001	-43.335	-40.1001	-67.1387	-40.1001	-36.6211	-40.1001	-40.8936	-40.1001	-34.79	-40.0696	-40.8936	-40.1001	-34.79	-40.1306	-41.5039	-40.1001	-37.8418	-40.0696	-39.0625	-40.1001	-46.9971	-40.1001
0.1785	-9.76563	-40.0696	-18.3105	-40.1001	-32.3486	-40.0696	-21.9727	-40.1001	-11.5967	-40.1001	-7.93457	-40.1001	-52.4902	-40.1001	-78.125	-40.1001	-45.166	-40.1001	-54.9316	-40.1001	-34.1797	-40.1001	-48.2178	-40.1001	-40.2832	-40.1306	-34.1797	-40.1001	-35.4004	-40.0696	-52.4902	-40.1001	-57.373	-40.1001	-42.1143	-40.1001	-76.2939	-40.1001
0.179	-25.6348	-40.0696	-18.9209	-40.1001	-32.959	-40.1001	-25.6348	-40.1001	-24.4141	-40.0696	-31.7383	-40.0696	-70.1904	-40.1001	-71.4111	-40.1001	-92.7734	-40.0696	-64.6973	-40.1001	-42.7246	-40.0696	-34.1797	-40.1001	-28.6865	-40.1001	-40.2832	-40.1001	-28.6865	-40.0696	-47.6074	-40.1001	-50.6592	-40.1306	-43.335	-40.1001	-65.3076	-40.1001
0.1795	-7.32422	-40.1001	-12.207	-40.1001	-14.0381	-40.1001	-32.959	-40.1306	-19.5313	-40.0696	-29.2969	-40.0696	-61.6455	-40.1001	-79.3457	-40.1001	-87.2803	-40.0696	-58.5938	-40.0696	-43.335	-40.1306	-39.0625	-40.1001	-44.5557	-40.1001	-36.0107	-40.1001	-35.4004	-40.1001	-42.7246	-40.0696	-40.8936	-40.1001	-45.166	-40.1001	-50.6592	-40.1001
0.18	-15.8691	-40.1001	-10.9863	-40.1001	-29.2969	-40.1001	-4.27246	-40.1001	-9.76563	-40.0696	-25.6348	-40.0696	-55.542	-40.1001	-72.0215	-40.1001	-81.7871	-40.1001	-48.8281	-40.1001	-30.5176	-40.1001	-51.8799	-40.1001	-29.2969	-40.1001	-32.3486	-40.1001	-25.6348	-40.1001	-39.0625	-40.1001	-52.4902	-40.1001	-38.4521	-40.1306	-54.9316	-40.1306
0.1805	-9.15527	-40.1306	-28.0762	-40.1001	-34.79	-40.1306	-19.5313	-40.1306	-20.752	-40.1001	-42.7246	-40.1001	-49.4385	-40.1306	-72.0215	-40.1001	-79.3457	-40.1001	-61.0352	-40.1001	-26.8555	-40.1001	-61.0352	-40.1001	-32.3486	-40.1001	-46.3867	-40.1306	-26.2451	-40.1001	-45.7764	-40.1001	-48.8281	-40.1001	-50.6592	-40.1001	-54.3213	-40.0696
0.181	-9.15527	-40.1306	-26.2451	-40.1001	-24.4141	-40.1001	-9.15527	-40.1001	-23.1934	-40.1001	-28.0762	-40.1001	-50.6592	-40.1001	-78.125	-40.1001	-62.2559	-40.1001	-48.8281	-40.1306	-33.5693	-40.1001	-54.3213	-40.1001	-32.3486	-40.0696	-44.5557	-40.1001	-20.752	-40.0696	-47.6074	-40.1001	-37.8418	-40.1001	-30.5176	-40.0696	-46.9971	-40.1001
0.1815	-14.6484	-40.1001	-34.79	-40.0696	-30.5176	-40.0696	-15.2588	-40.1001	-12.8174	-40.0696	-37.8418	-40.1001	-49.4385	-40.1001	-62.2559	-40.0696	-67.1387	-40.1001	-56.7627	-40.1001	-33.5693	-40.1306	-57.373	-40.1001	-34.1797	-40.1001	-43.335	-40.1001	-38.4521	-40.1001	-63.4766	-40.1001	-46.3867	-40.1001	-52.4902	-40.1001	-52.4902	-40.1001
0.182	-27.4658	-40.1001	-14.6484	-40.0696	-32.959	-40.1306	-21.9727	-40.1001	-20.752	-40.1306	-31.1279	-40.1001	-52.4902	-40.1306	-94.6045	-40.1001	-67.1387	-40.1001	-53.7109	-40.1001	-32.959	-40.1001	-56.1523	-40.1001	-42.1143	-40.1001	-38.4521	-40.1001	-43.335	-40.1001	-63.4766	-40.1306	-46.3867	-40.0696	-42.1143	-40.1306	-63.4766	-40.1306
0.1825	-6.10352	-40.1001	-1.2207	-40.1001	-18.3105	-40.0696	-17.7002	-40.1001	-26.8555	-40.1001	-33.5693	-40.0696	-56.7627	-40.1001	-48.2178	-40.1001	-65.918	-40.1001	-54.9316	-40.1001	-41.5039	-40.0696	-40.2832	-40.1001	-41.5039	-40.1001	-26.2451	-40.1001	-29.9072	-40.1001	-69.5801	-40.1001	-53.1006	-40.1306	-58.5938	-40.1001	-57.9834	-40.0696
0.183	-18.3105	-40.1001	-30.5176	-40.1001	-31.1279	-40.0696	-15.8691	-40.1001	-15.2588	-40.1001	-27.4658	-40.1001	-43.9453	-40.1611	-72.0215	-40.1001	-42.7246	-40.1001	-52.4902	-40.1001	-45.7764	-40.1001	-51.8799	-40.1001	-36.0107	-40.1001	-21.9727	-40.0696	-23.8037	-40.1001	-61.0352	-40.0696	-39.6729	-40.1001	-40.2832	-40.1001	-63.4766	-40.1001
0.1835	-9.15527	-40.1001	-9.76563	-40.1306	-27.4658	-40.1306	-13.4277	-40.0696	-15.2588	-40.1001	-46.9971	-40.1001	-45.166	-40.1001	-85.4492	-40.1306	-51.8799	-40.1306	-59.2041	-40.0696	-32.959	-40.1306	-48.8281	-40.1306	-37.8418	-40.0696	-36.0107	-40.0696	-39.6729	-40.1306	-48.2178	-40.1306	-39.0625	-40.1306	-52.4902	-40.1001	-61.0352	-40.1001
0.184	-12.207	-40.1001	-6.71387	-40.1001	-37.2314	-40.1001	-14.0381	-40.1001	-21.3623	-40.1001	-35.4004	-40.1001	-38.4521	-40.1001	-91.5527	-40.1306	-46.9971	-40.1001	-71.4111	-40.1306	-32.3486	-40.1001	-40.8936	-40.1306	-45.166	-40.1306	-40.2832	-40.1001	-40.2832	-40.0696	-57.373	-40.1001	-40.2832	-40.1306	-38.4521	-40.0696	-57.9834	-40.0696
0.1845	-10.9863	-40.1306	-28.0762	-40.0696	-32.3486	-40.1306	-26.2451	-40.1001	-18.9209	-40.1001	-40.8936	-40.1001	-47.6074	-40.1001	-73.8525	-40.1001	-45.7764	-40.1001	-54.9316	-40.1001	-42.1143	-40.0696	-41.5039	-40.1001	-42.7246	-40.1001	-37.2314	-40.1001	-35.4004	-40.1001	-54.3213	-40.1001	-45.166	-40.1306	-60.4248	-40.0696	-56.7627	-40.1001
0.185	-23.8037	-40.1001	-9.76563	-40.1001	-36.6211	-40.1001	-14.6484	-40.1306	-31.1279	-40.1001	-23.8037	-40.1001	-56.1523	-40.1001	-77.5146	-40.1001	-64.0869	-40.0696	-53.1006	-40.1001	-36.0107	-40.1001	-47.6074	-40.1001	-35.4004	-40.1306	-30.5176	-40.1001	-37.8418	-40.1001	-43.9453	-40.1306	-50.6592	-40.1001	-29.9072	-40.1001	-60.4248	-40.1001
0.1855	-12.207	-40.1001	-17.0898	-40.1001	-14.0381	-40.1306	-7.93457	-40.1001	-27.4658	-40.1306	-20.752	-40.1001	-53.1006	-40.1306	-98.2666	-40.0696	-73.8525	-40.1001	-46.3867	-40.0696	-30.5176	-40.1001	-54.9316	-40.1001	-39.0625	-40.0696	-30.5176	-40.1001	-45.166	-40.1001	-51.2695	-40.1001	-48.2178	-40.1001	-33.5693	-40.1001	-51.8799	-40.1001
0.186	-28.0762	-40.1306	-14.0381	-40.0696	-31.7383	-40.1001	-8.54492	-40.0391	-29.9072	-40.1001	-24.4141	-40.0696	-42.7246	-40.1306	-87.2803	-40.1001	-54.3213	-40.1001	-44.5557	-40.1001	-35.4004	-40.0696	-49.4385	-40.1001	-20.752	-40.1001	-42.7246	-40.1001	-39.6729	-40.1001	-55.542	-40.1001	-35.4004	-40.1001	-47.6074	-40.1001	-47.6074	-40.1001
0.1865	-9.15527	-40.1001	-18.9209	-40.1001	-23.1934	-40.1001	-15.2588	-40.0696	-32.959	-40.1001	-36.0107	-40.0696	-42.1143	-40.1001	-76.9043	-40.1001	-53.7109	-40.0696	-51.2695	-40.1001	-36.6211	-40.1001	-30.5176	-40.1001	-31.1279	-40.1001	-43.335	-40.1306	-35.4004	-40.1001	-58.5938	-40.0696	-49.4385	-40.1306	-55.542	-40.1001	-50.0488	-40.1001
0.187	-4.88281	-40.1001	-24.4141	-40.0696	-25.0244	-40.1306	-20.1416	-40.1001	-18.3105	-40.1001	-46.9971	-40.1001	-53.1006	-40.1001	-86.0596	-40.1001	-54.9316	-40.0696	-59.2041	-40.1001	-28.0762	-40.0696	-37.2314	-40.1001	-44.5557	-40.0696	-33.5693	-40.0696	-34.1797	-40.1001	-46.9971	-40.1306	-43.335	-40.1306	-40.8936	-40.1306	-48.2178	-40.1001
0.1875	-18.3105	-40.1001	-25.0244	-40.1001	-28.6865	-40.1001	-20.752	-40.1001	-28.6865	-40.1001	-42.7246	-40.1001	-41.5039	-40.1001	-96.4355	-40.0696	-64.6973	-40.1001	-50.6592	-40.1306	-34.1797	-40.1001	-46.3867	-40.1001	-43.335	-40.1306	-33.5693	-40.1001	-36.0107	-40.0696	-35.4004	-40.0696	-32.959	-40.0696	-41.5039	-40.1306	-57.9834	-40.0696
0.188	-8.54492	-40.1001	-20.1416	-40.1001	-13.4277	-40.1001	-18.3105	-40.0696	-23.1934	-40.1001	-29.2969	-40.0696	-32.959	-40.1001	-104.98	-40.1306	-60.4248	-40.1001	-54.3213	-40.1001	-43.335	-40.1306	-46.3867	-40.0696	-40.8936	-40.1001	-34.79	-40.0696	-37.2314	-40.1001	-42.1143	-40.0696	-57.373	-40.1001	-45.7764	-40.1001	-56.1523	-40.1001
0.1885	-18.3105	-40.1306	-19.5313	-40.1001	-31.7383	-40.1001	-10.376	-40.1001	-14.6484	-40.1001	-43.9453	-40.1001	-53.7109	-40.1001	-101.929	-40.1001	-40.2832	-40.1001	-51.8799	-40.1001	-24.4141	-40.0696	-32.3486	-40.1001	-50.6592	-40.1001	-27.4658	-40.0696	-40.2832	-40.1001	-30.5176	-40.1306	-48.8281	-40.1306	-46.3867	-40.1001	-54.3213	-40.1001
0.189	-20.1416	-40.1611	-21.3623	-40.1306	-24.4141	-40.1306	-21.3623	-40.0696	-28.0762	-40.1001	-31.7383	-40.1001	-45.166	-40.0696	-115.356	-40.1306	-34.1797	-40.1001	-61.6455	-40.1001	-36.6211	-40.0696	-38.4521	-40.1001	-39.0625	-40.0696	-37.8418	-40.1306	-34.79	-40.1001	-53.1006	-40.1001	-36.6211	-40.1001	-48.8281	-40.1001	-59.2041	-40.0696
0.1895	-22.583	-40.1001	-6.71387	-40.1001	-22.583	-40.1306	-32.959	-40.1001	-18.3105	-40.1001	-31.7383	-40.0696	-42.7246	-40.1001	-102.539	-40.1306	-61.0352	-40.1001	-69.5801	-40.1001	-29.9072	-40.0696	-50.6592	-40.1001	-41.5039	-40.1001	-29.2969	-40.0696	-43.335	-40.1001	-48.2178	-40.1001	-43.9453	-40.0696	-66.5283	-40.1001	-56.7627	-40.0696
0.19	-10.9863	-40.1001	-10.376	-40.0696	-21.9727	-40.1001	-36.0107	-40.1001	-15.8691	-40.1001	-25.0244	-40.1001	-46.9971	-40.1306	-110.474	-40.1001	-65.3076	-40.1001	-64.0869	-40.1001	-33.5693	-40.1001	-39.6729	-40.1001	-45.7764	-40.1001	-34.1797	-40.1001	-30.5176	-40.1001	-34.1797	-40.1001	-54.3213	-40.1306	-59.2041	-40.1001	-52.4902	-40.0696
0.1905	-17.7002	-40.1001	-17.0898	-40.1001	-21.9727	-40.1001	-26.8555	-40.1001	-21.9727	-40.0696	-29.9072	-40.0696	-40.2832	-40.1306	-118.408	-40.1001	-64.6973	-40.1001	-59.2041	-40.1001	-43.335	-40.1001	-42.7246	-40.1001	-47.6074	-40.1001	-33.5693	-40.1001	-43.9453	-40.1001	-28.0762	-40.1001	-40.8936	-40.1001	-54.9316	-40.0696	-46.9971	-40.1001
0.191	-20.1416	-40.0696	-12.207	-40.1001	-35.4004	-40.1001	-25.0244	-40.1001	-15.2588	-40.1001	-37.2314	-40.0696	-32.3486	-40.0696	-95.2148	-40.1001	-66.5283	-40.1001	-73.8525	-40.1001	-35.4004	-40.1001	-42.1143	-40.1306	-46.9971	-40.1306	-36.0107	-40.1001	-42.1143	-40.1306	-36.0107	-40.1001	-40.2832	-40.0696	-49.4385	-40.1306	-59.2041	-40.1001
0.1915	-21.3623	-40.1001	-19.5313	-40.0696	-7.93457	-40.1001	-15.8691	-40.1306	-17.7002	-40.0696	-31.1279	-40.0696	-46.9971	-40.1001	-100.708	-40.1001	-51.8799	-40.1306	-52.4902	-40.1001	-45.166	-40.1306	-48.2178	-40.1001	-46.9971	-40.1001	-29.2969	-40.1001	-36.6211	-40.1001	-46.9971	-40.1001	-43.9453	-40.1306	-48.8281	-40.1001	-57.9834	-40.1001
0.192	-19.5313	-40.1001	-22.583	-40.1306	-20.1416	-40.1306	-17.0898	-40.1001	-13.4277	-40.1001	-29.2969	-40.0696	-54.3213	-40.1001	-86.6699	-40.1001	-63.4766	-40.1306	-53.7109	-40.1001	-33.5693	-40.1001	-48.8281	-40.1306	-38.4521	-40.1306	-35.4004	-40.1001	-25.0244	-40.1001	-42.1143	-40.1001	-35.4004	-40.1001	-41.5039	-40.0696	-59.8145	-40.1001
0.1925	-28.6865	-40.1306	-8.54492	-40.0696	-28.6865	-40.1001	-16.4795	-40.1001	-18.3105	-40.1001	-25.0244	-40.1001	-50.0488	-40.0696	-71.4111	-40.1001	-73.2422	-40.1306	-64.0869	-40.0696	-46.9971	-40.1306	-40.8936	-40.1001	-45.7764	-40.1001	-20.1416	-40.1001	-42.1143	-40.1306	-43.9453	-40.0696	-39.6729	-40.0696	-46.3867	-40.1001	-43.9453	-40.1001
0.193	-9.76563	-40.1001	-1.83105	-40.1001	-28.6865	-40.1306	-20.752	-40.1001	-20.1416	-40.0696	-31.7383	-40.1001	-50.6592	-40.0696	-91.5527	-40.1001	-75.0732	-40.1001	-50.6592	-40.0696	-35.4004	-40.0696	-54.3213	-40.1001	-36.0107	-40.1001	-37.8418	-40.0696	-39.0625	-40.1001	-55.542	-40.1001	-37.8418	-40.1001	-44.5557	-40.1001	-62.8662	-40.1001
0.1935	-17.7002	-40.0696	-7.93457	-40.0696	-26.8555	-40.0696	-20.1416	-40.1001	-16.4795	-40.1001	-40.8936	-40.1001	-57.9834	-40.1001	-114.136	-40.0696	-59.8145	-40.1306	-61.0352	-40.1001	-37.8418	-40.1001	-36.0107	-40.1001	-49.4385	-40.1001	-46.3867	-40.1001	-35.4004	-40.0696	-51.2695	-40.1001	-40.8936	-40.0696	-52.4902	-40.1001	-58.5938	-40.1001
0.194	-26.8555	-40.1001	-10.376	-40.1001	-14.0381	-40.1001	-19.5313	-40.0696	-12.207	-40.1001	-29.2969	-40.0696	-37.8418	-40.1306	-85.4492	-40.1001	-75.0732	-40.1001	-65.3076	-40.1001	-39.0625	-40.1001	-53.7109	-40.1001	-45.166	-40.1306	-27.4658	-40.1001	-36.6211	-40.0696	-49.4385	-40.1001	-39.0625	-40.1001	-57.373	-40.1001	-64.6973	-40.1001
0.1945	-17.0898	-40.1306	-24.4141	-40.1001	-23.1934	-40.1001	-9.76563	-40.1001	-21.9727	-40.1001	-37.2314	-40.1001	-37.2314	-40.1611	-104.37	-40.1001	-47.6074	-40.1001	-65.918	-40.1001	-46.9971	-40.1306	-39.6729	-40.1001	-39.0625	-40.1001	-39.6729	-40.1001	-33.5693	-40.1001	-95.8252	-40.1001	-32.3486	-40.1001	-49.4385	-40.1306	-62.2559	-40.1001
0.195	-21.9727	-40.1001	-18.3105	-40.1001	-37.8418	-40.1306	-19.5313	-40.1001	-23.1934	-40.0696	-26.2451	-40.1001	-39.0625	-40.1001	-85.4492	-40.1001	-47.6074	-40.1001	-78.7354	-40.1306	-37.2314	-40.1001	-42.1143	-40.1001	-30.5176	-40.1001	-38.4521	-40.1001	-22.583	-40.1001	-60.4248	-40.1001	-39.0625	-40.1306	-49.4385	-40.1306	-56.1523	-40.0696
0.1955	-26.8555	-40.1001	-18.9209	-40.1001	-31.1279	-40.1001	-14.6484	-40.1306	-4.88281	-40.0696	-24.4141	-40.0696	-48.2178	-40.1001	-106.201	-40.1001	-53.7109	-40.1001	-97.0459	-40.0696	-34.1797	-40.1306	-41.5039	-40.1001	-32.959	-40.1001	-42.7246	-40.1001	-36.0107	-40.0696	-57.9834	-40.0696	-34.79	-40.1001	-51.2695	-40.0696	-52.4902	-40.1001
0.196	-27.4658	-40.1001	-11.5967	-40.1001	-12.8174	-40.1001	-22.583	-40.1001	-26.8555	-40.0696	-34.1797	-40.0696	-37.8418	-40.0696	-75.0732	-40.1306	-82.3975	-40.1001	-81.1768	-40.0696	-37.2314	-40.1306	-45.166	-40.1306	-34.79	-40.1306	-32.3486	-40.1306	-34.1797	-40.0696	-63.4766	-40.1001	-42.1143	-40.1001	-54.3213	-40.1001	-47.6074	-40.1306
0.1965	-20.1416	-40.1001	-29.9072	-40.0696	-19.5313	-40.1001	-14.0381	-40.1001	-26.8555	-40.0696	-37.2314	-40.1001	-54.3213	-40.1001	-82.3975	-40.1306	-64.0869	-40.1001	-90.332	-40.1001	-43.9453	-40.1001	-52.4902	-40.1001	-38.4521	-40.1001	-57.373	-40.0696	-34.1797	-40.0696	-57.9834	-40.1306	-50.0488	-40.1001	-60.4248	-40.1001	-49.4385	-40.0696
0.197	-14.6484	-40.1001	-20.752	-40.1306	-23.1934	-40.1001	-19.5313	-40.0696	-25.6348	-40.1001	-38.4521	-40.1001	-46.9971	-40.0696	-109.863	-40.1306	-45.7764	-40.1001	-90.332	-40.0696	-38.4521	-40.1001	-50.0488	-40.1001	-35.4004	-40.1001	-40.2832	-40.0696	-43.9453	-40.1001	-48.2178	-40.1001	-51.2695	-40.0696	-56.1523	-40.1001	-53.1006	-40.1001
0.1975	-17.0898	-40.1001	-23.1934	-40.1306	-27.4658	-40.0696	-15.8691	-40.0696	-21.3623	-40.1306	-28.6865	-40.0696	-47.6074	-40.1001	-103.76	-40.1001	-57.373	-40.1001	-86.0596	-40.1001	-44.5557	-40.1306	-62.2559	-40.1306	-41.5039	-40.1001	-42.7246	-40.1001	-32.3486	-40.1306	-64.6973	-40.1001	-37.2314	-40.1001	-34.1797	-40.1001	-73.2422	-40.1001
0.198	-14.0381	-40.1001	-28.0762	-40.1001	-20.1416	-40.1001	-28.6865	-40.1306	-35.4004	-40.1001	-28.0762	-40.1001	-58.5938	-40.1001	-114.136	-40.1001	-49.4385	-40.0696	-88.501	-40.1001	-40.8936	-40.1001	-48.8281	-40.0696	-38.4521	-40.1001	-59.2041	-40.1001	-26.2451	-40.0696	-54.3213	-40.1001	-48.2178	-40.1001	-48.2178	-40.1306	-50.0488	-40.1001
0.1985	-20.752	-40.1001	-18.9209	-40.1001	-29.2969	-40.0696	-18.9209	-40.1001	-37.8418	-40.1001	-28.0762	-40.0696	-48.8281	-40.1001	-96.4355	-40.1001	-39.0625	-40.1001	-90.9424	-40.1306	-41.5039	-40.0696	-53.7109	-40.1306	-28.6865	-40.1306	-37.2314	-40.1001	-27.4658	-40.1001	-60.4248	-40.1001	-49.4385	-40.1306	-35.4004	-40.1001	-55.542	-40.0696
0.199	-28.6865	-40.0696	-13.4277	-40.1001	-13.4277	-40.1001	-24.4141	-40.1001	-23.1934	-40.1306	-22.583	-40.1001	-48.8281	-40.1001	-100.708	-40.1001	-50.0488	-40.1001	-79.3457	-40.1001	-38.4521	-40.1001	-45.7764	-40.1001	-37.2314	-40.1001	-43.335	-40.0391	-37.2314	-40.1001	-61.0352	-40.1001	-45.166	-40.1001	-34.79	-40.1306	-67.1387	-40.1306
0.1995	-15.8691	-40.1306	-24.4141	-40.1001	-18.3105	-40.0696	-26.8555	-40.1001	-28.0762	-40.1001	-29.2969	-40.1306	-43.9453	-40.1001	-80.5664	-40.1306	-37.2314	-40.1001	-97.0459	-40.1001	-29.2969	-40.1001	-59.2041	-40.1001	-36.6211	-40.1001	-36.6211	-40.1001	-42.7246	-40.1001	-60.4248	-40.1001	-41.5039	-40.1001	-42.1143	-40.1001	-53.1006	-40.0696
0.2	-23.8037	-40.1306	-11.5967	-40.1306	-25.0244	-40.1001	-22.583	-40.1001	-26.2451	-40.1306	-29.9072	-40.1001	-53.1006	-40.1001	-80.5664	-40.1306	-49.4385	-40.1001	-79.9561	-40.0696	-31.1279	-40.1001	-41.5039	-40.1001	-37.8418	-40.1001	-43.9453	-40.1001	-37.2314	-40.1001	-67.749	-40.0696	-44.5557	-40.1001	-46.3867	-40.0696	-58.5938	-40.1001
0.2005	-23.8037	-40.1001	-16.4795	-40.1001	-28.6865	-40.1001	-26.2451	-40.0696	-20.752	-40.1001	-18.3105	-40.1001	-45.166	-40.1001	-72.0215	-40.1001	-88.501	-40.1001	-73.2422	-40.1306	-29.2969	-40.1001	-32.959	-40.1001	-28.6865	-40.1001	-33.5693	-40.1306	-28.0762	-40.1001	-62.8662	-40.1001	-49.4385	-40.1001	-46.9971	-40.1001	-59.8145	-40.1001
0.201	-33.5693	-40.1001	-28.6865	-40.1001	-22.583	-40.1001	-7.93457	-40.0696	-26.2451	-40.1001	-23.1934	-40.1306	-49.4385	-40.1306	-96.4355	-40.1001	-75.6836	-40.1001	-55.542	-40.1001	-28.6865	-40.1001	-60.4248	-40.1001	-30.5176	-40.1001	-43.9453	-40.1001	-37.8418	-40.1001	-64.6973	-40.1306	-50.0488	-40.0696	-37.8418	-40.1001	-59.2041	-40.1001
0.2015	-17.7002	-40.1001	-10.376	-40.1001	-36.0107	-40.1001	-14.6484	-40.1001	-16.4795	-40.1306	-20.1416	-40.1001	-45.166	-40.1001	-101.318	-40.1001	-74.4629	-40.0391	-70.8008	-40.1001	-29.2969	-40.1001	-53.7109	-40.1306	-34.79	-40.1001	-35.4004	-40.1001	-31.7383	-40.1306	-52.4902	-40.1001	-40.2832	-40.1001	-39.6729	-40.0696	-58.5938	-40.1001
0.202	-18.9209	-40.1001	-17.0898	-40.1001	-14.0381	-40.0696	-17.7002	-40.0696	-28.0762	-40.1001	-22.583	-40.0696	-57.9834	-40.1001	-86.6699	-40.0696	-73.8525	-40.1001	-57.9834	-40.1001	-23.1934	-40.1306	-49.4385	-40.1001	-36.0107	-40.1001	-36.6211	-40.1001	-40.8936	-40.1001	-50.6592	-40.1001	-40.2832	-40.1001	-37.8418	-40.1001	-51.8799	-40.1001
0.2025	-16.4795	-40.1001	-28.0762	-40.1001	-21.9727	-40.0696	-11.5967	-40.1001	-17.7002	-40.1001	-18.3105	-40.1001	-47.6074	-40.1001	-101.318	-40.0696	-62.8662	-40.1001	-57.9834	-40.1001	-32.3486	-40.1001	-58.5938	-40.1001	-33.5693	-40.0696	-34.79	-40.1001	-32.959	-40.1001	-48.2178	-40.0696	-52.4902	-40.1306	-39.0625	-40.1306	-64.0869	-40.1001
0.203	-23.1934	-40.0696	-23.1934	-40.1001	-15.2588	-40.1001	-7.93457	-40.1306	-23.1934	-40.1001	-28.0762	-40.1001	-42.7246	-40.1001	-125.122	-40.1306	-58.5938	-40.1001	-53.7109	-40.1001	-39.0625	-40.1001	-60.4248	-40.1001	-13.4277	-40.0696	-40.2832	-40.1001	-31.7383	-40.0696	-51.2695	-40.1001	-50.0488	-40.1306	-38.4521	-40.0696	-62.2559	-40.1001
0.2035	-13.4277	-40.1001	-29.2969	-40.1306	-20.752	-40.1001	-23.1934	-40.1001	-14.6484	-40.1001	-18.3105	-40.1001	-43.335	-40.1001	-111.084	-40.1001	-74.4629	-40.1306	-71.4111	-40.1001	-40.2832	-40.0696	-53.1006	-40.1001	-32.959	-40.1001	-44.5557	-40.1001	-46.3867	-40.1001	-50.0488	-40.0696	-51.2695	-40.1001	-40.8936	-40.1001	-48.2178	-40.1306
0.204	-20.1416	-40.1001	-17.7002	-40.1001	-32.3486	-40.1001	-17.7002	-40.0696	-14.6484	-40.1001	-17.0898	-40.1001	-58.5938	-40.1001	-110.474	-40.1306	-71.4111	-40.1001	-85.4492	-40.1001	-42.1143	-40.1001	-53.7109	-40.1306	-20.752	-40.0696	-33.5693	-40.1001	-42.1143	-40.1001	-53.7109	-40.0696	-48.8281	-40.1306	-44.5557	-40.0696	-51.8799	-40.1001
0.2045	-4.27246	-40.1001	-23.8037	-40.1001	-22.583	-40.1001	-15.8691	-40.1001	-17.0898	-40.1001	-12.207	-40.1001	-54.9316	-40.1001	-117.798	-40.1001	-70.1904	-40.1001	-65.918	-40.1001	-30.5176	-40.1001	-48.8281	-40.1306	-23.8037	-40.0696	-34.79	-40.1001	-44.5557	-40.1001	-54.3213	-40.1306	-45.7764	-40.1001	-45.166	-40.0696	-61.6455	-40.1001
0.205	-21.9727	-40.1306	-18.3105	-40.1001	-15.8691	-40.1001	-5.49316	-40.0696	-29.2969	-40.1306	-26.2451	-40.1001	-63.4766	-40.1001	-110.474	-40.1001	-64.0869	-40.1001	-89.1113	-40.0696	-21.9727	-40.1306	-45.7764	-40.1001	-37.8418	-40.1001	-36.6211	-40.1306	-46.9971	-40.1001	-53.7109	-40.1001	-39.6729	-40.1001	-34.79	-40.1001	-50.0488	-40.0696
0.2055	-13.4277	-40.1001	-20.1416	-40.0696	-22.583	-40.1001	-9.76563	-40.0696	-37.8418	-40.1001	-29.2969	-40.1001	-52.4902	-40.0696	-101.318	-40.1001	-68.3594	-40.0696	-79.3457	-40.0696	-18.3105	-40.1001	-47.6074	-40.0696	-37.8418	-40.1001	-48.2178	-40.1001	-41.5039	-40.1001	-47.6074	-40.1001	-39.6729	-40.1001	-43.9453	-40.1001	-30.5176	-40.0696
0.206	-10.376	-40.1001	-19.5313	-40.1001	-23.8037	-40.1001	-17.7002	-40.1001	-31.7383	-40.1001	-28.0762	-40.1001	-55.542	-40.1001	-111.084	-40.0696	-50.6592	-40.1001	-75.0732	-40.1001	-33.5693	-40.1001	-49.4385	-40.1001	-34.1797	-40.1001	-39.0625	-40.1306	-50.0488	-40.1001	-51.2695	-40.0696	-42.1143	-40.1306	-43.9453	-40.1001	-53.1006	-40.1001
0.2065	-25.6348	-40.1001	-17.7002	-40.1001	-22.583	-40.1001	-10.9863	-40.0696	-14.0381	-40.1001	-18.3105	-40.0696	-42.7246	-40.1001	-106.201	-40.1001	-57.9834	-40.1001	-57.373	-40.1001	-16.4795	-40.0696	-65.918	-40.1001	-29.9072	-40.1001	-39.6729	-40.0696	-29.2969	-40.1001	-55.542	-40.1001	-37.2314	-40.1001	-53.1006	-40.1001	-52.4902	-40.0696
0.207	-27.4658	-40.1001	-15.2588	-40.1001	-13.4277	-40.1001	-20.1416	-40.1001	-9.76563	-40.1001	-17.0898	-40.1306	-32.959	-40.0696	-113.525	-40.0696	-50.6592	-40.1001	-74.4629	-40.0696	-28.0762	-40.1306	-64.0869	-40.1001	-42.1143	-40.1001	-40.8936	-40.1001	-44.5557	-40.1001	-42.7246	-40.0696	-34.79	-40.1306	-43.9453	-40.1001	-56.1523	-40.1001
0.2075	-22.583	-40.1001	-23.1934	-40.0696	-17.7002	-40.1001	-18.3105	-40.1001	-43.9453	-40.1001	-24.4141	-40.0696	-34.1797	-40.1001	-118.408	-40.1001	-69.5801	-40.1001	-71.4111	-40.1001	-22.583	-40.1306	-48.8281	-40.1001	-45.7764	-40.1001	-34.79	-40.1001	-30.5176	-40.1001	-48.8281	-40.1001	-35.4004	-40.1001	-48.8281	-40.1001	-53.1006	-40.1001
0.208	-26.8555	-40.1001	-21.9727	-40.1001	-30.5176	-40.1001	-18.3105	-40.1001	-25.0244	-40.1001	-26.8555	-40.1001	-49.4385	-40.1001	-108.032	-40.1001	-54.9316	-40.1306	-76.9043	-40.1306	-29.9072	-40.1001	-50.0488	-40.0696	-36.6211	-40.1001	-39.0625	-40.0696	-40.8936	-40.1001	-43.335	-40.0696	-49.4385	-40.0696	-54.3213	-40.1001	-46.3867	-40.1001
0.2085	-11.5967	-40.1001	-25.0244	-40.1001	-28.6865	-40.1001	-25.0244	-40.0696	-20.752	-40.1306	-11.5967	-40.1306	-45.7764	-40.1001	-111.694	-40.1001	-51.2695	-40.1001	-100.098	-40.1001	-25.0244	-40.1001	-51.8799	-40.0391	-47.6074	-40.1001	-36.0107	-40.1001	-38.4521	-40.1001	-36.0107	-40.1001	-36.6211	-40.1001	-50.6592	-40.0696	-47.6074	-40.1306
0.209	-9.76563	-40.1306	-18.9209	-40.1001	-22.583	-40.1306	-15.2588	-40.0696	-21.9727	-40.1001	-33.5693	-40.1001	-48.8281	-40.1001	-91.5527	-40.1306	-39.0625	-40.0696	-93.9941	-40.1001	-25.0244	-40.1001	-49.4385	-40.1306	-34.1797	-40.1001	-39.6729	-40.1001	-45.7764	-40.1001	-54.3213	-40.0696	-39.0625	-40.1001	-58.5938	-40.1001	-45.7764	-40.1001
0.2095	-30.5176	-40.1306	-20.1416	-40.1001	-24.4141	-40.1001	-26.2451	-40.1001	-29.9072	-40.1306	-19.5313	-40.1001	-47.6074	-40.0696	-83.6182	-40.0696	-56.7627	-40.0696	-113.525	-40.0696	-41.5039	-40.0696	-59.8145	-40.0696	-37.2314	-40.1306	-39.0625	-40.1001	-36.0107	-40.1001	-39.0625	-40.1001	-43.335	-40.0696	-40.8936	-40.1001	-59.2041	-40.0696
0.21	-20.1416	-40.0696	-17.7002	-40.1001	-20.1416	-40.1001	-10.9863	-40.1001	-37.2314	-40.1306	-23.1934	-40.1001	-53.7109	-40.0696	-83.6182	-40.1306	-36.0107	-40.1001	-65.918	-40.1001	-32.3486	-40.1306	-42.1143	-40.1001	-33.5693	-40.1001	-36.0107	-40.1306	-50.0488	-40.1306	-56.1523	-40.0696	-29.9072	-40.1001	-53.1006	-40.1001	-59.8145	-40.1001
0.2105	-14.6484	-40.1306	-31.7383	-40.0696	-24.4141	-40.1001	-23.8037	-40.1306	-29.2969	-40.1001	-32.959	-40.1001	-54.3213	-40.0696	-97.0459	-40.0696	-62.2559	-40.1001	-69.5801	-40.1001	-32.959	-40.1001	-46.9971	-40.1001	-41.5039	-40.1001	-37.2314	-40.1001	-51.2695	-40.1001	-52.4902	-40.1001	-34.1797	-40.1306	-46.9971	-40.1001	-50.6592	-40.1306
0.211	-32.959	-40.1001	-11.5967	-40.0391	-23.1934	-40.1001	-23.8037	-40.1001	-15.8691	-40.0696	-32.959	-40.1001	-42.7246	-40.1306	-84.8389	-40.0696	-63.4766	-40.1001	-81.7871	-40.1001	-36.6211	-40.1001	-49.4385	-40.1306	-36.6211	-40.1001	-28.0762	-40.1001	-45.166	-40.1001	-56.1523	-40.1001	-34.79	-40.1306	-48.2178	-40.1001	-42.1143	-40.1001
0.2115	-18.3105	-40.1306	-25.0244	-40.1306	-13.4277	-40.1611	-26.2451	-40.1001	-20.752	-40.0696	-34.79	-40.1001	-34.1797	-40.1001	-79.9561	-40.1001	-70.8008	-40.1001	-108.032	-40.1306	-31.1279	-40.1001	-40.2832	-40.1001	-34.1797	-40.1001	-26.2451	-40.0696	-23.1934	-40.1306	-56.7627	-40.1001	-50.0488	-40.0696	-59.8145	-40.1306	-49.4385	-40.1001
0.212	-25.0244	-40.1001	-20.752	-40.1001	-8.54492	-40.1001	-23.8037	-40.1306	-17.7002	-40.1001	-24.4141	-40.1306	-43.9453	-40.1001	-88.501	-40.1306	-36.6211	-40.1001	-84.2285	-40.1306	-40.8936	-40.0696	-46.9971	-40.1001	-45.7764	-40.1001	-33.5693	-40.1001	-23.8037	-40.0696	-54.3213	-40.1001	-43.9453	-40.1001	-45.7764	-40.1001	-50.0488	-40.0696
0.2125	-42.1143	-40.1306	-3.66211	-40.1001	-40.2832	-40.0696	-21.9727	-40.0696	-12.8174	-40.0696	-35.4004	-40.1001	-40.2832	-40.0696	-110.474	-40.1001	-54.3213	-40.1001	-43.9453	-40.1001	-34.1797	-40.1001	-45.7764	-40.1001	-42.1143	-40.1001	-28.0762	-40.1001	-40.2832	-40.1001	-47.6074	-40.1306	-33.5693	-40.1001	-42.7246	-40.0696	-53.1006	-40.0696
0.213	-45.166	-40.1001	-10.376	-40.1001	-21.3623	-40.1001	-6.71387	-40.0696	-28.0762	-40.1001	-25.0244	-40.0696	-45.166	-40.1001	-116.577	-40.1001	-62.2559	-40.1001	-43.335	-40.0696	-29.2969	-40.0696	-47.6074	-40.0696	-40.8936	-40.1001	-31.1279	-40.0696	-45.166	-40.1001	-55.542	-40.1001	-48.8281	-40.0696	-51.8799	-40.1001	-65.918	-40.1001
0.2135	-34.79	-40.1001	-9.15527	-40.1001	-14.6484	-40.1001	-30.5176	-40.1001	-9.15527	-40.0696	-28.6865	-40.1306	-50.0488	-40.1001	-107.422	-40.1306	-48.2178	-40.0696	-43.9453	-40.1306	-35.4004	-40.1001	-45.7764	-40.1001	-40.8936	-40.1001	-54.3213	-40.1001	-27.4658	-40.1001	-45.7764	-40.1001	-47.6074	-40.1306	-51.8799	-40.1001	-64.6973	-40.1001
0.214	-42.1143	-40.1001	-14.6484	-40.1001	-29.2969	-40.1001	-29.9072	-40.0696	-15.2588	-40.1001	-35.4004	-40.0696	-39.0625	-40.1306	-92.7734	-40.0696	-59.2041	-40.1001	-49.4385	-40.1306	-33.5693	-40.0696	-31.1279	-40.1001	-28.6865	-40.1306	-37.8418	-40.1001	-40.2832	-40.0696	-51.2695	-40.1001	-37.2314	-40.1001	-40.8936	-40.1001	-58.5938	-40.1001
0.2145	-27.4658	-40.1306	-34.1797	-40.1001	-18.9209	-40.0696	-18.9209	-40.1001	-22.583	-40.1001	-26.8555	-40.1001	-48.8281	-40.1001	-104.37	-40.0696	-61.0352	-40.1001	-58.5938	-40.0696	-37.8418	-40.1001	-40.2832	-40.1001	-39.6729	-40.1001	-34.1797	-40.1306	-40.2832	-40.0696	-45.7764	-40.1001	-28.6865	-40.1001	-54.3213	-40.1001	-67.749	-40.1001
0.215	-25.0244	-40.1001	-15.2588	-40.1001	-26.8555	-40.1306	-18.9209	-40.1001	-25.6348	-40.1001	-26.2451	-40.1001	-42.7246	-40.1001	-108.032	-40.1001	-59.8145	-40.1001	-76.2939	-40.1001	-39.6729	-40.1001	-29.2969	-40.1306	-35.4004	-40.0696	-31.7383	-40.1001	-31.7383	-40.0696	-53.1006	-40.1001	-47.6074	-40.1001	-45.166	-40.1306	-67.1387	-40.1001
0.2155	-28.0762	-40.1306	-13.4277	-40.1001	-28.0762	-40.1306	-15.8691	-40.1001	-13.4277	-40.1001	-24.4141	-40.0696	-46.9971	-40.0696	-94.6045	-40.1001	-51.8799	-40.1001	-60.4248	-40.1001	-34.79	-40.0696	-41.5039	-40.1001	-25.0244	-40.1001	-34.79	-40.0696	-34.1797	-40.0696	-49.4385	-40.1001	-32.959	-40.0696	-45.7764	-40.1001	-62.2559	-40.1611
0.216	-26.8555	-40.1001	-22.583	-40.1001	-17.7002	-40.1001	-25.6348	-40.1001	-25.0244	-40.1001	-34.79	-40.1001	-43.9453	-40.1001	-88.501	-40.1001	-61.6455	-40.1001	-41.5039	-40.0696	-25.6348	-40.1001	-36.0107	-40.1001	-34.1797	-40.0696	-28.6865	-40.1001	-36.0107	-40.0696	-46.9971	-40.1001	-48.8281	-40.0696	-45.7764	-40.1001	-62.8662	-40.1001
0.2165	-21.9727	-40.1306	-19.5313	-40.1001	-18.9209	-40.1001	-23.1934	-40.0696	-20.752	-40.0696	-20.752	-40.1001	-36.0107	-40.0696	-93.9941	-40.0696	-86.6699	-40.0696	-61.6455	-40.1001	-49.4385	-40.1001	-36.6211	-40.0696	-34.79	-40.1001	-36.0107	-40.1001	-42.7246	-40.1306	-59.8145	-40.0696	-43.335	-40.0696	-34.79	-40.1001	-54.3213	-40.1306
0.217	-21.9727	-40.1001	-10.376	-40.1001	-18.3105	-40.1001	-24.4141	-40.0696	-20.752	-40.1306	-17.0898	-40.1001	-40.2832	-40.1001	-110.474	-40.1001	-65.918	-40.1001	-64.0869	-40.1001	-43.335	-40.0696	-40.2832	-40.1001	-34.79	-40.0696	-45.7764	-40.1001	-36.6211	-40.1001	-51.2695	-40.1306	-40.2832	-40.1001	-53.7109	-40.1001	-61.6455	-40.1001
0.2175	-38.4521	-40.1306	-31.7383	-40.1001	-14.0381	-40.1001	-18.3105	-40.1001	-23.8037	-40.1001	-26.2451	-40.1001	-45.166	-40.1001	-82.3975	-40.0696	-87.8906	-40.1001	-57.373	-40.0696	-47.6074	-40.1306	-40.8936	-40.1001	-36.6211	-40.1306	-33.5693	-40.1306	-27.4658	-40.0696	-59.8145	-40.1001	-28.6865	-40.0696	-55.542	-40.0696	-45.166	-40.0696
0.218	-15.8691	-40.1306	-25.6348	-40.1001	-21.9727	-40.1001	-20.1416	-40.1001	-39.6729	-40.1001	-36.6211	-40.1001	-45.7764	-40.1001	-90.9424	-40.0696	-83.6182	-40.1001	-56.1523	-40.1001	-37.2314	-40.1001	-50.0488	-40.0696	-29.9072	-40.0696	-38.4521	-40.1001	-32.3486	-40.0696	-75.0732	-40.1001	-55.542	-40.1306	-29.9072	-40.1001	-51.2695	-40.1001
0.2185	-17.7002	-40.1001	-21.9727	-40.0696	-18.3105	-40.1001	-16.4795	-40.1306	-25.6348	-40.1001	-28.0762	-40.0696	-42.7246	-40.1001	-81.7871	-40.1001	-64.0869	-40.1001	-51.8799	-40.1001	-59.2041	-40.1001	-39.0625	-40.1001	-25.0244	-40.1001	-37.8418	-40.1001	-35.4004	-40.0696	-68.9697	-40.1001	-60.4248	-40.1306	-57.373	-40.1001	-56.7627	-40.1306
0.219	-14.0381	-40.1001	-5.49316	-40.1001	-10.376	-40.0696	-10.9863	-40.1001	-29.9072	-40.0696	-23.8037	-40.0696	-53.7109	-40.0696	-90.332	-40.1001	-61.0352	-40.1001	-67.1387	-40.0696	-50.6592	-40.1306	-36.0107	-40.1001	-31.7383	-40.1001	-40.2832	-40.1001	-29.9072	-40.1001	-49.4385	-40.1001	-39.0625	-40.1001	-53.1006	-40.1001	-64.0869	-40.0696
0.2195	-14.6484	-40.1001	-15.8691	-40.1001	-14.6484	-40.1001	-15.2588	-40.0696	-25.0244	-40.0696	-24.4141	-40.1001	-48.8281	-40.1306	-91.5527	-40.1306	-81.7871	-40.1001	-56.1523	-40.1306	-42.1143	-40.1001	-53.1006	-40.1001	-40.2832	-40.1306	-39.0625	-40.0696	-36.6211	-40.1001	-41.5039	-40.1306	-45.7764	-40.1001	-37.2314	-40.0696	-46.9971	-40.1306
0.22	-13.4277	-40.1306	-21.9727	-40.1306	-34.79	-40.1306	-26.2451	-40.1001	-24.4141	-40.0696	-17.7002	-40.1001	-49.4385	-40.1001	-101.318	-40.1001	-68.9697	-40.1001	-53.1006	-40.1001	-27.4658	-40.1001	-42.7246	-40.1306	-27.4658	-40.1001	-45.166	-40.1001	-29.2969	-40.1001	-68.9697	-40.1001	-52.4902	-40.0696	-44.5557	-40.1001	-57.9834	-40.1001
0.2205	-4.27246	-40.1001	-20.752	-40.1001	-13.4277	-40.0696	-21.3623	-40.1001	-22.583	-40.1306	-27.4658	-40.1001	-59.8145	-40.1001	-104.37	-40.1306	-65.918	-40.1001	-48.8281	-40.1001	-36.6211	-40.1001	-44.5557	-40.1001	-43.9453	-40.1306	-45.166	-40.1306	-29.9072	-40.0696	-55.542	-40.1001	-54.3213	-40.0696	-46.3867	-40.1001	-50.6592	-40.1001
0.221	-15.2588	-40.1306	-30.5176	-40.1001	-18.3105	-40.1001	-15.8691	-40.0696	-19.5313	-40.1306	-26.8555	-40.0696	-59.8145	-40.1001	-112.305	-40.0696	-57.373	-40.1001	-46.9971	-40.1001	-45.166	-40.0696	-48.2178	-40.1306	-28.6865	-40.1001	-51.8799	-40.1306	-31.7383	-40.1001	-54.3213	-40.1001	-40.8936	-40.1001	-33.5693	-40.1001	-58.5938	-40.1001
0.2215	-9.76563	-40.1001	-13.4277	-40.1001	-21.9727	-40.0696	-26.2451	-40.1001	-13.4277	-40.0696	-28.0762	-40.1001	-56.7627	-40.1001	-108.643	-40.0696	-49.4385	-40.0696	-76.9043	-40.0696	-32.3486	-40.1001	-39.0625	-40.1001	-30.5176	-40.1001	-37.8418	-40.0696	-43.335	-40.1001	-64.6973	-40.0696	-45.7764	-40.0696	-34.79	-40.1001	-58.5938	-40.1001
0.222	-12.8174	-40.1001	-25.6348	-40.1001	-11.5967	-40.1001	-23.8037	-40.1001	-26.2451	-40.1001	-40.2832	-40.1306	-50.6592	-40.1001	-101.929	-40.0696	-46.9971	-40.1001	-64.6973	-40.1001	-26.8555	-40.1001	-36.6211	-40.1001	-31.1279	-40.1001	-46.9971	-40.1001	-39.0625	-40.1001	-39.0625	-40.1001	-46.9971	-40.1001	-37.8418	-40.1001	-48.2178	-40.1001
0.2225	-22.583	-40.1001	-15.8691	-40.0696	-9.15527	-40.1001	-12.207	-40.0696	-29.9072	-40.0696	-25.6348	-40.0696	-50.6592	-40.0696	-83.6182	-40.1001	-45.166	-40.1001	-90.9424	-40.0696	-30.5176	-40.1001	-37.2314	-40.1306	-38.4521	-40.1001	-48.2178	-40.1001	-34.79	-40.1001	-43.9453	-40.0696	-47.6074	-40.1001	-35.4004	-40.1001	-51.2695	-40.1001
0.223	-18.9209	-40.1001	-26.2451	-40.0696	-17.0898	-40.1001	-12.8174	-40.1001	-32.959	-40.1001	-42.1143	-40.1306	-36.6211	-40.1001	-103.149	-40.1306	-43.335	-40.1306	-69.5801	-40.0696	-31.7383	-40.1306	-46.3867	-40.1001	-29.9072	-40.0696	-45.7764	-40.1001	-44.5557	-40.0696	-61.6455	-40.1001	-48.2178	-40.1306	-40.8936	-40.1306	-57.9834	-40.1001
0.2235	-15.8691	-40.0696	-23.1934	-40.1306	-23.8037	-40.1306	-5.49316	-40.1306	-23.1934	-40.1001	-21.9727	-40.1001	-53.1006	-40.0696	-110.474	-40.1001	-48.2178	-40.1001	-90.9424	-40.1001	-40.2832	-40.1001	-42.7246	-40.1001	-31.7383	-40.0696	-37.2314	-40.1001	-33.5693	-40.0696	-46.9971	-40.1001	-45.7764	-40.1306	-34.1797	-40.0391	-62.8662	-40.1001
0.224	-12.8174	-40.1001	-15.8691	-40.1001	-10.376	-40.1001	-12.8174	-40.1001	-19.5313	-40.1001	-23.1934	-40.0696	-45.166	-40.1001	-93.3838	-40.1001	-39.0625	-40.1001	-64.0869	-40.1001	-40.2832	-40.1001	-62.2559	-40.1001	-20.752	-40.0696	-42.7246	-40.1001	-44.5557	-40.1001	-39.6729	-40.0696	-54.3213	-40.1001	-32.959	-40.1001	-42.1143	-40.0696
0.2245	-9.15527	-40.1306	-23.1934	-40.1001	-22.583	-40.1001	-26.2451	-40.1001	-26.2451	-40.1001	-21.9727	-40.1001	-50.6592	-40.1001	-101.929	-40.1306	-36.6211	-40.1001	-84.2285	-40.1001	-38.4521	-40.0696	-58.5938	-40.1001	-18.9209	-40.0696	-40.2832	-40.1306	-39.0625	-40.1001	-70.8008	-40.1001	-41.5039	-40.0696	-35.4004	-40.0696	-53.7109	-40.0696
0.225	-4.88281	-40.1001	-15.8691	-40.1001	-15.8691	-40.0696	-26.2451	-40.1001	-21.9727	-40.1001	-29.9072	-40.0696	-43.9453	-40.1001	-109.863	-40.1001	-37.2314	-40.0696	-70.8008	-40.1001	-37.8418	-40.1001	-29.2969	-40.1306	-44.5557	-40.1306	-36.6211	-40.0696	-45.166	-40.1001	-54.9316	-40.1001	-53.7109	-40.1001	-42.7246	-40.0696	-42.1143	-40.0696
0.2255	-6.71387	-40.1001	-4.27246	-40.1306	-14.6484	-40.0696	-18.3105	-40.1001	-18.3105	-40.1001	-25.0244	-40.1001	-36.6211	-40.0696	-98.2666	-40.1001	-38.4521	-40.1001	-76.2939	-40.0696	-38.4521	-40.1001	-40.8936	-40.1001	-32.3486	-40.1306	-51.2695	-40.0696	-39.0625	-40.0696	-67.1387	-40.1001	-44.5557	-40.0696	-42.1143	-40.1001	-43.9453	-40.0696
0.226	-18.3105	-40.0696	-23.8037	-40.1306	-20.1416	-40.1306	-20.752	-40.1001	-26.8555	-40.1001	-42.1143	-40.1001	-42.7246	-40.1001	-103.149	-40.1306	-29.9072	-40.0696	-75.0732	-40.1001	-38.4521	-40.1306	-40.8936	-40.1306	-34.79	-40.1001	-36.0107	-40.1001	-39.0625	-40.1001	-57.373	-40.1306	-40.8936	-40.0696	-34.79	-40.1001	-55.542	-40.1001
0.2265	-4.27246	-40.0696	-20.1416	-40.1001	-25.0244	-40.1001	-23.8037	-40.1001	-24.4141	-40.1001	-15.2588	-40.0696	-38.4521	-40.1001	-97.0459	-40.1001	-37.2314	-40.1001	-81.1768	-40.1306	-38.4521	-40.1001	-45.7764	-40.1001	-31.1279	-40.0696	-29.9072	-40.1001	-34.1797	-40.1001	-57.9834	-40.1001	-32.3486	-40.1001	-36.0107	-40.1306	-50.6592	-40.1001
0.227	-7.93457	-40.1306	-10.9863	-40.1001	-24.4141	-40.1001	-18.9209	-40.1001	-23.8037	-40.1001	-36.0107	-40.1306	-51.8799	-40.1306	-93.9941	-40.1001	-46.3867	-40.1306	-64.6973	-40.1001	-30.5176	-40.1001	-66.5283	-40.1001	-31.1279	-40.1001	-34.79	-40.1306	-44.5557	-40.1001	-53.7109	-40.0696	-32.959	-40.1001	-34.79	-40.1001	-48.8281	-40.1306
0.2275	-18.3105	-40.1001	-3.66211	-40.1001	-26.8555	-40.1001	-24.4141	-40.1001	-26.2451	-40.0696	-31.1279	-40.1306	-54.3213	-40.0696	-98.877	-40.1001	-38.4521	-40.1001	-73.2422	-40.1001	-42.1143	-40.1306	-50.0488	-40.1001	-29.2969	-40.1001	-32.3486	-40.0696	-25.6348	-40.1001	-61.0352	-40.1001	-42.7246	-40.1001	-41.5039	-40.1001	-46.3867	-40.1001
0.228	-11.5967	-40.1001	-14.6484	-40.1001	-23.1934	-40.1001	-12.207	-40.1001	-5.49316	-40.0696	-42.7246	-40.1306	-56.7627	-40.0696	-76.2939	-40.1001	-47.6074	-40.1001	-73.8525	-40.1306	-34.79	-40.1001	-36.0107	-40.1001	-26.2451	-40.1001	-48.2178	-40.1001	-34.79	-40.1001	-45.166	-40.0696	-44.5557	-40.1001	-46.9971	-40.1001	-68.3594	-40.1306
0.2285	-18.3105	-40.1001	-14.6484	-40.1001	-31.1279	-40.1001	-14.0381	-40.1001	-23.1934	-40.1001	-36.6211	-40.1001	-39.0625	-40.0696	-86.6699	-40.1306	-73.2422	-40.0696	-61.0352	-40.1001	-45.7764	-40.1001	-36.0107	-40.0696	-31.1279	-40.1001	-31.7383	-40.1001	-42.1143	-40.1306	-57.9834	-40.1001	-30.5176	-40.0696	-36.6211	-40.1001	-60.4248	-40.1001
0.229	-21.3623	-40.1001	-19.5313	-40.1306	-12.207	-40.1001	-7.93457	-40.1001	-32.959	-40.1001	-27.4658	-40.1001	-33.5693	-40.0696	-116.577	-40.1306	-76.9043	-40.0696	-78.125	-40.1001	-32.3486	-40.1001	-37.2314	-40.1001	-32.959	-40.1001	-46.3867	-40.1306	-42.1143	-40.1001	-51.8799	-40.1001	-32.3486	-40.0696	-38.4521	-40.1001	-54.3213	-40.1001
0.2295	-8.54492	-40.1306	-15.2588	-40.1001	-23.8037	-40.1001	-29.2969	-40.1001	-35.4004	-40.1001	-34.79	-40.1001	-32.959	-40.1306	-117.188	-40.1001	-94.6045	-40.0696	-83.6182	-40.1001	-43.9453	-40.1306	-34.79	-40.1001	-37.2314	-40.1001	-37.2314	-40.1001	-34.79	-40.1001	-37.8418	-40.1001	-50.0488	-40.1001	-54.3213	-40.0696	-62.8662	-40.1306
0.23	-5.49316	-40.1001	-9.76563	-40.1001	-21.3623	-40.1001	-12.207	-40.1001	-21.3623	-40.1001	-26.8555	-40.0696	-34.79	-40.1306	-114.136	-40.1001	-86.6699	-40.1001	-73.8525	-40.1001	-43.335	-40.1306	-36.6211	-40.1001	-43.335	-40.1306	-46.3867	-40.1001	-37.2314	-40.1001	-46.3867	-40.1001	-28.6865	-40.1001	-49.4385	-40.0696	-41.5039	-40.1001
0.2305	-26.8555	-40.1001	-11.5967	-40.1001	-15.8691	-40.1306	-7.32422	-40.1001	-16.4795	-40.1001	-37.8418	-40.0696	-45.166	-40.1001	-67.1387	-40.1306	-75.6836	-40.1306	-47.6074	-40.0696	-28.0762	-40.1001	-46.9971	-40.0696	-48.8281	-40.1306	-40.8936	-40.1001	-50.0488	-40.1001	-42.1143	-40.0696	-55.542	-40.1001	-45.7764	-40.1306	-68.9697	-40.1001
0.231	-21.9727	-40.0696	-11.5967	-40.1001	-25.0244	-40.1001	-23.8037	-40.1001	-25.0244	-40.0696	-29.9072	-40.1001	-34.79	-40.1001	-65.3076	-40.1001	-73.8525	-40.1001	-59.2041	-40.0696	-37.8418	-40.1001	-40.8936	-40.1001	-50.6592	-40.0696	-35.4004	-40.0696	-36.0107	-40.1001	-52.4902	-40.1001	-41.5039	-40.1001	-37.2314	-40.1306	-54.3213	-40.1001
0.2315	-10.9863	-40.1001	-15.8691	-40.1001	-19.5313	-40.0696	-21.9727	-40.1001	-27.4658	-40.1001	-43.335	-40.1001	-54.3213	-40.1306	-68.3594	-40.1001	-73.8525	-40.1001	-74.4629	-40.1001	-31.1279	-40.0696	-40.2832	-40.1001	-30.5176	-40.1001	-40.2832	-40.1001	-36.6211	-40.1306	-42.1143	-40.1001	-25.6348	-40.1306	-34.79	-40.0696	-42.7246	-40.1001
0.232	-32.959	-40.1001	-14.6484	-40.1001	-10.9863	-40.1001	-23.1934	-40.0696	-20.1416	-40.1001	-40.2832	-40.1001	-38.4521	-40.0696	-73.8525	-40.0696	-62.8662	-40.1001	-68.9697	-40.1001	-34.1797	-40.1001	-42.1143	-40.1001	-30.5176	-40.1001	-39.6729	-40.0696	-29.9072	-40.1306	-75.0732	-40.1001	-36.6211	-40.1001	-39.6729	-40.1001	-70.8008	-40.0696
0.2325	-14.6484	-40.1001	-13.4277	-40.1001	-25.6348	-40.1001	-28.0762	-40.0696	-12.207	-40.0696	-45.166	-40.1001	-40.8936	-40.1306	-81.1768	-40.1001	-72.0215	-40.1001	-78.125	-40.0696	-42.7246	-40.1001	-43.9453	-40.1001	-28.6865	-40.0696	-24.4141	-40.1001	-42.1143	-40.1306	-67.749	-40.1306	-48.8281	-40.1001	-43.335	-40.0696	-53.7109	-40.0696
0.233	-21.3623	-40.1001	-1.83105	-40.1001	-25.0244	-40.1001	-22.583	-40.1001	-26.2451	-40.0696	-32.959	-40.1001	-43.335	-40.1001	-88.501	-40.1001	-88.501	-40.1001	-73.8525	-40.1001	-36.0107	-40.1001	-38.4521	-40.1001	-38.4521	-40.1001	-32.3486	-40.1001	-36.0107	-40.1001	-60.4248	-40.1001	-35.4004	-40.0696	-50.0488	-40.0696	-70.1904	-40.0696
0.2335	-10.9863	-40.1001	-4.27246	-40.0696	-16.4795	-40.1306	-17.7002	-40.1001	-21.9727	-40.0696	-39.0625	-40.0696	-52.4902	-40.1001	-101.318	-40.0696	-80.5664	-40.0696	-65.918	-40.0696	-34.79	-40.1001	-36.6211	-40.1001	-39.0625	-40.1306	-53.7109	-40.1001	-39.0625	-40.0696	-54.9316	-40.1306	-39.0625	-40.1001	-58.5938	-40.1001	-65.918	-40.1001
0.234	-14.6484	-40.1001	-12.8174	-40.1001	-21.9727	-40.1001	-24.4141	-40.1306	-14.6484	-40.0696	-37.2314	-40.0696	-42.7246	-40.1001	-95.2148	-40.1001	-64.6973	-40.0696	-65.3076	-40.1001	-39.0625	-40.1001	-49.4385	-40.0696	-43.9453	-40.1001	-35.4004	-40.1001	-40.8936	-40.1001	-54.9316	-40.1001	-43.9453	-40.0696	-37.2314	-40.1306	-46.3867	-40.1001
0.2345	-26.2451	-40.1001	-20.1416	-40.1001	-21.3623	-40.1001	-13.4277	-40.1001	-21.3623	-40.1001	-32.3486	-40.1001	-39.6729	-40.1001	-96.4355	-40.1001	-60.4248	-40.1001	-70.1904	-40.1001	-59.8145	-40.1001	-40.2832	-40.1306	-54.9316	-40.1001	-39.6729	-40.0696	-48.8281	-40.1001	-48.2178	-40.1001	-35.4004	-40.1001	-38.4521	-40.1306	-34.1797	-40.1306
0.235	-26.2451	-40.1306	-3.66211	-40.1306	-6.10352	-40.1001	-19.5313	-40.0696	-15.2588	-40.1001	-31.7383	-40.1001	-52.4902	-40.0696	-98.2666	-40.0696	-52.4902	-40.1306	-65.918	-40.1306	-45.166	-40.1001	-32.959	-40.0696	-50.6592	-40.1001	-48.8281	-40.1306	-32.959	-40.1001	-47.6074	-40.1001	-35.4004	-40.1001	-49.4385	-40.1001	-59.8145	-40.1001
0.2355	-18.3105	-40.1001	-16.4795	-40.1001	-25.6348	-40.1001	-6.10352	-40.1001	-15.8691	-40.0696	-45.7764	-40.1001	-57.9834	-40.1001	-107.422	-40.1001	-60.4248	-40.1306	-79.3457	-40.1001	-40.2832	-40.1306	-57.9834	-40.1001	-34.79	-40.1001	-45.7764	-40.1001	-34.1797	-40.1001	-65.3076	-40.1001	-37.8418	-40.1306	-36.6211	-40.1306	-57.9834	-40.1001
0.236	-22.583	-40.1001	-11.5967	-40.1306	-23.1934	-40.1001	-10.376	-40.1306	-25.0244	-40.1001	-29.2969	-40.1001	-40.2832	-40.1001	-107.422	-40.1306	-60.4248	-40.1001	-76.9043	-40.1001	-51.2695	-40.1306	-29.9072	-40.1001	-27.4658	-40.0696	-51.2695	-40.1001	-27.4658	-40.1001	-46.9971	-40.1001	-42.1143	-40.1001	-41.5039	-40.0696	-55.542	-40.1001
0.2365	-10.9863	-40.1001	-30.5176	-40.0696	-9.76563	-40.1001	-18.3105	-40.1001	-25.0244	-40.1001	-10.9863	-40.0696	-51.2695	-40.1001	-93.9941	-40.1306	-73.8525	-40.1306	-66.5283	-40.0696	-55.542	-40.1306	-40.8936	-40.0696	-43.335	-40.1306	-46.9971	-40.1001	-36.0107	-40.1001	-58.5938	-40.0696	-42.7246	-40.0696	-38.4521	-40.0696	-58.5938	-40.0696
0.237	-17.0898	-40.1001	-14.0381	-40.1001	-26.2451	-40.1001	-21.3623	-40.1001	-9.76563	-40.1001	-28.0762	-40.1001	-53.1006	-40.1001	-101.929	-40.1001	-54.9316	-40.1001	-59.8145	-40.0696	-48.8281	-40.0696	-54.9316	-40.1001	-38.4521	-40.0696	-46.3867	-40.1001	-45.7764	-40.1306	-70.1904	-40.1001	-31.7383	-40.0696	-40.2832	-40.1001	-56.1523	-40.0696
0.2375	-12.8174	-40.1306	-16.4795	-40.1001	-31.1279	-40.1001	-3.05176	-40.1001	-17.7002	-40.1001	-26.2451	-40.0696	-53.7109	-40.1001	-116.577	-40.1306	-95.8252	-40.1001	-55.542	-40.1001	-46.3867	-40.1001	-33.5693	-40.1001	-39.6729	-40.1001	-41.5039	-40.1001	-40.2832	-40.1001	-50.6592	-40.1001	-33.5693	-40.1001	-42.1143	-40.1001	-55.542	-40.0696
0.238	-16.4795	-40.1306	-26.2451	-40.1001	-20.1416	-40.1001	-17.0898	-40.1306	-18.9209	-40.1306	-36.6211	-40.1001	-51.8799	-40.1001	-104.37	-40.1001	-66.5283	-40.1306	-45.166	-40.1001	-46.9971	-40.1001	-41.5039	-40.0696	-31.1279	-40.1306	-42.1143	-40.1001	-47.6074	-40.1001	-52.4902	-40.0696	-44.5557	-40.1001	-41.5039	-40.1306	-67.749	-40.0696
0.2385	-18.3105	-40.1001	-22.583	-40.1001	-23.1934	-40.1001	-34.79	-40.1001	-25.6348	-40.0696	-34.1797	-40.1001	-42.7246	-40.1001	-102.539	-40.1001	-76.2939	-40.1306	-39.0625	-40.0696	-54.9316	-40.1001	-48.2178	-40.1306	-28.0762	-40.1001	-43.335	-40.1001	-26.8555	-40.1306	-53.7109	-40.1001	-49.4385	-40.1001	-37.8418	-40.1001	-57.9834	-40.1001
0.239	-3.66211	-40.0696	-7.32422	-40.1306	-14.6484	-40.0696	-10.376	-40.1306	-15.8691	-40.0696	-29.9072	-40.1001	-46.3867	-40.1001	-91.5527	-40.1306	-51.2695	-40.0696	-60.4248	-40.0696	-37.8418	-40.1001	-40.8936	-40.1306	-26.2451	-40.1001	-43.9453	-40.0696	-36.6211	-40.1001	-48.8281	-40.1001	-42.1143	-40.1001	-28.0762	-40.0696	-70.8008	-40.1306
0.2395	-13.4277	-40.1001	-21.9727	-40.1001	-20.752	-40.1306	-17.0898	-40.1001	-13.4277	-40.1001	-32.3486	-40.1001	-51.2695	-40.1001	-106.812	-40.1001	-78.7354	-40.1001	-89.1113	-40.1001	-28.0762	-40.1001	-44.5557	-40.1306	-28.0762	-40.1001	-40.8936	-40.1001	-36.6211	-40.1001	-38.4521	-40.1001	-45.7764	-40.1001	-55.542	-40.1001	-76.2939	-40.1001
0.24	-6.10352	-40.1001	-18.9209	-40.1001	-26.2451	-40.1001	-24.4141	-40.1001	-25.0244	-40.1001	-28.6865	-40.1001	-48.2178	-40.1001	-91.5527	-40.1001	-100.708	-40.1001	-54.9316	-40.1001	-46.3867	-40.1001	-37.2314	-40.1001	-26.8555	-40.1306	-49.4385	-40.0696	-41.5039	-40.0696	-44.5557	-40.1001	-42.7246	-40.1001	-32.3486	-40.1001	-62.2559	-40.1001
0.2405	-6.10352	-40.1001	-20.752	-40.0696	-20.1416	-40.1001	-17.7002	-40.1001	-21.9727	-40.1001	-32.3486	-40.1001	-40.2832	-40.0696	-111.694	-40.1306	-109.253	-40.1001	-84.8389	-40.1001	-33.5693	-40.1001	-46.3867	-40.1001	-32.959	-40.1001	-36.6211	-40.1001	-37.2314	-40.1001	-46.3867	-40.1001	-41.5039	-40.1306	-37.2314	-40.1001	-64.0869	-40.1001
0.241	-4.88281	-40.1001	-24.4141	-40.0696	-18.3105	-40.1001	-28.6865	-40.1001	-23.8037	-40.0696	-39.6729	-40.1001	-47.6074	-40.1001	-106.201	-40.1306	-97.6563	-40.1001	-94.6045	-40.1001	-39.0625	-40.0696	-40.8936	-40.1001	-33.5693	-40.1001	-42.7246	-40.1306	-43.335	-40.1001	-42.7246	-40.0696	-41.5039	-40.1001	-44.5557	-40.1001	-63.4766	-40.1001
0.2415	-18.9209	-40.1001	-26.2451	-40.1001	-31.1279	-40.1306	-18.3105	-40.1001	-20.752	-40.1001	-35.4004	-40.0696	-32.959	-40.1001	-88.501	-40.1001	-112.305	-40.1001	-79.9561	-40.1001	-36.0107	-40.1306	-40.8936	-40.0696	-21.9727	-40.1001	-43.9453	-40.1306	-38.4521	-40.0696	-29.9072	-40.1001	-33.5693	-40.1001	-52.4902	-40.1001	-60.4248	-40.0696
0.242	-26.8555	-40.1001	-29.2969	-40.0696	-21.9727	-40.1001	-14.6484	-40.1001	-13.4277	-40.1001	-29.9072	-40.0696	-36.0107	-40.1001	-108.032	-40.1001	-109.863	-40.1001	-97.6563	-40.1306	-28.6865	-40.0696	-44.5557	-40.0696	-28.0762	-40.0696	-46.3867	-40.0696	-32.3486	-40.1001	-46.9971	-40.1001	-38.4521	-40.1001	-46.9971	-40.1001	-64.6973	-40.0696
0.2425	-7.32422	-40.1306	-21.9727	-40.0696	-17.0898	-40.1001	-19.5313	-40.1306	-20.1416	-40.1001	-19.5313	-40.0696	-39.0625	-40.0696	-85.4492	-40.1001	-111.084	-40.1001	-75.6836	-40.1001	-37.2314	-40.1001	-48.8281	-40.1001	-32.959	-40.1001	-39.6729	-40.1306	-26.2451	-40.0696	-43.9453	-40.0696	-50.6592	-40.1001	-50.0488	-40.1306	-69.5801	-40.1001
0.243	-3.66211	-40.1001	-21.3623	-40.1306	-28.0762	-40.1001	-18.9209	-40.1001	-21.3623	-40.1001	-39.0625	-40.1001	-45.166	-40.0696	-75.6836	-40.1306	-96.4355	-40.1001	-92.1631	-40.1001	-34.79	-40.0696	-51.8799	-40.1306	-37.2314	-40.1306	-47.6074	-40.0696	-32.959	-40.1001	-44.5557	-40.1001	-47.6074	-40.1001	-48.8281	-40.1001	-60.4248	-40.1306
0.2435	-9.15527	-40.1001	-19.5313	-40.1001	-25.6348	-40.1001	-18.9209	-40.1001	-26.2451	-40.1001	-35.4004	-40.1001	-37.8418	-40.1001	-97.0459	-40.0696	-106.812	-40.1001	-92.1631	-40.1001	-37.2314	-40.1001	-62.2559	-40.1001	-21.9727	-40.1001	-40.8936	-40.0696	-39.0625	-40.1001	-52.4902	-40.1001	-40.2832	-40.1001	-28.0762	-40.1001	-59.8145	-40.1306
0.244	2.44141	-40.1001	-21.9727	-40.0696	-12.8174	-40.1001	-21.3623	-40.1306	-26.8555	-40.1001	-29.2969	-40.0696	-51.2695	-40.1001	-72.6318	-40.1001	-139.771	-40.1001	-90.9424	-40.1001	-38.4521	-40.0696	-56.7627	-40.1001	-16.4795	-40.0696	-48.8281	-40.1001	-42.1143	-40.0696	-53.7109	-40.1306	-37.2314	-40.1001	-42.7246	-40.0696	-56.7627	-40.1306
0.2445	-12.8174	-40.0696	-17.7002	-40.1306	-13.4277	-40.1306	-16.4795	-40.1001	-18.9209	-40.1001	-27.4658	-40.1001	-33.5693	-40.0696	-97.0459	-40.1001	-108.643	-40.1001	-96.4355	-40.1001	-46.3867	-40.1001	-45.7764	-40.0696	-23.1934	-40.1306	-42.7246	-40.1001	-46.3867	-40.1001	-40.8936	-40.1306	-39.6729	-40.0696	-37.8418	-40.0696	-59.8145	-40.1001
0.245	-7.93457	-40.1001	-14.6484	-40.1001	-17.0898	-40.1001	-14.6484	-40.1001	-18.9209	-40.1001	-21.9727	-40.1001	-38.4521	-40.1001	-98.2666	-40.1001	-121.46	-40.1001	-89.1113	-40.1001	-34.79	-40.1001	-48.2178	-40.0696	-40.2832	-40.1001	-36.6211	-40.0696	-32.959	-40.1001	-42.1143	-40.1306	-45.166	-40.1001	-32.3486	-40.1306	-62.8662	-40.1001
0.2455	-2.44141	-40.1306	-7.93457	-40.0696	-23.8037	-40.1001	-20.752	-40.1001	-20.752	-40.1001	-38.4521	-40.1001	-31.7383	-40.1001	-76.2939	-40.1001	-96.4355	-40.1001	-65.3076	-40.1001	-29.2969	-40.1001	-49.4385	-40.1001	-39.6729	-40.1001	-23.8037	-40.1306	-52.4902	-40.0696	-53.7109	-40.1001	-39.0625	-40.1001	-64.0869	-40.1001	-54.9316	-40.0696
0.246	-17.0898	-40.1306	-9.15527	-40.1001	-23.1934	-40.1001	-26.8555	-40.1306	-16.4795	-40.1306	-30.5176	-40.1001	-48.2178	-40.1001	-81.7871	-40.1001	-112.915	-40.0696	-85.4492	-40.0696	-31.1279	-40.1001	-42.1143	-40.0696	-43.335	-40.1306	-38.4521	-40.1306	-42.7246	-40.1001	-50.6592	-40.1001	-46.9971	-40.0696	-41.5039	-40.0696	-57.9834	-40.0696
0.2465	-4.88281	-40.0696	-14.6484	-40.1001	-18.3105	-40.1306	-6.10352	-40.0696	-26.8555	-40.1001	-25.0244	-40.1001	-46.3867	-40.1001	-81.7871	-40.0696	-108.032	-40.1001	-90.332	-40.1001	-39.0625	-40.1001	-45.7764	-40.1001	-30.5176	-40.1001	-36.6211	-40.1001	-32.959	-40.1306	-41.5039	-40.1001	-45.166	-40.1306	-48.8281	-40.1306	-46.3867	-40.0696
0.247	-7.93457	-40.1001	-13.4277	-40.1306	-36.6211	-40.1001	-18.3105	-40.0696	-29.2969	-40.0696	-18.3105	-40.1001	-37.2314	-40.0696	-63.4766	-40.1001	-95.2148	-40.1001	-78.7354	-40.1306	-36.0107	-40.1001	-39.0625	-40.1306	-37.8418	-40.0696	-34.1797	-40.1001	-37.2314	-40.1001	-42.7246	-40.1001	-42.7246	-40.1001	-47.6074	-40.1001	-39.0625	-40.1001
0.2475	-26.8555	-40.1001	-14.6484	-40.1306	-19.5313	-40.1001	-23.8037	-40.1306	-23.8037	-40.1001	-30.5176	-40.0696	-35.4004	-40.1001	-78.7354	-40.1306	-112.305	-40.1001	-86.0596	-40.1001	-38.4521	-40.1001	-33.5693	-40.1001	-36.0107	-40.1306	-39.0625	-40.1001	-23.1934	-40.1001	-37.2314	-40.0696	-56.1523	-40.0696	-43.9453	-40.1306	-39.6729	-40.1306
0.248	-10.376	-40.1306	-20.1416	-40.1001	-21.9727	-40.1001	-15.8691	-40.0696	-18.9209	-40.1001	-45.166	-40.1306	-30.5176	-40.1306	-64.0869	-40.0696	-111.694	-40.1001	-108.032	-40.1001	-29.2969	-40.1001	-37.8418	-40.1306	-43.335	-40.0696	-42.1143	-40.1001	-40.8936	-40.1306	-38.4521	-40.1001	-51.2695	-40.1001	-43.335	-40.0696	-40.8936	-40.1001
0.2485	-12.8174	-40.1001	-12.8174	-40.0696	-20.752	-40.1001	-21.9727	-40.1001	-28.0762	-40.0696	-36.6211	-40.1001	-33.5693	-40.1001	-95.2148	-40.1001	-112.305	-40.1001	-83.0078	-40.1306	-36.6211	-40.1001	-39.0625	-40.1001	-36.0107	-40.1306	-33.5693	-40.1001	-45.7764	-40.1306	-45.166	-40.1306	-46.3867	-40.1306	-45.7764	-40.0696	-50.0488	-40.1001
0.249	-20.752	-40.1306	-18.9209	-40.1306	-33.5693	-40.1306	-20.1416	-40.1306	-16.4795	-40.1001	-37.2314	-40.1001	-14.6484	-40.1001	-109.863	-40.1001	-106.812	-40.0696	-86.0596	-40.1001	-36.0107	-40.0696	-39.6729	-40.1001	-42.7246	-40.1306	-33.5693	-40.1306	-50.6592	-40.0696	-44.5557	-40.1001	-48.2178	-40.0696	-37.8418	-40.1001	-46.3867	-40.0696
0.2495	-12.8174	-40.1001	-9.15527	-40.0696	-31.1279	-40.1306	-31.1279	-40.1001	-18.3105	-40.1001	-23.8037	-40.1306	-31.1279	-40.1001	-86.6699	-40.1001	-99.4873	-40.1306	-60.4248	-40.1001	-40.8936	-40.0696	-36.0107	-40.1001	-37.8418	-40.1001	-35.4004	-40.1001	-42.7246	-40.1001	-39.6729	-40.0696	-55.542	-40.0696	-51.8799	-40.0696	-51.8799	-40.1306
0.25	-18.3105	-40.1001	-8.54492	-40.1001	-21.9727	-40.1306	-23.8037	-40.1306	-13.4277	-40.1001	-30.5176	-40.1001	-48.2178	-40.1001	-54.3213	-40.0696	-100.708	-40.1001	-80.5664	-40.1001	-36.6211	-40.1001	-36.0107	-40.1001	-31.1279	-40.1001	-51.8799	-40.0696	-40.8936	-40.1001	-49.4385	-40.1306	-42.7246	-40.1001	-42.1143	-40.1001	-39.6729	-40.0696
0.2505	-6.10352	-40.1001	-15.8691	-40.1001	-24.4141	-40.1001	-20.1416	-40.1001	-17.7002	-40.1001	-31.7383	-40.0696	-36.0107	-40.1001	-57.373	-40.1001	-100.708	-40.1001	-89.7217	-40.1001	-30.5176	-40.1001	-42.7246	-40.1001	-37.2314	-40.1001	-37.2314	-40.1001	-32.3486	-40.1001	-43.9453	-40.1001	-38.4521	-40.1001	-54.3213	-40.1001	-44.5557	-40.1001
0.251	-20.1416	-40.1001	-10.9863	-40.1001	-18.9209	-40.1001	-21.9727	-40.1306	-24.4141	-40.0696	-38.4521	-40.1306	-37.2314	-40.0696	-85.4492	-40.1306	-112.915	-40.1306	-106.812	-40.1001	-36.6211	-40.1306	-45.166	-40.1001	-41.5039	-40.1306	-41.5039	-40.0696	-33.5693	-40.1001	-43.335	-40.0696	-39.0625	-40.1306	-59.8145	-40.1001	-54.3213	-40.1001
0.2515	-19.5313	-40.1001	-15.8691	-40.1306	-14.6484	-40.1001	-15.2588	-40.1001	-20.1416	-40.0696	-32.3486	-40.1001	-31.1279	-40.1001	-113.525	-40.1001	-84.2285	-40.1001	-86.6699	-40.1001	-31.7383	-40.1306	-35.4004	-40.1306	-33.5693	-40.0696	-43.335	-40.1001	-37.2314	-40.1001	-54.9316	-40.1001	-36.0107	-40.1001	-51.8799	-40.1001	-38.4521	-40.1001
0.252	-18.9209	-40.1306	-14.0381	-40.0696	-15.2588	-40.1001	-24.4141	-40.1306	-28.0762	-40.1001	-40.2832	-40.0696	-40.8936	-40.1306	-92.1631	-40.1001	-90.332	-40.1306	-81.7871	-40.1001	-27.4658	-40.1001	-36.0107	-40.1306	-42.7246	-40.1001	-37.2314	-40.1001	-39.0625	-40.0696	-53.7109	-40.1001	-48.2178	-40.1001	-60.4248	-40.1001	-44.5557	-40.0696
0.2525	-31.7383	-40.1306	-2.44141	-40.0696	-29.2969	-40.1001	-20.752	-40.1306	-16.4795	-40.0696	-39.6729	-40.1001	-32.3486	-40.0696	-108.032	-40.1306	-70.1904	-40.1001	-72.0215	-40.1001	-30.5176	-40.0391	-46.9971	-40.1001	-33.5693	-40.1001	-45.7764	-40.1001	-34.79	-40.1001	-50.0488	-40.1001	-39.6729	-40.0696	-53.1006	-40.1001	-45.7764	-40.0696
0.253	-18.9209	-40.1001	-3.05176	-40.1001	-15.8691	-40.1001	-18.9209	-40.1001	-15.2588	-40.1001	-42.7246	-40.1306	-24.4141	-40.0696	-111.694	-40.1001	-76.9043	-40.1001	-90.9424	-40.1001	-35.4004	-40.1001	-37.8418	-40.1001	-34.1797	-40.1306	-53.1006	-40.1001	-35.4004	-40.1001	-43.335	-40.1001	-51.8799	-40.1001	-53.7109	-40.1001	-54.9316	-40.1001
0.2535	-20.752	-40.1306	-10.9863	-40.0696	-21.3623	-40.1001	-23.1934	-40.1001	-21.3623	-40.1001	-25.0244	-40.1001	-29.9072	-40.1001	-122.07	-40.1001	-84.2285	-40.1001	-81.7871	-40.1001	-42.7246	-40.0696	-39.0625	-40.1001	-39.0625	-40.1001	-50.0488	-40.1001	-35.4004	-40.1001	-41.5039	-40.1001	-45.7764	-40.1001	-51.8799	-40.1001	-45.166	-40.0696
0.254	-12.207	-40.0696	-12.8174	-40.1001	-6.10352	-40.1001	-20.1416	-40.0696	-21.9727	-40.0696	-45.7764	-40.0696	-36.0107	-40.0696	-125.732	-40.1001	-61.0352	-40.0696	-86.0596	-40.1001	-29.9072	-40.1001	-51.8799	-40.1001	-36.6211	-40.0696	-39.0625	-40.1306	-38.4521	-40.1001	-50.0488	-40.1001	-38.4521	-40.1001	-51.8799	-40.1001	-44.5557	-40.1001
0.2545	-30.5176	-40.1306	-17.7002	-40.1001	-9.15527	-40.1001	-23.1934	-40.1001	-26.2451	-40.1001	-46.9971	-40.1001	-37.8418	-40.1001	-120.239	-40.1001	-67.1387	-40.0696	-81.7871	-40.1001	-34.1797	-40.1306	-50.0488	-40.0696	-45.7764	-40.1001	-38.4521	-40.1001	-37.2314	-40.0696	-42.1143	-40.1001	-51.8799	-40.0696	-46.9971	-40.1001	-62.2559	-40.1001
0.255	-18.9209	-40.0696	-6.10352	-40.1001	-26.2451	-40.1001	-29.2969	-40.1306	-16.4795	-40.1306	-20.1416	-40.1001	-46.3867	-40.1001	-97.0459	-40.1001	-72.6318	-40.1001	-89.1113	-40.1001	-27.4658	-40.1001	-29.9072	-40.1001	-48.2178	-40.0696	-44.5557	-40.1306	-40.2832	-40.0696	-55.542	-40.1306	-39.0625	-40.1306	-43.9453	-40.0696	-51.2695	-40.1001
0.2555	-15.2588	-40.0696	-14.6484	-40.1001	-24.4141	-40.1001	-31.1279	-40.1306	-10.376	-40.1001	-30.5176	-40.1306	-46.3867	-40.0696	-103.76	-40.1001	-57.373	-40.1306	-89.1113	-40.1001	-36.0107	-40.0696	-36.0107	-40.1001	-43.9453	-40.1306	-57.9834	-40.1001	-30.5176	-40.1001	-66.5283	-40.1001	-35.4004	-40.0696	-52.4902	-40.1001	-64.0869	-40.1001
0.256	-9.15527	-40.1306	-14.6484	-40.1001	-12.207	-40.1001	-22.583	-40.1306	-29.9072	-40.0696	-25.6348	-40.1001	-52.4902	-40.0696	-78.7354	-40.1001	-50.6592	-40.1306	-84.2285	-40.1001	-42.7246	-40.1001	-37.2314	-40.1001	-35.4004	-40.1306	-40.8936	-40.0696	-50.6592	-40.1001	-71.4111	-40.1001	-37.8418	-40.1001	-49.4385	-40.1001	-37.2314	-40.1001
0.2565	-6.71387	-40.1306	-20.752	-40.0696	3.05176	-40.1001	-17.0898	-40.1001	-33.5693	-40.1001	-29.9072	-40.0696	-29.9072	-40.0696	-81.7871	-40.1001	-43.9453	-40.1001	-81.7871	-40.1001	-42.1143	-40.1001	-48.8281	-40.1001	-36.6211	-40.1001	-43.9453	-40.1001	-25.6348	-40.1306	-59.8145	-40.1306	-39.0625	-40.1001	-37.2314	-40.1001	-50.6592	-40.1001
0.257	-10.376	-40.1001	-21.9727	-40.1001	-2.44141	-40.1001	-21.9727	-40.1001	-25.0244	-40.1001	-29.9072	-40.1001	-36.0107	-40.1001	-95.8252	-40.1001	-44.5557	-40.1001	-86.6699	-40.1001	-47.6074	-40.1001	-58.5938	-40.1001	-29.2969	-40.1001	-42.7246	-40.1001	-39.6729	-40.1001	-72.6318	-40.0696	-43.9453	-40.1001	-57.373	-40.0696	-42.7246	-40.1001
0.2575	-24.4141	-40.1001	-18.9209	-40.1001	-11.5967	-40.0696	-21.9727	-40.1001	-20.752	-40.1001	-31.1279	-40.1001	-42.7246	-40.0696	-98.2666	-40.0696	-29.9072	-40.1001	-66.5283	-40.0696	-45.166	-40.1001	-44.5557	-40.1001	-28.6865	-40.1001	-45.166	-40.1001	-30.5176	-40.1306	-64.0869	-40.1001	-37.8418	-40.0696	-38.4521	-40.0696	-50.6592	-40.1001
0.258	-19.5313	-40.1306	-8.54492	-40.1001	-10.9863	-40.1001	-13.4277	-40.1001	-27.4658	-40.1001	-33.5693	-40.0696	-27.4658	-40.1306	-91.5527	-40.1001	-56.1523	-40.1001	-94.6045	-40.1001	-44.5557	-40.1001	-38.4521	-40.1306	-40.8936	-40.0696	-43.9453	-40.1306	-32.3486	-40.1001	-67.1387	-40.1001	-55.542	-40.1001	-42.7246	-40.1001	-51.8799	-40.1306
0.2585	-14.0381	-40.0696	-21.3623	-40.1306	-15.2588	-40.0696	-26.2451	-40.1306	-20.752	-40.1001	-43.9453	-40.1306	-34.79	-40.1001	-106.812	-40.0696	-46.3867	-40.1306	-101.318	-40.1001	-44.5557	-40.0696	-53.1006	-40.1306	-37.2314	-40.1001	-32.959	-40.1306	-25.0244	-40.0696	-61.6455	-40.0696	-45.7764	-40.1001	-44.5557	-40.1001	-54.9316	-40.1001
0.259	-2.44141	-40.1306	-10.376	-40.1306	-20.1416	-40.1306	-21.3623	-40.1001	-21.3623	-40.1001	-37.8418	-40.0696	-27.4658	-40.1001	-90.332	-40.1001	-45.166	-40.1001	-99.4873	-40.1001	-36.0107	-40.1001	-59.2041	-40.1001	-31.7383	-40.0696	-26.2451	-40.1001	-23.1934	-40.1001	-50.6592	-40.1001	-26.2451	-40.1001	-51.2695	-40.1001	-45.7764	-40.1001
0.2595	-10.376	-40.1001	-8.54492	-40.0696	-12.8174	-40.1001	-6.71387	-40.1001	-21.9727	-40.1001	-29.9072	-40.1001	-37.8418	-40.1001	-83.0078	-40.1306	-37.2314	-40.1001	-105.591	-40.1306	-28.6865	-40.1001	-39.0625	-40.1001	-41.5039	-40.1306	-42.1143	-40.1001	-20.752	-40.1001	-37.8418	-40.1001	-44.5557	-40.1001	-52.4902	-40.1001	-43.335	-40.1001
0.26	-16.4795	-40.1001	-16.4795	-40.1001	-21.9727	-40.0696	-26.2451	-40.1306	-45.166	-40.1001	-31.7383	-40.1001	-49.4385	-40.0696	-86.6699	-40.0696	-62.8662	-40.1001	-88.501	-40.1001	-26.2451	-40.0696	-41.5039	-40.1001	-28.6865	-40.0391	-43.9453	-40.1001	-25.0244	-40.0696	-49.4385	-40.1001	-60.4248	-40.1001	-42.7246	-40.0696	-63.4766	-40.1306
0.2605	-8.54492	-40.1001	-21.9727	-40.0696	-23.1934	-40.1001	-20.752	-40.1001	-23.8037	-40.1001	-44.5557	-40.1001	-26.2451	-40.1001	-86.6699	-40.1001	-49.4385	-40.0696	-87.8906	-40.1001	-41.5039	-40.1001	-50.0488	-40.1001	-40.2832	-40.1001	-46.9971	-40.1001	-29.9072	-40.0696	-46.3867	-40.1306	-44.5557	-40.1001	-54.3213	-40.1306	-51.8799	-40.1001
0.261	-10.9863	-40.1306	-21.9727	-40.1001	-27.4658	-40.1001	-16.4795	-40.0696	-24.4141	-40.1001	-30.5176	-40.1001	-40.8936	-40.1001	-87.8906	-40.1001	-73.8525	-40.1001	-85.4492	-40.0696	-41.5039	-40.0696	-45.7764	-40.0696	-26.8555	-40.1001	-40.2832	-40.1001	-43.9453	-40.1001	-39.0625	-40.1001	-37.8418	-40.1001	-57.9834	-40.1001	-49.4385	-40.1001
0.2615	-15.8691	-40.1001	-21.9727	-40.1001	-23.8037	-40.1306	-24.4141	-40.1001	-28.6865	-40.1001	-31.1279	-40.1001	-46.9971	-40.1001	-89.7217	-40.1001	-52.4902	-40.1001	-74.4629	-40.1001	-29.9072	-40.0696	-51.8799	-40.1001	-29.9072	-40.0696	-50.0488	-40.1001	-52.4902	-40.1001	-38.4521	-40.1306	-56.1523	-40.1001	-41.5039	-40.1001	-47.6074	-40.0696
0.262	-10.9863	-40.1001	-20.1416	-40.1001	-13.4277	-40.1001	-23.1934	-40.1001	-19.5313	-40.1001	-36.6211	-40.0696	-45.166	-40.0696	-73.2422	-40.1001	-74.4629	-40.1001	-103.149	-40.1001	-36.6211	-40.1001	-49.4385	-40.1001	-29.9072	-40.1001	-30.5176	-40.1306	-29.9072	-40.1001	-53.1006	-40.0696	-51.2695	-40.1001	-43.335	-40.1001	-51.8799	-40.1001
0.2625	-14.0381	-40.1306	-15.2588	-40.1001	-32.959	-40.1001	-18.3105	-40.0696	-29.9072	-40.1001	-36.0107	-40.1001	-27.4658	-40.1306	-87.2803	-40.1001	-93.9941	-40.1306	-88.501	-40.1001	-34.79	-40.1001	-37.2314	-40.1306	-26.2451	-40.1001	-37.2314	-40.1001	-28.0762	-40.1306	-53.1006	-40.1001	-50.6592	-40.0696	-45.7764	-40.1001	-58.5938	-40.1001
0.263	-17.0898	-40.1001	-31.1279	-40.1001	-32.3486	-40.1001	-18.3105	-40.1306	-22.583	-40.1001	-35.4004	-40.1001	-45.7764	-40.1001	-98.2666	-40.1306	-91.5527	-40.1306	-65.3076	-40.1001	-28.0762	-40.1306	-45.166	-40.1306	-36.6211	-40.1306	-35.4004	-40.1001	-44.5557	-40.0696	-38.4521	-40.1306	-41.5039	-40.1001	-40.2832	-40.1306	-49.4385	-40.1306
0.2635	-7.32422	-40.1001	-14.6484	-40.1306	-26.8555	-40.1306	-17.0898	-40.1001	-37.8418	-40.1001	-38.4521	-40.1001	-36.6211	-40.1001	-104.98	-40.1001	-99.4873	-40.1306	-84.2285	-40.1001	-32.959	-40.1001	-45.166	-40.1001	-33.5693	-40.1001	-29.2969	-40.1001	-42.7246	-40.1001	-42.7246	-40.1001	-51.2695	-40.1001	-53.1006	-40.1306	-65.918	-40.1001
0.264	-9.76563	-40.1001	-14.6484	-40.1001	-7.93457	-40.1001	-20.1416	-40.1001	-39.0625	-40.1001	-39.6729	-40.1001	-34.79	-40.1001	-89.7217	-40.1306	-109.253	-40.1001	-87.8906	-40.1306	-22.583	-40.1001	-42.1143	-40.1001	-25.0244	-40.0696	-44.5557	-40.1306	-32.3486	-40.1001	-39.0625	-40.1306	-32.959	-40.1306	-49.4385	-40.1306	-70.1904	-40.0696
0.2645	-12.8174	-40.1001	-23.8037	-40.1306	-11.5967	-40.1001	-15.8691	-40.1001	-41.5039	-40.1306	-20.752	-40.0696	-30.5176	-40.1001	-79.9561	-40.1001	-86.0596	-40.0696	-76.9043	-40.1001	-29.2969	-40.1001	-53.7109	-40.1001	-34.79	-40.1001	-29.2969	-40.1001	-44.5557	-40.1001	-50.0488	-40.1001	-32.3486	-40.1001	-34.79	-40.0696	-65.918	-40.0696
0.265	-17.7002	-40.1001	-18.9209	-40.1001	-18.3105	-40.0696	-15.8691	-40.0391	-39.0625	-40.0696	-26.2451	-40.1001	-30.5176	-40.0696	-57.9834	-40.1001	-82.3975	-40.1001	-75.0732	-40.0696	-25.6348	-40.1001	-57.373	-40.1001	-54.3213	-40.1306	-45.7764	-40.1001	-48.2178	-40.1001	-46.3867	-40.0696	-50.0488	-40.1001	-54.3213	-40.1001	-68.3594	-40.0696
0.2655	-19.5313	-40.1001	-21.9727	-40.1001	-29.2969	-40.1001	-25.0244	-40.0696	-36.6211	-40.0696	-39.6729	-40.1001	-29.2969	-40.1001	-74.4629	-40.1001	-82.3975	-40.1001	-84.2285	-40.1306	-53.1006	-40.0696	-65.918	-40.1001	-46.9971	-40.1001	-46.9971	-40.1306	-46.9971	-40.1001	-42.7246	-40.1001	-43.335	-40.1001	-52.4902	-40.1306	-49.4385	-40.1001
0.266	-10.9863	-40.1001	-13.4277	-40.0696	-31.1279	-40.1306	-22.583	-40.1306	-15.2588	-40.1001	-29.9072	-40.1001	-41.5039	-40.1001	-88.501	-40.1001	-94.6045	-40.0696	-92.1631	-40.1306	-45.166	-40.1001	-47.6074	-40.1001	-31.1279	-40.1001	-43.9453	-40.0696	-45.166	-40.1001	-52.4902	-40.0696	-35.4004	-40.1001	-43.9453	-40.1001	-48.2178	-40.1001
0.2665	-14.0381	-40.1001	-10.376	-40.0696	-0.610352	-40.1001	-18.9209	-40.1001	-29.2969	-40.1001	-20.1416	-40.0696	-32.959	-40.1001	-86.0596	-40.1001	-78.125	-40.0696	-81.7871	-40.1001	-26.2451	-40.0696	-46.3867	-40.1001	-36.6211	-40.1306	-41.5039	-40.1001	-53.7109	-40.1001	-35.4004	-40.1001	-57.9834	-40.1306	-53.7109	-40.1306	-55.542	-40.1001
0.267	-11.5967	-40.1306	-20.752	-40.1001	-15.8691	-40.1306	-18.3105	-40.0696	-29.9072	-40.1001	-26.2451	-40.1306	-39.0625	-40.0696	-79.3457	-40.1001	-88.501	-40.1306	-89.7217	-40.1001	-39.0625	-40.1306	-53.1006	-40.0696	-46.3867	-40.1001	-48.8281	-40.1001	-42.1143	-40.1001	-46.9971	-40.0696	-42.1143	-40.1001	-53.7109	-40.1001	-56.1523	-40.1306
0.2675	-15.2588	-40.0696	-13.4277	-40.1001	-14.0381	-40.1306	-12.8174	-40.1001	-20.752	-40.1001	-43.9453	-40.0696	-48.2178	-40.1001	-108.643	-40.1306	-72.6318	-40.0696	-88.501	-40.1001	-29.9072	-40.1001	-52.4902	-40.1001	-36.6211	-40.1001	-34.1797	-40.1306	-46.9971	-40.0696	-35.4004	-40.1001	-54.9316	-40.1306	-48.2178	-40.1306	-62.2559	-40.1001
0.268	-23.8037	-40.1001	-24.4141	-40.1001	-13.4277	-40.1306	-23.8037	-40.1001	-33.5693	-40.0696	-38.4521	-40.1001	-45.7764	-40.1001	-93.9941	-40.1001	-77.5146	-40.1001	-79.3457	-40.1001	-34.1797	-40.1001	-70.8008	-40.1001	-50.6592	-40.1001	-36.0107	-40.0696	-36.0107	-40.1001	-43.335	-40.1001	-46.9971	-40.1001	-54.3213	-40.1001	-41.5039	-40.1306
0.2685	-13.4277	-40.1001	-24.4141	-40.1001	-11.5967	-40.1001	-23.1934	-40.1001	-17.7002	-40.1001	-51.8799	-40.1001	-26.8555	-40.1306	-109.863	-40.0696	-92.1631	-40.0696	-96.4355	-40.0696	-31.7383	-40.1001	-54.3213	-40.1001	-43.335	-40.1001	-40.2832	-40.1001	-34.79	-40.1001	-49.4385	-40.1001	-36.6211	-40.1001	-51.8799	-40.1001	-46.9971	-40.1001
0.269	-20.1416	-40.1001	-14.6484	-40.1001	-14.0381	-40.1001	-24.4141	-40.1001	-14.0381	-40.1001	-46.9971	-40.0696	-29.2969	-40.1001	-114.136	-40.1306	-73.8525	-40.0696	-103.76	-40.1001	-37.2314	-40.0696	-41.5039	-40.1001	-41.5039	-40.1001	-31.7383	-40.1001	-36.6211	-40.1001	-31.1279	-40.1001	-42.1143	-40.1001	-49.4385	-40.1001	-57.373	-40.1001
0.2695	-7.32422	-40.1306	-26.2451	-40.1001	-32.959	-40.0696	-18.3105	-40.0696	-25.0244	-40.1611	-45.166	-40.0696	-34.1797	-40.1306	-120.239	-40.0696	-100.098	-40.0696	-110.474	-40.1001	-39.0625	-40.0696	-56.1523	-40.1001	-40.2832	-40.1001	-39.0625	-40.1306	-32.3486	-40.0696	-54.9316	-40.1001	-45.7764	-40.1001	-54.9316	-40.1001	-60.4248	-40.1001
0.27	-25.0244	-40.1001	-20.752	-40.1001	-23.1934	-40.0696	-22.583	-40.1001	-7.32422	-40.1306	-40.2832	-40.0696	-31.7383	-40.1001	-100.708	-40.1001	-93.9941	-40.1001	-106.812	-40.1306	-42.7246	-40.1001	-49.4385	-40.0696	-50.6592	-40.1001	-31.1279	-40.0696	-32.959	-40.0696	-54.3213	-40.0696	-41.5039	-40.1001	-38.4521	-40.1001	-48.8281	-40.0696
0.2705	-28.0762	-40.1001	-21.3623	-40.1001	-15.8691	-40.0696	-14.6484	-40.1001	-12.207	-40.1001	-43.335	-40.1001	-52.4902	-40.1306	-80.5664	-40.1001	-95.2148	-40.1306	-117.188	-40.0696	-41.5039	-40.1001	-76.2939	-40.1001	-43.9453	-40.1001	-31.7383	-40.1001	-28.6865	-40.1001	-60.4248	-40.0696	-40.8936	-40.1001	-47.6074	-40.1306	-48.8281	-40.1001
0.271	-24.4141	-40.1001	-14.0381	-40.0696	-11.5967	-40.1001	-23.1934	-40.1306	-10.9863	-40.1001	-40.8936	-40.1001	-45.166	-40.1001	-73.2422	-40.1001	-84.8389	-40.1001	-104.98	-40.1306	-40.2832	-40.1306	-56.1523	-40.1001	-32.3486	-40.1001	-37.2314	-40.0696	-47.6074	-40.0696	-49.4385	-40.1001	-40.8936	-40.1001	-60.4248	-40.1001	-46.9971	-40.1001
0.2715	-18.9209	-40.1001	-18.9209	-40.0696	-32.959	-40.1001	-14.6484	-40.0696	-10.9863	-40.1001	-31.1279	-40.1001	-23.1934	-40.1001	-94.6045	-40.1001	-90.9424	-40.1001	-112.915	-40.1306	-46.9971	-40.1001	-46.9971	-40.0696	-36.6211	-40.1001	-32.3486	-40.1001	-30.5176	-40.1001	-53.1006	-40.1001	-32.3486	-40.1001	-43.9453	-40.1001	-37.2314	-40.0696
0.272	-15.8691	-40.1001	-21.3623	-40.1001	-12.8174	-40.1001	-21.9727	-40.1001	-28.0762	-40.0696	-40.8936	-40.1306	-27.4658	-40.1001	-89.1113	-40.1306	-89.1113	-40.1001	-103.76	-40.1001	-40.2832	-40.1001	-45.7764	-40.1001	-45.7764	-40.0696	-30.5176	-40.1001	-41.5039	-40.1001	-46.9971	-40.0696	-42.1143	-40.0696	-46.9971	-40.1001	-52.4902	-40.1306
0.2725	-31.7383	-40.1001	-9.15527	-40.1001	-15.2588	-40.0696	-30.5176	-40.0696	-11.5967	-40.1306	-50.6592	-40.1306	-16.4795	-40.1001	-94.6045	-40.1001	-87.8906	-40.1001	-109.253	-40.0696	-36.6211	-40.1001	-42.7246	-40.1001	-33.5693	-40.1001	-43.335	-40.1001	-40.2832	-40.1001	-42.1143	-40.1306	-32.959	-40.1001	-43.9453	-40.1001	-56.1523	-40.1001
0.273	-25.0244	-40.1001	-16.4795	-40.1306	-19.5313	-40.0696	-18.9209	-40.1001	-18.3105	-40.1001	-46.9971	-40.1001	-36.0107	-40.1001	-84.2285	-40.0696	-93.3838	-40.1001	-98.877	-40.1001	-50.0488	-40.1001	-51.2695	-40.1001	-30.5176	-40.1001	-30.5176	-40.1306	-46.3867	-40.1001	-59.8145	-40.1306	-46.9971	-40.0696	-34.1797	-40.1001	-50.6592	-40.1001
0.2735	-31.1279	-40.1001	-15.8691	-40.0696	-16.4795	-40.1001	-22.583	-40.1306	-20.752	-40.1001	-36.0107	-40.1306	-34.79	-40.1001	-109.253	-40.0696	-108.032	-40.0696	-93.3838	-40.1001	-36.6211	-40.1001	-41.5039	-40.0696	-36.0107	-40.0696	-37.8418	-40.0696	-40.8936	-40.0696	-43.335	-40.1001	-40.8936	-40.1306	-50.0488	-40.1001	-58.5938	-40.1001
0.274	-10.9863	-40.1001	-17.0898	-40.1306	-9.15527	-40.1001	-15.8691	-40.1001	-20.752	-40.0696	-38.4521	-40.1001	-65.3076	-40.1001	-84.2285	-40.1001	-98.877	-40.1001	-90.9424	-40.1306	-48.8281	-40.1306	-50.0488	-40.1001	-36.6211	-40.1001	-31.1279	-40.1306	-40.2832	-40.1001	-39.6729	-40.1306	-37.8418	-40.1001	-55.542	-40.0696	-46.3867	-40.0696
0.2745	-20.752	-40.0696	-7.32422	-40.1001	-23.1934	-40.1001	-15.8691	-40.1001	-21.9727	-40.0696	-36.0107	-40.1001	-34.79	-40.1001	-90.9424	-40.0696	-104.37	-40.0696	-84.2285	-40.1306	-36.6211	-40.0696	-57.373	-40.0696	-69.5801	-40.1001	-27.4658	-40.1306	-32.3486	-40.0696	-51.8799	-40.0696	-40.2832	-40.1001	-57.9834	-40.1001	-51.8799	-40.1001
0.275	-28.0762	-40.1001	-17.0898	-40.1001	0	-40.1001	-22.583	-40.1001	-21.9727	-40.1306	-38.4521	-40.1001	-34.1797	-40.1001	-73.8525	-40.1001	-114.746	-40.1001	-66.5283	-40.1001	-40.8936	-40.1306	-50.6592	-40.1001	-51.8799	-40.1001	-37.8418	-40.1001	-42.1143	-40.0696	-56.1523	-40.1306	-42.7246	-40.1001	-57.373	-40.1001	-62.8662	-40.1306
0.2755	-15.2588	-40.1001	-3.66211	-40.1001	-17.0898	-40.1001	-18.3105	-40.1001	-19.5313	-40.0696	-29.2969	-40.0696	-37.8418	-40.1306	-95.2148	-40.1306	-97.6563	-40.1001	-69.5801	-40.1001	-45.166	-40.1001	-42.1143	-40.1001	-39.6729	-40.1001	-35.4004	-40.1001	-32.959	-40.1001	-56.1523	-40.1001	-32.959	-40.0696	-55.542	-40.1001	-47.6074	-40.1306
0.276	-18.9209	-40.1001	-36.6211	-40.1001	-29.9072	-40.1001	-21.9727	-40.1001	-14.0381	-40.1001	-32.3486	-40.1001	-40.2832	-40.1001	-89.1113	-40.1001	-96.4355	-40.1001	-65.3076	-40.1001	-37.8418	-40.1001	-51.8799	-40.1306	-49.4385	-40.1001	-31.7383	-40.1001	-39.0625	-40.1001	-52.4902	-40.1001	-35.4004	-40.0696	-53.7109	-40.0696	-43.9453	-40.1001
0.2765	-18.9209	-40.1306	-15.8691	-40.1001	-11.5967	-40.1306	-28.0762	-40.1001	-22.583	-40.1001	-46.3867	-40.1001	-37.8418	-40.1001	-76.2939	-40.1306	-97.0459	-40.1306	-68.3594	-40.0696	-35.4004	-40.1001	-68.3594	-40.1001	-50.6592	-40.1306	-20.752	-40.1001	-31.7383	-40.1306	-51.2695	-40.1001	-23.8037	-40.1001	-46.9971	-40.1001	-58.5938	-40.1001
0.277	-25.6348	-40.1306	-20.1416	-40.1001	1.2207	-40.1001	-31.1279	-40.1001	-23.1934	-40.1001	-32.959	-40.0696	-42.1143	-40.1001	-89.1113	-40.1001	-92.1631	-40.0696	-50.0488	-40.1001	-40.8936	-40.1306	-72.6318	-40.0696	-50.0488	-40.0696	-29.2969	-40.1001	-43.9453	-40.1001	-68.3594	-40.1306	-36.0107	-40.1001	-42.7246	-40.1001	-52.4902	-40.1306
0.2775	-24.4141	-40.1001	-18.9209	-40.1001	-12.8174	-40.1001	-26.2451	-40.1001	-10.9863	-40.1001	-35.4004	-40.0696	-42.1143	-40.1001	-70.8008	-40.0696	-103.149	-40.1001	-78.125	-40.1001	-48.2178	-40.1001	-43.335	-40.1001	-43.9453	-40.1001	-43.335	-40.1001	-28.0762	-40.1001	-72.0215	-40.1001	-42.1143	-40.1001	-45.166	-40.1001	-50.6592	-40.0696
0.278	-34.1797	-40.1001	-5.49316	-40.1001	-23.8037	-40.1001	-14.6484	-40.1001	-29.2969	-40.1306	-34.1797	-40.1001	-36.6211	-40.0696	-74.4629	-40.0696	-84.8389	-40.1001	-77.5146	-40.1001	-43.335	-40.1306	-58.5938	-40.1001	-46.3867	-40.1001	-43.335	-40.0696	-31.1279	-40.1001	-51.2695	-40.0696	-55.542	-40.0696	-59.8145	-40.1001	-59.8145	-40.1001
0.2785	-43.335	-40.1001	-23.8037	-40.1001	-20.752	-40.0696	-19.5313	-40.1001	-23.1934	-40.1001	-42.7246	-40.1001	-36.0107	-40.1306	-92.1631	-40.0696	-97.0459	-40.1001	-108.032	-40.1001	-40.2832	-40.1001	-69.5801	-40.1001	-40.2832	-40.1001	-36.6211	-40.1001	-25.6348	-40.1001	-51.2695	-40.0696	-34.1797	-40.1001	-50.0488	-40.1001	-60.4248	-40.1306
0.279	-20.1416	-40.0696	-20.752	-40.1306	-14.6484	-40.1001	-27.4658	-40.0696	-32.959	-40.0696	-30.5176	-40.1001	-31.1279	-40.1001	-76.2939	-40.1001	-98.2666	-40.1001	-93.3838	-40.1001	-29.9072	-40.1001	-57.373	-40.1306	-28.0762	-40.1001	-43.335	-40.0696	-39.0625	-40.1001	-44.5557	-40.0696	-40.2832	-40.0696	-52.4902	-40.1001	-53.7109	-40.1306
0.2795	-32.3486	-40.1001	-30.5176	-40.1001	-10.376	-40.1306	-12.8174	-40.1001	-21.9727	-40.0696	-39.0625	-40.1001	-45.166	-40.0696	-71.4111	-40.1001	-103.149	-40.1001	-100.098	-40.1001	-35.4004	-40.1001	-64.6973	-40.0696	-29.2969	-40.1001	-40.8936	-40.1306	-30.5176	-40.1001	-43.9453	-40.0696	-45.7764	-40.1001	-39.6729	-40.1001	-52.4902	-40.1001
0.28	-25.0244	-40.1001	-25.6348	-40.1001	-19.5313	-40.1001	-20.1416	-40.1001	-26.8555	-40.0696	-27.4658	-40.1001	-45.166	-40.1001	-84.2285	-40.1001	-108.643	-40.1001	-105.591	-40.1306	-34.79	-40.1001	-47.6074	-40.1306	-32.3486	-40.1001	-47.6074	-40.1001	-37.8418	-40.1001	-52.4902	-40.1306	-36.6211	-40.1001	-43.9453	-40.1001	-53.1006	-40.1001
0.2805	-22.583	-40.1001	-18.9209	-40.1001	-22.583	-40.1001	-21.3623	-40.1001	-18.3105	-40.1001	-35.4004	-40.1306	-24.4141	-40.1306	-68.9697	-40.1001	-92.1631	-40.1001	-98.2666	-40.1306	-37.2314	-40.1001	-43.9453	-40.1001	-37.8418	-40.1001	-53.1006	-40.1001	-45.166	-40.1001	-38.4521	-40.1001	-49.4385	-40.1001	-45.166	-40.1001	-57.373	-40.1001
0.281	-19.5313	-40.0696	-32.959	-40.1306	-9.76563	-40.1001	-18.9209	-40.1001	-23.8037	-40.1001	-26.8555	-40.1001	-41.5039	-40.1001	-87.2803	-40.1001	-117.188	-40.1001	-81.7871	-40.0696	-37.8418	-40.0696	-51.2695	-40.1001	-44.5557	-40.1001	-42.1143	-40.1306	-32.959	-40.0696	-48.8281	-40.1001	-37.2314	-40.1001	-46.3867	-40.1001	-61.0352	-40.1001
0.2815	-21.3623	-40.1001	-15.8691	-40.1001	-21.3623	-40.0696	-20.752	-40.0696	-28.6865	-40.1001	-28.0762	-40.1001	-41.5039	-40.1306	-54.9316	-40.0696	-100.708	-40.1001	-92.7734	-40.1001	-40.8936	-40.1306	-44.5557	-40.1001	-45.7764	-40.0696	-38.4521	-40.1001	-39.0625	-40.1001	-32.959	-40.1001	-40.2832	-40.1001	-36.6211	-40.1001	-42.7246	-40.1001
0.282	-23.1934	-40.1001	-23.8037	-40.1001	-5.49316	-40.1001	-12.8174	-40.1001	-21.3623	-40.0696	-43.9453	-40.0696	-28.6865	-40.1306	-56.1523	-40.0696	-103.149	-40.1001	-88.501	-40.1001	-32.3486	-40.0696	-43.9453	-40.1001	-44.5557	-40.1001	-34.1797	-40.1001	-25.0244	-40.1001	-48.8281	-40.1001	-46.9971	-40.1001	-32.3486	-40.1001	-51.8799	-40.1001
0.2825	-12.207	-40.0696	-29.9072	-40.1306	-21.9727	-40.1001	-9.15527	-40.1001	-25.0244	-40.0696	-32.3486	-40.1001	-46.9971	-40.1001	-45.166	-40.0696	-98.2666	-40.1306	-88.501	-40.1001	-45.166	-40.1001	-57.9834	-40.1306	-41.5039	-40.0696	-46.9971	-40.1001	-46.3867	-40.0696	-38.4521	-40.1001	-42.7246	-40.1306	-34.79	-40.1001	-54.9316	-40.1001
0.283	-17.7002	-40.1001	-3.66211	-40.1306	-20.1416	-40.1001	-9.15527	-40.1001	-20.1416	-40.1001	-34.79	-40.1306	-54.3213	-40.0696	-55.542	-40.1306	-115.356	-40.1001	-101.318	-40.1001	-30.5176	-40.0696	-43.9453	-40.1306	-28.6865	-40.1001	-38.4521	-40.1001	-42.7246	-40.1306	-38.4521	-40.0696	-43.335	-40.1001	-47.6074	-40.1001	-55.542	-40.1306
0.2835	-22.583	-40.1306	-23.8037	-40.1001	-12.207	-40.1306	-23.1934	-40.1306	-20.752	-40.1001	-39.6729	-40.0696	-31.7383	-40.1001	-101.929	-40.1001	-106.201	-40.1306	-86.6699	-40.1001	-39.6729	-40.0696	-42.1143	-40.1001	-29.2969	-40.1001	-32.959	-40.1001	-33.5693	-40.1001	-54.9316	-40.1001	-25.0244	-40.1001	-33.5693	-40.1001	-57.9834	-40.1001
0.284	-23.1934	-40.1001	-24.4141	-40.1001	-34.1797	-40.1306	-14.0381	-40.1306	-29.9072	-40.1001	-27.4658	-40.1001	-32.959	-40.0696	-98.2666	-40.0696	-96.4355	-40.0696	-94.6045	-40.0696	-34.1797	-40.1001	-42.1143	-40.0696	-31.7383	-40.1001	-48.8281	-40.0696	-36.6211	-40.1001	-42.1143	-40.1001	-42.1143	-40.1001	-42.1143	-40.0696	-54.9316	-40.0696
0.2845	-17.0898	-40.1001	-17.0898	-40.1001	-14.6484	-40.1001	-21.9727	-40.1001	-30.5176	-40.1001	-39.0625	-40.1001	-34.79	-40.1001	-103.149	-40.1001	-98.2666	-40.1001	-99.4873	-40.0696	-33.5693	-40.1001	-51.2695	-40.1001	-48.2178	-40.1001	-51.2695	-40.1001	-37.2314	-40.1306	-29.9072	-40.1001	-43.9453	-40.1001	-37.2314	-40.1001	-58.5938	-40.1001
0.285	-10.9863	-40.1001	-21.9727	-40.0696	-10.9863	-40.1001	-28.6865	-40.1001	-23.1934	-40.1306	-46.9971	-40.1001	-42.1143	-40.1001	-106.812	-40.1001	-81.1768	-40.1001	-78.7354	-40.1001	-29.2969	-40.0696	-54.3213	-40.1001	-37.2314	-40.1001	-46.3867	-40.1001	-39.6729	-40.1306	-36.6211	-40.1306	-45.166	-40.1001	-39.0625	-40.1001	-47.6074	-40.1306
0.2855	-25.0244	-40.0696	-15.2588	-40.1001	-11.5967	-40.0696	-8.54492	-40.0696	-26.2451	-40.0696	-48.8281	-40.1001	-25.0244	-40.1001	-98.2666	-40.1001	-98.877	-40.1001	-92.1631	-40.1001	-34.79	-40.1001	-49.4385	-40.1001	-19.5313	-40.1001	-32.959	-40.0696	-45.7764	-40.1001	-57.373	-40.1001	-39.6729	-40.1001	-56.7627	-40.0696	-57.9834	-40.1001
0.286	-7.32422	-40.1001	-18.3105	-40.1001	-9.76563	-40.1001	-20.1416	-40.0696	-16.4795	-40.1001	-29.2969	-40.1001	-32.959	-40.1001	-85.4492	-40.1306	-116.577	-40.1001	-93.9941	-40.1001	-28.0762	-40.1306	-56.7627	-40.1001	-48.2178	-40.1001	-40.8936	-40.1001	-31.7383	-40.1001	-37.8418	-40.0696	-39.0625	-40.1306	-49.4385	-40.1001	-51.2695	-40.1001
0.2865	-28.6865	-40.0696	-12.207	-40.1001	-14.0381	-40.0696	-25.0244	-40.0696	-30.5176	-40.1001	-41.5039	-40.0696	-46.9971	-40.1001	-106.812	-40.1001	-106.812	-40.1001	-92.1631	-40.1306	-25.0244	-40.1001	-48.2178	-40.1001	-52.4902	-40.1306	-34.1797	-40.0696	-37.8418	-40.1306	-50.0488	-40.1001	-53.1006	-40.1001	-45.7764	-40.1001	-57.9834	-40.1306
0.287	-19.5313	-40.1001	-23.8037	-40.1306	-17.7002	-40.1001	-22.583	-40.1001	-19.5313	-40.0696	-39.6729	-40.1001	-37.2314	-40.0696	-79.3457	-40.1306	-78.7354	-40.1306	-81.1768	-40.1001	-30.5176	-40.1306	-37.2314	-40.0696	-57.373	-40.1001	-42.7246	-40.0696	-50.0488	-40.1001	-49.4385	-40.1001	-59.8145	-40.1001	-51.8799	-40.1001	-57.373	-40.1001
0.2875	-26.8555	-40.1001	-12.207	-40.1001	-26.8555	-40.1001	-17.7002	-40.0696	-17.7002	-40.1001	-37.2314	-40.1001	-42.1143	-40.1001	-103.76	-40.0696	-81.1768	-40.1306	-95.2148	-40.1611	-30.5176	-40.0696	-29.9072	-40.0696	-58.5938	-40.1306	-36.0107	-40.0696	-41.5039	-40.1001	-42.7246	-40.1001	-51.8799	-40.1001	-53.7109	-40.1001	-53.1006	-40.1001
0.288	-20.752	-40.1001	-15.8691	-40.1001	-23.1934	-40.1306	-32.3486	-40.1001	-18.9209	-40.1001	-45.7764	-40.0696	-34.1797	-40.1001	-115.356	-40.1001	-62.2559	-40.1001	-75.0732	-40.1001	-31.7383	-40.1001	-56.1523	-40.1306	-38.4521	-40.0696	-45.166	-40.1001	-25.6348	-40.1001	-46.9971	-40.1001	-41.5039	-40.1001	-45.7764	-40.1306	-59.2041	-40.0696
0.2885	-20.1416	-40.1306	-10.376	-40.0696	-18.9209	-40.1001	-23.1934	-40.1001	-15.2588	-40.1001	-36.6211	-40.1001	-34.79	-40.1306	-87.2803	-40.1001	-79.3457	-40.1001	-70.1904	-40.0696	-30.5176	-40.1001	-47.6074	-40.0696	-44.5557	-40.1306	-31.1279	-40.1001	-39.6729	-40.1001	-50.0488	-40.1001	-46.3867	-40.1001	-46.3867	-40.0696	-53.7109	-40.0696
0.289	-12.8174	-40.1001	-12.207	-40.1001	-31.1279	-40.0696	-21.3623	-40.1001	-1.83105	-40.0696	-34.79	-40.1001	-42.7246	-40.0696	-86.0596	-40.1001	-67.1387	-40.1001	-80.5664	-40.0696	-37.2314	-40.1001	-45.166	-40.0696	-37.8418	-40.1306	-36.6211	-40.1001	-30.5176	-40.1001	-36.0107	-40.1001	-42.1143	-40.1001	-51.2695	-40.0391	-48.8281	-40.1001
0.2895	-22.583	-40.1001	-30.5176	-40.1001	-16.4795	-40.0696	-20.752	-40.1001	-10.376	-40.1306	-32.959	-40.0696	-40.2832	-40.1306	-64.0869	-40.1001	-62.2559	-40.1001	-84.2285	-40.1306	-29.2969	-40.1001	-37.8418	-40.1001	-49.4385	-40.1001	-39.0625	-40.1001	-46.3867	-40.1306	-55.542	-40.1306	-44.5557	-40.0696	-48.8281	-40.0391	-69.5801	-40.1001
0.29	-14.0381	-40.1001	-16.4795	-40.1001	-29.9072	-40.1001	-18.9209	-40.0696	-23.1934	-40.0696	-39.6729	-40.0696	-41.5039	-40.1306	-80.5664	-40.1001	-77.5146	-40.1001	-79.9561	-40.1001	-41.5039	-40.1001	-33.5693	-40.1001	-36.0107	-40.1001	-50.6592	-40.1001	-50.0488	-40.1001	-48.8281	-40.1001	-36.6211	-40.0696	-46.9971	-40.1001	-48.2178	-40.1001
0.2905	-28.6865	-40.0696	-25.0244	-40.1001	-21.9727	-40.1001	-12.8174	-40.1001	-21.9727	-40.1001	-31.7383	-40.1001	-38.4521	-40.1001	-102.539	-40.1001	-81.7871	-40.1001	-80.5664	-40.0696	-37.2314	-40.1306	-41.5039	-40.1001	-33.5693	-40.1001	-31.7383	-40.1001	-44.5557	-40.1001	-48.2178	-40.1001	-45.166	-40.1001	-38.4521	-40.1306	-53.1006	-40.1001
0.291	-20.752	-40.1001	-16.4795	-40.1001	-12.8174	-40.1306	-18.9209	-40.1306	-14.0381	-40.1001	-31.1279	-40.1001	-28.0762	-40.0696	-104.98	-40.1001	-82.3975	-40.1306	-92.1631	-40.1001	-31.1279	-40.1001	-60.4248	-40.1001	-37.8418	-40.1001	-29.9072	-40.0696	-46.9971	-40.0696	-31.1279	-40.1001	-37.2314	-40.1001	-51.2695	-40.1001	-46.9971	-40.1001
0.2915	-37.2314	-40.1001	-6.71387	-40.0696	-14.0381	-40.1001	-20.752	-40.1001	-23.8037	-40.1001	-29.2969	-40.0696	-45.7764	-40.1001	-87.8906	-40.0696	-90.9424	-40.1306	-99.4873	-40.1001	-29.9072	-40.1001	-50.0488	-40.1001	-29.9072	-40.1001	-37.8418	-40.0696	-46.9971	-40.1001	-56.7627	-40.1306	-31.7383	-40.1001	-43.9453	-40.1001	-50.0488	-40.1001
0.292	-8.54492	-40.1001	-29.2969	-40.1001	-12.207	-40.1001	-22.583	-40.1001	-23.8037	-40.1001	-34.1797	-40.1001	-31.1279	-40.1001	-61.6455	-40.0696	-103.149	-40.1306	-68.3594	-40.1001	-39.0625	-40.0696	-40.2832	-40.1001	-47.6074	-40.1001	-41.5039	-40.1001	-31.1279	-40.1001	-45.7764	-40.1001	-32.3486	-40.0696	-48.8281	-40.1306	-54.3213	-40.0696
0.2925	-17.0898	-40.1001	-20.752	-40.1001	-23.8037	-40.1001	-32.959	-40.1001	-28.6865	-40.1001	-50.0488	-40.1001	-23.1934	-40.1001	-91.5527	-40.0696	-72.0215	-40.1306	-77.5146	-40.1306	-46.9971	-40.1306	-51.8799	-40.0696	-32.3486	-40.0696	-28.0762	-40.1001	-42.1143	-40.1001	-39.6729	-40.1306	-31.7383	-40.1001	-51.2695	-40.1001	-51.2695	-40.0696
0.293	-14.6484	-40.1001	-21.9727	-40.1001	-21.9727	-40.1001	-26.2451	-40.1001	-20.1416	-40.1001	-37.8418	-40.1001	-34.1797	-40.1001	-58.5938	-40.0696	-100.708	-40.0696	-87.8906	-40.1001	-34.1797	-40.1001	-40.8936	-40.1001	-44.5557	-40.1001	-57.373	-40.0696	-32.959	-40.0696	-51.8799	-40.1001	-48.2178	-40.1001	-48.2178	-40.0696	-43.335	-40.1001
0.2935	-37.8418	-40.1001	-30.5176	-40.1001	-18.9209	-40.1001	-25.6348	-40.0696	-8.54492	-40.1001	-47.6074	-40.0696	-50.0488	-40.1001	-81.1768	-40.0696	-79.9561	-40.1001	-76.9043	-40.0696	-31.7383	-40.0696	-44.5557	-40.0696	-45.166	-40.1001	-37.2314	-40.1001	-37.8418	-40.1001	-50.6592	-40.1306	-33.5693	-40.1001	-36.6211	-40.1306	-59.2041	-40.0696
0.294	-15.8691	-40.1001	-24.4141	-40.1001	-11.5967	-40.0696	-23.8037	-40.1306	-21.3623	-40.1001	-42.7246	-40.1001	-34.1797	-40.1001	-75.6836	-40.1001	-81.1768	-40.1001	-65.3076	-40.1001	-43.335	-40.1001	-29.9072	-40.1001	-50.6592	-40.0696	-34.1797	-40.0696	-37.2314	-40.1001	-50.6592	-40.1001	-37.8418	-40.1001	-30.5176	-40.1306	-64.6973	-40.1001
0.2945	-25.6348	-40.1001	-10.376	-40.1306	-1.2207	-40.1001	-34.79	-40.1306	-15.2588	-40.1001	-52.4902	-40.1306	-36.6211	-40.1001	-82.3975	-40.1306	-48.8281	-40.1001	-73.2422	-40.1001	-44.5557	-40.1001	-42.7246	-40.1001	-51.2695	-40.1001	-40.8936	-40.1001	-43.9453	-40.1001	-48.8281	-40.1306	-43.335	-40.1306	-43.9453	-40.1306	-56.1523	-40.1001
0.295	-26.2451	-40.1001	-21.9727	-40.1001	-4.88281	-40.0696	-24.4141	-40.0696	-7.93457	-40.1001	-51.8799	-40.0696	-38.4521	-40.1001	-76.9043	-40.1001	-63.4766	-40.1306	-84.2285	-40.1001	-33.5693	-40.1306	-40.2832	-40.1001	-45.166	-40.0696	-45.7764	-40.1001	-31.1279	-40.1306	-32.3486	-40.0696	-37.8418	-40.1306	-33.5693	-40.1001	-44.5557	-40.1306
0.2955	-16.4795	-40.1001	-35.4004	-40.1306	-9.76563	-40.0696	-15.2588	-40.1001	-17.7002	-40.1001	-45.7764	-40.1001	-42.7246	-40.1306	-110.474	-40.0696	-58.5938	-40.1001	-69.5801	-40.1001	-42.7246	-40.1001	-44.5557	-40.1306	-49.4385	-40.1001	-47.6074	-40.0696	-35.4004	-40.1306	-46.9971	-40.1001	-47.6074	-40.1001	-39.0625	-40.1001	-46.3867	-40.1001
0.296	-12.207	-40.1001	-20.1416	-40.1001	-23.1934	-40.1306	-21.9727	-40.1306	-14.0381	-40.1001	-51.2695	-40.0696	-37.2314	-40.1306	-80.5664	-40.1306	-76.9043	-40.1306	-77.5146	-40.1001	-41.5039	-40.1001	-49.4385	-40.1001	-39.6729	-40.1306	-37.8418	-40.1001	-34.1797	-40.1001	-62.2559	-40.1001	-40.2832	-40.1306	-46.9971	-40.1001	-58.5938	-40.1001
0.2965	-34.79	-40.0696	-31.1279	-40.1001	-18.9209	-40.1001	-20.752	-40.1306	-23.1934	-40.1001	-49.4385	-40.1001	-28.6865	-40.0696	-91.5527	-40.1001	-59.8145	-40.1001	-81.7871	-40.1001	-48.2178	-40.0696	-53.1006	-40.1001	-54.9316	-40.1001	-40.2832	-40.1001	-37.2314	-40.0696	-48.8281	-40.1001	-32.959	-40.0696	-43.9453	-40.0696	-57.9834	-40.0696
0.297	-18.9209	-40.1001	-17.0898	-40.1306	-8.54492	-40.1001	-25.6348	-40.1306	-21.3623	-40.1306	-35.4004	-40.1001	-43.335	-40.1001	-76.2939	-40.1001	-81.7871	-40.1001	-75.6836	-40.1306	-31.7383	-40.1001	-45.7764	-40.1001	-49.4385	-40.1306	-31.1279	-40.1001	-42.1143	-40.1001	-49.4385	-40.1001	-46.9971	-40.0696	-53.7109	-40.1001	-61.0352	-40.1001
0.2975	-21.3623	-40.1001	-18.9209	-40.1001	-18.9209	-40.0696	-22.583	-40.0696	-18.9209	-40.1001	-38.4521	-40.1001	-38.4521	-40.1001	-86.6699	-40.1001	-101.318	-40.1001	-74.4629	-40.1001	-39.6729	-40.0696	-34.79	-40.1001	-42.1143	-40.0696	-42.1143	-40.1001	-40.2832	-40.1001	-57.373	-40.1001	-49.4385	-40.1001	-56.7627	-40.1001	-57.9834	-40.1001
0.298	-24.4141	-40.0696	-15.8691	-40.1001	-13.4277	-40.1001	-13.4277	-40.0696	-17.7002	-40.1306	-43.9453	-40.1001	-44.5557	-40.1001	-84.2285	-40.1001	-98.877	-40.1001	-86.0596	-40.0696	-30.5176	-40.1306	-44.5557	-40.1306	-22.583	-40.1001	-56.7627	-40.1001	-50.0488	-40.0696	-54.3213	-40.1001	-25.6348	-40.1001	-39.0625	-40.1001	-68.9697	-40.0391
0.2985	-21.3623	-40.1001	-20.1416	-40.1001	-20.1416	-40.0696	-28.0762	-40.1306	-24.4141	-40.1001	-42.7246	-40.1001	-40.2832	-40.1001	-67.1387	-40.0696	-60.4248	-40.1306	-87.2803	-40.1001	-27.4658	-40.0696	-50.0488	-40.1001	-24.4141	-40.1001	-50.0488	-40.0696	-37.8418	-40.1001	-42.7246	-40.1001	-32.959	-40.1306	-38.4521	-40.1001	-66.5283	-40.1306
0.299	-10.376	-40.0696	-31.1279	-40.1001	-19.5313	-40.1001	-24.4141	-40.1001	-19.5313	-40.1306	-50.0488	-40.1001	-56.1523	-40.1001	-83.6182	-40.1001	-69.5801	-40.0696	-72.0215	-40.1001	-37.8418	-40.1001	-47.6074	-40.1001	-40.8936	-40.0391	-36.6211	-40.1001	-42.1143	-40.1001	-56.1523	-40.1001	-42.1143	-40.1611	-37.8418	-40.0696	-68.3594	-40.1306
0.2995	-25.6348	-40.1001	-26.8555	-40.1001	-27.4658	-40.1001	-28.0762	-40.1001	-19.5313	-40.1306	-48.8281	-40.1001	-52.4902	-40.0696	-86.0596	-40.1306	-89.7217	-40.1001	-59.8145	-40.1001	-30.5176	-40.1001	-45.166	-40.1001	-37.2314	-40.1001	-50.0488	-40.1001	-34.1797	-40.1001	-64.6973	-40.1001	-43.335	-40.1001	-40.2832	-40.0696	-69.5801	-40.1001
0.3	-10.9863	-40.1306	-15.2588	-40.1001	-17.0898	-40.0696	-34.1797	-40.1001	-19.5313	-40.1306	-41.5039	-40.1306	-55.542	-40.1001	-73.8525	-40.1306	-76.9043	-40.1306	-45.166	-40.1001	-30.5176	-40.1306	-50.6592	-40.1001	-37.2314	-40.0696	-49.4385	-40.1001	-20.1416	-40.1001	-38.4521	-40.1001	-43.335	-40.1001	-41.5039	-40.1001	-59.8145	-40.1306
0.3005	-18.3105	-40.1001	-18.3105	-40.0696	-26.8555	-40.1306	-23.1934	-40.1001	-28.0762	-40.1001	-46.9971	-40.0696	-57.373	-40.1306	-61.6455	-40.0696	-84.2285	-40.1001	-59.2041	-40.1306	-34.79	-40.1001	-39.0625	-40.0696	-43.9453	-40.0696	-50.0488	-40.0696	-29.2969	-40.1001	-54.9316	-40.1001	-52.4902	-40.0696	-32.959	-40.0696	-51.2695	-40.0696
0.301	-27.4658	-40.1306	-23.8037	-40.1001	2.44141	-40.1306	-25.6348	-40.1001	-23.1934	-40.1001	-51.2695	-40.0696	-68.9697	-40.1306	-83.0078	-40.1001	-81.7871	-40.0696	-68.3594	-40.1001	-42.1143	-40.1001	-34.79	-40.1001	-54.3213	-40.1001	-60.4248	-40.1001	-34.1797	-40.1001	-64.0869	-40.1001	-43.335	-40.0696	-46.3867	-40.0696	-64.6973	-40.0696
0.3015	-12.8174	-40.1306	-17.0898	-40.0696	-14.6484	-40.0696	-11.5967	-40.0391	-18.3105	-40.1001	-38.4521	-40.1306	-42.7246	-40.1001	-97.6563	-40.1001	-76.2939	-40.1001	-70.1904	-40.1001	-29.2969	-40.1001	-42.1143	-40.1001	-50.0488	-40.1001	-46.3867	-40.0696	-43.335	-40.1001	-54.3213	-40.0696	-51.2695	-40.1001	-43.9453	-40.1001	-46.3867	-40.1001
0.302	-12.8174	-40.1001	-29.9072	-40.1001	-21.9727	-40.1001	-22.583	-40.1001	-27.4658	-40.1306	-49.4385	-40.0696	-49.4385	-40.1001	-81.7871	-40.1001	-95.2148	-40.1001	-84.2285	-40.1001	-32.959	-40.1001	-28.6865	-40.1001	-32.3486	-40.1001	-33.5693	-40.1306	-38.4521	-40.1001	-40.8936	-40.1306	-48.2178	-40.1001	-44.5557	-40.1001	-59.2041	-40.1001
0.3025	-10.9863	-40.1306	-23.1934	-40.0696	-10.9863	-40.1001	-8.54492	-40.1001	-15.8691	-40.0696	-32.3486	-40.1001	-46.3867	-40.1001	-84.8389	-40.0696	-85.4492	-40.1001	-85.4492	-40.1001	-34.1797	-40.1306	-29.2969	-40.1001	-36.0107	-40.0696	-43.9453	-40.1306	-46.3867	-40.0696	-46.3867	-40.1001	-42.1143	-40.1001	-38.4521	-40.0696	-61.6455	-40.1001
0.303	-17.7002	-40.1001	-15.8691	-40.0696	-7.93457	-40.1001	-17.0898	-40.1306	-17.0898	-40.0696	-34.1797	-40.1001	-45.7764	-40.1001	-104.98	-40.1001	-76.2939	-40.1001	-78.7354	-40.1001	-36.6211	-40.1001	-39.6729	-40.1001	-37.2314	-40.1306	-57.373	-40.1306	-39.0625	-40.1001	-57.9834	-40.0696	-42.7246	-40.1001	-51.8799	-40.1001	-67.1387	-40.0696
0.3035	-7.32422	-40.1001	-22.583	-40.1001	-1.83105	-40.1001	-29.2969	-40.1001	-7.93457	-40.1306	-32.3486	-40.0696	-30.5176	-40.1001	-106.812	-40.1001	-70.8008	-40.1001	-75.0732	-40.1001	-36.6211	-40.1001	-43.335	-40.1001	-28.6865	-40.1001	-31.1279	-40.1001	-31.7383	-40.1001	-44.5557	-40.0696	-59.8145	-40.0696	-37.2314	-40.1001	-62.2559	-40.1001
0.304	-17.7002	-40.1001	-12.207	-40.1306	-16.4795	-40.1306	-25.0244	-40.1001	-32.959	-40.1001	-36.0107	-40.1001	-17.0898	-40.1001	-100.708	-40.1001	-98.877	-40.1306	-66.5283	-40.1001	-45.7764	-40.1306	-46.3867	-40.1306	-39.6729	-40.0696	-40.8936	-40.1001	-25.6348	-40.1306	-54.3213	-40.1306	-54.3213	-40.1001	-46.3867	-40.1001	-61.0352	-40.1001
0.3045	-15.8691	-40.1001	-21.3623	-40.1306	-17.7002	-40.1001	-24.4141	-40.1001	-20.752	-40.1001	-34.79	-40.1001	-37.2314	-40.1001	-97.0459	-40.1306	-87.2803	-40.0696	-78.125	-40.1001	-39.6729	-40.1001	-53.1006	-40.0696	-29.9072	-40.1001	-37.2314	-40.1001	-45.166	-40.1001	-50.0488	-40.1001	-52.4902	-40.0391	-32.959	-40.1001	-68.3594	-40.0696
0.305	-20.1416	-40.1306	-29.2969	-40.1001	-11.5967	-40.1001	-26.2451	-40.0696	-19.5313	-40.1306	-32.3486	-40.1306	-48.8281	-40.1001	-89.1113	-40.0696	-64.0869	-40.0696	-79.3457	-40.1001	-28.6865	-40.0696	-45.166	-40.1001	-41.5039	-40.1306	-43.9453	-40.1001	-36.0107	-40.1306	-54.9316	-40.1306	-82.3975	-40.1001	-56.7627	-40.1001	-49.4385	-40.1001
0.3055	-22.583	-40.1001	-14.6484	-40.1001	-12.207	-40.1306	-24.4141	-40.1001	-23.1934	-40.1001	-40.2832	-40.0696	-39.6729	-40.1001	-99.4873	-40.1001	-53.1006	-40.0696	-76.9043	-40.1001	-25.6348	-40.0696	-54.9316	-40.1001	-51.2695	-40.0696	-46.3867	-40.1001	-31.7383	-40.1001	-46.3867	-40.1306	-57.9834	-40.1001	-33.5693	-40.0696	-53.1006	-40.0696
0.306	-11.5967	-40.1001	-14.0381	-40.0696	-12.207	-40.0696	-25.0244	-40.1001	-28.0762	-40.1001	-32.959	-40.1001	-38.4521	-40.0696	-111.084	-40.1001	-71.4111	-40.1001	-55.542	-40.1001	-30.5176	-40.0696	-64.6973	-40.0696	-52.4902	-40.1306	-44.5557	-40.1001	-34.1797	-40.1001	-43.9453	-40.1001	-58.5938	-40.1306	-53.7109	-40.1306	-48.2178	-40.0696
0.3065	-6.71387	-40.1001	-27.4658	-40.1001	-6.71387	-40.0696	-24.4141	-40.0696	-18.3105	-40.1001	-21.9727	-40.0696	-35.4004	-40.0696	-111.694	-40.1001	-70.8008	-40.1001	-59.2041	-40.1001	-36.0107	-40.1001	-43.9453	-40.1001	-50.0488	-40.0696	-18.3105	-40.1001	-47.6074	-40.1001	-43.9453	-40.1001	-56.1523	-40.0696	-45.166	-40.1001	-45.7764	-40.1001
0.307	-25.0244	-40.1306	-20.1416	-40.1001	-9.76563	-40.1001	-17.0898	-40.1306	-25.0244	-40.1001	-38.4521	-40.1001	-45.166	-40.1001	-86.6699	-40.1306	-50.6592	-40.1001	-60.4248	-40.1001	-26.2451	-40.1001	-46.9971	-40.0696	-50.0488	-40.1001	-40.2832	-40.1001	-42.1143	-40.1001	-46.9971	-40.1001	-48.8281	-40.1001	-42.7246	-40.1001	-52.4902	-40.1001
0.3075	-21.9727	-40.0696	-18.3105	-40.1001	-3.66211	-40.0696	-21.3623	-40.1306	-30.5176	-40.1001	-29.2969	-40.1001	-45.7764	-40.0696	-99.4873	-40.1001	-76.2939	-40.1001	-79.3457	-40.1306	-25.0244	-40.1001	-55.542	-40.1001	-52.4902	-40.1001	-40.2832	-40.1001	-35.4004	-40.1001	-35.4004	-40.1001	-70.1904	-40.1001	-41.5039	-40.1001	-43.335	-40.1001
0.308	-25.0244	-40.1306	-14.0381	-40.1306	-14.0381	-40.1001	-32.3486	-40.1001	-20.752	-40.1001	-42.1143	-40.1306	-32.3486	-40.1001	-95.8252	-40.1001	-59.2041	-40.1306	-53.1006	-40.1001	-37.2314	-40.1001	-51.2695	-40.1001	-51.8799	-40.1306	-30.5176	-40.1001	-34.79	-40.1001	-40.8936	-40.1001	-36.6211	-40.1001	-37.8418	-40.0696	-45.7764	-40.1001
0.3085	-26.2451	-40.1001	-31.7383	-40.1001	-0.610352	-40.1306	-14.6484	-40.0696	-25.6348	-40.1306	-28.0762	-40.1001	-35.4004	-40.1001	-72.6318	-40.1306	-79.9561	-40.0696	-56.1523	-40.1001	-37.8418	-40.1001	-50.0488	-40.1001	-46.3867	-40.0696	-30.5176	-40.0696	-37.2314	-40.1001	-29.2969	-40.1306	-47.6074	-40.0696	-45.7764	-40.0696	-55.542	-40.1001
0.309	-28.0762	-40.1306	-25.6348	-40.0696	-13.4277	-40.0696	-25.0244	-40.1001	-22.583	-40.1001	-42.7246	-40.0696	-27.4658	-40.1001	-84.2285	-40.1306	-76.9043	-40.1001	-80.5664	-40.1001	-26.8555	-40.0696	-48.8281	-40.1306	-39.6729	-40.1306	-23.8037	-40.1001	-46.3867	-40.1001	-35.4004	-40.1001	-36.6211	-40.1001	-45.7764	-40.0696	-36.6211	-40.1001
0.3095	-21.9727	-40.0696	-12.207	-40.1001	-20.1416	-40.1001	-10.376	-40.1001	-10.376	-40.1306	-51.8799	-40.1306	-37.2314	-40.1001	-98.2666	-40.1001	-68.9697	-40.1306	-80.5664	-40.1001	-28.0762	-40.0696	-57.373	-40.1001	-54.9316	-40.1001	-30.5176	-40.1306	-37.8418	-40.1306	-54.3213	-40.1001	-41.5039	-40.1306	-48.2178	-40.1306	-57.9834	-40.1001
0.31	-28.0762	-40.1001	-27.4658	-40.1001	-2.44141	-40.1001	-20.752	-40.0696	-12.8174	-40.1001	-42.7246	-40.0696	-32.3486	-40.1001	-74.4629	-40.1306	-56.7627	-40.0696	-75.6836	-40.0696	-28.6865	-40.1001	-42.7246	-40.1001	-35.4004	-40.0696	-29.9072	-40.0696	-42.7246	-40.0696	-48.8281	-40.1001	-33.5693	-40.1001	-46.3867	-40.1001	-59.8145	-40.0696
0.3105	-28.0762	-40.0696	-17.7002	-40.1306	-4.88281	-40.1001	-31.1279	-40.1001	-12.8174	-40.1001	-42.1143	-40.1001	-51.2695	-40.0696	-53.1006	-40.1001	-65.918	-40.1306	-76.2939	-40.1001	-41.5039	-40.1001	-40.2832	-40.1001	-49.4385	-40.0696	-17.7002	-40.1001	-36.0107	-40.1001	-35.4004	-40.0696	-32.959	-40.1306	-38.4521	-40.1001	-48.8281	-40.1001
0.311	-24.4141	-40.1001	-26.2451	-40.0696	-20.1416	-40.1001	-12.8174	-40.1001	-23.8037	-40.1001	-37.8418	-40.1001	-42.1143	-40.1001	-61.6455	-40.1001	-61.0352	-40.1001	-62.8662	-40.1001	-29.9072	-40.1001	-62.2559	-40.1306	-46.3867	-40.1001	-43.335	-40.1001	-32.3486	-40.1001	-51.2695	-40.1306	-39.6729	-40.1306	-37.8418	-40.1306	-63.4766	-40.1001
0.3115	-30.5176	-40.1306	-9.76563	-40.0696	-15.2588	-40.1306	-17.0898	-40.1001	-23.1934	-40.0696	-30.5176	-40.1306	-41.5039	-40.1001	-109.253	-40.1306	-76.9043	-40.1001	-53.7109	-40.1001	-30.5176	-40.1306	-59.2041	-40.0696	-32.3486	-40.1001	-36.6211	-40.0696	-36.0107	-40.1001	-40.8936	-40.1001	-37.8418	-40.1001	-45.7764	-40.1001	-45.7764	-40.0696
0.312	-19.5313	-40.1306	-20.752	-40.1001	-10.376	-40.0696	-16.4795	-40.0696	-24.4141	-40.0696	-53.7109	-40.1001	-55.542	-40.1001	-87.2803	-40.1001	-43.9453	-40.1001	-68.9697	-40.1001	-23.1934	-40.1001	-58.5938	-40.1001	-46.3867	-40.1001	-36.0107	-40.1001	-36.6211	-40.1306	-40.8936	-40.0696	-40.8936	-40.1001	-50.0488	-40.0696	-37.8418	-40.1001
0.3125	-30.5176	-40.0696	-14.0381	-40.0696	-21.9727	-40.0696	-28.0762	-40.1001	-24.4141	-40.1306	-37.2314	-40.1001	-36.6211	-40.1001	-65.3076	-40.1001	-42.7246	-40.1001	-88.501	-40.1306	-36.6211	-40.1001	-53.1006	-40.1001	-42.7246	-40.1001	-36.6211	-40.1306	-33.5693	-40.1306	-40.2832	-40.1306	-45.7764	-40.1306	-38.4521	-40.1001	-43.335	-40.0696
0.313	-21.3623	-40.0696	-34.79	-40.1306	-20.752	-40.1001	-23.8037	-40.1306	-15.8691	-40.1001	-40.8936	-40.1306	-51.8799	-40.0696	-73.8525	-40.1001	-64.6973	-40.0696	-73.8525	-40.1001	-42.7246	-40.1001	-50.6592	-40.1001	-40.8936	-40.1306	-31.7383	-40.1001	-24.4141	-40.1001	-36.6211	-40.1001	-26.2451	-40.1306	-37.8418	-40.1001	-46.9971	-40.1306
0.3135	-28.0762	-40.1306	-15.8691	-40.0696	-9.76563	-40.1001	-20.752	-40.0696	-12.8174	-40.1001	-60.4248	-40.1001	-48.2178	-40.1001	-78.125	-40.1001	-45.7764	-40.1001	-79.9561	-40.1001	-24.4141	-40.1001	-41.5039	-40.1306	-48.2178	-40.1001	-23.8037	-40.1001	-40.8936	-40.1001	-46.9971	-40.1001	-40.8936	-40.1001	-42.1143	-40.1001	-42.7246	-40.1001
0.314	-17.7002	-40.0696	-27.4658	-40.1306	-6.10352	-40.0696	-26.2451	-40.0696	-24.4141	-40.1001	-41.5039	-40.0391	-54.9316	-40.1001	-101.318	-40.1001	-69.5801	-40.1001	-63.4766	-40.1001	-25.0244	-40.1306	-45.166	-40.1001	-37.2314	-40.1001	-41.5039	-40.1306	-33.5693	-40.0696	-61.6455	-40.1001	-37.8418	-40.1001	-37.8418	-40.1001	-53.1006	-40.1306
0.3145	-20.752	-40.1001	-18.3105	-40.1001	-12.207	-40.1001	-19.5313	-40.1001	-12.8174	-40.1001	-40.2832	-40.1001	-37.8418	-40.0696	-95.8252	-40.0696	-46.9971	-40.1306	-76.9043	-40.1306	-17.7002	-40.1001	-59.2041	-40.0696	-48.2178	-40.0696	-42.1143	-40.1001	-32.959	-40.1001	-56.1523	-40.0696	-23.8037	-40.1001	-42.1143	-40.1001	-48.2178	-40.1001
0.315	-26.8555	-40.1001	-19.5313	-40.0696	-23.1934	-40.1001	-29.2969	-40.1001	-25.0244	-40.0696	-31.7383	-40.1001	-35.4004	-40.1001	-95.2148	-40.1001	-54.9316	-40.1001	-74.4629	-40.1001	-29.2969	-40.1306	-49.4385	-40.1001	-38.4521	-40.1001	-32.959	-40.1306	-29.9072	-40.0696	-54.3213	-40.0696	-29.2969	-40.1001	-45.166	-40.1001	-45.7764	-40.1306
0.3155	-15.2588	-40.0696	-27.4658	-40.1306	-1.83105	-40.1001	-21.3623	-40.1001	-8.54492	-40.1001	-29.2969	-40.1001	-45.7764	-40.1001	-86.0596	-40.1001	-61.0352	-40.1001	-61.6455	-40.1001	-43.335	-40.1001	-43.335	-40.1001	-51.8799	-40.1001	-44.5557	-40.1306	-38.4521	-40.1001	-43.335	-40.1001	-21.3623	-40.1306	-45.166	-40.1001	-39.6729	-40.1001
0.316	-26.2451	-40.1306	-21.3623	-40.1306	-1.2207	-40.1306	-34.1797	-40.0696	-9.76563	-40.1001	-36.0107	-40.1306	-33.5693	-40.1001	-100.098	-40.0696	-32.3486	-40.1001	-68.3594	-40.1306	-21.3623	-40.1306	-59.2041	-40.0696	-34.79	-40.1001	-40.2832	-40.1001	-50.0488	-40.1001	-39.0625	-40.1001	-28.6865	-40.1001	-53.7109	-40.0696	-47.6074	-40.1001
0.3165	-33.5693	-40.1001	-15.2588	-40.1001	3.66211	-40.1001	-17.7002	-40.1001	-14.6484	-40.1001	-33.5693	-40.1001	-51.8799	-40.0696	-86.0596	-40.1001	-66.5283	-40.1306	-53.1006	-40.1306	-34.79	-40.1001	-59.2041	-40.1306	-36.6211	-40.1001	-46.3867	-40.1306	-37.8418	-40.1001	-60.4248	-40.1001	-29.9072	-40.1001	-34.1797	-40.1001	-59.8145	-40.1001
0.317	-26.8555	-40.1306	-15.2588	-40.1001	-4.27246	-40.1001	-18.9209	-40.1001	-15.2588	-40.1001	-30.5176	-40.1001	-39.0625	-40.1306	-103.76	-40.1001	-55.542	-40.1001	-68.9697	-40.1001	-22.583	-40.1001	-43.9453	-40.0696	-42.1143	-40.1001	-44.5557	-40.1001	-30.5176	-40.1001	-34.1797	-40.1001	-37.8418	-40.1001	-40.8936	-40.1001	-51.2695	-40.1001
0.3175	-6.71387	-40.1001	-4.27246	-40.0696	-3.05176	-40.1001	-24.4141	-40.0391	-7.93457	-40.1001	-42.7246	-40.1001	-54.3213	-40.1306	-109.863	-40.1001	-57.373	-40.1306	-76.9043	-40.0696	-33.5693	-40.1001	-48.2178	-40.0696	-42.7246	-40.1001	-49.4385	-40.1001	-44.5557	-40.1001	-29.9072	-40.1001	-42.7246	-40.0696	-38.4521	-40.1001	-51.8799	-40.1306
0.318	-25.0244	-40.1306	-15.2588	-40.0696	1.2207	-40.1001	-21.3623	-40.1001	-11.5967	-40.1001	-29.2969	-40.0696	-42.1143	-40.1001	-112.915	-40.1001	-67.1387	-40.0696	-91.5527	-40.1306	-32.959	-40.0696	-38.4521	-40.1001	-42.7246	-40.1001	-38.4521	-40.1001	-44.5557	-40.1001	-36.6211	-40.0696	-40.8936	-40.1001	-35.4004	-40.1001	-61.6455	-40.1001
0.3185	-21.3623	-40.0696	-25.6348	-40.1001	-6.10352	-40.1001	-30.5176	-40.1001	-26.8555	-40.1001	-23.1934	-40.0696	-31.7383	-40.1306	-108.643	-40.0696	-54.9316	-40.1001	-94.6045	-40.1001	-25.0244	-40.1001	-51.2695	-40.1001	-53.1006	-40.1001	-42.1143	-40.1001	-45.166	-40.1001	-40.2832	-40.1001	-23.1934	-40.1001	-57.9834	-40.1306	-61.0352	-40.1001
0.319	-17.0898	-40.1001	-24.4141	-40.1306	-18.9209	-40.1001	-26.8555	-40.0696	-23.1934	-40.1001	-28.6865	-40.1306	-28.0762	-40.1001	-104.98	-40.1001	-57.373	-40.1306	-95.8252	-40.1001	-38.4521	-40.1001	-53.7109	-40.1001	-49.4385	-40.0696	-40.2832	-40.1001	-39.0625	-40.0696	-47.6074	-40.1001	-50.0488	-40.1001	-45.166	-40.1001	-51.2695	-40.1001
0.3195	-10.9863	-40.1001	-28.0762	-40.1001	3.05176	-40.1001	-20.1416	-40.1001	-28.0762	-40.1306	-39.0625	-40.1001	-31.1279	-40.0696	-113.525	-40.1306	-54.9316	-40.0696	-112.305	-40.0696	-35.4004	-40.1001	-36.0107	-40.1306	-48.8281	-40.0696	-35.4004	-40.1001	-31.7383	-40.1001	-34.1797	-40.1001	-40.2832	-40.0696	-48.8281	-40.0696	-59.8145	-40.1001
0.32	-21.3623	-40.1001	-10.9863	-40.1001	-13.4277	-40.1001	-17.7002	-40.1001	-18.9209	-40.1001	-33.5693	-40.1306	-39.6729	-40.1001	-120.85	-40.0696	-61.0352	-40.1306	-88.501	-40.1001	-34.79	-40.1001	-54.3213	-40.1306	-44.5557	-40.0696	-52.4902	-40.1306	-32.3486	-40.0696	-39.0625	-40.1001	-43.335	-40.1001	-42.7246	-40.1001	-59.2041	-40.1001
0.3205	-20.1416	-40.0696	-29.9072	-40.1001	-20.752	-40.1001	-8.54492	-40.1001	-5.49316	-40.1001	-31.7383	-40.1001	-48.2178	-40.1001	-98.2666	-40.0696	-56.7627	-40.0696	-58.5938	-40.1001	-28.0762	-40.1001	-45.7764	-40.1001	-39.6729	-40.1001	-30.5176	-40.1001	-29.9072	-40.1001	-50.6592	-40.0696	-42.1143	-40.1001	-39.6729	-40.0696	-61.6455	-40.1001
0.321	-10.376	-40.1306	-19.5313	-40.1001	6.71387	-40.0696	-21.9727	-40.1001	-16.4795	-40.1001	-43.335	-40.1001	-39.0625	-40.1306	-86.6699	-40.1001	-62.8662	-40.0696	-67.1387	-40.1001	-34.1797	-40.1001	-58.5938	-40.0696	-36.6211	-40.1001	-34.79	-40.1306	-20.1416	-40.1001	-42.7246	-40.0696	-40.2832	-40.0696	-39.0625	-40.1001	-52.4902	-40.1001
0.3215	-14.0381	-40.1306	-28.6865	-40.1001	-6.71387	-40.0696	-25.0244	-40.1001	-23.1934	-40.1001	-34.79	-40.0696	-35.4004	-40.1306	-99.4873	-40.1001	-59.2041	-40.1001	-61.0352	-40.1001	-34.79	-40.1306	-51.2695	-40.0696	-43.9453	-40.1001	-40.8936	-40.1001	-30.5176	-40.1001	-33.5693	-40.0696	-33.5693	-40.1001	-43.335	-40.1001	-52.4902	-40.0696
0.322	-22.583	-40.1001	-26.8555	-40.1001	-23.1934	-40.1001	-21.9727	-40.1001	-36.6211	-40.1001	-37.8418	-40.0696	-33.5693	-40.0696	-111.694	-40.1001	-42.7246	-40.1001	-72.0215	-40.1001	-43.9453	-40.0696	-45.166	-40.1001	-39.6729	-40.1001	-36.6211	-40.1001	-47.6074	-40.0696	-36.6211	-40.0696	-46.9971	-40.1001	-32.959	-40.1306	-41.5039	-40.1001
0.3225	-17.0898	-40.1001	-28.6865	-40.1001	-17.7002	-40.1001	-25.0244	-40.1001	-16.4795	-40.1001	-39.0625	-40.1001	-37.8418	-40.1306	-98.2666	-40.0696	-64.6973	-40.1001	-80.5664	-40.1306	-29.2969	-40.1306	-51.8799	-40.0696	-36.6211	-40.0696	-40.2832	-40.1001	-28.6865	-40.0696	-29.2969	-40.1001	-39.6729	-40.0696	-30.5176	-40.1001	-56.7627	-40.1306
0.323	-5.49316	-40.1001	-23.8037	-40.0696	-9.15527	-40.1001	-20.1416	-40.1306	-8.54492	-40.1306	-39.6729	-40.0696	-33.5693	-40.1306	-102.539	-40.1001	-71.4111	-40.0696	-76.9043	-40.1306	-27.4658	-40.1001	-63.4766	-40.1001	-35.4004	-40.0696	-42.1143	-40.1306	-37.2314	-40.1306	-42.7246	-40.1306	-54.3213	-40.1001	-35.4004	-40.1001	-56.7627	-40.1001
0.3235	-13.4277	-40.0696	-30.5176	-40.1306	-1.2207	-40.1001	-20.752	-40.1611	-20.752	-40.1001	-29.2969	-40.0696	-37.8418	-40.0696	-79.9561	-40.1001	-44.5557	-40.0696	-79.9561	-40.1001	-39.0625	-40.1001	-72.6318	-40.0696	-40.2832	-40.1001	-51.2695	-40.0696	-51.8799	-40.1001	-40.2832	-40.1001	-43.9453	-40.1306	-42.7246	-40.0696	-46.3867	-40.1001
0.324	-15.8691	-40.1001	-19.5313	-40.1001	-21.3623	-40.1001	-21.9727	-40.1001	-17.7002	-40.1001	-34.1797	-40.0696	-41.5039	-40.1001	-83.6182	-40.1001	-35.4004	-40.1001	-78.7354	-40.1001	-38.4521	-40.1001	-53.7109	-40.1001	-30.5176	-40.0696	-31.7383	-40.1306	-47.6074	-40.1001	-40.2832	-40.1001	-41.5039	-40.0696	-32.3486	-40.1306	-57.373	-40.1001
0.3245	2.44141	-40.1001	-21.9727	-40.1001	-12.8174	-40.1001	-29.9072	-40.0696	-14.6484	-40.1001	-36.0107	-40.1001	-31.7383	-40.1306	-75.6836	-40.1306	-49.4385	-40.1001	-75.0732	-40.0696	-40.2832	-40.1001	-61.6455	-40.1001	-45.166	-40.0696	-41.5039	-40.1001	-43.335	-40.1306	-40.2832	-40.1306	-36.0107	-40.1001	-40.8936	-40.0696	-56.7627	-40.1306
0.325	-5.49316	-40.1001	-29.2969	-40.1001	-7.32422	-40.1001	-24.4141	-40.1001	-23.8037	-40.0696	-46.3867	-40.1001	-42.1143	-40.1001	-78.7354	-40.1001	-61.0352	-40.0696	-75.0732	-40.1001	-34.79	-40.0696	-61.6455	-40.1001	-36.6211	-40.1001	-41.5039	-40.1001	-36.6211	-40.1001	-36.6211	-40.1306	-42.1143	-40.0696	-32.959	-40.0696	-41.5039	-40.1001
0.3255	-31.7383	-40.1001	-20.752	-40.1001	-3.66211	-40.1001	-15.8691	-40.0696	-19.5313	-40.1001	-27.4658	-40.1001	-50.6592	-40.0696	-92.1631	-40.1001	-51.2695	-40.0696	-72.6318	-40.1001	-30.5176	-40.0696	-48.2178	-40.0696	-37.2314	-40.1001	-32.959	-40.1001	-48.2178	-40.1001	-43.9453	-40.1001	-31.1279	-40.1001	-37.8418	-40.1306	-55.542	-40.1001
0.326	-12.8174	-40.1001	-18.3105	-40.0696	-13.4277	-40.1001	-14.0381	-40.1001	-28.6865	-40.1001	-43.9453	-40.0696	-54.3213	-40.1001	-106.812	-40.1001	-58.5938	-40.1001	-65.3076	-40.1001	-33.5693	-40.1001	-54.3213	-40.1001	-36.0107	-40.0696	-46.3867	-40.1001	-54.3213	-40.1001	-44.5557	-40.1001	-40.2832	-40.1001	-49.4385	-40.1001	-50.6592	-40.0696
0.3265	-9.76563	-40.1001	-20.1416	-40.1001	-20.1416	-40.1001	-20.1416	-40.1001	-32.3486	-40.1001	-33.5693	-40.1001	-46.9971	-40.1001	-101.318	-40.1001	-53.7109	-40.1001	-85.4492	-40.1306	-39.0625	-40.1306	-60.4248	-40.1306	-43.9453	-40.1001	-43.9453	-40.1001	-56.1523	-40.0696	-39.0625	-40.0696	-50.6592	-40.1001	-39.0625	-40.0696	-53.1006	-40.0696
0.327	-19.5313	-40.1001	-15.2588	-40.0696	-15.8691	-40.1001	-14.0381	-40.0696	-19.5313	-40.0696	-43.335	-40.0696	-51.8799	-40.0696	-93.3838	-40.1001	-63.4766	-40.1001	-64.6973	-40.0696	-21.3623	-40.0696	-51.2695	-40.1001	-41.5039	-40.1306	-30.5176	-40.1001	-38.4521	-40.0696	-46.9971	-40.0696	-34.79	-40.0696	-30.5176	-40.1001	-56.1523	-40.1001
0.3275	-22.583	-40.1306	-12.207	-40.1001	-6.10352	-40.1001	-21.9727	-40.1001	-14.0381	-40.1001	-35.4004	-40.1001	-28.0762	-40.0696	-101.318	-40.1001	-57.9834	-40.1306	-67.1387	-40.1306	-32.959	-40.0696	-51.8799	-40.1001	-42.7246	-40.0696	-42.1143	-40.1001	-39.0625	-40.1001	-34.1797	-40.1001	-48.2178	-40.0696	-48.2178	-40.1001	-37.2314	-40.0696
0.328	-16.4795	-40.1001	-25.6348	-40.1306	-17.7002	-40.1001	-17.0898	-40.1001	-18.3105	-40.1001	-25.6348	-40.1001	-29.9072	-40.1001	-103.76	-40.1001	-56.7627	-40.1001	-75.0732	-40.1306	-46.3867	-40.1001	-53.1006	-40.1001	-37.8418	-40.0696	-33.5693	-40.1001	-33.5693	-40.1001	-34.1797	-40.1001	-42.1143	-40.0696	-40.2832	-40.1001	-45.7764	-40.0696
0.3285	-20.752	-40.0696	-14.0381	-40.1001	-17.0898	-40.1306	-3.66211	-40.1001	-14.6484	-40.0696	-24.4141	-40.1001	-39.0625	-40.1001	-98.877	-40.1001	-72.0215	-40.0696	-79.3457	-40.1001	-39.0625	-40.0696	-45.7764	-40.1001	-40.2832	-40.1306	-21.9727	-40.1306	-44.5557	-40.1001	-50.0488	-40.1001	-49.4385	-40.0696	-43.335	-40.1001	-28.0762	-40.1001
0.329	-11.5967	-40.1001	-15.2588	-40.1001	-14.0381	-40.1001	-21.9727	-40.0391	-7.32422	-40.1001	-40.2832	-40.1001	-48.8281	-40.1001	-103.149	-40.1306	-79.9561	-40.0696	-89.7217	-40.0696	-37.2314	-40.0696	-43.335	-40.1001	-56.7627	-40.1306	-39.6729	-40.1001	-37.8418	-40.1306	-32.3486	-40.1306	-37.2314	-40.1001	-39.6729	-40.1001	-50.0488	-40.1001
0.3295	-12.8174	-40.1001	-31.7383	-40.0696	-0.610352	-40.1001	-5.49316	-40.1001	-19.5313	-40.0696	-34.1797	-40.1001	-33.5693	-40.1306	-91.5527	-40.1306	-74.4629	-40.0696	-81.7871	-40.1001	-36.6211	-40.1001	-48.8281	-40.0696	-55.542	-40.1001	-32.3486	-40.0696	-42.7246	-40.1001	-42.7246	-40.1306	-42.7246	-40.0696	-44.5557	-40.1001	-53.1006	-40.1001
0.33	-23.1934	-40.1001	-10.376	-40.1001	-10.9863	-40.1001	-17.0898	-40.1001	-23.1934	-40.0696	-44.5557	-40.1001	-23.8037	-40.1001	-93.3838	-40.1001	-81.1768	-40.1001	-72.6318	-40.1001	-52.4902	-40.1001	-46.3867	-40.0696	-36.6211	-40.1001	-40.2832	-40.0696	-41.5039	-40.1001	-34.1797	-40.1001	-46.3867	-40.1001	-40.2832	-40.1001	-48.8281	-40.1001
0.3305	-23.8037	-40.1001	-19.5313	-40.0696	-9.15527	-40.1001	-26.8555	-40.1001	-9.15527	-40.1001	-36.6211	-40.0696	-30.5176	-40.1001	-97.0459	-40.1001	-79.3457	-40.1001	-61.0352	-40.1001	-45.7764	-40.1306	-54.3213	-40.1001	-37.2314	-40.1001	-29.9072	-40.0696	-34.79	-40.1001	-36.6211	-40.1306	-37.2314	-40.1001	-43.335	-40.1306	-43.335	-40.1001
0.331	-19.5313	-40.1306	-23.8037	-40.1306	-6.10352	-40.1001	-25.0244	-40.1001	-18.9209	-40.0696	-42.7246	-40.1001	-37.2314	-40.0696	-104.37	-40.1306	-79.9561	-40.1001	-75.0732	-40.1001	-42.1143	-40.1001	-57.373	-40.1306	-56.7627	-40.1001	-32.959	-40.1001	-32.959	-40.1001	-47.6074	-40.1306	-40.2832	-40.0696	-45.166	-40.1001	-42.7246	-40.1001
0.3315	-27.4658	-40.0696	-28.0762	-40.1306	0	-40.1001	-23.1934	-40.1001	-10.9863	-40.1001	-34.79	-40.1306	-24.4141	-40.0696	-82.3975	-40.1001	-64.6973	-40.1001	-75.6836	-40.1306	-40.8936	-40.1306	-46.9971	-40.1306	-46.3867	-40.0696	-24.4141	-40.1001	-39.0625	-40.1001	-49.4385	-40.1001	-48.8281	-40.0696	-32.3486	-40.0696	-40.8936	-40.0696
0.332	-25.0244	-40.0696	-14.6484	-40.1001	-20.1416	-40.1001	-19.5313	-40.1001	-19.5313	-40.1001	-35.4004	-40.1306	-26.8555	-40.1001	-92.1631	-40.1306	-76.9043	-40.0696	-76.2939	-40.1001	-34.1797	-40.1001	-63.4766	-40.1001	-50.0488	-40.1306	-37.2314	-40.1001	-25.6348	-40.1001	-47.6074	-40.1001	-53.7109	-40.0696	-44.5557	-40.1001	-52.4902	-40.0696
0.3325	-26.2451	-40.1001	-33.5693	-40.1001	-0.610352	-40.1001	-20.1416	-40.0696	-26.8555	-40.1001	-36.0107	-40.0696	-36.6211	-40.1001	-108.032	-40.1001	-73.8525	-40.1001	-88.501	-40.1001	-34.79	-40.1001	-51.8799	-40.1306	-51.8799	-40.1001	-35.4004	-40.1001	-36.6211	-40.1306	-39.0625	-40.1001	-49.4385	-40.1001	-44.5557	-40.0696	-57.373	-40.1001
0.333	-17.0898	-40.1001	-23.1934	-40.1001	4.88281	-40.1001	-22.583	-40.0696	-24.4141	-40.1001	-51.2695	-40.1306	-40.8936	-40.0391	-87.8906	-40.0696	-72.0215	-40.1001	-78.7354	-40.1001	-51.2695	-40.1001	-65.3076	-40.1001	-40.2832	-40.1001	-30.5176	-40.1001	-31.1279	-40.1306	-42.7246	-40.1306	-38.4521	-40.0696	-39.0625	-40.1001	-61.6455	-40.0696
0.3335	-31.1279	-40.1001	-28.0762	-40.1001	-14.0381	-40.1001	-21.3623	-40.0696	-20.752	-40.1001	-36.6211	-40.1306	-37.8418	-40.1611	-87.8906	-40.1001	-77.5146	-40.1001	-70.8008	-40.0696	-44.5557	-40.0696	-57.373	-40.1001	-49.4385	-40.1001	-23.1934	-40.1001	-32.3486	-40.0696	-48.2178	-40.1001	-39.6729	-40.1001	-46.9971	-40.1001	-52.4902	-40.1001
0.334	-18.9209	-40.1001	-27.4658	-40.1306	-18.3105	-40.1001	-20.752	-40.1001	-15.8691	-40.1001	-32.3486	-40.1001	-25.0244	-40.1306	-78.7354	-40.0696	-78.7354	-40.0696	-76.2939	-40.1001	-44.5557	-40.0696	-54.3213	-40.1001	-44.5557	-40.1001	-42.1143	-40.1306	-44.5557	-40.1001	-43.9453	-40.0696	-37.8418	-40.1306	-32.3486	-40.1001	-74.4629	-40.1001
0.3345	-37.2314	-40.0696	-14.6484	-40.1001	-1.83105	-40.0696	-17.7002	-40.1001	-18.3105	-40.1001	-30.5176	-40.1306	-26.8555	-40.1001	-92.7734	-40.1001	-73.8525	-40.1001	-75.6836	-40.1001	-29.9072	-40.1306	-55.542	-40.1306	-47.6074	-40.1001	-32.959	-40.1611	-25.6348	-40.1001	-45.7764	-40.0696	-46.9971	-40.1001	-39.0625	-40.1001	-57.373	-40.1001
0.335	-29.9072	-40.1001	-29.9072	-40.1306	-1.83105	-40.1306	-25.6348	-40.1001	-31.7383	-40.1001	-42.1143	-40.1306	-31.1279	-40.1001	-98.877	-40.1001	-53.1006	-40.0696	-67.1387	-40.1001	-32.3486	-40.1001	-40.2832	-40.0696	-53.7109	-40.1001	-46.9971	-40.0696	-38.4521	-40.1001	-43.335	-40.1001	-29.9072	-40.1001	-48.2178	-40.1306	-50.0488	-40.1306
0.3355	-18.3105	-40.1001	-36.0107	-40.1001	-19.5313	-40.1001	1.83105	-40.1306	-23.1934	-40.0696	-37.2314	-40.1306	-32.3486	-40.1306	-93.9941	-40.1306	-52.4902	-40.1306	-68.3594	-40.0696	-39.0625	-40.1306	-31.7383	-40.1001	-47.6074	-40.1001	-42.7246	-40.1001	-31.1279	-40.1001	-48.2178	-40.1001	-46.9971	-40.1001	-37.2314	-40.0696	-49.4385	-40.1306
0.336	-17.7002	-40.1001	-28.0762	-40.1001	3.05176	-40.1001	-19.5313	-40.1306	-23.1934	-40.1001	-50.0488	-40.1001	-25.0244	-40.1001	-97.0459	-40.1001	-58.5938	-40.0696	-83.0078	-40.1001	-34.1797	-40.1001	-48.8281	-40.1306	-48.2178	-40.1001	-37.8418	-40.1306	-28.0762	-40.1001	-47.6074	-40.1001	-43.335	-40.0696	-43.9453	-40.1001	-50.6592	-40.0696
0.3365	-31.1279	-40.1001	-28.6865	-40.1001	0.610352	-40.1001	-15.8691	-40.1001	-22.583	-40.1001	-39.0625	-40.1001	-23.1934	-40.1001	-80.5664	-40.0696	-44.5557	-40.1001	-71.4111	-40.1001	-37.8418	-40.1001	-33.5693	-40.0696	-48.2178	-40.1001	-62.2559	-40.1001	-42.1143	-40.0696	-54.9316	-40.1001	-37.2314	-40.1001	-46.3867	-40.1306	-46.9971	-40.1001
0.337	-21.9727	-40.1001	-33.5693	-40.0696	0	-40.1001	-28.0762	-40.1001	-20.752	-40.0696	-34.79	-40.0696	-35.4004	-40.1306	-88.501	-40.1001	-68.3594	-40.1001	-83.0078	-40.0696	-42.7246	-40.1306	-42.1143	-40.1001	-43.9453	-40.0696	-42.7246	-40.0696	-32.3486	-40.1306	-52.4902	-40.0696	-38.4521	-40.1306	-49.4385	-40.0696	-34.1797	-40.1306
0.3375	-9.76563	-40.0696	-28.6865	-40.1001	-6.71387	-40.0696	-12.207	-40.1001	-30.5176	-40.1306	-25.0244	-40.1001	-34.1797	-40.1001	-92.7734	-40.1001	-62.2559	-40.1001	-66.5283	-40.1306	-35.4004	-40.1001	-48.2178	-40.1001	-43.9453	-40.1306	-40.2832	-40.1001	-35.4004	-40.1001	-39.6729	-40.1001	-58.5938	-40.0696	-34.1797	-40.0696	-49.4385	-40.0696
0.338	-22.583	-40.0696	-26.8555	-40.1001	-10.9863	-40.0696	-8.54492	-40.1001	-29.2969	-40.1001	-31.1279	-40.1001	-49.4385	-40.1001	-97.6563	-40.0696	-50.6592	-40.1001	-62.8662	-40.0696	-38.4521	-40.1306	-43.335	-40.1001	-37.2314	-40.1001	-38.4521	-40.1001	-34.1797	-40.1001	-43.9453	-40.0696	-43.335	-40.1306	-36.6211	-40.1306	-37.8418	-40.1001
0.3385	-15.2588	-40.1001	-17.0898	-40.1001	-7.32422	-40.1001	-20.1416	-40.1001	-31.1279	-40.1001	-39.6729	-40.0696	-24.4141	-40.0696	-90.332	-40.1001	-65.3076	-40.0391	-95.8252	-40.1001	-18.9209	-40.1306	-51.8799	-40.1001	-46.3867	-40.0696	-35.4004	-40.1001	-32.3486	-40.1001	-61.0352	-40.1001	-38.4521	-40.1001	-49.4385	-40.1306	-44.5557	-40.1001
0.339	-21.9727	-40.1001	-5.49316	-40.0696	-3.66211	-40.0696	-22.583	-40.0696	-32.3486	-40.0696	-15.8691	-40.1001	-42.1143	-40.1001	-117.798	-40.1001	-70.8008	-40.1306	-60.4248	-40.1001	-28.0762	-40.1001	-48.2178	-40.1001	-31.7383	-40.0696	-36.0107	-40.1001	-34.79	-40.0696	-54.9316	-40.1001	-57.9834	-40.1001	-34.79	-40.1001	-52.4902	-40.1001
0.3395	-15.8691	-40.0696	-14.0381	-40.1306	-7.32422	-40.1001	-25.0244	-40.1001	-36.6211	-40.1001	-17.7002	-40.1001	-18.3105	-40.0696	-109.863	-40.1001	-40.2832	-40.1001	-80.5664	-40.0696	-37.8418	-40.1001	-57.373	-40.1001	-41.5039	-40.1001	-41.5039	-40.0696	-40.8936	-40.1001	-42.7246	-40.0696	-42.1143	-40.1001	-29.9072	-40.1001	-43.335	-40.1001
0.34	-18.3105	-40.1001	-35.4004	-40.1001	-7.93457	-40.1611	-27.4658	-40.1001	-6.71387	-40.1001	-28.0762	-40.1001	-27.4658	-40.1001	-91.5527	-40.1001	-62.2559	-40.1001	-76.9043	-40.1001	-29.2969	-40.1001	-54.3213	-40.1001	-35.4004	-40.1306	-42.1143	-40.1001	-30.5176	-40.1001	-47.6074	-40.1001	-59.2041	-40.1001	-41.5039	-40.1001	-45.166	-40.1306
0.3405	-14.6484	-40.1001	-19.5313	-40.1001	-15.8691	-40.1001	-12.8174	-40.1001	-12.8174	-40.1306	-27.4658	-40.0696	-48.8281	-40.1001	-98.877	-40.0696	-62.8662	-40.0696	-68.9697	-40.1306	-43.9453	-40.1001	-53.1006	-40.1001	-46.9971	-40.1001	-45.7764	-40.1306	-31.7383	-40.1001	-59.2041	-40.1001	-45.7764	-40.1001	-28.6865	-40.1001	-42.1143	-40.0696
0.341	-3.05176	-40.1001	-38.4521	-40.1001	-9.15527	-40.1001	-14.6484	-40.0696	-30.5176	-40.1001	-22.583	-40.1001	-40.8936	-40.1001	-125.122	-40.0696	-46.9971	-40.1001	-72.6318	-40.1001	-36.6211	-40.0696	-48.8281	-40.1001	-39.0625	-40.1001	-40.8936	-40.1001	-36.0107	-40.1001	-48.2178	-40.1001	-43.335	-40.0696	-34.79	-40.1001	-40.8936	-40.1001
0.3415	-16.4795	-40.1001	-25.0244	-40.1001	-18.9209	-40.0696	-7.93457	-40.0696	-15.2588	-40.1001	-20.752	-40.0696	-43.335	-40.1001	-106.201	-40.1001	-42.7246	-40.0696	-59.8145	-40.1306	-41.5039	-40.1001	-58.5938	-40.1001	-44.5557	-40.0696	-38.4521	-40.1001	-33.5693	-40.0696	-39.6729	-40.1001	-45.7764	-40.1306	-35.4004	-40.0696	-46.9971	-40.1001
0.342	-22.583	-40.1001	-31.1279	-40.1001	-26.8555	-40.1001	-34.1797	-40.1306	-18.3105	-40.0696	-27.4658	-40.0696	-26.2451	-40.1306	-105.591	-40.1001	-50.6592	-40.1001	-86.6699	-40.1001	-33.5693	-40.1306	-33.5693	-40.1001	-51.8799	-40.1001	-34.1797	-40.1001	-43.9453	-40.0696	-50.0488	-40.0696	-46.3867	-40.1306	-45.166	-40.0696	-48.8281	-40.1001
0.3425	-18.9209	-40.1001	-25.0244	-40.1306	-7.93457	-40.1001	-20.752	-40.1001	-14.6484	-40.1001	-18.9209	-40.0696	-32.959	-40.1001	-101.318	-40.1001	-61.0352	-40.1001	-66.5283	-40.0696	-20.752	-40.1001	-50.6592	-40.0696	-37.2314	-40.1001	-44.5557	-40.1001	-37.2314	-40.1001	-43.335	-40.0696	-59.2041	-40.0696	-26.8555	-40.1306	-26.8555	-40.1306
0.343	-20.1416	-40.0696	-6.71387	-40.1001	-10.9863	-40.1001	-18.9209	-40.1306	-14.0381	-40.1001	-19.5313	-40.0696	-30.5176	-40.1001	-90.9424	-40.1001	-48.8281	-40.1306	-76.9043	-40.1001	-39.6729	-40.1001	-56.1523	-40.1306	-40.8936	-40.0696	-31.1279	-40.1001	-29.2969	-40.1001	-46.9971	-40.1001	-53.1006	-40.1001	-25.0244	-40.1001	-45.7764	-40.1306
0.3435	-14.0381	-40.1001	-21.3623	-40.1001	-7.32422	-40.1306	-17.7002	-40.1306	-19.5313	-40.1001	-27.4658	-40.1001	-36.6211	-40.1001	-94.6045	-40.1001	-43.9453	-40.1001	-60.4248	-40.1001	-34.1797	-40.1306	-40.8936	-40.1611	-42.7246	-40.0696	-36.6211	-40.0696	-40.2832	-40.1001	-45.166	-40.1001	-32.3486	-40.1001	-16.4795	-40.0696	-52.4902	-40.1001
0.344	-20.1416	-40.1001	-20.752	-40.1001	-18.3105	-40.1306	-21.3623	-40.1306	-23.1934	-40.1001	-29.9072	-40.1001	-40.2832	-40.1001	-98.2666	-40.1001	-30.5176	-40.1001	-50.0488	-40.1001	-29.2969	-40.1001	-56.7627	-40.1001	-45.166	-40.1001	-35.4004	-40.1001	-44.5557	-40.0696	-35.4004	-40.1306	-48.2178	-40.0696	-29.2969	-40.1001	-46.3867	-40.1001
0.3445	-17.7002	-40.1001	-13.4277	-40.1001	-11.5967	-40.1306	-26.8555	-40.0696	-21.3623	-40.1001	-28.6865	-40.1001	-31.7383	-40.1001	-104.37	-40.1001	-45.166	-40.1001	-84.8389	-40.1001	-28.0762	-40.0696	-59.8145	-40.1001	-24.4141	-40.0696	-43.9453	-40.1001	-49.4385	-40.1001	-35.4004	-40.1306	-54.3213	-40.1001	-46.3867	-40.1001	-36.6211	-40.1001
0.345	-23.8037	-40.1001	-14.0381	-40.1001	-8.54492	-40.1306	-12.8174	-40.1001	-35.4004	-40.1001	-20.752	-40.1001	-51.2695	-40.1001	-112.305	-40.1001	-36.6211	-40.0696	-64.6973	-40.1001	-29.2969	-40.1001	-54.9316	-40.1306	-28.0762	-40.1001	-33.5693	-40.0696	-42.7246	-40.1306	-46.3867	-40.1001	-65.918	-40.1001	-42.1143	-40.0696	-48.8281	-40.1306
0.3455	-20.752	-40.1001	-17.0898	-40.0696	-10.376	-40.0696	-17.7002	-40.1306	-16.4795	-40.1001	-18.3105	-40.1001	-27.4658	-40.1001	-111.084	-40.1001	-53.7109	-40.0696	-73.8525	-40.0696	-39.0625	-40.0696	-48.2178	-40.1001	-41.5039	-40.1306	-36.0107	-40.1001	-38.4521	-40.1001	-42.7246	-40.1001	-59.2041	-40.1001	-31.7383	-40.1001	-53.1006	-40.1306
0.346	-3.66211	-40.0696	-20.1416	-40.1001	-16.4795	-40.0696	-20.1416	-40.0696	-28.6865	-40.1001	-40.2832	-40.0696	-37.8418	-40.1001	-111.084	-40.1001	-73.8525	-40.1001	-76.2939	-40.0696	-27.4658	-40.1001	-54.3213	-40.1001	-41.5039	-40.1001	-25.0244	-40.1001	-44.5557	-40.1001	-45.7764	-40.1001	-48.8281	-40.1001	-46.9971	-40.1001	-41.5039	-40.1001
0.3465	-20.752	-40.1001	-9.76563	-40.0696	-22.583	-40.1001	-20.752	-40.0696	-23.8037	-40.1001	-26.2451	-40.1001	-27.4658	-40.1001	-71.4111	-40.1001	-72.6318	-40.1001	-62.8662	-40.1306	-28.0762	-40.1001	-40.8936	-40.1001	-48.2178	-40.0696	-24.4141	-40.1001	-47.6074	-40.1001	-31.7383	-40.1001	-57.9834	-40.1001	-39.6729	-40.1001	-56.1523	-40.1001
0.347	-12.8174	-40.0696	-26.8555	-40.1001	-18.3105	-40.0696	-18.9209	-40.1001	-15.2588	-40.1001	-34.1797	-40.1001	-22.583	-40.1001	-51.2695	-40.1001	-70.1904	-40.1001	-46.3867	-40.1001	-29.9072	-40.1001	-67.749	-40.1001	-37.2314	-40.1001	-35.4004	-40.1001	-48.8281	-40.1001	-42.1143	-40.1001	-45.166	-40.1001	-44.5557	-40.1001	-37.2314	-40.1306
0.3475	-18.9209	-40.1306	-27.4658	-40.1306	-7.93457	-40.1001	-20.1416	-40.1306	-18.3105	-40.1306	-25.6348	-40.1001	-44.5557	-40.0696	-68.3594	-40.1001	-61.0352	-40.1001	-55.542	-40.1306	-39.6729	-40.1001	-43.335	-40.1306	-33.5693	-40.1001	-28.6865	-40.0696	-50.0488	-40.0696	-36.0107	-40.0696	-50.0488	-40.1001	-34.79	-40.1001	-56.1523	-40.1001
0.348	-18.3105	-40.1001	-12.8174	-40.1001	-2.44141	-40.1306	-29.9072	-40.0696	-23.1934	-40.1001	-37.2314	-40.1001	-20.752	-40.0696	-67.749	-40.1001	-52.4902	-40.0696	-56.1523	-40.1001	-42.7246	-40.0696	-51.2695	-40.1001	-40.8936	-40.0696	-31.1279	-40.0696	-37.8418	-40.1001	-36.6211	-40.1306	-46.3867	-40.0696	-37.8418	-40.1001	-51.2695	-40.1001
0.3485	-11.5967	-40.1001	-17.7002	-40.1001	-11.5967	-40.1001	-19.5313	-40.1001	-30.5176	-40.1001	-39.0625	-40.1001	-36.0107	-40.0696	-89.1113	-40.1001	-39.0625	-40.1001	-56.1523	-40.1001	-13.4277	-40.1001	-54.3213	-40.1001	-43.335	-40.1001	-31.7383	-40.1306	-37.2314	-40.1001	-45.166	-40.1001	-44.5557	-40.1001	-34.79	-40.1001	-48.2178	-40.1001
0.349	-33.5693	-40.1306	-24.4141	-40.1001	-11.5967	-40.1306	-31.1279	-40.1306	-17.0898	-40.1306	-32.959	-40.1001	-44.5557	-40.1001	-84.2285	-40.1001	-68.3594	-40.1001	-69.5801	-40.1001	-31.1279	-40.1001	-49.4385	-40.1001	-51.8799	-40.1306	-31.7383	-40.1001	-39.6729	-40.1001	-29.9072	-40.1001	-47.6074	-40.1001	-48.8281	-40.1001	-48.2178	-40.0696
0.3495	-20.1416	-40.1001	-10.376	-40.0696	-17.0898	-40.1001	-22.583	-40.1001	-15.8691	-40.1001	-25.6348	-40.0696	-38.4521	-40.1001	-111.694	-40.1001	-62.2559	-40.0696	-48.2178	-40.0696	-38.4521	-40.1001	-40.8936	-40.1001	-48.2178	-40.0696	-36.0107	-40.1001	-39.0625	-40.1306	-40.8936	-40.1306	-48.8281	-40.1001	-40.2832	-40.1001	-51.8799	-40.1001
0.35	-8.54492	-40.1306	-15.8691	-40.1001	-12.207	-40.1001	-19.5313	-40.1001	-7.32422	-40.0696	-37.8418	-40.1001	-39.6729	-40.0696	-109.253	-40.1306	-54.9316	-40.1306	-48.2178	-40.1001	-35.4004	-40.1306	-44.5557	-40.1001	-41.5039	-40.1001	-31.7383	-40.1001	-50.0488	-40.1001	-45.7764	-40.0696	-39.0625	-40.1306	-46.3867	-40.1001	-51.2695	-40.1001
0.3505	-26.8555	-40.1001	-8.54492	-40.1001	-8.54492	-40.1001	-27.4658	-40.1001	-32.959	-40.1001	-32.3486	-40.1306	-21.3623	-40.0696	-94.6045	-40.1001	-61.0352	-40.1001	-40.2832	-40.1001	-32.959	-40.0696	-37.8418	-40.1306	-53.1006	-40.1001	-32.959	-40.0696	-51.2695	-40.1001	-41.5039	-40.1001	-36.6211	-40.1001	-42.7246	-40.1306	-46.9971	-40.0696
0.351	-28.6865	-40.1001	-29.2969	-40.1306	-15.2588	-40.1001	-27.4658	-40.1001	-27.4658	-40.0696	-32.3486	-40.1001	-34.1797	-40.0696	-109.253	-40.1001	-65.918	-40.1001	-45.166	-40.1001	-45.166	-40.1306	-38.4521	-40.1001	-51.2695	-40.0696	-20.1416	-40.1001	-56.1523	-40.1001	-59.8145	-40.1001	-36.0107	-40.1001	-40.2832	-40.0696	-45.166	-40.1001
0.3515	-21.9727	-40.0696	-25.6348	-40.1001	-15.8691	-40.0696	-19.5313	-40.1306	-12.8174	-40.0696	-25.6348	-40.1001	-25.0244	-40.1306	-75.6836	-40.1001	-45.166	-40.1001	-57.9834	-40.1001	-39.6729	-40.1001	-50.0488	-40.1306	-45.7764	-40.0696	-32.3486	-40.1001	-34.1797	-40.0696	-52.4902	-40.1001	-42.1143	-40.1001	-42.7246	-40.1001	-58.5938	-40.1001
0.352	-31.1279	-40.1001	-9.15527	-40.1001	-9.76563	-40.1001	-32.3486	-40.1306	-16.4795	-40.1001	-36.0107	-40.1001	-45.7764	-40.1001	-100.098	-40.1306	-59.8145	-40.1001	-61.6455	-40.1001	-40.2832	-40.1001	-41.5039	-40.0696	-51.8799	-40.1001	-36.6211	-40.1306	-33.5693	-40.1001	-42.7246	-40.0696	-44.5557	-40.0696	-38.4521	-40.1001	-54.9316	-40.0696
0.3525	-30.5176	-40.0696	-13.4277	-40.1306	-6.71387	-40.1001	-34.1797	-40.1001	-19.5313	-40.1001	-21.9727	-40.0696	-40.2832	-40.0696	-72.6318	-40.1001	-60.4248	-40.0696	-50.6592	-40.1306	-40.2832	-40.1001	-31.1279	-40.1001	-51.2695	-40.1306	-28.6865	-40.1001	-48.2178	-40.1001	-49.4385	-40.1001	-42.1143	-40.0696	-55.542	-40.1001	-35.4004	-40.1001
0.353	-31.7383	-40.1001	-15.8691	-40.1001	-12.8174	-40.0696	-13.4277	-40.1306	-29.2969	-40.1001	-26.2451	-40.1001	-31.1279	-40.1001	-84.2285	-40.0696	-62.2559	-40.0391	-39.0625	-40.1001	-40.2832	-40.0696	-36.0107	-40.1306	-40.2832	-40.1001	-29.9072	-40.1306	-31.7383	-40.1001	-50.6592	-40.1001	-46.3867	-40.0696	-42.7246	-40.1001	-38.4521	-40.1001
0.3535	-31.1279	-40.1001	-20.1416	-40.0696	-11.5967	-40.1001	-19.5313	-40.1001	-20.1416	-40.1001	-37.2314	-40.1001	-37.8418	-40.1001	-82.3975	-40.1001	-49.4385	-40.0696	-43.9453	-40.1001	-29.2969	-40.1001	-40.8936	-40.1001	-45.7764	-40.1001	-42.7246	-40.1001	-42.7246	-40.1001	-44.5557	-40.1001	-42.1143	-40.1001	-43.9453	-40.1306	-42.1143	-40.0696
0.354	-17.0898	-40.1001	1.83105	-40.1001	1.83105	-40.1001	-32.3486	-40.0696	-24.4141	-40.1001	-23.8037	-40.1001	-32.3486	-40.1001	-85.4492	-40.1001	-55.542	-40.0696	-36.6211	-40.1306	-32.3486	-40.0696	-42.1143	-40.1001	-54.3213	-40.1001	-38.4521	-40.0696	-36.6211	-40.1001	-63.4766	-40.1001	-41.5039	-40.1001	-51.8799	-40.1306	-57.9834	-40.1001
0.3545	-17.0898	-40.1001	-22.583	-40.0696	-9.76563	-40.0696	-19.5313	-40.1306	-16.4795	-40.0696	-24.4141	-40.1001	-29.9072	-40.0696	-95.2148	-40.1306	-67.749	-40.1001	-56.1523	-40.1001	-35.4004	-40.1001	-46.9971	-40.1001	-48.2178	-40.1001	-29.9072	-40.0696	-40.8936	-40.1001	-51.2695	-40.1001	-39.6729	-40.1001	-42.1143	-40.1001	-51.8799	-40.1001
0.355	-28.6865	-40.1001	-17.0898	-40.1001	-6.71387	-40.1001	-22.583	-40.1001	-23.8037	-40.1001	-36.0107	-40.1001	-35.4004	-40.1001	-72.6318	-40.1001	-42.1143	-40.1306	-61.6455	-40.1306	-28.0762	-40.0696	-25.6348	-40.1001	-39.6729	-40.1001	-24.4141	-40.1001	-43.9453	-40.0696	-42.1143	-40.0696	-50.6592	-40.0696	-40.8936	-40.1306	-56.1523	-40.1001
0.3555	-20.752	-40.1001	-16.4795	-40.1001	2.44141	-40.1001	-18.3105	-40.1306	-32.3486	-40.1001	-39.6729	-40.1001	-30.5176	-40.1001	-86.6699	-40.1001	-40.2832	-40.1001	-60.4248	-40.1001	-28.0762	-40.1001	-39.6729	-40.1001	-46.9971	-40.0696	-40.8936	-40.1001	-38.4521	-40.1001	-46.9971	-40.1001	-42.1143	-40.1001	-56.1523	-40.1001	-43.9453	-40.1001
0.356	-22.583	-40.1306	-3.66211	-40.1001	-3.66211	-40.1001	-15.2588	-40.1306	-28.0762	-40.1001	-26.8555	-40.1001	-36.0107	-40.1001	-75.6836	-40.1001	-54.9316	-40.1001	-37.8418	-40.1001	-32.3486	-40.1306	-28.6865	-40.1001	-48.8281	-40.1306	-36.0107	-40.1001	-46.9971	-40.0696	-51.8799	-40.1001	-48.2178	-40.1001	-50.6592	-40.0696	-62.2559	-40.1001
0.3565	-24.4141	-40.1306	-10.9863	-40.1001	-4.88281	-40.1001	-28.0762	-40.0696	-23.8037	-40.0696	-32.959	-40.1306	-25.6348	-40.1306	-100.098	-40.1306	-47.6074	-40.1001	-45.7764	-40.1001	-28.0762	-40.0696	-27.4658	-40.1001	-53.1006	-40.1001	-42.7246	-40.1001	-36.6211	-40.0696	-64.6973	-40.1306	-29.2969	-40.0696	-32.959	-40.1001	-56.7627	-40.0696
0.357	-28.6865	-40.1306	-29.2969	-40.1306	-7.93457	-40.1001	-20.1416	-40.0696	-30.5176	-40.1001	-34.79	-40.1001	-31.7383	-40.1001	-112.915	-40.1306	-41.5039	-40.0696	-33.5693	-40.0696	-42.1143	-40.1001	-59.2041	-40.1001	-46.9971	-40.0696	-40.8936	-40.1001	-37.8418	-40.1001	-55.542	-40.1001	-47.6074	-40.0696	-34.1797	-40.1001	-51.2695	-40.0696
0.3575	-20.1416	-40.1001	-18.9209	-40.1001	-3.66211	-40.0696	-18.9209	-40.0696	-26.8555	-40.1001	-20.1416	-40.0696	-28.0762	-40.1001	-104.37	-40.1001	-53.1006	-40.1001	-51.2695	-40.0391	-40.2832	-40.1306	-52.4902	-40.1306	-47.6074	-40.1001	-37.8418	-40.1001	-48.2178	-40.0696	-63.4766	-40.0696	-38.4521	-40.1001	-39.0625	-40.1001	-45.7764	-40.1306
0.358	-20.1416	-40.0696	-18.3105	-40.1001	12.207	-40.1001	-21.3623	-40.1001	-37.2314	-40.0696	-33.5693	-40.1306	-40.2832	-40.1306	-98.2666	-40.0696	-40.8936	-40.1306	-60.4248	-40.1001	-30.5176	-40.1001	-39.0625	-40.1001	-41.5039	-40.1001	-29.9072	-40.1001	-50.0488	-40.0696	-59.2041	-40.1001	-43.9453	-40.1001	-32.959	-40.0696	-58.5938	-40.1001
0.3585	-18.3105	-40.0696	-10.376	-40.1306	-7.32422	-40.1306	-25.6348	-40.1001	-32.3486	-40.1001	-28.6865	-40.0696	-26.2451	-40.1306	-86.0596	-40.1001	-44.5557	-40.1306	-36.6211	-40.1001	-40.2832	-40.0696	-37.2314	-40.1306	-40.8936	-40.1306	-32.3486	-40.1306	-46.3867	-40.1001	-49.4385	-40.1001	-43.9453	-40.1001	-39.6729	-40.1001	-59.8145	-40.1001
0.359	-22.583	-40.0696	-23.8037	-40.1001	-7.32422	-40.1001	-30.5176	-40.1001	-34.1797	-40.0696	-24.4141	-40.0696	-31.7383	-40.1001	-105.591	-40.1001	-54.9316	-40.1001	-62.8662	-40.1001	-34.1797	-40.1001	-39.6729	-40.1001	-45.166	-40.0696	-50.0488	-40.1001	-39.0625	-40.0696	-56.1523	-40.1001	-46.3867	-40.0696	-51.2695	-40.1001	-56.1523	-40.1001
0.3595	-9.15527	-40.0696	-21.9727	-40.1001	-15.8691	-40.1001	-37.8418	-40.1611	-37.8418	-40.1001	-20.1416	-40.1001	-42.1143	-40.0696	-95.8252	-40.1001	-62.2559	-40.1001	-80.5664	-40.1001	-32.3486	-40.1001	-43.335	-40.1306	-36.6211	-40.1001	-50.0488	-40.1306	-36.6211	-40.0391	-38.4521	-40.1001	-45.7764	-40.1001	-48.8281	-40.1001	-51.2695	-40.0696
0.36	-22.583	-40.1001	-20.752	-40.1001	1.2207	-40.1001	-7.93457	-40.1001	-34.79	-40.1306	-16.4795	-40.1001	-35.4004	-40.0696	-86.6699	-40.1001	-51.8799	-40.1001	-50.0488	-40.1001	-37.8418	-40.0696	-54.3213	-40.1001	-40.2832	-40.1001	-30.5176	-40.1306	-39.6729	-40.0696	-47.6074	-40.0696	-37.2314	-40.0696	-45.166	-40.1306	-48.8281	-40.1001
0.3605	-23.1934	-40.1001	-11.5967	-40.1306	-13.4277	-40.1306	-19.5313	-40.1001	-20.1416	-40.0696	-28.0762	-40.0696	-42.1143	-40.1001	-99.4873	-40.1001	-43.335	-40.1001	-68.9697	-40.1001	-33.5693	-40.1306	-52.4902	-40.1001	-31.1279	-40.0696	-50.0488	-40.1001	-39.0625	-40.1306	-48.2178	-40.1306	-40.2832	-40.1001	-40.8936	-40.1001	-45.7764	-40.1001
0.361	-14.0381	-40.1001	-16.4795	-40.1001	-10.9863	-40.0696	-21.3623	-40.1001	-14.0381	-40.1001	-22.583	-40.1001	-50.0488	-40.1001	-108.643	-40.1001	-46.3867	-40.1001	-51.8799	-40.1001	-36.0107	-40.1001	-48.8281	-40.1001	-40.8936	-40.0696	-51.2695	-40.1001	-28.0762	-40.1001	-59.8145	-40.1306	-54.3213	-40.1306	-32.3486	-40.1001	-56.7627	-40.1306
0.3615	-17.7002	-40.1001	-7.32422	-40.1001	-9.15527	-40.1001	-18.9209	-40.0696	-17.0898	-40.1001	-27.4658	-40.0696	-46.9971	-40.0696	-106.201	-40.1001	-30.5176	-40.1306	-79.3457	-40.1001	-40.2832	-40.0696	-38.4521	-40.1001	-56.1523	-40.1001	-49.4385	-40.1001	-34.79	-40.1001	-59.8145	-40.1001	-54.9316	-40.1001	-28.0762	-40.1001	-53.7109	-40.1001
0.362	-11.5967	-40.0696	-23.8037	-40.1306	-12.207	-40.0696	-22.583	-40.0696	-15.8691	-40.0696	-34.79	-40.0696	-39.0625	-40.0696	-67.1387	-40.1001	-45.7764	-40.1001	-91.5527	-40.1001	-39.0625	-40.1001	-59.2041	-40.1001	-31.1279	-40.1306	-34.1797	-40.0696	-52.4902	-40.1306	-42.7246	-40.1306	-48.2178	-40.1001	-38.4521	-40.1306	-59.8145	-40.1001
0.3625	-8.54492	-40.0696	-13.4277	-40.0696	-15.2588	-40.1306	-9.76563	-40.1306	-14.6484	-40.1001	-48.2178	-40.0696	-37.2314	-40.1001	-86.6699	-40.1001	-34.1797	-40.1001	-85.4492	-40.1306	-18.3105	-40.1306	-53.7109	-40.1001	-46.3867	-40.1001	-47.6074	-40.1001	-39.6729	-40.1001	-46.9971	-40.1001	-47.6074	-40.1001	-29.2969	-40.1306	-61.0352	-40.1001
0.363	-20.752	-40.0696	-19.5313	-40.1306	-8.54492	-40.1001	-12.207	-40.1001	-23.1934	-40.1001	-32.3486	-40.1001	-32.959	-40.1001	-98.2666	-40.1306	-39.0625	-40.1306	-87.8906	-40.1001	-34.79	-40.1001	-38.4521	-40.1001	-39.0625	-40.1306	-40.8936	-40.1001	-29.9072	-40.0696	-54.9316	-40.1001	-48.8281	-40.1001	-45.166	-40.1001	-53.1006	-40.1001
0.3635	-14.0381	-40.1001	-29.9072	-40.1001	-24.4141	-40.1306	-10.376	-40.1001	-20.752	-40.1001	-29.9072	-40.1001	-29.9072	-40.1001	-92.7734	-40.1001	-42.7246	-40.0696	-69.5801	-40.1001	-31.1279	-40.1001	-52.4902	-40.1001	-31.1279	-40.1001	-36.0107	-40.1001	-32.959	-40.1001	-47.6074	-40.1001	-63.4766	-40.0696	-39.6729	-40.1001	-48.2178	-40.1001
0.364	-18.9209	-40.1611	-6.10352	-40.1306	-5.49316	-40.1306	-13.4277	-40.1001	-23.8037	-40.1306	-40.8936	-40.1001	-45.7764	-40.1001	-90.9424	-40.1001	-29.9072	-40.1001	-76.2939	-40.1001	-30.5176	-40.0696	-54.9316	-40.1001	-31.1279	-40.0696	-32.3486	-40.0696	-34.1797	-40.1001	-43.9453	-40.1001	-36.0107	-40.1306	-32.3486	-40.1001	-46.3867	-40.0696
0.3645	-11.5967	-40.0696	-11.5967	-40.1001	-11.5967	-40.1001	-20.1416	-40.1001	-25.0244	-40.1001	-20.1416	-40.0696	-56.1523	-40.1001	-83.0078	-40.1306	-45.166	-40.0696	-73.2422	-40.1306	-32.959	-40.1001	-52.4902	-40.1001	-42.7246	-40.1001	-46.9971	-40.1306	-41.5039	-40.1001	-34.79	-40.1001	-39.6729	-40.1001	-42.7246	-40.0696	-39.6729	-40.1001
0.365	-12.207	-40.1306	-9.15527	-40.1001	-16.4795	-40.1001	-26.8555	-40.0696	-31.1279	-40.1001	-33.5693	-40.1001	-48.8281	-40.1306	-87.2803	-40.0696	-45.166	-40.0696	-72.6318	-40.0696	-39.0625	-40.0696	-53.7109	-40.1001	-40.8936	-40.1001	-39.0625	-40.1306	-36.0107	-40.1001	-34.79	-40.0696	-50.6592	-40.1001	-33.5693	-40.1001	-42.7246	-40.1001
0.3655	-17.0898	-40.1001	-27.4658	-40.0696	-10.9863	-40.1001	-2.44141	-40.0696	-31.1279	-40.1001	-32.959	-40.0696	-31.7383	-40.0696	-97.6563	-40.1001	-44.5557	-40.0696	-83.6182	-40.1001	-29.2969	-40.1001	-42.7246	-40.0696	-34.1797	-40.0696	-42.7246	-40.0696	-42.1143	-40.1306	-41.5039	-40.1001	-53.1006	-40.1001	-41.5039	-40.1001	-30.5176	-40.0696
0.366	-12.8174	-40.0696	-8.54492	-40.0696	-17.0898	-40.1001	-8.54492	-40.1001	-26.8555	-40.1001	-34.79	-40.1001	-29.2969	-40.1001	-97.6563	-40.1001	-20.1416	-40.0696	-67.1387	-40.0696	-29.2969	-40.0696	-45.7764	-40.1306	-50.0488	-40.1001	-34.79	-40.0696	-45.166	-40.1306	-48.2178	-40.0696	-47.6074	-40.1306	-42.1143	-40.0696	-46.3867	-40.0696
0.3665	-26.2451	-40.1001	-5.49316	-40.1001	-17.0898	-40.0696	-12.8174	-40.0696	-18.9209	-40.1001	-28.6865	-40.1001	-26.8555	-40.1001	-93.9941	-40.0696	-20.1416	-40.1306	-73.2422	-40.1001	-22.583	-40.1001	-59.2041	-40.1306	-42.1143	-40.1001	-40.2832	-40.1001	-42.7246	-40.0696	-39.0625	-40.1001	-49.4385	-40.0696	-32.959	-40.1306	-56.1523	-40.1001
0.367	-16.4795	-40.1001	-23.1934	-40.1001	-10.9863	-40.1306	-15.8691	-40.1001	-24.4141	-40.1001	-32.959	-40.1001	-50.0488	-40.1001	-102.539	-40.1001	-25.6348	-40.1001	-60.4248	-40.1001	-20.752	-40.1001	-53.7109	-40.1001	-53.1006	-40.1001	-32.3486	-40.1001	-50.6592	-40.1001	-39.6729	-40.1001	-35.4004	-40.1001	-39.0625	-40.1306	-42.1143	-40.1306
0.3675	-20.752	-40.1001	-16.4795	-40.0696	-1.83105	-40.0696	-22.583	-40.1001	-22.583	-40.1306	-26.8555	-40.1306	-69.5801	-40.0696	-75.6836	-40.1306	-27.4658	-40.1001	-84.2285	-40.1306	-34.1797	-40.1001	-42.1143	-40.1001	-50.6592	-40.1306	-40.8936	-40.1001	-35.4004	-40.0696	-48.8281	-40.0696	-29.9072	-40.1001	-42.1143	-40.1001	-40.8936	-40.1001
0.368	-17.7002	-40.0696	-18.3105	-40.1001	-9.15527	-40.1001	-16.4795	-40.0696	-39.6729	-40.1001	-31.7383	-40.1001	-45.7764	-40.1001	-83.6182	-40.1001	-31.7383	-40.0696	-87.8906	-40.0696	-37.2314	-40.0696	-32.3486	-40.1001	-55.542	-40.1001	-41.5039	-40.1001	-40.2832	-40.1001	-39.6729	-40.0696	-38.4521	-40.0696	-37.8418	-40.0696	-40.2832	-40.1306
0.3685	-10.376	-40.1001	-11.5967	-40.0696	-13.4277	-40.1001	-15.2588	-40.1001	-27.4658	-40.1001	-34.79	-40.1001	-52.4902	-40.1001	-96.4355	-40.1001	-35.4004	-40.0696	-84.8389	-40.0696	-35.4004	-40.1001	-53.1006	-40.1001	-51.2695	-40.1001	-39.6729	-40.1001	-45.166	-40.1001	-49.4385	-40.0696	-49.4385	-40.1001	-47.6074	-40.1001	-48.2178	-40.1001
0.369	-20.752	-40.1306	-4.27246	-40.1001	-3.05176	-40.1001	-36.0107	-40.0696	-27.4658	-40.1001	-34.1797	-40.1001	-50.0488	-40.1306	-71.4111	-40.1001	-51.8799	-40.1001	-76.2939	-40.1001	-39.0625	-40.1001	-47.6074	-40.1001	-53.1006	-40.1001	-43.9453	-40.1001	-39.6729	-40.1306	-51.2695	-40.1001	-40.8936	-40.1001	-49.4385	-40.1001	-54.3213	-40.1001
0.3695	-16.4795	-40.1001	-24.4141	-40.1001	-15.2588	-40.1001	-23.8037	-40.0696	-24.4141	-40.1001	-28.6865	-40.1001	-39.0625	-40.0696	-70.8008	-40.1001	-53.7109	-40.1001	-53.7109	-40.1001	-34.1797	-40.1001	-45.166	-40.0696	-42.1143	-40.1001	-39.6729	-40.1001	-42.7246	-40.0696	-51.2695	-40.1001	-34.79	-40.1001	-48.2178	-40.1306	-46.3867	-40.0696
0.37	-12.8174	-40.1001	-13.4277	-40.0696	-4.88281	-40.1001	-14.6484	-40.1001	-12.8174	-40.1001	-21.9727	-40.0696	-59.8145	-40.1001	-65.3076	-40.1001	-54.3213	-40.1001	-58.5938	-40.1001	-25.0244	-40.1306	-31.1279	-40.0696	-51.8799	-40.1001	-31.1279	-40.1001	-30.5176	-40.1001	-48.8281	-40.1001	-42.7246	-40.1306	-55.542	-40.1001	-49.4385	-40.1001
0.3705	-14.6484	-40.1306	-17.0898	-40.0696	-3.66211	-40.1001	-14.0381	-40.1001	-21.3623	-40.0696	-29.9072	-40.1001	-46.9971	-40.1001	-60.4248	-40.1306	-51.8799	-40.1306	-50.0488	-40.1001	-43.335	-40.0696	-40.2832	-40.0696	-37.2314	-40.0696	-41.5039	-40.1001	-47.6074	-40.1306	-55.542	-40.0696	-29.2969	-40.0696	-49.4385	-40.1001	-48.8281	-40.1001
0.371	-17.7002	-40.1001	-20.752	-40.1001	-27.4658	-40.1306	-17.7002	-40.1001	-26.2451	-40.1001	-34.79	-40.1001	-43.335	-40.1001	-68.3594	-40.1306	-45.7764	-40.1306	-64.0869	-40.1001	-42.1143	-40.1306	-36.0107	-40.1001	-43.9453	-40.1001	-29.9072	-40.1001	-39.6729	-40.0696	-51.2695	-40.0696	-40.8936	-40.1001	-41.5039	-40.1001	-34.79	-40.1001
0.3715	-18.3105	-40.1001	-19.5313	-40.1001	-6.71387	-40.1001	-32.3486	-40.1306	-32.959	-40.1306	-32.959	-40.0696	-34.1797	-40.0696	-70.8008	-40.1001	-25.6348	-40.0696	-77.5146	-40.1306	-37.2314	-40.1001	-46.9971	-40.0696	-51.2695	-40.1001	-22.583	-40.1001	-34.79	-40.1001	-56.7627	-40.1001	-37.2314	-40.1001	-33.5693	-40.0696	-37.8418	-40.1611
0.372	-15.2588	-40.1001	-1.2207	-40.1001	-19.5313	-40.1001	-23.8037	-40.1306	-18.3105	-40.1001	-40.2832	-40.1306	-38.4521	-40.1001	-64.0869	-40.1306	-48.2178	-40.0696	-79.9561	-40.1306	-48.8281	-40.1306	-40.2832	-40.1001	-48.2178	-40.1001	-35.4004	-40.0696	-40.2832	-40.1001	-39.6729	-40.1001	-31.1279	-40.1001	-57.373	-40.0696	-55.542	-40.1001
0.3725	-17.7002	-40.1001	-9.15527	-40.1001	-7.93457	-40.1306	-22.583	-40.0696	-34.1797	-40.1001	-27.4658	-40.1001	-47.6074	-40.1001	-61.6455	-40.1001	-48.8281	-40.1001	-80.5664	-40.1001	-36.6211	-40.1001	-43.335	-40.0696	-42.7246	-40.1001	-23.1934	-40.0696	-47.6074	-40.1001	-38.4521	-40.1001	-39.0625	-40.0696	-55.542	-40.1001	-31.7383	-40.0696
0.373	-20.752	-40.1001	-18.3105	-40.1001	-7.32422	-40.1001	-19.5313	-40.0696	-21.9727	-40.1001	-40.8936	-40.1001	-39.0625	-40.1001	-49.4385	-40.0696	-48.2178	-40.1001	-77.5146	-40.1306	-45.7764	-40.1001	-46.9971	-40.1001	-44.5557	-40.1001	-40.8936	-40.1001	-36.6211	-40.0696	-48.8281	-40.1001	-31.1279	-40.1001	-53.1006	-40.1001	-39.0625	-40.1001
0.3735	-21.9727	-40.1001	-8.54492	-40.1306	-5.49316	-40.1001	-28.0762	-40.1001	-34.79	-40.1001	-37.2314	-40.1001	-37.2314	-40.1001	-57.9834	-40.0696	-53.7109	-40.1001	-61.6455	-40.1001	-42.1143	-40.0696	-50.0488	-40.0696	-49.4385	-40.1001	-51.8799	-40.1001	-51.2695	-40.1001	-42.1143	-40.1001	-43.9453	-40.1001	-52.4902	-40.1001	-52.4902	-40.1001
0.374	-23.1934	-40.0696	-12.8174	-40.1306	-17.0898	-40.0696	-43.335	-40.0696	-15.2588	-40.1306	-21.3623	-40.1001	-42.7246	-40.1001	-81.1768	-40.1001	-62.8662	-40.0696	-67.749	-40.1306	-34.1797	-40.1001	-35.4004	-40.1001	-40.8936	-40.1001	-30.5176	-40.1306	-31.7383	-40.1001	-43.335	-40.0696	-32.959	-40.1001	-53.1006	-40.1306	-46.3867	-40.1001
0.3745	-3.66211	-40.0696	-23.1934	-40.1001	-6.10352	-40.1001	-23.1934	-40.1001	-32.959	-40.1001	-29.9072	-40.1001	-56.7627	-40.0696	-76.9043	-40.1001	-62.2559	-40.1001	-52.4902	-40.1306	-32.3486	-40.1001	-32.959	-40.0696	-49.4385	-40.1306	-40.2832	-40.1001	-28.6865	-40.1001	-45.166	-40.0696	-38.4521	-40.1306	-64.6973	-40.1306	-50.6592	-40.1001
0.375	-23.8037	-40.1306	-21.9727	-40.1306	-7.93457	-40.1001	-28.0762	-40.1001	-36.6211	-40.1001	-26.2451	-40.1001	-46.3867	-40.1001	-70.8008	-40.1306	-51.8799	-40.1001	-81.7871	-40.1306	-32.959	-40.0696	-33.5693	-40.1611	-46.9971	-40.1306	-41.5039	-40.1001	-36.0107	-40.0696	-42.7246	-40.0696	-36.6211	-40.0696	-61.6455	-40.0696	-53.1006	-40.1306
0.3755	-12.8174	-40.0696	-12.8174	-40.1001	-12.8174	-40.1001	-26.8555	-40.1001	-22.583	-40.1001	-27.4658	-40.1001	-48.2178	-40.1001	-61.6455	-40.1001	-51.2695	-40.1306	-76.9043	-40.0696	-25.0244	-40.0696	-30.5176	-40.0696	-42.1143	-40.1001	-46.9971	-40.1001	-42.7246	-40.1001	-60.4248	-40.0696	-32.959	-40.1001	-53.1006	-40.1001	-60.4248	-40.0696
0.376	-11.5967	-40.1001	-17.0898	-40.1306	-4.88281	-40.1001	-28.6865	-40.1001	-24.4141	-40.1001	-40.8936	-40.1001	-38.4521	-40.1001	-62.2559	-40.1001	-73.2422	-40.1001	-64.6973	-40.1001	-32.959	-40.1306	-29.2969	-40.1001	-43.335	-40.0696	-32.959	-40.1001	-34.79	-40.0696	-41.5039	-40.1001	-33.5693	-40.0696	-57.373	-40.0696	-48.2178	-40.1001
0.3765	-19.5313	-40.1306	-28.0762	-40.1001	-1.83105	-40.1306	-25.6348	-40.1306	-35.4004	-40.1001	-35.4004	-40.0696	-44.5557	-40.1001	-69.5801	-40.1001	-64.6973	-40.0696	-77.5146	-40.1306	-30.5176	-40.1001	-38.4521	-40.1001	-35.4004	-40.1001	-48.2178	-40.0696	-31.1279	-40.0696	-46.9971	-40.0696	-29.2969	-40.1001	-40.8936	-40.0696	-55.542	-40.1001
0.377	-18.9209	-40.1001	-17.0898	-40.1001	2.44141	-40.1001	-31.7383	-40.1001	-14.6484	-40.0696	-23.1934	-40.1001	-44.5557	-40.1001	-74.4629	-40.1306	-59.8145	-40.1306	-76.9043	-40.1001	-33.5693	-40.1001	-59.8145	-40.1001	-36.6211	-40.0696	-48.2178	-40.1001	-28.0762	-40.1001	-47.6074	-40.1001	-29.2969	-40.0696	-45.166	-40.0696	-46.9971	-40.1001
0.3775	-1.2207	-40.1001	-15.8691	-40.1001	-3.05176	-40.1306	-15.8691	-40.0696	-23.8037	-40.1001	-32.3486	-40.0696	-34.79	-40.0696	-60.4248	-40.0696	-82.3975	-40.1001	-61.0352	-40.1001	-32.959	-40.0696	-43.335	-40.0696	-48.8281	-40.1306	-48.2178	-40.1001	-29.2969	-40.0696	-54.9316	-40.0696	-34.79	-40.1001	-46.3867	-40.1001	-46.3867	-40.1001
0.378	-15.2588	-40.0696	-14.0381	-40.1001	-3.05176	-40.0696	-20.1416	-40.0696	-21.3623	-40.1001	-27.4658	-40.1001	-45.7764	-40.1001	-72.0215	-40.1001	-54.9316	-40.1001	-72.0215	-40.0696	-37.2314	-40.1001	-33.5693	-40.1001	-39.6729	-40.1001	-45.7764	-40.1001	-43.9453	-40.0696	-43.9453	-40.1001	-39.0625	-40.0696	-43.335	-40.1001	-52.4902	-40.1001
0.3785	-17.0898	-40.1001	-7.93457	-40.1001	-7.93457	-40.1001	-26.8555	-40.1001	-42.7246	-40.1001	-27.4658	-40.1001	-38.4521	-40.0696	-84.2285	-40.1001	-61.6455	-40.1001	-82.3975	-40.1611	-42.7246	-40.1001	-48.8281	-40.1306	-39.0625	-40.1306	-57.9834	-40.1001	-41.5039	-40.0696	-43.335	-40.1001	-40.2832	-40.1001	-57.9834	-40.1001	-47.6074	-40.1001
0.379	-19.5313	-40.0696	-31.7383	-40.1306	-17.7002	-40.1001	-34.1797	-40.1001	-29.2969	-40.1001	-23.1934	-40.1001	-53.7109	-40.0696	-83.6182	-40.1001	-31.7383	-40.1001	-90.9424	-40.1306	-38.4521	-40.1001	-47.6074	-40.1001	-39.6729	-40.1001	-45.166	-40.1001	-33.5693	-40.1001	-47.6074	-40.1001	-52.4902	-40.0696	-51.2695	-40.1306	-45.166	-40.1001
0.3795	-21.9727	-40.0696	-19.5313	-40.1001	-14.0381	-40.0696	-36.0107	-40.1001	-23.8037	-40.1001	-34.79	-40.1001	-42.1143	-40.0696	-75.6836	-40.1001	-46.9971	-40.1001	-72.6318	-40.1001	-31.1279	-40.1001	-34.1797	-40.1001	-41.5039	-40.0696	-40.2832	-40.1001	-40.2832	-40.1001	-36.6211	-40.1306	-43.9453	-40.1001	-51.2695	-40.1001	-53.7109	-40.1001
0.38	-10.376	-40.1001	-14.0381	-40.0696	-1.83105	-40.1001	-8.54492	-40.1306	-25.6348	-40.0696	-31.7383	-40.1001	-36.0107	-40.1001	-74.4629	-40.1001	-48.8281	-40.1001	-65.918	-40.1001	-23.8037	-40.1001	-45.7764	-40.1001	-39.6729	-40.1001	-45.166	-40.1001	-48.2178	-40.1001	-42.1143	-40.1001	-39.6729	-40.1001	-51.2695	-40.1001	-39.0625	-40.1001
0.3805	-22.583	-40.1001	-10.9863	-40.0696	-12.8174	-40.1306	-18.3105	-40.1001	-23.8037	-40.1001	-19.5313	-40.1001	-49.4385	-40.1306	-68.9697	-40.0696	-50.6592	-40.1001	-92.7734	-40.1001	-30.5176	-40.1001	-48.8281	-40.0696	-46.9971	-40.1306	-44.5557	-40.1306	-50.0488	-40.1001	-33.5693	-40.1001	-43.9453	-40.1001	-45.166	-40.0696	-31.7383	-40.1001
0.381	-16.4795	-40.0696	-21.3623	-40.1001	-21.3623	-40.0696	-17.0898	-40.1001	-28.0762	-40.1001	-25.0244	-40.1001	-54.9316	-40.1001	-57.373	-40.0696	-46.9971	-40.1001	-63.4766	-40.1001	-23.1934	-40.0696	-54.9316	-40.1001	-44.5557	-40.1001	-53.7109	-40.1001	-32.3486	-40.1001	-34.79	-40.1001	-37.2314	-40.1001	-49.4385	-40.1001	-44.5557	-40.0696
0.3815	-15.2588	-40.1001	-29.9072	-40.1001	-15.8691	-40.0696	-20.752	-40.1001	-32.959	-40.1306	-21.3623	-40.1001	-57.373	-40.1306	-52.4902	-40.1001	-40.8936	-40.1001	-76.2939	-40.0696	-30.5176	-40.1001	-51.8799	-40.1001	-40.8936	-40.0696	-46.3867	-40.1001	-51.2695	-40.1001	-44.5557	-40.1001	-34.79	-40.1001	-46.3867	-40.1001	-52.4902	-40.0696
0.382	-12.8174	-40.1001	-10.376	-40.1001	-2.44141	-40.1001	-11.5967	-40.1001	-29.2969	-40.0696	-25.0244	-40.1001	-43.335	-40.1306	-55.542	-40.0696	-52.4902	-40.1001	-68.9697	-40.1001	-44.5557	-40.1306	-52.4902	-40.1001	-36.0107	-40.1001	-36.0107	-40.1001	-23.8037	-40.0696	-51.2695	-40.1001	-45.166	-40.1001	-65.3076	-40.1306	-38.4521	-40.0696
0.3825	-10.376	-40.1001	-25.0244	-40.1001	1.83105	-40.1001	-17.7002	-40.1001	-26.2451	-40.0696	-32.3486	-40.0696	-57.9834	-40.1001	-83.6182	-40.1001	-32.3486	-40.1306	-86.0596	-40.1306	-26.8555	-40.1306	-55.542	-40.1001	-43.335	-40.1001	-34.1797	-40.1306	-30.5176	-40.1001	-44.5557	-40.1001	-43.335	-40.1001	-42.7246	-40.1001	-49.4385	-40.1001
0.383	-14.6484	-40.1001	-24.4141	-40.1306	-5.49316	-40.1001	-20.1416	-40.1001	-26.8555	-40.1001	-36.6211	-40.1001	-38.4521	-40.1001	-84.2285	-40.1306	-45.7764	-40.1001	-71.4111	-40.1001	-26.2451	-40.1001	-42.7246	-40.1306	-29.2969	-40.0696	-45.7764	-40.1001	-40.2832	-40.0696	-46.9971	-40.1001	-45.7764	-40.1001	-49.4385	-40.1306	-50.0488	-40.1306
0.3835	-9.76563	-40.1001	-17.7002	-40.1001	-9.76563	-40.1306	-18.3105	-40.1306	-31.1279	-40.1001	-20.752	-40.1001	-55.542	-40.1001	-88.501	-40.1001	-40.8936	-40.1001	-83.0078	-40.1001	-30.5176	-40.1306	-45.166	-40.1001	-39.6729	-40.1001	-44.5557	-40.0696	-53.1006	-40.1001	-46.3867	-40.1306	-61.0352	-40.1001	-32.3486	-40.1001	-42.1143	-40.1001
0.384	-6.71387	-40.1001	-15.8691	-40.1001	-9.15527	-40.1001	-15.8691	-40.0696	-29.9072	-40.1001	-32.3486	-40.1306	-51.2695	-40.0696	-93.9941	-40.1001	-37.8418	-40.1001	-84.2285	-40.0696	-23.8037	-40.0696	-40.2832	-40.1001	-40.8936	-40.0696	-40.2832	-40.1306	-36.6211	-40.1001	-52.4902	-40.1001	-40.2832	-40.1001	-43.335	-40.1001	-38.4521	-40.1001
0.3845	-16.4795	-40.1306	-14.6484	-40.0696	-6.71387	-40.1001	-34.79	-40.1001	-30.5176	-40.0696	-20.1416	-40.1306	-42.7246	-40.1001	-74.4629	-40.1306	-28.0762	-40.0696	-90.332	-40.1001	-17.7002	-40.1001	-45.7764	-40.1001	-40.8936	-40.1001	-39.0625	-40.1001	-53.7109	-40.1001	-41.5039	-40.1306	-43.335	-40.1001	-51.8799	-40.0696	-37.8418	-40.1001
0.385	-9.15527	-40.1001	-7.93457	-40.1001	-12.207	-40.0696	-14.0381	-40.1001	-32.959	-40.1001	-18.9209	-40.1306	-47.6074	-40.1001	-79.3457	-40.1001	-42.1143	-40.0696	-79.9561	-40.1306	-25.0244	-40.1001	-52.4902	-40.1001	-46.3867	-40.1306	-43.9453	-40.1001	-31.1279	-40.1001	-40.2832	-40.1001	-53.1006	-40.1001	-46.9971	-40.1001	-49.4385	-40.1001
0.3855	-10.9863	-40.0696	-22.583	-40.1001	-7.93457	-40.1001	-22.583	-40.0696	-17.7002	-40.1001	-22.583	-40.1001	-37.8418	-40.1001	-77.5146	-40.1001	-64.6973	-40.1001	-100.708	-40.1306	-40.8936	-40.1001	-53.1006	-40.0696	-42.1143	-40.1306	-45.166	-40.1306	-34.1797	-40.1001	-37.2314	-40.0696	-42.7246	-40.1001	-56.7627	-40.1001	-39.0625	-40.1001
0.386	-11.5967	-40.1001	-20.752	-40.0696	-11.5967	-40.1001	-23.1934	-40.0696	-26.8555	-40.1001	-36.6211	-40.0696	-35.4004	-40.1001	-94.6045	-40.1001	-56.7627	-40.1001	-88.501	-40.1001	-32.959	-40.1306	-45.166	-40.1001	-50.6592	-40.0696	-44.5557	-40.1001	-49.4385	-40.1306	-51.8799	-40.1001	-32.3486	-40.1001	-47.6074	-40.1306	-28.0762	-40.1001
0.3865	-17.7002	-40.0696	-14.0381	-40.1001	-6.71387	-40.1001	-11.5967	-40.1001	-29.9072	-40.1001	-26.8555	-40.1001	-29.2969	-40.0696	-81.1768	-40.1306	-44.5557	-40.1001	-87.8906	-40.1001	-21.9727	-40.1001	-55.542	-40.1306	-45.7764	-40.1001	-31.7383	-40.0696	-42.1143	-40.1001	-46.3867	-40.1001	-38.4521	-40.1001	-42.7246	-40.1306	-45.7764	-40.1001
0.387	-13.4277	-40.1001	-18.9209	-40.1306	-13.4277	-40.1001	-21.3623	-40.1001	-23.8037	-40.1001	-14.0381	-40.1001	-37.8418	-40.1306	-59.8145	-40.1001	-51.8799	-40.1001	-79.9561	-40.1001	-39.0625	-40.1306	-51.2695	-40.1001	-48.8281	-40.1001	-24.4141	-40.1001	-60.4248	-40.1001	-38.4521	-40.1001	-50.6592	-40.1001	-43.335	-40.1001	-37.8418	-40.1001
0.3875	-9.76563	-40.1001	-23.8037	-40.0696	-9.76563	-40.1001	-10.9863	-40.0696	-30.5176	-40.0696	-21.3623	-40.1001	-45.166	-40.1001	-68.9697	-40.1001	-50.6592	-40.0696	-78.7354	-40.1001	-38.4521	-40.1001	-53.1006	-40.1001	-34.79	-40.1001	-32.959	-40.1001	-42.1143	-40.1001	-43.335	-40.1306	-39.6729	-40.1001	-42.7246	-40.1306	-45.166	-40.1001
0.388	-12.8174	-40.1001	-20.1416	-40.1001	-13.4277	-40.1306	-13.4277	-40.1001	-30.5176	-40.1001	-20.752	-40.1001	-40.8936	-40.1001	-84.2285	-40.1001	-63.4766	-40.1001	-98.2666	-40.1001	-33.5693	-40.1001	-47.6074	-40.1306	-43.9453	-40.0696	-32.3486	-40.1306	-31.7383	-40.1001	-32.3486	-40.1306	-47.6074	-40.1001	-39.0625	-40.1001	-39.6729	-40.1001
0.3885	-25.0244	-40.1001	-14.0381	-40.1306	-19.5313	-40.1001	-12.8174	-40.1001	-29.9072	-40.1001	-40.8936	-40.1001	-56.1523	-40.1001	-71.4111	-40.0696	-65.3076	-40.1001	-81.1768	-40.1001	-21.9727	-40.1001	-35.4004	-40.1001	-40.8936	-40.1001	-47.6074	-40.1306	-43.335	-40.0696	-47.6074	-40.1001	-39.0625	-40.0696	-42.7246	-40.0696	-36.0107	-40.1001
0.389	-32.3486	-40.1306	-13.4277	-40.0696	-12.8174	-40.1001	-36.0107	-40.1001	-16.4795	-40.1001	-27.4658	-40.1001	-35.4004	-40.1001	-69.5801	-40.1001	-60.4248	-40.1001	-83.0078	-40.1001	-42.1143	-40.1001	-43.335	-40.1001	-39.6729	-40.0696	-54.3213	-40.1001	-48.8281	-40.1001	-39.6729	-40.1001	-34.79	-40.1001	-55.542	-40.0696	-35.4004	-40.1001
0.3895	-22.583	-40.1001	-14.6484	-40.1001	-31.1279	-40.1001	-26.8555	-40.0696	-21.9727	-40.1001	-20.752	-40.1001	-34.79	-40.1001	-68.3594	-40.1001	-55.542	-40.1001	-83.0078	-40.1001	-25.0244	-40.1001	-46.3867	-40.1001	-40.2832	-40.1306	-42.7246	-40.1001	-39.6729	-40.1001	-35.4004	-40.1001	-43.9453	-40.1001	-48.8281	-40.1001	-46.3867	-40.1001
0.39	-22.583	-40.1001	-20.1416	-40.1001	-33.5693	-40.1001	-23.8037	-40.1001	-22.583	-40.1001	-29.2969	-40.1001	-44.5557	-40.1001	-79.9561	-40.0696	-36.6211	-40.1001	-70.8008	-40.0696	-31.1279	-40.1001	-38.4521	-40.0696	-37.8418	-40.0696	-43.9453	-40.0696	-43.9453	-40.0696	-34.1797	-40.1001	-35.4004	-40.0696	-36.6211	-40.1306	-37.2314	-40.1001
0.3905	-28.0762	-40.0696	-15.8691	-40.0696	-23.8037	-40.1001	-18.9209	-40.1306	-22.583	-40.1001	-34.79	-40.0696	-39.0625	-40.1001	-93.3838	-40.1001	-45.7764	-40.1306	-65.918	-40.1001	-37.2314	-40.1001	-42.7246	-40.1001	-45.166	-40.1001	-23.8037	-40.0696	-44.5557	-40.1001	-57.373	-40.0696	-37.2314	-40.1001	-45.7764	-40.1001	-38.4521	-40.1001
0.391	-32.959	-40.0696	-17.0898	-40.0696	-18.3105	-40.1306	-17.0898	-40.0696	-22.583	-40.1001	-28.0762	-40.1306	-48.2178	-40.1001	-75.6836	-40.1306	-55.542	-40.1306	-81.7871	-40.1306	-44.5557	-40.1001	-36.6211	-40.1306	-45.7764	-40.1001	-31.7383	-40.0696	-51.8799	-40.1001	-45.7764	-40.1306	-48.2178	-40.1306	-45.7764	-40.1306	-43.9453	-40.0696
0.3915	-24.4141	-40.1001	-15.2588	-40.1001	-14.0381	-40.1001	-31.1279	-40.1001	-21.9727	-40.1001	-36.0107	-40.1001	-48.8281	-40.0696	-51.8799	-40.1001	-46.9971	-40.1306	-83.6182	-40.1306	-34.1797	-40.1001	-48.8281	-40.1001	-51.2695	-40.1001	-26.8555	-40.1001	-28.0762	-40.1001	-41.5039	-40.1001	-48.8281	-40.0696	-51.2695	-40.1001	-46.9971	-40.1001
0.392	-31.1279	-40.1001	-22.583	-40.1001	-18.3105	-40.1001	-15.8691	-40.1306	-42.1143	-40.0696	-18.9209	-40.1306	-51.2695	-40.1001	-67.749	-40.0696	-59.8145	-40.1001	-73.8525	-40.1001	-37.8418	-40.1001	-49.4385	-40.1306	-53.7109	-40.1001	-43.335	-40.1001	-31.7383	-40.1001	-53.7109	-40.1001	-39.0625	-40.0696	-61.6455	-40.1001	-59.8145	-40.1001
0.3925	-30.5176	-40.1001	-15.2588	-40.0696	-7.93457	-40.0696	-29.9072	-40.1001	-21.3623	-40.1001	-18.3105	-40.0696	-43.9453	-40.1001	-76.2939	-40.1001	-40.8936	-40.1001	-76.9043	-40.1306	-30.5176	-40.1001	-47.6074	-40.1001	-51.2695	-40.1306	-37.2314	-40.0696	-57.9834	-40.1306	-52.4902	-40.1001	-31.1279	-40.1306	-51.8799	-40.0696	-39.0625	-40.1001
0.393	-25.0244	-40.1001	-27.4658	-40.1001	-8.54492	-40.1001	-22.583	-40.1306	-15.8691	-40.1001	-29.2969	-40.1001	-45.166	-40.0696	-62.2559	-40.1001	-47.6074	-40.1001	-69.5801	-40.1001	-33.5693	-40.0696	-40.8936	-40.0696	-44.5557	-40.1001	-36.0107	-40.1001	-34.79	-40.1001	-50.0488	-40.1001	-31.7383	-40.0696	-43.335	-40.1001	-51.2695	-40.1001
0.3935	-21.9727	-40.1001	-9.15527	-40.1001	-0.610352	-40.1001	-20.1416	-40.1001	-26.8555	-40.0696	-32.3486	-40.0696	-31.7383	-40.1306	-79.3457	-40.1001	-55.542	-40.0696	-64.6973	-40.1001	-29.9072	-40.0696	-48.2178	-40.0696	-42.1143	-40.1001	-37.8418	-40.1001	-32.959	-40.0696	-42.1143	-40.1306	-37.2314	-40.1001	-45.7764	-40.1001	-46.3867	-40.1001
0.394	-19.5313	-40.1306	0	-40.1001	-9.76563	-40.1306	-30.5176	-40.1001	-25.0244	-40.0696	-28.0762	-40.1001	-34.79	-40.0696	-70.8008	-40.1001	-53.1006	-40.1001	-78.7354	-40.0696	-35.4004	-40.1001	-39.6729	-40.1306	-48.8281	-40.1001	-31.7383	-40.0696	-23.8037	-40.1001	-54.9316	-40.1001	-33.5693	-40.1306	-37.2314	-40.1306	-42.1143	-40.0696
0.3945	-24.4141	-40.0696	-21.9727	-40.1001	-10.376	-40.1001	-18.9209	-40.1001	-24.4141	-40.1001	-23.1934	-40.1001	-52.4902	-40.1001	-65.918	-40.1001	-54.3213	-40.1001	-77.5146	-40.1001	-38.4521	-40.1306	-48.2178	-40.1306	-61.0352	-40.1001	-37.2314	-40.0696	-32.3486	-40.0696	-52.4902	-40.1001	-29.9072	-40.1001	-40.2832	-40.1306	-39.0625	-40.1306
0.395	-15.2588	-40.1001	-17.0898	-40.1001	-17.7002	-40.1001	-30.5176	-40.1001	-29.2969	-40.1001	-18.3105	-40.1001	-59.2041	-40.0696	-60.4248	-40.1001	-77.5146	-40.1001	-64.6973	-40.1001	-35.4004	-40.1001	-25.0244	-40.1306	-46.3867	-40.1306	-25.0244	-40.1001	-36.0107	-40.1001	-50.6592	-40.1001	-32.959	-40.1001	-43.335	-40.1306	-47.6074	-40.0696
0.3955	-25.0244	-40.1306	-1.2207	-40.1001	-8.54492	-40.1306	-13.4277	-40.0696	-36.0107	-40.0696	-28.6865	-40.1001	-51.2695	-40.1001	-80.5664	-40.1001	-64.6973	-40.1001	-76.2939	-40.0696	-33.5693	-40.1306	-46.9971	-40.1306	-32.3486	-40.1306	-39.6729	-40.1306	-22.583	-40.1001	-59.8145	-40.1001	-42.1143	-40.1306	-36.6211	-40.0696	-44.5557	-40.1306
0.396	-28.0762	-40.1001	-11.5967	-40.1306	-14.0381	-40.1001	-14.0381	-40.1001	-21.9727	-40.0696	-21.3623	-40.1001	-45.166	-40.1001	-83.6182	-40.1001	-78.125	-40.1001	-68.9697	-40.1306	-39.6729	-40.1001	-28.6865	-40.1001	-50.0488	-40.1001	-39.6729	-40.1001	-42.7246	-40.1001	-51.2695	-40.1001	-40.8936	-40.0696	-31.7383	-40.1001	-53.1006	-40.1001
0.3965	-23.8037	-40.1001	-18.3105	-40.0696	-19.5313	-40.1001	-23.8037	-40.1001	-32.959	-40.0696	-19.5313	-40.1306	-52.4902	-40.1001	-80.5664	-40.1306	-67.1387	-40.1001	-55.542	-40.0696	-30.5176	-40.1001	-45.166	-40.1001	-36.0107	-40.1001	-31.1279	-40.1001	-49.4385	-40.1306	-51.8799	-40.1001	-32.959	-40.1001	-40.8936	-40.1001	-40.8936	-40.0696
0.397	-19.5313	-40.0696	-17.0898	-40.0696	-14.0381	-40.1001	-25.0244	-40.1001	-10.376	-40.1001	-26.2451	-40.0696	-46.3867	-40.1001	-62.8662	-40.1001	-54.3213	-40.1001	-59.8145	-40.1001	-27.4658	-40.1001	-58.5938	-40.0696	-47.6074	-40.1001	-40.2832	-40.1001	-34.1797	-40.1001	-61.0352	-40.1001	-32.3486	-40.1001	-37.8418	-40.1001	-54.3213	-40.1001
0.3975	-21.9727	-40.1001	-21.9727	-40.0696	-10.9863	-40.1001	-23.1934	-40.1001	-28.0762	-40.1001	-19.5313	-40.1001	-46.9971	-40.1306	-72.6318	-40.1001	-57.373	-40.1001	-43.9453	-40.1001	-41.5039	-40.1001	-40.8936	-40.0696	-44.5557	-40.1001	-48.8281	-40.1001	-38.4521	-40.0696	-54.9316	-40.1001	-31.7383	-40.1306	-38.4521	-40.1001	-67.749	-40.1001
0.398	-13.4277	-40.0696	-15.8691	-40.1001	-18.9209	-40.1001	-15.2588	-40.1001	-18.3105	-40.1001	-19.5313	-40.0696	-41.5039	-40.1001	-43.335	-40.1001	-57.373	-40.1001	-79.9561	-40.1001	-33.5693	-40.1306	-38.4521	-40.1001	-50.0488	-40.1001	-40.2832	-40.0696	-40.8936	-40.0696	-63.4766	-40.1001	-49.4385	-40.1001	-46.9971	-40.1306	-54.9316	-40.1001
0.3985	-12.207	-40.1001	-15.8691	-40.1001	-20.1416	-40.1001	-21.9727	-40.1001	-28.0762	-40.0696	-20.1416	-40.1001	-48.2178	-40.1001	-78.7354	-40.1001	-52.4902	-40.1001	-54.3213	-40.1001	-57.9834	-40.1001	-44.5557	-40.1001	-36.6211	-40.1001	-37.2314	-40.1001	-45.166	-40.1001	-51.2695	-40.1001	-37.2314	-40.1001	-17.0898	-40.0696	-43.335	-40.1001
0.399	-10.9863	-40.0696	-9.15527	-40.1001	-15.2588	-40.1001	-9.76563	-40.1001	-31.1279	-40.1001	-23.1934	-40.1306	-53.7109	-40.1001	-72.0215	-40.1001	-38.4521	-40.1001	-76.9043	-40.1001	-20.752	-40.1001	-42.7246	-40.1001	-48.2178	-40.1001	-39.0625	-40.0696	-36.0107	-40.1001	-48.8281	-40.1001	-40.8936	-40.1001	-33.5693	-40.1001	-52.4902	-40.0696
0.3995	-20.752	-40.1001	-23.8037	-40.1001	-9.15527	-40.0696	-24.4141	-40.1001	-21.3623	-40.1001	-30.5176	-40.1001	-50.0488	-40.1001	-78.125	-40.1001	-59.8145	-40.1001	-71.4111	-40.1001	-40.2832	-40.1001	-51.2695	-40.1001	-38.4521	-40.0696	-36.0107	-40.1001	-46.9971	-40.1001	-51.8799	-40.1306	-53.7109	-40.1001	-50.6592	-40.1001	-48.2178	-40.1306
0.4	-23.1934	-40.1306	-25.0244	-40.0696	-24.4141	-40.1001	-15.2588	-40.1001	-21.9727	-40.1001	-32.959	-40.0696	-45.166	-40.1001	-72.0215	-40.1001	-69.5801	-40.0696	-68.9697	-40.1001	-22.583	-40.1001	-45.166	-40.1001	-49.4385	-40.1001	-40.2832	-40.0696	-31.7383	-40.1306	-50.6592	-40.1001	-40.8936	-40.1001	-42.1143	-40.1001	-59.2041	-40.1306
0.4005	-11.5967	-40.1306	-13.4277	-40.1001	-13.4277	-40.0696	-29.9072	-40.0696	-24.4141	-40.1001	-22.583	-40.1001	-48.8281	-40.1001	-73.2422	-40.1306	-51.8799	-40.1001	-61.6455	-40.1001	-31.1279	-40.0696	-54.9316	-40.1001	-35.4004	-40.1001	-51.8799	-40.1001	-39.6729	-40.1001	-43.9453	-40.0696	-48.8281	-40.1001	-45.166	-40.1001	-59.8145	-40.1001
0.401	-13.4277	-40.1001	-2.44141	-40.1001	-17.7002	-40.1001	-17.7002	-40.1306	-23.1934	-40.1001	-28.0762	-40.1001	-38.4521	-40.1306	-68.9697	-40.1001	-56.7627	-40.1001	-75.6836	-40.1001	-43.9453	-40.1001	-42.7246	-40.0696	-39.0625	-40.1001	-35.4004	-40.1001	-41.5039	-40.1001	-46.9971	-40.1001	-55.542	-40.1001	-39.6729	-40.1306	-54.9316	-40.0696
0.4015	-12.8174	-40.1001	-24.4141	-40.0696	-23.1934	-40.0696	-16.4795	-40.1001	-23.1934	-40.1001	-25.6348	-40.0696	-40.8936	-40.1001	-40.8936	-40.1001	-56.1523	-40.1001	-72.6318	-40.1001	-35.4004	-40.1001	-57.373	-40.1001	-38.4521	-40.0696	-36.6211	-40.0696	-48.2178	-40.1001	-39.6729	-40.1001	-48.2178	-40.1001	-41.5039	-40.1306	-54.3213	-40.1001
0.402	-12.8174	-40.1001	-25.6348	-40.0696	-22.583	-40.1001	-18.3105	-40.1001	-40.8936	-40.1001	-19.5313	-40.0696	-37.8418	-40.1306	-46.3867	-40.1001	-74.4629	-40.1001	-92.1631	-40.1306	-36.6211	-40.1306	-53.1006	-40.1306	-41.5039	-40.1001	-20.1416	-40.0696	-40.2832	-40.0696	-36.0107	-40.1001	-39.6729	-40.1001	-30.5176	-40.1001	-54.9316	-40.1306
0.4025	-15.2588	-40.1001	-15.2588	-40.1001	-17.0898	-40.1001	-18.9209	-40.1306	-34.1797	-40.1001	-21.3623	-40.1001	-26.2451	-40.1001	-51.8799	-40.1001	-57.9834	-40.1306	-65.918	-40.1001	-34.1797	-40.1001	-45.7764	-40.1306	-29.2969	-40.1001	-34.1797	-40.1001	-28.0762	-40.0696	-39.0625	-40.1001	-39.0625	-40.1001	-45.7764	-40.1001	-43.9453	-40.0696
0.403	-13.4277	-40.0696	-21.3623	-40.1306	-19.5313	-40.1611	-19.5313	-40.1306	-22.583	-40.1001	-16.4795	-40.1001	-36.0107	-40.1001	-67.749	-40.1001	-53.1006	-40.1001	-70.1904	-40.1001	-23.8037	-40.1001	-49.4385	-40.0696	-23.8037	-40.1001	-37.2314	-40.1306	-43.9453	-40.1001	-31.1279	-40.1306	-48.2178	-40.1001	-37.8418	-40.1001	-47.6074	-40.0696
0.4035	-29.2969	-40.1306	-25.0244	-40.0696	-21.9727	-40.1001	-20.752	-40.1306	-25.6348	-40.1001	-22.583	-40.1001	-36.0107	-40.1001	-73.2422	-40.1001	-64.0869	-40.1001	-57.373	-40.0696	-33.5693	-40.1001	-31.1279	-40.1001	-37.8418	-40.0696	-42.7246	-40.1306	-50.6592	-40.1001	-42.1143	-40.1001	-34.1797	-40.1001	-39.6729	-40.0696	-56.7627	-40.1001
0.404	-12.8174	-40.0696	-15.8691	-40.1001	-20.1416	-40.1001	-16.4795	-40.1001	-21.9727	-40.0696	-30.5176	-40.1001	-54.9316	-40.1001	-72.0215	-40.1001	-51.8799	-40.1001	-51.2695	-40.1306	-26.8555	-40.1001	-46.3867	-40.0696	-36.6211	-40.1001	-40.8936	-40.0696	-36.0107	-40.1001	-46.3867	-40.1001	-27.4658	-40.1001	-35.4004	-40.1001	-42.1143	-40.0696
0.4045	-7.93457	-40.1001	-28.0762	-40.1306	-15.8691	-40.1001	-9.15527	-40.1001	-31.7383	-40.1001	-8.54492	-40.0696	-32.959	-40.1001	-83.6182	-40.1001	-63.4766	-40.0696	-76.9043	-40.1306	-44.5557	-40.0696	-35.4004	-40.1001	-37.2314	-40.1306	-48.2178	-40.1001	-41.5039	-40.1001	-54.9316	-40.1306	-37.2314	-40.1001	-39.0625	-40.1001	-40.2832	-40.1001
0.405	0	-40.1001	-17.7002	-40.1001	-18.3105	-40.1306	-21.3623	-40.0696	-29.9072	-40.1001	-42.7246	-40.1001	-62.2559	-40.1001	-59.2041	-40.1001	-37.2314	-40.1001	-79.3457	-40.1001	-25.6348	-40.1001	-48.2178	-40.1001	-48.8281	-40.1001	-54.9316	-40.1001	-38.4521	-40.1001	-51.8799	-40.1306	-48.8281	-40.1001	-29.2969	-40.0696	-64.6973	-40.1001
0.4055	-12.207	-40.0696	-14.0381	-40.0696	-23.8037	-40.1001	-14.6484	-40.1001	-15.8691	-40.1306	-28.6865	-40.1001	-43.9453	-40.1001	-61.6455	-40.1001	-42.7246	-40.1001	-99.4873	-40.1306	-37.8418	-40.0696	-70.8008	-40.1001	-41.5039	-40.1306	-46.3867	-40.1001	-42.7246	-40.1001	-36.0107	-40.1001	-44.5557	-40.1001	-56.1523	-40.1001	-51.2695	-40.1001
0.406	-11.5967	-40.1001	-17.0898	-40.0696	-10.9863	-40.1306	-19.5313	-40.1001	-21.3623	-40.1001	-32.959	-40.0696	-48.8281	-40.1001	-67.749	-40.0696	-41.5039	-40.0696	-96.4355	-40.1306	-27.4658	-40.1001	-57.9834	-40.0696	-54.3213	-40.1001	-35.4004	-40.1001	-48.8281	-40.1001	-48.2178	-40.1001	-45.166	-40.1001	-41.5039	-40.1306	-56.7627	-40.1001
0.4065	-29.2969	-40.1001	-21.3623	-40.0696	-16.4795	-40.1001	-12.8174	-40.1001	-15.8691	-40.1001	-20.752	-40.1001	-42.1143	-40.0696	-61.0352	-40.0696	-38.4521	-40.1001	-108.643	-40.1001	-36.0107	-40.1001	-45.7764	-40.1306	-31.1279	-40.1001	-29.2969	-40.0696	-43.9453	-40.1001	-40.8936	-40.1306	-59.8145	-40.1611	-59.2041	-40.1001	-56.1523	-40.1001
0.407	-23.8037	-40.0696	-8.54492	-40.1001	-19.5313	-40.1001	-21.3623	-40.1001	-27.4658	-40.1001	-23.1934	-40.1306	-51.2695	-40.1001	-74.4629	-40.1001	-43.9453	-40.1306	-96.4355	-40.1306	-40.8936	-40.1001	-47.6074	-40.1001	-41.5039	-40.1001	-39.6729	-40.1001	-53.1006	-40.0696	-51.8799	-40.1001	-42.7246	-40.1306	-49.4385	-40.1001	-40.8936	-40.1001
0.4075	-22.583	-40.1001	-17.7002	-40.1001	-9.76563	-40.1306	-21.9727	-40.0696	-25.0244	-40.1001	-29.9072	-40.1001	-35.4004	-40.1001	-67.749	-40.1306	-29.9072	-40.1001	-106.812	-40.1306	-28.6865	-40.1001	-54.3213	-40.1001	-42.1143	-40.1001	-37.8418	-40.1306	-39.6729	-40.0696	-37.8418	-40.0696	-43.9453	-40.1001	-59.8145	-40.1306	-50.0488	-40.1001
0.408	-25.0244	-40.1306	-25.6348	-40.1001	-7.93457	-40.1306	-16.4795	-40.1306	-26.2451	-40.1001	-36.6211	-40.0696	-37.8418	-40.1001	-67.1387	-40.1001	-52.4902	-40.1001	-106.201	-40.1001	-19.5313	-40.1001	-43.9453	-40.1001	-60.4248	-40.0696	-28.6865	-40.1001	-50.0488	-40.0696	-41.5039	-40.1306	-44.5557	-40.1001	-40.2832	-40.0696	-44.5557	-40.1001
0.4085	-16.4795	-40.1611	-12.8174	-40.0696	-16.4795	-40.0696	-18.9209	-40.0696	-26.8555	-40.1001	-23.1934	-40.1001	-43.335	-40.1001	-61.0352	-40.1306	-37.8418	-40.1001	-72.0215	-40.1306	-36.6211	-40.1001	-51.2695	-40.1001	-59.2041	-40.0696	-32.959	-40.1306	-50.0488	-40.1001	-39.0625	-40.1001	-37.8418	-40.1306	-50.0488	-40.0696	-44.5557	-40.1001
0.409	-20.1416	-40.1001	-10.376	-40.1001	-7.93457	-40.1001	-20.752	-40.1001	-16.4795	-40.1001	-29.9072	-40.0696	-56.7627	-40.0696	-65.3076	-40.0696	-36.6211	-40.1306	-68.9697	-40.1001	-48.8281	-40.1001	-51.2695	-40.1001	-49.4385	-40.1001	-46.9971	-40.1306	-65.3076	-40.1306	-40.2832	-40.0696	-32.959	-40.1001	-37.2314	-40.1001	-43.9453	-40.1001
0.4095	-17.0898	-40.1001	-17.7002	-40.1001	-17.0898	-40.1001	-28.0762	-40.1001	-31.7383	-40.1001	-26.2451	-40.0696	-54.3213	-40.1001	-67.749	-40.1001	-43.9453	-40.1001	-75.6836	-40.1001	-34.1797	-40.1001	-48.2178	-40.1001	-43.9453	-40.0696	-36.6211	-40.1001	-53.7109	-40.1001	-32.959	-40.1306	-38.4521	-40.1001	-45.7764	-40.1001	-54.9316	-40.1001
0.41	-28.6865	-40.1001	-20.752	-40.0696	-7.32422	-40.1001	-24.4141	-40.1001	-21.3623	-40.1001	-23.1934	-40.1001	-53.1006	-40.1306	-79.3457	-40.1001	-43.9453	-40.1001	-68.3594	-40.1001	-39.6729	-40.1001	-39.6729	-40.1306	-40.8936	-40.1001	-39.6729	-40.0696	-59.2041	-40.1001	-48.8281	-40.1001	-50.6592	-40.1001	-39.6729	-40.1001	-46.3867	-40.1001
0.4105	-28.6865	-40.0696	-10.376	-40.1001	-12.207	-40.1001	-13.4277	-40.0696	-26.2451	-40.1306	-34.1797	-40.1306	-42.1143	-40.0696	-60.4248	-40.1306	-43.9453	-40.1306	-51.2695	-40.1001	-36.6211	-40.1001	-39.0625	-40.1001	-48.2178	-40.1001	-31.1279	-40.0696	-46.9971	-40.0696	-48.8281	-40.0696	-51.2695	-40.1306	-53.1006	-40.1611	-40.8936	-40.0696
0.411	-29.2969	-40.1001	-21.3623	-40.1001	-23.1934	-40.1611	-36.0107	-40.1001	-31.7383	-40.1001	-22.583	-40.1306	-54.3213	-40.0696	-40.8936	-40.1001	-49.4385	-40.1001	-53.7109	-40.1001	-42.7246	-40.1001	-49.4385	-40.1001	-46.9971	-40.0696	-40.8936	-40.0696	-56.1523	-40.1001	-29.2969	-40.1001	-56.1523	-40.1001	-33.5693	-40.1001	-39.6729	-40.1001
0.4115	-35.4004	-40.1001	-16.4795	-40.0696	-20.1416	-40.1001	-21.3623	-40.1001	-23.8037	-40.1001	-26.8555	-40.1001	-50.0488	-40.1001	-59.8145	-40.1001	-50.0488	-40.1001	-62.2559	-40.1001	-38.4521	-40.1306	-37.2314	-40.1001	-40.2832	-40.0696	-35.4004	-40.1001	-49.4385	-40.1001	-47.6074	-40.1001	-40.8936	-40.1001	-51.8799	-40.0696	-31.7383	-40.0696
0.412	-17.0898	-40.0696	-12.207	-40.1306	-15.2588	-40.1001	-18.3105	-40.1001	-29.9072	-40.0696	-26.8555	-40.1001	-34.1797	-40.1001	-68.9697	-40.1001	-48.8281	-40.1001	-53.7109	-40.1001	-34.1797	-40.1001	-26.8555	-40.1001	-47.6074	-40.1001	-40.2832	-40.1001	-57.373	-40.1001	-57.9834	-40.1306	-54.9316	-40.0696	-43.9453	-40.0696	-53.1006	-40.0696
0.4125	-26.2451	-40.1001	-5.49316	-40.1001	-15.2588	-40.1001	-35.4004	-40.1001	-23.8037	-40.0696	-32.959	-40.1001	-44.5557	-40.1001	-49.4385	-40.1001	-50.6592	-40.1001	-50.0488	-40.1001	-23.1934	-40.0696	-50.0488	-40.1001	-49.4385	-40.1306	-37.2314	-40.1001	-49.4385	-40.1001	-41.5039	-40.0696	-43.335	-40.1001	-40.8936	-40.1306	-32.959	-40.1001
0.413	-23.8037	-40.1001	-10.9863	-40.1001	-9.76563	-40.0696	-15.2588	-40.1001	-11.5967	-40.1001	-32.959	-40.0696	-31.7383	-40.0696	-70.1904	-40.0696	-59.8145	-40.1001	-54.9316	-40.1001	-35.4004	-40.1001	-48.2178	-40.1001	-59.8145	-40.1001	-53.7109	-40.0696	-59.8145	-40.1001	-48.2178	-40.1001	-46.3867	-40.1001	-59.2041	-40.1001	-40.2832	-40.0696
0.4135	-20.1416	-40.1306	-10.376	-40.1001	-11.5967	-40.0696	-27.4658	-40.0696	-19.5313	-40.1001	-17.7002	-40.1001	-42.1143	-40.1001	-64.0869	-40.1001	-62.8662	-40.1306	-48.2178	-40.1001	-44.5557	-40.1001	-43.9453	-40.0696	-39.0625	-40.1306	-40.8936	-40.1001	-62.8662	-40.0696	-45.7764	-40.1001	-36.6211	-40.1001	-26.8555	-40.1001	-73.8525	-40.1001
0.414	-28.6865	-40.1001	-7.93457	-40.1001	-20.1416	-40.0696	-19.5313	-40.0696	-23.8037	-40.1001	-32.3486	-40.1001	-50.0488	-40.1001	-73.2422	-40.1001	-42.7246	-40.1001	-59.8145	-40.0696	-30.5176	-40.1001	-40.8936	-40.1001	-33.5693	-40.1001	-33.5693	-40.1306	-42.7246	-40.1001	-61.6455	-40.0696	-43.9453	-40.1001	-43.9453	-40.1001	-37.8418	-40.0696
0.4145	-24.4141	-40.1001	-33.5693	-40.1001	-26.2451	-40.0696	-24.4141	-40.1001	-11.5967	-40.1306	-14.6484	-40.1001	-46.3867	-40.1306	-59.8145	-40.1306	-50.6592	-40.1001	-64.6973	-40.1001	-29.2969	-40.1306	-32.959	-40.1306	-39.6729	-40.1306	-31.7383	-40.1306	-46.3867	-40.1001	-50.6592	-40.0696	-42.1143	-40.1001	-43.9453	-40.1001	-53.1006	-40.1001
0.415	-18.9209	-40.1306	-21.3623	-40.1001	-15.2588	-40.1306	-22.583	-40.1001	-32.3486	-40.0696	-21.9727	-40.1306	-45.7764	-40.1001	-59.8145	-40.1001	-42.1143	-40.1001	-53.1006	-40.1001	-23.1934	-40.1001	-51.8799	-40.1001	-43.9453	-40.1001	-49.4385	-40.1001	-42.7246	-40.1001	-45.7764	-40.1001	-28.6865	-40.0696	-52.4902	-40.1001	-50.6592	-40.1001
0.4155	-20.752	-40.1306	-10.376	-40.1001	-6.10352	-40.0696	-17.7002	-40.1001	-40.8936	-40.1001	-34.79	-40.1001	-33.5693	-40.0696	-68.9697	-40.1001	-40.8936	-40.1001	-59.2041	-40.1001	-34.79	-40.1001	-32.959	-40.1001	-53.1006	-40.0696	-44.5557	-40.1001	-55.542	-40.1001	-55.542	-40.0696	-33.5693	-40.1001	-36.6211	-40.1306	-54.9316	-40.1306
0.416	-33.5693	-40.1001	-7.93457	-40.1001	-15.2588	-40.1001	-38.4521	-40.1001	-31.7383	-40.1306	-19.5313	-40.1001	-53.7109	-40.1001	-73.8525	-40.1001	-47.6074	-40.1001	-58.5938	-40.1001	-28.0762	-40.1001	-43.335	-40.1306	-44.5557	-40.1306	-39.0625	-40.1001	-50.6592	-40.1001	-44.5557	-40.1306	-39.0625	-40.1001	-36.6211	-40.1001	-53.1006	-40.1001
0.4165	-32.3486	-40.1001	-22.583	-40.1001	-18.3105	-40.1001	-22.583	-40.1306	-27.4658	-40.1306	-28.6865	-40.1001	-54.9316	-40.1306	-81.7871	-40.1306	-32.3486	-40.1001	-49.4385	-40.0696	-21.3623	-40.1001	-53.7109	-40.1001	-41.5039	-40.1001	-44.5557	-40.1306	-48.8281	-40.0696	-40.2832	-40.0696	-34.79	-40.0696	-46.3867	-40.1001	-42.1143	-40.1001
0.417	-27.4658	-40.1306	-25.6348	-40.1306	-20.752	-40.1001	-31.7383	-40.1001	-20.1416	-40.1001	-25.6348	-40.0696	-50.6592	-40.1001	-66.5283	-40.0696	-37.2314	-40.1306	-29.2969	-40.1001	-28.0762	-40.1001	-50.0488	-40.0696	-46.9971	-40.0696	-46.9971	-40.1001	-51.8799	-40.1001	-54.3213	-40.1001	-39.0625	-40.1001	-51.2695	-40.1001	-45.7764	-40.0696
0.4175	-44.5557	-40.1001	-12.207	-40.0696	-9.15527	-40.1001	-14.6484	-40.0696	-21.9727	-40.1001	-27.4658	-40.1001	-63.4766	-40.1001	-60.4248	-40.1001	-45.7764	-40.1306	-54.9316	-40.0696	-28.0762	-40.1001	-32.3486	-40.1001	-45.166	-40.1306	-48.8281	-40.1001	-48.2178	-40.0696	-64.0869	-40.1001	-40.2832	-40.1001	-51.8799	-40.0696	-43.9453	-40.1306
0.418	-49.4385	-40.1001	-29.2969	-40.1001	-16.4795	-40.1001	-18.3105	-40.1001	-25.6348	-40.1001	-28.0762	-40.1001	-45.7764	-40.1001	-45.166	-40.1001	-48.2178	-40.1306	-79.3457	-40.1001	-29.2969	-40.1306	-56.7627	-40.1001	-40.8936	-40.1001	-45.166	-40.1001	-49.4385	-40.1001	-39.0625	-40.0696	-49.4385	-40.1306	-48.8281	-40.1001	-47.6074	-40.1306
0.4185	-37.2314	-40.1306	-24.4141	-40.1306	-12.207	-40.1001	-36.0107	-40.1306	-24.4141	-40.1001	-26.8555	-40.1001	-39.0625	-40.1001	-60.4248	-40.1001	-35.4004	-40.1001	-78.7354	-40.1001	-40.2832	-40.1001	-43.335	-40.0696	-39.6729	-40.1001	-49.4385	-40.1001	-48.8281	-40.0696	-48.2178	-40.1001	-42.1143	-40.1001	-38.4521	-40.1001	-48.2178	-40.1001
0.419	-13.4277	-40.1001	-11.5967	-40.1001	-20.752	-40.1001	-23.1934	-40.1001	-10.9863	-40.1001	-18.3105	-40.1306	-41.5039	-40.0696	-46.3867	-40.1001	-44.5557	-40.0696	-53.7109	-40.1001	-20.1416	-40.1001	-51.2695	-40.1001	-46.3867	-40.1306	-40.8936	-40.1001	-47.6074	-40.1001	-42.1143	-40.1001	-46.9971	-40.1001	-34.1797	-40.1001	-49.4385	-40.1001
0.4195	-12.8174	-40.1001	-16.4795	-40.1001	-10.9863	-40.1001	-23.8037	-40.1001	-20.752	-40.1001	-24.4141	-40.1306	-49.4385	-40.0696	-72.6318	-40.1001	-51.8799	-40.1001	-73.8525	-40.1001	-30.5176	-40.1001	-37.8418	-40.1611	-36.6211	-40.1001	-55.542	-40.1001	-46.9971	-40.0696	-42.1143	-40.1001	-35.4004	-40.1001	-11.5967	-40.1001	-39.6729	-40.1001
0.42	-16.4795	-40.1001	-13.4277	-40.0696	-12.8174	-40.0696	-16.4795	-40.1001	-23.1934	-40.0696	-20.1416	-40.1001	-65.3076	-40.1001	-57.373	-40.1001	-59.2041	-40.1001	-68.9697	-40.1001	-39.6729	-40.0696	-61.6455	-40.1001	-38.4521	-40.1001	-44.5557	-40.1306	-42.1143	-40.1001	-37.2314	-40.0696	-45.166	-40.0696	-33.5693	-40.1001	-41.5039	-40.1001
0.4205	-19.5313	-40.1001	-18.3105	-40.1001	-18.9209	-40.1001	-18.9209	-40.1001	-31.7383	-40.0696	-32.959	-40.0696	-56.1523	-40.0696	-78.125	-40.1001	-47.6074	-40.0696	-73.8525	-40.1001	-40.2832	-40.1001	-48.2178	-40.0696	-36.6211	-40.1001	-47.6074	-40.1001	-46.3867	-40.1306	-38.4521	-40.0696	-46.9971	-40.1001	-32.3486	-40.1001	-48.8281	-40.1001
0.421	-31.7383	-40.1001	-25.6348	-40.1001	-17.7002	-40.0696	-21.9727	-40.0696	-30.5176	-40.1001	-34.1797	-40.1001	-58.5938	-40.1001	-76.2939	-40.1001	-40.8936	-40.1001	-68.9697	-40.1001	-50.6592	-40.0696	-55.542	-40.1001	-49.4385	-40.1001	-57.373	-40.1001	-53.7109	-40.1001	-34.79	-40.0696	-36.6211	-40.1306	-40.8936	-40.0696	-47.6074	-40.1001
0.4215	-17.0898	-40.1001	-32.3486	-40.1001	-6.71387	-40.0696	-18.9209	-40.0696	-15.2588	-40.1001	-14.0381	-40.0696	-34.79	-40.1001	-57.373	-40.1001	-45.166	-40.1306	-70.8008	-40.1306	-37.8418	-40.0696	-53.7109	-40.0696	-57.373	-40.1001	-46.3867	-40.1306	-51.2695	-40.1001	-39.6729	-40.0696	-40.2832	-40.1001	-35.4004	-40.1306	-43.335	-40.1306
0.422	-15.2588	-40.0696	-31.1279	-40.1001	-10.376	-40.1306	-20.1416	-40.0696	-24.4141	-40.1306	-12.8174	-40.0696	-50.6592	-40.1001	-70.8008	-40.0696	-31.7383	-40.1001	-72.0215	-40.1001	-37.2314	-40.1001	-47.6074	-40.1001	-25.6348	-40.0696	-44.5557	-40.1001	-38.4521	-40.1001	-37.8418	-40.1001	-48.8281	-40.1001	-44.5557	-40.1001	-53.1006	-40.1001
0.4225	-28.6865	-40.1001	-26.2451	-40.1001	-23.1934	-40.1001	-14.0381	-40.0696	-26.2451	-40.1001	-19.5313	-40.1001	-40.2832	-40.1001	-76.9043	-40.1001	-54.9316	-40.1306	-60.4248	-40.1001	-31.1279	-40.1306	-56.1523	-40.0696	-32.3486	-40.0696	-45.166	-40.1001	-56.1523	-40.1001	-37.2314	-40.1306	-37.8418	-40.1001	-42.7246	-40.1001	-53.1006	-40.1306
0.423	-23.8037	-40.1001	-7.32422	-40.1001	-20.1416	-40.1001	-23.8037	-40.0696	-19.5313	-40.1001	-22.583	-40.1306	-52.4902	-40.1001	-76.2939	-40.1001	-45.166	-40.1306	-88.501	-40.1001	-31.1279	-40.1001	-44.5557	-40.1001	-32.3486	-40.1001	-48.2178	-40.1306	-44.5557	-40.1001	-43.335	-40.1001	-49.4385	-40.1306	-36.0107	-40.1306	-53.7109	-40.0696
0.4235	-4.27246	-40.1306	-15.8691	-40.1001	-12.8174	-40.1306	-20.1416	-40.1001	-32.3486	-40.1001	-31.1279	-40.1001	-43.335	-40.0696	-77.5146	-40.0696	-45.166	-40.1001	-72.6318	-40.1001	-50.6592	-40.1001	-45.7764	-40.1001	-40.2832	-40.1001	-34.1797	-40.1001	-59.8145	-40.1001	-45.7764	-40.0696	-57.373	-40.0696	-37.2314	-40.1001	-42.7246	-40.1001
0.424	-18.9209	-40.1001	-11.5967	-40.1001	-12.8174	-40.1001	-28.0762	-40.1611	-28.0762	-40.1001	-22.583	-40.1001	-50.0488	-40.1001	-70.1904	-40.1001	-46.3867	-40.1001	-70.1904	-40.1001	-34.79	-40.0696	-60.4248	-40.1001	-38.4521	-40.0696	-46.3867	-40.1001	-46.9971	-40.1306	-37.2314	-40.1001	-42.1143	-40.1001	-53.7109	-40.0696	-41.5039	-40.1001
0.4245	-21.3623	-40.0696	-21.3623	-40.1001	-18.9209	-40.1001	-26.2451	-40.1001	-26.8555	-40.1001	-18.3105	-40.0696	-50.0488	-40.0696	-82.3975	-40.1306	-41.5039	-40.1001	-73.8525	-40.1306	-40.8936	-40.1001	-49.4385	-40.1001	-32.959	-40.1001	-36.0107	-40.1306	-54.9316	-40.1001	-40.2832	-40.0696	-45.7764	-40.1001	-27.4658	-40.0696	-43.9453	-40.0696
0.425	-17.0898	-40.0696	-26.2451	-40.1306	-15.2588	-40.1001	-34.79	-40.1001	-30.5176	-40.1001	-28.0762	-40.1001	-37.2314	-40.1001	-65.3076	-40.0696	-45.166	-40.1306	-76.2939	-40.0696	-45.7764	-40.1001	-52.4902	-40.1001	-45.7764	-40.1001	-42.1143	-40.1306	-53.7109	-40.1001	-46.9971	-40.0696	-54.3213	-40.1001	-42.1143	-40.1001	-52.4902	-40.1001
0.4255	-16.4795	-40.1001	-21.3623	-40.1001	-21.3623	-40.0696	-29.9072	-40.1001	-8.54492	-40.1001	-25.0244	-40.1001	-48.2178	-40.1001	-80.5664	-40.1001	-29.2969	-40.1001	-81.1768	-40.1001	-33.5693	-40.1001	-52.4902	-40.1001	-36.6211	-40.1001	-38.4521	-40.1001	-62.2559	-40.1001	-26.8555	-40.1001	-42.1143	-40.1306	-50.6592	-40.1001	-45.7764	-40.0696
0.426	-14.0381	-40.1001	-15.8691	-40.1306	-14.6484	-40.1001	-28.0762	-40.1001	-11.5967	-40.1001	-25.0244	-40.1001	-37.2314	-40.1001	-71.4111	-40.1001	-45.7764	-40.1001	-87.8906	-40.1001	-43.335	-40.1001	-59.8145	-40.1001	-50.0488	-40.1001	-23.8037	-40.1001	-61.6455	-40.0696	-36.6211	-40.0696	-40.2832	-40.0696	-25.6348	-40.1001	-51.8799	-40.1306
0.4265	-2.44141	-40.0696	-6.10352	-40.1001	-11.5967	-40.1001	-31.1279	-40.0696	-21.3623	-40.0696	-21.9727	-40.0696	-49.4385	-40.0696	-50.0488	-40.1001	-39.0625	-40.1001	-81.1768	-40.1001	-37.8418	-40.1001	-43.335	-40.1306	-46.3867	-40.1001	-34.1797	-40.1001	-67.1387	-40.0696	-50.0488	-40.1001	-28.0762	-40.1001	-42.7246	-40.1001	-32.3486	-40.1001
0.427	-6.10352	-40.1001	-7.93457	-40.1001	-14.0381	-40.1306	-20.1416	-40.1001	-26.2451	-40.1001	-26.8555	-40.1306	-45.7764	-40.1001	-63.4766	-40.1306	-46.9971	-40.0391	-77.5146	-40.1001	-41.5039	-40.0696	-45.166	-40.1001	-36.6211	-40.1001	-42.7246	-40.1001	-57.373	-40.0696	-50.0488	-40.0696	-34.1797	-40.1306	-40.2832	-40.1001	-42.1143	-40.1306
0.4275	-24.4141	-40.1001	-21.9727	-40.1001	-23.1934	-40.1306	-9.15527	-40.1001	-19.5313	-40.1001	-25.6348	-40.1001	-45.166	-40.1001	-84.2285	-40.1306	-48.2178	-40.1001	-83.6182	-40.1001	-39.6729	-40.1001	-56.7627	-40.1611	-49.4385	-40.1001	-36.0107	-40.1001	-61.0352	-40.0696	-31.7383	-40.1001	-31.1279	-40.1001	-40.8936	-40.1001	-34.79	-40.1001
0.428	-28.0762	-40.1001	-21.9727	-40.1001	-20.752	-40.1306	-14.6484	-40.1001	-21.3623	-40.1001	-36.0107	-40.1001	-37.8418	-40.0696	-71.4111	-40.1001	-47.6074	-40.0696	-90.332	-40.1001	-15.8691	-40.1001	-46.3867	-40.1001	-33.5693	-40.1001	-39.6729	-40.1001	-67.749	-40.0696	-43.9453	-40.1001	-45.7764	-40.1001	-42.1143	-40.1001	-51.8799	-40.1001
0.4285	-15.2588	-40.1306	-23.8037	-40.0696	-25.0244	-40.1001	-5.49316	-40.1306	-20.752	-40.0696	-25.0244	-40.1306	-30.5176	-40.1001	-51.8799	-40.0696	-51.8799	-40.0696	-63.4766	-40.1001	-54.3213	-40.1001	-44.5557	-40.1001	-43.335	-40.1001	-40.2832	-40.1001	-50.6592	-40.1001	-42.1143	-40.1001	-37.2314	-40.1306	-40.2832	-40.1001	-65.918	-40.1001
0.429	-7.93457	-40.1001	-23.1934	-40.1001	-9.76563	-40.1001	-21.3623	-40.0696	-26.8555	-40.1306	-22.583	-40.1001	-30.5176	-40.1001	-82.3975	-40.1001	-39.0625	-40.1306	-62.2559	-40.1001	-24.4141	-40.0696	-23.1934	-40.1001	-50.6592	-40.1306	-48.2178	-40.1001	-52.4902	-40.1001	-38.4521	-40.1001	-36.6211	-40.1306	-50.0488	-40.1001	-53.7109	-40.1001
0.4295	-18.9209	-40.1001	-14.6484	-40.1001	-15.8691	-40.1001	-22.583	-40.1001	-25.0244	-40.1001	-27.4658	-40.1001	-39.6729	-40.0696	-63.4766	-40.1001	-38.4521	-40.1001	-84.2285	-40.1001	-28.6865	-40.1001	-32.3486	-40.0696	-59.2041	-40.1001	-57.373	-40.0391	-43.335	-40.1001	-34.1797	-40.0696	-28.6865	-40.1001	-40.8936	-40.1306	-43.335	-40.1001
0.43	-16.4795	-40.1001	-8.54492	-40.1001	-28.0762	-40.1306	-21.3623	-40.1001	-28.0762	-40.1306	-32.959	-40.0696	-45.166	-40.1306	-70.8008	-40.1001	-38.4521	-40.1001	-81.7871	-40.1001	-28.0762	-40.1001	-37.8418	-40.1001	-48.8281	-40.1001	-40.8936	-40.0696	-50.0488	-40.1001	-53.1006	-40.0696	-46.3867	-40.1001	-43.335	-40.1001	-45.7764	-40.1001
0.4305	-25.0244	-40.0696	-10.9863	-40.1001	-20.1416	-40.1306	-5.49316	-40.0696	-25.0244	-40.1001	-28.0762	-40.1001	-28.6865	-40.1306	-58.5938	-40.1306	-43.9453	-40.1306	-66.5283	-40.1001	-37.2314	-40.1306	-49.4385	-40.1306	-63.4766	-40.0696	-24.4141	-40.1001	-51.8799	-40.1001	-37.2314	-40.1306	-32.3486	-40.1001	-42.7246	-40.1306	-34.79	-40.1001
0.431	-21.9727	-40.0696	-20.1416	-40.1001	-14.0381	-40.1306	-19.5313	-40.1001	-25.6348	-40.1001	-35.4004	-40.1001	-37.2314	-40.0696	-65.918	-40.1001	-30.5176	-40.1001	-61.6455	-40.1306	-31.1279	-40.1306	-48.2178	-40.0696	-53.7109	-40.0696	-34.1797	-40.1001	-48.2178	-40.0696	-35.4004	-40.0696	-32.959	-40.1001	-46.9971	-40.1001	-35.4004	-40.1306
0.4315	-19.5313	-40.1001	-28.6865	-40.1001	-18.9209	-40.1001	-22.583	-40.0696	-36.0107	-40.1001	-28.0762	-40.1306	-16.4795	-40.1001	-67.1387	-40.1306	-26.8555	-40.1001	-67.1387	-40.1001	-39.6729	-40.0696	-45.7764	-40.1001	-50.6592	-40.1001	-35.4004	-40.1001	-39.6729	-40.1306	-57.373	-40.1306	-32.959	-40.0696	-38.4521	-40.1001	-36.0107	-40.1306
0.432	-26.2451	-40.1001	-2.44141	-40.1001	-14.0381	-40.1306	-14.6484	-40.1001	-36.6211	-40.1001	-22.583	-40.1001	-34.1797	-40.0696	-46.3867	-40.1306	-39.0625	-40.0696	-83.6182	-40.1306	-41.5039	-40.0696	-43.9453	-40.1001	-51.8799	-40.0696	-37.8418	-40.1001	-42.7246	-40.1001	-50.0488	-40.1001	-42.1143	-40.1001	-41.5039	-40.1001	-56.1523	-40.0696
0.4325	-13.4277	-40.1001	-5.49316	-40.0696	-20.1416	-40.1001	-18.9209	-40.1001	-27.4658	-40.1001	-32.959	-40.1001	-32.959	-40.1001	-57.9834	-40.1001	-50.6592	-40.1001	-59.8145	-40.1306	-31.1279	-40.0696	-51.2695	-40.1001	-53.7109	-40.1306	-29.2969	-40.0696	-53.1006	-40.1001	-45.7764	-40.1001	-21.9727	-40.1001	-25.0244	-40.1001	-37.8418	-40.1001
0.433	-7.32422	-40.1001	-31.1279	-40.1001	-25.0244	-40.1306	-22.583	-40.0696	-28.0762	-40.0696	-22.583	-40.1001	-32.3486	-40.0696	-61.6455	-40.1001	-41.5039	-40.1001	-51.2695	-40.0696	-35.4004	-40.0696	-42.7246	-40.1001	-43.9453	-40.1001	-46.3867	-40.1001	-44.5557	-40.1001	-38.4521	-40.1001	-36.0107	-40.1001	-54.3213	-40.1306	-54.9316	-40.0696
0.4335	-3.66211	-40.1001	-8.54492	-40.1001	-17.0898	-40.1306	-21.3623	-40.1001	-21.3623	-40.1001	-29.2969	-40.1001	-36.0107	-40.1001	-51.8799	-40.1001	-46.3867	-40.1001	-56.7627	-40.0696	-34.79	-40.1001	-54.9316	-40.1001	-54.9316	-40.0696	-40.8936	-40.1001	-59.2041	-40.0696	-41.5039	-40.0696	-35.4004	-40.1001	-46.9971	-40.1611	-60.4248	-40.1001
0.434	-10.376	-40.1001	-27.4658	-40.1001	-0.610352	-40.0696	-23.1934	-40.1001	-22.583	-40.1306	-21.9727	-40.1001	-41.5039	-40.0696	-45.7764	-40.1001	-51.8799	-40.1306	-72.6318	-40.1001	-37.8418	-40.1001	-51.8799	-40.1001	-47.6074	-40.1306	-34.79	-40.1001	-50.6592	-40.1001	-35.4004	-40.1001	-37.2314	-40.0696	-38.4521	-40.1306	-42.7246	-40.0696
0.4345	-8.54492	-40.1001	-25.6348	-40.1001	-14.6484	-40.1001	-24.4141	-40.1001	-31.7383	-40.1001	-37.2314	-40.1001	-48.8281	-40.0696	-53.7109	-40.1306	-36.6211	-40.1001	-61.6455	-40.0696	-29.9072	-40.1001	-46.9971	-40.1001	-55.542	-40.1001	-32.3486	-40.1001	-48.2178	-40.0696	-51.2695	-40.1306	-40.2832	-40.1001	-46.9971	-40.1306	-57.9834	-40.1306
0.435	-9.76563	-40.0696	-12.8174	-40.1306	-14.6484	-40.1001	-17.0898	-40.1001	-18.3105	-40.0696	-28.0762	-40.1306	-54.3213	-40.1001	-62.8662	-40.0696	-42.1143	-40.1306	-65.3076	-40.1001	-33.5693	-40.1001	-51.8799	-40.1001	-42.7246	-40.0696	-53.7109	-40.1001	-42.1143	-40.1001	-58.5938	-40.0696	-45.166	-40.1001	-57.9834	-40.1001	-50.0488	-40.0696
0.4355	-13.4277	-40.1001	-14.6484	-40.1001	-4.88281	-40.1306	-15.2588	-40.1001	-36.6211	-40.1001	-31.1279	-40.1306	-48.8281	-40.1306	-55.542	-40.1001	-65.3076	-40.1001	-88.501	-40.1001	-40.2832	-40.1001	-48.2178	-40.0696	-41.5039	-40.1001	-42.1143	-40.1306	-45.166	-40.1001	-37.2314	-40.0696	-39.6729	-40.1001	-37.2314	-40.0696	-61.0352	-40.1306
0.436	-10.9863	-40.1001	-23.1934	-40.1001	0.610352	-40.1001	-12.207	-40.1001	-15.8691	-40.1001	-23.1934	-40.0696	-39.0625	-40.1001	-74.4629	-40.1001	-52.4902	-40.0696	-67.749	-40.1001	-39.0625	-40.1306	-38.4521	-40.1001	-53.1006	-40.0696	-48.2178	-40.1001	-45.7764	-40.1001	-46.9971	-40.1001	-29.2969	-40.0696	-25.6348	-40.1306	-37.2314	-40.1001
0.4365	-20.1416	-40.1001	-14.0381	-40.1001	-19.5313	-40.1001	-18.3105	-40.0696	-21.3623	-40.1001	-17.0898	-40.1001	-56.1523	-40.1001	-53.7109	-40.1001	-78.125	-40.1001	-80.5664	-40.1001	-36.0107	-40.1001	-69.5801	-40.1001	-31.7383	-40.1306	-49.4385	-40.1001	-45.7764	-40.1001	-42.7246	-40.1306	-33.5693	-40.1001	-37.8418	-40.1001	-54.3213	-40.1001
0.437	-7.93457	-40.1001	-17.7002	-40.0696	-4.88281	-40.0696	-18.9209	-40.1001	-15.8691	-40.0696	-31.7383	-40.0696	-34.1797	-40.1001	-84.2285	-40.0696	-65.3076	-40.1001	-70.8008	-40.1001	-42.1143	-40.1001	-50.6592	-40.1001	-42.7246	-40.1001	-42.7246	-40.1306	-62.2559	-40.1306	-52.4902	-40.1001	-38.4521	-40.1001	-39.6729	-40.1001	-54.9316	-40.1001
0.4375	-17.7002	-40.0696	-15.2588	-40.1001	-7.93457	-40.1001	-14.6484	-40.1001	-32.3486	-40.1001	-27.4658	-40.1001	-51.8799	-40.1001	-78.7354	-40.1001	-62.2559	-40.1001	-72.0215	-40.1306	-42.1143	-40.1001	-48.8281	-40.0391	-45.166	-40.1001	-51.8799	-40.0696	-56.1523	-40.1001	-45.166	-40.1001	-34.1797	-40.0696	-18.3105	-40.1001	-59.8145	-40.0696
0.438	-14.6484	-40.0696	-21.9727	-40.1001	-23.1934	-40.1306	-21.9727	-40.0696	-28.6865	-40.1306	-23.8037	-40.1001	-50.0488	-40.1001	-75.0732	-40.0696	-65.918	-40.1306	-68.3594	-40.1001	-37.2314	-40.0696	-50.0488	-40.1001	-45.166	-40.1001	-45.166	-40.1306	-52.4902	-40.1306	-54.9316	-40.1001	-46.3867	-40.1001	-40.2832	-40.1001	-44.5557	-40.1306
0.4385	-12.8174	-40.1001	-23.1934	-40.1306	-16.4795	-40.1306	-21.3623	-40.1001	-29.9072	-40.0696	-18.3105	-40.1306	-54.3213	-40.1001	-82.3975	-40.1001	-41.5039	-40.1001	-86.0596	-40.1001	-42.1143	-40.1001	-54.3213	-40.1611	-54.3213	-40.1306	-51.2695	-40.1001	-53.7109	-40.0696	-56.1523	-40.1001	-40.8936	-40.0391	-33.5693	-40.1001	-49.4385	-40.1001
0.439	-13.4277	-40.0696	-31.7383	-40.0696	-18.9209	-40.1306	-23.8037	-40.1306	-29.2969	-40.0696	-24.4141	-40.0696	-43.9453	-40.1001	-82.3975	-40.0696	-50.6592	-40.1306	-75.0732	-40.1306	-37.2314	-40.1001	-46.3867	-40.1001	-41.5039	-40.1001	-38.4521	-40.1001	-50.6592	-40.0696	-44.5557	-40.1001	-40.2832	-40.0696	-20.1416	-40.1001	-56.7627	-40.1001
0.4395	-17.0898	-40.0696	-19.5313	-40.1001	-15.2588	-40.1001	-34.79	-40.1001	-26.8555	-40.1001	-28.6865	-40.1001	-43.9453	-40.1001	-65.3076	-40.1001	-49.4385	-40.0696	-79.3457	-40.1001	-46.9971	-40.1001	-42.1143	-40.1001	-54.3213	-40.1001	-37.8418	-40.1001	-52.4902	-40.1001	-40.2832	-40.0696	-46.3867	-40.1001	-34.1797	-40.1001	-59.8145	-40.1001
0.44	-9.15527	-40.1001	-9.15527	-40.1001	-18.9209	-40.1001	-24.4141	-40.1001	-12.8174	-40.1001	-39.6729	-40.1001	-41.5039	-40.1001	-73.8525	-40.0696	-56.7627	-40.1306	-79.9561	-40.0696	-37.8418	-40.1001	-41.5039	-40.1001	-51.2695	-40.1001	-43.9453	-40.1001	-49.4385	-40.1001	-32.3486	-40.1306	-42.7246	-40.1001	-37.8418	-40.0696	-47.6074	-40.0696
0.4405	-15.8691	-40.1306	-15.2588	-40.1306	-17.0898	-40.0696	-17.0898	-40.1001	-24.4141	-40.1001	-14.0381	-40.1001	-42.7246	-40.1001	-48.2178	-40.1001	-52.4902	-40.0696	-68.9697	-40.1001	-40.8936	-40.1001	-53.1006	-40.1001	-37.2314	-40.1001	-40.2832	-40.1001	-49.4385	-40.1001	-39.6729	-40.1001	-43.335	-40.1001	-34.1797	-40.1306	-56.1523	-40.1001
0.441	-6.71387	-40.0696	-13.4277	-40.1001	-7.32422	-40.1306	-26.8555	-40.1001	-31.7383	-40.1001	-18.9209	-40.0696	-39.6729	-40.1001	-65.3076	-40.1001	-44.5557	-40.1306	-55.542	-40.1001	-42.7246	-40.0696	-57.373	-40.1001	-40.2832	-40.1001	-37.2314	-40.1001	-44.5557	-40.1001	-38.4521	-40.1001	-43.9453	-40.1001	-43.335	-40.1001	-54.3213	-40.1001
0.4415	-7.93457	-40.0696	-24.4141	-40.1001	-0.610352	-40.0696	-5.49316	-40.0696	-40.8936	-40.1001	-25.6348	-40.0696	-44.5557	-40.1001	-55.542	-40.1001	-56.1523	-40.0696	-65.918	-40.1001	-31.7383	-40.1001	-54.3213	-40.1001	-31.1279	-40.0696	-45.7764	-40.1001	-43.335	-40.1306	-36.6211	-40.1001	-40.2832	-40.1001	-41.5039	-40.1001	-54.9316	-40.1001
0.442	-9.76563	-40.0696	-14.6484	-40.0696	-4.88281	-40.1001	-22.583	-40.0696	-20.1416	-40.1001	-29.9072	-40.0696	-34.79	-40.0696	-64.0869	-40.1306	-48.2178	-40.1001	-84.8389	-40.1001	-41.5039	-40.1306	-42.1143	-40.1001	-33.5693	-40.1001	-37.2314	-40.0696	-39.6729	-40.1001	-36.6211	-40.0696	-46.3867	-40.1306	-37.8418	-40.1306	-54.9316	-40.0696
0.4425	-3.05176	-40.1001	-28.0762	-40.1306	-18.3105	-40.1001	-15.2588	-40.1001	-23.1934	-40.1001	-21.3623	-40.1001	-34.1797	-40.1001	-62.2559	-40.0696	-42.7246	-40.1001	-52.4902	-40.0696	-43.335	-40.1306	-62.2559	-40.1001	-39.0625	-40.0696	-40.8936	-40.1001	-62.8662	-40.1001	-41.5039	-40.1001	-49.4385	-40.0696	-44.5557	-40.1306	-59.8145	-40.1001
0.443	-5.49316	-40.1306	-16.4795	-40.1001	-22.583	-40.1001	-15.2588	-40.0696	-26.8555	-40.1001	-36.0107	-40.0696	-32.959	-40.1306	-59.8145	-40.1306	-43.335	-40.1001	-65.918	-40.1001	-40.2832	-40.1306	-48.2178	-40.1001	-40.8936	-40.1001	-33.5693	-40.0696	-66.5283	-40.1001	-51.8799	-40.1001	-38.4521	-40.1001	-38.4521	-40.0696	-50.6592	-40.1306
0.4435	-10.376	-40.1001	-17.0898	-40.0696	-6.71387	-40.1001	-15.2588	-40.1306	-19.5313	-40.0696	-17.7002	-40.1306	-42.7246	-40.0696	-65.918	-40.1001	-48.8281	-40.1001	-65.918	-40.1306	-38.4521	-40.1001	-43.9453	-40.1306	-52.4902	-40.1001	-39.0625	-40.0696	-47.6074	-40.1306	-37.2314	-40.1001	-40.2832	-40.1001	-38.4521	-40.1001	-51.8799	-40.1306
0.444	4.27246	-40.1001	-21.9727	-40.1001	-10.9863	-40.1306	-12.8174	-40.1306	-32.3486	-40.1001	-28.6865	-40.1001	-43.335	-40.1306	-64.6973	-40.1001	-38.4521	-40.1001	-79.9561	-40.1001	-39.6729	-40.1001	-40.2832	-40.1001	-28.0762	-40.1001	-35.4004	-40.0696	-50.6592	-40.1306	-34.79	-40.1001	-37.8418	-40.0696	-43.335	-40.1001	-46.9971	-40.0696
0.4445	-19.5313	-40.1306	-40.2832	-40.1001	-15.2588	-40.1001	-8.54492	-40.1001	-38.4521	-40.1001	-26.2451	-40.1001	-39.6729	-40.1001	-62.8662	-40.1306	-42.7246	-40.0696	-91.5527	-40.1001	-41.5039	-40.0696	-44.5557	-40.1001	-42.7246	-40.1001	-46.3867	-40.0696	-49.4385	-40.1001	-28.0762	-40.1001	-43.9453	-40.1306	-30.5176	-40.1001	-50.6592	-40.1001
0.445	-20.1416	-40.1001	-12.207	-40.0696	-6.10352	-40.1001	-16.4795	-40.1306	-33.5693	-40.1001	-36.6211	-40.1001	-39.6729	-40.1001	-64.6973	-40.1001	-62.8662	-40.1001	-80.5664	-40.1001	-46.3867	-40.1001	-55.542	-40.1306	-47.6074	-40.0696	-32.3486	-40.1001	-43.335	-40.1306	-24.4141	-40.1001	-39.6729	-40.1001	-44.5557	-40.1001	-61.6455	-40.0696
0.4455	-1.2207	-40.0696	-12.207	-40.1001	-11.5967	-40.1306	-7.93457	-40.1001	-17.7002	-40.1306	-36.6211	-40.1001	-37.8418	-40.1001	-66.5283	-40.1001	-44.5557	-40.1001	-86.0596	-40.1001	-36.0107	-40.0696	-42.1143	-40.0696	-27.4658	-40.1306	-29.2969	-40.1001	-46.9971	-40.1001	-43.335	-40.1001	-48.8281	-40.1001	-54.3213	-40.1001	-54.9316	-40.1001
0.446	-1.83105	-40.0696	-12.8174	-40.1306	-28.0762	-40.1306	-25.0244	-40.1001	-49.4385	-40.1001	-21.3623	-40.1001	-27.4658	-40.1001	-68.9697	-40.0696	-39.0625	-40.1001	-100.708	-40.1001	-45.7764	-40.1001	-62.8662	-40.1001	-43.9453	-40.0696	-32.3486	-40.0696	-43.9453	-40.1001	-41.5039	-40.1001	-43.9453	-40.1001	-42.7246	-40.1001	-49.4385	-40.1306
0.4465	-9.15527	-40.1001	-12.8174	-40.1001	-12.207	-40.1001	-10.9863	-40.1306	-21.9727	-40.1001	-24.4141	-40.1001	-34.79	-40.1001	-77.5146	-40.1001	-45.7764	-40.1306	-88.501	-40.1001	-39.0625	-40.0696	-46.9971	-40.1001	-37.2314	-40.1001	-36.0107	-40.1001	-36.6211	-40.0696	-32.959	-40.0696	-45.166	-40.1611	-43.335	-40.1001	-54.3213	-40.1001
0.447	-17.7002	-40.0696	-18.9209	-40.1306	-10.376	-40.1001	-17.0898	-40.0696	-30.5176	-40.1001	-31.1279	-40.1001	-40.8936	-40.1306	-83.6182	-40.1001	-49.4385	-40.1306	-98.2666	-40.1001	-28.6865	-40.1306	-49.4385	-40.1306	-43.335	-40.1306	-31.1279	-40.1001	-42.1143	-40.1001	-32.3486	-40.0696	-46.9971	-40.1306	-48.2178	-40.1001	-69.5801	-40.1001
0.4475	-25.6348	-40.1306	-15.2588	-40.1001	-10.376	-40.1306	-1.83105	-40.1306	-18.9209	-40.1001	-41.5039	-40.1001	-41.5039	-40.1001	-68.9697	-40.1001	-42.7246	-40.0696	-76.2939	-40.1001	-41.5039	-40.1001	-47.6074	-40.1306	-34.1797	-40.0696	-39.0625	-40.1306	-43.9453	-40.1001	-35.4004	-40.0696	-49.4385	-40.1001	-45.7764	-40.1001	-53.7109	-40.1001
0.448	-16.4795	-40.0696	-18.3105	-40.1306	-24.4141	-40.0696	-9.76563	-40.1001	-25.0244	-40.0696	-25.0244	-40.1001	-36.0107	-40.1001	-68.9697	-40.1306	-51.8799	-40.1001	-95.2148	-40.1001	-40.2832	-40.1001	-56.1523	-40.1001	-33.5693	-40.1001	-34.79	-40.1001	-50.0488	-40.1001	-43.9453	-40.1001	-42.7246	-40.1001	-47.6074	-40.1001	-44.5557	-40.1001
0.4485	-10.376	-40.0696	-20.1416	-40.1001	-8.54492	-40.1001	-13.4277	-40.1001	-42.1143	-40.1001	-34.79	-40.1001	-45.7764	-40.1001	-71.4111	-40.1306	-36.0107	-40.1001	-85.4492	-40.1001	-47.6074	-40.1001	-54.9316	-40.0696	-31.1279	-40.1306	-23.8037	-40.1001	-57.9834	-40.1001	-48.2178	-40.1001	-33.5693	-40.0696	-36.6211	-40.1001	-42.7246	-40.1001
0.449	-9.15527	-40.1001	-16.4795	-40.0696	-22.583	-40.1306	-21.9727	-40.0696	-26.8555	-40.1001	-37.2314	-40.1001	-52.4902	-40.1001	-74.4629	-40.1001	-24.4141	-40.1001	-76.2939	-40.1001	-46.3867	-40.0696	-49.4385	-40.1001	-40.8936	-40.1306	-36.6211	-40.1001	-50.6592	-40.1306	-45.166	-40.1001	-33.5693	-40.1001	-48.2178	-40.1001	-46.9971	-40.1001
0.4495	-26.2451	-40.1001	-22.583	-40.0696	-26.2451	-40.1001	-17.0898	-40.1306	-24.4141	-40.1001	-28.0762	-40.1001	-57.373	-40.1001	-72.0215	-40.1001	-46.9971	-40.0696	-78.7354	-40.0696	-34.79	-40.1001	-50.0488	-40.1001	-36.6211	-40.1001	-28.6865	-40.1001	-44.5557	-40.1001	-64.0869	-40.1306	-46.3867	-40.1001	-50.6592	-40.1001	-45.7764	-40.0696
0.45	-28.0762	-40.1001	-17.7002	-40.1001	-14.6484	-40.1001	-7.93457	-40.0696	-25.0244	-40.0696	-36.0107	-40.0696	-45.7764	-40.0391	-68.9697	-40.1001	-45.7764	-40.1001	-93.3838	-40.1001	-29.2969	-40.1001	-56.7627	-40.1306	-45.166	-40.1001	-35.4004	-40.1001	-51.8799	-40.1001	-36.6211	-40.0696	-41.5039	-40.1001	-53.1006	-40.1001	-45.7764	-40.0696
0.4505	-10.9863	-40.1001	-20.1416	-40.1001	-24.4141	-40.1306	-19.5313	-40.1001	-20.1416	-40.0696	-37.8418	-40.1001	-34.79	-40.1001	-62.8662	-40.1001	-42.7246	-40.1001	-85.4492	-40.1001	-39.0625	-40.1306	-61.0352	-40.0696	-56.1523	-40.1001	-32.959	-40.0696	-40.2832	-40.1001	-43.335	-40.1001	-41.5039	-40.0696	-43.9453	-40.0696	-43.335	-40.1001
0.451	-18.9209	-40.1001	-19.5313	-40.0696	-25.0244	-40.1001	-27.4658	-40.1001	-28.6865	-40.1001	-28.0762	-40.1001	-42.1143	-40.0696	-64.6973	-40.1306	-48.8281	-40.1001	-90.9424	-40.1001	-48.8281	-40.1001	-52.4902	-40.1001	-35.4004	-40.1001	-32.3486	-40.0696	-48.8281	-40.1001	-48.2178	-40.1001	-52.4902	-40.1306	-42.1143	-40.1001	-50.6592	-40.1306
0.4515	-24.4141	-40.0696	-19.5313	-40.1001	-7.32422	-40.1001	-26.2451	-40.1306	-34.1797	-40.1001	-42.1143	-40.1001	-37.2314	-40.0696	-68.9697	-40.0696	-23.8037	-40.1001	-70.8008	-40.1001	-46.3867	-40.0696	-50.0488	-40.1306	-46.3867	-40.0696	-38.4521	-40.0696	-50.6592	-40.1001	-52.4902	-40.1001	-40.2832	-40.1001	-35.4004	-40.1001	-42.7246	-40.1001
0.452	-18.9209	-40.1001	-18.9209	-40.0696	-4.88281	-40.1001	-15.8691	-40.1001	-23.8037	-40.1306	-32.3486	-40.1001	-34.79	-40.1001	-59.8145	-40.0696	-43.335	-40.1001	-76.2939	-40.1001	-37.8418	-40.1001	-42.1143	-40.1001	-46.3867	-40.1306	-36.0107	-40.0696	-46.9971	-40.1306	-54.3213	-40.1001	-42.7246	-40.1001	-41.5039	-40.1001	-39.0625	-40.0696
0.4525	-20.752	-40.1001	-8.54492	-40.0696	-6.71387	-40.1001	-10.376	-40.1306	-36.6211	-40.1001	-36.0107	-40.0696	-37.8418	-40.0696	-59.8145	-40.1001	-36.0107	-40.0391	-86.6699	-40.1001	-42.7246	-40.1001	-53.7109	-40.0696	-47.6074	-40.1001	-42.7246	-40.0696	-43.335	-40.1001	-46.3867	-40.1001	-35.4004	-40.1001	-54.3213	-40.1001	-48.2178	-40.1001
0.453	-10.9863	-40.1001	-15.8691	-40.0696	-17.0898	-40.0696	-12.8174	-40.1001	-23.8037	-40.1001	-24.4141	-40.0696	-28.6865	-40.1001	-52.4902	-40.0696	-57.9834	-40.1001	-78.125	-40.1001	-48.2178	-40.1001	-46.3867	-40.0696	-48.8281	-40.1306	-37.2314	-40.1001	-45.7764	-40.1001	-39.0625	-40.1001	-32.3486	-40.1001	-50.6592	-40.0696	-43.335	-40.1001
0.4535	-7.32422	-40.1001	-12.207	-40.0696	1.83105	-40.0696	-26.8555	-40.1306	-40.8936	-40.1001	-31.1279	-40.0696	-21.3623	-40.1306	-45.166	-40.1001	-47.6074	-40.1001	-95.8252	-40.1001	-46.9971	-40.1001	-55.542	-40.1001	-34.1797	-40.1306	-30.5176	-40.1001	-45.166	-40.1001	-45.7764	-40.1306	-44.5557	-40.1001	-54.3213	-40.1001	-60.4248	-40.1001
0.454	-18.9209	-40.1001	-26.8555	-40.0696	-15.8691	-40.0696	-26.2451	-40.0696	-33.5693	-40.0696	-40.2832	-40.0696	-46.3867	-40.1001	-65.918	-40.1001	-52.4902	-40.1001	-89.1113	-40.1001	-31.7383	-40.1001	-40.2832	-40.1001	-59.2041	-40.0696	-32.3486	-40.1001	-31.1279	-40.1001	-63.4766	-40.1001	-33.5693	-40.1001	-57.373	-40.1001	-48.2178	-40.0696
0.4545	-26.8555	-40.0696	-12.8174	-40.1001	-21.3623	-40.1001	-13.4277	-40.1306	-27.4658	-40.1001	-34.79	-40.1001	-47.6074	-40.1001	-38.4521	-40.1306	-62.8662	-40.1001	-75.6836	-40.1001	-51.2695	-40.1001	-32.959	-40.1306	-48.8281	-40.1001	-31.7383	-40.1001	-35.4004	-40.1001	-47.6074	-40.1001	-29.2969	-40.0696	-57.9834	-40.1001	-46.3867	-40.1001
0.455	-17.7002	-40.1306	-20.1416	-40.1001	-18.3105	-40.1001	-11.5967	-40.0696	-27.4658	-40.1001	-16.4795	-40.1001	-39.0625	-40.0696	-45.166	-40.1306	-62.2559	-40.1001	-83.0078	-40.1001	-37.2314	-40.0696	-58.5938	-40.1306	-47.6074	-40.0696	-35.4004	-40.0696	-50.0488	-40.1001	-53.7109	-40.1001	-43.335	-40.1001	-46.3867	-40.0696	-56.7627	-40.1001
0.4555	-21.3623	-40.1001	-18.3105	-40.0696	-9.15527	-40.1001	-30.5176	-40.1001	-32.959	-40.1001	-35.4004	-40.1306	-42.7246	-40.1306	-54.9316	-40.0696	-52.4902	-40.1001	-82.3975	-40.1001	-42.7246	-40.1001	-45.7764	-40.1001	-54.9316	-40.1001	-40.2832	-40.1001	-41.5039	-40.1001	-34.79	-40.1001	-32.959	-40.1001	-48.8281	-40.1001	-52.4902	-40.1306
0.456	-24.4141	-40.1001	-28.0762	-40.1001	-10.376	-40.1001	-21.9727	-40.1306	-18.3105	-40.0696	-29.2969	-40.1001	-48.2178	-40.1001	-62.8662	-40.1306	-48.8281	-40.1001	-83.0078	-40.1001	-39.6729	-40.1001	-51.2695	-40.1001	-55.542	-40.1001	-39.6729	-40.1001	-40.8936	-40.1001	-48.2178	-40.1001	-34.79	-40.0696	-37.8418	-40.1001	-46.9971	-40.0696
0.4565	-14.6484	-40.1001	-27.4658	-40.1001	-17.7002	-40.1001	-15.8691	-40.1306	-32.959	-40.1001	-16.4795	-40.1001	-47.6074	-40.1001	-52.4902	-40.1001	-47.6074	-40.1001	-98.877	-40.1306	-40.8936	-40.0696	-46.3867	-40.0696	-57.373	-40.1001	-43.335	-40.1306	-49.4385	-40.0696	-50.6592	-40.1001	-41.5039	-40.0696	-43.335	-40.1001	-56.7627	-40.1001
0.457	-21.3623	-40.1001	-24.4141	-40.0696	-20.752	-40.1001	-28.6865	-40.0696	-14.0381	-40.1306	-26.2451	-40.0696	-37.8418	-40.1001	-61.0352	-40.1001	-35.4004	-40.1001	-111.084	-40.1001	-50.0488	-40.1001	-44.5557	-40.1001	-51.8799	-40.1001	-47.6074	-40.1001	-40.8936	-40.1001	-42.7246	-40.1001	-43.335	-40.0696	-39.6729	-40.0696	-60.4248	-40.1306
0.4575	-20.752	-40.1001	-12.8174	-40.0696	-14.6484	-40.1001	-20.1416	-40.1001	-17.7002	-40.1001	-27.4658	-40.1001	-40.2832	-40.1001	-61.6455	-40.0696	-31.1279	-40.1306	-113.525	-40.1001	-37.2314	-40.1001	-37.2314	-40.1001	-45.7764	-40.1001	-43.9453	-40.1001	-46.9971	-40.1306	-58.5938	-40.1306	-47.6074	-40.1001	-54.9316	-40.0696	-50.0488	-40.1001
0.458	-6.10352	-40.1001	-26.8555	-40.1001	-1.2207	-40.1001	-22.583	-40.1306	-31.1279	-40.1001	-18.9209	-40.0696	-51.2695	-40.1001	-62.8662	-40.1001	-40.2832	-40.1001	-115.356	-40.1001	-32.3486	-40.0696	-61.6455	-40.1001	-57.9834	-40.1001	-41.5039	-40.0696	-45.7764	-40.1001	-57.373	-40.0696	-45.166	-40.1001	-52.4902	-40.1001	-50.0488	-40.1001
0.4585	-18.3105	-40.1001	-32.959	-40.1306	-15.2588	-40.1001	-17.0898	-40.0696	-20.752	-40.1306	-24.4141	-40.1001	-46.3867	-40.1001	-63.4766	-40.0696	-34.1797	-40.1001	-127.563	-40.1001	-45.166	-40.1306	-50.6592	-40.1001	-43.9453	-40.1001	-42.7246	-40.0696	-34.1797	-40.0696	-57.373	-40.1306	-46.3867	-40.1306	-30.5176	-40.1001	-46.9971	-40.1001
0.459	-15.8691	-40.1001	-38.4521	-40.1001	-12.8174	-40.1001	-14.0381	-40.1306	-21.9727	-40.1306	-18.9209	-40.1001	-28.6865	-40.1001	-68.9697	-40.0391	-50.0488	-40.1001	-108.643	-40.1001	-45.166	-40.1306	-45.166	-40.1001	-46.9971	-40.1306	-39.0625	-40.1001	-33.5693	-40.1001	-45.7764	-40.1001	-33.5693	-40.1306	-53.7109	-40.1001	-50.6592	-40.1306
0.4595	-19.5313	-40.1001	-22.583	-40.1001	-20.1416	-40.1306	-18.9209	-40.1001	-21.9727	-40.1001	-32.959	-40.1001	-26.8555	-40.1001	-74.4629	-40.1001	-40.2832	-40.0696	-106.201	-40.0696	-46.3867	-40.1001	-41.5039	-40.1001	-43.335	-40.1001	-40.8936	-40.1306	-40.8936	-40.1001	-48.8281	-40.1306	-54.9316	-40.1001	-36.6211	-40.0696	-37.8418	-40.0696
0.46	-3.05176	-40.1001	-21.9727	-40.1001	-18.3105	-40.1001	-25.0244	-40.1306	-8.54492	-40.1001	-18.3105	-40.1001	-21.9727	-40.1001	-59.2041	-40.1306	-34.1797	-40.0696	-85.4492	-40.1001	-45.166	-40.0696	-40.8936	-40.1001	-50.6592	-40.1001	-34.79	-40.1001	-45.166	-40.1306	-42.1143	-40.1306	-61.0352	-40.1001	-44.5557	-40.1001	-55.542	-40.0696
0.4605	-15.2588	-40.1306	-20.1416	-40.1001	-25.6348	-40.1001	-18.3105	-40.1001	-26.8555	-40.0696	-24.4141	-40.0696	-34.79	-40.1306	-64.6973	-40.1306	-39.6729	-40.1306	-99.4873	-40.0696	-45.7764	-40.1001	-46.9971	-40.1001	-34.79	-40.0696	-45.166	-40.0696	-61.0352	-40.1306	-59.2041	-40.1306	-61.6455	-40.1001	-37.8418	-40.0696	-37.8418	-40.1001
0.461	-20.752	-40.0696	-17.0898	-40.1001	-17.7002	-40.1001	-21.3623	-40.1001	-28.0762	-40.1306	-20.752	-40.1001	-37.8418	-40.1001	-48.8281	-40.1001	-28.0762	-40.0696	-74.4629	-40.1306	-44.5557	-40.1001	-54.9316	-40.1001	-37.8418	-40.1306	-43.335	-40.1001	-26.8555	-40.1001	-59.8145	-40.1001	-40.8936	-40.0696	-45.7764	-40.0696	-40.2832	-40.1001
0.4615	-14.6484	-40.1001	-10.376	-40.0696	-18.3105	-40.1001	-12.8174	-40.0696	-23.1934	-40.1306	-35.4004	-40.1001	-34.1797	-40.0696	-75.6836	-40.1001	-29.2969	-40.1306	-106.812	-40.1001	-40.8936	-40.1001	-48.8281	-40.1001	-44.5557	-40.1001	-38.4521	-40.1001	-43.335	-40.1001	-41.5039	-40.1001	-44.5557	-40.1306	-40.8936	-40.1001	-50.0488	-40.1001
0.462	-16.4795	-40.0696	-17.7002	-40.1001	-32.959	-40.1001	-4.88281	-40.0696	-21.3623	-40.1001	-22.583	-40.0696	-45.7764	-40.0696	-62.2559	-40.1306	-36.0107	-40.0696	-112.915	-40.1306	-31.7383	-40.1001	-39.6729	-40.1001	-31.1279	-40.0696	-37.8418	-40.1306	-60.4248	-40.1001	-38.4521	-40.1001	-46.3867	-40.1001	-40.8936	-40.1306	-50.6592	-40.1306
0.4625	-4.27246	-40.1001	-15.8691	-40.1001	-26.8555	-40.1001	-12.207	-40.1001	-34.1797	-40.1001	-28.6865	-40.1001	-44.5557	-40.1001	-77.5146	-40.1001	-32.3486	-40.1001	-101.929	-40.1001	-39.0625	-40.1001	-28.6865	-40.1001	-46.9971	-40.1306	-34.1797	-40.1001	-46.9971	-40.0696	-60.4248	-40.0696	-50.6592	-40.1001	-40.8936	-40.1001	-47.6074	-40.1001
0.463	-8.54492	-40.0696	-20.1416	-40.1001	-18.3105	-40.1611	-12.8174	-40.1001	-29.9072	-40.0696	-33.5693	-40.1001	-54.3213	-40.1001	-79.9561	-40.1306	-42.7246	-40.1306	-103.76	-40.1001	-22.583	-40.1001	-40.8936	-40.1001	-34.1797	-40.0696	-36.6211	-40.1001	-44.5557	-40.0696	-51.8799	-40.0696	-48.8281	-40.0696	-36.6211	-40.1001	-54.9316	-40.1001
0.4635	-20.1416	-40.1001	-27.4658	-40.1001	-15.2588	-40.1001	-25.0244	-40.1306	-14.6484	-40.1001	-28.6865	-40.1306	-38.4521	-40.1001	-99.4873	-40.1001	-37.8418	-40.0696	-100.708	-40.1001	-39.6729	-40.0696	-43.9453	-40.1001	-43.9453	-40.1001	-15.8691	-40.1001	-31.7383	-40.1306	-55.542	-40.0696	-44.5557	-40.1001	-42.1143	-40.1001	-50.6592	-40.1001
0.464	-16.4795	-40.1001	-15.2588	-40.1001	-35.4004	-40.1306	-25.6348	-40.1001	-25.0244	-40.1001	-18.9209	-40.0696	-29.9072	-40.1001	-107.422	-40.1001	-50.6592	-40.1001	-107.422	-40.1001	-42.1143	-40.1001	-48.8281	-40.1001	-22.583	-40.1306	-43.335	-40.1001	-46.3867	-40.1001	-41.5039	-40.0696	-42.1143	-40.1001	-39.0625	-40.1001	-52.4902	-40.1001
0.4645	-28.0762	-40.0696	-24.4141	-40.0696	-10.376	-40.0696	-20.752	-40.1001	-20.1416	-40.1001	-14.6484	-40.0696	-56.7627	-40.0696	-107.422	-40.1001	-39.0625	-40.1001	-96.4355	-40.1001	-32.959	-40.1001	-55.542	-40.1001	-53.1006	-40.1001	-41.5039	-40.1001	-45.7764	-40.1001	-36.0107	-40.1001	-45.7764	-40.0696	-27.4658	-40.1001	-39.6729	-40.0696
0.465	-6.71387	-40.1306	-23.8037	-40.1306	-15.2588	-40.0696	-14.6484	-40.1001	-24.4141	-40.1306	-40.2832	-40.1001	-57.373	-40.1001	-112.915	-40.1001	-39.0625	-40.1001	-84.2285	-40.0696	-19.5313	-40.1001	-52.4902	-40.0696	-62.2559	-40.0696	-25.0244	-40.1001	-49.4385	-40.1306	-48.2178	-40.1001	-61.6455	-40.1001	-37.8418	-40.0696	-35.4004	-40.1001
0.4655	-15.8691	-40.1306	-17.7002	-40.0696	-14.0381	-40.1001	-17.7002	-40.0696	-19.5313	-40.1001	-28.0762	-40.0696	-49.4385	-40.0696	-101.318	-40.1001	-39.0625	-40.1001	-113.525	-40.1001	-28.0762	-40.1001	-33.5693	-40.1001	-42.7246	-40.1001	-38.4521	-40.1001	-44.5557	-40.0696	-43.9453	-40.1001	-67.749	-40.1001	-38.4521	-40.0696	-43.335	-40.1001
0.466	-12.8174	-40.1001	-12.207	-40.1306	-31.7383	-40.1001	-18.3105	-40.1001	-34.79	-40.1001	-9.76563	-40.1001	-43.9453	-40.0696	-93.9941	-40.1001	-37.8418	-40.1001	-100.708	-40.1306	-45.7764	-40.1001	-55.542	-40.0696	-42.1143	-40.1001	-22.583	-40.1001	-46.9971	-40.0696	-50.0488	-40.1001	-64.6973	-40.1001	-34.1797	-40.1001	-43.335	-40.1001
0.4665	-8.54492	-40.1001	-21.3623	-40.1001	-24.4141	-40.1001	-20.752	-40.0696	-37.8418	-40.1306	-25.0244	-40.1001	-38.4521	-40.1001	-101.318	-40.1001	-36.6211	-40.0696	-89.1113	-40.1001	-39.6729	-40.0696	-40.8936	-40.1306	-39.0625	-40.0696	-27.4658	-40.1001	-40.2832	-40.0696	-37.8418	-40.1001	-57.373	-40.1001	-46.3867	-40.1001	-42.7246	-40.1001
0.467	-11.5967	-40.0696	-22.583	-40.1001	-19.5313	-40.0696	-8.54492	-40.1306	-25.0244	-40.1001	-30.5176	-40.1306	-35.4004	-40.1001	-104.98	-40.1306	-39.0625	-40.1306	-76.9043	-40.1001	-34.79	-40.1306	-54.3213	-40.1001	-49.4385	-40.1001	-25.6348	-40.1001	-46.9971	-40.1001	-41.5039	-40.0696	-48.2178	-40.1001	-42.1143	-40.0696	-46.3867	-40.1306
0.4675	-22.583	-40.1001	-15.8691	-40.1001	-16.4795	-40.1306	-18.9209	-40.1001	-7.93457	-40.1001	-34.1797	-40.1001	-52.4902	-40.0696	-93.3838	-40.1001	-53.7109	-40.0696	-89.1113	-40.1306	-44.5557	-40.0696	-33.5693	-40.1001	-36.0107	-40.1306	-28.0762	-40.1001	-37.2314	-40.1306	-45.7764	-40.0696	-50.6592	-40.1306	-31.7383	-40.1001	-38.4521	-40.1001
0.468	-12.207	-40.1611	-17.7002	-40.1001	-9.76563	-40.0696	-12.8174	-40.1001	-14.0381	-40.1001	-28.6865	-40.1001	-30.5176	-40.1306	-102.539	-40.1001	-55.542	-40.1001	-67.1387	-40.1001	-49.4385	-40.1001	-39.6729	-40.1001	-45.166	-40.0696	-23.1934	-40.1001	-50.6592	-40.1001	-42.7246	-40.1001	-38.4521	-40.1001	-26.2451	-40.0696	-43.335	-40.1001
0.4685	-17.7002	-40.1306	-14.6484	-40.1001	-5.49316	-40.0696	-20.752	-40.1001	-29.9072	-40.1001	-25.6348	-40.0696	-29.9072	-40.1001	-100.708	-40.1001	-38.4521	-40.1306	-63.4766	-40.1001	-54.9316	-40.1001	-23.1934	-40.1001	-29.2969	-40.0696	-31.7383	-40.1001	-29.9072	-40.1306	-46.9971	-40.1001	-32.959	-40.1001	-37.8418	-40.1001	-39.6729	-40.1306
0.469	-15.8691	-40.1001	-8.54492	-40.1001	-17.7002	-40.1001	-5.49316	-40.1001	-36.6211	-40.1001	-36.0107	-40.0696	-45.166	-40.0696	-101.929	-40.1001	-39.6729	-40.1306	-95.8252	-40.1001	-40.8936	-40.0696	-41.5039	-40.0696	-42.1143	-40.1306	-25.0244	-40.1001	-34.1797	-40.0696	-32.3486	-40.0696	-38.4521	-40.1001	-23.1934	-40.1306	-42.1143	-40.1001
0.4695	-27.4658	-40.1001	-3.66211	-40.1001	-14.6484	-40.1306	-21.3623	-40.1001	-20.752	-40.0696	-36.6211	-40.1001	-48.2178	-40.1001	-88.501	-40.1001	-43.335	-40.1001	-91.5527	-40.0696	-36.6211	-40.0696	-42.1143	-40.1001	-31.7383	-40.1001	-34.79	-40.1001	-52.4902	-40.1306	-64.0869	-40.1306	-37.8418	-40.1306	-48.2178	-40.1001	-33.5693	-40.1001
0.47	-23.8037	-40.0696	-14.0381	-40.1001	-17.7002	-40.1001	-18.9209	-40.1001	-15.2588	-40.1306	-25.6348	-40.1306	-42.7246	-40.1001	-96.4355	-40.1001	-28.0762	-40.0696	-101.318	-40.1306	-43.9453	-40.1306	-46.3867	-40.0696	-41.5039	-40.1001	-36.6211	-40.0696	-43.335	-40.1001	-40.2832	-40.1001	-46.9971	-40.1001	-39.0625	-40.1001	-45.7764	-40.0696
0.4705	-24.4141	-40.0696	-0.610352	-40.0696	-15.8691	-40.0696	-18.3105	-40.1001	-11.5967	-40.1306	-39.0625	-40.0696	-48.2178	-40.0696	-77.5146	-40.1306	-49.4385	-40.1611	-87.8906	-40.1001	-42.7246	-40.1306	-43.9453	-40.1001	-26.2451	-40.1001	-36.0107	-40.1001	-39.6729	-40.1001	-49.4385	-40.0391	-46.3867	-40.1001	-36.6211	-40.1001	-33.5693	-40.1001
0.471	-31.7383	-40.1001	-14.6484	-40.1001	-22.583	-40.1001	-14.0381	-40.1001	-15.8691	-40.1001	-32.3486	-40.1001	-35.4004	-40.0696	-95.8252	-40.1001	-51.2695	-40.1001	-81.1768	-40.1001	-23.8037	-40.1001	-37.8418	-40.1306	-36.6211	-40.1001	-37.8418	-40.1306	-39.6729	-40.1001	-51.8799	-40.1001	-48.2178	-40.0696	-37.8418	-40.1001	-45.166	-40.1001
0.4715	-22.583	-40.1001	-6.10352	-40.1001	-29.2969	-40.1001	-17.7002	-40.1306	-22.583	-40.1001	-38.4521	-40.1306	-42.7246	-40.1306	-97.6563	-40.1001	-45.166	-40.1001	-95.8252	-40.1001	-40.8936	-40.1001	-38.4521	-40.1001	-32.959	-40.1001	-31.1279	-40.1001	-32.3486	-40.1001	-44.5557	-40.1001	-46.3867	-40.1306	-35.4004	-40.1001	-46.9971	-40.1001
0.472	-24.4141	-40.1001	-15.8691	-40.0696	-25.0244	-40.0696	-18.9209	-40.1001	-25.6348	-40.0696	-23.1934	-40.1001	-37.8418	-40.1001	-89.7217	-40.1001	-25.0244	-40.1001	-76.9043	-40.1001	-36.0107	-40.1001	-42.7246	-40.1001	-54.9316	-40.1001	-33.5693	-40.1001	-50.0488	-40.1001	-39.0625	-40.1306	-37.8418	-40.0696	-43.9453	-40.1001	-56.1523	-40.0696
0.4725	-25.6348	-40.1001	-5.49316	-40.1001	-1.83105	-40.1001	-15.2588	-40.1001	-30.5176	-40.1001	-18.3105	-40.1306	-34.79	-40.1001	-113.525	-40.1306	-46.3867	-40.1001	-92.7734	-40.0696	-45.166	-40.1001	-37.8418	-40.0696	-51.8799	-40.1001	-36.0107	-40.1306	-22.583	-40.1001	-52.4902	-40.1001	-47.6074	-40.1001	-39.6729	-40.1306	-39.0625	-40.0696
0.473	-21.9727	-40.1306	-14.6484	-40.1001	-20.1416	-40.0696	-22.583	-40.1001	-29.9072	-40.1001	-25.0244	-40.1001	-59.8145	-40.1001	-97.6563	-40.1001	-67.749	-40.0696	-86.0596	-40.1001	-43.335	-40.0696	-47.6074	-40.0696	-51.8799	-40.1001	-37.8418	-40.1306	-42.1143	-40.1001	-56.1523	-40.1001	-56.7627	-40.1001	-49.4385	-40.1001	-34.1797	-40.1001
0.4735	-17.0898	-40.0696	-16.4795	-40.1001	-18.9209	-40.0696	-14.6484	-40.0696	-34.1797	-40.1001	-14.0381	-40.1001	-43.335	-40.1001	-72.6318	-40.0696	-45.166	-40.0696	-87.2803	-40.1001	-47.6074	-40.1001	-39.0625	-40.0696	-55.542	-40.1001	-36.0107	-40.1306	-36.6211	-40.1001	-37.8418	-40.1001	-43.9453	-40.1001	-46.3867	-40.1306	-46.9971	-40.0696
0.474	-27.4658	-40.1001	-3.66211	-40.1001	-23.8037	-40.1001	-20.1416	-40.1001	-18.9209	-40.1306	-20.752	-40.0696	-56.7627	-40.1001	-54.3213	-40.1001	-54.9316	-40.1001	-75.6836	-40.1001	-32.3486	-40.1306	-43.9453	-40.1001	-46.3867	-40.1306	-57.9834	-40.1001	-34.79	-40.1001	-39.0625	-40.1001	-50.6592	-40.1306	-37.2314	-40.1001	-38.4521	-40.1001
0.4745	-25.0244	-40.1001	-17.0898	-40.1001	-17.7002	-40.1001	-18.3105	-40.0696	-29.2969	-40.1001	-25.0244	-40.1001	-43.335	-40.1306	-59.2041	-40.0696	-54.3213	-40.1001	-84.2285	-40.0696	-43.9453	-40.1001	-42.7246	-40.1001	-42.1143	-40.1001	-44.5557	-40.1001	-42.1143	-40.1001	-54.9316	-40.0696	-45.7764	-40.1306	-37.2314	-40.1001	-52.4902	-40.1001
0.475	-29.2969	-40.0696	-7.93457	-40.1306	-7.93457	-40.1306	-14.0381	-40.1001	-17.0898	-40.0696	-18.3105	-40.1001	-46.9971	-40.0696	-77.5146	-40.1001	-39.0625	-40.1306	-81.1768	-40.1001	-35.4004	-40.1001	-51.8799	-40.1001	-32.959	-40.1001	-39.6729	-40.1001	-32.3486	-40.1001	-50.0488	-40.1001	-44.5557	-40.0696	-48.2178	-40.1001	-47.6074	-40.1306
0.4755	-28.0762	-40.1001	-14.0381	-40.1001	-12.8174	-40.1001	-12.8174	-40.1001	-23.8037	-40.1001	-22.583	-40.1001	-42.7246	-40.0696	-66.5283	-40.1001	-32.959	-40.1001	-73.8525	-40.1001	-41.5039	-40.0696	-48.2178	-40.1001	-43.9453	-40.1306	-39.0625	-40.1306	-41.5039	-40.1001	-59.8145	-40.1001	-32.3486	-40.1001	-43.335	-40.1001	-53.1006	-40.1001
0.476	-21.3623	-40.1001	-23.8037	-40.0696	-8.54492	-40.1001	-12.8174	-40.0696	-17.7002	-40.1001	-39.0625	-40.1001	-45.7764	-40.1001	-66.5283	-40.0696	-49.4385	-40.1001	-89.7217	-40.1001	-44.5557	-40.1001	-40.2832	-40.0696	-40.8936	-40.1001	-40.2832	-40.0696	-49.4385	-40.1001	-53.1006	-40.1306	-43.9453	-40.1001	-48.2178	-40.0696	-67.1387	-40.1001
0.4765	-23.1934	-40.1306	-14.0381	-40.0696	-11.5967	-40.0696	-15.8691	-40.1001	-25.0244	-40.1306	-28.6865	-40.1001	-57.373	-40.0696	-61.6455	-40.1001	-39.0625	-40.1001	-81.7871	-40.1001	-33.5693	-40.1001	-42.1143	-40.1001	-49.4385	-40.0696	-36.6211	-40.1001	-42.1143	-40.1001	-59.2041	-40.1306	-36.6211	-40.1001	-45.7764	-40.1306	-57.9834	-40.0696
0.477	-24.4141	-40.1001	-16.4795	-40.1001	-12.207	-40.1001	-24.4141	-40.1001	-25.0244	-40.1001	-19.5313	-40.0696	-57.373	-40.0696	-81.1768	-40.1001	-39.0625	-40.0696	-90.332	-40.1001	-40.2832	-40.0696	-30.5176	-40.1001	-35.4004	-40.1001	-54.9316	-40.1001	-37.8418	-40.0696	-51.2695	-40.1001	-42.7246	-40.0696	-53.7109	-40.1001	-59.2041	-40.1001
0.4775	-24.4141	-40.0696	-20.1416	-40.1001	-25.0244	-40.1306	-25.0244	-40.0696	-17.7002	-40.1001	-28.0762	-40.0696	-58.5938	-40.1001	-61.0352	-40.0696	-45.7764	-40.1001	-82.3975	-40.1001	-44.5557	-40.1001	-51.8799	-40.0696	-45.7764	-40.1001	-28.6865	-40.1001	-39.0625	-40.1001	-55.542	-40.1001	-54.9316	-40.1001	-29.9072	-40.1001	-46.3867	-40.1001
0.478	-1.83105	-40.1001	-21.9727	-40.1306	-18.3105	-40.1306	-31.1279	-40.0696	-20.752	-40.1001	-29.9072	-40.1001	-56.1523	-40.0696	-59.2041	-40.1001	-46.3867	-40.1306	-75.6836	-40.0696	-43.335	-40.1001	-42.7246	-40.1001	-44.5557	-40.1001	-43.9453	-40.1001	-37.2314	-40.1001	-54.9316	-40.1001	-43.9453	-40.0696	-48.2178	-40.1306	-57.373	-40.1306
0.4785	-15.2588	-40.1001	-18.3105	-40.1306	-15.2588	-40.1001	-17.0898	-40.1306	-20.1416	-40.1306	-24.4141	-40.1001	-54.3213	-40.1001	-70.1904	-40.0696	-31.1279	-40.1001	-99.4873	-40.1001	-35.4004	-40.1001	-43.335	-40.1001	-39.6729	-40.1001	-40.2832	-40.1001	-52.4902	-40.0696	-47.6074	-40.0696	-44.5557	-40.1001	-49.4385	-40.1001	-44.5557	-40.1001
0.479	-19.5313	-40.0696	-20.752	-40.1306	-14.6484	-40.1306	-0.610352	-40.1001	-26.2451	-40.0696	-31.7383	-40.1306	-45.166	-40.1306	-70.8008	-40.0696	-50.0488	-40.1001	-94.6045	-40.1001	-45.166	-40.1001	-38.4521	-40.1306	-36.0107	-40.1001	-36.0107	-40.1001	-40.2832	-40.1001	-68.9697	-40.0696	-49.4385	-40.1306	-29.9072	-40.1001	-40.8936	-40.1306
0.4795	-8.54492	-40.1306	-19.5313	-40.0696	-15.2588	-40.0696	-9.76563	-40.1001	-21.9727	-40.0696	-32.959	-40.0696	-58.5938	-40.0696	-58.5938	-40.1306	-50.6592	-40.1306	-74.4629	-40.1001	-43.9453	-40.1306	-43.335	-40.1306	-43.9453	-40.1001	-47.6074	-40.1001	-35.4004	-40.1001	-51.2695	-40.0696	-52.4902	-40.1306	-46.3867	-40.1001	-59.8145	-40.1306
0.48	-12.8174	-40.1001	-15.8691	-40.1306	-19.5313	-40.0696	-28.0762	-40.1001	-26.8555	-40.1001	-18.9209	-40.1306	-53.7109	-40.1306	-81.1768	-40.0696	-36.6211	-40.1001	-59.2041	-40.1001	-30.5176	-40.0696	-47.6074	-40.0696	-34.1797	-40.1001	-36.6211	-40.1001	-35.4004	-40.1306	-41.5039	-40.1001	-49.4385	-40.1001	-43.9453	-40.1001	-50.0488	-40.1001
0.4805	-12.207	-40.1001	-14.6484	-40.1001	-14.6484	-40.1001	-7.32422	-40.1001	-28.6865	-40.1001	-19.5313	-40.1001	-45.166	-40.0696	-70.8008	-40.0391	-30.5176	-40.1001	-83.6182	-40.1001	-31.7383	-40.1001	-46.9971	-40.0696	-45.166	-40.1306	-50.6592	-40.1306	-40.8936	-40.1001	-62.2559	-40.1001	-30.5176	-40.0696	-35.4004	-40.1001	-39.0625	-40.1001
0.481	-15.2588	-40.1001	-9.76563	-40.1306	-12.8174	-40.0696	-14.6484	-40.1001	-34.1797	-40.1001	-40.2832	-40.1001	-59.2041	-40.1001	-67.1387	-40.1001	-49.4385	-40.1001	-81.1768	-40.1001	-43.335	-40.1001	-34.79	-40.1306	-48.8281	-40.1001	-46.3867	-40.1306	-41.5039	-40.1001	-60.4248	-40.1001	-42.1143	-40.1001	-42.7246	-40.1001	-54.9316	-40.1001
0.4815	-23.1934	-40.1001	-32.3486	-40.0696	-23.8037	-40.0696	-15.8691	-40.1001	-25.6348	-40.1001	-34.1797	-40.1001	-54.3213	-40.1001	-73.2422	-40.1001	-37.8418	-40.1306	-79.9561	-40.1001	-39.6729	-40.1001	-41.5039	-40.1001	-41.5039	-40.1001	-50.6592	-40.1001	-53.1006	-40.0696	-49.4385	-40.0696	-38.4521	-40.0696	-40.8936	-40.1001	-57.373	-40.1001
0.482	-10.9863	-40.1001	-17.7002	-40.1306	-21.9727	-40.1306	-19.5313	-40.1001	-28.6865	-40.0696	-26.2451	-40.0696	-37.8418	-40.1001	-70.8008	-40.1001	-43.9453	-40.0696	-78.125	-40.1001	-42.1143	-40.0696	-42.7246	-40.1001	-39.0625	-40.1001	-45.166	-40.1001	-52.4902	-40.1001	-45.7764	-40.1001	-48.8281	-40.1306	-40.8936	-40.1001	-56.1523	-40.1001
0.4825	-18.3105	-40.1001	-14.0381	-40.1306	-3.05176	-40.1001	-19.5313	-40.1001	-24.4141	-40.1001	-21.9727	-40.1001	-35.4004	-40.1001	-68.9697	-40.1001	-35.4004	-40.1001	-101.929	-40.1001	-30.5176	-40.1001	-48.8281	-40.1306	-37.2314	-40.0696	-43.9453	-40.1001	-40.2832	-40.1001	-48.8281	-40.1001	-48.8281	-40.1001	-34.1797	-40.1001	-50.0488	-40.1001
0.483	-23.8037	-40.1001	-19.5313	-40.1001	-15.8691	-40.1001	-32.3486	-40.1001	-40.2832	-40.1001	-28.6865	-40.1306	-55.542	-40.1306	-78.125	-40.1306	-46.9971	-40.1001	-106.812	-40.1306	-25.6348	-40.1001	-54.3213	-40.1001	-48.2178	-40.0696	-43.335	-40.1001	-28.6865	-40.1001	-45.7764	-40.0696	-43.9453	-40.1001	-46.3867	-40.1001	-39.0625	-40.1001
0.4835	-18.9209	-40.1001	-25.6348	-40.1001	-19.5313	-40.1306	-18.3105	-40.1001	-21.3623	-40.1306	-19.5313	-40.1001	-45.166	-40.1001	-92.1631	-40.1001	-45.166	-40.1001	-96.4355	-40.1001	-42.7246	-40.1001	-45.7764	-40.1001	-34.1797	-40.1306	-36.0107	-40.1001	-56.7627	-40.1001	-55.542	-40.0696	-40.2832	-40.1306	-42.7246	-40.1001	-46.3867	-40.1001
0.484	-15.8691	-40.1001	-15.8691	-40.1001	-14.6484	-40.1306	-25.6348	-40.1001	-8.54492	-40.1001	-31.7383	-40.1001	-31.7383	-40.1001	-74.4629	-40.1001	-46.9971	-40.1001	-97.6563	-40.1001	-36.0107	-40.1306	-38.4521	-40.1001	-32.3486	-40.1001	-42.1143	-40.1306	-40.2832	-40.1306	-54.3213	-40.1306	-42.1143	-40.1306	-37.8418	-40.1306	-61.0352	-40.1001
0.4845	-24.4141	-40.1001	-10.9863	-40.1001	-6.10352	-40.1001	-12.8174	-40.1001	-19.5313	-40.1001	-17.0898	-40.1001	-35.4004	-40.1001	-69.5801	-40.0696	-51.8799	-40.0696	-106.812	-40.1001	-31.7383	-40.1001	-33.5693	-40.1001	-41.5039	-40.1306	-46.9971	-40.1306	-32.959	-40.1001	-45.166	-40.0696	-50.6592	-40.1001	-34.1797	-40.0696	-39.6729	-40.1001
0.485	-7.93457	-40.1001	-14.6484	-40.1001	-15.8691	-40.1001	-35.4004	-40.1001	-25.6348	-40.1306	-28.0762	-40.1001	-32.3486	-40.0696	-81.1768	-40.1001	-39.6729	-40.1001	-103.149	-40.1001	-40.2832	-40.0696	-45.7764	-40.0696	-39.0625	-40.1306	-41.5039	-40.1001	-49.4385	-40.1001	-49.4385	-40.1001	-35.4004	-40.0696	-34.1797	-40.1001	-53.7109	-40.1001
0.4855	-13.4277	-40.1306	-23.8037	-40.0696	-10.376	-40.1001	-20.1416	-40.0696	-29.2969	-40.1306	-21.9727	-40.1001	-30.5176	-40.1306	-76.2939	-40.0696	-40.2832	-40.1306	-84.2285	-40.1001	-37.8418	-40.0696	-34.1797	-40.1001	-46.9971	-40.1001	-48.8281	-40.1001	-43.335	-40.1001	-47.6074	-40.0696	-55.542	-40.0696	-31.7383	-40.1001	-40.8936	-40.1001
0.486	-11.5967	-40.1001	-14.0381	-40.0696	-17.7002	-40.0696	-38.4521	-40.1001	-26.2451	-40.1306	-22.583	-40.1001	-49.4385	-40.0696	-81.7871	-40.1001	-31.7383	-40.1001	-86.0596	-40.0696	-42.1143	-40.1306	-40.8936	-40.1001	-36.0107	-40.1001	-31.7383	-40.1001	-28.0762	-40.1001	-45.166	-40.1001	-48.8281	-40.1001	-45.166	-40.1306	-39.0625	-40.1001
0.4865	-17.7002	-40.1001	-14.0381	-40.1001	-29.9072	-40.1001	-18.3105	-40.0696	-20.752	-40.0696	-25.0244	-40.1306	-34.79	-40.0696	-65.918	-40.1001	-42.7246	-40.0696	-98.2666	-40.1001	-35.4004	-40.1001	-31.1279	-40.1001	-46.9971	-40.1306	-51.2695	-40.1001	-33.5693	-40.1001	-42.1143	-40.0696	-48.8281	-40.1001	-45.7764	-40.1306	-53.7109	-40.1306
0.487	-11.5967	-40.0696	-17.0898	-40.1306	-34.1797	-40.1001	-26.2451	-40.1001	-22.583	-40.1001	-37.2314	-40.1001	-46.3867	-40.1306	-95.2148	-40.1001	-34.1797	-40.1306	-84.8389	-40.1001	-29.2969	-40.0696	-34.79	-40.1306	-47.6074	-40.1306	-45.7764	-40.1001	-45.7764	-40.0696	-49.4385	-40.1001	-53.7109	-40.1001	-35.4004	-40.1001	-39.0625	-40.1001
0.4875	-26.8555	-40.1001	-15.2588	-40.1001	-13.4277	-40.1001	-36.0107	-40.1001	-17.0898	-40.1306	-33.5693	-40.1001	-37.8418	-40.1306	-74.4629	-40.1001	-50.0488	-40.1001	-86.0596	-40.1001	-46.9971	-40.1001	-43.335	-40.0696	-33.5693	-40.1001	-59.2041	-40.1306	-54.9316	-40.1001	-39.0625	-40.1001	-33.5693	-40.1001	-45.7764	-40.1001	-40.8936	-40.1306
0.488	-14.6484	-40.1001	-8.54492	-40.1001	-13.4277	-40.1306	-16.4795	-40.1001	-29.2969	-40.1001	-29.2969	-40.1001	-38.4521	-40.1306	-73.8525	-40.1001	-40.2832	-40.0696	-90.9424	-40.1001	-54.9316	-40.1001	-32.3486	-40.1001	-35.4004	-40.0696	-39.6729	-40.1001	-39.6729	-40.1001	-35.4004	-40.1001	-35.4004	-40.1001	-46.9971	-40.0696	-32.959	-40.0696
0.4885	-14.0381	-40.1306	-12.8174	-40.1306	-17.0898	-40.1306	-30.5176	-40.0696	-28.6865	-40.1001	-28.6865	-40.1306	-35.4004	-40.1001	-81.7871	-40.0696	-44.5557	-40.0696	-67.749	-40.1001	-34.1797	-40.0696	-30.5176	-40.1001	-44.5557	-40.0696	-39.0625	-40.1001	-34.1797	-40.1306	-28.6865	-40.1001	-51.8799	-40.0696	-45.7764	-40.1001	-39.6729	-40.1306
0.489	-23.8037	-40.1001	-10.9863	-40.1001	-22.583	-40.1001	-32.959	-40.1306	-29.2969	-40.0696	-28.6865	-40.1001	-39.6729	-40.1001	-79.3457	-40.1001	-67.1387	-40.1001	-72.6318	-40.1001	-36.6211	-40.1001	-34.1797	-40.1001	-42.7246	-40.1001	-44.5557	-40.0696	-51.2695	-40.1001	-37.8418	-40.1001	-32.959	-40.0696	-46.9971	-40.1001	-40.2832	-40.1001
0.4895	-20.752	-40.0696	-9.15527	-40.1306	-23.8037	-40.1306	-17.7002	-40.1001	-20.752	-40.1306	-15.8691	-40.0696	-44.5557	-40.1001	-100.098	-40.0696	-43.9453	-40.1001	-86.0596	-40.1001	-32.959	-40.0696	-38.4521	-40.1306	-42.7246	-40.1306	-42.7246	-40.1001	-45.166	-40.1001	-61.0352	-40.1001	-26.8555	-40.1001	-46.9971	-40.1001	-39.0625	-40.1001
0.49	-7.93457	-40.0696	-21.9727	-40.1001	-20.1416	-40.0696	-26.2451	-40.1001	-23.8037	-40.1001	-40.8936	-40.1001	-42.7246	-40.1001	-75.0732	-40.1001	-62.2559	-40.1001	-70.1904	-40.1001	-48.2178	-40.1001	-28.6865	-40.1001	-42.7246	-40.0696	-27.4658	-40.1001	-43.9453	-40.1001	-49.4385	-40.1001	-36.0107	-40.0696	-51.2695	-40.1001	-47.6074	-40.1001
0.4905	-12.8174	-40.1001	-11.5967	-40.1001	-20.752	-40.1306	-17.7002	-40.1001	-17.0898	-40.0696	-40.8936	-40.1306	-32.959	-40.1001	-70.8008	-40.1306	-46.3867	-40.1306	-81.1768	-40.1001	-48.2178	-40.1001	-29.9072	-40.1001	-45.7764	-40.1001	-35.4004	-40.1306	-34.1797	-40.1306	-45.7764	-40.0696	-43.335	-40.0696	-45.7764	-40.1001	-34.79	-40.1001
0.491	-12.207	-40.1001	-10.376	-40.1306	-24.4141	-40.1001	-25.6348	-40.1306	-14.6484	-40.1306	-26.2451	-40.1001	-36.0107	-40.0696	-81.1768	-40.1001	-52.4902	-40.1001	-68.3594	-40.1001	-44.5557	-40.0696	-32.959	-40.1001	-51.2695	-40.1001	-34.79	-40.1001	-46.9971	-40.1306	-51.2695	-40.1001	-42.7246	-40.1306	-57.373	-40.1306	-46.9971	-40.1001
0.4915	-15.8691	-40.1001	-23.8037	-40.1306	-16.4795	-40.1001	-18.3105	-40.1001	-35.4004	-40.1001	-27.4658	-40.1306	-27.4658	-40.1001	-83.0078	-40.1001	-50.0488	-40.1001	-62.2559	-40.1306	-36.6211	-40.1001	-37.8418	-40.1001	-48.8281	-40.1001	-29.9072	-40.1001	-39.0625	-40.1001	-46.9971	-40.1306	-30.5176	-40.0696	-54.9316	-40.1001	-38.4521	-40.0696
0.492	-20.1416	-40.1001	-16.4795	-40.0696	-11.5967	-40.1306	-21.3623	-40.1306	-21.9727	-40.1001	-11.5967	-40.1001	-32.3486	-40.1001	-55.542	-40.1306	-44.5557	-40.0696	-56.7627	-40.1306	-42.7246	-40.1001	-38.4521	-40.1001	-41.5039	-40.1001	-33.5693	-40.0696	-42.1143	-40.1001	-61.0352	-40.1306	-37.8418	-40.1001	-45.166	-40.1306	-50.6592	-40.1001
0.4925	-17.7002	-40.1001	-10.9863	-40.1001	-7.32422	-40.1001	-25.6348	-40.1001	-17.7002	-40.1001	-37.8418	-40.1001	-32.3486	-40.1001	-49.4385	-40.1001	-42.7246	-40.1001	-76.2939	-40.1001	-34.1797	-40.0696	-40.8936	-40.1001	-43.9453	-40.0696	-29.2969	-40.1001	-32.959	-40.1001	-42.7246	-40.0696	-37.8418	-40.0696	-40.8936	-40.0696	-35.4004	-40.0696
0.493	-20.1416	-40.1001	-17.7002	-40.1001	-7.93457	-40.1001	-27.4658	-40.0696	-26.2451	-40.0696	-38.4521	-40.1001	-43.335	-40.1001	-67.749	-40.0696	-61.6455	-40.1001	-57.9834	-40.1306	-44.5557	-40.1001	-31.7383	-40.0696	-44.5557	-40.1001	-38.4521	-40.1001	-40.8936	-40.1001	-45.7764	-40.1001	-37.8418	-40.1001	-37.8418	-40.1001	-31.1279	-40.0696
0.4935	-18.9209	-40.1306	-21.3623	-40.1001	-21.9727	-40.0696	-22.583	-40.1001	-16.4795	-40.0696	-50.0488	-40.1001	-73.8525	-40.1001	-68.3594	-40.1001	-65.918	-40.0696	-87.2803	-40.1001	-40.2832	-40.1001	-42.1143	-40.1001	-53.7109	-40.1001	-46.3867	-40.1001	-36.0107	-40.1001	-56.7627	-40.1306	-39.6729	-40.1001	-58.5938	-40.1001	-24.4141	-40.1001
0.494	-15.2588	-40.1001	-12.207	-40.1001	-17.7002	-40.1001	-20.752	-40.1001	-18.3105	-40.0696	-19.5313	-40.1001	-44.5557	-40.1001	-58.5938	-40.0696	-56.1523	-40.1306	-79.3457	-40.1001	-33.5693	-40.1306	-40.8936	-40.0696	-44.5557	-40.1001	-42.7246	-40.1001	-31.1279	-40.0696	-67.749	-40.1001	-39.6729	-40.1001	-42.1143	-40.1306	-56.7627	-40.1001
0.4945	-20.752	-40.1001	-13.4277	-40.1001	-16.4795	-40.1306	-21.3623	-40.1001	-25.6348	-40.1001	-31.1279	-40.1306	-51.2695	-40.1001	-55.542	-40.1001	-58.5938	-40.1001	-70.1904	-40.0696	-57.9834	-40.1306	-43.9453	-40.1001	-48.8281	-40.1306	-42.7246	-40.1001	-34.79	-40.0696	-61.0352	-40.1001	-36.6211	-40.0696	-46.3867	-40.1306	-41.5039	-40.1001
0.495	-24.4141	-40.1306	-17.7002	-40.1001	-20.1416	-40.1001	-29.2969	-40.1306	-20.1416	-40.1001	-31.7383	-40.1001	-50.6592	-40.1001	-53.7109	-40.1001	-51.8799	-40.1001	-88.501	-40.0696	-59.8145	-40.1001	-34.79	-40.1001	-38.4521	-40.1001	-40.2832	-40.1001	-41.5039	-40.0696	-47.6074	-40.1001	-40.8936	-40.1001	-48.8281	-40.1001	-43.335	-40.1306
0.4955	-6.71387	-40.1306	-13.4277	-40.1001	-22.583	-40.1306	-29.9072	-40.1001	-28.0762	-40.1001	-28.0762	-40.1001	-45.7764	-40.1306	-53.7109	-40.1001	-37.2314	-40.1001	-84.8389	-40.0696	-50.6592	-40.1001	-44.5557	-40.1001	-41.5039	-40.1001	-43.335	-40.1001	-39.0625	-40.1001	-46.3867	-40.1001	-39.0625	-40.0696	-38.4521	-40.1001	-42.7246	-40.1306
0.496	-18.9209	-40.1001	-10.9863	-40.1306	-24.4141	-40.1001	-34.1797	-40.1001	-9.76563	-40.0696	-28.6865	-40.1001	-42.7246	-40.1001	-53.7109	-40.1001	-41.5039	-40.1001	-60.4248	-40.0696	-43.335	-40.1001	-48.2178	-40.0696	-48.8281	-40.1001	-34.1797	-40.1001	-34.1797	-40.1001	-65.3076	-40.1001	-41.5039	-40.0696	-44.5557	-40.0696	-53.1006	-40.0696
0.4965	-13.4277	-40.1306	-26.2451	-40.1306	-28.0762	-40.1001	-19.5313	-40.1001	-29.9072	-40.0696	-30.5176	-40.1001	-46.9971	-40.1306	-44.5557	-40.0696	-59.8145	-40.1001	-73.2422	-40.1001	-51.8799	-40.1001	-35.4004	-40.1001	-33.5693	-40.1001	-33.5693	-40.1001	-34.79	-40.1001	-65.918	-40.1001	-47.6074	-40.1001	-35.4004	-40.1001	-56.1523	-40.1001
0.497	-12.8174	-40.1306	-26.2451	-40.1001	-27.4658	-40.1001	-22.583	-40.1306	-32.3486	-40.0696	-31.1279	-40.0696	-45.7764	-40.1001	-65.918	-40.1001	-33.5693	-40.1001	-79.3457	-40.0696	-35.4004	-40.1001	-36.6211	-40.1001	-30.5176	-40.1001	-40.8936	-40.0696	-40.8936	-40.1306	-57.9834	-40.1001	-48.2178	-40.0696	-26.8555	-40.1001	-42.1143	-40.1001
0.4975	-17.0898	-40.1306	-26.2451	-40.1001	-16.4795	-40.1001	-12.8174	-40.1306	-3.66211	-40.1306	-29.2969	-40.1001	-62.8662	-40.1001	-68.9697	-40.0696	-61.0352	-40.1001	-70.1904	-40.0696	-49.4385	-40.1306	-48.8281	-40.1001	-39.0625	-40.1001	-57.9834	-40.1001	-32.3486	-40.1001	-54.9316	-40.1001	-53.7109	-40.1001	-36.0107	-40.0696	-32.959	-40.0696
0.498	-16.4795	-40.1306	-7.32422	-40.1001	-14.0381	-40.1306	-12.8174	-40.1001	-6.71387	-40.1001	-26.8555	-40.1306	-47.6074	-40.1306	-64.6973	-40.1001	-51.2695	-40.1001	-74.4629	-40.1001	-36.6211	-40.1001	-45.166	-40.1001	-31.7383	-40.1001	-34.79	-40.0696	-36.6211	-40.1001	-47.6074	-40.1001	-32.3486	-40.1306	-37.8418	-40.1001	-50.0488	-40.1001
0.4985	-18.9209	-40.1306	-15.2588	-40.1001	-15.8691	-40.0696	-12.8174	-40.1306	-21.9727	-40.1001	-13.4277	-40.1001	-50.6592	-40.1306	-57.373	-40.1306	-45.166	-40.1001	-68.9697	-40.1001	-45.166	-40.1001	-50.6592	-40.1001	-48.8281	-40.1001	-31.7383	-40.1001	-30.5176	-40.1001	-54.3213	-40.1001	-33.5693	-40.1001	-32.3486	-40.1306	-53.7109	-40.1001
0.499	-25.6348	-40.0696	-17.7002	-40.1306	-26.8555	-40.1306	-26.8555	-40.1001	-22.583	-40.0696	-15.8691	-40.1001	-68.3594	-40.0696	-57.9834	-40.1001	-59.2041	-40.1001	-78.125	-40.1306	-56.7627	-40.1001	-39.0625	-40.1001	-34.1797	-40.1306	-41.5039	-40.1306	-28.6865	-40.1001	-58.5938	-40.1001	-41.5039	-40.1001	-40.2832	-40.0696	-45.166	-40.1001
0.4995	-4.88281	-40.0696	-20.1416	-40.1001	-15.8691	-40.1001	-16.4795	-40.0696	-17.0898	-40.1001	-24.4141	-40.1306	-56.7627	-40.1001	-67.749	-40.1001	-26.8555	-40.0696	-78.125	-40.0696	-51.8799	-40.1001	-47.6074	-40.1001	-46.3867	-40.1001	-39.0625	-40.0696	-17.0898	-40.1001	-34.79	-40.1001	-45.7764	-40.1306	-42.1143	-40.1001	-43.335	-40.1001
0.5	-10.376	-40.1001	-12.8174	-40.1306	-12.207	-40.0696	-30.5176	-40.1001	-29.9072	-40.1001	-22.583	-40.1001	-51.8799	-40.1001	-74.4629	-40.1306	-28.6865	-40.1001	-81.1768	-40.1001	-32.959	-40.1001	-39.6729	-40.1306	-55.542	-40.1001	-31.1279	-40.1306	-37.8418	-40.1001	-43.9453	-40.1001	-32.3486	-40.1001	-42.1143	-40.1306	-47.6074	-40.1306
0.5005	-20.1416	-40.1306	-2.44141	-40.1001	-26.2451	-40.1001	-22.583	-40.1001	-19.5313	-40.1306	-26.8555	-40.0696	-41.5039	-40.1001	-67.749	-40.1001	-42.7246	-40.0696	-93.9941	-40.1001	-39.0625	-40.0696	-39.6729	-40.1001	-55.542	-40.1306	-36.6211	-40.1306	-39.6729	-40.0696	-55.542	-40.1001	-46.9971	-40.1001	-31.1279	-40.1001	-51.8799	-40.1001
0.501	-26.8555	-40.1001	-23.1934	-40.1001	-10.9863	-40.1001	-29.2969	-40.1001	-27.4658	-40.1001	-20.752	-40.1001	-39.6729	-40.1306	-68.3594	-40.1001	-32.959	-40.0696	-100.098	-40.1001	-28.6865	-40.1306	-38.4521	-40.1001	-40.8936	-40.1001	-39.6729	-40.1306	-31.1279	-40.1306	-42.7246	-40.1001	-41.5039	-40.1001	-37.8418	-40.1001	-53.1006	-40.1001
0.5015	-20.752	-40.1001	-14.0381	-40.1001	-25.6348	-40.1001	-11.5967	-40.0696	-17.0898	-40.0696	-23.8037	-40.0696	-54.3213	-40.1001	-77.5146	-40.1001	-51.2695	-40.1306	-94.6045	-40.0696	-30.5176	-40.1001	-43.335	-40.1001	-39.0625	-40.0696	-32.3486	-40.1001	-34.1797	-40.0696	-37.8418	-40.1001	-37.2314	-40.1001	-46.9971	-40.1001	-40.2832	-40.1001
0.502	-16.4795	-40.1001	-12.207	-40.1001	-26.8555	-40.1001	-16.4795	-40.1001	-30.5176	-40.1001	-23.8037	-40.0696	-45.7764	-40.1001	-86.0596	-40.0696	-52.4902	-40.1001	-109.253	-40.1001	-38.4521	-40.1306	-46.3867	-40.1001	-34.79	-40.1001	-38.4521	-40.0696	-49.4385	-40.0696	-39.0625	-40.1001	-43.335	-40.1001	-39.6729	-40.1001	-47.6074	-40.1001
0.5025	-11.5967	-40.1001	-20.1416	-40.1306	-21.9727	-40.1001	-17.7002	-40.0391	-27.4658	-40.1001	-25.6348	-40.1001	-33.5693	-40.1001	-77.5146	-40.0696	-36.6211	-40.1001	-91.5527	-40.1001	-32.959	-40.1001	-28.6865	-40.1001	-36.0107	-40.1306	-24.4141	-40.1001	-35.4004	-40.1001	-31.1279	-40.1001	-37.8418	-40.1001	-39.6729	-40.0696	-56.7627	-40.1001
0.503	-18.9209	-40.1001	-5.49316	-40.1001	-15.8691	-40.1001	-21.9727	-40.1001	-23.8037	-40.1001	-30.5176	-40.1001	-50.6592	-40.1306	-79.3457	-40.1001	-36.0107	-40.1001	-87.8906	-40.1306	-37.2314	-40.1001	-42.7246	-40.1001	-39.0625	-40.1001	-42.1143	-40.1001	-39.6729	-40.1306	-37.2314	-40.1001	-42.1143	-40.1001	-39.0625	-40.1001	-43.9453	-40.1001
0.5035	-17.7002	-40.1001	-12.8174	-40.1001	-15.8691	-40.1001	-25.6348	-40.1306	-23.8037	-40.1306	-12.8174	-40.1001	-39.6729	-40.1306	-87.8906	-40.1001	-42.7246	-40.1306	-98.2666	-40.1001	-37.8418	-40.1001	-46.9971	-40.1306	-31.7383	-40.0696	-34.79	-40.1001	-31.7383	-40.1001	-45.7764	-40.1001	-46.3867	-40.0696	-34.79	-40.0696	-50.6592	-40.1001
0.504	-17.0898	-40.1001	-14.0381	-40.1306	-26.2451	-40.1001	-25.6348	-40.1001	-21.3623	-40.1001	-33.5693	-40.0696	-23.1934	-40.1001	-74.4629	-40.1306	-30.5176	-40.1001	-101.318	-40.1306	-36.6211	-40.1001	-45.166	-40.1001	-35.4004	-40.0696	-29.2969	-40.1001	-45.166	-40.1001	-40.8936	-40.0696	-48.2178	-40.1001	-40.8936	-40.1001	-56.7627	-40.0696
0.5045	-4.88281	-40.1001	-15.2588	-40.1001	-27.4658	-40.0696	-32.3486	-40.1001	-24.4141	-40.1001	-30.5176	-40.1001	-46.3867	-40.1001	-71.4111	-40.1001	-42.7246	-40.1001	-84.8389	-40.1001	-36.6211	-40.0696	-52.4902	-40.1001	-42.7246	-40.1001	-31.1279	-40.1001	-50.0488	-40.1001	-45.7764	-40.1306	-48.8281	-40.1306	-29.2969	-40.1001	-36.0107	-40.1306
0.505	-10.9863	-40.1001	-20.1416	-40.0696	-23.8037	-40.1001	-31.1279	-40.1001	-25.6348	-40.1001	-12.207	-40.1001	-46.3867	-40.1001	-64.0869	-40.0696	-39.6729	-40.1001	-102.539	-40.0696	-34.1797	-40.1306	-52.4902	-40.0696	-39.0625	-40.1001	-36.6211	-40.1306	-37.8418	-40.1306	-61.0352	-40.1001	-42.1143	-40.1001	-31.7383	-40.1001	-54.9316	-40.0696
0.5055	-27.4658	-40.1001	-21.3623	-40.1001	-4.88281	-40.1001	-19.5313	-40.0696	-23.1934	-40.1306	-28.0762	-40.0696	-56.7627	-40.0696	-74.4629	-40.0696	-42.1143	-40.1001	-92.1631	-40.1001	-29.2969	-40.1001	-29.2969	-40.1001	-39.6729	-40.1001	-34.1797	-40.1001	-50.0488	-40.1001	-42.7246	-40.1001	-57.9834	-40.1001	-42.7246	-40.1001	-30.5176	-40.0696
0.506	-20.1416	-40.1001	-21.9727	-40.0696	-14.0381	-40.0696	-30.5176	-40.0696	-26.8555	-40.1001	-23.8037	-40.1001	-54.3213	-40.1306	-70.8008	-40.0696	-33.5693	-40.1001	-108.643	-40.0696	-36.0107	-40.0696	-43.9453	-40.1001	-41.5039	-40.1306	-29.9072	-40.1001	-35.4004	-40.1001	-50.6592	-40.1001	-44.5557	-40.1306	-54.3213	-40.1001	-31.1279	-40.1001
0.5065	-0.610352	-40.0696	-7.93457	-40.0696	-17.7002	-40.0696	-32.3486	-40.1306	-26.2451	-40.1001	-39.0625	-40.0696	-48.2178	-40.1001	-70.1904	-40.1001	-29.9072	-40.1001	-93.9941	-40.1306	-32.3486	-40.1306	-46.9971	-40.1001	-59.8145	-40.0696	-32.3486	-40.1001	-43.9453	-40.1001	-45.166	-40.1001	-56.7627	-40.1306	-40.2832	-40.0696	-36.6211	-40.1001
0.507	-0.610352	-40.1001	-16.4795	-40.1306	-25.6348	-40.1306	-18.3105	-40.1306	-28.6865	-40.1001	-28.6865	-40.1001	-39.0625	-40.1001	-77.5146	-40.1001	-26.2451	-40.1001	-110.474	-40.1001	-26.8555	-40.1306	-40.8936	-40.1001	-59.2041	-40.1001	-36.6211	-40.1306	-37.2314	-40.0696	-42.7246	-40.1001	-51.8799	-40.1001	-40.2832	-40.1001	-52.4902	-40.1001
0.5075	-26.8555	-40.1001	-11.5967	-40.1001	-21.3623	-40.1306	-33.5693	-40.1001	-18.3105	-40.0696	-21.9727	-40.1306	-50.0488	-40.0696	-50.0488	-40.1001	-27.4658	-40.1001	-106.812	-40.1001	-46.9971	-40.1001	-50.0488	-40.1306	-39.0625	-40.1306	-29.9072	-40.1001	-37.2314	-40.1001	-48.8281	-40.0696	-35.4004	-40.1001	-39.6729	-40.1001	-48.2178	-40.1306
0.508	-12.207	-40.1001	-16.4795	-40.1001	-24.4141	-40.1001	-32.3486	-40.1001	-17.7002	-40.1001	-45.7764	-40.0696	-49.4385	-40.1001	-67.1387	-40.1306	-15.8691	-40.1001	-116.577	-40.1001	-39.0625	-40.1001	-57.9834	-40.1001	-65.3076	-40.0696	-30.5176	-40.1001	-35.4004	-40.1001	-37.8418	-40.1001	-40.2832	-40.1001	-54.9316	-40.1001	-43.9453	-40.1001
0.5085	-15.2588	-40.1306	-26.2451	-40.1001	-16.4795	-40.1001	-12.207	-40.1001	-16.4795	-40.0696	-23.8037	-40.1001	-41.5039	-40.0696	-51.8799	-40.1001	-31.7383	-40.0696	-113.525	-40.1001	-24.4141	-40.1001	-39.6729	-40.1001	-50.6592	-40.1001	-37.2314	-40.1001	-37.2314	-40.1001	-40.8936	-40.1001	-40.8936	-40.0696	-49.4385	-40.1611	-53.7109	-40.1001
0.509	-8.54492	-40.1306	-20.1416	-40.1001	-23.8037	-40.1001	-15.2588	-40.1001	-20.1416	-40.1001	-17.7002	-40.1001	-37.2314	-40.0696	-63.4766	-40.1001	-52.4902	-40.1001	-104.37	-40.0696	-22.583	-40.1001	-41.5039	-40.1001	-51.2695	-40.1001	-33.5693	-40.1001	-39.6729	-40.1001	-48.2178	-40.1001	-48.2178	-40.1001	-56.7627	-40.1001	-51.8799	-40.1001
0.5095	-21.9727	-40.1001	-25.0244	-40.0696	-17.0898	-40.1001	-11.5967	-40.1001	-23.1934	-40.1001	-32.959	-40.1001	-48.8281	-40.1001	-66.5283	-40.1001	-22.583	-40.1306	-109.253	-40.1001	-34.1797	-40.1001	-36.0107	-40.1001	-42.7246	-40.1001	-38.4521	-40.0696	-34.1797	-40.1001	-58.5938	-40.1306	-50.0488	-40.0696	-43.9453	-40.1001	-45.166	-40.1001
0.51	-16.4795	-40.0696	-7.93457	-40.1001	-24.4141	-40.1001	-28.0762	-40.0696	-16.4795	-40.1306	-32.3486	-40.1306	-32.3486	-40.1001	-72.6318	-40.1001	-37.8418	-40.1306	-105.591	-40.1001	-31.7383	-40.1001	-35.4004	-40.0696	-56.1523	-40.1001	-29.2969	-40.1001	-42.1143	-40.1001	-50.0488	-40.1001	-28.0762	-40.1001	-51.2695	-40.1306	-39.6729	-40.1001
0.5105	-38.4521	-40.1001	-20.1416	-40.1001	-16.4795	-40.1001	-31.7383	-40.1001	-18.9209	-40.0696	-21.3623	-40.1001	-51.2695	-40.1001	-61.6455	-40.1001	-44.5557	-40.1306	-114.136	-40.1001	-43.335	-40.0696	-37.2314	-40.1001	-56.1523	-40.0696	-44.5557	-40.1306	-42.1143	-40.1001	-56.7627	-40.1001	-32.3486	-40.1001	-49.4385	-40.1001	-42.7246	-40.1001
0.511	-18.3105	-40.1001	-14.0381	-40.1001	-27.4658	-40.0696	-34.79	-40.1306	-20.752	-40.0696	-36.6211	-40.1306	-51.2695	-40.1001	-67.1387	-40.1306	-42.7246	-40.1001	-98.2666	-40.1001	-28.0762	-40.0696	-34.1797	-40.1306	-50.0488	-40.1001	-38.4521	-40.0696	-42.1143	-40.1001	-49.4385	-40.1001	-46.9971	-40.1001	-45.7764	-40.0696	-54.9316	-40.1001
0.5115	-21.3623	-40.1001	-4.88281	-40.1001	-21.3623	-40.1001	-18.3105	-40.1306	-20.1416	-40.1001	-37.8418	-40.1001	-34.1797	-40.0696	-83.6182	-40.1306	-39.6729	-40.1306	-108.643	-40.1001	-44.5557	-40.1001	-39.6729	-40.1001	-55.542	-40.0696	-28.0762	-40.0696	-34.79	-40.0696	-45.166	-40.0696	-35.4004	-40.1001	-38.4521	-40.0696	-43.335	-40.0696
0.512	-14.0381	-40.1001	-9.76563	-40.1306	-26.2451	-40.1001	-15.8691	-40.1001	-11.5967	-40.1306	-42.7246	-40.1001	-51.8799	-40.1001	-57.9834	-40.0696	-36.0107	-40.1001	-87.2803	-40.1001	-32.3486	-40.1001	-68.3594	-40.1001	-62.8662	-40.1306	-33.5693	-40.0696	-41.5039	-40.0696	-46.3867	-40.1001	-37.8418	-40.0696	-41.5039	-40.1001	-54.3213	-40.1001
0.5125	-24.4141	-40.1001	-9.15527	-40.1001	-15.2588	-40.0696	-32.3486	-40.1001	-22.583	-40.1001	-33.5693	-40.1001	-26.8555	-40.0696	-68.9697	-40.0696	-36.0107	-40.1001	-77.5146	-40.1001	-38.4521	-40.1001	-40.8936	-40.1001	-53.7109	-40.1001	-37.8418	-40.1001	-38.4521	-40.1001	-38.4521	-40.1306	-37.2314	-40.1001	-46.3867	-40.1306	-34.79	-40.1001
0.513	-25.0244	-40.1001	-14.6484	-40.1001	-16.4795	-40.1001	-25.6348	-40.1001	-18.3105	-40.0696	-40.2832	-40.0696	-38.4521	-40.1001	-68.9697	-40.1001	-35.4004	-40.1306	-103.76	-40.1611	-48.8281	-40.1001	-46.3867	-40.1001	-52.4902	-40.1001	-40.2832	-40.0696	-40.8936	-40.0696	-50.0488	-40.1001	-43.9453	-40.1001	-54.9316	-40.0696	-50.6592	-40.1001
0.5135	-24.4141	-40.0696	-23.1934	-40.0696	-20.1416	-40.1001	-20.752	-40.1001	-31.1279	-40.1001	-31.1279	-40.1001	-37.2314	-40.1306	-56.1523	-40.1306	-33.5693	-40.1001	-98.2666	-40.1001	-46.9971	-40.0696	-31.1279	-40.0696	-60.4248	-40.1306	-34.79	-40.1001	-46.9971	-40.0696	-51.8799	-40.1001	-35.4004	-40.1001	-41.5039	-40.1001	-37.2314	-40.0696
0.514	-23.8037	-40.1001	-10.376	-40.1001	-31.1279	-40.1001	-28.6865	-40.1001	0	-40.0696	-40.2832	-40.1001	-34.1797	-40.1001	-56.1523	-40.1001	-36.6211	-40.1001	-93.9941	-40.1001	-40.8936	-40.0696	-44.5557	-40.1001	-48.8281	-40.1001	-45.7764	-40.1001	-32.959	-40.0696	-45.7764	-40.1001	-42.1143	-40.1001	-36.6211	-40.1001	-64.6973	-40.1001
0.5145	-14.6484	-40.1306	-17.7002	-40.1001	-25.6348	-40.1001	-8.54492	-40.1001	-14.6484	-40.1001	-37.2314	-40.1001	-45.7764	-40.0696	-60.4248	-40.1001	-32.3486	-40.1306	-93.9941	-40.1001	-45.7764	-40.0696	-31.7383	-40.1001	-48.8281	-40.1001	-43.335	-40.0696	-36.0107	-40.0696	-40.8936	-40.1001	-42.1143	-40.1001	-42.1143	-40.1001	-59.8145	-40.1001
0.515	-28.0762	-40.1001	-22.583	-40.1306	-27.4658	-40.1001	-18.3105	-40.1001	-13.4277	-40.1001	-21.3623	-40.1001	-45.166	-40.1001	-75.0732	-40.1306	-42.1143	-40.0696	-97.0459	-40.1001	-53.7109	-40.1001	-53.1006	-40.1001	-60.4248	-40.1001	-36.0107	-40.1001	-28.0762	-40.1001	-40.2832	-40.1001	-36.0107	-40.0696	-46.3867	-40.1001	-43.335	-40.1001
0.5155	-24.4141	-40.1306	-33.5693	-40.0696	-19.5313	-40.1001	-24.4141	-40.1306	-21.3623	-40.0696	-39.0625	-40.1001	-40.2832	-40.1306	-79.3457	-40.0696	-34.1797	-40.0696	-104.37	-40.0696	-34.1797	-40.1001	-45.166	-40.1001	-52.4902	-40.0696	-35.4004	-40.1001	-39.6729	-40.1001	-54.3213	-40.1001	-37.2314	-40.0696	-45.166	-40.0696	-45.166	-40.1001
0.516	-25.0244	-40.1001	-20.752	-40.0391	-20.1416	-40.1001	-18.9209	-40.1001	-20.752	-40.1001	-42.1143	-40.0696	-41.5039	-40.1001	-67.1387	-40.1001	-49.4385	-40.1001	-100.098	-40.1001	-37.8418	-40.1001	-34.1797	-40.0696	-37.2314	-40.1001	-47.6074	-40.1001	-45.166	-40.0696	-44.5557	-40.0696	-42.7246	-40.1001	-52.4902	-40.1001	-56.1523	-40.1001
0.5165	-24.4141	-40.1001	-27.4658	-40.1306	-17.0898	-40.0696	-30.5176	-40.1001	-23.1934	-40.1306	-23.8037	-40.0696	-34.79	-40.1306	-66.5283	-40.1001	-42.1143	-40.1001	-92.7734	-40.1001	-30.5176	-40.1001	-23.1934	-40.1001	-39.6729	-40.1001	-40.8936	-40.1306	-43.335	-40.1001	-42.1143	-40.1001	-43.9453	-40.0696	-51.2695	-40.1001	-45.7764	-40.1001
0.517	-20.752	-40.1001	-11.5967	-40.1001	-17.0898	-40.1001	-24.4141	-40.1306	-33.5693	-40.1001	-26.2451	-40.1001	-36.6211	-40.1001	-71.4111	-40.1001	-43.9453	-40.0696	-104.98	-40.1001	-17.7002	-40.0696	-37.2314	-40.1001	-39.6729	-40.1001	-25.0244	-40.1306	-33.5693	-40.1001	-45.166	-40.1306	-42.7246	-40.1001	-44.5557	-40.0696	-48.2178	-40.1001
0.5175	-4.27246	-40.1001	-22.583	-40.1001	-20.1416	-40.1001	-21.9727	-40.1001	-22.583	-40.1001	-34.79	-40.1001	-31.7383	-40.0696	-80.5664	-40.0696	-42.1143	-40.1306	-70.8008	-40.0696	-39.0625	-40.1306	-48.2178	-40.1001	-56.1523	-40.1001	-32.3486	-40.1001	-42.7246	-40.1001	-46.3867	-40.1306	-50.0488	-40.1001	-34.1797	-40.1001	-56.1523	-40.1001
0.518	-28.6865	-40.1001	-40.8936	-40.1001	-18.9209	-40.1001	-20.752	-40.1306	-21.3623	-40.1001	-36.6211	-40.1001	-34.79	-40.1001	-54.3213	-40.1001	-43.9453	-40.1306	-90.332	-40.0696	-28.0762	-40.1001	-47.6074	-40.1001	-48.8281	-40.1001	-51.8799	-40.1001	-31.7383	-40.1306	-61.0352	-40.0696	-25.6348	-40.0696	-31.1279	-40.1001	-45.7764	-40.1001
0.5185	-16.4795	-40.1001	-17.0898	-40.0696	-12.8174	-40.1306	-28.0762	-40.0696	-35.4004	-40.1001	-20.1416	-40.1001	-38.4521	-40.1001	-62.8662	-40.1306	-52.4902	-40.1306	-78.7354	-40.1001	-25.0244	-40.1001	-45.166	-40.0696	-53.1006	-40.1001	-40.2832	-40.1001	-39.6729	-40.0696	-54.9316	-40.1001	-55.542	-40.1001	-37.2314	-40.0696	-62.2559	-40.1001
0.519	-28.0762	-40.0696	-28.6865	-40.1001	-14.0381	-40.1001	-26.2451	-40.1001	-19.5313	-40.1001	-28.6865	-40.0696	-48.2178	-40.1001	-70.8008	-40.1306	-32.3486	-40.1001	-101.929	-40.1001	-39.0625	-40.1001	-54.3213	-40.1001	-44.5557	-40.1001	-31.1279	-40.1001	-30.5176	-40.1001	-56.1523	-40.1001	-45.166	-40.1001	-39.0625	-40.1306	-46.3867	-40.0696
0.5195	-31.7383	-40.1001	-17.7002	-40.1306	-11.5967	-40.1001	-22.583	-40.1001	-34.1797	-40.1001	-31.7383	-40.1001	-38.4521	-40.1001	-65.3076	-40.1001	-20.752	-40.1001	-89.1113	-40.1306	-31.7383	-40.1001	-45.166	-40.1001	-50.0488	-40.0696	-45.7764	-40.1306	-34.1797	-40.1001	-45.166	-40.1001	-42.1143	-40.1001	-42.1143	-40.1001	-58.5938	-40.1001
0.52	-18.3105	-40.1001	-15.8691	-40.0696	-10.376	-40.1001	-10.9863	-40.0696	-26.2451	-40.1001	-28.6865	-40.1306	-37.8418	-40.1001	-61.6455	-40.1001	-32.3486	-40.0696	-89.1113	-40.1001	-35.4004	-40.0391	-43.335	-40.1001	-51.8799	-40.1001	-30.5176	-40.1001	-43.9453	-40.1001	-48.2178	-40.0696	-43.335	-40.1001	-37.2314	-40.1001	-48.8281	-40.1001
0.5205	-22.583	-40.1001	-20.1416	-40.1306	-21.9727	-40.1001	-16.4795	-40.1001	-34.1797	-40.1001	-32.3486	-40.1001	-42.7246	-40.1001	-45.7764	-40.1001	-41.5039	-40.1001	-112.915	-40.1001	-32.3486	-40.1001	-57.9834	-40.1001	-42.1143	-40.1001	-31.1279	-40.1001	-43.9453	-40.0696	-50.6592	-40.1001	-48.8281	-40.1306	-32.3486	-40.0696	-26.8555	-40.1001
0.521	-8.54492	-40.1001	-29.2969	-40.1001	-18.9209	-40.0696	-14.6484	-40.0696	-32.959	-40.1306	-29.9072	-40.0696	-44.5557	-40.0696	-75.6836	-40.0696	-42.7246	-40.1001	-104.98	-40.0696	-24.4141	-40.0696	-65.918	-40.0696	-43.9453	-40.1001	-35.4004	-40.1001	-38.4521	-40.0696	-62.8662	-40.1001	-45.166	-40.0696	-45.166	-40.1001	-60.4248	-40.1001
0.5215	-9.15527	-40.1001	-15.2588	-40.1001	-25.6348	-40.1001	-22.583	-40.0696	-25.0244	-40.1001	-23.1934	-40.1001	-44.5557	-40.1001	-48.8281	-40.1001	-50.0488	-40.1001	-96.4355	-40.1306	-36.6211	-40.1001	-40.2832	-40.1001	-45.166	-40.1001	-44.5557	-40.0696	-58.5938	-40.1306	-39.0625	-40.1001	-55.542	-40.0696	-47.6074	-40.1001	-61.6455	-40.1306
0.522	-27.4658	-40.0696	-14.6484	-40.1001	-16.4795	-40.1001	-15.2588	-40.1001	-30.5176	-40.1001	-23.1934	-40.1001	-43.335	-40.1001	-53.1006	-40.1001	-44.5557	-40.1001	-97.0459	-40.1001	-45.7764	-40.1001	-57.9834	-40.1001	-53.1006	-40.0696	-46.3867	-40.0696	-48.8281	-40.1001	-45.7764	-40.0696	-57.9834	-40.1001	-48.2178	-40.1306	-52.4902	-40.1306
0.5225	-17.0898	-40.1001	-21.3623	-40.1001	-18.3105	-40.1001	-11.5967	-40.0696	-31.1279	-40.1001	-35.4004	-40.1001	-39.0625	-40.1001	-50.6592	-40.1001	-49.4385	-40.1001	-106.201	-40.1001	-34.79	-40.1001	-44.5557	-40.1001	-38.4521	-40.0696	-37.2314	-40.0696	-39.6729	-40.0696	-54.3213	-40.0696	-55.542	-40.1001	-50.6592	-40.0696	-55.542	-40.1001
0.523	-25.6348	-40.1001	-23.8037	-40.1001	-3.66211	-40.1306	-7.32422	-40.1001	-29.9072	-40.1001	-47.6074	-40.1001	-48.2178	-40.1001	-56.7627	-40.1001	-42.7246	-40.1001	-95.2148	-40.1306	-39.0625	-40.1001	-59.8145	-40.1001	-54.3213	-40.0696	-33.5693	-40.1306	-31.1279	-40.1001	-56.1523	-40.0696	-62.8662	-40.1306	-33.5693	-40.1001	-60.4248	-40.0391
0.5235	-14.6484	-40.1001	-26.2451	-40.1306	-12.8174	-40.1001	-9.76563	-40.1001	-17.7002	-40.1001	-41.5039	-40.1001	-40.2832	-40.1306	-69.5801	-40.1306	-39.0625	-40.0696	-103.76	-40.1001	-42.1143	-40.1001	-47.6074	-40.1001	-43.335	-40.1001	-34.79	-40.1001	-34.1797	-40.1001	-44.5557	-40.1001	-54.3213	-40.1306	-46.9971	-40.1001	-51.8799	-40.1001
0.524	-24.4141	-40.1001	-15.8691	-40.1001	-20.752	-40.1001	-4.88281	-40.1001	-36.6211	-40.1001	-31.7383	-40.1001	-39.6729	-40.1001	-55.542	-40.1001	-34.1797	-40.1306	-99.4873	-40.1001	-22.583	-40.1001	-51.2695	-40.1306	-43.9453	-40.1001	-28.0762	-40.1306	-39.0625	-40.1306	-46.3867	-40.1001	-48.2178	-40.1001	-32.959	-40.1001	-48.2178	-40.1001
0.5245	-7.93457	-40.0696	-10.376	-40.1001	-21.9727	-40.1001	-12.8174	-40.1001	-25.0244	-40.1001	-37.2314	-40.0696	-36.6211	-40.1001	-41.5039	-40.1001	-47.6074	-40.0696	-93.9941	-40.1001	-21.9727	-40.0696	-41.5039	-40.1001	-35.4004	-40.1001	-31.7383	-40.1001	-25.0244	-40.0696	-43.335	-40.0696	-40.2832	-40.1001	-28.0762	-40.1001	-45.7764	-40.1001
0.525	-25.0244	-40.1306	-26.8555	-40.1001	-14.6484	-40.0696	-20.752	-40.0696	-19.5313	-40.1306	-28.0762	-40.1001	-51.2695	-40.1001	-57.373	-40.1001	-49.4385	-40.1306	-102.539	-40.1001	-33.5693	-40.0696	-48.8281	-40.1001	-54.3213	-40.1001	-39.0625	-40.0696	-40.8936	-40.1001	-46.3867	-40.1001	-48.8281	-40.1001	-26.8555	-40.1001	-46.3867	-40.0696
0.5255	-550.537	-80.0476	-423.584	-70.0684	-292.358	-60.0891	-158.691	-50.1099	-20.1416	-40.1001	72.6318	-30.0903	206.909	-20.1111	311.279	-10.1013	493.774	-0.12207	543.213	9.91821	728.76	19.8975	849.609	29.8767	928.955	39.917	1047.36	49.8962	1204.22	59.8755	1305.54	69.8547	1427	79.8645	1601.56	89.8438	1749.88	99.884
0.526	-98.2666	-80.0476	-65.918	-70.0684	-52.4902	-60.0891	-26.2451	-50.0793	-34.79	-40.1001	-18.9209	-30.0903	-7.93457	-20.1416	-2.44141	-10.1013	32.3486	-0.0915527	-6.71387	9.8877	52.4902	19.8975	79.9561	29.9072	95.8252	39.856	101.318	49.8657	121.46	59.906	159.302	69.8242	147.095	79.834	191.65	89.8438	242.92	99.884
0.5265	-73.2422	-80.0476	-45.166	-70.0684	-46.3867	-60.0891	-20.752	-50.0793	-14.6484	-40.0696	-19.5313	-30.0903	-14.6484	-20.0806	-30.5176	-10.0708	-8.54492	-0.0915527	-28.6865	9.8877	23.8037	19.8975	53.7109	29.8767	45.7764	39.8865	51.8799	49.8962	75.0732	59.845	85.4492	69.8853	88.501	79.8645	124.512	89.8743	181.274	99.8535
0.527	-71.4111	-80.0781	-35.4004	-70.0989	-29.9072	-60.0891	-20.752	-50.0793	-23.8037	-40.1001	-11.5967	-30.0903	-17.0898	-20.0806	-37.2314	-10.1318	-4.27246	-0.0915527	-21.3623	9.85718	16.4795	19.8669	10.9863	29.8767	33.5693	39.8865	45.7764	49.8962	55.542	59.8755	77.5146	69.8853	83.0078	79.8035	114.136	89.9048	177.002	99.823
0.5275	-69.5801	-80.0781	-43.9453	-70.0989	-50.0488	-60.0891	-23.8037	-50.1099	-26.8555	-40.0696	-27.4658	-30.0903	-18.3105	-20.1111	-46.9971	-10.1013	-8.54492	-0.0610352	-18.9209	9.8877	-4.88281	19.8975	32.959	29.8767	26.8555	39.8865	31.7383	49.8962	40.8936	59.8755	68.3594	69.8547	73.2422	79.895	99.4873	89.8438	151.367	99.8535
0.528	-67.1387	-80.0781	-32.3486	-70.0684	-40.8936	-60.0891	-19.5313	-50.0793	-25.6348	-40.0696	-28.0762	-30.0903	-21.9727	-20.0806	-29.9072	-10.1013	-1.2207	-0.0915527	-39.6729	9.8877	3.05176	19.8669	25.6348	29.8767	21.9727	39.8865	36.6211	49.8657	36.6211	59.845	50.6592	69.8547	52.4902	79.834	79.9561	89.8438	130.615	99.8535
0.5285	-59.2041	-80.0781	-40.2832	-70.0684	-27.4658	-60.0891	-20.1416	-50.0793	-36.0107	-40.0696	-28.0762	-30.0903	-26.2451	-20.1111	-37.2314	-10.1013	-19.5313	-0.12207	-29.2969	9.8877	17.0898	19.8975	3.05176	29.9072	14.0381	39.856	29.2969	49.8962	33.5693	59.8145	59.8145	69.8853	47.6074	79.8645	76.9043	89.8438	142.822	99.8535
0.529	-81.1768	-80.0476	-26.2451	-70.0989	-35.4004	-60.0891	-24.4141	-50.0793	-19.5313	-40.1001	-25.6348	-30.0903	-25.6348	-20.0806	-29.9072	-10.0708	-30.5176	-0.0915527	-46.3867	9.8877	-9.76563	19.8669	20.1416	29.9072	17.0898	39.856	34.1797	49.8962	29.9072	59.845	31.7383	69.8853	64.6973	79.8645	74.4629	89.8438	137.329	99.8535
0.5295	-61.0352	-80.0781	-36.6211	-70.1294	-34.1797	-60.0891	-18.9209	-50.0793	-20.752	-40.0696	-26.8555	-30.0903	-17.0898	-20.1111	-34.79	-10.1013	-20.752	-0.12207	-34.1797	9.8877	-10.9863	19.8669	9.15527	29.9377	8.54492	39.8865	30.5176	49.8962	25.6348	59.845	45.166	69.8853	58.5938	79.8645	59.2041	89.8743	115.967	99.8535
0.53	-57.9834	-80.0781	-35.4004	-70.0684	-27.4658	-60.0891	-20.752	-50.0793	-19.5313	-40.1001	-26.8555	-30.0903	-20.752	-20.1111	-27.4658	-10.0708	-14.6484	-0.12207	-26.2451	9.8877	3.05176	19.8669	11.5967	29.8767	0	39.8865	22.583	49.8657	21.9727	59.8755	43.9453	69.8853	60.4248	79.8645	78.125	89.8438	115.967	99.8535
0.5305	-65.918	-80.0476	-43.9453	-70.0989	-39.6729	-60.0891	-21.9727	-50.1099	-22.583	-40.1001	-18.3105	-30.0903	-22.583	-20.1111	-42.1143	-10.1013	-17.0898	-0.12207	-10.376	9.8877	1.2207	19.8364	10.9863	29.8462	13.4277	39.856	12.207	49.8657	16.4795	59.8755	34.79	69.8853	46.3867	79.834	63.4766	89.8743	123.291	99.8535
0.531	-41.5039	-80.0476	-37.2314	-70.0989	-42.7246	-60.1196	-29.2969	-50.1099	-27.4658	-40.0696	-23.8037	-30.1208	-26.8555	-20.0806	-32.959	-10.1013	-20.752	-0.12207	-16.4795	9.8877	-9.76563	19.8669	10.9863	29.8767	14.0381	39.8865	29.9072	49.8657	13.4277	59.8755	28.0762	69.8547	56.1523	79.834	57.9834	89.8438	112.305	99.8535
0.5315	-62.2559	-80.0476	-28.6865	-70.0989	-43.335	-60.0586	-19.5313	-50.0793	-28.6865	-40.1306	-23.1934	-30.0903	-15.8691	-20.0806	-26.8555	-10.1013	-29.9072	-0.12207	-26.2451	9.85718	-17.0898	19.8975	6.71387	29.8767	4.88281	39.8865	26.2451	49.8962	25.0244	59.845	28.6865	69.8547	50.0488	79.8645	56.1523	89.8743	109.253	99.8535
0.532	-70.8008	-80.0781	-28.6865	-70.0989	-25.6348	-60.0891	-28.0762	-50.1099	-17.7002	-40.1001	-19.5313	-30.0903	-15.8691	-20.1111	-37.2314	-10.1013	-28.0762	-0.0915527	-16.4795	9.85718	-3.05176	19.8975	10.376	29.8767	6.71387	39.8865	10.376	49.8657	23.8037	59.8755	39.0625	69.8547	50.0488	79.895	55.542	89.8132	121.46	99.8535
0.5325	-68.3594	-80.0476	-36.6211	-70.0989	-23.1934	-60.0891	-22.583	-50.0793	-20.1416	-40.0696	-39.6729	-30.0903	-14.6484	-20.0806	-40.8936	-10.1013	-20.1416	-0.0915527	-28.6865	9.8877	-10.9863	19.8975	1.83105	29.9072	5.49316	39.8865	11.5967	49.8962	17.0898	59.8755	24.4141	69.8242	52.4902	79.8645	50.6592	89.8438	116.577	99.884
0.533	-38.4521	-80.0781	-20.1416	-70.0684	-44.5557	-60.0891	-32.3486	-50.0793	-18.3105	-40.1001	-36.0107	-30.0903	-25.0244	-20.1111	-29.9072	-10.1013	-21.9727	-0.12207	-34.1797	9.91821	-3.66211	19.8669	12.8174	29.9072	0	39.856	14.0381	49.8962	19.5313	59.8755	32.959	69.8242	51.8799	79.834	65.918	89.8438	125.732	99.8535
0.5335	-30.5176	-80.0476	-45.166	-70.0684	-31.7383	-60.1196	-32.3486	-50.1099	-23.1934	-40.1306	-22.583	-30.1208	-29.9072	-20.1111	-24.4141	-10.0708	-26.2451	-0.12207	-31.1279	9.8877	-16.4795	19.8975	6.71387	29.8767	-1.2207	39.917	9.15527	49.8657	29.2969	59.8755	32.3486	69.8853	42.7246	79.834	60.4248	89.8438	109.863	99.8535
0.534	-61.6455	-80.0781	-23.1934	-70.0684	-26.2451	-60.0891	-21.9727	-50.0793	-17.0898	-40.0696	-29.9072	-30.0903	-16.4795	-20.0806	-37.2314	-10.1318	-17.0898	-0.12207	-29.2969	9.85718	-10.376	19.8669	6.10352	29.8767	-2.44141	39.8865	23.1934	49.8657	30.5176	59.8755	40.8936	69.8853	46.3867	79.834	56.7627	89.8743	107.422	99.8535
0.5345	-75.6836	-80.0476	-24.4141	-70.0684	-29.9072	-60.0891	-28.0762	-50.1099	-12.8174	-40.0696	-21.9727	-30.1208	-24.4141	-20.1111	-40.8936	-10.0708	-19.5313	-0.12207	-18.3105	9.8877	-4.88281	19.8669	1.83105	29.8767	2.44141	39.8865	20.752	49.8657	18.3105	59.845	32.3486	69.8547	50.6592	79.834	50.0488	89.8438	109.253	99.8535
0.535	-86.0596	-80.0476	-34.1797	-70.0989	-18.9209	-60.0586	-18.9209	-50.1099	-13.4277	-40.1001	-22.583	-30.0903	-21.3623	-20.1111	-37.8418	-10.1318	-12.8174	-0.12207	-12.8174	9.8877	-6.10352	19.8669	10.376	29.8767	4.27246	39.8865	9.15527	49.8657	3.66211	59.845	27.4658	69.8547	51.2695	79.8645	59.2041	89.8438	111.694	99.8535
0.5355	-70.8008	-80.0781	-48.2178	-70.0989	-34.1797	-60.0891	-27.4658	-50.1099	-7.32422	-40.0696	-25.6348	-30.0903	-33.5693	-20.0806	-39.0625	-10.1013	-14.0381	-0.0915527	-20.1416	9.8877	-12.8174	19.8669	5.49316	29.9072	1.2207	39.8865	11.5967	49.8352	18.3105	59.8755	28.6865	69.8547	58.5938	79.834	53.1006	89.8743	111.694	99.8535
0.536	-73.2422	-80.0781	-28.6865	-70.0989	-28.6865	-60.0891	-21.3623	-50.0793	-18.3105	-40.1001	-46.9971	-30.1208	-20.1416	-20.1416	-44.5557	-10.0708	-20.1416	-0.0915527	-15.2588	9.8877	-7.93457	19.8669	19.5313	29.9072	14.6484	39.8865	3.66211	49.8962	22.583	59.8145	19.5313	69.8853	43.9453	79.834	51.2695	89.8438	108.643	99.884
0.5365	-68.3594	-80.0781	-31.1279	-70.0684	-26.2451	-60.0891	-38.4521	-50.0793	-20.1416	-40.0696	-23.8037	-30.0903	-23.1934	-20.1111	-51.8799	-10.1013	-20.752	-0.0915527	-23.1934	9.8877	-8.54492	19.8975	2.44141	29.9072	9.15527	39.8865	3.05176	49.8657	20.1416	59.845	30.5176	69.8853	28.6865	79.834	64.6973	89.8438	98.877	99.884
0.537	-49.4385	-80.0476	-32.3486	-70.0989	-15.8691	-60.0891	-31.7383	-50.1099	-26.8555	-40.1001	-19.5313	-30.0598	-26.2451	-20.0806	-59.2041	-10.1013	-15.2588	-0.12207	-31.1279	9.8877	6.10352	19.8669	-15.2588	29.9072	15.8691	39.8865	12.207	49.8962	19.5313	59.8145	17.0898	69.8547	44.5557	79.895	53.1006	89.8438	88.501	99.8535
0.5375	-55.542	-80.0476	-34.1797	-70.0989	-32.959	-60.0891	-30.5176	-50.0793	-18.9209	-40.1001	-21.3623	-30.0903	-37.8418	-20.0806	-45.7764	-10.0708	-13.4277	-0.0915527	-28.0762	9.91821	-3.66211	19.8975	2.44141	29.9072	5.49316	39.8865	9.76563	49.8962	14.0381	59.8755	23.8037	69.8853	39.0625	79.834	60.4248	89.8743	90.9424	99.884
0.538	-71.4111	-80.0476	-32.959	-70.0989	-31.7383	-60.0586	-33.5693	-50.0793	-20.1416	-40.1001	-30.5176	-30.0598	-31.1279	-20.1416	-43.335	-10.1013	-24.4141	-0.12207	-23.1934	9.8877	1.83105	19.8364	10.376	29.8767	9.15527	39.8865	14.6484	49.8962	23.8037	59.906	26.2451	69.8853	45.166	79.8645	65.3076	89.8438	91.5527	99.8535
0.5385	-69.5801	-80.0476	-31.7383	-70.0989	-26.2451	-60.0891	-45.7764	-50.1099	-30.5176	-40.0696	-26.8555	-30.0903	-22.583	-20.1111	-28.6865	-10.1013	-23.1934	-0.0915527	-25.6348	9.8877	-2.44141	19.8669	-4.88281	29.8767	9.15527	39.8865	14.0381	49.8657	13.4277	59.8755	23.1934	69.9158	33.5693	79.8645	67.1387	89.8438	97.6563	99.7925
0.539	-64.6973	-80.0476	-39.6729	-70.0989	-20.752	-60.1196	-31.7383	-50.1099	-35.4004	-40.0696	-34.79	-30.0903	-15.2588	-20.0806	-35.4004	-10.1013	-21.9727	-0.12207	-22.583	9.8877	1.2207	19.8669	-15.2588	29.8767	6.10352	39.8865	7.32422	49.8657	26.8555	59.8755	23.1934	69.8547	38.4521	79.834	51.8799	89.8438	99.4873	99.8535
0.5395	-59.2041	-80.0781	-37.8418	-70.0989	-32.3486	-60.0586	-21.9727	-50.0793	-28.0762	-40.1001	-36.6211	-30.0903	-22.583	-20.1111	-42.7246	-10.1013	-18.9209	-0.0915527	-11.5967	9.85718	-11.5967	19.8975	3.66211	29.8767	12.8174	39.917	6.71387	49.8657	31.7383	59.8755	35.4004	69.8547	38.4521	79.8645	53.1006	89.8438	91.5527	99.8535
0.54	-62.2559	-80.0781	-42.7246	-70.0989	-30.5176	-60.0891	-12.8174	-50.0793	-31.1279	-40.1001	-19.5313	-30.0903	-30.5176	-20.1111	-18.3105	-10.1013	-21.9727	-0.0915527	-28.6865	9.8877	-4.27246	19.928	6.10352	29.8462	2.44141	39.8865	18.3105	49.8352	21.3623	59.8755	23.8037	69.8547	43.335	79.895	51.2695	89.8438	89.7217	99.884
0.5405	-49.4385	-80.0781	-28.6865	-70.0989	-37.8418	-60.1196	-31.1279	-50.1099	-28.6865	-40.1001	-21.3623	-30.0903	-23.8037	-20.0806	-47.6074	-10.1013	1.2207	-0.0915527	-23.1934	9.8877	-5.49316	19.8975	-3.05176	29.9072	13.4277	39.917	7.93457	49.8657	24.4141	59.845	32.3486	69.8242	30.5176	79.8645	56.1523	89.8438	88.501	99.884
0.541	-56.1523	-80.0781	-31.7383	-70.0684	-34.79	-60.0586	-30.5176	-50.0793	-28.0762	-40.1001	-18.3105	-30.0903	-20.752	-20.1111	-30.5176	-10.1318	-30.5176	-0.12207	-21.9727	9.8877	-3.05176	19.8975	-1.83105	29.9072	1.2207	39.8865	9.15527	49.8962	21.3623	59.8755	29.2969	69.8242	32.959	79.8645	60.4248	89.8743	86.6699	99.8535
0.5415	-53.1006	-80.0171	-34.1797	-70.0684	-17.7002	-60.0891	-20.1416	-50.0488	-25.0244	-40.1001	-17.0898	-30.0903	-34.79	-20.1111	-36.6211	-10.1013	-9.15527	-0.12207	-26.8555	9.8877	3.05176	19.8669	1.2207	29.9072	5.49316	39.8865	5.49316	49.8352	8.54492	59.8755	37.8418	69.8853	48.2178	79.8645	54.3213	89.8743	78.7354	99.884
0.542	-65.918	-80.0476	-45.7764	-70.1294	-18.3105	-60.0891	-19.5313	-50.0793	-12.207	-40.1001	-6.71387	-30.0903	-32.3486	-20.1111	-36.0107	-10.0708	-9.76563	-0.0915527	-28.0762	9.8877	-3.05176	19.8669	4.88281	29.9072	2.44141	39.917	5.49316	49.8657	1.2207	59.8755	31.7383	69.8547	34.79	79.834	58.5938	89.8743	87.2803	99.823
0.5425	-43.335	-80.0476	-37.8418	-70.0989	-28.0762	-60.0891	-23.1934	-50.0488	-18.3105	-40.0696	-29.9072	-30.0903	-19.5313	-20.1111	-49.4385	-10.1013	-14.6484	-0.12207	-26.8555	9.8877	-3.66211	19.8669	-6.10352	29.8767	0.610352	39.8865	0	49.8962	21.9727	59.845	32.3486	69.8853	33.5693	79.834	58.5938	89.8438	91.5527	99.8535
0.543	-51.2695	-80.0476	-37.2314	-70.0989	-20.752	-60.0891	-29.9072	-50.1404	-23.1934	-40.0696	-14.6484	-30.0903	-21.9727	-20.1111	-32.959	-10.1318	-15.2588	-0.0915527	-29.9072	9.8877	-0.610352	19.8975	-3.05176	29.8767	14.6484	39.917	2.44141	49.8657	23.8037	59.8755	28.0762	69.8547	45.166	79.8645	51.2695	89.8743	96.4355	99.823
0.5435	-62.2559	-80.0476	-39.0625	-70.1294	-35.4004	-60.0891	-29.2969	-50.1099	-21.9727	-40.0696	-21.3623	-30.0903	-13.4277	-20.1111	-56.7627	-10.1318	-14.6484	-0.0915527	-26.8555	9.8877	-14.6484	19.8975	-6.10352	29.9072	1.83105	39.8865	6.10352	49.8657	19.5313	59.8755	32.959	69.8853	39.6729	79.8645	64.0869	89.8438	86.0596	99.8535
0.544	-46.9971	-80.0781	-40.8936	-70.0989	-30.5176	-60.0891	-18.3105	-50.1099	-33.5693	-40.1306	-22.583	-30.0903	-25.0244	-20.1111	-36.0107	-10.1013	-28.6865	-0.0915527	-20.1416	9.8877	-1.83105	19.8975	-6.71387	29.9072	15.2588	39.8865	17.7002	49.8657	17.0898	59.8145	29.9072	69.8547	38.4521	79.8645	57.373	89.8743	90.332	99.8535
0.5445	-40.2832	-80.0476	-34.79	-70.0989	-16.4795	-60.0586	-33.5693	-50.0793	-29.9072	-40.1001	-15.2588	-30.0903	-20.1416	-20.0806	-40.2832	-10.0708	-14.0381	-0.12207	-22.583	9.8877	-4.27246	19.8669	-8.54492	29.8767	25.0244	39.917	7.32422	49.8657	20.1416	59.845	42.1143	69.8547	36.6211	79.8645	50.6592	89.8438	83.0078	99.8535
0.545	-40.2832	-80.0781	-24.4141	-70.0684	-33.5693	-60.0586	-29.9072	-50.0488	-21.3623	-40.0696	-18.9209	-30.0903	-15.2588	-20.05	-39.6729	-10.1013	-22.583	-0.0915527	-29.9072	9.91821	1.83105	19.8975	1.83105	29.8767	9.76563	39.917	6.71387	49.8657	20.752	59.8755	25.0244	69.8853	41.5039	79.8645	57.373	89.8438	98.877	99.8535
0.5455	-50.0488	-80.0781	-32.959	-70.0989	-34.79	-60.0891	-33.5693	-50.0793	-27.4658	-40.1001	-17.7002	-30.0903	-13.4277	-20.0806	-43.9453	-10.1318	-6.71387	-0.0915527	-30.5176	9.91821	14.6484	19.8669	-8.54492	29.8767	-7.93457	39.8865	6.10352	49.8962	15.8691	59.845	39.0625	69.8547	31.7383	79.834	52.4902	89.8438	92.1631	99.8535
0.546	-51.8799	-80.0476	-28.6865	-70.0684	-32.3486	-60.0891	-35.4004	-50.0793	-23.1934	-40.1001	-15.2588	-30.0903	-22.583	-20.1111	-22.583	-10.0708	-8.54492	-0.12207	-27.4658	9.8877	-6.10352	19.8975	-5.49316	29.8767	3.66211	39.8865	25.0244	49.8657	24.4141	59.8755	26.8555	69.8853	37.8418	79.834	63.4766	89.8438	92.1631	99.823
0.5465	-61.0352	-80.0476	-28.6865	-70.0684	-29.9072	-60.0891	-45.7764	-50.1099	-15.2588	-40.1001	-20.752	-30.1208	-29.2969	-20.0806	-56.1523	-10.1013	-14.0381	-0.12207	-39.6729	9.85718	0.610352	19.8975	7.32422	29.9072	13.4277	39.8865	20.1416	49.8962	21.3623	59.845	29.2969	69.8547	36.0107	79.8645	54.9316	89.8743	86.0596	99.8535
0.547	-45.7764	-80.0476	-45.7764	-70.0989	-25.0244	-60.0891	-29.2969	-50.1099	-12.8174	-40.0696	-16.4795	-30.1208	-23.1934	-20.05	-50.6592	-10.1013	-15.8691	-0.12207	-29.2969	9.8877	-3.66211	19.8975	3.05176	29.8462	-1.83105	39.8865	3.05176	49.8657	12.8174	59.845	29.9072	69.8853	40.2832	79.834	52.4902	89.8743	98.2666	99.823
0.5475	-51.2695	-80.0781	-34.79	-70.0989	-32.3486	-60.0891	-46.9971	-50.0793	-21.9727	-40.0696	-20.752	-30.1208	-15.8691	-20.1111	-43.9453	-10.1013	-6.71387	-0.0915527	-23.1934	9.8877	-2.44141	19.8975	2.44141	29.8767	7.93457	39.8865	8.54492	49.8962	20.752	59.8755	25.6348	69.8853	40.2832	79.834	43.9453	89.8743	96.4355	99.8535
0.548	-64.0869	-80.0476	-20.752	-70.0989	-39.0625	-60.0891	-39.0625	-50.0793	-20.752	-40.0696	-18.9209	-30.0598	-13.4277	-20.0806	-36.0107	-10.0708	-15.8691	-0.0915527	-38.4521	9.85718	-2.44141	19.8975	-6.71387	29.8767	-0.610352	39.8865	0.610352	49.8657	15.2588	59.845	29.9072	69.8242	32.959	79.8645	56.1523	89.8438	101.929	99.8535
0.5485	-60.4248	-80.1086	-29.2969	-70.0989	-30.5176	-60.1196	-25.6348	-50.1099	-34.1797	-40.1001	-32.959	-30.0598	-24.4141	-20.1111	-53.7109	-10.0708	-18.9209	-0.0915527	-38.4521	9.8877	0	19.8975	-6.10352	29.8767	-1.2207	39.8865	10.9863	49.8657	12.207	59.845	27.4658	69.8853	30.5176	79.8645	37.8418	89.8743	100.098	99.884
0.549	-54.3213	-80.0781	-23.8037	-70.0684	-38.4521	-60.0891	-23.8037	-50.0793	-6.10352	-40.0696	-31.1279	-30.0598	-25.0244	-20.1111	-21.3623	-10.1318	-25.0244	-0.12207	-28.6865	9.8877	-21.3623	19.8975	-5.49316	29.9072	1.83105	39.8865	4.88281	49.8657	9.76563	59.845	40.2832	69.8547	40.8936	79.8645	50.0488	89.8438	106.201	99.8535
0.5495	-63.4766	-80.0476	-24.4141	-70.0989	-29.2969	-60.0891	-23.1934	-50.0793	-15.8691	-40.1001	-21.9727	-30.0903	-21.9727	-20.1111	-48.8281	-10.1013	-16.4795	-0.12207	-36.6211	9.91821	-1.2207	19.8975	4.88281	29.8462	-1.2207	39.917	15.2588	49.8962	12.207	59.8755	42.7246	69.8547	47.6074	79.8645	46.3867	89.8132	91.5527	99.8535
0.55	-43.9453	-80.0476	-23.8037	-70.1294	-43.335	-60.0891	-23.8037	-50.0793	-16.4795	-40.1001	-24.4141	-30.1208	-17.0898	-20.0806	-42.1143	-10.1318	-10.9863	-0.0915527	-32.959	9.8877	0.610352	19.8669	-3.05176	29.8767	-7.93457	39.8865	4.27246	49.8962	10.9863	59.8755	34.1797	69.8853	42.1143	79.834	57.373	89.8743	96.4355	99.8535
0.5505	-62.8662	-80.0781	-28.6865	-70.0989	-32.3486	-60.0891	-31.7383	-50.0793	-34.79	-40.0696	-20.752	-30.0903	-23.1934	-20.0806	-40.2832	-10.1013	-23.1934	-0.12207	-36.6211	9.8877	-2.44141	19.8975	-12.207	29.8767	-1.83105	39.8865	15.2588	49.8657	5.49316	59.8755	31.1279	69.8242	45.7764	79.8035	58.5938	89.8743	96.4355	99.8535
0.551	-51.2695	-80.0781	-29.9072	-70.0989	-21.9727	-60.1196	-27.4658	-50.1099	-23.8037	-40.1001	-23.1934	-30.0903	-16.4795	-20.0806	-44.5557	-10.1013	-10.9863	-0.0915527	-28.0762	9.8877	-7.32422	19.8975	-7.93457	29.9072	0.610352	39.8865	6.10352	49.8962	1.83105	59.845	22.583	69.8547	29.9072	79.8645	42.1143	89.8438	98.877	99.8535
0.5515	-58.5938	-80.1086	-34.79	-70.0989	-37.2314	-60.1196	-32.3486	-50.0793	-15.8691	-40.1001	-32.959	-30.0903	-8.54492	-20.0806	-36.0107	-10.0708	-19.5313	-0.12207	-32.959	9.8877	4.88281	19.8669	2.44141	29.8462	0.610352	39.8865	9.15527	49.8657	9.76563	59.8755	23.8037	69.8547	49.4385	79.8645	46.9971	89.8743	86.6699	99.823
0.552	-63.4766	-80.0476	-38.4521	-70.0989	-34.1797	-60.0891	-38.4521	-50.1099	-26.8555	-40.0696	-36.0107	-30.0903	-28.0762	-20.1111	-32.959	-10.1013	-6.71387	-0.0915527	-20.1416	9.8877	-14.0381	19.8975	1.2207	29.8767	-7.32422	39.8254	17.7002	49.8657	17.0898	59.845	27.4658	69.8547	47.6074	79.834	45.7764	89.8743	105.591	99.884
0.5525	-56.1523	-80.0781	-28.0762	-70.0684	-26.8555	-60.0891	-23.8037	-50.1099	-25.0244	-40.1001	-21.9727	-30.0598	-24.4141	-20.1111	-46.3867	-10.1013	-14.0381	-0.0915527	-9.15527	9.8877	-7.32422	19.8669	5.49316	29.8767	-3.05176	39.917	15.8691	49.8657	5.49316	59.8145	23.1934	69.8547	37.8418	79.834	46.3867	89.8743	101.318	99.8535
0.553	-53.1006	-80.0476	-25.0244	-70.0989	-36.0107	-60.0891	-26.8555	-50.0793	-21.3623	-40.0696	-10.9863	-30.0903	-14.6484	-20.1111	-26.8555	-10.0708	0	-0.12207	-21.3623	9.91821	-7.32422	19.8975	12.8174	29.8767	-7.93457	39.856	6.10352	49.8962	6.10352	59.845	20.752	69.8547	50.6592	79.834	42.1143	89.8438	88.501	99.8535
0.5535	-59.2041	-80.0476	-25.0244	-70.0989	-39.6729	-60.0586	-40.8936	-50.0793	-13.4277	-40.1001	-25.6348	-30.0903	-16.4795	-20.0806	-39.0625	-10.1013	-24.4141	-0.12207	-32.959	9.91821	-4.27246	19.8669	-10.376	29.8767	-6.71387	39.8865	-7.93457	49.8657	11.5967	59.8755	18.9209	69.8853	37.2314	79.834	50.0488	89.8743	76.2939	99.884
0.554	-54.3213	-80.0476	-23.8037	-70.0989	-21.3623	-60.0586	-34.79	-50.1099	-20.752	-40.1001	-17.0898	-30.0903	-14.0381	-20.0806	-33.5693	-10.1013	-24.4141	-0.12207	-34.1797	9.91821	-2.44141	19.8669	-2.44141	29.8462	-10.376	39.8865	4.27246	49.8962	23.8037	59.8755	20.1416	69.8242	37.2314	79.8645	60.4248	89.8743	90.9424	99.8535
0.5545	-48.2178	-80.0476	-36.0107	-70.0684	-15.8691	-60.0891	-15.2588	-50.0793	-23.1934	-40.1001	-15.8691	-30.0903	-15.8691	-20.1111	-38.4521	-10.1013	-28.0762	-0.12207	-17.7002	9.85718	-4.27246	19.8975	-4.88281	29.8767	-0.610352	39.856	-1.83105	49.8962	21.9727	59.8755	14.0381	69.8547	40.2832	79.8645	57.373	89.8743	86.0596	99.823
0.555	-50.6592	-80.0781	-51.2695	-70.0989	-14.6484	-60.1196	-21.9727	-50.1099	-31.1279	-40.0696	-30.5176	-30.1208	-46.3867	-20.1111	-42.1143	-10.1013	-30.5176	-0.0915527	-24.4141	9.8877	-8.54492	19.8975	-10.376	29.8767	-0.610352	39.8865	10.376	49.8962	10.376	59.845	32.959	69.8242	38.4521	79.8645	45.7764	89.8438	83.0078	99.8535
0.5555	-46.3867	-80.0476	-39.0625	-70.0989	-20.1416	-60.0891	-25.6348	-50.1099	-15.8691	-40.1001	-35.4004	-30.0903	-39.0625	-20.1416	-37.8418	-10.1318	-20.1416	-0.12207	-34.1797	9.8877	-12.207	19.8975	3.66211	29.8767	8.54492	39.8865	9.76563	49.8657	13.4277	59.845	9.15527	69.8547	41.5039	79.8645	40.8936	89.8132	76.9043	99.823
0.556	-50.6592	-80.0476	-31.7383	-70.0989	-24.4141	-60.0891	-27.4658	-50.0793	-25.6348	-40.0391	-31.1279	-30.0903	-20.1416	-20.1111	-42.7246	-10.1013	-18.3105	-0.0915527	-25.0244	9.85718	-6.71387	19.8669	10.9863	29.9072	-9.15527	39.917	8.54492	49.8657	15.8691	59.8755	30.5176	69.8547	37.8418	79.834	41.5039	89.8743	91.5527	99.884
0.5565	-50.0488	-80.0781	-38.4521	-70.0989	-26.8555	-60.0891	-25.0244	-50.1099	-20.752	-40.0696	-31.7383	-30.0903	-6.71387	-20.1111	-37.8418	-10.1318	-17.0898	-0.12207	-24.4141	9.91821	-4.88281	19.8975	-6.71387	29.9072	-4.27246	39.856	12.207	49.8657	18.3105	59.8755	34.1797	69.8547	31.7383	79.8645	52.4902	89.9048	100.098	99.8535
0.557	-54.9316	-80.0476	-29.9072	-70.0684	-37.8418	-60.0586	-25.0244	-50.1099	-17.0898	-40.1001	-15.2588	-30.0598	-21.9727	-20.1416	-45.7764	-10.1013	-11.5967	-0.12207	-27.4658	9.91821	2.44141	19.8975	-10.376	29.9072	1.83105	39.856	8.54492	49.8962	13.4277	59.8755	26.8555	69.8547	35.4004	79.834	45.7764	89.8438	87.2803	99.8535
0.5575	-43.9453	-80.0476	-38.4521	-70.0989	-32.959	-60.0891	-29.9072	-50.1099	-30.5176	-40.1001	-25.6348	-30.0903	-38.4521	-20.0806	-34.79	-10.0708	-18.3105	-0.12207	-29.9072	9.8877	1.83105	19.8669	8.54492	29.8767	-13.4277	39.917	9.15527	49.8962	13.4277	59.8755	19.5313	69.8547	50.6592	79.8645	47.6074	89.8438	90.9424	99.8535
0.558	-50.0488	-80.0476	-43.335	-70.0684	-36.6211	-60.0891	-26.2451	-50.0793	-22.583	-40.1001	-36.0107	-30.0903	-26.2451	-20.1111	-42.7246	-10.1013	-19.5313	-0.12207	-33.5693	9.91821	3.05176	19.8669	1.2207	29.9072	6.71387	39.856	1.83105	49.8657	21.9727	59.8755	18.3105	69.8547	34.79	79.834	47.6074	89.8743	78.7354	99.823
0.5585	-60.4248	-80.0476	-19.5313	-70.0989	-26.2451	-60.0891	-30.5176	-50.0793	-23.1934	-40.1001	-28.6865	-30.0903	-25.6348	-20.1416	-47.6074	-10.1013	-10.376	-0.0915527	-34.79	9.8877	-4.27246	19.8669	-4.88281	29.9072	-9.15527	39.8865	2.44141	49.8962	14.6484	59.845	15.2588	69.8242	13.4277	79.8645	54.9316	89.8438	77.5146	99.8535
0.559	-59.2041	-80.0476	-34.1797	-70.0684	-32.959	-60.1196	-28.0762	-50.1099	-18.9209	-40.1001	-20.1416	-30.0903	-14.6484	-20.1111	-36.0107	-10.1318	-12.8174	-0.152588	-14.6484	9.85718	4.27246	19.8975	-17.7002	29.8462	4.88281	39.8865	0.610352	49.8657	23.8037	59.8755	15.2588	69.8853	37.2314	79.834	40.8936	89.8743	80.5664	99.8535
0.5595	-59.2041	-80.0781	-39.0625	-70.1294	-37.8418	-60.0891	-36.0107	-50.0793	-22.583	-40.1001	-10.9863	-30.1208	-20.1416	-20.1111	-48.2178	-10.1013	-20.1416	-0.0915527	-25.6348	9.85718	-6.71387	19.8669	-9.15527	29.9072	17.0898	39.8865	7.93457	49.8657	14.0381	59.845	30.5176	69.8547	45.7764	79.834	53.1006	89.8438	90.332	99.884
0.56	-55.542	-80.0476	-34.79	-70.0378	-37.2314	-60.0586	-23.1934	-50.0793	-31.7383	-40.0696	-17.7002	-30.0598	-29.2969	-20.1416	-36.0107	-10.0708	-28.0762	-0.0915527	-18.9209	9.8877	3.66211	19.9585	-6.71387	29.8767	7.32422	39.8865	5.49316	49.8657	14.0381	59.8755	14.0381	69.8547	37.2314	79.8645	44.5557	89.8743	87.2803	99.823
0.5605	-51.8799	-80.0476	-25.0244	-70.0989	-21.9727	-60.0891	-20.1416	-50.0793	-25.0244	-40.0696	-19.5313	-30.0598	-31.1279	-20.1111	-37.2314	-10.1013	-6.71387	-0.0915527	-34.1797	9.91821	-2.44141	19.8669	-7.32422	29.8767	10.9863	39.8865	4.88281	49.8962	20.1416	59.845	25.0244	69.8547	32.959	79.8645	48.8281	89.8438	93.3838	99.8535
0.561	-50.6592	-80.0781	-31.7383	-70.0684	-29.2969	-60.0891	-33.5693	-50.1099	-24.4141	-40.1001	-12.8174	-30.0598	-25.6348	-20.0806	-47.6074	-10.0708	-25.6348	-0.0915527	-18.3105	9.8877	3.05176	19.8975	-3.66211	29.9072	-3.05176	39.856	1.2207	49.8657	7.32422	59.8755	26.2451	69.8547	32.959	79.834	57.373	89.8743	75.6836	99.884
0.5615	-48.2178	-80.0476	-39.6729	-70.0684	-26.2451	-60.0586	-24.4141	-50.0793	-18.9209	-40.1306	-25.6348	-30.0903	-32.3486	-20.1111	-34.1797	-10.1013	-17.7002	-0.12207	-18.3105	9.91821	-2.44141	19.8975	-3.05176	29.9072	-1.83105	39.8865	5.49316	49.8962	15.8691	59.906	21.3623	69.8547	34.1797	79.834	72.6318	89.8438	81.1768	99.884
0.562	-70.8008	-80.0781	-47.6074	-70.0684	-37.2314	-60.0891	-33.5693	-50.0793	-19.5313	-40.1001	-28.6865	-30.0598	-15.2588	-20.1111	-36.6211	-10.1013	-29.9072	-0.12207	-32.959	9.85718	3.05176	19.8975	-10.376	29.8767	-1.2207	39.8865	4.27246	49.8962	21.3623	59.8755	13.4277	69.8853	34.1797	79.8645	51.2695	89.8438	87.2803	99.8535
0.5625	-54.9316	-80.0476	-42.1143	-70.0989	-29.2969	-60.1196	-37.2314	-50.1404	-14.0381	-40.0391	-32.959	-30.0598	-26.2451	-20.0806	-44.5557	-10.1013	-19.5313	-0.0915527	-20.752	9.85718	-7.93457	19.8975	-8.54492	29.8767	5.49316	39.8865	6.71387	49.8657	17.7002	59.8755	18.3105	69.8547	41.5039	79.834	48.8281	89.8438	101.929	99.8535
0.563	-52.4902	-80.0781	-29.2969	-70.0989	-30.5176	-60.0891	-32.959	-50.1099	-17.7002	-40.1001	-20.752	-30.0903	-17.7002	-20.1111	-42.7246	-10.1318	-19.5313	-0.0915527	-12.8174	9.8877	-1.83105	19.8669	-7.32422	29.8767	7.32422	39.8865	-5.49316	49.8962	26.2451	59.845	16.4795	69.8242	34.79	79.8645	40.8936	89.8438	85.4492	99.823
0.5635	-62.2559	-80.0476	-46.3867	-70.0989	-25.6348	-60.0891	-20.752	-50.1099	-21.9727	-40.1001	-27.4658	-30.0903	-34.1797	-20.1111	-36.6211	-10.1013	-30.5176	-0.0915527	-22.583	9.8877	0.610352	19.8975	-8.54492	29.8767	7.93457	39.8865	13.4277	49.8657	1.83105	59.845	33.5693	69.8853	42.1143	79.8645	48.8281	89.8438	80.5664	99.8535
0.564	-49.4385	-80.0781	-34.1797	-70.0989	-38.4521	-60.1196	-17.7002	-50.1099	-15.8691	-40.1001	-29.9072	-30.0903	-36.6211	-20.0806	-48.8281	-10.1318	-16.4795	-0.0915527	-19.5313	9.85718	-9.15527	19.928	-9.15527	29.8767	22.583	39.856	10.9863	49.8657	12.207	59.845	15.8691	69.8853	39.6729	79.8645	54.3213	89.8743	95.8252	99.8535
0.5645	-34.79	-80.0781	-30.5176	-70.0989	-39.6729	-60.0891	-12.8174	-50.0793	-15.2588	-40.1001	-25.6348	-30.0598	-20.752	-20.1416	-49.4385	-10.1318	-26.8555	-0.12207	-39.6729	9.91821	-0.610352	19.8975	-8.54492	29.8767	10.376	39.856	-2.44141	49.8657	6.71387	59.845	21.9727	69.8547	39.0625	79.834	55.542	89.8438	80.5664	99.884
0.565	-61.0352	-80.0476	-50.0488	-70.0989	-32.959	-60.0586	-32.959	-50.0488	-19.5313	-40.1001	-36.6211	-30.0598	-31.7383	-20.1111	-46.9971	-10.1013	-21.9727	-0.0915527	-16.4795	9.85718	-6.71387	19.8669	1.83105	29.8767	1.2207	39.856	-2.44141	49.8657	14.0381	59.8755	27.4658	69.8547	33.5693	79.834	54.9316	89.8743	85.4492	99.884
0.5655	-42.1143	-80.0781	-31.7383	-70.0684	-28.0762	-60.0891	-28.6865	-50.1099	-20.1416	-40.1001	-25.6348	-30.0903	-25.0244	-20.0806	-46.9971	-10.1013	-25.6348	-0.0915527	-32.3486	9.8877	-3.66211	19.8975	7.32422	29.9072	-3.05176	39.856	10.376	49.8962	20.1416	59.845	27.4658	69.8547	45.7764	79.834	60.4248	89.8438	82.3975	99.8535
0.566	-51.2695	-80.0476	-30.5176	-70.0989	-29.9072	-60.0891	-36.0107	-50.0793	-25.6348	-40.1611	-40.8936	-30.0903	-24.4141	-20.0806	-48.8281	-10.1013	-23.1934	-0.0915527	-23.8037	9.91821	-9.76563	19.8975	-3.66211	29.9072	-8.54492	39.8865	-2.44141	49.8962	10.376	59.845	15.2588	69.8547	51.2695	79.834	51.2695	89.8743	90.332	99.8535
0.5665	-48.2178	-80.0476	-36.6211	-70.0684	-26.2451	-60.0891	-20.1416	-50.1099	-19.5313	-40.1001	-19.5313	-30.0903	-23.8037	-20.0806	-67.1387	-10.1013	-9.76563	-0.12207	-18.9209	9.8877	-2.44141	19.8669	1.2207	29.8462	-0.610352	39.8865	8.54492	49.8962	10.376	59.8755	20.752	69.8853	40.8936	79.834	45.7764	89.8438	98.2666	99.823
0.567	-46.3867	-80.0171	-34.1797	-70.0989	-35.4004	-60.0891	-26.8555	-50.1099	-16.4795	-40.0696	-10.376	-30.0903	-27.4658	-20.1416	-49.4385	-10.1013	-29.2969	-0.0915527	-26.2451	9.8877	-12.207	19.8975	-12.8174	29.8767	0	39.856	6.10352	49.8962	18.3105	59.906	20.752	69.8547	45.166	79.8645	45.166	89.8438	111.694	99.8535
0.5675	-37.8418	-80.0781	-35.4004	-70.0989	-32.959	-60.0891	-26.8555	-50.0793	-41.5039	-40.1001	-18.9209	-30.0903	-30.5176	-20.0806	-44.5557	-10.1013	-32.959	-0.0915527	1.2207	9.8877	7.93457	19.8975	-4.27246	29.8767	6.10352	39.8865	16.4795	49.8657	13.4277	59.845	21.9727	69.8853	34.79	79.8645	53.1006	89.8438	97.6563	99.8535
0.568	-44.5557	-80.0476	-35.4004	-70.0684	-28.0762	-60.0891	-23.8037	-50.0793	-20.752	-40.1001	-10.376	-30.0903	-18.3105	-20.0806	-48.8281	-10.1013	-18.3105	-0.12207	-23.8037	9.85718	3.66211	19.8975	-0.610352	29.8462	12.207	39.917	15.2588	49.8657	15.2588	59.845	24.4141	69.8547	31.7383	79.8645	58.5938	89.8743	90.9424	99.8535
0.5685	-30.5176	-80.0781	-30.5176	-70.0989	-31.1279	-60.0891	-19.5313	-50.0793	-29.2969	-40.1001	-25.0244	-30.0598	-21.3623	-20.1111	-55.542	-10.1013	-32.959	-0.12207	-10.9863	9.8877	-4.27246	19.8975	-4.27246	29.8767	16.4795	39.856	8.54492	49.8962	23.8037	59.845	24.4141	69.8853	36.0107	79.834	50.6592	89.8438	101.318	99.8535
0.569	-37.2314	-80.0476	-31.7383	-70.0684	-36.0107	-60.0891	-36.0107	-50.0793	-25.0244	-40.1001	-32.3486	-30.0903	-29.9072	-20.1416	-54.9316	-10.0708	-11.5967	-0.0915527	-12.8174	9.8877	-15.2588	19.8975	-4.27246	29.9072	-1.83105	39.8865	9.15527	49.8962	-0.610352	59.845	32.959	69.8547	36.6211	79.834	45.7764	89.8743	79.3457	99.9146
0.5695	-17.7002	-80.0781	-21.3623	-70.0684	-23.1934	-60.0891	-21.3623	-50.0793	-16.4795	-40.1306	-23.8037	-30.0598	-14.0381	-20.0806	-41.5039	-10.1013	-21.9727	-0.0915527	-29.2969	9.8877	-3.05176	19.8669	-5.49316	29.9072	6.10352	39.8865	3.05176	49.9268	17.0898	59.845	28.0762	69.8242	45.166	79.8645	53.7109	89.8743	86.0596	99.823
0.57	-32.959	-80.0476	-28.0762	-70.0684	-20.1416	-60.0891	-39.6729	-50.0793	-32.959	-40.0696	-25.6348	-30.0903	-21.3623	-20.1111	-61.6455	-10.1013	-32.3486	-0.12207	-24.4141	9.85718	-10.9863	19.8669	-1.2207	29.8462	-1.83105	39.917	21.9727	49.9268	-4.27246	59.8755	24.4141	69.8547	42.1143	79.834	52.4902	89.8438	103.76	99.8535
0.5705	-43.335	-80.0476	-30.5176	-70.0684	-35.4004	-60.0891	-33.5693	-50.0793	-21.9727	-40.1001	-26.2451	-30.0903	-23.1934	-20.0806	-43.9453	-10.1318	-18.9209	-0.0915527	-18.3105	9.91821	-9.76563	19.8975	-6.10352	29.8767	-1.2207	39.8865	9.76563	49.8657	18.3105	59.845	23.1934	69.8853	32.3486	79.834	45.7764	89.8438	89.1113	99.8535
0.571	-46.3867	-80.0476	-21.9727	-70.0684	-15.2588	-60.0891	-23.1934	-50.1099	-7.32422	-40.1001	-28.6865	-30.0598	-22.583	-20.0806	-49.4385	-10.1013	-0.610352	-0.0915527	-27.4658	9.8877	-15.2588	19.8669	-1.2207	29.8767	-6.71387	39.8865	14.6484	49.8657	13.4277	59.845	15.8691	69.8853	31.7383	79.8645	53.7109	89.8743	101.318	99.8535
0.5715	-33.5693	-80.0781	-28.6865	-70.0684	-16.4795	-60.0891	-32.3486	-50.1099	-34.1797	-40.1001	-32.3486	-30.0903	-24.4141	-20.1111	-33.5693	-10.1318	-15.2588	-0.0915527	-31.7383	9.85718	-9.15527	19.8975	7.93457	29.8767	-1.83105	39.917	13.4277	49.8657	28.0762	59.845	23.8037	69.8853	27.4658	79.895	48.8281	89.8438	104.37	99.823
0.572	-50.6592	-80.1086	-21.9727	-70.0989	-36.6211	-60.1196	-33.5693	-50.1099	-27.4658	-40.0696	-29.9072	-30.0903	-23.8037	-20.1111	-34.1797	-10.1013	-28.6865	-0.12207	-26.2451	9.8877	-1.2207	19.8975	2.44141	29.8767	-6.71387	39.856	10.9863	49.8657	7.93457	59.845	21.3623	69.8242	44.5557	79.8645	44.5557	89.8743	85.4492	99.8535
[truncated: 2,055 more rows]

## Sheet: CALHM24 #2
Signals=	IN 0	10_Vm	IN 0	10_Vm	IN 0	10_Vm	IN 0	10_Vm	IN 0	10_Vm	IN 0	10_Vm	IN 0	10_Vm	IN 0	10_Vm	IN 0	10_Vm	IN 0	10_Vm	IN 0	10_Vm	IN 0	10_Vm	IN 0	10_Vm	IN 0	10_Vm	IN 0	10_Vm	IN 0	10_Vm	IN 0	10_Vm	IN 0	10_Vm	IN 0	10_Vm
[truncated: 3,201 more rows]

[truncated: 13 more sheets: Mock #1, Mock #2, Mock #3, CALHM1 #1, CALHM1 #2, CALHM1 #3, CALHM1 #4, CALHM2 #1, CALHM2 #2, CALHM4 #1, CALHM4 #2, CALHM13 #1, CALHM13 #2]
