# Supplementary material for: Structural features of heteromeric channels composed of CALHM2 and CALHM4 paralogs
Source: eLife. 2024 Jun 18;13:RP96138. doi: 10.7554/eLife.96138 (PMC11186629; doi:10.7554/eLife.96138)
Supplement: Figure 1—source data 1. [file elife-96138-fig1-data1.xlsx]

## Sheet: Figure 1A
						Elution Band	Intensity	Intensity ratio
						CALHM4_Venus_myc_SBP	30336	0.000465454
						CALHM6_myc_His	14.12
						CALHM4_Venus_myc_SBP	20289.7	0.0799173
						CALHM2_myc_His	1621.5
						CALHM6_Venus_myc_SBP	21077.9	0.0086332
						CALHM2_myc_His	181.97
