# Supplementary material for: Structural features of heteromeric channels composed of CALHM2 and CALHM4 paralogs
Source: eLife. 2024 Jun 18;13:RP96138. doi: 10.7554/eLife.96138 (PMC11186629; doi:10.7554/eLife.96138)
Supplement: Figure 1—source data 2. [file elife-96138-fig1-data2.xlsx]

## Sheet: Figure 1F
	Cm [pF]	I [pA]	Density pA/pF
Mock Ca2+	15	43.945	2.92967
Mock Ca2+	17	158	9.29412
Mock Ca2+	30	117.2	3.90667
CALHM1 Ca2+	25	1015.01	40.6004
CALHM1 Ca2+	20	389	19.45
CALHM1 Ca2+	30	895.39	29.8463
CALHM2 Ca2+	14.3	45.16	3.15804
CALHM2 Ca2+	13.2	83.61	6.33409
CALHM2 Ca2+	15	25.02	1.668
CALHM4 Ca2+	24.3	50.65	2.08436
CALHM4 Ca2+	15	126.34	8.42267
CALHM4 Ca2+	15	48.21	3.214
CALHM1/3 Ca2+	20	2362.06	118.103
CALHM1/3 Ca2+	19	1135.86	59.7821
CALHM2/4 Ca2+	16.18	31.74	1.96168
CALHM2/4 Ca2+	21.44	217.285	10.1346
CALHM2/4 Ca2+	18.75	52.49	2.79947
CALHM2/4 Ca2+	16.84	118.4	7.03088

## Sheet: CALHM24 Ca2+ #1
Signals=	IN 0	10_Vm	IN 0	10_Vm	IN 0	10_Vm	IN 0	10_Vm	IN 0	10_Vm	IN 0	10_Vm	IN 0	10_Vm	IN 0	10_Vm	IN 0	10_Vm	IN 0	10_Vm	IN 0	10_Vm	IN 0	10_Vm	IN 0	10_Vm	IN 0	10_Vm	IN 0	10_Vm	IN 0	10_Vm	IN 0	10_Vm	IN 0	10_Vm	IN 0	10_Vm
Time (s)	Trace #1 (pA)	Trace #1 (mV)	Trace #2 (pA)	Trace #2 (mV)	Trace #3 (pA)	Trace #3 (mV)	Trace #4 (pA)	Trace #4 (mV)	Trace #5 (pA)	Trace #5 (mV)	Trace #6 (pA)	Trace #6 (mV)	Trace #7 (pA)	Trace #7 (mV)	Trace #8 (pA)	Trace #8 (mV)	Trace #9 (pA)	Trace #9 (mV)	Trace #10 (pA)	Trace #10 (mV)	Trace #11 (pA)	Trace #11 (mV)	Trace #12 (pA)	Trace #12 (mV)	Trace #13 (pA)	Trace #13 (mV)	Trace #14 (pA)	Trace #14 (mV)	Trace #15 (pA)	Trace #15 (mV)	Trace #16 (pA)	Trace #16 (mV)	Trace #17 (pA)	Trace #17 (mV)	Trace #18 (pA)	Trace #18 (mV)	Trace #19 (pA)	Trace #19 (mV)
0	-76.9043	-40.0696	-59.8145	-40.1001	-82.3975	-40.1001	-97.0459	-40.1001	-117.188	-40.1001	-104.98	-40.1001	-104.98	-40.1001	-100.098	-40.1001	-81.7871	-40.1001	-114.136	-40.1001	-98.877	-40.0696	-91.5527	-40.1001	-108.643	-40.1001	-109.253	-40.0696	-93.3838	-40.1001	-137.329	-40.0696	-145.874	-40.1001	-126.343	-40.1001	-176.392	-40.1001
0.0005	-81.1768	-40.1001	-58.5938	-40.1001	-72.6318	-40.1001	-97.6563	-40.1001	-100.708	-40.1001	-87.2803	-40.1001	-111.084	-40.1001	-103.76	-40.1001	-81.1768	-40.1306	-127.563	-40.1001	-97.6563	-40.1001	-82.3975	-40.1001	-102.539	-40.1306	-114.136	-40.0696	-103.149	-40.1001	-121.46	-40.1001	-151.367	-40.1001	-133.667	-40.1001	-175.781	-40.0696
0.001	-66.5283	-40.1001	-60.4248	-40.0696	-66.5283	-40.0696	-100.708	-40.1306	-115.356	-40.1001	-106.201	-40.1001	-111.694	-40.1001	-117.798	-40.0696	-76.9043	-40.0696	-147.095	-40.1306	-115.356	-40.1001	-87.8906	-40.1001	-93.9941	-40.0696	-103.149	-40.1001	-87.2803	-40.1001	-109.863	-40.1001	-132.446	-40.1001	-117.188	-40.0696	-172.729	-40.1001
0.0015	-75.6836	-40.1306	-52.4902	-40.1306	-64.0869	-40.1001	-90.9424	-40.1001	-104.98	-40.1001	-89.7217	-40.0696	-118.408	-40.1306	-108.032	-40.0696	-77.5146	-40.1001	-128.784	-40.1001	-88.501	-40.0696	-101.318	-40.1001	-104.98	-40.1306	-95.8252	-40.1001	-95.8252	-40.1001	-112.915	-40.1001	-133.667	-40.1001	-114.136	-40.1001	-164.795	-40.0696
0.002	-75.0732	-40.0391	-61.0352	-40.1001	-59.2041	-40.1001	-101.929	-40.1306	-104.98	-40.1001	-94.6045	-40.1001	-89.7217	-40.1306	-100.098	-40.1001	-73.8525	-40.1001	-122.681	-40.1001	-95.8252	-40.1001	-104.37	-40.1306	-86.6699	-40.0696	-109.253	-40.0696	-95.2148	-40.1001	-128.174	-40.1001	-119.019	-40.0696	-131.836	-40.1306	-156.86	-40.1001
0.0025	-79.3457	-40.1001	-73.2422	-40.1001	-57.9834	-40.1001	-100.708	-40.1306	-99.4873	-40.1001	-108.032	-40.1001	-102.539	-40.1306	-99.4873	-40.1001	-81.1768	-40.1001	-125.122	-40.1306	-109.863	-40.0696	-94.6045	-40.1001	-95.2148	-40.0696	-106.812	-40.0696	-104.37	-40.1001	-119.629	-40.1306	-133.667	-40.1001	-131.226	-40.1001	-142.822	-40.1001
0.003	-79.3457	-40.1001	-70.8008	-40.1001	-56.7627	-40.1001	-99.4873	-40.1306	-112.915	-40.1001	-93.9941	-40.1306	-94.6045	-40.1001	-88.501	-40.1001	-76.2939	-40.1001	-122.07	-40.1001	-119.019	-40.1306	-97.0459	-40.1001	-103.149	-40.1001	-111.084	-40.1306	-97.0459	-40.1001	-110.474	-40.1001	-126.953	-40.1001	-114.746	-40.0696	-153.809	-40.1001
0.0035	-65.918	-40.1001	-76.2939	-40.1001	-72.6318	-40.0696	-96.4355	-40.1001	-122.681	-40.1001	-100.708	-40.1001	-98.877	-40.1001	-102.539	-40.1001	-83.0078	-40.1001	-122.681	-40.1001	-108.032	-40.1306	-89.1113	-40.1001	-95.8252	-40.1001	-120.239	-40.0696	-108.032	-40.0696	-117.798	-40.1001	-126.343	-40.1001	-130.615	-40.0696	-150.757	-40.1001
0.004	-83.0078	-40.0696	-72.0215	-40.1001	-74.4629	-40.1001	-93.3838	-40.0696	-109.253	-40.1001	-89.1113	-40.1001	-111.084	-40.1001	-112.915	-40.1306	-78.125	-40.0696	-120.85	-40.1306	-106.812	-40.1001	-85.4492	-40.1001	-108.643	-40.0696	-117.188	-40.1001	-113.525	-40.1001	-114.746	-40.1001	-137.329	-40.1001	-120.85	-40.1001	-143.433	-40.1001
0.0045	-73.8525	-40.1001	-71.4111	-40.1001	-64.6973	-40.1306	-94.6045	-40.1306	-127.563	-40.1001	-99.4873	-40.1001	-101.929	-40.1306	-103.149	-40.1001	-79.3457	-40.1306	-131.836	-40.1001	-104.98	-40.0696	-97.6563	-40.1001	-107.422	-40.1306	-115.356	-40.1001	-117.188	-40.1001	-123.901	-40.0696	-138.55	-40.1001	-122.681	-40.1001	-143.433	-40.0696
0.005	-79.9561	-40.1611	-70.8008	-40.1001	-59.2041	-40.1001	-93.3838	-40.1001	-106.201	-40.1001	-89.7217	-40.0391	-106.812	-40.1306	-92.1631	-40.1001	-81.1768	-40.1001	-112.915	-40.1001	-107.422	-40.1001	-94.6045	-40.1306	-106.201	-40.1001	-93.9941	-40.0696	-117.188	-40.1001	-102.539	-40.1001	-159.912	-40.1001	-124.512	-40.0696	-140.991	-40.1001
0.0055	-65.3076	-40.1306	-71.4111	-40.1001	-59.2041	-40.1306	-90.332	-40.1001	-109.253	-40.1306	-96.4355	-40.1001	-105.591	-40.1001	-115.356	-40.1001	-89.1113	-40.0696	-110.474	-40.1001	-101.929	-40.1001	-96.4355	-40.1306	-101.929	-40.1001	-97.6563	-40.1306	-91.5527	-40.1001	-114.746	-40.1001	-146.484	-40.1001	-118.408	-40.0696	-128.784	-40.1306
0.006	-76.2939	-40.1001	-67.1387	-40.1001	-79.9561	-40.1001	-111.694	-40.1306	-114.746	-40.0696	-88.501	-40.1001	-100.708	-40.0696	-99.4873	-40.0696	-76.9043	-40.0696	-106.812	-40.1001	-108.643	-40.1001	-97.6563	-40.0696	-100.098	-40.1001	-101.318	-40.1306	-122.681	-40.1001	-108.643	-40.0696	-148.315	-40.1001	-114.746	-40.0696	-140.381	-40.1001
0.0065	-83.0078	-40.1001	-52.4902	-40.0696	-76.9043	-40.1001	-100.708	-40.1001	-117.188	-40.1001	-94.6045	-40.0696	-108.032	-40.0696	-93.9941	-40.0696	-87.8906	-40.1001	-111.084	-40.0696	-108.032	-40.1001	-90.332	-40.1306	-107.422	-40.1001	-110.474	-40.1001	-103.76	-40.1001	-97.0459	-40.0696	-136.719	-40.0696	-119.629	-40.1001	-161.743	-40.1001
0.007	-82.3975	-40.1001	-71.4111	-40.0696	-61.0352	-40.1001	-100.098	-40.1001	-105.591	-40.0696	-83.0078	-40.1001	-112.915	-40.1001	-113.525	-40.1001	-61.0352	-40.0696	-104.37	-40.1001	-108.032	-40.1306	-99.4873	-40.1306	-104.37	-40.0696	-120.85	-40.1001	-95.2148	-40.1001	-97.6563	-40.1001	-133.057	-40.1001	-123.291	-40.0696	-153.198	-40.1001
0.0075	-75.0732	-40.1001	-78.125	-40.1001	-61.6455	-40.1306	-86.6699	-40.1001	-99.4873	-40.1001	-86.6699	-40.1001	-96.4355	-40.1001	-110.474	-40.1001	-64.6973	-40.1001	-130.615	-40.0696	-86.0596	-40.0696	-89.7217	-40.0696	-114.136	-40.1001	-115.356	-40.1001	-110.474	-40.1001	-106.201	-40.0696	-123.901	-40.0696	-123.291	-40.1001	-160.522	-40.1306
0.008	-64.0869	-40.1001	-73.8525	-40.1001	-56.1523	-40.1001	-94.6045	-40.1001	-108.643	-40.1001	-73.8525	-40.0696	-100.098	-40.1306	-106.812	-40.1001	-73.8525	-40.1306	-122.07	-40.0696	-98.877	-40.1001	-98.2666	-40.0696	-105.591	-40.1001	-127.563	-40.1001	-122.07	-40.1001	-122.681	-40.1001	-136.108	-40.0696	-112.305	-40.1001	-142.822	-40.0696
0.0085	-83.6182	-40.1001	-72.0215	-40.1306	-72.6318	-40.0696	-89.1113	-40.1001	-93.9941	-40.1001	-82.3975	-40.1001	-112.305	-40.1001	-120.85	-40.1306	-93.3838	-40.0696	-114.136	-40.1306	-105.591	-40.1001	-94.6045	-40.1001	-110.474	-40.1306	-129.395	-40.1001	-113.525	-40.1001	-125.122	-40.0696	-137.329	-40.1001	-120.239	-40.1001	-165.405	-40.0696
0.009	-74.4629	-40.1001	-76.9043	-40.1001	-68.3594	-40.1001	-109.863	-40.1001	-90.9424	-40.1001	-79.9561	-40.1001	-114.746	-40.1306	-100.098	-40.1001	-89.1113	-40.0696	-127.563	-40.1001	-100.098	-40.0696	-105.591	-40.1001	-90.332	-40.1001	-125.122	-40.1001	-114.136	-40.0696	-103.149	-40.1001	-126.343	-40.0696	-115.356	-40.1001	-145.874	-40.1001
0.0095	-75.6836	-40.1001	-59.8145	-40.0696	-62.8662	-40.0696	-97.0459	-40.1001	-94.6045	-40.1001	-78.7354	-40.1001	-119.019	-40.1001	-92.7734	-40.0696	-87.8906	-40.0696	-134.888	-40.1001	-103.76	-40.1001	-87.2803	-40.1001	-98.877	-40.1001	-125.732	-40.0696	-112.915	-40.1306	-117.798	-40.1001	-151.978	-40.1306	-115.967	-40.1001	-147.095	-40.1306
0.01	-67.1387	-40.1306	-78.7354	-40.1001	-52.4902	-40.1306	-120.239	-40.1001	-80.5664	-40.1001	-70.1904	-40.1001	-90.332	-40.1001	-115.356	-40.0696	-90.9424	-40.0696	-127.563	-40.0696	-93.9941	-40.0696	-98.877	-40.1001	-111.084	-40.1001	-118.408	-40.1001	-106.201	-40.1001	-133.057	-40.1001	-147.705	-40.1001	-133.667	-40.1001	-155.029	-40.1001
0.0105	-68.9697	-40.0696	-76.2939	-40.1001	-67.749	-40.0696	-88.501	-40.1306	-84.2285	-40.1001	-78.7354	-40.1001	-100.708	-40.0696	-115.356	-40.0696	-92.1631	-40.0696	-115.967	-40.1001	-101.929	-40.1001	-95.8252	-40.0696	-119.019	-40.1001	-120.239	-40.1001	-106.201	-40.1306	-119.629	-40.1306	-147.095	-40.1001	-128.174	-40.0696	-144.653	-40.1001
0.011	-67.749	-40.1001	-73.8525	-40.1001	-66.5283	-40.1001	-101.929	-40.1001	-81.7871	-40.1001	-65.918	-40.1001	-89.7217	-40.1001	-113.525	-40.1001	-90.9424	-40.1001	-121.46	-40.1306	-93.9941	-40.1306	-108.643	-40.1001	-114.746	-40.1001	-112.305	-40.1001	-107.422	-40.1001	-111.084	-40.0696	-129.395	-40.1001	-132.446	-40.0696	-155.029	-40.1001
0.0115	-79.9561	-40.1001	-86.6699	-40.0696	-63.4766	-40.1001	-115.356	-40.0696	-84.8389	-40.1001	-73.2422	-40.1306	-108.643	-40.1001	-112.305	-40.1306	-93.3838	-40.1001	-114.136	-40.0696	-99.4873	-40.1001	-89.1113	-40.1306	-119.019	-40.1001	-117.188	-40.1001	-105.591	-40.1001	-122.07	-40.1306	-144.043	-40.1001	-119.019	-40.1001	-173.34	-40.1001
0.012	-84.2285	-40.1001	-92.1631	-40.1001	-64.6973	-40.1001	-109.863	-40.1001	-79.9561	-40.1001	-91.5527	-40.1001	-104.98	-40.1001	-109.253	-40.1001	-83.0078	-40.1001	-101.318	-40.1001	-87.2803	-40.1001	-84.8389	-40.1306	-119.019	-40.1001	-122.681	-40.0696	-106.812	-40.0696	-126.953	-40.1001	-141.602	-40.1001	-126.953	-40.1001	-153.809	-40.1001
0.0125	-65.918	-40.1306	-73.2422	-40.1306	-67.1387	-40.1001	-100.708	-40.1001	-81.7871	-40.1001	-78.125	-40.0696	-93.9941	-40.1001	-119.629	-40.1001	-94.6045	-40.1001	-109.863	-40.0696	-89.7217	-40.1001	-95.2148	-40.1306	-134.888	-40.1001	-124.512	-40.1306	-94.6045	-40.1001	-128.174	-40.1001	-140.991	-40.0696	-141.602	-40.1001	-164.795	-40.1001
0.013	-73.8525	-40.1001	-76.9043	-40.1001	-72.0215	-40.0696	-111.694	-40.0696	-78.7354	-40.1001	-78.7354	-40.0696	-101.318	-40.1306	-114.746	-40.0696	-96.4355	-40.1306	-104.37	-40.1001	-99.4873	-40.0696	-100.098	-40.1001	-121.46	-40.1001	-117.188	-40.1306	-111.694	-40.1001	-125.122	-40.1001	-126.953	-40.1001	-137.939	-40.1306	-161.743	-40.0696
0.0135	-72.0215	-40.1001	-77.5146	-40.1001	-73.8525	-40.1001	-119.629	-40.1001	-90.332	-40.1001	-86.6699	-40.1306	-110.474	-40.1001	-100.708	-40.1001	-93.9941	-40.0696	-114.136	-40.1001	-114.746	-40.1001	-86.6699	-40.1001	-106.812	-40.1001	-131.226	-40.1001	-92.1631	-40.1001	-106.812	-40.0696	-141.602	-40.1001	-122.07	-40.1306	-140.381	-40.1001
0.014	-78.125	-40.1001	-70.1904	-40.1001	-76.2939	-40.1306	-119.019	-40.1001	-90.9424	-40.1306	-86.6699	-40.1001	-97.0459	-40.1001	-123.291	-40.1306	-102.539	-40.0696	-111.084	-40.1001	-95.2148	-40.1001	-90.9424	-40.1001	-103.76	-40.1306	-126.953	-40.0696	-108.032	-40.1001	-130.615	-40.1001	-133.057	-40.1001	-137.329	-40.1001	-154.419	-40.1001
0.0145	-52.4902	-40.1001	-63.4766	-40.1001	-81.1768	-40.1001	-123.291	-40.1306	-81.7871	-40.0696	-88.501	-40.1001	-91.5527	-40.1001	-128.784	-40.1001	-89.1113	-40.1001	-120.85	-40.1001	-103.149	-40.0696	-83.0078	-40.1001	-119.019	-40.1001	-117.188	-40.1001	-117.798	-40.1001	-106.812	-40.1001	-146.484	-40.1001	-138.55	-40.0696	-157.471	-40.0696
0.015	-78.125	-40.1001	-73.2422	-40.0696	-75.6836	-40.1001	-110.474	-40.1306	-84.2285	-40.1001	-66.5283	-40.1001	-101.318	-40.1001	-124.512	-40.1001	-83.0078	-40.1001	-120.85	-40.1001	-104.37	-40.1001	-87.2803	-40.1306	-98.2666	-40.0696	-127.563	-40.1306	-109.253	-40.1001	-117.188	-40.0696	-137.329	-40.1001	-135.498	-40.1001	-155.029	-40.1001
0.0155	-78.125	-40.1001	-76.9043	-40.1001	-79.3457	-40.1001	-126.953	-40.1001	-87.8906	-40.1001	-66.5283	-40.0696	-109.253	-40.1001	-125.732	-40.1001	-97.0459	-40.1001	-122.07	-40.1001	-101.929	-40.1001	-100.708	-40.1001	-104.37	-40.1611	-115.967	-40.1001	-100.708	-40.1001	-125.732	-40.1306	-145.874	-40.1001	-137.939	-40.0696	-158.081	-40.1306
0.016	-81.1768	-40.1306	-70.1904	-40.1306	-78.7354	-40.1001	-104.37	-40.1001	-99.4873	-40.1001	-67.749	-40.1001	-109.863	-40.1001	-98.2666	-40.1001	-80.5664	-40.1306	-112.915	-40.1306	-106.201	-40.0696	-100.708	-40.1001	-109.253	-40.1001	-117.188	-40.1001	-116.577	-40.1001	-126.343	-40.1001	-135.498	-40.1306	-120.85	-40.1001	-137.329	-40.1001
0.0165	-75.0732	-40.0696	-79.3457	-40.1001	-72.6318	-40.1001	-109.863	-40.0696	-95.8252	-40.1306	-73.8525	-40.0696	-105.591	-40.1001	-116.577	-40.1001	-94.6045	-40.0696	-115.967	-40.1001	-88.501	-40.1001	-85.4492	-40.1306	-98.2666	-40.1001	-105.591	-40.0696	-125.732	-40.0696	-107.422	-40.0696	-137.939	-40.1001	-139.16	-40.1306	-139.16	-40.0696
0.017	-62.8662	-40.1001	-86.0596	-40.0696	-88.501	-40.1306	-98.2666	-40.1001	-85.4492	-40.1001	-97.6563	-40.1001	-106.201	-40.1001	-97.0459	-40.1001	-102.539	-40.1001	-103.76	-40.0696	-120.85	-40.1001	-90.9424	-40.1001	-101.929	-40.1306	-117.798	-40.1001	-100.098	-40.1306	-120.85	-40.1001	-134.277	-40.1001	-140.991	-40.1001	-138.55	-40.0696
0.0175	-80.5664	-40.1306	-64.6973	-40.0696	-98.2666	-40.1001	-112.915	-40.1001	-90.9424	-40.1001	-72.6318	-40.1001	-108.032	-40.1001	-116.577	-40.1001	-95.2148	-40.1001	-117.188	-40.1001	-92.7734	-40.0696	-83.6182	-40.1001	-96.4355	-40.1001	-105.591	-40.1001	-111.694	-40.1306	-109.863	-40.1001	-140.381	-40.1001	-143.433	-40.1001	-140.381	-40.1001
0.018	-56.1523	-40.0696	-69.5801	-40.0696	-105.591	-40.1306	-120.85	-40.1001	-77.5146	-40.1001	-79.9561	-40.1306	-100.708	-40.0696	-95.8252	-40.0696	-97.0459	-40.1001	-97.6563	-40.1001	-95.2148	-40.1001	-93.3838	-40.1001	-102.539	-40.1001	-112.915	-40.1001	-102.539	-40.1001	-117.188	-40.1306	-132.446	-40.1306	-140.991	-40.1001	-150.757	-40.1306
0.0185	-84.2285	-40.1001	-89.1113	-40.1306	-95.8252	-40.1306	-118.408	-40.1001	-86.0596	-40.0696	-83.6182	-40.1001	-106.201	-40.1001	-118.408	-40.1306	-94.6045	-40.1001	-126.953	-40.1001	-119.019	-40.1001	-94.6045	-40.1001	-111.694	-40.1001	-110.474	-40.1001	-111.084	-40.1001	-119.019	-40.1001	-129.395	-40.1001	-131.226	-40.1001	-148.315	-40.1001
0.019	-59.2041	-40.1001	-76.9043	-40.1306	-93.9941	-40.1001	-111.694	-40.1001	-88.501	-40.1001	-77.5146	-40.1306	-120.239	-40.0696	-117.188	-40.1001	-84.8389	-40.1001	-114.746	-40.1306	-97.0459	-40.1001	-110.474	-40.1001	-122.681	-40.1001	-106.812	-40.0696	-102.539	-40.1001	-128.174	-40.1001	-140.991	-40.0696	-132.446	-40.1001	-151.978	-40.1001
0.0195	-63.4766	-40.1001	-64.6973	-40.1001	-92.7734	-40.1001	-108.032	-40.0696	-85.4492	-40.1001	-83.0078	-40.1001	-89.1113	-40.1001	-107.422	-40.1306	-91.5527	-40.1001	-120.239	-40.1306	-103.149	-40.1001	-106.812	-40.1001	-123.901	-40.1001	-104.98	-40.1001	-107.422	-40.0696	-117.798	-40.0696	-126.343	-40.1001	-128.784	-40.1306	-150.146	-40.1001
0.02	-72.0215	-40.1001	-76.9043	-40.1306	-97.6563	-40.1001	-106.201	-40.1306	-84.2285	-40.1306	-77.5146	-40.1001	-87.8906	-40.1001	-117.798	-40.1001	-90.332	-40.1001	-107.422	-40.1306	-93.3838	-40.1306	-98.877	-40.1001	-112.305	-40.1306	-105.591	-40.1001	-119.019	-40.0696	-121.46	-40.0696	-120.85	-40.1001	-122.07	-40.1001	-148.315	-40.1001
0.0205	-56.1523	-40.1001	-67.1387	-40.1001	-85.4492	-40.1001	-114.136	-40.1001	-90.332	-40.0696	-66.5283	-40.0696	-89.7217	-40.1001	-107.422	-40.1306	-78.7354	-40.1001	-114.136	-40.1001	-103.149	-40.0696	-104.37	-40.0696	-115.967	-40.1001	-89.1113	-40.1001	-107.422	-40.0696	-108.643	-40.1001	-134.888	-40.1001	-134.277	-40.1001	-137.329	-40.1001
0.021	-76.9043	-40.1001	-62.8662	-40.1001	-76.9043	-40.1001	-114.746	-40.1306	-82.3975	-40.1001	-83.0078	-40.0696	-95.2148	-40.0696	-128.784	-40.1001	-79.3457	-40.1001	-122.681	-40.1001	-111.694	-40.0696	-103.76	-40.1001	-128.174	-40.1001	-103.76	-40.1001	-86.0596	-40.0696	-117.188	-40.1001	-109.863	-40.1306	-141.602	-40.1306	-150.757	-40.1001
0.0215	-67.749	-40.0696	-74.4629	-40.0696	-68.9697	-40.1001	-111.084	-40.1001	-88.501	-40.1306	-91.5527	-40.0696	-126.953	-40.1001	-102.539	-40.1001	-83.6182	-40.0696	-122.07	-40.1306	-93.3838	-40.1001	-101.318	-40.1306	-122.07	-40.1001	-109.863	-40.1306	-107.422	-40.1001	-115.967	-40.0696	-118.408	-40.0696	-142.822	-40.1306	-142.822	-40.1001
0.022	-58.5938	-40.1001	-81.7871	-40.1001	-77.5146	-40.1306	-121.46	-40.1306	-88.501	-40.1001	-100.098	-40.1001	-104.98	-40.1001	-120.85	-40.1001	-81.7871	-40.1001	-120.85	-40.1001	-87.8906	-40.1001	-99.4873	-40.1306	-101.318	-40.1001	-96.4355	-40.1306	-110.474	-40.1306	-120.85	-40.1306	-144.043	-40.1306	-128.174	-40.1001	-143.433	-40.1001
0.0225	-76.2939	-40.1001	-70.8008	-40.1001	-78.125	-40.1306	-101.318	-40.1001	-92.1631	-40.1001	-87.2803	-40.1001	-106.812	-40.1001	-111.694	-40.1001	-91.5527	-40.0696	-142.212	-40.0696	-100.098	-40.1001	-109.863	-40.1001	-106.201	-40.0696	-111.084	-40.0696	-106.812	-40.1306	-117.798	-40.1001	-117.798	-40.0696	-143.433	-40.1001	-134.888	-40.1001
0.023	-87.8906	-40.1306	-86.0596	-40.1001	-93.3838	-40.1001	-113.525	-40.0696	-92.7734	-40.1001	-96.4355	-40.1001	-119.019	-40.0696	-93.3838	-40.1001	-98.877	-40.1001	-110.474	-40.1306	-92.7734	-40.1001	-115.356	-40.0696	-115.356	-40.1001	-109.863	-40.1001	-100.708	-40.1001	-115.356	-40.1001	-125.122	-40.1001	-129.395	-40.0696	-138.55	-40.1306
0.0235	-85.4492	-40.1001	-76.2939	-40.1001	-73.8525	-40.1001	-114.136	-40.1306	-89.7217	-40.1001	-91.5527	-40.1001	-108.643	-40.0696	-100.708	-40.1001	-78.7354	-40.1001	-104.98	-40.1306	-92.7734	-40.1001	-114.136	-40.1001	-96.4355	-40.1306	-122.07	-40.1001	-100.098	-40.1001	-128.174	-40.1001	-112.305	-40.1001	-128.174	-40.1001	-126.953	-40.1001
0.024	-80.5664	-40.1306	-83.0078	-40.1001	-81.7871	-40.1001	-92.1631	-40.0696	-95.8252	-40.0696	-96.4355	-40.1306	-103.76	-40.1306	-87.8906	-40.1001	-75.0732	-40.1001	-108.643	-40.1001	-114.746	-40.1001	-100.098	-40.1001	-113.525	-40.1001	-105.591	-40.1001	-109.253	-40.1001	-111.084	-40.0696	-128.784	-40.0696	-117.798	-40.1001	-133.667	-40.0696
0.0245	-72.0215	-40.1306	-73.2422	-40.0696	-85.4492	-40.1306	-100.098	-40.1001	-86.6699	-40.1001	-94.6045	-40.1001	-103.76	-40.1001	-72.0215	-40.1001	-56.7627	-40.1001	-109.863	-40.1306	-116.577	-40.1001	-93.9941	-40.1001	-100.708	-40.1001	-110.474	-40.1001	-115.967	-40.1001	-113.525	-40.0696	-119.629	-40.1001	-138.55	-40.1001	-141.602	-40.1001
0.025	-78.125	-40.1001	-75.6836	-40.0696	-77.5146	-40.1306	-86.6699	-40.0696	-98.2666	-40.1306	-97.0459	-40.1306	-110.474	-40.1001	-89.7217	-40.1001	-70.8008	-40.1306	-111.084	-40.1001	-111.694	-40.1001	-117.798	-40.1306	-117.188	-40.1306	-101.318	-40.1001	-98.877	-40.1001	-106.201	-40.1001	-125.122	-40.1001	-124.512	-40.1306	-142.212	-40.0696
0.0255	-87.2803	-40.1001	-72.6318	-40.0696	-75.6836	-40.1001	-93.3838	-40.1306	-90.332	-40.1001	-96.4355	-40.1001	-114.136	-40.1001	-114.746	-40.1001	-73.8525	-40.0696	-96.4355	-40.1001	-93.9941	-40.0696	-106.201	-40.1306	-117.188	-40.1001	-109.253	-40.1001	-104.37	-40.1001	-106.201	-40.1001	-117.798	-40.1001	-114.746	-40.1306	-153.809	-40.1001
0.026	-80.5664	-40.0696	-64.0869	-40.1001	-73.2422	-40.1001	-92.7734	-40.0696	-114.136	-40.1001	-95.8252	-40.1001	-109.863	-40.1001	-109.863	-40.1001	-78.125	-40.0696	-106.201	-40.1001	-101.929	-40.1001	-121.46	-40.1001	-120.239	-40.0696	-112.915	-40.1001	-100.098	-40.1001	-101.318	-40.1306	-137.939	-40.1306	-118.408	-40.1001	-146.484	-40.1001
0.0265	-75.6836	-40.1001	-55.542	-40.0696	-72.6318	-40.0696	-94.6045	-40.1306	-93.3838	-40.1001	-112.305	-40.1001	-99.4873	-40.1306	-102.539	-40.0696	-83.6182	-40.1001	-111.694	-40.0696	-103.76	-40.1306	-114.136	-40.1001	-118.408	-40.1306	-109.253	-40.1001	-111.694	-40.1001	-104.98	-40.1306	-122.07	-40.1001	-120.239	-40.0696	-136.719	-40.1306
0.027	-75.0732	-40.1306	-89.1113	-40.1306	-86.0596	-40.1001	-109.863	-40.0696	-128.784	-40.1001	-103.149	-40.1306	-107.422	-40.0696	-107.422	-40.1001	-71.4111	-40.0696	-104.98	-40.0696	-100.098	-40.1001	-112.305	-40.1001	-123.901	-40.1001	-106.201	-40.1001	-111.084	-40.1306	-114.746	-40.1001	-127.563	-40.1001	-112.915	-40.0696	-146.484	-40.1306
0.0275	-66.5283	-40.1001	-83.6182	-40.1001	-82.3975	-40.1001	-102.539	-40.1001	-90.332	-40.0696	-120.85	-40.1306	-99.4873	-40.1001	-112.915	-40.1001	-73.2422	-40.1001	-103.149	-40.1001	-96.4355	-40.1306	-110.474	-40.0696	-115.967	-40.1001	-117.188	-40.1001	-104.98	-40.1001	-103.76	-40.1001	-124.512	-40.1001	-113.525	-40.1001	-128.784	-40.1001
0.028	-87.2803	-40.1001	-75.6836	-40.1306	-64.0869	-40.1001	-95.8252	-40.1001	-79.9561	-40.1306	-90.9424	-40.1001	-90.332	-40.1001	-100.098	-40.1306	-75.0732	-40.0696	-105.591	-40.1001	-94.6045	-40.1001	-107.422	-40.1001	-126.343	-40.1306	-122.07	-40.1001	-108.643	-40.1001	-111.694	-40.1306	-132.446	-40.1001	-111.084	-40.1001	-140.381	-40.1001
0.0285	-73.2422	-40.1001	-81.1768	-40.1001	-74.4629	-40.1001	-81.1768	-40.1001	-95.2148	-40.1001	-84.8389	-40.1001	-109.253	-40.1001	-113.525	-40.1306	-87.2803	-40.1001	-105.591	-40.1001	-97.0459	-40.1001	-100.098	-40.1001	-131.226	-40.1001	-129.395	-40.1306	-100.098	-40.1001	-114.136	-40.1001	-115.356	-40.1001	-103.76	-40.1001	-145.874	-40.0696
0.029	-68.9697	-40.1001	-76.9043	-40.1001	-65.3076	-40.1001	-97.0459	-40.1001	-105.591	-40.1001	-102.539	-40.1306	-115.967	-40.1001	-103.76	-40.1001	-68.9697	-40.1001	-108.032	-40.1001	-109.253	-40.1001	-117.798	-40.1001	-129.395	-40.1001	-115.356	-40.1001	-109.863	-40.0696	-104.37	-40.0696	-121.46	-40.1001	-107.422	-40.1306	-161.133	-40.1001
0.0295	-76.9043	-40.1001	-57.9834	-40.1001	-67.1387	-40.0696	-92.7734	-40.1001	-90.9424	-40.1001	-108.643	-40.1001	-114.136	-40.1001	-96.4355	-40.1001	-85.4492	-40.1001	-107.422	-40.1001	-105.591	-40.1001	-110.474	-40.1001	-134.888	-40.1001	-129.395	-40.0696	-115.356	-40.0696	-125.732	-40.0696	-125.122	-40.1001	-115.356	-40.1001	-151.978	-40.1001
0.03	-66.5283	-40.0696	-68.3594	-40.1001	-61.6455	-40.1306	-103.76	-40.1001	-78.125	-40.1001	-92.7734	-40.0696	-98.877	-40.0696	-114.746	-40.1001	-97.6563	-40.1306	-115.967	-40.1001	-106.812	-40.1611	-94.6045	-40.1001	-119.019	-40.1001	-144.653	-40.1001	-114.136	-40.1001	-129.395	-40.1001	-134.277	-40.1001	-134.277	-40.1001	-144.043	-40.1001
0.0305	-84.2285	-40.1001	-60.4248	-40.0696	-76.2939	-40.1001	-97.6563	-40.1001	-80.5664	-40.1306	-85.4492	-40.1001	-117.188	-40.0696	-105.591	-40.0696	-91.5527	-40.0696	-103.76	-40.1001	-89.1113	-40.1001	-96.4355	-40.0696	-131.226	-40.1001	-119.629	-40.1306	-122.681	-40.1001	-114.746	-40.1306	-139.16	-40.1001	-112.305	-40.1001	-131.836	-40.1306
0.031	-75.6836	-40.1001	-50.0488	-40.1001	-76.9043	-40.1001	-76.9043	-40.0696	-80.5664	-40.1001	-93.3838	-40.1001	-111.084	-40.1306	-122.07	-40.1001	-83.0078	-40.0696	-99.4873	-40.0696	-98.877	-40.1001	-120.239	-40.1001	-112.305	-40.0696	-137.939	-40.1306	-116.577	-40.1001	-115.356	-40.1001	-119.629	-40.1001	-112.305	-40.0696	-136.719	-40.1001
0.0315	-81.1768	-40.1306	-89.7217	-40.1001	-76.2939	-40.1001	-98.877	-40.1001	-86.0596	-40.1001	-83.0078	-40.1001	-120.239	-40.1001	-120.239	-40.1306	-92.1631	-40.1001	-120.239	-40.1001	-92.7734	-40.1001	-102.539	-40.0696	-120.85	-40.0696	-128.174	-40.1001	-122.07	-40.1306	-118.408	-40.1001	-137.939	-40.1001	-119.629	-40.1001	-128.174	-40.1001
0.032	-82.3975	-40.1306	-69.5801	-40.1001	-87.2803	-40.0696	-100.708	-40.0696	-100.098	-40.0696	-97.6563	-40.1001	-105.591	-40.0696	-114.746	-40.1001	-97.6563	-40.1001	-112.305	-40.1001	-98.877	-40.0696	-94.6045	-40.1001	-125.122	-40.1001	-122.07	-40.1001	-108.643	-40.1001	-115.356	-40.0696	-134.277	-40.1001	-144.653	-40.1001	-150.757	-40.1001
0.0325	-84.8389	-40.1001	-65.3076	-40.1001	-103.76	-40.1001	-100.708	-40.0696	-87.2803	-40.1001	-75.6836	-40.0696	-103.76	-40.1001	-115.967	-40.1001	-89.7217	-40.1001	-123.901	-40.1001	-103.149	-40.1001	-102.539	-40.1001	-107.422	-40.1306	-140.381	-40.1001	-103.149	-40.1001	-117.798	-40.1001	-140.991	-40.1001	-128.174	-40.1001	-144.653	-40.0696
0.033	-78.125	-40.1001	-55.542	-40.1306	-83.6182	-40.1001	-97.6563	-40.1001	-84.8389	-40.1306	-88.501	-40.1001	-109.863	-40.1001	-109.253	-40.1001	-100.098	-40.1001	-114.136	-40.0696	-122.07	-40.1306	-98.2666	-40.0696	-108.643	-40.1306	-130.615	-40.1001	-113.525	-40.1001	-105.591	-40.1001	-161.743	-40.0696	-134.888	-40.1001	-138.55	-40.1001
0.0335	-86.6699	-40.1001	-78.7354	-40.1001	-92.1631	-40.1001	-109.863	-40.1001	-65.918	-40.1001	-83.0078	-40.1001	-111.084	-40.1001	-111.084	-40.0696	-93.3838	-40.1001	-97.6563	-40.1001	-99.4873	-40.1001	-107.422	-40.1001	-117.188	-40.1001	-126.953	-40.1306	-112.915	-40.1001	-125.732	-40.0696	-140.991	-40.1001	-123.291	-40.1306	-133.667	-40.1306
0.034	-77.5146	-40.0696	-81.7871	-40.1001	-94.6045	-40.1306	-86.0596	-40.1001	-81.7871	-40.1306	-83.6182	-40.1001	-89.1113	-40.1001	-106.201	-40.0696	-94.6045	-40.1001	-122.681	-40.1001	-97.6563	-40.1001	-92.1631	-40.1001	-128.784	-40.1001	-112.305	-40.1001	-115.967	-40.1001	-117.188	-40.0696	-142.212	-40.1001	-131.836	-40.0696	-148.926	-40.1306
0.0345	-73.8525	-40.1001	-85.4492	-40.1306	-93.3838	-40.1001	-109.863	-40.1306	-86.6699	-40.1001	-72.6318	-40.0696	-102.539	-40.0696	-100.708	-40.0696	-89.7217	-40.1306	-114.746	-40.1001	-108.032	-40.1001	-101.318	-40.0696	-115.967	-40.0696	-111.694	-40.1001	-112.305	-40.1001	-126.343	-40.1001	-136.108	-40.1001	-132.446	-40.1001	-158.081	-40.1001
0.035	-72.6318	-40.1001	-79.3457	-40.1306	-59.8145	-40.1001	-114.746	-40.0696	-76.9043	-40.0696	-90.332	-40.1001	-99.4873	-40.1001	-101.929	-40.1001	-89.7217	-40.0696	-120.85	-40.1001	-93.3838	-40.1306	-96.4355	-40.1001	-123.291	-40.0696	-126.953	-40.1001	-133.667	-40.1306	-124.512	-40.1001	-149.536	-40.1001	-150.757	-40.1001	-145.264	-40.1001
0.0355	-73.8525	-40.1001	-107.422	-40.1001	-72.0215	-40.1001	-114.136	-40.1001	-72.6318	-40.1001	-85.4492	-40.1306	-96.4355	-40.1306	-126.953	-40.1001	-105.591	-40.1001	-122.681	-40.1306	-108.032	-40.1001	-111.084	-40.1001	-137.329	-40.1306	-116.577	-40.1001	-114.746	-40.1001	-111.694	-40.1001	-147.095	-40.1001	-111.694	-40.1001	-158.081	-40.1001
0.036	-76.2939	-40.1001	-78.7354	-40.1306	-93.3838	-40.1001	-98.877	-40.1001	-92.7734	-40.1001	-90.332	-40.0696	-98.877	-40.1001	-137.939	-40.1001	-97.0459	-40.1306	-108.643	-40.1306	-87.8906	-40.1306	-103.149	-40.1001	-131.226	-40.1001	-116.577	-40.0696	-114.746	-40.1001	-123.291	-40.1001	-146.484	-40.1001	-136.719	-40.1001	-152.588	-40.1001
0.0365	-72.6318	-40.1306	-78.125	-40.1306	-84.2285	-40.0696	-103.76	-40.1001	-84.2285	-40.1001	-78.125	-40.1001	-103.149	-40.1001	-108.032	-40.1306	-86.0596	-40.1001	-117.188	-40.1001	-106.201	-40.0696	-117.188	-40.1001	-108.643	-40.1001	-104.98	-40.1001	-117.188	-40.1001	-131.836	-40.1001	-142.822	-40.1306	-130.005	-40.1001	-159.912	-40.0696
0.037	-68.9697	-40.1001	-84.2285	-40.1001	-94.6045	-40.1001	-106.812	-40.0696	-72.6318	-40.1001	-90.9424	-40.1001	-97.6563	-40.1001	-88.501	-40.0696	-95.2148	-40.1306	-113.525	-40.1001	-120.85	-40.1001	-96.4355	-40.0696	-121.46	-40.1001	-101.929	-40.1306	-108.643	-40.0391	-128.784	-40.1001	-153.809	-40.0696	-131.836	-40.1001	-164.185	-40.1001
0.0375	-87.8906	-40.1306	-68.3594	-40.1306	-78.125	-40.1001	-106.201	-40.1001	-74.4629	-40.1001	-80.5664	-40.1306	-104.98	-40.0696	-111.694	-40.1001	-91.5527	-40.1001	-108.032	-40.1001	-103.76	-40.1001	-104.37	-40.1001	-131.226	-40.1001	-114.136	-40.1001	-128.174	-40.1306	-120.85	-40.0696	-142.212	-40.1001	-139.16	-40.1306	-161.133	-40.1306
0.038	-75.6836	-40.1001	-82.3975	-40.0696	-93.9941	-40.1306	-114.136	-40.1306	-83.0078	-40.1001	-89.7217	-40.1306	-93.9941	-40.1306	-83.0078	-40.1001	-100.708	-40.0696	-112.915	-40.1001	-98.877	-40.1001	-121.46	-40.0696	-116.577	-40.0696	-116.577	-40.1306	-109.863	-40.1306	-115.967	-40.1001	-150.757	-40.1001	-147.095	-40.1001	-150.146	-40.0696
0.0385	-90.332	-40.1001	-76.2939	-40.1001	-86.6699	-40.1001	-106.812	-40.1001	-92.7734	-40.0696	-72.0215	-40.1001	-90.9424	-40.1306	-100.708	-40.1001	-82.3975	-40.0696	-103.76	-40.1001	-106.201	-40.1001	-113.525	-40.1001	-131.226	-40.0696	-125.732	-40.1001	-114.746	-40.1001	-110.474	-40.1001	-137.939	-40.1001	-155.029	-40.1001	-155.029	-40.1001
0.039	-75.0732	-40.1001	-72.0215	-40.1306	-86.6699	-40.0391	-101.318	-40.0696	-92.1631	-40.0696	-95.8252	-40.1001	-106.812	-40.1001	-112.915	-40.1306	-85.4492	-40.1001	-121.46	-40.1001	-106.201	-40.1001	-117.188	-40.1306	-115.967	-40.0696	-104.98	-40.1306	-108.643	-40.1001	-115.356	-40.1001	-159.302	-40.1306	-131.226	-40.1001	-169.067	-40.1306
0.0395	-92.1631	-40.1306	-70.8008	-40.1001	-93.9941	-40.0696	-98.2666	-40.1001	-86.0596	-40.1001	-93.9941	-40.1001	-90.9424	-40.1001	-97.0459	-40.1001	-95.8252	-40.0696	-108.032	-40.0696	-101.318	-40.1001	-115.356	-40.1001	-116.577	-40.0696	-114.746	-40.1001	-110.474	-40.1001	-114.746	-40.1001	-128.784	-40.0696	-138.55	-40.0696	-156.86	-40.1001
0.04	-72.0215	-40.1001	-72.0215	-40.1306	-100.708	-40.1001	-104.98	-40.0391	-106.201	-40.0696	-88.501	-40.1001	-95.2148	-40.1001	-104.98	-40.1306	-89.7217	-40.1001	-118.408	-40.1001	-100.098	-40.0696	-115.356	-40.1001	-115.967	-40.1001	-115.356	-40.1001	-109.863	-40.1001	-116.577	-40.0696	-131.836	-40.1306	-147.095	-40.1001	-153.198	-40.1001
0.0405	-87.8906	-40.1001	-74.4629	-40.1001	-78.125	-40.1001	-115.356	-40.1001	-99.4873	-40.1306	-87.2803	-40.1001	-109.253	-40.0696	-84.2285	-40.1306	-79.3457	-40.1001	-125.732	-40.1001	-117.798	-40.1306	-97.6563	-40.1001	-110.474	-40.1001	-123.901	-40.1001	-100.098	-40.0696	-113.525	-40.0696	-146.484	-40.1001	-154.419	-40.1001	-153.198	-40.1001
0.041	-85.4492	-40.1306	-70.8008	-40.1001	-70.1904	-40.1306	-117.188	-40.1001	-84.8389	-40.1306	-95.8252	-40.1001	-106.812	-40.1001	-103.76	-40.0696	-90.332	-40.1001	-117.188	-40.1306	-93.3838	-40.0696	-105.591	-40.1306	-124.512	-40.1001	-108.032	-40.0696	-104.98	-40.1306	-112.915	-40.1001	-141.602	-40.1001	-137.939	-40.0696	-146.484	-40.0696
0.0415	-75.0732	-40.0696	-65.918	-40.1001	-76.9043	-40.1001	-111.084	-40.1001	-83.0078	-40.1001	-103.149	-40.1001	-100.098	-40.1001	-101.929	-40.1001	-89.7217	-40.0696	-104.98	-40.1001	-107.422	-40.0696	-105.591	-40.1001	-110.474	-40.1001	-115.967	-40.0696	-100.708	-40.1001	-112.915	-40.0696	-130.615	-40.1001	-140.991	-40.1001	-154.419	-40.0696
0.042	-73.2422	-40.1306	-68.9697	-40.1001	-82.3975	-40.1001	-91.5527	-40.1001	-80.5664	-40.1001	-93.3838	-40.1001	-101.318	-40.1001	-88.501	-40.1001	-82.3975	-40.0696	-111.084	-40.1001	-100.098	-40.1001	-104.98	-40.1001	-92.7734	-40.1001	-113.525	-40.1001	-117.798	-40.1001	-106.812	-40.0696	-137.939	-40.1001	-144.653	-40.1001	-156.86	-40.0696
0.0425	-79.3457	-40.1001	-58.5938	-40.0696	-82.3975	-40.1001	-101.929	-40.1001	-84.2285	-40.1001	-82.3975	-40.1306	-103.76	-40.1001	-87.8906	-40.0696	-75.6836	-40.1001	-104.98	-40.1306	-115.967	-40.1001	-101.929	-40.1001	-117.188	-40.0696	-133.057	-40.1001	-106.201	-40.1001	-113.525	-40.1001	-147.095	-40.1001	-130.005	-40.0696	-156.86	-40.1001
0.043	-79.9561	-40.1001	-68.9697	-40.1001	-73.8525	-40.1001	-86.6699	-40.1001	-105.591	-40.1001	-75.6836	-40.1001	-90.9424	-40.1001	-81.1768	-40.1001	-82.3975	-40.1001	-108.032	-40.1001	-111.084	-40.0696	-104.98	-40.1001	-98.2666	-40.0696	-112.305	-40.1001	-119.019	-40.1001	-112.305	-40.1001	-141.602	-40.1001	-131.836	-40.0696	-151.978	-40.1001
0.0435	-76.9043	-40.1001	-62.2559	-40.1306	-76.9043	-40.1001	-92.7734	-40.0696	-95.2148	-40.1001	-82.3975	-40.1306	-94.6045	-40.1001	-88.501	-40.1001	-76.9043	-40.1001	-113.525	-40.1306	-93.3838	-40.0696	-108.032	-40.1306	-104.37	-40.1306	-106.201	-40.1001	-114.746	-40.1001	-117.188	-40.1001	-154.419	-40.0696	-129.395	-40.0696	-155.029	-40.1001
0.044	-70.8008	-40.1001	-69.5801	-40.1306	-62.2559	-40.1001	-77.5146	-40.1001	-99.4873	-40.1001	-90.332	-40.1001	-101.318	-40.1001	-84.8389	-40.1306	-84.8389	-40.1306	-93.3838	-40.0696	-109.253	-40.1001	-106.201	-40.1001	-114.136	-40.1001	-114.136	-40.0696	-106.201	-40.1306	-126.953	-40.1001	-133.667	-40.0696	-130.005	-40.1001	-148.315	-40.1001
0.0445	-89.7217	-40.1306	-62.2559	-40.0696	-79.3457	-40.1001	-73.8525	-40.1001	-98.2666	-40.1306	-83.0078	-40.1306	-92.7734	-40.1001	-82.3975	-40.1001	-78.125	-40.1001	-107.422	-40.1001	-101.929	-40.0696	-104.37	-40.1001	-117.188	-40.1001	-114.136	-40.1001	-118.408	-40.1001	-118.408	-40.1001	-151.367	-40.0696	-129.395	-40.1306	-156.86	-40.1001
0.045	-71.4111	-40.1001	-83.0078	-40.1001	-79.3457	-40.1001	-92.1631	-40.1001	-105.591	-40.1306	-84.8389	-40.1001	-98.2666	-40.1001	-88.501	-40.1001	-80.5664	-40.0696	-96.4355	-40.1001	-108.032	-40.1306	-112.305	-40.1001	-119.629	-40.1001	-111.084	-40.1001	-98.877	-40.1001	-125.732	-40.1001	-132.446	-40.1001	-131.226	-40.1001	-148.315	-40.1001
0.0455	-95.8252	-40.1306	-76.2939	-40.1001	-87.2803	-40.1306	-92.1631	-40.1001	-87.8906	-40.1001	-103.149	-40.1001	-96.4355	-40.0696	-98.877	-40.1001	-92.7734	-40.1001	-98.2666	-40.0696	-109.863	-40.1306	-105.591	-40.1001	-118.408	-40.0696	-132.446	-40.1001	-106.812	-40.1001	-123.901	-40.1001	-121.46	-40.1306	-130.005	-40.1001	-156.25	-40.1001
0.046	-87.8906	-40.1306	-54.3213	-40.0696	-86.0596	-40.1001	-97.0459	-40.1001	-87.2803	-40.1001	-94.6045	-40.1001	-94.6045	-40.1001	-93.9941	-40.1001	-84.2285	-40.1001	-99.4873	-40.0696	-110.474	-40.1001	-103.76	-40.1001	-111.084	-40.1001	-108.643	-40.1001	-115.356	-40.1001	-117.188	-40.1001	-124.512	-40.1001	-125.122	-40.1001	-177.002	-40.1001
0.0465	-81.7871	-40.1001	-57.9834	-40.1306	-85.4492	-40.1001	-93.9941	-40.1001	-87.2803	-40.1001	-82.3975	-40.1001	-100.708	-40.1001	-80.5664	-40.1001	-91.5527	-40.1001	-113.525	-40.1306	-107.422	-40.1001	-100.098	-40.1001	-122.681	-40.1001	-107.422	-40.1001	-119.019	-40.1001	-128.784	-40.1001	-146.484	-40.1001	-136.108	-40.1001	-146.484	-40.1306
0.047	-83.0078	-40.1001	-78.125	-40.1001	-78.7354	-40.0696	-102.539	-40.1001	-85.4492	-40.0696	-99.4873	-40.1306	-103.149	-40.0696	-104.37	-40.0696	-81.1768	-40.1001	-108.643	-40.0696	-117.188	-40.1001	-114.746	-40.1001	-112.915	-40.1001	-118.408	-40.1001	-129.395	-40.1001	-117.188	-40.1001	-116.577	-40.1001	-125.122	-40.1001	-137.939	-40.1306
0.0475	-83.6182	-40.1001	-78.7354	-40.1306	-76.2939	-40.1001	-91.5527	-40.1001	-97.6563	-40.0696	-83.0078	-40.1001	-98.2666	-40.1001	-101.318	-40.1001	-82.3975	-40.1001	-111.694	-40.0696	-117.798	-40.1306	-114.136	-40.1001	-106.201	-40.1001	-117.188	-40.1001	-128.784	-40.1001	-122.07	-40.1001	-117.798	-40.1001	-126.953	-40.0696	-136.719	-40.1306
0.048	-76.2939	-40.1001	-70.8008	-40.1306	-80.5664	-40.1001	-103.149	-40.1001	-84.2285	-40.1306	-93.3838	-40.1001	-104.37	-40.1001	-100.708	-40.1001	-53.7109	-40.1001	-115.967	-40.1001	-118.408	-40.1001	-114.746	-40.1001	-122.07	-40.1306	-140.991	-40.1001	-124.512	-40.1001	-130.615	-40.0696	-137.939	-40.0696	-150.757	-40.0696	-144.043	-40.0696
0.0485	-83.0078	-40.1001	-78.7354	-40.1001	-82.3975	-40.1306	-108.643	-40.1306	-90.332	-40.1306	-100.098	-40.1001	-111.694	-40.1001	-86.0596	-40.1001	-86.6699	-40.1001	-102.539	-40.1001	-97.6563	-40.1001	-123.291	-40.1001	-116.577	-40.1001	-137.329	-40.0696	-120.85	-40.1001	-130.615	-40.0696	-130.615	-40.1001	-137.329	-40.1001	-146.484	-40.1001
0.049	-73.8525	-40.1001	-84.8389	-40.1001	-80.5664	-40.1001	-112.915	-40.1001	-101.318	-40.0696	-94.6045	-40.1001	-111.084	-40.1306	-98.2666	-40.0696	-81.1768	-40.1001	-109.253	-40.1001	-100.098	-40.1001	-109.253	-40.1001	-119.629	-40.1001	-131.836	-40.1306	-118.408	-40.1001	-123.901	-40.1001	-143.433	-40.0696	-119.019	-40.0696	-161.743	-40.1001
0.0495	-76.2939	-40.1001	-74.4629	-40.0696	-64.6973	-40.1001	-122.681	-40.1001	-97.0459	-40.1001	-78.125	-40.1001	-115.967	-40.1306	-101.929	-40.0696	-98.2666	-40.1001	-106.201	-40.1001	-97.0459	-40.1001	-98.877	-40.1001	-111.694	-40.1001	-148.315	-40.1001	-123.901	-40.1001	-119.019	-40.0696	-148.926	-40.1001	-118.408	-40.1001	-145.874	-40.1001
0.05	-82.3975	-40.1001	-67.1387	-40.1001	-81.1768	-40.1001	-127.563	-40.1001	-77.5146	-40.1001	-84.2285	-40.0696	-114.136	-40.0696	-116.577	-40.1001	-97.0459	-40.1306	-128.784	-40.1001	-100.098	-40.1001	-93.3838	-40.1001	-120.85	-40.0696	-146.484	-40.0696	-123.901	-40.1001	-140.991	-40.1306	-147.095	-40.1001	-122.681	-40.1001	-146.484	-40.1306
0.0505	-72.0215	-40.1001	-67.1387	-40.0696	-84.8389	-40.1001	-115.967	-40.1001	-84.2285	-40.1001	-90.9424	-40.1001	-99.4873	-40.1001	-116.577	-40.1001	-72.6318	-40.1001	-111.694	-40.1001	-102.539	-40.1001	-109.253	-40.1001	-122.07	-40.1001	-139.16	-40.1001	-117.188	-40.1306	-147.095	-40.1306	-135.498	-40.1001	-114.746	-40.1001	-157.471	-40.1306
0.051	-82.3975	-40.1001	-73.2422	-40.0696	-86.0596	-40.1001	-108.032	-40.1001	-89.1113	-40.1001	-94.6045	-40.1306	-96.4355	-40.1306	-98.2666	-40.1001	-106.812	-40.1001	-111.084	-40.1001	-98.2666	-40.1001	-101.318	-40.1001	-98.2666	-40.1001	-140.991	-40.1001	-106.201	-40.1001	-143.433	-40.1001	-143.433	-40.0696	-125.122	-40.1001	-137.329	-40.1001
0.0515	-84.8389	-40.1001	-64.0869	-40.1001	-75.0732	-40.1001	-87.8906	-40.1001	-83.0078	-40.1001	-79.9561	-40.1001	-104.98	-40.1001	-108.032	-40.1306	-103.76	-40.1001	-104.37	-40.1001	-106.201	-40.1306	-100.098	-40.1001	-110.474	-40.1001	-140.381	-40.1001	-122.07	-40.0696	-135.498	-40.1306	-151.367	-40.1001	-135.498	-40.1001	-141.602	-40.1001
0.052	-81.7871	-40.1611	-56.7627	-40.1001	-76.9043	-40.1001	-92.1631	-40.0696	-101.929	-40.0696	-95.8252	-40.1001	-108.643	-40.0696	-111.694	-40.1001	-104.98	-40.1001	-112.305	-40.1001	-109.253	-40.1001	-95.2148	-40.1001	-120.239	-40.0696	-148.926	-40.1001	-120.239	-40.1001	-143.433	-40.0696	-153.198	-40.1001	-137.329	-40.0391	-162.354	-40.0696
0.0525	-93.3838	-40.0696	-65.918	-40.0696	-85.4492	-40.1306	-111.084	-40.0696	-89.7217	-40.1001	-83.6182	-40.1306	-87.8906	-40.1001	-147.705	-40.1001	-106.812	-40.0696	-114.746	-40.0696	-100.708	-40.1001	-91.5527	-40.1001	-115.356	-40.1306	-150.146	-40.1001	-110.474	-40.1306	-128.174	-40.1001	-146.484	-40.1001	-143.433	-40.1001	-150.146	-40.1001
0.053	-79.3457	-40.1001	-72.0215	-40.1306	-78.125	-40.1001	-111.694	-40.1001	-98.2666	-40.1001	-84.2285	-40.0696	-106.812	-40.1001	-145.874	-40.1001	-109.253	-40.1001	-107.422	-40.0696	-92.7734	-40.1001	-94.6045	-40.1001	-102.539	-40.0696	-158.081	-40.1001	-127.563	-40.1001	-145.264	-40.1001	-151.978	-40.1001	-128.174	-40.1001	-147.095	-40.1306
0.0535	-78.125	-40.1001	-77.5146	-40.1001	-77.5146	-40.1306	-106.201	-40.1306	-90.332	-40.1306	-79.9561	-40.1306	-98.2666	-40.1306	-137.329	-40.1001	-97.6563	-40.1306	-104.98	-40.0696	-121.46	-40.1001	-79.3457	-40.1001	-100.098	-40.1001	-133.057	-40.1001	-113.525	-40.1306	-124.512	-40.1001	-164.185	-40.1001	-126.343	-40.1001	-150.146	-40.1001
0.054	-66.5283	-40.0696	-72.6318	-40.0696	-84.2285	-40.1306	-101.929	-40.1306	-95.2148	-40.0696	-80.5664	-40.1001	-95.2148	-40.1001	-137.939	-40.1001	-87.8906	-40.0696	-103.149	-40.1001	-101.929	-40.1001	-90.9424	-40.1001	-110.474	-40.0696	-152.588	-40.0696	-117.798	-40.1001	-118.408	-40.1001	-150.146	-40.1001	-120.239	-40.1001	-155.64	-40.1306
0.0545	-57.9834	-40.1001	-86.6699	-40.1001	-86.6699	-40.1306	-103.76	-40.1001	-98.877	-40.1001	-83.6182	-40.1001	-112.305	-40.1001	-128.174	-40.1001	-93.9941	-40.0696	-105.591	-40.1001	-98.2666	-40.1306	-100.098	-40.1001	-106.812	-40.1001	-137.939	-40.1306	-125.122	-40.1001	-127.563	-40.1001	-146.484	-40.1001	-128.784	-40.0696	-167.236	-40.1306
0.055	-62.8662	-40.1001	-72.0215	-40.1001	-81.1768	-40.1001	-103.76	-40.1306	-94.6045	-40.0696	-70.1904	-40.1001	-85.4492	-40.0696	-109.253	-40.1001	-93.3838	-40.1001	-92.7734	-40.1001	-95.8252	-40.1001	-98.877	-40.0696	-98.877	-40.1001	-153.198	-40.0696	-127.563	-40.1001	-124.512	-40.1306	-146.484	-40.1306	-134.277	-40.1001	-156.86	-40.1306
0.0555	-79.9561	-40.1001	-68.3594	-40.1306	-73.8525	-40.1001	-103.149	-40.1001	-87.8906	-40.1001	-68.9697	-40.1001	-96.4355	-40.1306	-115.356	-40.1306	-90.9424	-40.0696	-114.746	-40.1306	-101.318	-40.1306	-106.201	-40.1001	-101.929	-40.1306	-142.212	-40.0696	-111.694	-40.1001	-129.395	-40.0696	-150.146	-40.1001	-125.732	-40.1001	-150.757	-40.1001
0.056	-73.2422	-40.1306	-71.4111	-40.1001	-79.9561	-40.1001	-112.915	-40.1001	-93.3838	-40.1306	-72.0215	-40.1001	-102.539	-40.0696	-93.3838	-40.1001	-94.6045	-40.1306	-114.746	-40.0696	-88.501	-40.1001	-90.332	-40.1001	-93.9941	-40.1306	-130.615	-40.1001	-125.732	-40.1001	-147.705	-40.1001	-145.874	-40.1001	-117.188	-40.1001	-162.964	-40.1001
0.0565	-85.4492	-40.1306	-72.0215	-40.1001	-67.1387	-40.1001	-100.098	-40.1001	-96.4355	-40.1306	-86.0596	-40.1001	-106.812	-40.1001	-96.4355	-40.1001	-73.8525	-40.1001	-109.253	-40.1001	-90.9424	-40.0696	-88.501	-40.1306	-119.629	-40.1001	-106.201	-40.0696	-112.915	-40.1306	-142.822	-40.1001	-137.329	-40.1001	-148.926	-40.1001	-168.457	-40.1001
0.057	-77.5146	-40.1001	-75.6836	-40.1306	-84.2285	-40.1001	-121.46	-40.1001	-92.7734	-40.1306	-90.332	-40.1001	-94.6045	-40.1001	-94.6045	-40.1001	-95.8252	-40.1306	-121.46	-40.1001	-112.915	-40.0696	-89.1113	-40.1001	-95.8252	-40.1001	-108.643	-40.1001	-122.681	-40.1306	-137.329	-40.0696	-144.653	-40.1001	-136.719	-40.0696	-157.471	-40.1001
0.0575	-62.2559	-40.0696	-62.2559	-40.1001	-83.0078	-40.1306	-109.253	-40.1001	-98.2666	-40.1001	-75.0732	-40.1001	-106.201	-40.1001	-91.5527	-40.1306	-92.7734	-40.0696	-115.356	-40.1001	-97.0459	-40.1306	-101.929	-40.1001	-103.76	-40.1001	-125.732	-40.1001	-123.901	-40.1001	-126.953	-40.1001	-166.016	-40.1001	-120.85	-40.1001	-160.522	-40.1001
0.058	-78.125	-40.1001	-74.4629	-40.1001	-84.2285	-40.1001	-113.525	-40.1306	-93.3838	-40.0696	-75.6836	-40.1001	-103.149	-40.1001	-119.629	-40.1001	-88.501	-40.1001	-124.512	-40.1001	-92.1631	-40.1001	-91.5527	-40.1001	-112.915	-40.1001	-127.563	-40.0696	-103.76	-40.1001	-120.239	-40.1306	-147.095	-40.0696	-125.122	-40.1001	-147.095	-40.1001
0.0585	-71.4111	-40.1001	-61.6455	-40.1001	-75.6836	-40.1001	-127.563	-40.1001	-89.7217	-40.0696	-83.6182	-40.1001	-101.929	-40.1306	-98.2666	-40.1001	-87.2803	-40.1001	-114.136	-40.0696	-108.032	-40.0696	-106.812	-40.1001	-98.2666	-40.1001	-128.174	-40.1306	-111.694	-40.0696	-129.395	-40.1001	-155.64	-40.1001	-137.939	-40.1001	-175.171	-40.1001
0.059	-67.1387	-40.0696	-68.3594	-40.1001	-76.9043	-40.1306	-122.07	-40.1306	-81.1768	-40.1001	-97.6563	-40.1001	-94.6045	-40.1001	-94.6045	-40.1306	-101.318	-40.1001	-130.005	-40.1001	-115.356	-40.0696	-93.3838	-40.0696	-87.2803	-40.1001	-139.771	-40.1001	-95.8252	-40.1001	-144.043	-40.1306	-166.016	-40.1306	-127.563	-40.1001	-164.185	-40.1306
0.0595	-87.2803	-40.1306	-53.1006	-40.1001	-88.501	-40.1001	-104.98	-40.1001	-89.1113	-40.1306	-70.1904	-40.0696	-95.8252	-40.1001	-101.318	-40.1001	-96.4355	-40.1001	-119.019	-40.0696	-104.37	-40.1001	-95.8252	-40.1001	-104.98	-40.1001	-123.291	-40.1001	-106.201	-40.1001	-133.057	-40.0696	-164.795	-40.1001	-136.108	-40.1001	-160.522	-40.1001
0.06	-69.5801	-40.1001	-68.3594	-40.1001	-81.7871	-40.0696	-115.356	-40.0696	-101.318	-40.1001	-76.9043	-40.1001	-101.929	-40.1001	-110.474	-40.1306	-97.6563	-40.1001	-114.746	-40.1001	-105.591	-40.1001	-98.2666	-40.1001	-108.643	-40.1001	-131.226	-40.0696	-104.98	-40.0696	-122.681	-40.0696	-140.381	-40.1001	-118.408	-40.1001	-156.25	-40.1001
0.0605	-79.3457	-40.1001	-72.0215	-40.1001	-84.8389	-40.0696	-106.201	-40.1001	-86.6699	-40.1306	-87.2803	-40.1001	-93.9941	-40.1306	-118.408	-40.1306	-91.5527	-40.0696	-107.422	-40.1001	-100.708	-40.1001	-96.4355	-40.1001	-115.356	-40.1001	-121.46	-40.1001	-105.591	-40.0696	-126.953	-40.1001	-144.653	-40.1001	-123.291	-40.1306	-148.926	-40.1001
0.061	-76.2939	-40.1611	-71.4111	-40.1306	-84.8389	-40.0696	-120.239	-40.1001	-100.708	-40.1306	-99.4873	-40.0696	-101.318	-40.1001	-116.577	-40.1001	-89.7217	-40.0696	-123.901	-40.0696	-109.863	-40.1001	-106.812	-40.0696	-121.46	-40.1306	-111.694	-40.1001	-111.084	-40.1306	-125.732	-40.0696	-158.081	-40.1001	-117.798	-40.1001	-143.433	-40.1001
0.0615	-83.0078	-40.1001	-74.4629	-40.0696	-75.0732	-40.0696	-112.305	-40.1001	-109.863	-40.1001	-90.332	-40.1001	-114.746	-40.1306	-130.005	-40.1306	-91.5527	-40.1001	-113.525	-40.1001	-113.525	-40.1001	-114.746	-40.1306	-106.201	-40.1001	-133.667	-40.1001	-116.577	-40.1306	-123.901	-40.0696	-150.146	-40.1001	-131.836	-40.1001	-156.25	-40.1001
0.062	-80.5664	-40.1001	-67.1387	-40.1001	-77.5146	-40.1001	-119.629	-40.1001	-96.4355	-40.1306	-90.332	-40.1001	-104.37	-40.1001	-104.37	-40.1001	-86.6699	-40.1001	-106.201	-40.1306	-101.929	-40.1001	-103.76	-40.1306	-100.708	-40.1001	-138.55	-40.1001	-109.253	-40.1001	-127.563	-40.1001	-148.315	-40.1306	-120.85	-40.1001	-144.043	-40.1001
0.0625	-81.1768	-40.1306	-59.2041	-40.1001	-89.1113	-40.0696	-123.901	-40.1001	-96.4355	-40.1001	-96.4355	-40.1001	-114.136	-40.0696	-97.0459	-40.1306	-89.7217	-40.1001	-107.422	-40.0696	-117.798	-40.1306	-94.6045	-40.1001	-107.422	-40.0696	-128.784	-40.1001	-115.967	-40.1001	-133.667	-40.1306	-141.602	-40.1001	-119.019	-40.1001	-139.771	-40.0696
0.063	-74.4629	-40.1001	-77.5146	-40.1001	-92.7734	-40.0696	-125.122	-40.0696	-97.6563	-40.0696	-95.2148	-40.1001	-110.474	-40.0696	-106.201	-40.1001	-84.2285	-40.1001	-128.174	-40.1001	-99.4873	-40.1001	-113.525	-40.1001	-117.188	-40.1001	-125.732	-40.1001	-136.108	-40.1001	-134.277	-40.1001	-147.095	-40.1306	-126.953	-40.0696	-146.484	-40.1001
0.0635	-79.9561	-40.1001	-78.125	-40.0696	-77.5146	-40.1306	-119.629	-40.0696	-92.7734	-40.1306	-77.5146	-40.1001	-117.798	-40.1306	-111.084	-40.0696	-91.5527	-40.1306	-126.343	-40.1001	-114.136	-40.0696	-97.0459	-40.1001	-116.577	-40.1001	-123.901	-40.1306	-104.98	-40.1001	-119.629	-40.1001	-144.653	-40.1001	-122.07	-40.0696	-137.329	-40.0696
0.064	-75.0732	-40.1306	-69.5801	-40.1001	-75.6836	-40.1001	-102.539	-40.1001	-95.2148	-40.1306	-97.6563	-40.0696	-119.019	-40.1001	-112.915	-40.1306	-88.501	-40.1306	-114.136	-40.1001	-106.812	-40.1001	-107.422	-40.0696	-122.07	-40.1306	-118.408	-40.1001	-109.253	-40.1001	-129.395	-40.1306	-161.743	-40.1001	-117.798	-40.1306	-139.16	-40.0696
0.0645	-85.4492	-40.1306	-59.8145	-40.0696	-75.6836	-40.1001	-94.6045	-40.1001	-91.5527	-40.1001	-98.2666	-40.1001	-111.694	-40.1001	-108.032	-40.1306	-75.0732	-40.1306	-119.629	-40.1001	-102.539	-40.1001	-96.4355	-40.1306	-131.836	-40.1001	-113.525	-40.1001	-101.929	-40.1001	-125.732	-40.1001	-148.315	-40.1306	-123.901	-40.1001	-147.705	-40.0696
0.065	-93.9941	-40.1001	-62.8662	-40.1001	-80.5664	-40.1001	-90.332	-40.0696	-88.501	-40.1306	-87.2803	-40.1001	-103.149	-40.1001	-112.915	-40.0696	-79.3457	-40.1306	-108.643	-40.1306	-119.629	-40.1306	-100.708	-40.1001	-109.863	-40.1001	-112.915	-40.0696	-92.7734	-40.0696	-110.474	-40.1001	-149.536	-40.1001	-120.85	-40.1001	-145.264	-40.1001
0.0655	-81.1768	-40.1001	-77.5146	-40.1001	-74.4629	-40.1306	-104.37	-40.1306	-87.8906	-40.1001	-93.3838	-40.0696	-98.2666	-40.1001	-117.188	-40.1001	-95.2148	-40.0696	-114.136	-40.1001	-106.201	-40.1001	-105.591	-40.0696	-107.422	-40.1001	-126.343	-40.1001	-93.9941	-40.1001	-140.381	-40.0696	-145.264	-40.1001	-133.057	-40.1001	-139.771	-40.1001
0.066	-85.4492	-40.1611	-68.9697	-40.1001	-70.8008	-40.1001	-110.474	-40.1001	-95.8252	-40.1001	-89.7217	-40.1001	-111.694	-40.0696	-123.291	-40.1001	-79.9561	-40.1001	-115.356	-40.1001	-103.149	-40.1001	-115.967	-40.1306	-110.474	-40.1001	-127.563	-40.0696	-95.2148	-40.1001	-127.563	-40.1001	-159.302	-40.1001	-101.929	-40.0696	-154.419	-40.1001
0.0665	-83.0078	-40.1001	-72.6318	-40.0696	-82.3975	-40.1001	-112.915	-40.0696	-88.501	-40.1001	-97.6563	-40.1306	-105.591	-40.1001	-117.798	-40.0696	-98.877	-40.1001	-116.577	-40.1306	-105.591	-40.1001	-116.577	-40.1001	-98.877	-40.1001	-124.512	-40.1306	-114.136	-40.1001	-119.629	-40.1001	-153.198	-40.1001	-120.239	-40.1001	-148.315	-40.1306
0.067	-84.2285	-40.1001	-83.0078	-40.1001	-70.1904	-40.1001	-111.694	-40.1306	-81.7871	-40.1001	-103.149	-40.1001	-108.032	-40.1001	-106.201	-40.1001	-71.4111	-40.0696	-101.929	-40.1001	-115.356	-40.1001	-111.084	-40.1001	-108.032	-40.1306	-115.967	-40.1001	-108.032	-40.1001	-124.512	-40.0696	-152.588	-40.0696	-129.395	-40.1001	-150.757	-40.1001
0.0675	-92.1631	-40.1306	-55.542	-40.1001	-81.1768	-40.0696	-111.694	-40.1001	-89.7217	-40.1001	-103.149	-40.0696	-113.525	-40.1306	-132.446	-40.1001	-69.5801	-40.0696	-107.422	-40.1001	-103.76	-40.1001	-112.305	-40.1001	-109.253	-40.1001	-113.525	-40.0696	-106.201	-40.1306	-135.498	-40.1001	-139.16	-40.1001	-123.291	-40.1001	-145.264	-40.1001
0.068	-87.2803	-40.1001	-64.6973	-40.1001	-87.8906	-40.0696	-112.915	-40.0696	-84.8389	-40.1001	-104.98	-40.0696	-115.967	-40.1001	-114.746	-40.1001	-78.7354	-40.1001	-111.084	-40.1306	-106.812	-40.1001	-93.9941	-40.0696	-123.901	-40.0696	-126.343	-40.1001	-100.708	-40.1001	-120.85	-40.1001	-135.498	-40.1001	-111.694	-40.1001	-153.198	-40.1001
0.0685	-89.7217	-40.1001	-69.5801	-40.1306	-78.125	-40.1001	-122.07	-40.1001	-82.3975	-40.1306	-119.629	-40.1001	-122.07	-40.1001	-113.525	-40.1306	-81.1768	-40.0696	-97.6563	-40.1001	-100.708	-40.0696	-83.0078	-40.0696	-112.305	-40.1001	-106.812	-40.1001	-108.032	-40.0696	-128.174	-40.0696	-125.732	-40.1001	-117.188	-40.1001	-151.367	-40.1001
0.069	-89.1113	-40.0696	-84.2285	-40.1001	-81.1768	-40.1001	-114.746	-40.1611	-82.3975	-40.1001	-99.4873	-40.0696	-92.1631	-40.1001	-115.356	-40.1001	-79.9561	-40.1001	-114.746	-40.1306	-92.1631	-40.1001	-92.1631	-40.1001	-106.201	-40.1001	-102.539	-40.0696	-103.76	-40.1611	-115.356	-40.1306	-136.108	-40.1306	-111.694	-40.1306	-145.874	-40.1306
0.0695	-88.501	-40.1001	-71.4111	-40.0696	-73.8525	-40.1001	-120.85	-40.0696	-79.3457	-40.1001	-86.0596	-40.0696	-112.915	-40.1001	-101.929	-40.1001	-82.3975	-40.0696	-101.318	-40.1001	-97.0459	-40.1001	-102.539	-40.1001	-106.201	-40.0696	-108.032	-40.0696	-115.356	-40.1306	-119.019	-40.0696	-151.978	-40.1001	-123.291	-40.1001	-146.484	-40.1001
0.07	-85.4492	-40.1306	-71.4111	-40.1001	-59.8145	-40.1001	-134.888	-40.1001	-104.37	-40.1001	-100.708	-40.1001	-104.98	-40.0696	-109.253	-40.0696	-76.9043	-40.1001	-106.812	-40.1306	-98.877	-40.1001	-93.3838	-40.1001	-100.098	-40.1001	-109.253	-40.1001	-101.929	-40.1001	-126.953	-40.1001	-162.964	-40.0696	-121.46	-40.1001	-143.433	-40.1001
0.0705	-84.2285	-40.1001	-72.6318	-40.0696	-66.5283	-40.1001	-107.422	-40.1001	-74.4629	-40.1001	-87.2803	-40.1001	-117.188	-40.1001	-100.098	-40.1001	-79.3457	-40.1001	-106.812	-40.0696	-83.0078	-40.1001	-111.694	-40.1001	-113.525	-40.1001	-111.084	-40.1001	-106.812	-40.1306	-122.07	-40.1306	-145.874	-40.1001	-135.498	-40.1001	-146.484	-40.1001
0.071	-89.1113	-40.1001	-81.1768	-40.0696	-52.4902	-40.1001	-98.2666	-40.1001	-104.37	-40.0696	-86.6699	-40.0696	-105.591	-40.1001	-120.239	-40.1306	-72.0215	-40.1001	-94.6045	-40.1001	-82.3975	-40.1306	-122.681	-40.0696	-108.032	-40.0696	-114.136	-40.1001	-114.136	-40.1001	-136.108	-40.1001	-127.563	-40.1001	-142.822	-40.1001	-147.095	-40.0696
0.0715	-94.6045	-40.1001	-89.1113	-40.1001	-64.0869	-40.1001	-114.136	-40.1001	-86.0596	-40.1001	-87.8906	-40.1001	-111.084	-40.1001	-109.863	-40.1306	-83.0078	-40.1001	-102.539	-40.0696	-94.6045	-40.0696	-97.0459	-40.0696	-117.188	-40.0696	-108.032	-40.1001	-106.812	-40.1001	-137.939	-40.1001	-147.705	-40.1001	-126.953	-40.0696	-147.095	-40.1001
0.072	-81.7871	-40.1001	-84.2285	-40.0696	-72.0215	-40.0696	-108.032	-40.1001	-76.2939	-40.1001	-89.1113	-40.0696	-115.967	-40.0696	-130.005	-40.1306	-86.6699	-40.1001	-99.4873	-40.1306	-96.4355	-40.1001	-97.6563	-40.1001	-101.929	-40.1306	-115.967	-40.1001	-107.422	-40.1001	-117.798	-40.1001	-143.433	-40.1001	-135.498	-40.1001	-147.095	-40.1001
0.0725	-78.125	-40.1001	-80.5664	-40.1001	-59.8145	-40.0696	-112.305	-40.0696	-68.3594	-40.0696	-90.332	-40.1001	-117.188	-40.1001	-103.149	-40.1306	-77.5146	-40.0696	-122.07	-40.1001	-103.76	-40.0696	-113.525	-40.1306	-112.305	-40.1001	-126.343	-40.1001	-105.591	-40.1001	-129.395	-40.1001	-136.719	-40.1001	-122.681	-40.1001	-145.874	-40.1001
0.073	-87.8906	-40.1001	-79.9561	-40.1001	-65.3076	-40.0696	-119.629	-40.1001	-82.3975	-40.1001	-95.2148	-40.1001	-98.2666	-40.0696	-111.084	-40.1306	-92.7734	-40.1001	-121.46	-40.1001	-94.6045	-40.1001	-96.4355	-40.1001	-98.2666	-40.1001	-120.239	-40.1001	-109.253	-40.0696	-130.615	-40.0696	-140.381	-40.1001	-139.771	-40.1001	-152.588	-40.1001
0.0735	-88.501	-40.1001	-89.1113	-40.1306	-62.2559	-40.1001	-120.85	-40.1306	-79.9561	-40.1001	-79.3457	-40.0696	-103.149	-40.1001	-105.591	-40.1001	-75.0732	-40.1001	-114.136	-40.1001	-94.6045	-40.1001	-104.98	-40.0696	-118.408	-40.1001	-123.901	-40.0696	-117.798	-40.1001	-122.681	-40.0696	-156.86	-40.1306	-136.108	-40.1306	-155.64	-40.0696
0.074	-87.2803	-40.1001	-86.6699	-40.1001	-63.4766	-40.1306	-122.681	-40.1306	-64.0869	-40.1001	-94.6045	-40.1306	-115.967	-40.1001	-122.681	-40.1001	-79.3457	-40.1001	-120.239	-40.1001	-100.708	-40.1001	-104.37	-40.1306	-113.525	-40.1001	-126.343	-40.1001	-108.032	-40.1306	-115.967	-40.1001	-157.471	-40.1001	-132.446	-40.1001	-154.419	-40.1001
0.0745	-76.9043	-40.1001	-76.9043	-40.1001	-62.8662	-40.1001	-119.629	-40.1001	-87.2803	-40.1001	-92.1631	-40.1306	-93.3838	-40.1001	-116.577	-40.1001	-98.2666	-40.0696	-134.277	-40.1306	-93.9941	-40.1001	-86.0596	-40.1001	-106.201	-40.0696	-120.239	-40.1306	-93.9941	-40.1001	-133.667	-40.1001	-151.978	-40.1001	-120.239	-40.1001	-167.236	-40.1306
0.075	-79.9561	-40.1001	-73.8525	-40.1001	-73.8525	-40.1001	-121.46	-40.1306	-68.9697	-40.1001	-86.0596	-40.1001	-102.539	-40.1001	-99.4873	-40.1001	-90.9424	-40.1001	-122.07	-40.1001	-83.0078	-40.1001	-93.9941	-40.1306	-115.356	-40.1306	-149.536	-40.1001	-97.6563	-40.1001	-129.395	-40.1001	-153.809	-40.1001	-134.888	-40.1001	-158.081	-40.1306
0.0755	-87.8906	-40.1001	-82.3975	-40.0696	-68.9697	-40.1001	-114.746	-40.1001	-75.0732	-40.1001	-80.5664	-40.1001	-117.188	-40.1001	-103.149	-40.0696	-95.2148	-40.1001	-111.084	-40.1001	-83.0078	-40.1001	-92.7734	-40.1001	-104.98	-40.0696	-119.019	-40.1001	-93.3838	-40.1306	-132.446	-40.1001	-147.705	-40.1001	-138.55	-40.0696	-150.146	-40.1001
0.076	-82.3975	-40.1001	-83.0078	-40.1001	-79.9561	-40.1001	-124.512	-40.1001	-82.3975	-40.1306	-95.8252	-40.1001	-110.474	-40.0696	-104.37	-40.1001	-95.8252	-40.1001	-122.681	-40.1001	-92.7734	-40.0696	-91.5527	-40.1001	-104.98	-40.1001	-130.615	-40.1001	-108.032	-40.1001	-128.784	-40.1001	-130.615	-40.1306	-145.264	-40.1001	-136.108	-40.1306
0.0765	-75.0732	-40.1001	-88.501	-40.1306	-73.2422	-40.0696	-119.019	-40.1001	-78.7354	-40.1001	-87.8906	-40.1001	-104.37	-40.0696	-118.408	-40.1001	-80.5664	-40.1001	-132.446	-40.1001	-108.032	-40.1001	-99.4873	-40.1001	-109.863	-40.1306	-117.188	-40.0696	-95.8252	-40.1001	-131.836	-40.1001	-143.433	-40.1001	-127.563	-40.0696	-144.653	-40.1306
0.077	-70.8008	-40.1001	-75.6836	-40.1001	-56.7627	-40.1306	-111.694	-40.1306	-87.2803	-40.1001	-99.4873	-40.0696	-94.6045	-40.0696	-118.408	-40.1001	-89.7217	-40.1306	-116.577	-40.0696	-126.953	-40.1001	-78.7354	-40.1001	-104.37	-40.1001	-134.277	-40.1001	-90.9424	-40.1001	-131.836	-40.0696	-144.653	-40.1001	-128.784	-40.1001	-158.081	-40.1001
0.0775	-77.5146	-40.1001	-57.373	-40.1306	-70.8008	-40.1001	-104.98	-40.1001	-75.6836	-40.1306	-73.2422	-40.1001	-99.4873	-40.1001	-103.76	-40.0696	-89.1113	-40.0696	-108.643	-40.0696	-106.812	-40.1001	-97.0459	-40.1001	-111.084	-40.1001	-133.057	-40.1001	-103.76	-40.0696	-129.395	-40.1306	-136.108	-40.0696	-114.746	-40.1306	-134.277	-40.1001
0.078	-79.9561	-40.1306	-93.9941	-40.1306	-61.6455	-40.1001	-108.643	-40.1306	-85.4492	-40.1001	-90.332	-40.1001	-96.4355	-40.0696	-92.1631	-40.1001	-97.6563	-40.1001	-99.4873	-40.1001	-106.812	-40.1306	-85.4492	-40.1001	-102.539	-40.1001	-124.512	-40.1001	-106.201	-40.1001	-126.343	-40.1306	-155.029	-40.1001	-119.629	-40.1001	-153.198	-40.1001
0.0785	-78.7354	-40.1306	-69.5801	-40.1001	-71.4111	-40.1306	-122.681	-40.0696	-71.4111	-40.1001	-102.539	-40.1001	-82.3975	-40.1001	-87.2803	-40.1306	-90.9424	-40.1001	-114.746	-40.0696	-107.422	-40.1001	-110.474	-40.1001	-88.501	-40.1001	-111.694	-40.1001	-103.76	-40.1001	-114.746	-40.1306	-151.978	-40.1001	-144.043	-40.0696	-147.705	-40.1306
0.079	-81.7871	-40.1001	-65.3076	-40.1001	-85.4492	-40.1001	-122.07	-40.1306	-90.332	-40.0696	-98.2666	-40.1306	-89.7217	-40.1001	-88.501	-40.0696	-101.318	-40.1001	-114.746	-40.1306	-110.474	-40.1001	-111.694	-40.1001	-102.539	-40.1001	-143.433	-40.1001	-96.4355	-40.1001	-123.291	-40.1306	-154.419	-40.1001	-126.953	-40.1001	-135.498	-40.1001
0.0795	-78.125	-40.1001	-70.8008	-40.1306	-73.8525	-40.1001	-130.615	-40.1001	-76.2939	-40.1001	-88.501	-40.1001	-94.6045	-40.0696	-78.7354	-40.0696	-86.0596	-40.1306	-112.915	-40.1306	-95.2148	-40.1001	-126.953	-40.1001	-101.318	-40.1001	-135.498	-40.1001	-92.1631	-40.1001	-122.681	-40.1001	-164.185	-40.0696	-126.953	-40.1001	-126.953	-40.1306
0.08	-68.9697	-40.1001	-71.4111	-40.1001	-84.8389	-40.1001	-119.629	-40.1001	-83.0078	-40.1001	-85.4492	-40.1306	-104.37	-40.1001	-92.1631	-40.1001	-79.3457	-40.1306	-114.746	-40.0696	-101.929	-40.1001	-100.098	-40.1001	-101.318	-40.1001	-117.798	-40.1001	-104.37	-40.1001	-125.122	-40.1001	-120.239	-40.0696	-139.771	-40.0696	-140.991	-40.1001
0.0805	-83.6182	-40.1001	-70.8008	-40.1001	-64.0869	-40.1306	-103.76	-40.1306	-93.9941	-40.1306	-97.6563	-40.1001	-76.2939	-40.0696	-93.9941	-40.1001	-81.1768	-40.1001	-103.149	-40.1001	-120.85	-40.1001	-106.812	-40.0696	-94.6045	-40.1001	-122.07	-40.1001	-98.2666	-40.1306	-119.019	-40.0696	-151.367	-40.1001	-137.939	-40.1001	-140.991	-40.1001
0.081	-68.9697	-40.1306	-79.3457	-40.1306	-68.9697	-40.1001	-108.032	-40.1001	-87.2803	-40.1306	-89.1113	-40.1001	-101.318	-40.1001	-104.98	-40.1001	-86.0596	-40.1001	-120.239	-40.1001	-108.643	-40.1001	-94.6045	-40.0696	-97.0459	-40.1001	-108.643	-40.1001	-81.7871	-40.1306	-124.512	-40.0696	-152.588	-40.1001	-134.888	-40.1306	-158.081	-40.1306
0.0815	-73.8525	-40.1306	-87.2803	-40.1001	-69.5801	-40.1306	-131.226	-40.1001	-89.7217	-40.1306	-95.2148	-40.1001	-96.4355	-40.1001	-87.2803	-40.1001	-89.7217	-40.1001	-110.474	-40.0696	-106.812	-40.1001	-95.2148	-40.1306	-103.149	-40.1001	-109.253	-40.1001	-103.149	-40.1306	-109.253	-40.1001	-151.978	-40.1001	-130.615	-40.1001	-140.381	-40.1001
0.082	-72.6318	-40.1001	-78.125	-40.0696	-70.1904	-40.1001	-129.395	-40.1001	-108.643	-40.1001	-96.4355	-40.1001	-88.501	-40.0696	-91.5527	-40.0696	-87.2803	-40.0696	-123.291	-40.0696	-118.408	-40.1001	-115.356	-40.1001	-91.5527	-40.1001	-117.798	-40.1001	-93.9941	-40.0696	-120.239	-40.0696	-147.095	-40.1001	-133.667	-40.1001	-122.07	-40.1001
0.0825	-73.8525	-40.1001	-74.4629	-40.1306	-83.0078	-40.1001	-134.888	-40.0696	-101.929	-40.1001	-109.253	-40.1001	-96.4355	-40.0696	-86.6699	-40.1001	-92.1631	-40.1001	-115.967	-40.0696	-110.474	-40.1306	-98.877	-40.1001	-97.0459	-40.1001	-106.201	-40.1001	-109.253	-40.0696	-121.46	-40.1001	-139.771	-40.1001	-120.85	-40.1306	-134.277	-40.1001
0.083	-59.8145	-40.1001	-63.4766	-40.1306	-66.5283	-40.1001	-134.277	-40.0696	-104.98	-40.1306	-100.098	-40.1001	-78.125	-40.1001	-89.1113	-40.1306	-62.2559	-40.1001	-100.708	-40.1001	-91.5527	-40.1001	-100.708	-40.0696	-106.812	-40.1001	-123.291	-40.1001	-115.967	-40.1306	-130.005	-40.1001	-146.484	-40.1001	-124.512	-40.0696	-135.498	-40.1001
0.0835	-80.5664	-40.1001	-78.125	-40.1001	-76.9043	-40.0696	-135.498	-40.1001	-96.4355	-40.1001	-103.76	-40.1001	-97.0459	-40.1001	-81.1768	-40.1001	-83.0078	-40.1001	-109.253	-40.1001	-106.812	-40.0696	-95.8252	-40.1001	-84.2285	-40.1001	-112.915	-40.1001	-81.1768	-40.1001	-117.798	-40.1001	-153.198	-40.1001	-136.719	-40.1001	-145.264	-40.1306
0.084	-81.1768	-40.1001	-72.0215	-40.1306	-82.3975	-40.1001	-126.343	-40.1001	-97.6563	-40.1306	-90.9424	-40.0696	-94.6045	-40.1001	-91.5527	-40.1001	-94.6045	-40.0696	-110.474	-40.1001	-100.098	-40.1306	-94.6045	-40.0696	-93.9941	-40.1001	-113.525	-40.1001	-82.3975	-40.1001	-134.888	-40.1001	-158.691	-40.1001	-119.629	-40.1306	-153.809	-40.1001
0.0845	-77.5146	-40.1306	-70.8008	-40.1001	-75.6836	-40.1001	-120.239	-40.1001	-95.8252	-40.1306	-89.1113	-40.1001	-89.7217	-40.0696	-81.7871	-40.1001	-95.2148	-40.1001	-100.708	-40.1001	-104.37	-40.1001	-109.253	-40.0696	-94.6045	-40.1306	-117.798	-40.1001	-87.8906	-40.1001	-129.395	-40.1001	-143.433	-40.0696	-119.019	-40.1001	-137.939	-40.1001
0.085	-75.6836	-40.1306	-76.2939	-40.1001	-76.2939	-40.0696	-115.356	-40.1001	-93.3838	-40.1001	-95.2148	-40.1001	-89.7217	-40.1306	-86.0596	-40.0696	-88.501	-40.1001	-100.098	-40.1001	-117.188	-40.0696	-114.136	-40.1001	-111.084	-40.1001	-120.239	-40.1001	-103.149	-40.1306	-124.512	-40.1001	-153.198	-40.1001	-117.188	-40.1001	-155.029	-40.1001
0.0855	-78.125	-40.1001	-75.6836	-40.1001	-93.3838	-40.0696	-109.253	-40.1001	-97.6563	-40.0696	-98.877	-40.1001	-95.2148	-40.1001	-106.201	-40.1001	-86.0596	-40.1001	-115.967	-40.1001	-104.98	-40.1306	-126.343	-40.1001	-94.6045	-40.1001	-129.395	-40.1001	-79.9561	-40.1001	-115.356	-40.0696	-146.484	-40.1306	-114.746	-40.1001	-125.732	-40.1001
0.086	-75.6836	-40.1001	-59.8145	-40.1001	-76.9043	-40.1306	-112.915	-40.1001	-103.149	-40.1001	-89.7217	-40.0696	-93.9941	-40.1001	-86.6699	-40.1001	-84.2285	-40.0696	-108.032	-40.0696	-124.512	-40.1306	-124.512	-40.1001	-108.032	-40.1001	-128.174	-40.1001	-95.8252	-40.0696	-119.629	-40.1001	-159.302	-40.0696	-108.643	-40.1306	-142.822	-40.1001
0.0865	-73.8525	-40.1001	-66.5283	-40.0696	-78.7354	-40.1306	-112.305	-40.0696	-86.0596	-40.1001	-98.877	-40.1001	-109.863	-40.0696	-84.2285	-40.1001	-90.332	-40.1001	-102.539	-40.1001	-112.305	-40.1001	-118.408	-40.1001	-112.915	-40.0696	-123.291	-40.1001	-130.615	-40.1001	-116.577	-40.1306	-139.16	-40.1001	-120.85	-40.1001	-155.029	-40.1001
0.087	-68.9697	-40.1001	-76.2939	-40.1611	-78.125	-40.1001	-112.305	-40.1001	-87.2803	-40.1001	-98.877	-40.1001	-100.098	-40.0696	-82.3975	-40.1306	-73.2422	-40.1001	-123.291	-40.1001	-106.201	-40.1306	-114.746	-40.0696	-120.85	-40.0696	-131.226	-40.1001	-101.318	-40.1001	-100.708	-40.0696	-151.978	-40.1306	-116.577	-40.1001	-152.588	-40.1001
0.0875	-70.8008	-40.1306	-73.8525	-40.1306	-74.4629	-40.1001	-104.37	-40.1001	-97.6563	-40.1001	-98.877	-40.1306	-102.539	-40.1001	-91.5527	-40.1001	-78.125	-40.1001	-104.98	-40.1001	-116.577	-40.1001	-106.812	-40.0391	-109.863	-40.1001	-123.291	-40.1001	-103.149	-40.1001	-108.032	-40.1001	-141.602	-40.1001	-111.084	-40.1001	-157.471	-40.1001
0.088	-84.2285	-40.1001	-76.9043	-40.1001	-72.0215	-40.1001	-111.084	-40.1001	-97.0459	-40.1306	-99.4873	-40.1001	-89.7217	-40.1001	-95.8252	-40.1306	-80.5664	-40.1001	-122.681	-40.1001	-122.07	-40.1001	-95.2148	-40.1001	-115.356	-40.0696	-122.681	-40.1001	-89.7217	-40.1001	-128.784	-40.1001	-136.719	-40.1001	-122.681	-40.1001	-151.367	-40.1001
0.0885	-76.2939	-40.1001	-87.8906	-40.1001	-60.4248	-40.1001	-108.643	-40.1001	-87.2803	-40.1001	-95.2148	-40.0696	-96.4355	-40.1306	-88.501	-40.1001	-72.0215	-40.1001	-105.591	-40.1001	-98.2666	-40.1001	-93.3838	-40.1001	-109.863	-40.1001	-133.057	-40.0696	-98.877	-40.1001	-137.329	-40.1001	-128.784	-40.1001	-114.746	-40.1001	-139.771	-40.1001
0.089	-79.9561	-40.1001	-73.2422	-40.1306	-65.3076	-40.1001	-115.356	-40.1306	-114.746	-40.1001	-87.2803	-40.1306	-97.0459	-40.1001	-89.7217	-40.1001	-79.3457	-40.1001	-110.474	-40.1306	-103.149	-40.1001	-100.708	-40.1001	-124.512	-40.1001	-119.629	-40.1001	-110.474	-40.1306	-122.681	-40.1001	-132.446	-40.0696	-112.915	-40.1001	-153.809	-40.0696
0.0895	-78.125	-40.1001	-84.2285	-40.1001	-62.2559	-40.1001	-108.643	-40.1001	-103.76	-40.1001	-86.6699	-40.1001	-108.643	-40.0696	-106.201	-40.1306	-91.5527	-40.1001	-105.591	-40.1001	-110.474	-40.1001	-111.084	-40.1001	-115.356	-40.1001	-120.85	-40.0696	-110.474	-40.1306	-122.07	-40.1001	-153.198	-40.0696	-104.98	-40.1001	-144.043	-40.0696
0.09	-75.0732	-40.1001	-90.9424	-40.1001	-67.1387	-40.1001	-86.6699	-40.0696	-109.253	-40.1001	-78.7354	-40.1001	-90.332	-40.0696	-105.591	-40.0696	-89.1113	-40.0696	-117.188	-40.1001	-108.032	-40.0696	-101.929	-40.1306	-100.708	-40.1001	-120.239	-40.1306	-111.694	-40.1306	-120.85	-40.1001	-153.809	-40.1001	-135.498	-40.1001	-126.343	-40.1306
0.0905	-66.5283	-40.1306	-85.4492	-40.1001	-81.1768	-40.1001	-96.4355	-40.1001	-97.6563	-40.1001	-109.863	-40.1001	-113.525	-40.1001	-106.812	-40.1001	-86.6699	-40.0696	-112.305	-40.1001	-96.4355	-40.1306	-101.929	-40.1001	-111.084	-40.0696	-127.563	-40.1001	-122.07	-40.1001	-128.174	-40.0696	-141.602	-40.1306	-119.019	-40.1001	-137.329	-40.1001
0.091	-73.2422	-40.1306	-75.6836	-40.0696	-86.0596	-40.1306	-88.501	-40.0696	-75.0732	-40.1001	-98.2666	-40.0696	-99.4873	-40.1306	-98.2666	-40.1001	-89.7217	-40.1001	-110.474	-40.1001	-104.98	-40.1001	-99.4873	-40.1306	-110.474	-40.1001	-123.291	-40.1001	-107.422	-40.1001	-117.798	-40.1001	-145.264	-40.1001	-127.563	-40.0696	-128.784	-40.1001
0.0915	-72.6318	-40.1001	-79.9561	-40.1001	-84.2285	-40.1001	-93.3838	-40.0696	-84.2285	-40.1001	-86.6699	-40.1001	-101.929	-40.1001	-119.629	-40.1001	-107.422	-40.1306	-136.719	-40.1001	-97.0459	-40.0696	-105.591	-40.0696	-117.798	-40.1001	-114.746	-40.1001	-110.474	-40.1001	-122.07	-40.0696	-154.419	-40.1611	-121.46	-40.1001	-152.588	-40.0696
0.092	-84.2285	-40.1306	-82.3975	-40.1001	-72.6318	-40.1001	-98.2666	-40.0696	-93.9941	-40.1001	-74.4629	-40.1001	-90.9424	-40.0696	-141.602	-40.1001	-99.4873	-40.1306	-112.305	-40.1001	-114.136	-40.1001	-100.708	-40.0696	-100.708	-40.1306	-115.967	-40.1306	-100.708	-40.1001	-124.512	-40.1001	-145.264	-40.1001	-115.967	-40.0696	-161.743	-40.1001
0.0925	-78.125	-40.1001	-87.8906	-40.1306	-68.9697	-40.1306	-97.6563	-40.1001	-100.098	-40.1001	-77.5146	-40.1001	-95.2148	-40.1001	-131.226	-40.1001	-83.6182	-40.1306	-119.629	-40.1001	-97.0459	-40.0696	-97.0459	-40.1001	-109.253	-40.1001	-97.0459	-40.1001	-109.863	-40.1306	-112.305	-40.1001	-149.536	-40.0696	-122.07	-40.1001	-166.626	-40.1001
0.093	-73.2422	-40.1001	-76.2939	-40.1306	-68.9697	-40.1001	-103.76	-40.1001	-86.0596	-40.0696	-90.332	-40.1001	-87.2803	-40.1001	-112.305	-40.1001	-80.5664	-40.1001	-106.201	-40.0696	-102.539	-40.1001	-98.877	-40.0696	-114.746	-40.1306	-119.629	-40.1001	-114.746	-40.1306	-126.343	-40.0696	-156.25	-40.1001	-128.784	-40.1001	-144.043	-40.0696
0.0935	-83.0078	-40.1001	-79.9561	-40.0696	-80.5664	-40.1001	-117.798	-40.1001	-84.2285	-40.1306	-87.8906	-40.1306	-91.5527	-40.0696	-92.1631	-40.1001	-118.408	-40.0696	-117.188	-40.1001	-111.694	-40.1001	-92.7734	-40.0696	-120.239	-40.1001	-115.356	-40.1306	-112.915	-40.1001	-130.005	-40.1001	-156.25	-40.1001	-103.149	-40.1001	-134.277	-40.1306
0.094	-73.8525	-40.1001	-67.749	-40.1001	-70.8008	-40.0696	-100.708	-40.1001	-90.9424	-40.1001	-87.8906	-40.1001	-93.3838	-40.0696	-96.4355	-40.1001	-101.929	-40.1001	-122.07	-40.1001	-100.098	-40.1001	-101.318	-40.1001	-109.253	-40.0696	-123.901	-40.1001	-103.76	-40.1306	-117.188	-40.1306	-150.757	-40.1001	-118.408	-40.1001	-153.198	-40.1001
0.0945	-78.7354	-40.1306	-70.8008	-40.1001	-82.3975	-40.1001	-78.125	-40.1001	-114.136	-40.1001	-95.8252	-40.1001	-90.9424	-40.1306	-114.136	-40.1001	-111.084	-40.1001	-124.512	-40.1001	-97.0459	-40.1001	-97.6563	-40.1306	-106.812	-40.1001	-131.836	-40.1001	-108.032	-40.1001	-119.629	-40.1001	-165.405	-40.1001	-134.277	-40.1001	-152.588	-40.1001
0.095	-56.1523	-40.0696	-84.2285	-40.1306	-74.4629	-40.0696	-87.2803	-40.1306	-106.812	-40.1001	-77.5146	-40.1306	-92.7734	-40.1001	-83.6182	-40.0696	-113.525	-40.1001	-109.253	-40.1001	-91.5527	-40.1001	-81.1768	-40.0696	-99.4873	-40.0696	-134.277	-40.1306	-112.915	-40.1001	-132.446	-40.1001	-159.912	-40.1001	-123.291	-40.1001	-154.419	-40.1001
0.0955	-66.5283	-40.1306	-76.9043	-40.1001	-84.2285	-40.1001	-103.149	-40.1001	-98.2666	-40.1001	-82.3975	-40.0696	-106.201	-40.0696	-96.4355	-40.1306	-93.9941	-40.1306	-115.356	-40.1306	-91.5527	-40.1001	-89.1113	-40.1001	-94.6045	-40.0696	-107.422	-40.1001	-94.6045	-40.1306	-122.07	-40.0696	-151.978	-40.0696	-126.343	-40.1001	-155.029	-40.1001
0.096	-70.1904	-40.1001	-79.3457	-40.1001	-90.332	-40.1001	-100.098	-40.1001	-123.901	-40.1001	-80.5664	-40.1001	-98.2666	-40.1001	-98.2666	-40.1001	-106.201	-40.1001	-115.356	-40.1001	-108.032	-40.0696	-92.7734	-40.1001	-99.4873	-40.1001	-115.356	-40.0696	-110.474	-40.0696	-132.446	-40.1001	-161.133	-40.1001	-123.291	-40.0696	-150.757	-40.1001
0.0965	-70.1904	-40.1306	-82.3975	-40.1001	-69.5801	-40.1001	-100.098	-40.0696	-114.136	-40.1306	-89.7217	-40.1001	-103.76	-40.1001	-102.539	-40.1001	-83.6182	-40.1001	-112.305	-40.1001	-120.85	-40.1001	-95.8252	-40.1001	-90.332	-40.0696	-102.539	-40.1001	-95.8252	-40.1306	-122.07	-40.1001	-159.302	-40.1306	-131.226	-40.1001	-152.588	-40.0696
0.097	-71.4111	-40.1001	-64.0869	-40.1306	-86.6699	-40.1001	-100.098	-40.1001	-132.446	-40.1001	-99.4873	-40.0696	-93.9941	-40.1001	-99.4873	-40.1306	-93.9941	-40.1001	-112.915	-40.1001	-112.305	-40.1001	-81.7871	-40.1306	-113.525	-40.1001	-115.967	-40.1001	-100.098	-40.1001	-136.719	-40.1306	-156.25	-40.1001	-140.381	-40.1001	-150.757	-40.1001
0.0975	-74.4629	-40.1001	-75.0732	-40.0696	-82.3975	-40.1001	-110.474	-40.1306	-111.084	-40.1306	-95.2148	-40.1001	-104.37	-40.1001	-89.1113	-40.1001	-77.5146	-40.0696	-103.76	-40.0696	-91.5527	-40.1001	-94.6045	-40.1001	-104.98	-40.1001	-115.356	-40.1001	-122.681	-40.1001	-127.563	-40.1001	-156.86	-40.1306	-123.291	-40.1001	-151.367	-40.1001
0.098	-68.3594	-40.1001	-86.0596	-40.1001	-73.8525	-40.1306	-92.7734	-40.1306	-130.615	-40.1306	-98.877	-40.1001	-93.9941	-40.0696	-95.2148	-40.1001	-87.8906	-40.1306	-126.343	-40.1001	-106.812	-40.1306	-82.3975	-40.1001	-95.8252	-40.0696	-133.057	-40.1001	-124.512	-40.1001	-129.395	-40.0696	-140.381	-40.1001	-127.563	-40.1001	-150.757	-40.1001
0.0985	-58.5938	-40.1001	-86.6699	-40.1001	-74.4629	-40.1001	-106.201	-40.1001	-111.084	-40.1001	-106.201	-40.1001	-87.2803	-40.1001	-106.812	-40.0696	-81.7871	-40.1001	-127.563	-40.1001	-102.539	-40.1306	-104.98	-40.1001	-99.4873	-40.1001	-143.433	-40.1001	-123.901	-40.1306	-110.474	-40.1306	-151.978	-40.1001	-129.395	-40.1001	-150.146	-40.1306
0.099	-66.5283	-40.1001	-72.6318	-40.0696	-70.1904	-40.1306	-101.318	-40.1001	-101.318	-40.0696	-100.708	-40.1306	-97.0459	-40.1306	-103.76	-40.1001	-101.929	-40.1306	-99.4873	-40.0696	-95.8252	-40.1001	-88.501	-40.0696	-100.708	-40.0696	-106.201	-40.0696	-112.915	-40.1306	-133.057	-40.1001	-157.471	-40.1001	-125.122	-40.1001	-150.757	-40.1306
0.0995	-75.0732	-40.0696	-66.5283	-40.1306	-89.1113	-40.1001	-112.915	-40.1001	-98.2666	-40.0696	-98.2666	-40.1001	-84.2285	-40.1001	-72.0215	-40.1001	-81.1768	-40.1001	-132.446	-40.1306	-118.408	-40.1001	-84.2285	-40.1001	-111.694	-40.1001	-111.694	-40.1001	-111.084	-40.1306	-128.174	-40.1001	-144.653	-40.1001	-126.953	-40.1001	-150.146	-40.1001
0.1	-73.2422	-40.1001	-81.1768	-40.1306	-85.4492	-40.0696	-112.915	-40.1306	-99.4873	-40.1001	-105.591	-40.1001	-104.37	-40.1001	-91.5527	-40.1001	-87.2803	-40.0696	-126.953	-40.1306	-108.032	-40.0696	-81.7871	-40.1001	-95.8252	-40.1001	-116.577	-40.0696	-106.201	-40.1001	-118.408	-40.0696	-152.588	-40.1306	-123.291	-40.1001	-146.484	-40.1001
0.1005	-55.542	-40.1001	-57.373	-40.1001	-74.4629	-40.0696	-118.408	-40.1001	-76.9043	-40.1001	-94.6045	-40.0696	-90.332	-40.1001	-103.76	-40.0696	-85.4492	-40.0696	-120.85	-40.1001	-109.863	-40.1306	-89.1113	-40.1001	-88.501	-40.1001	-122.07	-40.1001	-112.915	-40.0696	-122.681	-40.1001	-150.146	-40.1001	-123.291	-40.0696	-158.081	-40.1001
0.101	-55.542	-40.1001	-59.8145	-40.1306	-73.8525	-40.1001	-100.098	-40.1306	-100.708	-40.1001	-80.5664	-40.1001	-101.318	-40.0696	-101.318	-40.1001	-94.6045	-40.0696	-142.212	-40.1306	-111.694	-40.1001	-100.098	-40.0696	-101.929	-40.1001	-133.667	-40.1306	-101.929	-40.1001	-123.291	-40.0696	-157.471	-40.1001	-115.356	-40.1001	-162.354	-40.1001
0.1015	-60.4248	-40.1001	-84.8389	-40.0696	-67.1387	-40.1001	-103.149	-40.1306	-90.332	-40.1001	-98.2666	-40.1001	-114.746	-40.1001	-92.1631	-40.1001	-66.5283	-40.1001	-122.681	-40.1001	-117.798	-40.1001	-87.8906	-40.1306	-91.5527	-40.1001	-131.836	-40.1306	-101.929	-40.1001	-108.643	-40.0696	-139.771	-40.0696	-112.305	-40.0696	-151.367	-40.1001
0.102	-56.7627	-40.0696	-77.5146	-40.0696	-74.4629	-40.0696	-122.681	-40.1001	-113.525	-40.1001	-77.5146	-40.1001	-103.149	-40.1001	-92.1631	-40.1001	-76.9043	-40.0696	-132.446	-40.1001	-116.577	-40.1001	-104.37	-40.1001	-92.7734	-40.1001	-119.629	-40.1001	-100.708	-40.1001	-100.708	-40.1001	-170.898	-40.1001	-112.305	-40.1001	-162.354	-40.1001
0.1025	-72.6318	-40.1001	-60.4248	-40.1001	-78.7354	-40.1001	-123.291	-40.1001	-91.5527	-40.1306	-89.1113	-40.1001	-111.694	-40.0696	-108.032	-40.1001	-70.1904	-40.0696	-125.732	-40.1001	-108.032	-40.1001	-98.877	-40.1001	-102.539	-40.1001	-120.85	-40.1306	-108.643	-40.1001	-96.4355	-40.1001	-180.664	-40.1001	-112.915	-40.1001	-138.55	-40.1001
0.103	-54.3213	-40.1001	-60.4248	-40.1001	-77.5146	-40.1001	-112.915	-40.1001	-117.188	-40.1001	-88.501	-40.0696	-102.539	-40.1001	-100.708	-40.1001	-76.2939	-40.1001	-117.798	-40.1001	-106.812	-40.1001	-98.2666	-40.0696	-100.708	-40.0696	-128.784	-40.1001	-106.201	-40.1001	-116.577	-40.1001	-153.809	-40.1306	-111.694	-40.0696	-140.991	-40.1001
0.1035	-68.3594	-40.1001	-57.373	-40.1001	-84.2285	-40.1306	-92.1631	-40.1001	-106.812	-40.1001	-92.7734	-40.1001	-112.915	-40.1306	-94.6045	-40.1306	-81.1768	-40.1001	-135.498	-40.1001	-119.019	-40.0696	-100.098	-40.1001	-91.5527	-40.1001	-132.446	-40.1001	-107.422	-40.1306	-120.85	-40.1001	-143.433	-40.1306	-111.694	-40.1001	-146.484	-40.1001
0.104	-65.918	-40.1001	-74.4629	-40.1001	-69.5801	-40.1001	-103.76	-40.1001	-111.694	-40.1001	-84.2285	-40.1001	-109.253	-40.1001	-88.501	-40.0696	-68.3594	-40.1001	-111.084	-40.1001	-115.967	-40.1001	-98.877	-40.0696	-92.7734	-40.1001	-131.226	-40.1001	-114.136	-40.0696	-110.474	-40.1001	-145.264	-40.1001	-106.812	-40.1001	-143.433	-40.0696
0.1045	-64.6973	-40.1306	-73.8525	-40.1001	-80.5664	-40.1001	-119.629	-40.1001	-108.643	-40.0696	-89.1113	-40.0696	-102.539	-40.1001	-99.4873	-40.1001	-70.8008	-40.1001	-98.877	-40.1306	-112.305	-40.0696	-93.9941	-40.1001	-130.005	-40.1001	-134.277	-40.1001	-116.577	-40.0696	-137.939	-40.1001	-131.226	-40.1001	-115.356	-40.1306	-155.029	-40.0696
0.105	-61.6455	-40.1306	-68.9697	-40.1001	-77.5146	-40.0696	-99.4873	-40.1001	-98.877	-40.0696	-92.7734	-40.1001	-103.76	-40.1306	-94.6045	-40.1001	-76.2939	-40.1001	-111.694	-40.1001	-122.07	-40.1001	-95.2148	-40.1306	-117.188	-40.1306	-140.991	-40.0696	-106.201	-40.1001	-109.863	-40.1001	-142.822	-40.1001	-114.746	-40.1001	-154.419	-40.1001
0.1055	-64.0869	-40.1001	-76.2939	-40.1001	-83.6182	-40.1001	-96.4355	-40.1001	-109.253	-40.1306	-92.1631	-40.1306	-99.4873	-40.1306	-121.46	-40.0696	-68.9697	-40.1001	-111.694	-40.1001	-122.07	-40.0696	-106.201	-40.1306	-108.643	-40.1001	-140.381	-40.1001	-104.37	-40.1001	-115.356	-40.0696	-147.095	-40.0696	-121.46	-40.1001	-128.174	-40.1001
0.106	-58.5938	-40.1001	-75.0732	-40.1001	-100.098	-40.1001	-83.6182	-40.1001	-100.708	-40.1001	-84.2285	-40.1306	-106.201	-40.1001	-91.5527	-40.1001	-88.501	-40.1001	-101.318	-40.1001	-116.577	-40.1001	-89.1113	-40.1001	-100.098	-40.1001	-147.705	-40.1001	-120.85	-40.0696	-104.98	-40.1001	-139.771	-40.0696	-107.422	-40.1306	-139.16	-40.1001
0.1065	-67.1387	-40.1001	-69.5801	-40.0696	-79.9561	-40.1001	-87.8906	-40.1306	-108.643	-40.1001	-88.501	-40.1001	-116.577	-40.1001	-106.201	-40.1001	-73.2422	-40.1001	-105.591	-40.0696	-109.863	-40.1306	-100.098	-40.1306	-100.708	-40.1306	-131.226	-40.0696	-87.8906	-40.1001	-112.915	-40.1001	-134.888	-40.1001	-115.967	-40.0696	-148.315	-40.1306
0.107	-67.749	-40.1001	-68.3594	-40.1001	-74.4629	-40.1001	-93.3838	-40.0696	-106.201	-40.1306	-84.2285	-40.1306	-122.681	-40.1306	-110.474	-40.1306	-78.125	-40.1001	-112.915	-40.1001	-110.474	-40.1001	-93.9941	-40.0696	-100.098	-40.0696	-129.395	-40.1001	-98.2666	-40.1306	-114.136	-40.1001	-141.602	-40.1001	-105.591	-40.1001	-139.771	-40.1001
0.1075	-75.0732	-40.1001	-49.4385	-40.1306	-70.1904	-40.1001	-117.188	-40.1001	-111.084	-40.0696	-83.0078	-40.1001	-99.4873	-40.1306	-98.2666	-40.1001	-72.6318	-40.1001	-109.863	-40.1001	-119.629	-40.1001	-101.929	-40.1001	-105.591	-40.1306	-139.771	-40.1001	-120.239	-40.1001	-119.629	-40.0696	-158.081	-40.1001	-114.746	-40.0696	-126.343	-40.1001
0.108	-60.4248	-40.1306	-67.749	-40.1306	-78.7354	-40.1001	-101.929	-40.1001	-107.422	-40.0696	-92.1631	-40.1001	-111.084	-40.1306	-98.877	-40.1001	-78.125	-40.1001	-107.422	-40.1001	-107.422	-40.1001	-95.8252	-40.1306	-112.915	-40.1001	-168.457	-40.1001	-104.37	-40.1001	-125.122	-40.1001	-156.25	-40.1001	-106.201	-40.1001	-145.264	-40.0696
0.1085	-68.3594	-40.1001	-71.4111	-40.1001	-95.2148	-40.1001	-108.032	-40.1001	-100.708	-40.1001	-97.0459	-40.1001	-111.084	-40.1306	-119.629	-40.0696	-67.1387	-40.1001	-98.2666	-40.1001	-123.901	-40.1001	-83.0078	-40.1001	-105.591	-40.1001	-150.146	-40.1001	-123.291	-40.1306	-120.85	-40.0696	-134.888	-40.1001	-114.746	-40.1001	-145.264	-40.0696
0.109	-84.2285	-40.1306	-70.1904	-40.1001	-71.4111	-40.1001	-104.37	-40.1306	-106.812	-40.1001	-87.2803	-40.1306	-113.525	-40.1306	-116.577	-40.0696	-70.8008	-40.0696	-114.746	-40.1001	-102.539	-40.1001	-98.877	-40.1306	-104.98	-40.1001	-155.64	-40.1001	-136.108	-40.1306	-110.474	-40.1001	-139.771	-40.1001	-110.474	-40.1001	-145.874	-40.1001
0.1095	-73.8525	-40.1001	-83.0078	-40.1001	-74.4629	-40.1001	-97.6563	-40.1001	-97.6563	-40.1001	-82.3975	-40.1001	-104.98	-40.0696	-130.005	-40.1001	-89.7217	-40.1306	-104.98	-40.1001	-123.291	-40.1306	-96.4355	-40.1001	-112.305	-40.1001	-133.667	-40.1001	-131.836	-40.1001	-108.643	-40.1001	-148.926	-40.1001	-101.929	-40.1001	-131.836	-40.1001
0.11	-76.9043	-40.1001	-67.749	-40.1001	-81.1768	-40.1001	-92.1631	-40.1001	-95.2148	-40.1306	-64.6973	-40.1001	-111.694	-40.1001	-108.643	-40.1001	-77.5146	-40.0696	-98.877	-40.0696	-108.032	-40.1001	-101.318	-40.1001	-100.098	-40.1001	-111.694	-40.1001	-115.356	-40.1001	-124.512	-40.1001	-131.836	-40.1001	-107.422	-40.1001	-124.512	-40.1001
0.1105	-72.6318	-40.1001	-69.5801	-40.1306	-75.6836	-40.1306	-87.8906	-40.0696	-106.201	-40.1001	-89.7217	-40.1306	-100.708	-40.1001	-115.967	-40.0696	-73.2422	-40.1001	-112.915	-40.1306	-111.084	-40.1306	-106.201	-40.1001	-119.629	-40.0696	-147.705	-40.1306	-124.512	-40.1001	-120.239	-40.1306	-136.719	-40.1001	-93.9941	-40.1001	-128.174	-40.1001
0.111	-80.5664	-40.1306	-64.0869	-40.1306	-72.6318	-40.1001	-92.1631	-40.0696	-101.318	-40.1001	-75.6836	-40.1001	-109.863	-40.1001	-89.1113	-40.1306	-88.501	-40.1001	-105.591	-40.0696	-115.967	-40.1306	-100.098	-40.1001	-110.474	-40.1306	-145.264	-40.1001	-122.07	-40.1001	-126.953	-40.1001	-134.277	-40.1001	-109.863	-40.1001	-104.37	-40.1001
0.1115	-90.332	-40.1001	-65.3076	-40.0696	-83.6182	-40.1001	-89.1113	-40.0696	-84.2285	-40.1001	-76.2939	-40.1001	-103.76	-40.1001	-106.812	-40.1001	-88.501	-40.1306	-110.474	-40.1001	-116.577	-40.0391	-89.1113	-40.1001	-108.032	-40.1001	-127.563	-40.0696	-125.122	-40.1001	-119.629	-40.1001	-150.146	-40.1001	-99.4873	-40.1001	-120.85	-40.1306
0.112	-81.1768	-40.1306	-68.9697	-40.0696	-75.6836	-40.1001	-89.7217	-40.1001	-97.0459	-40.1306	-83.0078	-40.1001	-100.708	-40.1001	-104.98	-40.1001	-87.2803	-40.1001	-114.746	-40.0696	-103.149	-40.1001	-98.877	-40.1001	-113.525	-40.1306	-128.174	-40.0696	-124.512	-40.1306	-123.901	-40.0696	-146.484	-40.1001	-104.37	-40.1001	-120.239	-40.1001
0.1125	-73.8525	-40.1001	-75.6836	-40.1001	-83.6182	-40.1001	-99.4873	-40.1001	-89.1113	-40.1001	-83.6182	-40.1001	-99.4873	-40.1001	-97.0459	-40.1306	-83.6182	-40.0696	-106.201	-40.1001	-116.577	-40.1001	-92.7734	-40.1001	-109.253	-40.1001	-127.563	-40.0696	-138.55	-40.1306	-132.446	-40.1001	-142.822	-40.1001	-108.643	-40.1001	-122.681	-40.1306
0.113	-68.3594	-40.1306	-73.8525	-40.1001	-79.3457	-40.1001	-102.539	-40.1001	-98.2666	-40.1306	-90.9424	-40.1001	-97.6563	-40.1001	-106.812	-40.0696	-83.0078	-40.1001	-104.37	-40.0696	-105.591	-40.0696	-93.9941	-40.1001	-115.967	-40.1001	-134.277	-40.0696	-114.136	-40.0696	-149.536	-40.1306	-139.771	-40.1306	-114.746	-40.1001	-127.563	-40.0391
0.1135	-89.1113	-40.1001	-71.4111	-40.1001	-86.6699	-40.1306	-114.136	-40.1001	-81.7871	-40.1001	-86.0596	-40.1001	-88.501	-40.1306	-104.37	-40.1001	-85.4492	-40.0696	-114.136	-40.0696	-97.6563	-40.1001	-90.332	-40.1001	-103.149	-40.1001	-140.381	-40.1001	-118.408	-40.1001	-129.395	-40.0696	-133.057	-40.0696	-119.629	-40.1001	-126.953	-40.1001
0.114	-75.0732	-40.0696	-73.2422	-40.1001	-80.5664	-40.1306	-122.07	-40.1001	-92.7734	-40.1306	-79.9561	-40.1306	-102.539	-40.0696	-115.356	-40.1001	-83.6182	-40.0696	-114.136	-40.1001	-98.2666	-40.1001	-95.8252	-40.1001	-115.967	-40.1001	-144.043	-40.1001	-121.46	-40.1001	-126.953	-40.1001	-151.978	-40.1306	-119.019	-40.1306	-135.498	-40.1306
0.1145	-81.1768	-40.1001	-61.6455	-40.1001	-83.6182	-40.0696	-114.746	-40.1001	-98.2666	-40.1001	-83.0078	-40.0696	-103.149	-40.1306	-124.512	-40.1001	-93.3838	-40.1001	-108.032	-40.1001	-96.4355	-40.1001	-103.149	-40.1001	-93.9941	-40.1001	-128.174	-40.1001	-100.708	-40.1001	-124.512	-40.1306	-154.419	-40.1001	-112.915	-40.0696	-134.277	-40.1001
0.115	-64.0869	-40.1001	-78.125	-40.1001	-70.8008	-40.1001	-93.9941	-40.1306	-79.3457	-40.1001	-90.9424	-40.1001	-104.37	-40.1001	-99.4873	-40.1306	-84.8389	-40.1001	-119.019	-40.1306	-90.332	-40.0696	-83.0078	-40.1001	-97.0459	-40.1001	-138.55	-40.1001	-126.343	-40.1001	-125.122	-40.1001	-149.536	-40.1306	-125.732	-40.1001	-144.653	-40.0696
0.1155	-73.2422	-40.0696	-74.4629	-40.1306	-79.9561	-40.0696	-103.76	-40.1001	-73.2422	-40.1306	-98.877	-40.1001	-97.6563	-40.1001	-97.0459	-40.1306	-83.0078	-40.1001	-113.525	-40.1001	-110.474	-40.1001	-81.1768	-40.1001	-96.4355	-40.1001	-140.381	-40.1001	-117.798	-40.0696	-126.953	-40.1001	-140.991	-40.1001	-127.563	-40.0696	-141.602	-40.1001
0.116	-76.9043	-40.1001	-75.0732	-40.1306	-79.3457	-40.1306	-103.76	-40.1001	-89.1113	-40.1001	-85.4492	-40.1001	-95.8252	-40.0696	-113.525	-40.1001	-85.4492	-40.1001	-115.967	-40.1001	-104.37	-40.0696	-88.501	-40.0696	-111.694	-40.1001	-127.563	-40.1001	-108.643	-40.1001	-128.174	-40.1001	-136.108	-40.0696	-120.85	-40.0696	-139.16	-40.1001
0.1165	-92.1631	-40.1001	-78.125	-40.1306	-77.5146	-40.1001	-112.305	-40.1306	-80.5664	-40.1001	-85.4492	-40.0696	-92.1631	-40.1306	-114.746	-40.1001	-88.501	-40.1001	-123.291	-40.1001	-101.929	-40.1001	-90.332	-40.1306	-107.422	-40.1001	-126.953	-40.0696	-119.629	-40.1306	-129.395	-40.0696	-145.874	-40.1001	-122.681	-40.1306	-141.602	-40.0696
0.117	-78.7354	-40.0696	-69.5801	-40.0696	-86.0596	-40.1001	-96.4355	-40.1001	-84.2285	-40.0696	-97.0459	-40.1001	-104.98	-40.1001	-108.643	-40.1001	-85.4492	-40.1001	-128.784	-40.1001	-101.929	-40.1001	-84.8389	-40.1001	-99.4873	-40.1306	-122.07	-40.1001	-124.512	-40.0696	-125.122	-40.1306	-168.457	-40.1001	-111.084	-40.1001	-140.381	-40.1001
0.1175	-87.8906	-40.1001	-62.2559	-40.1001	-93.3838	-40.1001	-95.8252	-40.1001	-87.8906	-40.1001	-89.7217	-40.0696	-98.2666	-40.1001	-99.4873	-40.1001	-83.0078	-40.1001	-109.863	-40.1001	-97.0459	-40.1306	-101.318	-40.1306	-114.136	-40.0696	-118.408	-40.1001	-139.16	-40.0696	-117.188	-40.1306	-152.588	-40.1001	-116.577	-40.1306	-142.822	-40.1001
0.118	-80.5664	-40.1001	-72.0215	-40.0696	-87.2803	-40.1306	-103.76	-40.1001	-83.0078	-40.1001	-88.501	-40.1306	-111.084	-40.1001	-117.188	-40.1001	-83.0078	-40.1001	-104.98	-40.1001	-111.084	-40.1001	-105.591	-40.1306	-89.7217	-40.1001	-111.694	-40.0696	-128.784	-40.1306	-126.953	-40.1001	-156.86	-40.1001	-126.343	-40.1306	-131.836	-40.1001
0.1185	-78.125	-40.1001	-71.4111	-40.1001	-88.501	-40.1001	-95.2148	-40.1001	-95.2148	-40.1001	-126.343	-40.1001	-92.7734	-40.0696	-104.98	-40.1306	-86.6699	-40.1001	-109.863	-40.0696	-107.422	-40.1306	-100.098	-40.1001	-88.501	-40.1001	-123.901	-40.1001	-112.305	-40.1001	-125.122	-40.1001	-159.302	-40.1001	-114.746	-40.1001	-125.122	-40.1001
0.119	-76.9043	-40.1001	-65.3076	-40.1001	-79.9561	-40.1001	-111.694	-40.1001	-92.1631	-40.1001	-120.85	-40.1001	-102.539	-40.0696	-93.3838	-40.1306	-97.0459	-40.1306	-114.136	-40.1001	-111.084	-40.1001	-98.2666	-40.1001	-104.98	-40.1001	-117.798	-40.1306	-111.084	-40.1001	-140.991	-40.1306	-155.64	-40.0696	-115.967	-40.1001	-141.602	-40.1001
0.1195	-81.7871	-40.1306	-68.9697	-40.1001	-81.1768	-40.1306	-93.9941	-40.1001	-90.332	-40.1001	-95.2148	-40.1001	-102.539	-40.1001	-99.4873	-40.1001	-71.4111	-40.0696	-115.967	-40.1001	-112.305	-40.1001	-103.76	-40.1001	-101.318	-40.1001	-106.812	-40.1001	-104.98	-40.1001	-117.798	-40.1001	-147.095	-40.1001	-130.615	-40.0696	-135.498	-40.0696
0.12	-75.0732	-40.1001	-62.2559	-40.1611	-81.7871	-40.1001	-100.708	-40.1306	-86.0596	-40.0696	-120.85	-40.1306	-101.318	-40.1001	-103.76	-40.0696	-78.7354	-40.1001	-134.888	-40.1001	-97.6563	-40.1306	-93.9941	-40.0696	-92.7734	-40.1001	-137.939	-40.1001	-112.305	-40.0696	-116.577	-40.1001	-152.588	-40.0696	-109.863	-40.1306	-134.277	-40.1001
0.1205	-69.5801	-40.1001	-64.6973	-40.1001	-75.6836	-40.1001	-107.422	-40.0696	-97.6563	-40.1306	-104.98	-40.0696	-92.7734	-40.1306	-101.929	-40.1001	-81.7871	-40.1001	-115.356	-40.0696	-111.694	-40.1001	-103.149	-40.1001	-91.5527	-40.1001	-133.667	-40.0696	-123.901	-40.0696	-122.07	-40.0696	-150.757	-40.1001	-115.967	-40.0696	-135.498	-40.1001
0.121	-78.125	-40.1001	-63.4766	-40.0696	-70.8008	-40.1306	-109.253	-40.0696	-87.2803	-40.1001	-102.539	-40.1001	-97.0459	-40.1001	-113.525	-40.1001	-89.7217	-40.1306	-113.525	-40.1306	-104.98	-40.0696	-99.4873	-40.1001	-98.877	-40.0696	-134.888	-40.1001	-121.46	-40.1001	-120.85	-40.1001	-148.315	-40.1001	-103.76	-40.1001	-143.433	-40.1001
0.1215	-72.6318	-40.0696	-68.3594	-40.1001	-81.7871	-40.1001	-118.408	-40.1306	-81.1768	-40.1001	-100.708	-40.1001	-108.032	-40.1306	-111.084	-40.0696	-87.2803	-40.1001	-118.408	-40.1306	-114.136	-40.0696	-89.7217	-40.1611	-95.8252	-40.1001	-142.212	-40.1001	-124.512	-40.1001	-132.446	-40.0696	-142.212	-40.0696	-116.577	-40.1306	-142.212	-40.1001
0.122	-86.6699	-40.1001	-51.2695	-40.1001	-83.6182	-40.1001	-106.812	-40.1306	-85.4492	-40.1306	-99.4873	-40.1001	-89.7217	-40.0696	-106.201	-40.1001	-76.2939	-40.1001	-115.356	-40.1001	-103.149	-40.0696	-95.8252	-40.1001	-96.4355	-40.1001	-145.264	-40.1001	-119.019	-40.0696	-137.329	-40.1001	-138.55	-40.1001	-125.732	-40.1001	-136.719	-40.1001
0.1225	-75.6836	-40.1001	-68.3594	-40.0696	-56.1523	-40.1001	-105.591	-40.0696	-104.37	-40.1001	-101.318	-40.1001	-87.2803	-40.0696	-109.863	-40.1001	-77.5146	-40.1001	-112.305	-40.1001	-109.863	-40.1001	-84.8389	-40.1001	-92.7734	-40.0696	-147.705	-40.1001	-123.291	-40.1001	-120.239	-40.1001	-140.381	-40.1306	-114.746	-40.1001	-134.277	-40.1001
0.123	-69.5801	-40.1306	-59.2041	-40.1001	-60.4248	-40.1306	-105.591	-40.1001	-92.1631	-40.1001	-85.4492	-40.1001	-109.863	-40.1001	-106.201	-40.1001	-76.9043	-40.1001	-125.732	-40.1306	-105.591	-40.1001	-91.5527	-40.1001	-98.877	-40.1001	-158.691	-40.1001	-120.239	-40.1001	-111.694	-40.1001	-138.55	-40.1306	-119.629	-40.0696	-140.991	-40.1001
0.1235	-73.2422	-40.0696	-54.9316	-40.0696	-81.7871	-40.0696	-104.98	-40.0696	-89.7217	-40.1001	-102.539	-40.0696	-97.0459	-40.1001	-97.6563	-40.1001	-89.7217	-40.1001	-119.019	-40.1001	-99.4873	-40.1001	-93.9941	-40.1001	-106.201	-40.1001	-148.315	-40.1001	-135.498	-40.1001	-121.46	-40.1001	-137.329	-40.1001	-122.07	-40.1001	-128.784	-40.1001
0.124	-78.7354	-40.1001	-84.2285	-40.1001	-68.3594	-40.1306	-112.915	-40.0696	-97.0459	-40.1001	-92.1631	-40.0696	-101.318	-40.1001	-97.6563	-40.1001	-78.125	-40.1306	-99.4873	-40.1001	-98.2666	-40.0696	-93.3838	-40.0696	-111.084	-40.1001	-137.329	-40.0696	-129.395	-40.1001	-119.629	-40.1001	-134.888	-40.1001	-93.3838	-40.0696	-136.719	-40.1001
0.1245	-79.3457	-40.1001	-67.749	-40.1306	-91.5527	-40.1001	-123.291	-40.0696	-92.1631	-40.1001	-101.929	-40.1001	-107.422	-40.1306	-90.9424	-40.1306	-89.1113	-40.1306	-103.76	-40.1001	-98.2666	-40.1001	-91.5527	-40.1001	-90.9424	-40.1001	-147.705	-40.1306	-123.901	-40.0696	-123.901	-40.1001	-156.25	-40.1306	-118.408	-40.1001	-132.446	-40.0696
0.125	-75.6836	-40.1306	-70.8008	-40.1001	-81.1768	-40.1001	-103.76	-40.0696	-103.76	-40.1001	-98.877	-40.1001	-109.863	-40.1306	-107.422	-40.1001	-88.501	-40.1306	-120.85	-40.1001	-103.76	-40.1306	-82.3975	-40.1001	-95.8252	-40.1306	-124.512	-40.1001	-128.174	-40.1001	-119.019	-40.0696	-153.198	-40.1306	-117.798	-40.1306	-147.095	-40.1001
0.1255	-66.5283	-40.1001	-56.7627	-40.1306	-69.5801	-40.1001	-83.0078	-40.1001	-88.501	-40.1001	-111.084	-40.1001	-108.643	-40.1001	-117.188	-40.1001	-87.2803	-40.1001	-120.85	-40.1001	-97.6563	-40.1001	-97.0459	-40.1306	-95.8252	-40.1001	-119.019	-40.1001	-108.643	-40.1306	-114.746	-40.0391	-140.991	-40.1001	-119.629	-40.1001	-125.732	-40.1001
0.126	-74.4629	-40.0696	-59.8145	-40.0696	-83.6182	-40.1001	-101.318	-40.1306	-84.8389	-40.1001	-96.4355	-40.1306	-101.929	-40.1001	-115.967	-40.0696	-79.9561	-40.1001	-106.812	-40.0696	-94.6045	-40.1306	-97.6563	-40.1001	-98.2666	-40.1001	-131.226	-40.1306	-121.46	-40.0696	-140.381	-40.1001	-150.757	-40.1001	-115.967	-40.1001	-143.433	-40.1001
0.1265	-93.3838	-40.1306	-63.4766	-40.1306	-66.5283	-40.0696	-108.643	-40.1001	-69.5801	-40.1001	-97.0459	-40.0696	-101.318	-40.0696	-112.915	-40.1001	-68.9697	-40.1001	-111.694	-40.1001	-101.929	-40.1001	-87.8906	-40.0696	-117.798	-40.1001	-132.446	-40.1001	-114.136	-40.1001	-106.201	-40.1001	-141.602	-40.1001	-116.577	-40.1001	-137.939	-40.1001
0.127	-68.9697	-40.1001	-70.8008	-40.1001	-70.8008	-40.1001	-86.0596	-40.1001	-81.1768	-40.1001	-91.5527	-40.1306	-111.694	-40.1001	-114.746	-40.1001	-78.125	-40.1001	-115.967	-40.1001	-99.4873	-40.1306	-99.4873	-40.1001	-121.46	-40.1001	-119.019	-40.1001	-114.136	-40.1001	-117.798	-40.1306	-145.264	-40.0696	-126.953	-40.0696	-145.264	-40.1001
0.1275	-70.8008	-40.1001	-62.8662	-40.1306	-63.4766	-40.0696	-83.0078	-40.1306	-86.0596	-40.0696	-101.318	-40.1001	-120.239	-40.1306	-104.98	-40.1001	-72.6318	-40.1001	-106.812	-40.1001	-97.6563	-40.0696	-93.3838	-40.0696	-109.253	-40.1306	-122.07	-40.1001	-116.577	-40.0696	-125.732	-40.1001	-147.095	-40.1001	-119.019	-40.1001	-135.498	-40.0696
0.128	-74.4629	-40.1001	-68.9697	-40.1306	-62.8662	-40.1001	-93.9941	-40.1001	-78.7354	-40.1306	-104.37	-40.1001	-112.915	-40.1001	-100.708	-40.1001	-81.1768	-40.1001	-112.915	-40.1306	-106.812	-40.1306	-106.201	-40.1001	-111.694	-40.1001	-130.615	-40.1001	-119.019	-40.1001	-129.395	-40.0696	-137.939	-40.1001	-103.76	-40.1001	-143.433	-40.1001
0.1285	-84.2285	-40.1001	-64.6973	-40.0696	-63.4766	-40.1001	-89.1113	-40.1001	-84.8389	-40.1001	-112.915	-40.1001	-122.07	-40.1001	-113.525	-40.1001	-79.3457	-40.1306	-113.525	-40.1306	-96.4355	-40.1001	-93.9941	-40.1001	-103.149	-40.1306	-142.822	-40.0696	-112.305	-40.1001	-124.512	-40.1001	-134.277	-40.1001	-106.812	-40.1306	-150.146	-40.1001
0.129	-74.4629	-40.1001	-63.4766	-40.0696	-70.1904	-40.1306	-92.1631	-40.1001	-83.6182	-40.1001	-103.76	-40.1001	-116.577	-40.1001	-110.474	-40.1001	-75.6836	-40.0696	-113.525	-40.1001	-89.7217	-40.0696	-109.863	-40.1001	-98.877	-40.1001	-130.615	-40.0696	-119.019	-40.1001	-126.343	-40.0696	-134.888	-40.1001	-106.201	-40.1001	-140.991	-40.1001
0.1295	-75.0732	-40.1001	-61.6455	-40.1306	-71.4111	-40.1001	-79.3457	-40.1001	-73.8525	-40.1306	-104.98	-40.1001	-133.057	-40.0696	-115.356	-40.1001	-87.8906	-40.1001	-107.422	-40.1001	-89.1113	-40.1001	-109.253	-40.1001	-103.149	-40.1001	-134.277	-40.1306	-114.136	-40.1001	-116.577	-40.1001	-143.433	-40.1001	-128.784	-40.1306	-139.771	-40.1001
0.13	-68.3594	-40.1306	-66.5283	-40.0696	-84.2285	-40.1001	-97.6563	-40.1001	-81.7871	-40.1001	-104.37	-40.0696	-124.512	-40.0696	-126.343	-40.1001	-90.9424	-40.1306	-122.07	-40.0696	-93.9941	-40.1001	-107.422	-40.1306	-101.929	-40.1611	-134.277	-40.1306	-131.226	-40.1001	-127.563	-40.1306	-126.953	-40.1306	-112.305	-40.1001	-134.888	-40.1001
0.1305	-69.5801	-40.1001	-68.3594	-40.1001	-79.3457	-40.0696	-78.125	-40.1001	-71.4111	-40.1611	-97.0459	-40.1001	-111.694	-40.1001	-123.901	-40.0391	-90.332	-40.0696	-120.239	-40.1001	-104.37	-40.0696	-104.37	-40.0696	-105.591	-40.1001	-128.784	-40.1001	-122.07	-40.1306	-125.732	-40.1001	-127.563	-40.1001	-109.863	-40.0696	-138.55	-40.1306
0.131	-73.2422	-40.1306	-72.0215	-40.1001	-70.8008	-40.1001	-88.501	-40.0696	-66.5283	-40.1001	-92.1631	-40.1001	-105.591	-40.1001	-119.019	-40.1001	-95.2148	-40.1001	-98.2666	-40.1001	-96.4355	-40.1001	-106.201	-40.0696	-112.305	-40.1306	-124.512	-40.1001	-136.719	-40.1306	-123.291	-40.1001	-133.057	-40.1306	-126.343	-40.0391	-130.615	-40.0696
0.1315	-79.3457	-40.1001	-72.0215	-40.1001	-62.8662	-40.1306	-85.4492	-40.1001	-76.2939	-40.0696	-101.318	-40.0696	-90.332	-40.1001	-133.057	-40.1001	-78.7354	-40.1001	-104.98	-40.1001	-101.929	-40.0696	-105.591	-40.0696	-111.694	-40.1001	-130.615	-40.1001	-123.291	-40.1001	-122.07	-40.1306	-147.705	-40.1001	-114.136	-40.1001	-139.771	-40.1001
0.132	-79.9561	-40.1306	-81.7871	-40.1001	-71.4111	-40.1001	-89.1113	-40.1001	-76.2939	-40.1001	-109.253	-40.1001	-105.591	-40.0696	-122.681	-40.1001	-89.1113	-40.1001	-83.6182	-40.1001	-110.474	-40.1001	-87.8906	-40.0696	-107.422	-40.1001	-120.85	-40.1001	-128.174	-40.1001	-125.732	-40.0696	-137.329	-40.1001	-119.629	-40.1001	-152.588	-40.0696
0.1325	-70.1904	-40.1306	-65.918	-40.1306	-70.1904	-40.1001	-84.2285	-40.0696	-85.4492	-40.0696	-90.9424	-40.1306	-86.6699	-40.1001	-125.122	-40.1001	-82.3975	-40.1306	-107.422	-40.0696	-89.7217	-40.1306	-87.8906	-40.1001	-116.577	-40.1001	-117.798	-40.1001	-125.732	-40.1001	-139.771	-40.1001	-143.433	-40.0696	-122.681	-40.1306	-139.771	-40.1001
0.133	-83.0078	-40.1306	-91.5527	-40.0696	-64.0869	-40.1001	-100.708	-40.1001	-92.7734	-40.1001	-87.8906	-40.1001	-94.6045	-40.0696	-109.253	-40.1001	-97.6563	-40.0696	-113.525	-40.1001	-106.812	-40.1001	-80.5664	-40.1001	-96.4355	-40.1001	-122.681	-40.1001	-132.446	-40.1001	-131.226	-40.1001	-131.226	-40.1306	-122.07	-40.1001	-134.888	-40.1001
0.1335	-75.0732	-40.1001	-64.6973	-40.0696	-84.2285	-40.1001	-78.125	-40.0696	-83.0078	-40.1001	-90.332	-40.1306	-101.318	-40.1306	-115.356	-40.1001	-90.332	-40.1001	-100.098	-40.0696	-103.149	-40.1001	-98.2666	-40.0696	-103.149	-40.0696	-125.732	-40.1001	-131.226	-40.1001	-120.85	-40.1001	-134.277	-40.1306	-115.356	-40.1001	-136.719	-40.1001
0.134	-81.7871	-40.1001	-82.3975	-40.1306	-62.8662	-40.1001	-87.8906	-40.1001	-83.6182	-40.1001	-95.8252	-40.1001	-104.37	-40.1001	-114.746	-40.0696	-89.7217	-40.1001	-110.474	-40.1001	-95.8252	-40.1001	-101.929	-40.1001	-98.2666	-40.1001	-117.798	-40.1001	-140.381	-40.0696	-126.953	-40.1001	-135.498	-40.1306	-113.525	-40.1001	-141.602	-40.0696
0.1345	-70.1904	-40.1306	-66.5283	-40.0696	-72.0215	-40.0696	-108.032	-40.1306	-77.5146	-40.1306	-111.694	-40.0696	-80.5664	-40.0696	-118.408	-40.1001	-94.6045	-40.0696	-113.525	-40.1001	-101.929	-40.1306	-97.6563	-40.0696	-110.474	-40.1001	-119.629	-40.1001	-126.953	-40.0696	-135.498	-40.1001	-128.784	-40.1306	-106.201	-40.0696	-147.095	-40.1306
0.135	-74.4629	-40.0696	-72.6318	-40.1001	-71.4111	-40.1001	-114.136	-40.1001	-76.9043	-40.1306	-90.332	-40.1001	-91.5527	-40.1306	-109.863	-40.1001	-80.5664	-40.0696	-111.084	-40.1001	-99.4873	-40.0696	-91.5527	-40.1001	-97.6563	-40.1001	-109.863	-40.1001	-120.85	-40.1001	-120.85	-40.1001	-135.498	-40.1001	-107.422	-40.1001	-146.484	-40.1001
0.1355	-79.3457	-40.1306	-65.3076	-40.1001	-82.3975	-40.0696	-88.501	-40.1001	-84.8389	-40.1306	-101.318	-40.1001	-98.877	-40.1306	-119.629	-40.1001	-77.5146	-40.1001	-99.4873	-40.1001	-100.708	-40.1001	-89.1113	-40.0696	-104.37	-40.1001	-112.915	-40.1306	-123.291	-40.0696	-122.07	-40.0696	-149.536	-40.1001	-124.512	-40.1001	-146.484	-40.1001
0.136	-73.8525	-40.1001	-75.6836	-40.1001	-92.7734	-40.1001	-92.1631	-40.1001	-114.136	-40.1001	-92.7734	-40.1001	-105.591	-40.0696	-122.681	-40.1001	-89.7217	-40.1001	-115.356	-40.1001	-101.929	-40.1001	-98.2666	-40.1001	-95.2148	-40.1001	-129.395	-40.1306	-134.277	-40.1001	-128.784	-40.1001	-132.446	-40.1001	-122.07	-40.1001	-147.705	-40.1001
0.1365	-80.5664	-40.1001	-67.749	-40.1001	-64.0869	-40.1001	-107.422	-40.1001	-112.305	-40.1306	-95.2148	-40.1001	-94.6045	-40.1306	-129.395	-40.1001	-93.3838	-40.1306	-133.667	-40.1306	-113.525	-40.1001	-86.6699	-40.0696	-107.422	-40.1001	-123.901	-40.0696	-115.967	-40.0696	-146.484	-40.0696	-133.667	-40.1611	-122.07	-40.1306	-140.991	-40.1001
0.137	-86.0596	-40.1306	-67.1387	-40.1001	-65.3076	-40.1001	-103.76	-40.0696	-97.0459	-40.1001	-96.4355	-40.1001	-96.4355	-40.1001	-136.719	-40.0391	-90.332	-40.1001	-130.005	-40.1001	-107.422	-40.1306	-92.1631	-40.1001	-91.5527	-40.1001	-128.784	-40.0696	-122.07	-40.1001	-117.188	-40.1001	-152.588	-40.1001	-120.239	-40.1306	-144.043	-40.1001
0.1375	-59.8145	-40.1306	-54.9316	-40.1306	-88.501	-40.1001	-116.577	-40.1306	-98.2666	-40.1306	-97.6563	-40.1001	-98.2666	-40.1001	-141.602	-40.1001	-95.8252	-40.1001	-120.239	-40.1001	-122.681	-40.1306	-95.2148	-40.0696	-95.8252	-40.1001	-125.732	-40.1001	-122.07	-40.1001	-135.498	-40.1001	-134.888	-40.1001	-126.343	-40.0696	-133.667	-40.1001
0.138	-80.5664	-40.1001	-64.6973	-40.1001	-79.3457	-40.1001	-106.812	-40.1306	-92.7734	-40.0696	-90.9424	-40.1001	-89.1113	-40.1001	-137.329	-40.1001	-84.8389	-40.1001	-108.643	-40.1001	-104.37	-40.1001	-86.6699	-40.1001	-101.318	-40.1306	-120.239	-40.0696	-117.798	-40.1001	-114.746	-40.1306	-154.419	-40.1001	-121.46	-40.1001	-147.095	-40.1001
0.1385	-72.0215	-40.1001	-56.1523	-40.1001	-64.0869	-40.1001	-111.694	-40.0696	-90.9424	-40.1001	-114.136	-40.1001	-97.0459	-40.0696	-123.901	-40.1001	-87.8906	-40.1306	-121.46	-40.1001	-119.019	-40.1306	-97.6563	-40.1001	-114.136	-40.1001	-101.318	-40.1306	-127.563	-40.1306	-120.239	-40.0696	-146.484	-40.1001	-113.525	-40.1001	-153.198	-40.1001
0.139	-77.5146	-40.1001	-66.5283	-40.1001	-70.1904	-40.0696	-115.356	-40.1001	-94.6045	-40.0696	-108.032	-40.1001	-98.2666	-40.0696	-125.122	-40.1306	-86.6699	-40.1001	-114.746	-40.1306	-109.253	-40.1306	-96.4355	-40.0696	-100.708	-40.1001	-134.888	-40.1001	-122.07	-40.0696	-123.291	-40.1001	-148.926	-40.0696	-122.681	-40.0696	-148.315	-40.1001
0.1395	-59.2041	-40.1306	-61.0352	-40.1001	-79.3457	-40.0696	-100.708	-40.1001	-95.8252	-40.1001	-99.4873	-40.1001	-97.0459	-40.0696	-123.291	-40.1001	-72.0215	-40.1306	-114.136	-40.1001	-113.525	-40.1001	-95.2148	-40.1001	-98.2666	-40.1306	-115.356	-40.1001	-115.356	-40.1001	-119.629	-40.1001	-134.277	-40.1001	-111.084	-40.1306	-144.653	-40.0696
0.14	-57.373	-40.1001	-64.6973	-40.1306	-62.2559	-40.1001	-104.98	-40.0696	-74.4629	-40.1306	-98.877	-40.1001	-100.098	-40.1306	-101.929	-40.1001	-73.2422	-40.0696	-108.032	-40.1001	-117.188	-40.1306	-111.694	-40.1001	-101.929	-40.1306	-132.446	-40.1001	-121.46	-40.1001	-111.694	-40.1001	-134.277	-40.1001	-126.343	-40.1306	-126.343	-40.1001
0.1405	-78.7354	-40.1306	-72.6318	-40.1306	-62.8662	-40.0696	-105.591	-40.1001	-105.591	-40.1306	-97.0459	-40.1001	-92.1631	-40.1001	-103.149	-40.1001	-82.3975	-40.1001	-101.929	-40.1306	-119.629	-40.1001	-100.708	-40.1001	-97.0459	-40.1001	-114.746	-40.1001	-125.122	-40.1001	-115.356	-40.1001	-150.146	-40.1001	-113.525	-40.1001	-137.329	-40.0696
0.141	-64.6973	-40.1001	-68.9697	-40.0696	-78.7354	-40.1001	-100.098	-40.0696	-90.332	-40.0696	-96.4355	-40.1001	-109.863	-40.0696	-116.577	-40.1001	-67.1387	-40.1001	-122.07	-40.1001	-113.525	-40.1306	-113.525	-40.1001	-101.929	-40.1001	-114.746	-40.1306	-128.174	-40.0696	-119.019	-40.1001	-151.978	-40.0696	-115.967	-40.1001	-145.264	-40.1306
0.1415	-68.9697	-40.1001	-61.6455	-40.1001	-64.0869	-40.1001	-117.798	-40.0696	-104.37	-40.1306	-100.708	-40.1306	-104.37	-40.0696	-95.8252	-40.0696	-81.1768	-40.0696	-115.967	-40.1001	-113.525	-40.1001	-114.136	-40.1306	-114.746	-40.0696	-115.967	-40.1001	-115.967	-40.1001	-101.929	-40.1001	-141.602	-40.1001	-125.732	-40.1001	-164.185	-40.0696
0.142	-76.2939	-40.1001	-76.2939	-40.1001	-71.4111	-40.1001	-101.929	-40.1001	-103.149	-40.1001	-100.098	-40.0696	-107.422	-40.1001	-100.708	-40.0391	-81.1768	-40.1001	-105.591	-40.1001	-119.629	-40.1001	-113.525	-40.1306	-101.318	-40.0696	-112.915	-40.1001	-105.591	-40.1001	-112.915	-40.1001	-137.939	-40.1306	-104.98	-40.1001	-156.86	-40.1001
0.1425	-70.1904	-40.0696	-67.749	-40.1001	-64.0869	-40.1001	-106.812	-40.1306	-85.4492	-40.1001	-108.032	-40.1001	-115.967	-40.0696	-104.98	-40.1001	-83.0078	-40.1306	-109.863	-40.1001	-127.563	-40.1001	-100.708	-40.1001	-100.098	-40.1001	-108.643	-40.0696	-123.291	-40.1001	-116.577	-40.1306	-137.939	-40.1001	-109.863	-40.0696	-151.978	-40.1001
0.143	-81.1768	-40.0696	-67.749	-40.1001	-68.9697	-40.1001	-96.4355	-40.1001	-97.6563	-40.1306	-93.3838	-40.1001	-109.863	-40.1001	-97.6563	-40.1001	-72.0215	-40.0696	-120.85	-40.1001	-114.746	-40.1001	-126.953	-40.0696	-108.032	-40.1306	-112.915	-40.0696	-124.512	-40.1001	-111.694	-40.1001	-128.174	-40.1001	-110.474	-40.1001	-136.719	-40.1001
0.1435	-80.5664	-40.1306	-74.4629	-40.1306	-77.5146	-40.0696	-79.9561	-40.1001	-92.7734	-40.1001	-103.149	-40.1001	-103.76	-40.1001	-114.746	-40.1001	-80.5664	-40.1001	-115.967	-40.1001	-123.901	-40.1001	-117.798	-40.1001	-91.5527	-40.1001	-95.2148	-40.1001	-125.122	-40.1001	-117.188	-40.1001	-136.108	-40.0696	-134.277	-40.1001	-150.146	-40.1001
0.144	-73.8525	-40.1001	-59.2041	-40.1306	-59.2041	-40.1001	-96.4355	-40.0696	-90.332	-40.1001	-100.098	-40.1001	-104.98	-40.1001	-101.318	-40.0696	-76.2939	-40.1001	-114.136	-40.1001	-112.305	-40.1001	-100.098	-40.0696	-106.812	-40.0696	-109.863	-40.1001	-125.732	-40.1001	-111.084	-40.1001	-145.874	-40.1001	-115.967	-40.1306	-133.057	-40.0696
0.1445	-87.8906	-40.0696	-66.5283	-40.1001	-79.3457	-40.1001	-106.201	-40.1001	-97.6563	-40.1001	-90.332	-40.1001	-100.098	-40.1001	-112.305	-40.0696	-75.0732	-40.1001	-114.136	-40.0696	-131.226	-40.1001	-118.408	-40.1001	-105.591	-40.1001	-106.812	-40.1001	-126.953	-40.1001	-123.901	-40.1001	-130.615	-40.1001	-113.525	-40.1001	-142.212	-40.1001
0.145	-79.3457	-40.1306	-76.9043	-40.1306	-79.9561	-40.1001	-104.37	-40.1001	-106.201	-40.1001	-100.098	-40.1306	-106.201	-40.1306	-127.563	-40.1001	-87.2803	-40.1001	-114.746	-40.1001	-128.174	-40.1306	-104.37	-40.1001	-115.967	-40.1001	-123.901	-40.1001	-123.901	-40.0696	-110.474	-40.0696	-148.926	-40.1001	-127.563	-40.1001	-137.329	-40.1001
0.1455	-73.2422	-40.1001	-58.5938	-40.1001	-67.749	-40.1001	-107.422	-40.1001	-110.474	-40.1306	-92.7734	-40.0696	-103.149	-40.1001	-115.967	-40.1001	-81.7871	-40.1001	-109.253	-40.1001	-130.005	-40.1306	-104.98	-40.1001	-96.4355	-40.1001	-128.784	-40.1001	-105.591	-40.1001	-111.694	-40.1001	-146.484	-40.1001	-116.577	-40.1001	-134.277	-40.1001
0.146	-72.6318	-40.1001	-61.0352	-40.1001	-83.6182	-40.1001	-115.356	-40.1001	-92.7734	-40.1306	-100.098	-40.1306	-119.019	-40.1001	-121.46	-40.0696	-80.5664	-40.1001	-97.0459	-40.1001	-99.4873	-40.1001	-113.525	-40.1001	-124.512	-40.1001	-129.395	-40.0696	-122.07	-40.1001	-117.798	-40.1001	-153.198	-40.1001	-98.2666	-40.1306	-139.16	-40.0696
0.1465	-70.1904	-40.1001	-62.8662	-40.1306	-79.9561	-40.1001	-100.098	-40.1001	-100.098	-40.0696	-84.2285	-40.1306	-103.149	-40.0696	-103.149	-40.1306	-72.0215	-40.0696	-101.318	-40.0696	-107.422	-40.1001	-108.643	-40.0696	-113.525	-40.1001	-123.291	-40.1611	-120.239	-40.1001	-112.915	-40.1001	-136.108	-40.1001	-112.915	-40.1001	-128.784	-40.1001
0.147	-71.4111	-40.1306	-75.0732	-40.1001	-73.2422	-40.1001	-105.591	-40.1001	-92.7734	-40.1001	-90.9424	-40.1001	-98.2666	-40.1001	-100.098	-40.1001	-69.5801	-40.1001	-104.37	-40.1001	-98.2666	-40.1001	-114.136	-40.0696	-111.694	-40.1001	-120.239	-40.0696	-108.032	-40.1001	-112.915	-40.1001	-156.25	-40.0696	-118.408	-40.0696	-138.55	-40.1001
0.1475	-76.2939	-40.1306	-70.8008	-40.1001	-55.542	-40.1001	-94.6045	-40.0696	-84.8389	-40.1001	-89.1113	-40.1001	-104.98	-40.1306	-96.4355	-40.1001	-74.4629	-40.1001	-103.76	-40.1001	-114.136	-40.1001	-111.084	-40.0696	-119.629	-40.0696	-120.85	-40.1001	-111.084	-40.1001	-115.356	-40.0696	-149.536	-40.1001	-102.539	-40.0696	-142.822	-40.1001
0.148	-77.5146	-40.1001	-76.9043	-40.1306	-59.2041	-40.1001	-108.032	-40.1001	-92.7734	-40.1306	-100.708	-40.1001	-109.863	-40.0696	-97.0459	-40.1001	-70.1904	-40.0696	-102.539	-40.1001	-109.863	-40.1306	-96.4355	-40.1001	-117.798	-40.1001	-127.563	-40.1306	-115.356	-40.1001	-114.136	-40.0696	-145.874	-40.1001	-97.0459	-40.0696	-132.446	-40.0696
0.1485	-79.9561	-40.1306	-67.1387	-40.1001	-51.8799	-40.0696	-98.2666	-40.1306	-97.6563	-40.1306	-92.1631	-40.1001	-108.032	-40.1001	-112.305	-40.1001	-73.8525	-40.1306	-109.863	-40.1001	-101.318	-40.1001	-104.98	-40.1001	-114.746	-40.1001	-126.343	-40.0696	-120.239	-40.1001	-118.408	-40.1001	-124.512	-40.1306	-123.291	-40.1001	-134.277	-40.0696
0.149	-79.9561	-40.0696	-48.8281	-40.1001	-61.0352	-40.1001	-112.305	-40.0696	-82.3975	-40.1306	-91.5527	-40.1306	-110.474	-40.1306	-99.4873	-40.0696	-92.1631	-40.1001	-106.201	-40.1306	-98.877	-40.1001	-104.37	-40.1001	-104.98	-40.1001	-125.122	-40.1001	-108.643	-40.1306	-114.136	-40.1306	-137.329	-40.1001	-120.85	-40.1001	-130.005	-40.1001
0.1495	-77.5146	-40.0391	-62.2559	-40.1001	-54.3213	-40.1001	-92.1631	-40.1001	-98.2666	-40.1001	-78.125	-40.1306	-124.512	-40.1001	-108.032	-40.1001	-83.0078	-40.0696	-110.474	-40.1306	-109.863	-40.1001	-90.9424	-40.1001	-110.474	-40.0696	-141.602	-40.1001	-103.76	-40.1001	-122.07	-40.0696	-157.471	-40.1001	-108.643	-40.0696	-134.277	-40.0696
0.15	-76.2939	-40.0696	-71.4111	-40.1001	-63.4766	-40.1001	-92.1631	-40.1001	-83.0078	-40.1001	-96.4355	-40.1001	-113.525	-40.1001	-98.877	-40.1001	-79.9561	-40.0696	-108.643	-40.1001	-98.877	-40.1001	-100.098	-40.0696	-100.708	-40.1306	-135.498	-40.1001	-93.3838	-40.1306	-123.901	-40.1001	-139.771	-40.0696	-122.07	-40.1001	-130.005	-40.1306
0.1505	-73.8525	-40.1001	-68.9697	-40.1001	-75.6836	-40.1001	-79.3457	-40.1001	-76.9043	-40.1001	-99.4873	-40.0696	-118.408	-40.1306	-109.253	-40.1001	-83.0078	-40.1306	-106.201	-40.0696	-115.356	-40.0696	-94.6045	-40.1001	-101.929	-40.1001	-120.85	-40.0696	-114.746	-40.1001	-123.291	-40.1001	-134.888	-40.1001	-125.122	-40.0696	-120.85	-40.0696
0.151	-82.3975	-40.1306	-83.6182	-40.1001	-62.2559	-40.1001	-90.9424	-40.1001	-83.0078	-40.1001	-90.332	-40.1001	-116.577	-40.1001	-100.708	-40.1001	-89.7217	-40.1001	-97.6563	-40.1306	-103.76	-40.0696	-96.4355	-40.0696	-98.2666	-40.1001	-129.395	-40.1001	-120.239	-40.1001	-128.174	-40.1001	-150.146	-40.1001	-128.784	-40.1001	-133.667	-40.1001
0.1515	-75.0732	-40.1001	-67.749	-40.1001	-63.4766	-40.1001	-91.5527	-40.1306	-74.4629	-40.1306	-100.098	-40.1001	-104.37	-40.1001	-78.7354	-40.0696	-85.4492	-40.1001	-90.332	-40.1001	-110.474	-40.1001	-90.9424	-40.0696	-111.694	-40.1001	-123.901	-40.1001	-122.07	-40.1001	-132.446	-40.1001	-149.536	-40.0696	-126.343	-40.0696	-122.681	-40.1306
0.152	-72.0215	-40.1306	-57.373	-40.1001	-78.125	-40.1001	-100.708	-40.1001	-67.1387	-40.0696	-108.643	-40.1001	-125.122	-40.1001	-97.6563	-40.1001	-77.5146	-40.1611	-106.812	-40.1001	-95.2148	-40.1001	-105.591	-40.1001	-110.474	-40.0696	-125.732	-40.0696	-134.277	-40.1001	-125.732	-40.1001	-153.198	-40.0696	-140.381	-40.1001	-138.55	-40.1001
0.1525	-76.2939	-40.1001	-62.8662	-40.1306	-85.4492	-40.1001	-106.812	-40.0696	-71.4111	-40.1001	-93.3838	-40.1001	-126.343	-40.1306	-108.643	-40.1306	-93.3838	-40.0696	-97.0459	-40.1001	-100.708	-40.0696	-76.2939	-40.1001	-95.8252	-40.1611	-130.615	-40.1001	-121.46	-40.1306	-123.291	-40.0696	-155.64	-40.1306	-131.836	-40.0696	-143.433	-40.0696
0.153	-79.9561	-40.1001	-68.3594	-40.1306	-69.5801	-40.1001	-117.188	-40.0696	-92.7734	-40.1306	-89.7217	-40.1306	-112.915	-40.1001	-112.915	-40.1001	-81.1768	-40.1001	-101.318	-40.1001	-108.643	-40.1001	-92.1631	-40.1001	-103.76	-40.1001	-118.408	-40.1001	-108.643	-40.1001	-131.836	-40.0696	-151.978	-40.1001	-134.888	-40.1001	-138.55	-40.1001
0.1535	-91.5527	-40.1001	-63.4766	-40.1001	-64.0869	-40.1001	-112.915	-40.0696	-89.7217	-40.1001	-101.318	-40.1001	-103.76	-40.0696	-98.877	-40.1001	-78.7354	-40.1001	-93.3838	-40.1001	-108.032	-40.1001	-100.098	-40.1001	-118.408	-40.1001	-127.563	-40.1001	-111.084	-40.1001	-127.563	-40.1001	-147.705	-40.1001	-130.615	-40.1001	-151.367	-40.1001
0.154	-70.1904	-40.0696	-67.1387	-40.1001	-58.5938	-40.1001	-116.577	-40.1001	-95.8252	-40.1001	-100.098	-40.1001	-99.4873	-40.0696	-107.422	-40.1001	-75.0732	-40.0696	-119.019	-40.0696	-115.356	-40.1001	-97.0459	-40.0696	-97.0459	-40.0696	-125.122	-40.1001	-104.98	-40.1306	-120.239	-40.1001	-146.484	-40.1001	-119.629	-40.1001	-150.146	-40.1001
0.1545	-66.5283	-40.1306	-65.918	-40.1001	-78.7354	-40.1001	-105.591	-40.1306	-90.9424	-40.1001	-91.5527	-40.1001	-115.356	-40.1001	-116.577	-40.1001	-87.8906	-40.1001	-116.577	-40.1306	-95.2148	-40.1611	-94.6045	-40.1001	-99.4873	-40.1001	-132.446	-40.1001	-123.901	-40.1001	-130.005	-40.1001	-141.602	-40.1001	-115.356	-40.1306	-133.057	-40.1001
0.155	-61.0352	-40.1001	-62.8662	-40.1001	-78.125	-40.0696	-79.9561	-40.1306	-83.0078	-40.1001	-89.1113	-40.0696	-112.305	-40.0696	-86.6699	-40.1306	-104.37	-40.1001	-98.877	-40.1001	-89.1113	-40.1001	-106.812	-40.1306	-97.6563	-40.0696	-136.108	-40.1001	-106.201	-40.1001	-122.07	-40.1306	-150.146	-40.0696	-111.084	-40.1001	-124.512	-40.1306
0.1555	-64.6973	-40.1001	-57.9834	-40.1001	-56.1523	-40.1001	-90.332	-40.1001	-88.501	-40.0696	-89.7217	-40.1001	-111.084	-40.1001	-98.2666	-40.1306	-89.1113	-40.1306	-103.149	-40.1001	-103.76	-40.0696	-93.9941	-40.0696	-101.929	-40.1001	-124.512	-40.1001	-98.2666	-40.1306	-122.681	-40.0696	-154.419	-40.1001	-114.746	-40.1306	-150.146	-40.1001
0.156	-72.6318	-40.1306	-56.7627	-40.1306	-64.6973	-40.1001	-94.6045	-40.1001	-92.1631	-40.1001	-95.2148	-40.1001	-110.474	-40.1001	-114.136	-40.1001	-96.4355	-40.1001	-104.37	-40.1306	-106.201	-40.0696	-109.863	-40.1001	-111.694	-40.1001	-110.474	-40.0696	-120.239	-40.1001	-127.563	-40.1001	-155.64	-40.1306	-117.188	-40.1001	-140.381	-40.1001
0.1565	-57.9834	-40.1001	-64.6973	-40.1001	-61.6455	-40.1001	-96.4355	-40.1306	-79.9561	-40.1001	-90.9424	-40.1001	-111.694	-40.1001	-103.149	-40.1001	-97.0459	-40.1001	-114.136	-40.1306	-98.877	-40.0696	-88.501	-40.1001	-111.694	-40.1001	-115.356	-40.1001	-111.694	-40.1001	-125.122	-40.0696	-120.85	-40.1001	-125.732	-40.0696	-160.522	-40.1001
0.157	-70.8008	-40.0696	-61.0352	-40.1001	-64.0869	-40.1306	-99.4873	-40.1001	-86.0596	-40.1001	-79.3457	-40.1306	-115.967	-40.1306	-106.812	-40.0696	-88.501	-40.0696	-95.2148	-40.1306	-104.98	-40.1001	-92.1631	-40.1001	-112.305	-40.0696	-131.226	-40.0696	-101.929	-40.0696	-120.239	-40.1001	-145.264	-40.1001	-132.446	-40.1001	-146.484	-40.1001
0.1575	-76.2939	-40.0696	-68.9697	-40.1001	-72.6318	-40.1306	-98.877	-40.1001	-100.098	-40.1306	-83.0078	-40.1001	-102.539	-40.1001	-101.318	-40.1001	-78.125	-40.1001	-95.8252	-40.1001	-109.863	-40.1001	-90.9424	-40.1001	-111.694	-40.0696	-127.563	-40.0696	-116.577	-40.1306	-114.746	-40.1001	-158.691	-40.1001	-117.798	-40.1001	-137.329	-40.1306
0.158	-72.6318	-40.1001	-71.4111	-40.1001	-73.2422	-40.0696	-103.76	-40.0696	-95.2148	-40.1001	-73.8525	-40.1001	-104.98	-40.0696	-100.098	-40.1001	-90.332	-40.0696	-112.305	-40.1001	-109.253	-40.1001	-86.6699	-40.1001	-109.863	-40.1001	-118.408	-40.1001	-112.305	-40.1001	-115.967	-40.1001	-152.588	-40.1001	-120.85	-40.0696	-144.653	-40.1001
0.1585	-77.5146	-40.1001	-66.5283	-40.0696	-69.5801	-40.1001	-97.0459	-40.1001	-81.7871	-40.0696	-105.591	-40.1001	-98.877	-40.1306	-102.539	-40.1001	-83.0078	-40.1306	-121.46	-40.1001	-100.708	-40.1306	-93.3838	-40.1001	-111.694	-40.1001	-142.822	-40.0696	-106.812	-40.0696	-104.98	-40.1001	-149.536	-40.1001	-113.525	-40.1001	-148.926	-40.1306
0.159	-62.8662	-40.1306	-62.8662	-40.1001	-74.4629	-40.1306	-104.98	-40.0696	-83.0078	-40.1001	-86.0596	-40.1001	-111.694	-40.0696	-98.2666	-40.1001	-89.1113	-40.1001	-112.305	-40.1001	-102.539	-40.1001	-87.8906	-40.0696	-116.577	-40.1001	-142.822	-40.1001	-114.136	-40.1001	-134.888	-40.0696	-159.302	-40.1001	-120.239	-40.1001	-150.146	-40.1001
0.1595	-59.8145	-40.1001	-63.4766	-40.1001	-82.3975	-40.1001	-106.201	-40.0696	-90.332	-40.1001	-90.9424	-40.1001	-110.474	-40.1001	-96.4355	-40.1306	-84.2285	-40.1306	-100.098	-40.1001	-107.422	-40.1001	-81.7871	-40.0696	-126.953	-40.1001	-131.836	-40.1001	-110.474	-40.0696	-114.746	-40.1306	-134.277	-40.1001	-113.525	-40.0696	-135.498	-40.1001
0.16	-49.4385	-40.1001	-58.5938	-40.1001	-90.9424	-40.1306	-103.149	-40.0696	-87.8906	-40.1001	-90.9424	-40.1001	-105.591	-40.1306	-94.6045	-40.1001	-81.1768	-40.1001	-109.863	-40.1306	-105.591	-40.0696	-87.2803	-40.0696	-101.929	-40.1001	-135.498	-40.1001	-99.4873	-40.1001	-126.953	-40.0696	-117.798	-40.0696	-112.305	-40.1001	-137.329	-40.1001
0.1605	-81.1768	-40.1001	-54.3213	-40.1001	-78.7354	-40.1306	-106.812	-40.1001	-85.4492	-40.1001	-99.4873	-40.1001	-109.863	-40.1001	-100.098	-40.1001	-95.2148	-40.1001	-125.122	-40.1001	-128.174	-40.1001	-102.539	-40.1001	-97.6563	-40.1001	-145.264	-40.1001	-112.305	-40.1001	-111.694	-40.1001	-124.512	-40.0696	-116.577	-40.0696	-144.043	-40.1001
0.161	-56.7627	-40.0696	-56.7627	-40.0696	-65.3076	-40.1001	-121.46	-40.1001	-93.3838	-40.0696	-102.539	-40.1306	-117.188	-40.1001	-92.7734	-40.0696	-88.501	-40.1001	-113.525	-40.1001	-98.877	-40.1001	-98.877	-40.1001	-101.318	-40.1001	-130.615	-40.1001	-114.136	-40.1001	-125.122	-40.1001	-140.381	-40.1001	-119.629	-40.0696	-140.381	-40.1306
0.1615	-65.3076	-40.1001	-57.9834	-40.0696	-75.6836	-40.1001	-111.084	-40.1306	-105.591	-40.1001	-97.6563	-40.0696	-103.76	-40.1001	-102.539	-40.1001	-85.4492	-40.1001	-125.732	-40.1001	-88.501	-40.1001	-86.0596	-40.1306	-130.615	-40.0696	-132.446	-40.1001	-117.798	-40.1001	-117.798	-40.1306	-130.005	-40.1001	-128.174	-40.1001	-169.067	-40.1306
0.162	-83.0078	-40.1001	-68.9697	-40.1306	-70.8008	-40.1306	-104.98	-40.1001	-122.07	-40.1001	-98.2666	-40.1001	-104.98	-40.1306	-100.708	-40.1001	-81.7871	-40.0696	-121.46	-40.1001	-104.98	-40.0696	-101.929	-40.1001	-99.4873	-40.0696	-136.108	-40.1001	-112.915	-40.1001	-120.85	-40.1001	-137.329	-40.1306	-118.408	-40.1306	-134.277	-40.1001
0.1625	-68.9697	-40.1001	-73.2422	-40.0696	-70.8008	-40.0696	-112.915	-40.1306	-111.694	-40.1306	-79.9561	-40.0696	-122.07	-40.1001	-100.098	-40.1001	-85.4492	-40.1001	-119.629	-40.1001	-90.9424	-40.1001	-92.7734	-40.1001	-87.2803	-40.1306	-138.55	-40.1001	-126.953	-40.1001	-126.953	-40.1001	-142.212	-40.1001	-119.019	-40.1001	-145.264	-40.1001
0.163	-54.9316	-40.1001	-78.125	-40.1001	-65.918	-40.1001	-96.4355	-40.1001	-104.98	-40.1001	-82.3975	-40.1001	-114.746	-40.1001	-98.2666	-40.1306	-85.4492	-40.0696	-111.084	-40.1001	-103.149	-40.0696	-101.318	-40.1306	-103.76	-40.1306	-128.784	-40.1001	-110.474	-40.1001	-123.901	-40.1001	-128.784	-40.1001	-103.76	-40.0696	-130.615	-40.1001
0.1635	-81.1768	-40.1001	-73.8525	-40.1001	-84.2285	-40.1001	-65.918	-40.1001	-83.6182	-40.1001	-78.125	-40.0696	-108.032	-40.1001	-93.9941	-40.1001	-86.6699	-40.1001	-129.395	-40.1001	-103.149	-40.0696	-98.2666	-40.0696	-93.3838	-40.1001	-133.667	-40.1306	-111.694	-40.1001	-122.07	-40.1001	-133.057	-40.1001	-120.239	-40.0696	-137.939	-40.1001
0.164	-64.0869	-40.1306	-67.1387	-40.1001	-75.0732	-40.1001	-92.1631	-40.0696	-100.708	-40.1001	-109.253	-40.0696	-104.37	-40.1306	-97.6563	-40.1306	-90.9424	-40.1001	-92.1631	-40.1001	-99.4873	-40.1001	-94.6045	-40.1306	-112.305	-40.1001	-131.226	-40.1306	-89.7217	-40.0696	-140.991	-40.0696	-134.888	-40.0696	-109.253	-40.1001	-133.057	-40.0696
0.1645	-63.4766	-40.1001	-69.5801	-40.1001	-83.6182	-40.1001	-111.694	-40.0696	-100.708	-40.1001	-99.4873	-40.1001	-115.967	-40.1001	-93.3838	-40.0696	-102.539	-40.1001	-102.539	-40.0696	-102.539	-40.1306	-87.8906	-40.1001	-95.2148	-40.1001	-118.408	-40.0696	-106.201	-40.0696	-133.057	-40.0696	-133.667	-40.1001	-109.253	-40.1001	-141.602	-40.1001
0.165	-76.2939	-40.1306	-73.8525	-40.1001	-81.1768	-40.1306	-94.6045	-40.1001	-125.122	-40.1001	-103.149	-40.1001	-100.708	-40.1001	-112.915	-40.0696	-89.1113	-40.1001	-119.019	-40.1306	-110.474	-40.1001	-104.98	-40.1001	-111.694	-40.1001	-145.264	-40.1001	-115.967	-40.1001	-104.37	-40.1001	-128.174	-40.1001	-104.98	-40.1306	-123.901	-40.0696
0.1655	-72.0215	-40.1306	-70.1904	-40.1306	-87.2803	-40.1001	-89.7217	-40.1001	-104.37	-40.1001	-97.6563	-40.1001	-109.253	-40.0696	-106.201	-40.1001	-91.5527	-40.1001	-123.291	-40.1001	-111.694	-40.1306	-108.643	-40.1001	-109.253	-40.1001	-131.226	-40.1001	-88.501	-40.1306	-102.539	-40.1306	-134.277	-40.1001	-107.422	-40.1001	-140.991	-40.1306
0.166	-76.2939	-40.1001	-73.8525	-40.0696	-74.4629	-40.1001	-97.0459	-40.1001	-107.422	-40.1001	-89.1113	-40.0696	-114.136	-40.1001	-104.37	-40.0696	-93.9941	-40.0696	-103.76	-40.1001	-111.694	-40.1001	-97.6563	-40.1001	-113.525	-40.1001	-144.043	-40.1001	-101.318	-40.0696	-103.149	-40.1001	-124.512	-40.1001	-109.863	-40.0696	-133.057	-40.1306
0.1665	-88.501	-40.1001	-77.5146	-40.0696	-78.7354	-40.1001	-105.591	-40.1001	-101.318	-40.0696	-100.708	-40.1001	-105.591	-40.1001	-109.253	-40.0696	-90.332	-40.1001	-114.746	-40.1001	-106.201	-40.1001	-91.5527	-40.1001	-103.149	-40.1001	-105.591	-40.1001	-116.577	-40.1001	-111.084	-40.1001	-117.798	-40.1001	-99.4873	-40.1001	-144.653	-40.0696
0.167	-73.8525	-40.1001	-73.2422	-40.1001	-85.4492	-40.0696	-100.098	-40.1306	-98.877	-40.1001	-98.2666	-40.1001	-104.37	-40.1306	-117.798	-40.1001	-78.7354	-40.1001	-101.318	-40.0696	-100.708	-40.0696	-93.9941	-40.1001	-123.901	-40.1001	-131.226	-40.1001	-108.032	-40.1001	-111.694	-40.0696	-107.422	-40.1306	-101.929	-40.1001	-156.25	-40.0696
0.1675	-73.2422	-40.1001	-74.4629	-40.0696	-88.501	-40.1001	-95.8252	-40.1001	-104.37	-40.1001	-100.708	-40.0696	-109.863	-40.1001	-132.446	-40.1306	-79.3457	-40.1001	-83.0078	-40.1306	-104.37	-40.1001	-102.539	-40.1001	-110.474	-40.1001	-130.615	-40.0696	-116.577	-40.0696	-119.629	-40.1001	-117.798	-40.1001	-111.084	-40.1306	-133.057	-40.1001
0.168	-85.4492	-40.1001	-82.3975	-40.0696	-73.8525	-40.1001	-106.201	-40.1001	-101.929	-40.1001	-94.6045	-40.1001	-123.291	-40.1306	-122.681	-40.1001	-80.5664	-40.1001	-95.2148	-40.1001	-108.032	-40.1001	-103.76	-40.1306	-118.408	-40.1306	-130.005	-40.1001	-102.539	-40.1306	-115.356	-40.0696	-121.46	-40.1001	-104.98	-40.1001	-136.108	-40.0696
0.1685	-69.5801	-40.1306	-81.1768	-40.1306	-58.5938	-40.1001	-81.1768	-40.1001	-84.8389	-40.1001	-100.708	-40.1001	-115.967	-40.0696	-125.732	-40.1306	-77.5146	-40.1001	-104.37	-40.1001	-95.8252	-40.0696	-102.539	-40.1001	-111.084	-40.1001	-134.888	-40.1001	-100.098	-40.0696	-120.85	-40.0696	-133.667	-40.1001	-120.239	-40.1001	-137.939	-40.1001
0.169	-71.4111	-40.1001	-75.6836	-40.1001	-55.542	-40.1001	-99.4873	-40.1001	-98.2666	-40.1001	-90.332	-40.1001	-120.239	-40.1001	-120.85	-40.1001	-97.6563	-40.1001	-109.253	-40.1001	-97.0459	-40.0696	-98.2666	-40.1001	-119.629	-40.1001	-128.784	-40.0696	-117.188	-40.0696	-132.446	-40.1001	-144.043	-40.0696	-119.019	-40.1001	-127.563	-40.1001
0.1695	-76.9043	-40.1001	-73.2422	-40.1001	-61.6455	-40.1306	-103.76	-40.1001	-89.1113	-40.1001	-89.1113	-40.1001	-124.512	-40.1306	-127.563	-40.1001	-95.2148	-40.0696	-118.408	-40.0696	-106.201	-40.1306	-90.9424	-40.1001	-125.122	-40.1001	-137.329	-40.1001	-103.149	-40.1306	-136.108	-40.1001	-151.367	-40.1001	-124.512	-40.1001	-126.343	-40.1306
0.17	-65.918	-40.1001	-67.1387	-40.1306	-71.4111	-40.1001	-106.201	-40.1001	-88.501	-40.1306	-90.9424	-40.0696	-122.07	-40.1001	-109.863	-40.1001	-79.3457	-40.1001	-123.291	-40.1001	-111.084	-40.1001	-106.201	-40.0696	-124.512	-40.0696	-151.978	-40.1001	-100.708	-40.1001	-120.239	-40.1001	-147.095	-40.1306	-123.291	-40.1001	-117.188	-40.1306
0.1705	-83.6182	-40.1001	-77.5146	-40.1001	-82.3975	-40.1001	-93.9941	-40.1001	-89.7217	-40.1306	-100.098	-40.0696	-123.291	-40.0696	-133.667	-40.1001	-87.2803	-40.1001	-116.577	-40.1001	-113.525	-40.1001	-87.2803	-40.0696	-130.615	-40.1306	-139.771	-40.1306	-112.915	-40.0696	-129.395	-40.1306	-131.226	-40.1001	-109.253	-40.0696	-128.174	-40.1001
0.171	-74.4629	-40.1306	-61.6455	-40.1001	-60.4248	-40.0696	-95.2148	-40.0696	-87.2803	-40.0696	-87.8906	-40.1001	-108.643	-40.1001	-113.525	-40.1306	-82.3975	-40.1001	-100.708	-40.1001	-101.929	-40.1001	-81.7871	-40.1001	-118.408	-40.1001	-118.408	-40.1001	-109.863	-40.1001	-136.719	-40.1001	-135.498	-40.1306	-96.4355	-40.1001	-121.46	-40.0696
0.1715	-77.5146	-40.1001	-69.5801	-40.1001	-73.8525	-40.1001	-89.1113	-40.1001	-89.1113	-40.1001	-75.6836	-40.1001	-94.6045	-40.1001	-115.967	-40.1001	-90.332	-40.1001	-112.915	-40.1001	-101.929	-40.0696	-93.9941	-40.1001	-113.525	-40.1306	-141.602	-40.1001	-112.305	-40.0696	-120.239	-40.0696	-138.55	-40.1001	-114.746	-40.1001	-127.563	-40.0696
0.172	-68.3594	-40.1001	-61.6455	-40.1001	-70.1904	-40.1001	-91.5527	-40.1001	-100.098	-40.1001	-82.3975	-40.1001	-109.253	-40.1001	-115.967	-40.1306	-90.9424	-40.1306	-117.798	-40.1001	-100.708	-40.1001	-110.474	-40.1001	-117.798	-40.1001	-132.446	-40.1001	-119.629	-40.1001	-141.602	-40.0696	-142.822	-40.0696	-103.76	-40.1001	-146.484	-40.0696
0.1725	-78.125	-40.1306	-77.5146	-40.1001	-76.2939	-40.1306	-86.6699	-40.1001	-78.7354	-40.1306	-84.2285	-40.1001	-98.2666	-40.0696	-121.46	-40.1001	-89.1113	-40.1001	-107.422	-40.1306	-112.915	-40.0696	-92.7734	-40.1001	-129.395	-40.1001	-131.226	-40.0696	-118.408	-40.1001	-135.498	-40.1001	-125.732	-40.1001	-113.525	-40.1001	-156.86	-40.1001
0.173	-66.5283	-40.1001	-72.6318	-40.0696	-67.749	-40.1001	-98.877	-40.1001	-85.4492	-40.1001	-83.0078	-40.0696	-97.0459	-40.1001	-119.629	-40.1001	-83.0078	-40.1001	-112.305	-40.1001	-118.408	-40.1001	-98.877	-40.1001	-119.019	-40.1001	-145.264	-40.1306	-112.915	-40.0696	-134.888	-40.1001	-131.226	-40.1001	-111.694	-40.1001	-134.888	-40.0696
0.1735	-61.6455	-40.1001	-72.0215	-40.1001	-71.4111	-40.1001	-93.3838	-40.1001	-84.8389	-40.1001	-101.318	-40.1306	-123.291	-40.1001	-109.863	-40.1306	-93.3838	-40.1001	-128.174	-40.1001	-97.0459	-40.1306	-93.9941	-40.1001	-134.888	-40.1001	-142.822	-40.1001	-117.188	-40.1001	-134.277	-40.1001	-146.484	-40.1001	-126.343	-40.1001	-151.367	-40.1001
0.174	-73.2422	-40.1306	-81.1768	-40.1001	-67.1387	-40.1001	-87.2803	-40.1306	-113.525	-40.1001	-86.0596	-40.1001	-108.643	-40.1001	-109.253	-40.1001	-81.1768	-40.1306	-121.46	-40.0696	-105.591	-40.0696	-92.7734	-40.1306	-112.305	-40.1001	-128.174	-40.1306	-115.356	-40.1001	-131.226	-40.1001	-148.926	-40.1001	-120.85	-40.1306	-150.757	-40.1306
0.1745	-68.9697	-40.1001	-62.8662	-40.1001	-59.8145	-40.1001	-90.9424	-40.1001	-98.2666	-40.1306	-91.5527	-40.1001	-103.76	-40.1001	-119.629	-40.1306	-81.1768	-40.1001	-97.6563	-40.0696	-112.305	-40.0696	-100.708	-40.1001	-125.122	-40.1001	-131.836	-40.1306	-120.85	-40.1306	-137.329	-40.1306	-144.653	-40.1001	-110.474	-40.1306	-144.653	-40.1001
0.175	-66.5283	-40.1001	-71.4111	-40.1306	-77.5146	-40.1001	-108.032	-40.1306	-92.1631	-40.0696	-80.5664	-40.1001	-108.643	-40.1001	-98.2666	-40.1001	-100.098	-40.1306	-97.6563	-40.1306	-101.929	-40.0696	-84.2285	-40.1001	-120.239	-40.1001	-123.901	-40.1001	-123.291	-40.1306	-136.719	-40.1001	-148.926	-40.1001	-115.967	-40.1001	-142.212	-40.1001
0.1755	-57.373	-40.1001	-79.3457	-40.1001	-64.6973	-40.1001	-93.9941	-40.1001	-80.5664	-40.1001	-85.4492	-40.1001	-102.539	-40.1306	-101.318	-40.1306	-90.332	-40.1306	-100.708	-40.1001	-101.318	-40.1001	-94.6045	-40.1001	-125.732	-40.1001	-142.212	-40.1001	-122.681	-40.1001	-130.005	-40.1001	-132.446	-40.1001	-112.915	-40.0696	-152.588	-40.1001
0.176	-53.1006	-40.1306	-64.0869	-40.1306	-68.9697	-40.1001	-81.1768	-40.1001	-104.37	-40.1001	-76.2939	-40.0391	-93.3838	-40.1001	-115.967	-40.1001	-85.4492	-40.1001	-98.2666	-40.1001	-117.798	-40.0696	-87.8906	-40.1306	-120.85	-40.1001	-124.512	-40.1001	-111.694	-40.1001	-146.484	-40.1001	-130.615	-40.1001	-115.356	-40.1306	-156.25	-40.1001
0.1765	-54.3213	-40.1001	-67.749	-40.1306	-73.2422	-40.0696	-94.6045	-40.1306	-91.5527	-40.1001	-101.318	-40.1001	-86.0596	-40.1001	-115.356	-40.1001	-95.2148	-40.1001	-101.929	-40.1306	-117.188	-40.0696	-101.929	-40.0696	-116.577	-40.1001	-130.005	-40.1001	-111.084	-40.0696	-145.264	-40.0696	-149.536	-40.1001	-118.408	-40.1001	-161.743	-40.0696
0.177	-54.9316	-40.1001	-64.0869	-40.0696	-76.9043	-40.1001	-78.125	-40.1001	-89.7217	-40.0696	-79.3457	-40.0391	-101.929	-40.0696	-99.4873	-40.1001	-80.5664	-40.1001	-115.356	-40.1001	-102.539	-40.1001	-81.1768	-40.0696	-122.07	-40.0696	-141.602	-40.1306	-114.746	-40.1001	-126.343	-40.1001	-133.667	-40.1306	-106.812	-40.1001	-152.588	-40.1001
0.1775	-66.5283	-40.1001	-57.373	-40.1001	-72.0215	-40.1306	-90.9424	-40.1001	-91.5527	-40.1001	-81.1768	-40.1001	-100.098	-40.1001	-95.8252	-40.1001	-81.7871	-40.0696	-114.136	-40.1001	-114.136	-40.1001	-90.332	-40.1001	-128.174	-40.0696	-126.343	-40.1001	-112.915	-40.1001	-139.16	-40.1001	-150.146	-40.1306	-114.746	-40.1306	-140.991	-40.1306
0.178	-69.5801	-40.1001	-60.4248	-40.1001	-81.7871	-40.1001	-97.6563	-40.1306	-106.812	-40.1001	-84.8389	-40.1001	-98.877	-40.0696	-114.136	-40.1001	-85.4492	-40.0696	-112.915	-40.0696	-127.563	-40.1306	-93.3838	-40.1001	-114.746	-40.1001	-133.057	-40.0696	-97.6563	-40.1001	-137.329	-40.1001	-154.419	-40.0696	-122.07	-40.1001	-147.095	-40.1001
0.1785	-68.3594	-40.1001	-60.4248	-40.1001	-76.2939	-40.1001	-86.6699	-40.1001	-98.2666	-40.1001	-108.032	-40.0696	-80.5664	-40.1001	-131.226	-40.1001	-92.7734	-40.0696	-101.929	-40.0696	-121.46	-40.1001	-98.2666	-40.1001	-120.239	-40.1001	-130.615	-40.1001	-109.863	-40.1001	-112.305	-40.1001	-149.536	-40.1001	-118.408	-40.1001	-155.029	-40.1306
0.179	-76.9043	-40.1001	-64.6973	-40.1001	-80.5664	-40.1001	-80.5664	-40.1306	-92.1631	-40.1001	-106.201	-40.1001	-100.708	-40.1001	-115.967	-40.1001	-76.9043	-40.1306	-116.577	-40.1001	-124.512	-40.0696	-81.7871	-40.1001	-103.76	-40.0696	-129.395	-40.1001	-108.643	-40.1306	-138.55	-40.1306	-141.602	-40.1001	-116.577	-40.1001	-154.419	-40.1001
0.1795	-73.2422	-40.1611	-64.6973	-40.1001	-89.1113	-40.1001	-90.332	-40.1001	-83.0078	-40.1306	-124.512	-40.1001	-88.501	-40.1001	-111.084	-40.1306	-92.1631	-40.1306	-101.318	-40.1306	-111.694	-40.0696	-84.2285	-40.1001	-98.2666	-40.1001	-111.084	-40.1001	-111.694	-40.0696	-127.563	-40.1001	-142.212	-40.1306	-113.525	-40.1001	-161.133	-40.1001
0.18	-78.125	-40.1001	-59.8145	-40.1001	-83.0078	-40.1001	-78.7354	-40.1306	-89.1113	-40.1306	-113.525	-40.1001	-101.929	-40.0696	-142.822	-40.1001	-85.4492	-40.1001	-97.0459	-40.0696	-115.967	-40.1001	-82.3975	-40.1001	-112.305	-40.1001	-123.291	-40.1001	-117.188	-40.1001	-137.329	-40.1306	-134.277	-40.1001	-108.032	-40.1001	-161.743	-40.1001
0.1805	-62.8662	-40.1001	-61.6455	-40.1611	-59.8145	-40.1001	-88.501	-40.1001	-83.6182	-40.1001	-115.356	-40.1001	-98.877	-40.1001	-136.719	-40.1001	-104.37	-40.1001	-114.746	-40.1001	-122.07	-40.1001	-97.0459	-40.1306	-111.694	-40.1001	-101.929	-40.0696	-109.863	-40.0696	-125.732	-40.1001	-128.784	-40.1306	-105.591	-40.0696	-153.198	-40.1001
0.181	-62.8662	-40.1306	-54.9316	-40.1001	-72.0215	-40.1001	-92.7734	-40.1001	-94.6045	-40.1001	-117.188	-40.1001	-102.539	-40.1306	-151.978	-40.1001	-103.76	-40.0696	-123.901	-40.1001	-117.798	-40.1001	-90.9424	-40.1001	-119.019	-40.0696	-119.629	-40.0696	-109.253	-40.0696	-128.784	-40.1001	-132.446	-40.1306	-115.356	-40.1001	-148.926	-40.1001
0.1815	-57.373	-40.1001	-42.1143	-40.0696	-63.4766	-40.1306	-108.032	-40.1001	-87.8906	-40.1001	-117.188	-40.1001	-90.9424	-40.1001	-118.408	-40.1001	-81.1768	-40.1001	-123.901	-40.1306	-112.915	-40.1001	-98.2666	-40.1306	-98.877	-40.1001	-109.253	-40.1001	-115.356	-40.1001	-135.498	-40.1001	-125.732	-40.1001	-120.85	-40.1001	-169.678	-40.1306
0.182	-70.1904	-40.1001	-64.6973	-40.1001	-81.1768	-40.1306	-91.5527	-40.0696	-100.708	-40.1001	-124.512	-40.1001	-95.8252	-40.1001	-123.901	-40.1001	-76.9043	-40.1001	-103.149	-40.1001	-129.395	-40.1001	-84.2285	-40.1001	-102.539	-40.0696	-125.122	-40.1001	-117.798	-40.1001	-125.122	-40.1306	-123.901	-40.1306	-123.901	-40.1306	-169.678	-40.1306
0.1825	-58.5938	-40.1001	-65.918	-40.0696	-65.3076	-40.0696	-89.7217	-40.1306	-95.8252	-40.1001	-104.98	-40.1001	-108.643	-40.1001	-139.771	-40.1001	-87.8906	-40.1306	-121.46	-40.1001	-112.915	-40.1001	-88.501	-40.1001	-100.708	-40.1001	-109.253	-40.1001	-112.915	-40.0696	-121.46	-40.1001	-126.343	-40.1001	-100.098	-40.1001	-154.419	-40.1001
0.183	-52.4902	-40.1001	-62.8662	-40.1306	-76.2939	-40.0696	-92.1631	-40.1306	-92.1631	-40.1001	-97.0459	-40.0696	-94.6045	-40.1001	-133.057	-40.1001	-93.9941	-40.1306	-111.084	-40.1306	-107.422	-40.1001	-81.7871	-40.1001	-118.408	-40.1306	-113.525	-40.0696	-114.746	-40.0696	-117.188	-40.0696	-122.681	-40.1001	-116.577	-40.0696	-162.964	-40.1001
0.1835	-72.6318	-40.1001	-66.5283	-40.1001	-68.9697	-40.1306	-85.4492	-40.1001	-95.2148	-40.1001	-83.6182	-40.1001	-86.0596	-40.1001	-137.329	-40.1001	-92.1631	-40.1001	-115.967	-40.1001	-111.694	-40.1306	-93.3838	-40.1001	-111.694	-40.1001	-111.694	-40.0696	-102.539	-40.1306	-116.577	-40.1001	-116.577	-40.0696	-115.967	-40.0696	-184.326	-40.1001
0.184	-62.2559	-40.1306	-54.3213	-40.0696	-75.6836	-40.1306	-87.2803	-40.1001	-103.76	-40.1001	-96.4355	-40.1001	-108.643	-40.1001	-137.329	-40.1001	-68.3594	-40.0696	-109.863	-40.1001	-125.122	-40.1001	-98.2666	-40.1001	-125.732	-40.1001	-142.212	-40.1001	-110.474	-40.1001	-111.084	-40.1001	-138.55	-40.1001	-117.798	-40.1001	-167.847	-40.0391
0.1845	-61.0352	-40.1306	-65.918	-40.1001	-78.7354	-40.1001	-86.6699	-40.0696	-99.4873	-40.0696	-104.98	-40.0696	-108.032	-40.1001	-140.991	-40.1001	-83.0078	-40.1001	-111.694	-40.1001	-112.915	-40.1001	-85.4492	-40.1001	-121.46	-40.1001	-125.732	-40.1001	-98.2666	-40.0696	-115.967	-40.1001	-125.732	-40.1001	-124.512	-40.1001	-164.185	-40.1001
0.185	-70.8008	-40.1306	-56.1523	-40.1001	-72.0215	-40.1001	-84.2285	-40.1001	-102.539	-40.1001	-105.591	-40.1001	-104.98	-40.1001	-140.991	-40.0696	-86.0596	-40.1306	-92.1631	-40.1001	-108.643	-40.1001	-89.7217	-40.1306	-114.136	-40.1001	-121.46	-40.0696	-113.525	-40.1001	-122.07	-40.1001	-126.343	-40.1001	-113.525	-40.1001	-172.119	-40.1306
0.1855	-63.4766	-40.1001	-51.8799	-40.1306	-70.8008	-40.1306	-91.5527	-40.1001	-107.422	-40.1306	-109.253	-40.1306	-94.6045	-40.1001	-136.719	-40.0696	-81.7871	-40.1001	-115.356	-40.1306	-106.812	-40.1306	-86.6699	-40.0696	-123.901	-40.1001	-139.16	-40.1001	-97.0459	-40.1001	-115.356	-40.1001	-114.136	-40.1001	-112.915	-40.1306	-162.964	-40.1001
0.186	-67.1387	-40.1001	-53.7109	-40.1001	-69.5801	-40.1001	-100.708	-40.1001	-121.46	-40.1001	-103.76	-40.1001	-87.8906	-40.1001	-136.108	-40.1001	-100.098	-40.1001	-102.539	-40.1001	-99.4873	-40.1001	-81.7871	-40.1001	-132.446	-40.1001	-145.874	-40.1001	-105.591	-40.1001	-123.901	-40.0696	-124.512	-40.1001	-105.591	-40.1001	-172.119	-40.1306
0.1865	-76.2939	-40.1001	-58.5938	-40.1001	-79.9561	-40.1001	-75.6836	-40.1306	-122.681	-40.1001	-92.7734	-40.1001	-97.0459	-40.1001	-134.277	-40.1001	-83.6182	-40.1001	-98.877	-40.0696	-101.929	-40.1001	-93.3838	-40.1306	-113.525	-40.1001	-114.746	-40.0696	-98.2666	-40.1001	-108.032	-40.1001	-136.719	-40.0696	-108.032	-40.1001	-145.264	-40.1306
0.187	-75.0732	-40.1306	-65.918	-40.1001	-76.2939	-40.1001	-83.0078	-40.1001	-136.108	-40.1001	-109.253	-40.1306	-92.1631	-40.1001	-143.433	-40.0696	-76.2939	-40.1001	-112.305	-40.1001	-117.188	-40.1001	-90.332	-40.1001	-126.343	-40.1001	-134.277	-40.0696	-125.732	-40.1001	-111.084	-40.1001	-125.732	-40.1001	-106.201	-40.1001	-150.757	-40.0696
0.1875	-65.918	-40.1001	-62.2559	-40.1001	-63.4766	-40.1001	-73.8525	-40.1001	-128.784	-40.1001	-102.539	-40.1001	-94.6045	-40.1001	-131.836	-40.1001	-86.6699	-40.1306	-108.032	-40.1306	-127.563	-40.1306	-112.915	-40.0696	-113.525	-40.1001	-118.408	-40.1001	-118.408	-40.1001	-126.343	-40.1001	-130.615	-40.1001	-100.708	-40.1306	-150.757	-40.1001
0.188	-67.1387	-40.1001	-56.7627	-40.1001	-56.1523	-40.1001	-89.1113	-40.0696	-110.474	-40.1001	-87.8906	-40.1001	-100.098	-40.1001	-150.757	-40.1306	-85.4492	-40.1001	-105.591	-40.1001	-120.85	-40.0696	-100.708	-40.1306	-109.253	-40.0696	-108.643	-40.1001	-127.563	-40.0696	-115.967	-40.0696	-134.888	-40.1001	-102.539	-40.0696	-151.978	-40.1001
0.1885	-68.3594	-40.1001	-68.3594	-40.1001	-65.918	-40.0696	-84.8389	-40.0696	-104.98	-40.0696	-85.4492	-40.1306	-104.98	-40.1306	-147.705	-40.1001	-69.5801	-40.1001	-93.9941	-40.1001	-108.032	-40.1001	-97.6563	-40.1001	-115.967	-40.1001	-109.863	-40.0696	-113.525	-40.1001	-122.07	-40.0696	-133.667	-40.0696	-114.136	-40.1306	-169.678	-40.0696
0.189	-64.0869	-40.1001	-43.9453	-40.1001	-73.8525	-40.1001	-90.332	-40.1001	-106.812	-40.1001	-77.5146	-40.1001	-112.305	-40.1001	-131.226	-40.1001	-92.7734	-40.0696	-103.149	-40.1001	-103.149	-40.1001	-96.4355	-40.1306	-114.746	-40.1001	-122.07	-40.1001	-124.512	-40.1001	-130.005	-40.1001	-137.939	-40.0696	-110.474	-40.1001	-156.86	-40.1306
0.1895	-64.0869	-40.1001	-66.5283	-40.1001	-62.8662	-40.1001	-92.1631	-40.1001	-97.0459	-40.0696	-93.3838	-40.1001	-115.967	-40.0696	-120.239	-40.1001	-89.1113	-40.1001	-114.136	-40.1001	-109.253	-40.1306	-101.318	-40.1001	-128.174	-40.1001	-128.174	-40.1001	-117.798	-40.1001	-126.953	-40.1001	-135.498	-40.1001	-111.084	-40.1001	-162.964	-40.0696
0.19	-83.6182	-40.0696	-68.3594	-40.1001	-86.0596	-40.1001	-89.7217	-40.1001	-99.4873	-40.1001	-92.7734	-40.1001	-102.539	-40.1001	-133.667	-40.0696	-79.9561	-40.1001	-84.2285	-40.1001	-103.149	-40.1001	-104.98	-40.1001	-115.967	-40.1001	-144.653	-40.1001	-113.525	-40.1001	-122.681	-40.1306	-136.719	-40.1001	-111.084	-40.1001	-144.043	-40.1001
0.1905	-75.6836	-40.0696	-76.9043	-40.1001	-63.4766	-40.0696	-87.2803	-40.1306	-111.694	-40.1001	-100.098	-40.0696	-107.422	-40.0696	-139.16	-40.1001	-92.7734	-40.0696	-100.098	-40.1001	-115.356	-40.1001	-91.5527	-40.0696	-131.836	-40.1001	-153.198	-40.1001	-111.084	-40.1001	-116.577	-40.1001	-137.329	-40.1001	-101.318	-40.1001	-167.236	-40.1001
0.191	-84.8389	-40.1001	-59.8145	-40.1001	-61.6455	-40.1001	-81.1768	-40.1001	-96.4355	-40.1001	-97.6563	-40.1001	-85.4492	-40.1001	-137.329	-40.1306	-82.3975	-40.1001	-85.4492	-40.1306	-111.694	-40.1001	-89.1113	-40.1001	-123.291	-40.1001	-144.043	-40.1306	-126.953	-40.1001	-133.667	-40.1001	-142.822	-40.1001	-117.798	-40.1001	-159.912	-40.1001
0.1915	-89.1113	-40.1001	-76.2939	-40.1001	-70.8008	-40.1001	-83.0078	-40.0696	-101.318	-40.1001	-78.7354	-40.1001	-80.5664	-40.1001	-134.277	-40.1001	-92.1631	-40.1001	-90.332	-40.1001	-105.591	-40.1001	-97.0459	-40.0696	-112.305	-40.1001	-145.264	-40.1001	-130.615	-40.1001	-131.226	-40.1306	-145.264	-40.1001	-115.967	-40.0696	-147.095	-40.1001
0.192	-90.9424	-40.1306	-86.0596	-40.1001	-65.918	-40.1001	-69.5801	-40.0696	-106.812	-40.1001	-98.877	-40.1306	-111.694	-40.1001	-156.86	-40.1001	-93.9941	-40.1001	-93.3838	-40.1306	-116.577	-40.1306	-98.877	-40.1001	-125.122	-40.0696	-130.005	-40.0696	-118.408	-40.0391	-125.732	-40.0696	-144.653	-40.1001	-102.539	-40.1306	-159.912	-40.1001
0.1925	-86.6699	-40.1306	-77.5146	-40.1001	-87.8906	-40.1001	-69.5801	-40.1001	-104.98	-40.1001	-88.501	-40.1001	-107.422	-40.1001	-122.07	-40.1001	-97.0459	-40.1001	-111.694	-40.1306	-108.032	-40.1001	-92.1631	-40.1001	-121.46	-40.0696	-123.901	-40.1001	-130.005	-40.1001	-134.277	-40.1001	-146.484	-40.0696	-112.915	-40.1306	-169.678	-40.1001
0.193	-78.7354	-40.1001	-69.5801	-40.1001	-89.1113	-40.1001	-100.098	-40.1001	-92.7734	-40.1001	-83.0078	-40.1001	-104.98	-40.1001	-116.577	-40.1001	-90.9424	-40.1001	-95.2148	-40.1001	-117.798	-40.0696	-81.7871	-40.1306	-116.577	-40.1001	-128.784	-40.1001	-108.032	-40.0696	-144.653	-40.1001	-141.602	-40.1001	-108.032	-40.1306	-161.133	-40.1001
0.1935	-78.125	-40.1001	-72.0215	-40.1001	-76.2939	-40.1001	-78.7354	-40.1001	-97.6563	-40.1001	-75.6836	-40.1001	-92.1631	-40.1001	-135.498	-40.1001	-93.3838	-40.0696	-100.098	-40.1001	-108.643	-40.1001	-98.2666	-40.1001	-109.863	-40.0696	-125.122	-40.1001	-112.305	-40.0696	-126.343	-40.1001	-170.288	-40.1001	-106.812	-40.1001	-157.471	-40.1001
0.194	-68.9697	-40.1001	-74.4629	-40.0696	-75.0732	-40.1001	-81.7871	-40.1001	-101.318	-40.1001	-82.3975	-40.0696	-93.3838	-40.1001	-134.277	-40.1306	-81.7871	-40.1001	-112.305	-40.1001	-106.812	-40.1306	-95.2148	-40.0696	-103.76	-40.0696	-126.953	-40.1306	-108.643	-40.0696	-131.836	-40.1001	-156.25	-40.1306	-108.643	-40.1001	-149.536	-40.1306
0.1945	-72.0215	-40.1001	-62.2559	-40.1306	-84.2285	-40.1306	-95.8252	-40.1001	-79.3457	-40.1001	-85.4492	-40.1001	-84.2285	-40.1001	-116.577	-40.1001	-87.8906	-40.1306	-111.084	-40.1001	-123.291	-40.1001	-92.1631	-40.1001	-113.525	-40.1306	-134.888	-40.1001	-123.901	-40.1001	-119.629	-40.1001	-158.691	-40.1001	-106.812	-40.1001	-144.653	-40.0696
0.195	-76.2939	-40.1001	-67.1387	-40.1001	-75.6836	-40.1001	-89.7217	-40.0696	-89.1113	-40.0696	-92.1631	-40.1001	-95.2148	-40.1001	-101.929	-40.1001	-104.98	-40.1001	-95.2148	-40.1001	-122.681	-40.1001	-90.9424	-40.1306	-123.901	-40.0696	-128.784	-40.1001	-112.305	-40.1001	-143.433	-40.1306	-147.095	-40.0696	-117.798	-40.1001	-155.029	-40.1001
0.1955	-66.5283	-40.1001	-61.6455	-40.1001	-83.6182	-40.1306	-83.6182	-40.1001	-95.8252	-40.1001	-84.2285	-40.1001	-84.2285	-40.1306	-108.643	-40.1001	-81.7871	-40.0696	-104.98	-40.0696	-96.4355	-40.1306	-104.37	-40.1001	-103.149	-40.1001	-130.615	-40.1001	-104.98	-40.1001	-128.174	-40.1001	-166.626	-40.1001	-119.019	-40.1001	-152.588	-40.1001
0.196	-65.918	-40.1001	-66.5283	-40.0696	-78.125	-40.1001	-97.0459	-40.1001	-93.9941	-40.1001	-84.8389	-40.1001	-83.0078	-40.1001	-140.991	-40.1001	-103.76	-40.1001	-98.877	-40.1001	-100.098	-40.1001	-97.0459	-40.1001	-106.812	-40.1001	-108.643	-40.0696	-106.201	-40.0696	-136.719	-40.1001	-157.471	-40.1001	-111.084	-40.0696	-156.25	-40.1001
0.1965	-71.4111	-40.1306	-69.5801	-40.1306	-73.8525	-40.1001	-92.1631	-40.0696	-100.708	-40.1001	-81.7871	-40.1001	-89.1113	-40.1306	-132.446	-40.0696	-95.8252	-40.1001	-102.539	-40.1001	-115.356	-40.1001	-87.8906	-40.1001	-104.37	-40.1306	-102.539	-40.0696	-103.76	-40.1306	-155.64	-40.0696	-162.354	-40.1001	-122.07	-40.1001	-145.874	-40.1001
0.197	-70.8008	-40.0696	-66.5283	-40.1306	-93.9941	-40.1001	-84.8389	-40.1001	-103.149	-40.1001	-78.7354	-40.1001	-95.8252	-40.0391	-114.746	-40.0696	-96.4355	-40.1001	-98.877	-40.1306	-90.9424	-40.1001	-78.7354	-40.1001	-101.318	-40.1001	-124.512	-40.1001	-104.98	-40.1306	-146.484	-40.0696	-151.978	-40.1001	-105.591	-40.1001	-142.822	-40.1001
0.1975	-86.0596	-40.1001	-73.2422	-40.0696	-91.5527	-40.1306	-88.501	-40.1001	-102.539	-40.1306	-79.3457	-40.1306	-85.4492	-40.1306	-110.474	-40.1001	-97.6563	-40.1001	-103.76	-40.1001	-117.188	-40.1001	-96.4355	-40.1001	-133.667	-40.0696	-131.836	-40.1001	-114.746	-40.1001	-137.939	-40.1001	-161.743	-40.1306	-126.953	-40.1001	-151.367	-40.1001
0.198	-70.1904	-40.0696	-65.3076	-40.1001	-93.9941	-40.1001	-90.332	-40.1001	-94.6045	-40.1001	-85.4492	-40.1001	-92.1631	-40.1001	-105.591	-40.0696	-98.877	-40.1001	-125.122	-40.1001	-123.291	-40.1001	-91.5527	-40.1001	-112.915	-40.1001	-126.343	-40.0696	-105.591	-40.1306	-134.888	-40.0696	-160.522	-40.1001	-111.084	-40.1001	-136.719	-40.1001
0.1985	-63.4766	-40.1001	-69.5801	-40.1001	-80.5664	-40.1001	-106.812	-40.1001	-86.6699	-40.1001	-104.37	-40.1001	-90.9424	-40.1001	-100.098	-40.1306	-98.2666	-40.1001	-114.136	-40.0696	-111.694	-40.1306	-94.6045	-40.0696	-110.474	-40.0696	-118.408	-40.1001	-104.37	-40.1001	-110.474	-40.0696	-166.626	-40.1001	-99.4873	-40.0696	-145.264	-40.1001
0.199	-62.8662	-40.1001	-54.9316	-40.1306	-89.1113	-40.1001	-101.318	-40.1001	-102.539	-40.1001	-89.7217	-40.1001	-101.929	-40.1001	-103.76	-40.1306	-72.6318	-40.0696	-114.136	-40.1001	-109.863	-40.1001	-92.1631	-40.1001	-115.356	-40.1001	-128.784	-40.1306	-104.37	-40.1001	-139.771	-40.0696	-168.457	-40.1001	-106.812	-40.0696	-157.471	-40.1001
0.1995	-72.0215	-40.1001	-54.3213	-40.1306	-73.8525	-40.1001	-90.332	-40.0696	-93.9941	-40.1001	-93.3838	-40.1001	-104.98	-40.1001	-86.6699	-40.1001	-73.2422	-40.1001	-112.915	-40.1001	-113.525	-40.0696	-97.0459	-40.1001	-114.136	-40.1001	-129.395	-40.1306	-111.084	-40.1001	-105.591	-40.0696	-142.212	-40.1001	-108.643	-40.1001	-147.095	-40.1001
0.2	-66.5283	-40.1001	-71.4111	-40.0696	-74.4629	-40.1306	-97.6563	-40.1001	-97.6563	-40.1001	-86.6699	-40.1001	-105.591	-40.1306	-108.643	-40.1001	-75.0732	-40.1001	-123.291	-40.1001	-123.901	-40.1001	-92.7734	-40.0696	-103.76	-40.1001	-109.253	-40.1001	-99.4873	-40.1001	-113.525	-40.0696	-150.146	-40.1001	-107.422	-40.1001	-146.484	-40.0696
0.2005	-59.2041	-40.1001	-73.2422	-40.0696	-73.2422	-40.1001	-103.149	-40.1001	-91.5527	-40.0696	-93.9941	-40.1001	-99.4873	-40.1306	-118.408	-40.1001	-83.0078	-40.1306	-115.356	-40.1306	-122.681	-40.1001	-101.929	-40.0696	-103.149	-40.1001	-106.812	-40.1001	-99.4873	-40.1001	-112.915	-40.0696	-154.419	-40.1001	-97.0459	-40.1001	-151.978	-40.1001
0.201	-45.7764	-40.1001	-62.8662	-40.0696	-86.6699	-40.0696	-95.2148	-40.1001	-89.1113	-40.1001	-99.4873	-40.1306	-95.2148	-40.1306	-105.591	-40.0696	-81.1768	-40.0696	-126.343	-40.1001	-118.408	-40.1001	-100.098	-40.0696	-112.305	-40.0696	-115.967	-40.1001	-106.201	-40.0696	-120.239	-40.1001	-143.433	-40.1306	-109.253	-40.1001	-144.653	-40.1001
0.2015	-70.8008	-40.1001	-65.3076	-40.1306	-82.3975	-40.1001	-106.812	-40.1001	-97.0459	-40.1611	-95.2148	-40.1001	-94.6045	-40.1001	-109.253	-40.0696	-71.4111	-40.1001	-112.915	-40.1001	-120.85	-40.1001	-78.7354	-40.1001	-101.929	-40.1001	-133.057	-40.1001	-87.2803	-40.1306	-108.643	-40.0696	-129.395	-40.0696	-122.681	-40.1306	-142.822	-40.1001
0.202	-76.2939	-40.0696	-59.2041	-40.1306	-79.9561	-40.1001	-90.332	-40.1001	-108.032	-40.1306	-101.318	-40.1001	-113.525	-40.1001	-106.812	-40.1001	-72.6318	-40.0696	-104.98	-40.1001	-117.798	-40.1306	-91.5527	-40.1306	-97.0459	-40.1001	-100.098	-40.1001	-103.76	-40.1001	-120.85	-40.1001	-131.836	-40.0696	-114.136	-40.1001	-146.484	-40.1306
0.2025	-61.0352	-40.1001	-67.749	-40.1001	-75.0732	-40.1306	-114.746	-40.1306	-109.863	-40.1001	-103.76	-40.1001	-112.305	-40.1001	-119.019	-40.1001	-72.0215	-40.1001	-115.967	-40.1001	-114.136	-40.1306	-99.4873	-40.1001	-79.3457	-40.1001	-106.812	-40.1001	-109.253	-40.1001	-134.277	-40.1001	-138.55	-40.1001	-106.201	-40.1001	-139.771	-40.1306
0.203	-65.918	-40.1306	-78.125	-40.1001	-73.2422	-40.0696	-89.7217	-40.1306	-98.877	-40.1001	-100.708	-40.1001	-109.863	-40.1001	-128.174	-40.1001	-76.9043	-40.1001	-119.629	-40.1001	-110.474	-40.1001	-96.4355	-40.1001	-84.8389	-40.1001	-116.577	-40.1306	-95.8252	-40.1306	-121.46	-40.0696	-148.926	-40.0696	-111.084	-40.0696	-144.653	-40.1001
0.2035	-86.0596	-40.0696	-71.4111	-40.1001	-81.1768	-40.1001	-74.4629	-40.1306	-115.356	-40.1001	-104.98	-40.1001	-106.201	-40.1001	-98.877	-40.1306	-70.8008	-40.1001	-112.915	-40.1001	-128.784	-40.1306	-92.7734	-40.1306	-112.915	-40.0696	-123.291	-40.0696	-104.37	-40.1001	-123.901	-40.1001	-160.522	-40.0696	-110.474	-40.1001	-142.822	-40.0696
0.204	-65.918	-40.1001	-60.4248	-40.1001	-83.6182	-40.1001	-89.7217	-40.1001	-111.694	-40.1001	-88.501	-40.1306	-106.812	-40.1001	-82.3975	-40.1001	-85.4492	-40.1001	-103.76	-40.1001	-121.46	-40.1001	-98.2666	-40.1001	-97.0459	-40.0696	-112.305	-40.1001	-100.098	-40.1001	-116.577	-40.1306	-160.522	-40.1306	-114.746	-40.1001	-151.367	-40.1001
0.2045	-67.749	-40.1306	-53.1006	-40.1001	-93.3838	-40.0696	-83.0078	-40.1001	-93.9941	-40.1001	-111.694	-40.1001	-102.539	-40.1001	-128.174	-40.1001	-73.2422	-40.1001	-112.915	-40.1001	-122.681	-40.1001	-90.332	-40.1001	-94.6045	-40.1001	-117.798	-40.1001	-111.084	-40.0696	-130.005	-40.0696	-157.471	-40.1001	-99.4873	-40.1001	-161.743	-40.1001
0.205	-84.8389	-40.1306	-53.1006	-40.1306	-68.3594	-40.1001	-84.8389	-40.0696	-121.46	-40.1306	-99.4873	-40.0696	-115.967	-40.0696	-119.019	-40.1306	-83.6182	-40.1001	-108.643	-40.0696	-126.953	-40.1001	-91.5527	-40.1001	-104.37	-40.1306	-111.694	-40.0696	-101.318	-40.1001	-129.395	-40.1001	-153.198	-40.1001	-113.525	-40.1001	-153.198	-40.1306
0.2055	-72.6318	-40.1001	-65.3076	-40.1001	-83.6182	-40.1306	-91.5527	-40.1306	-100.708	-40.0696	-111.084	-40.1001	-118.408	-40.1001	-107.422	-40.1001	-72.6318	-40.0696	-122.07	-40.1001	-115.967	-40.1306	-93.9941	-40.1306	-96.4355	-40.1001	-113.525	-40.1001	-109.253	-40.1001	-129.395	-40.1001	-141.602	-40.0696	-103.76	-40.1001	-147.705	-40.1001
0.206	-73.2422	-40.1001	-69.5801	-40.1001	-73.8525	-40.1001	-95.8252	-40.1306	-103.76	-40.1306	-106.201	-40.1001	-112.915	-40.1306	-114.136	-40.1001	-80.5664	-40.0696	-98.2666	-40.1001	-120.239	-40.1306	-101.318	-40.1001	-108.643	-40.1001	-119.019	-40.1001	-115.967	-40.0696	-122.681	-40.1001	-145.874	-40.1001	-115.967	-40.1001	-145.874	-40.1001
0.2065	-73.8525	-40.1001	-66.5283	-40.0696	-72.0215	-40.1001	-92.7734	-40.1001	-107.422	-40.1001	-98.2666	-40.1001	-100.098	-40.0696	-133.057	-40.1001	-86.0596	-40.1001	-109.253	-40.1306	-123.291	-40.1001	-93.9941	-40.0696	-101.318	-40.1001	-106.812	-40.1001	-108.032	-40.1001	-117.798	-40.1001	-146.484	-40.1001	-115.356	-40.1001	-148.926	-40.1001
0.207	-67.1387	-40.1001	-57.9834	-40.1001	-59.8145	-40.1001	-83.0078	-40.0696	-112.915	-40.1001	-104.37	-40.1001	-107.422	-40.1001	-118.408	-40.1001	-90.332	-40.1001	-97.0459	-40.1001	-117.798	-40.1001	-94.6045	-40.1001	-98.2666	-40.1001	-92.1631	-40.1001	-122.681	-40.1001	-108.032	-40.1306	-146.484	-40.0696	-128.174	-40.1001	-143.433	-40.1001
0.2075	-64.6973	-40.1306	-67.1387	-40.1001	-76.2939	-40.1001	-83.6182	-40.1306	-89.1113	-40.0696	-112.915	-40.1001	-96.4355	-40.1001	-112.305	-40.1306	-79.3457	-40.1001	-94.6045	-40.1001	-134.277	-40.1001	-104.98	-40.1001	-112.305	-40.1001	-127.563	-40.1001	-111.694	-40.1001	-112.305	-40.1001	-137.939	-40.1306	-123.901	-40.0696	-152.588	-40.1001
0.208	-77.5146	-40.1001	-70.8008	-40.1001	-74.4629	-40.1001	-91.5527	-40.0696	-75.6836	-40.0696	-98.877	-40.1001	-108.032	-40.1001	-106.812	-40.1001	-83.0078	-40.1001	-95.2148	-40.1306	-143.433	-40.1001	-112.915	-40.1001	-102.539	-40.1001	-125.122	-40.0696	-126.953	-40.1001	-117.798	-40.1001	-136.719	-40.1001	-106.201	-40.0696	-158.081	-40.1001
0.2085	-76.2939	-40.1001	-66.5283	-40.1306	-70.1904	-40.1306	-70.8008	-40.0696	-80.5664	-40.1001	-103.76	-40.1001	-98.877	-40.1001	-130.005	-40.1001	-89.7217	-40.1001	-89.1113	-40.1306	-128.784	-40.1001	-92.7734	-40.1001	-102.539	-40.1001	-129.395	-40.1001	-115.356	-40.0696	-111.694	-40.1001	-138.55	-40.1001	-108.032	-40.1306	-145.264	-40.1001
0.209	-75.0732	-40.1306	-69.5801	-40.1001	-62.2559	-40.0696	-87.8906	-40.1306	-92.1631	-40.1306	-103.149	-40.1306	-94.6045	-40.1001	-123.291	-40.1001	-82.3975	-40.0696	-102.539	-40.1001	-109.863	-40.1001	-101.318	-40.1306	-93.9941	-40.0696	-119.629	-40.1001	-111.694	-40.1001	-112.915	-40.1001	-137.329	-40.1306	-122.681	-40.1306	-145.874	-40.1001
0.2095	-81.1768	-40.1001	-71.4111	-40.1001	-72.0215	-40.1001	-84.2285	-40.1001	-77.5146	-40.1001	-97.0459	-40.1001	-108.643	-40.1001	-111.694	-40.0696	-70.8008	-40.1306	-89.7217	-40.1001	-130.615	-40.1001	-93.9941	-40.1001	-105.591	-40.1001	-130.615	-40.1001	-112.915	-40.1001	-118.408	-40.0696	-150.757	-40.1001	-118.408	-40.0696	-142.822	-40.1001
0.21	-71.4111	-40.1001	-82.3975	-40.1001	-73.2422	-40.1306	-87.2803	-40.1001	-92.1631	-40.1001	-86.0596	-40.1001	-106.201	-40.1001	-111.694	-40.0696	-92.7734	-40.1001	-110.474	-40.0696	-131.226	-40.1001	-113.525	-40.1001	-100.098	-40.1001	-137.939	-40.1306	-126.343	-40.1306	-139.16	-40.1001	-128.784	-40.1001	-124.512	-40.1001	-150.146	-40.1001
0.2105	-76.9043	-40.1001	-68.9697	-40.1001	-97.0459	-40.1306	-92.7734	-40.1306	-89.1113	-40.1001	-98.877	-40.1306	-100.708	-40.1001	-103.149	-40.1001	-98.877	-40.1001	-84.2285	-40.1001	-117.798	-40.1001	-92.7734	-40.1001	-109.863	-40.1001	-122.07	-40.1306	-101.318	-40.1001	-130.005	-40.1001	-132.446	-40.0696	-117.798	-40.0696	-133.667	-40.1001
0.211	-76.9043	-40.1306	-56.7627	-40.1001	-87.2803	-40.1001	-87.8906	-40.1001	-108.032	-40.1001	-95.8252	-40.0696	-104.98	-40.1306	-91.5527	-40.1306	-87.2803	-40.1306	-85.4492	-40.1001	-120.239	-40.1001	-91.5527	-40.1001	-109.253	-40.1001	-122.07	-40.1001	-114.746	-40.1001	-105.591	-40.1001	-158.691	-40.1001	-117.798	-40.1001	-130.615	-40.0696
0.2115	-90.9424	-40.1306	-64.0869	-40.1001	-70.8008	-40.1001	-100.098	-40.1001	-79.9561	-40.0696	-104.37	-40.0696	-98.877	-40.1001	-112.305	-40.1001	-103.149	-40.1306	-102.539	-40.1001	-114.746	-40.1001	-83.6182	-40.1001	-117.798	-40.1306	-119.629	-40.1001	-106.201	-40.1001	-111.694	-40.1001	-145.264	-40.1001	-117.188	-40.0696	-130.005	-40.1001
0.212	-73.8525	-40.1001	-72.0215	-40.1306	-83.0078	-40.1001	-93.3838	-40.0696	-87.8906	-40.1001	-105.591	-40.1306	-93.3838	-40.1001	-98.2666	-40.1001	-103.149	-40.1306	-92.1631	-40.1001	-120.85	-40.1001	-87.8906	-40.1001	-116.577	-40.1001	-123.901	-40.0696	-104.37	-40.1001	-117.188	-40.0696	-148.926	-40.1001	-113.525	-40.1001	-138.55	-40.1001
0.2125	-70.1904	-40.1001	-75.6836	-40.1001	-79.9561	-40.1001	-95.8252	-40.1001	-83.0078	-40.1001	-109.863	-40.1001	-103.76	-40.1001	-115.356	-40.1001	-117.188	-40.1001	-92.1631	-40.1001	-120.85	-40.0696	-105.591	-40.1001	-103.76	-40.1306	-138.55	-40.1001	-112.305	-40.0696	-128.174	-40.0696	-141.602	-40.1001	-126.953	-40.1001	-145.264	-40.0696
0.213	-68.3594	-40.1001	-63.4766	-40.1001	-77.5146	-40.1306	-81.1768	-40.1001	-81.7871	-40.1001	-81.1768	-40.1001	-100.098	-40.1001	-115.356	-40.1001	-92.7734	-40.1001	-86.0596	-40.1001	-104.37	-40.1001	-97.0459	-40.1306	-94.6045	-40.1001	-117.798	-40.1001	-119.629	-40.0696	-130.615	-40.1306	-130.615	-40.1001	-109.253	-40.1001	-144.043	-40.1001
0.2135	-81.7871	-40.0696	-69.5801	-40.0696	-64.6973	-40.1001	-80.5664	-40.1001	-86.6699	-40.1001	-97.0459	-40.1306	-92.1631	-40.1001	-104.98	-40.1001	-97.6563	-40.1001	-104.98	-40.1001	-117.798	-40.1001	-98.877	-40.1001	-113.525	-40.1001	-147.705	-40.1001	-104.98	-40.1306	-123.291	-40.1001	-137.939	-40.1001	-120.85	-40.1001	-146.484	-40.1001
0.214	-66.5283	-40.1001	-64.0869	-40.0696	-73.2422	-40.1306	-83.6182	-40.1001	-76.9043	-40.1306	-87.2803	-40.1001	-87.8906	-40.1001	-104.37	-40.1306	-87.2803	-40.1001	-104.37	-40.0696	-111.084	-40.1306	-96.4355	-40.1306	-104.37	-40.1001	-149.536	-40.1001	-104.98	-40.1001	-122.07	-40.1001	-150.757	-40.1001	-125.122	-40.0696	-151.367	-40.1001
0.2145	-58.5938	-40.1001	-67.1387	-40.1306	-82.3975	-40.1001	-99.4873	-40.1306	-85.4492	-40.0391	-112.915	-40.1001	-87.8906	-40.1001	-101.929	-40.1001	-100.708	-40.1001	-89.7217	-40.1001	-112.915	-40.0696	-92.1631	-40.1001	-107.422	-40.1306	-134.277	-40.1001	-104.98	-40.1001	-106.201	-40.1001	-150.146	-40.1001	-118.408	-40.0696	-165.405	-40.1306
0.215	-62.2559	-40.1001	-69.5801	-40.1001	-81.7871	-40.1306	-92.7734	-40.1306	-94.6045	-40.1001	-91.5527	-40.1001	-89.7217	-40.1001	-103.149	-40.1001	-92.1631	-40.1001	-108.032	-40.1001	-117.188	-40.0696	-83.6182	-40.0696	-112.305	-40.0696	-120.85	-40.1001	-132.446	-40.1001	-126.343	-40.1306	-151.367	-40.1001	-126.343	-40.1001	-153.809	-40.1001
0.2155	-62.8662	-40.1306	-70.1904	-40.1306	-80.5664	-40.1001	-91.5527	-40.1001	-92.7734	-40.1001	-87.8906	-40.1001	-86.0596	-40.1001	-86.6699	-40.1001	-92.7734	-40.1306	-120.239	-40.1306	-113.525	-40.0696	-86.0596	-40.0696	-108.643	-40.1001	-127.563	-40.1306	-106.812	-40.1001	-109.863	-40.1001	-137.329	-40.1001	-121.46	-40.1001	-146.484	-40.0696
0.216	-60.4248	-40.1001	-78.7354	-40.1001	-76.2939	-40.1001	-83.6182	-40.1001	-103.149	-40.0696	-96.4355	-40.1001	-84.8389	-40.1001	-100.708	-40.1306	-83.6182	-40.1306	-115.356	-40.1001	-109.863	-40.1306	-81.7871	-40.1001	-100.708	-40.0696	-126.953	-40.1001	-110.474	-40.0696	-117.798	-40.0696	-145.264	-40.1001	-126.343	-40.1001	-153.198	-40.1001
0.2165	-76.2939	-40.1306	-75.6836	-40.1306	-87.2803	-40.1001	-98.877	-40.1001	-107.422	-40.0696	-80.5664	-40.1001	-102.539	-40.1001	-102.539	-40.0696	-93.3838	-40.0696	-114.746	-40.1001	-107.422	-40.0696	-90.332	-40.1306	-117.188	-40.1001	-138.55	-40.0696	-104.98	-40.1306	-123.901	-40.1001	-149.536	-40.1001	-123.291	-40.1001	-161.133	-40.1001
0.217	-67.749	-40.1001	-70.8008	-40.1001	-92.1631	-40.1001	-92.1631	-40.0696	-95.8252	-40.1306	-90.9424	-40.1001	-83.6182	-40.0696	-101.318	-40.0696	-100.708	-40.1001	-104.98	-40.0696	-109.253	-40.1306	-91.5527	-40.1001	-108.032	-40.1001	-131.226	-40.1001	-114.746	-40.1306	-109.863	-40.1001	-153.809	-40.1001	-123.291	-40.0696	-166.626	-40.1001
0.2175	-70.1904	-40.1001	-82.3975	-40.1001	-81.1768	-40.1001	-101.318	-40.1306	-90.9424	-40.1001	-73.8525	-40.1001	-97.0459	-40.0696	-95.2148	-40.1001	-90.332	-40.1001	-102.539	-40.1306	-120.239	-40.1001	-95.2148	-40.0696	-106.201	-40.1001	-147.705	-40.0696	-122.681	-40.1001	-124.512	-40.1306	-142.212	-40.1001	-143.433	-40.1001	-142.822	-40.1001
0.218	-69.5801	-40.1001	-78.7354	-40.1001	-70.8008	-40.1001	-85.4492	-40.1306	-92.7734	-40.0696	-95.8252	-40.0696	-94.6045	-40.1001	-107.422	-40.1306	-93.3838	-40.1001	-118.408	-40.0696	-123.291	-40.1001	-93.3838	-40.1001	-113.525	-40.1001	-135.498	-40.0696	-106.812	-40.1001	-117.798	-40.1001	-149.536	-40.1001	-136.108	-40.0696	-137.939	-40.1306
0.2185	-67.1387	-40.1001	-74.4629	-40.1001	-78.7354	-40.1001	-86.0596	-40.1306	-95.2148	-40.1001	-96.4355	-40.0696	-106.812	-40.1001	-99.4873	-40.1001	-87.8906	-40.1306	-106.812	-40.1001	-130.615	-40.1306	-96.4355	-40.0696	-112.305	-40.1306	-123.901	-40.1306	-106.201	-40.1001	-124.512	-40.1306	-142.822	-40.0696	-126.953	-40.0696	-140.991	-40.1001
0.219	-62.8662	-40.1001	-73.2422	-40.0696	-73.8525	-40.1001	-85.4492	-40.1001	-111.084	-40.1001	-100.098	-40.1001	-90.332	-40.1001	-104.98	-40.1001	-84.2285	-40.0696	-94.6045	-40.1306	-128.784	-40.1001	-97.0459	-40.0696	-109.863	-40.1001	-135.498	-40.1001	-98.877	-40.1001	-139.771	-40.1001	-138.55	-40.0696	-123.291	-40.1001	-138.55	-40.1001
0.2195	-66.5283	-40.1001	-64.6973	-40.1001	-75.0732	-40.1001	-96.4355	-40.1001	-90.9424	-40.0696	-94.6045	-40.0696	-90.332	-40.1306	-101.929	-40.1001	-83.6182	-40.1306	-110.474	-40.1001	-119.019	-40.0696	-105.591	-40.1001	-107.422	-40.1001	-115.967	-40.1001	-98.877	-40.1001	-118.408	-40.1306	-136.108	-40.1001	-125.122	-40.1001	-136.108	-40.1001
0.22	-76.9043	-40.1306	-68.3594	-40.1001	-67.1387	-40.1001	-92.1631	-40.1001	-104.37	-40.1001	-126.953	-40.0696	-98.877	-40.1001	-92.1631	-40.0696	-84.8389	-40.1001	-93.9941	-40.1001	-125.732	-40.1001	-91.5527	-40.1001	-112.305	-40.1001	-114.136	-40.1001	-101.929	-40.0696	-109.253	-40.0696	-119.019	-40.1306	-117.798	-40.1001	-135.498	-40.1001
0.2205	-73.8525	-40.1001	-74.4629	-40.0696	-68.9697	-40.1001	-95.2148	-40.1001	-89.7217	-40.0696	-105.591	-40.1001	-84.8389	-40.1306	-120.85	-40.0696	-78.7354	-40.1001	-98.2666	-40.1001	-111.694	-40.1001	-114.136	-40.1001	-117.798	-40.1001	-106.812	-40.1001	-100.708	-40.1001	-127.563	-40.1001	-133.667	-40.1306	-111.084	-40.1306	-140.991	-40.0696
0.221	-71.4111	-40.0696	-59.2041	-40.1001	-65.918	-40.1001	-91.5527	-40.1306	-95.2148	-40.1001	-101.318	-40.1001	-94.6045	-40.1001	-119.629	-40.1306	-81.1768	-40.0696	-106.201	-40.1001	-123.291	-40.0696	-106.812	-40.1306	-108.643	-40.1001	-123.291	-40.1001	-104.98	-40.1001	-115.967	-40.1001	-130.615	-40.1001	-115.356	-40.1001	-139.16	-40.1001
0.2215	-51.8799	-40.0696	-75.0732	-40.1306	-63.4766	-40.1001	-96.4355	-40.1306	-96.4355	-40.1001	-104.98	-40.1306	-89.1113	-40.1001	-119.019	-40.1001	-77.5146	-40.0696	-115.356	-40.1001	-123.901	-40.1001	-107.422	-40.1001	-88.501	-40.1001	-106.201	-40.1306	-103.149	-40.0696	-127.563	-40.0696	-139.16	-40.1001	-128.784	-40.1306	-167.236	-40.1001
0.222	-74.4629	-40.1001	-57.9834	-40.1001	-61.0352	-40.1001	-79.3457	-40.1306	-92.7734	-40.1001	-96.4355	-40.1001	-96.4355	-40.1001	-106.201	-40.1001	-83.6182	-40.1001	-95.8252	-40.1001	-116.577	-40.1001	-109.253	-40.1001	-104.37	-40.1001	-124.512	-40.1306	-108.643	-40.1001	-114.746	-40.1001	-147.095	-40.1001	-112.305	-40.1306	-145.874	-40.1306
0.2225	-61.6455	-40.1001	-70.1904	-40.0696	-71.4111	-40.0696	-98.2666	-40.1001	-109.863	-40.1001	-109.863	-40.0696	-97.0459	-40.1306	-121.46	-40.1001	-103.76	-40.1001	-105.591	-40.1001	-108.643	-40.1001	-108.032	-40.1001	-97.0459	-40.0696	-125.122	-40.1001	-99.4873	-40.0696	-119.019	-40.1001	-144.653	-40.1611	-117.188	-40.1001	-125.732	-40.1001
0.223	-62.8662	-40.1306	-64.0869	-40.1306	-65.918	-40.1001	-90.9424	-40.1001	-115.967	-40.1001	-112.305	-40.1001	-85.4492	-40.1306	-117.188	-40.1306	-95.8252	-40.0696	-109.863	-40.1001	-112.305	-40.1001	-123.901	-40.1001	-105.591	-40.1001	-119.019	-40.1001	-93.3838	-40.1306	-122.07	-40.1001	-134.277	-40.1001	-133.057	-40.1001	-150.146	-40.1001
0.2235	-72.0215	-40.1001	-74.4629	-40.0696	-57.373	-40.1001	-84.2285	-40.1001	-114.746	-40.1001	-98.877	-40.0696	-104.37	-40.1001	-104.98	-40.1306	-79.9561	-40.1001	-102.539	-40.1001	-114.746	-40.1001	-98.877	-40.1001	-112.305	-40.1306	-135.498	-40.0391	-101.929	-40.1001	-115.967	-40.1001	-124.512	-40.0696	-131.226	-40.1001	-157.471	-40.1001
0.224	-71.4111	-40.1001	-56.7627	-40.0696	-60.4248	-40.1001	-82.3975	-40.0696	-95.8252	-40.1001	-103.76	-40.0696	-92.7734	-40.1001	-120.239	-40.1001	-90.332	-40.1001	-91.5527	-40.1001	-131.836	-40.1001	-108.643	-40.1001	-118.408	-40.1001	-129.395	-40.0696	-84.8389	-40.1001	-114.136	-40.1001	-135.498	-40.1306	-123.291	-40.1001	-144.043	-40.1001
0.2245	-73.8525	-40.1306	-42.7246	-40.1306	-54.9316	-40.1306	-88.501	-40.1001	-111.084	-40.1001	-124.512	-40.1001	-101.318	-40.1001	-104.37	-40.1001	-78.7354	-40.1306	-97.6563	-40.0696	-123.291	-40.1001	-104.37	-40.1306	-125.732	-40.0696	-142.212	-40.1306	-108.032	-40.1001	-131.836	-40.1001	-136.108	-40.1001	-115.356	-40.1306	-127.563	-40.1001
0.225	-59.2041	-40.1306	-59.8145	-40.0696	-70.8008	-40.1001	-90.332	-40.1306	-111.084	-40.1001	-107.422	-40.1001	-100.708	-40.1001	-100.098	-40.1306	-86.0596	-40.1001	-90.9424	-40.1001	-114.136	-40.1001	-105.591	-40.0696	-118.408	-40.1001	-134.888	-40.1001	-93.3838	-40.1001	-120.85	-40.1001	-130.615	-40.1001	-107.422	-40.1306	-144.653	-40.0696
0.2255	-64.0869	-40.1001	-70.8008	-40.1001	-62.2559	-40.1306	-80.5664	-40.0696	-104.37	-40.1001	-119.019	-40.1306	-93.9941	-40.0696	-92.1631	-40.1001	-83.0078	-40.1001	-104.98	-40.1001	-110.474	-40.1001	-107.422	-40.1001	-134.277	-40.1306	-130.005	-40.1001	-103.149	-40.1001	-109.253	-40.1001	-133.667	-40.1306	-114.746	-40.1001	-139.16	-40.1001
0.226	-66.5283	-40.1001	-70.1904	-40.1001	-75.0732	-40.1001	-76.2939	-40.1001	-96.4355	-40.1001	-110.474	-40.1306	-85.4492	-40.1001	-121.46	-40.1001	-81.1768	-40.1001	-93.3838	-40.1001	-103.76	-40.1001	-103.76	-40.1001	-128.174	-40.1306	-133.057	-40.1001	-115.967	-40.1001	-131.226	-40.1001	-132.446	-40.1001	-123.901	-40.1001	-143.433	-40.1001
0.2265	-77.5146	-40.1306	-54.3213	-40.0696	-68.9697	-40.1001	-79.9561	-40.1001	-100.098	-40.1001	-114.746	-40.1001	-86.6699	-40.1001	-123.291	-40.1001	-78.7354	-40.0696	-84.2285	-40.0696	-99.4873	-40.1306	-109.863	-40.1001	-122.681	-40.1001	-130.005	-40.0696	-108.643	-40.0696	-114.746	-40.1001	-156.25	-40.1001	-123.291	-40.1001	-136.108	-40.1001
0.227	-56.7627	-40.1001	-65.918	-40.1001	-76.2939	-40.0696	-93.3838	-40.1306	-89.1113	-40.1306	-102.539	-40.1306	-84.2285	-40.1001	-120.85	-40.1001	-91.5527	-40.1001	-84.2285	-40.0696	-104.98	-40.0696	-103.149	-40.1001	-124.512	-40.1001	-120.239	-40.1001	-111.694	-40.0696	-113.525	-40.0696	-144.653	-40.1001	-108.643	-40.1001	-121.46	-40.1001
0.2275	-66.5283	-40.1306	-77.5146	-40.1001	-69.5801	-40.1306	-94.6045	-40.1001	-91.5527	-40.1306	-93.3838	-40.1001	-91.5527	-40.1001	-115.356	-40.1001	-77.5146	-40.1001	-95.2148	-40.1001	-118.408	-40.1001	-98.877	-40.0696	-126.343	-40.1001	-121.46	-40.1001	-118.408	-40.1001	-101.929	-40.1306	-136.719	-40.1001	-109.863	-40.1306	-134.888	-40.1001
0.228	-69.5801	-40.1001	-68.9697	-40.0696	-66.5283	-40.0696	-85.4492	-40.1001	-100.098	-40.1001	-102.539	-40.0696	-101.318	-40.1001	-125.122	-40.1001	-83.6182	-40.1001	-81.1768	-40.1001	-101.929	-40.1001	-110.474	-40.1001	-133.667	-40.1001	-124.512	-40.1001	-93.3838	-40.1001	-115.967	-40.1001	-144.653	-40.1001	-106.201	-40.1306	-134.277	-40.1001
0.2285	-73.2422	-40.1001	-54.9316	-40.1001	-64.0869	-40.1306	-81.7871	-40.1001	-95.2148	-40.0696	-104.37	-40.0696	-93.9941	-40.1001	-119.019	-40.1001	-76.9043	-40.1001	-95.8252	-40.1001	-110.474	-40.0696	-102.539	-40.1001	-133.667	-40.1306	-128.174	-40.0696	-97.6563	-40.1001	-121.46	-40.1306	-139.16	-40.1001	-113.525	-40.1001	-151.978	-40.0696
0.229	-78.7354	-40.1306	-65.918	-40.1306	-62.2559	-40.1306	-93.3838	-40.1001	-100.098	-40.1001	-88.501	-40.1306	-92.7734	-40.1001	-98.877	-40.1001	-78.125	-40.1001	-93.3838	-40.1001	-118.408	-40.1001	-103.76	-40.1001	-125.732	-40.1001	-115.967	-40.1001	-105.591	-40.1001	-122.681	-40.1001	-131.836	-40.0696	-118.408	-40.1306	-135.498	-40.1001
0.2295	-76.2939	-40.1001	-62.2559	-40.1001	-72.0215	-40.1001	-97.0459	-40.1306	-98.2666	-40.1001	-86.6699	-40.1001	-115.356	-40.1001	-129.395	-40.0696	-71.4111	-40.0696	-101.929	-40.1001	-103.149	-40.1306	-102.539	-40.1001	-113.525	-40.0696	-139.16	-40.1001	-117.188	-40.1001	-109.863	-40.1001	-156.25	-40.1306	-115.356	-40.1001	-138.55	-40.1001
0.23	-78.125	-40.1001	-62.8662	-40.0696	-79.3457	-40.1306	-76.9043	-40.0696	-99.4873	-40.0696	-76.2939	-40.1306	-92.7734	-40.1001	-125.732	-40.1306	-79.3457	-40.1306	-104.37	-40.1001	-111.084	-40.1001	-109.253	-40.1001	-131.836	-40.1306	-130.615	-40.1001	-119.629	-40.1001	-121.46	-40.1001	-148.315	-40.1001	-121.46	-40.1001	-133.057	-40.1001
0.2305	-86.0596	-40.1001	-71.4111	-40.1001	-71.4111	-40.1306	-85.4492	-40.1306	-88.501	-40.1001	-86.0596	-40.1001	-108.643	-40.0696	-121.46	-40.1001	-87.8906	-40.1001	-100.098	-40.1001	-120.85	-40.0696	-101.929	-40.0696	-137.939	-40.1001	-148.315	-40.1001	-128.174	-40.0696	-112.915	-40.1306	-142.212	-40.1001	-126.953	-40.1001	-131.836	-40.1001
0.231	-80.5664	-40.1306	-73.8525	-40.1001	-66.5283	-40.0696	-83.0078	-40.1001	-105.591	-40.1001	-100.708	-40.0696	-93.3838	-40.1001	-98.877	-40.1001	-81.7871	-40.1306	-108.032	-40.0696	-115.967	-40.1306	-104.98	-40.0696	-128.784	-40.1001	-151.367	-40.1001	-135.498	-40.1001	-119.629	-40.1001	-134.888	-40.1001	-119.629	-40.1001	-123.901	-40.1001
0.2315	-92.1631	-40.1001	-69.5801	-40.1001	-87.8906	-40.0696	-87.8906	-40.0696	-108.643	-40.1001	-97.0459	-40.1001	-102.539	-40.0696	-110.474	-40.1001	-89.1113	-40.1001	-106.812	-40.1001	-100.708	-40.0696	-107.422	-40.1001	-125.732	-40.1611	-142.212	-40.0696	-122.07	-40.1001	-116.577	-40.1001	-141.602	-40.1001	-125.122	-40.0696	-124.512	-40.1001
0.232	-72.0215	-40.1001	-76.9043	-40.1001	-71.4111	-40.0696	-73.2422	-40.1001	-84.2285	-40.1001	-103.149	-40.1001	-91.5527	-40.1306	-114.746	-40.1001	-88.501	-40.1306	-101.929	-40.1001	-112.915	-40.1001	-90.9424	-40.1306	-119.629	-40.1001	-153.198	-40.1306	-125.122	-40.1001	-122.07	-40.1001	-141.602	-40.0696	-123.901	-40.1306	-134.888	-40.1001
0.2325	-73.2422	-40.1611	-88.501	-40.1001	-85.4492	-40.1001	-98.2666	-40.0696	-104.37	-40.1001	-97.6563	-40.1001	-88.501	-40.1001	-97.6563	-40.0696	-79.3457	-40.1001	-101.929	-40.1001	-104.98	-40.0696	-98.2666	-40.0696	-111.694	-40.1001	-128.784	-40.1001	-117.798	-40.1306	-117.798	-40.1001	-151.978	-40.1001	-133.667	-40.1001	-121.46	-40.1001
0.233	-78.7354	-40.1001	-64.6973	-40.1001	-83.6182	-40.0696	-98.2666	-40.1001	-106.201	-40.1001	-90.9424	-40.1001	-100.708	-40.1306	-104.37	-40.0696	-84.8389	-40.1306	-103.149	-40.1001	-111.694	-40.1001	-105.591	-40.1001	-107.422	-40.1001	-148.315	-40.1306	-116.577	-40.1001	-119.629	-40.1001	-139.771	-40.0696	-124.512	-40.1001	-126.953	-40.1306
0.2335	-82.3975	-40.1001	-65.3076	-40.1001	-69.5801	-40.0696	-84.8389	-40.1306	-104.37	-40.1001	-87.2803	-40.1001	-93.9941	-40.1001	-95.8252	-40.0696	-86.6699	-40.1001	-101.929	-40.0696	-117.188	-40.0696	-93.3838	-40.1306	-121.46	-40.1306	-149.536	-40.0696	-115.356	-40.1001	-106.201	-40.1306	-130.005	-40.1001	-119.019	-40.1001	-145.874	-40.1001
0.234	-73.8525	-40.1001	-69.5801	-40.1001	-72.0215	-40.0696	-98.877	-40.0696	-92.7734	-40.1001	-93.9941	-40.1001	-88.501	-40.1306	-104.98	-40.1001	-87.8906	-40.0696	-124.512	-40.1306	-123.291	-40.1001	-87.8906	-40.1001	-93.9941	-40.0696	-142.212	-40.1001	-100.098	-40.1306	-123.901	-40.0696	-149.536	-40.1001	-123.291	-40.1001	-149.536	-40.1001
0.2345	-69.5801	-40.1001	-73.2422	-40.0696	-75.0732	-40.1001	-103.149	-40.1306	-86.6699	-40.1001	-79.3457	-40.0696	-95.2148	-40.1001	-100.708	-40.1001	-100.098	-40.1001	-102.539	-40.1001	-119.019	-40.1306	-93.9941	-40.1001	-85.4492	-40.1001	-136.108	-40.1001	-103.76	-40.1001	-113.525	-40.1001	-144.653	-40.1306	-125.122	-40.0696	-127.563	-40.1001
0.235	-70.1904	-40.1001	-83.6182	-40.1001	-74.4629	-40.1001	-100.098	-40.1001	-103.76	-40.1001	-68.9697	-40.0696	-93.9941	-40.1001	-93.9941	-40.1001	-108.643	-40.1306	-118.408	-40.0696	-95.2148	-40.0696	-101.318	-40.1001	-106.812	-40.1001	-122.07	-40.1001	-118.408	-40.1611	-113.525	-40.1001	-144.043	-40.1001	-119.019	-40.1001	-156.86	-40.0696
0.2355	-62.8662	-40.1001	-70.1904	-40.1306	-71.4111	-40.1001	-98.877	-40.1306	-104.98	-40.1001	-85.4492	-40.1001	-95.8252	-40.1001	-119.019	-40.0696	-89.1113	-40.1001	-102.539	-40.1306	-96.4355	-40.0696	-99.4873	-40.1001	-111.084	-40.1001	-136.108	-40.1001	-111.694	-40.1306	-115.967	-40.1306	-143.433	-40.1001	-128.174	-40.1001	-155.029	-40.0696
0.236	-73.2422	-40.1001	-66.5283	-40.1001	-79.3457	-40.0696	-95.2148	-40.1001	-93.3838	-40.1001	-72.0215	-40.0696	-94.6045	-40.1001	-120.85	-40.1001	-92.1631	-40.1001	-103.76	-40.1001	-115.356	-40.0696	-98.2666	-40.0696	-110.474	-40.1001	-148.315	-40.1306	-111.694	-40.1001	-117.188	-40.1001	-148.315	-40.1001	-126.343	-40.1001	-148.315	-40.1001
0.2365	-64.6973	-40.1001	-68.3594	-40.1001	-82.3975	-40.1001	-111.084	-40.0696	-114.136	-40.1306	-73.2422	-40.0696	-85.4492	-40.1001	-108.032	-40.0696	-83.0078	-40.1001	-104.98	-40.1001	-88.501	-40.1001	-113.525	-40.1001	-109.863	-40.1001	-125.122	-40.1001	-112.915	-40.1001	-122.681	-40.1001	-142.212	-40.1001	-124.512	-40.1001	-151.367	-40.0696
0.237	-57.373	-40.1306	-67.749	-40.1306	-67.749	-40.1001	-112.305	-40.1001	-115.967	-40.1306	-86.0596	-40.1001	-93.9941	-40.1001	-100.098	-40.1001	-72.0215	-40.1001	-101.929	-40.1001	-117.798	-40.1306	-103.76	-40.1001	-105.591	-40.1001	-126.343	-40.0696	-115.967	-40.1001	-109.253	-40.1001	-161.133	-40.1001	-128.174	-40.0696	-147.705	-40.0696
0.2375	-56.1523	-40.0696	-93.9941	-40.1306	-81.7871	-40.1001	-104.98	-40.1001	-120.85	-40.1306	-83.6182	-40.1001	-95.2148	-40.1001	-124.512	-40.1306	-70.1904	-40.1001	-108.032	-40.0696	-114.746	-40.1001	-93.3838	-40.1001	-118.408	-40.1001	-125.122	-40.1001	-122.07	-40.1001	-109.863	-40.1001	-135.498	-40.0696	-124.512	-40.1611	-135.498	-40.1001
0.238	-65.918	-40.1306	-79.3457	-40.0696	-65.918	-40.1306	-90.332	-40.1001	-105.591	-40.1001	-86.6699	-40.1001	-95.8252	-40.1001	-108.643	-40.1001	-89.1113	-40.0696	-104.98	-40.1001	-113.525	-40.1001	-96.4355	-40.1001	-119.629	-40.1001	-104.37	-40.1306	-115.967	-40.0696	-109.253	-40.1306	-153.809	-40.1306	-117.798	-40.1001	-150.757	-40.1306
0.2385	-59.2041	-40.1001	-64.6973	-40.1001	-69.5801	-40.1001	-101.318	-40.1001	-108.032	-40.1001	-106.812	-40.0696	-104.98	-40.1001	-121.46	-40.1306	-89.7217	-40.1306	-107.422	-40.1001	-112.915	-40.0696	-106.201	-40.0696	-120.239	-40.1306	-110.474	-40.0696	-112.305	-40.1001	-100.708	-40.0696	-146.484	-40.1001	-116.577	-40.1001	-144.653	-40.1001
0.239	-63.4766	-40.0696	-69.5801	-40.1001	-53.1006	-40.1001	-103.149	-40.1001	-117.798	-40.1001	-83.0078	-40.1001	-90.9424	-40.0696	-105.591	-40.1001	-75.6836	-40.1001	-112.305	-40.1001	-112.915	-40.1001	-97.6563	-40.0696	-99.4873	-40.1001	-115.967	-40.1001	-118.408	-40.0696	-122.07	-40.1001	-142.822	-40.1001	-117.798	-40.1001	-144.043	-40.0696
0.2395	-51.8799	-40.1001	-64.0869	-40.1001	-72.0215	-40.1001	-109.253	-40.1001	-117.798	-40.1001	-94.6045	-40.1001	-83.0078	-40.1001	-109.863	-40.1001	-85.4492	-40.1306	-109.253	-40.1306	-113.525	-40.1001	-93.3838	-40.1001	-128.174	-40.1306	-112.305	-40.1001	-116.577	-40.1001	-114.746	-40.0696	-135.498	-40.1001	-119.019	-40.1001	-148.315	-40.1001
0.24	-51.8799	-40.1001	-60.4248	-40.1001	-71.4111	-40.1306	-103.149	-40.0696	-109.253	-40.1306	-101.929	-40.1001	-81.1768	-40.1001	-91.5527	-40.1001	-87.2803	-40.0696	-107.422	-40.1001	-125.122	-40.1306	-101.318	-40.1001	-122.681	-40.1001	-119.019	-40.1001	-110.474	-40.0696	-126.343	-40.1001	-130.615	-40.0696	-135.498	-40.1001	-155.64	-40.1001
0.2405	-62.8662	-40.1306	-58.5938	-40.1001	-72.0215	-40.1001	-115.356	-40.1306	-124.512	-40.1001	-108.032	-40.0696	-95.8252	-40.1001	-90.9424	-40.1001	-92.1631	-40.1001	-108.643	-40.1001	-106.812	-40.0696	-114.746	-40.1001	-112.305	-40.1306	-126.953	-40.1306	-98.877	-40.0696	-106.201	-40.0696	-132.446	-40.0696	-113.525	-40.1306	-134.888	-40.0696
0.241	-59.8145	-40.0696	-64.0869	-40.0696	-70.1904	-40.1001	-101.318	-40.1001	-132.446	-40.1001	-109.863	-40.1001	-84.8389	-40.1001	-100.708	-40.0696	-81.1768	-40.1001	-112.915	-40.1001	-117.188	-40.1001	-97.6563	-40.1306	-114.746	-40.1001	-111.694	-40.0696	-97.6563	-40.1001	-104.98	-40.1001	-133.057	-40.1001	-121.46	-40.0696	-147.705	-40.1001
0.2415	-65.918	-40.1001	-62.2559	-40.1001	-75.0732	-40.1001	-105.591	-40.1001	-104.98	-40.1306	-96.4355	-40.1001	-90.332	-40.1001	-84.8389	-40.0696	-84.2285	-40.1001	-117.798	-40.0696	-116.577	-40.1001	-103.76	-40.1306	-111.084	-40.1001	-110.474	-40.1001	-92.7734	-40.1001	-122.07	-40.0696	-124.512	-40.0696	-147.705	-40.1306	-151.367	-40.1001
0.242	-62.2559	-40.0696	-68.3594	-40.1001	-60.4248	-40.1001	-101.929	-40.1001	-95.2148	-40.1001	-92.1631	-40.1001	-92.1631	-40.1001	-90.9424	-40.1001	-79.3457	-40.1001	-117.798	-40.1306	-111.084	-40.1001	-111.694	-40.1306	-98.2666	-40.0696	-138.55	-40.1001	-103.76	-40.1001	-112.915	-40.1001	-122.681	-40.1306	-139.16	-40.1001	-150.146	-40.0696
0.2425	-40.8936	-40.1306	-72.0215	-40.1001	-62.2559	-40.1001	-100.098	-40.1001	-105.591	-40.1001	-98.877	-40.1306	-101.318	-40.1001	-83.0078	-40.1001	-95.8252	-40.1001	-109.863	-40.1001	-105.591	-40.1001	-102.539	-40.1001	-117.798	-40.1001	-118.408	-40.1001	-104.98	-40.0696	-121.46	-40.1001	-127.563	-40.1001	-139.771	-40.0696	-156.25	-40.0696
0.243	-49.4385	-40.1001	-68.3594	-40.1306	-70.1904	-40.1001	-85.4492	-40.1306	-122.07	-40.1306	-121.46	-40.0696	-105.591	-40.1001	-91.5527	-40.0696	-86.0596	-40.1001	-112.305	-40.1001	-113.525	-40.1001	-94.6045	-40.1001	-115.967	-40.1001	-117.188	-40.0696	-114.136	-40.1001	-109.253	-40.1001	-123.901	-40.1001	-125.122	-40.0696	-145.264	-40.1001
0.2435	-51.8799	-40.1001	-73.2422	-40.1001	-77.5146	-40.0696	-70.1904	-40.1306	-106.201	-40.1306	-112.915	-40.1001	-89.1113	-40.1611	-83.6182	-40.1001	-87.8906	-40.1001	-106.201	-40.1306	-103.149	-40.1001	-99.4873	-40.1306	-125.122	-40.1306	-126.343	-40.1001	-112.915	-40.1001	-115.356	-40.0696	-140.381	-40.0696	-136.108	-40.1001	-156.25	-40.1001
0.244	-59.8145	-40.1001	-65.918	-40.1001	-72.6318	-40.0696	-85.4492	-40.1306	-104.37	-40.1001	-103.76	-40.0696	-106.812	-40.1001	-86.6699	-40.1001	-93.3838	-40.1306	-118.408	-40.1306	-114.746	-40.1001	-91.5527	-40.1001	-130.615	-40.1306	-116.577	-40.1306	-96.4355	-40.1001	-101.318	-40.1001	-149.536	-40.1001	-135.498	-40.1001	-158.691	-40.1001
0.2445	-64.6973	-40.1306	-70.8008	-40.1001	-74.4629	-40.1306	-76.9043	-40.1001	-114.746	-40.1306	-84.2285	-40.1001	-115.967	-40.1001	-108.032	-40.1001	-85.4492	-40.1001	-108.032	-40.1306	-117.188	-40.1001	-103.149	-40.1306	-117.798	-40.1001	-123.901	-40.1001	-98.2666	-40.1001	-120.85	-40.1001	-137.939	-40.1001	-122.07	-40.1001	-155.64	-40.1306
0.245	-56.7627	-40.1306	-71.4111	-40.1306	-63.4766	-40.1001	-78.7354	-40.1001	-106.812	-40.1306	-100.098	-40.1306	-100.098	-40.1001	-91.5527	-40.1001	-78.7354	-40.1001	-107.422	-40.1001	-104.37	-40.1306	-103.76	-40.1001	-127.563	-40.1001	-121.46	-40.1001	-93.3838	-40.1001	-119.629	-40.0696	-126.953	-40.1001	-125.122	-40.1306	-158.081	-40.1001
0.2455	-65.3076	-40.1001	-64.6973	-40.1306	-53.7109	-40.1001	-83.0078	-40.1001	-75.6836	-40.1001	-85.4492	-40.1001	-103.76	-40.1001	-79.9561	-40.1001	-73.2422	-40.1001	-109.253	-40.1001	-103.76	-40.1306	-106.812	-40.0696	-118.408	-40.1001	-104.98	-40.1001	-92.1631	-40.1001	-104.37	-40.1001	-128.174	-40.1306	-119.019	-40.1001	-150.757	-40.1001
0.246	-63.4766	-40.0696	-72.0215	-40.1001	-67.1387	-40.1001	-79.9561	-40.1001	-78.7354	-40.1306	-90.9424	-40.1001	-115.356	-40.1001	-112.305	-40.0696	-88.501	-40.1001	-95.8252	-40.0696	-110.474	-40.0696	-99.4873	-40.1001	-142.212	-40.1001	-122.07	-40.1001	-112.915	-40.1001	-125.122	-40.1001	-134.277	-40.1001	-107.422	-40.1306	-149.536	-40.1001
0.2465	-65.3076	-40.1001	-52.4902	-40.1001	-61.6455	-40.1001	-78.7354	-40.1001	-78.125	-40.0696	-103.149	-40.0696	-103.76	-40.0696	-95.2148	-40.1001	-79.9561	-40.1001	-111.694	-40.1001	-114.136	-40.1001	-102.539	-40.1306	-112.305	-40.0696	-115.356	-40.1306	-93.3838	-40.0696	-118.408	-40.1001	-134.277	-40.1001	-114.136	-40.1001	-156.25	-40.0696
0.247	-72.6318	-40.0696	-63.4766	-40.0696	-70.8008	-40.0696	-95.2148	-40.1001	-87.8906	-40.1001	-107.422	-40.1001	-89.7217	-40.1001	-92.7734	-40.1306	-71.4111	-40.0696	-101.318	-40.1001	-101.318	-40.1001	-103.76	-40.1001	-114.746	-40.0696	-117.798	-40.1001	-103.76	-40.0696	-105.591	-40.0696	-140.381	-40.1001	-130.615	-40.1001	-142.212	-40.0696
0.2475	-56.7627	-40.1001	-79.9561	-40.1001	-64.0869	-40.0696	-80.5664	-40.0696	-92.7734	-40.0696	-113.525	-40.1001	-92.1631	-40.1001	-86.0596	-40.1001	-77.5146	-40.1001	-99.4873	-40.1001	-106.201	-40.0696	-95.2148	-40.0696	-122.681	-40.1306	-111.084	-40.1001	-106.201	-40.0696	-110.474	-40.1001	-137.329	-40.1001	-125.122	-40.0696	-139.16	-40.1001
0.248	-70.1904	-40.1001	-75.6836	-40.1306	-75.6836	-40.1001	-89.7217	-40.1001	-90.332	-40.1001	-92.7734	-40.1001	-98.877	-40.1001	-95.8252	-40.1001	-88.501	-40.1001	-103.149	-40.1001	-111.084	-40.1001	-96.4355	-40.1001	-128.784	-40.1001	-101.929	-40.1001	-102.539	-40.1306	-112.305	-40.1001	-139.771	-40.1001	-129.395	-40.1001	-139.16	-40.1001
0.2485	-65.3076	-40.1306	-61.6455	-40.1001	-81.7871	-40.1001	-94.6045	-40.1306	-89.7217	-40.1001	-88.501	-40.1001	-96.4355	-40.1001	-100.098	-40.1001	-95.2148	-40.0696	-102.539	-40.1001	-103.76	-40.1306	-95.2148	-40.1306	-130.615	-40.1306	-108.643	-40.1306	-104.98	-40.1001	-101.318	-40.0696	-134.277	-40.1001	-123.901	-40.1306	-136.108	-40.1001
0.249	-75.0732	-40.1001	-72.0215	-40.1001	-70.8008	-40.1001	-95.8252	-40.0696	-90.332	-40.1306	-92.7734	-40.0696	-106.201	-40.1001	-93.3838	-40.1001	-79.9561	-40.1001	-106.201	-40.1001	-117.798	-40.0696	-100.098	-40.1306	-124.512	-40.1611	-123.901	-40.1001	-105.591	-40.1306	-104.98	-40.1001	-137.329	-40.1001	-117.798	-40.1001	-140.991	-40.1306
0.2495	-67.1387	-40.1306	-78.125	-40.1306	-79.3457	-40.0696	-98.2666	-40.1001	-75.0732	-40.1001	-91.5527	-40.1001	-107.422	-40.1001	-94.6045	-40.1001	-87.8906	-40.0696	-100.708	-40.1001	-115.356	-40.1001	-92.7734	-40.1001	-117.188	-40.0696	-124.512	-40.1001	-100.708	-40.1001	-117.188	-40.1001	-143.433	-40.1306	-117.798	-40.1001	-140.381	-40.1306
0.25	-57.9834	-40.1306	-77.5146	-40.1001	-77.5146	-40.1001	-90.9424	-40.1306	-76.2939	-40.1001	-89.1113	-40.1001	-107.422	-40.1001	-111.694	-40.1001	-95.8252	-40.1001	-100.708	-40.1001	-109.863	-40.1306	-89.1113	-40.0696	-119.629	-40.1306	-128.784	-40.1001	-117.798	-40.1306	-133.667	-40.1001	-130.005	-40.1306	-133.057	-40.1001	-131.836	-40.1001
0.2505	-69.5801	-40.1306	-75.6836	-40.1001	-69.5801	-40.1001	-86.0596	-40.1001	-71.4111	-40.1001	-84.8389	-40.1306	-103.76	-40.1001	-98.2666	-40.1001	-99.4873	-40.1001	-101.929	-40.0696	-107.422	-40.1001	-83.0078	-40.1001	-138.55	-40.1306	-135.498	-40.1001	-104.37	-40.1001	-131.836	-40.1306	-133.057	-40.1001	-120.239	-40.1001	-148.315	-40.1001
0.251	-68.9697	-40.1001	-82.3975	-40.1001	-72.6318	-40.1001	-89.7217	-40.1001	-88.501	-40.0696	-84.8389	-40.1001	-103.149	-40.1001	-96.4355	-40.1001	-81.7871	-40.1001	-88.501	-40.1001	-114.136	-40.0696	-80.5664	-40.1001	-134.888	-40.1001	-123.901	-40.0696	-126.343	-40.1001	-126.343	-40.1001	-144.653	-40.1001	-125.122	-40.0696	-149.536	-40.0696
0.2515	-78.7354	-40.1001	-80.5664	-40.1001	-76.9043	-40.1001	-97.0459	-40.1001	-89.7217	-40.1306	-86.6699	-40.0696	-98.2666	-40.1001	-106.812	-40.1306	-100.098	-40.1001	-96.4355	-40.1001	-110.474	-40.1001	-95.8252	-40.0696	-124.512	-40.0696	-125.732	-40.1001	-119.629	-40.1001	-125.122	-40.0696	-140.381	-40.1001	-119.629	-40.0696	-155.029	-40.0696
0.252	-72.6318	-40.1306	-73.2422	-40.1001	-80.5664	-40.1001	-92.1631	-40.1001	-89.7217	-40.1001	-90.9424	-40.0696	-90.332	-40.1306	-100.708	-40.0696	-95.8252	-40.0696	-96.4355	-40.0696	-103.76	-40.1001	-79.9561	-40.1001	-131.226	-40.1001	-120.85	-40.1001	-111.084	-40.0696	-118.408	-40.1001	-125.122	-40.0696	-123.901	-40.1306	-155.64	-40.0696
0.2525	-86.0596	-40.1001	-84.2285	-40.1001	-78.7354	-40.1001	-90.332	-40.1001	-93.3838	-40.1001	-81.7871	-40.1001	-102.539	-40.0696	-111.084	-40.1306	-101.318	-40.1001	-100.708	-40.0696	-107.422	-40.1001	-93.3838	-40.1001	-120.239	-40.1001	-133.667	-40.1001	-119.019	-40.1306	-115.967	-40.1001	-143.433	-40.1001	-136.719	-40.1001	-142.212	-40.1001
0.253	-63.4766	-40.1001	-74.4629	-40.1306	-54.3213	-40.0696	-96.4355	-40.1001	-85.4492	-40.1001	-75.0732	-40.1001	-108.643	-40.1001	-96.4355	-40.1001	-99.4873	-40.0696	-92.1631	-40.1001	-109.863	-40.0696	-82.3975	-40.0696	-128.784	-40.1001	-130.005	-40.1001	-100.708	-40.1001	-120.239	-40.1001	-150.146	-40.1001	-126.953	-40.1001	-149.536	-40.1001
0.2535	-61.6455	-40.1001	-65.3076	-40.1001	-68.3594	-40.0696	-78.7354	-40.0696	-94.6045	-40.1001	-79.9561	-40.0696	-89.1113	-40.1001	-104.98	-40.1306	-92.1631	-40.1001	-97.6563	-40.0696	-110.474	-40.1306	-78.125	-40.1306	-125.122	-40.1001	-121.46	-40.0696	-109.863	-40.0696	-115.967	-40.0696	-136.108	-40.1001	-134.888	-40.1306	-158.081	-40.1001
0.254	-76.2939	-40.0696	-83.0078	-40.0696	-67.749	-40.1001	-82.3975	-40.1001	-87.2803	-40.1001	-104.37	-40.1001	-100.098	-40.1001	-86.6699	-40.1001	-85.4492	-40.0696	-115.356	-40.1001	-95.8252	-40.1001	-96.4355	-40.1001	-114.136	-40.1306	-117.188	-40.1001	-100.708	-40.1306	-107.422	-40.1001	-134.888	-40.1001	-134.277	-40.1306	-151.978	-40.1001
0.2545	-65.918	-40.0696	-67.1387	-40.1001	-80.5664	-40.1001	-80.5664	-40.0696	-74.4629	-40.1306	-87.8906	-40.0696	-104.37	-40.0696	-90.9424	-40.1306	-79.3457	-40.0696	-93.9941	-40.1001	-115.967	-40.1001	-89.7217	-40.0696	-114.746	-40.1306	-123.291	-40.1306	-108.643	-40.1001	-112.305	-40.1001	-148.315	-40.1001	-121.46	-40.1001	-154.419	-40.1001
0.255	-45.7764	-40.0696	-58.5938	-40.1001	-78.125	-40.0696	-86.6699	-40.1306	-97.6563	-40.1001	-79.9561	-40.1001	-109.253	-40.0696	-94.6045	-40.1306	-89.1113	-40.1001	-108.032	-40.0696	-111.084	-40.1001	-88.501	-40.0696	-119.019	-40.1306	-136.719	-40.1001	-129.395	-40.1001	-102.539	-40.1001	-140.381	-40.0696	-114.746	-40.1001	-137.329	-40.1001
0.2555	-70.1904	-40.1001	-68.9697	-40.1306	-83.0078	-40.1306	-93.9941	-40.1001	-90.9424	-40.1001	-83.6182	-40.0696	-94.6045	-40.1001	-96.4355	-40.1001	-79.3457	-40.1001	-117.188	-40.0696	-104.37	-40.0696	-95.2148	-40.1001	-114.136	-40.1001	-125.122	-40.1001	-134.888	-40.1001	-109.253	-40.1001	-140.381	-40.1001	-130.615	-40.1001	-145.264	-40.1306
0.256	-73.2422	-40.1001	-71.4111	-40.1001	-80.5664	-40.1001	-92.1631	-40.1306	-82.3975	-40.0696	-89.1113	-40.0391	-96.4355	-40.1306	-117.798	-40.1001	-90.332	-40.1001	-103.149	-40.1001	-103.76	-40.1001	-98.2666	-40.1001	-112.915	-40.0696	-129.395	-40.1306	-134.277	-40.1001	-100.708	-40.1001	-128.174	-40.1001	-101.318	-40.1001	-148.926	-40.1001
0.2565	-64.6973	-40.1306	-81.1768	-40.1306	-75.6836	-40.0696	-103.76	-40.1001	-79.3457	-40.1001	-89.1113	-40.1001	-96.4355	-40.1001	-122.681	-40.1001	-92.1631	-40.1001	-96.4355	-40.1001	-100.098	-40.1001	-95.8252	-40.1306	-122.07	-40.1306	-123.901	-40.0696	-113.525	-40.1306	-109.253	-40.1001	-133.057	-40.1001	-130.005	-40.0696	-143.433	-40.1001
0.257	-62.2559	-40.1306	-62.2559	-40.1611	-69.5801	-40.1001	-92.7734	-40.1001	-82.3975	-40.1001	-89.7217	-40.1306	-105.591	-40.1306	-109.253	-40.1001	-92.1631	-40.0696	-107.422	-40.1001	-104.37	-40.1001	-86.6699	-40.1306	-127.563	-40.1001	-110.474	-40.1306	-118.408	-40.1001	-115.967	-40.1001	-138.55	-40.1001	-120.85	-40.1001	-158.081	-40.1001
0.2575	-66.5283	-40.1001	-67.1387	-40.1001	-67.1387	-40.1001	-82.3975	-40.1306	-105.591	-40.1306	-92.1631	-40.1001	-92.1631	-40.1001	-113.525	-40.0696	-89.7217	-40.0696	-103.149	-40.1001	-116.577	-40.1001	-85.4492	-40.0696	-118.408	-40.1001	-130.615	-40.1001	-139.771	-40.1306	-111.694	-40.1001	-126.953	-40.1306	-120.239	-40.1001	-151.978	-40.0696
0.258	-56.1523	-40.1001	-79.9561	-40.1001	-78.7354	-40.1001	-97.0459	-40.1001	-84.2285	-40.1306	-95.8252	-40.1001	-91.5527	-40.1001	-95.2148	-40.1001	-86.6699	-40.0696	-116.577	-40.1306	-110.474	-40.1306	-88.501	-40.1001	-121.46	-40.1001	-130.615	-40.1001	-130.615	-40.1001	-106.812	-40.1001	-145.874	-40.1001	-119.629	-40.1001	-150.146	-40.1001
0.2585	-61.6455	-40.1001	-68.3594	-40.1001	-80.5664	-40.1001	-111.694	-40.1001	-94.6045	-40.0696	-92.1631	-40.1001	-87.2803	-40.1001	-120.239	-40.1001	-93.3838	-40.0696	-104.98	-40.0696	-115.356	-40.1001	-104.37	-40.1001	-108.643	-40.1001	-109.863	-40.1001	-112.915	-40.1306	-100.098	-40.1306	-142.822	-40.1001	-121.46	-40.1001	-139.16	-40.1306
0.259	-60.4248	-40.1001	-79.9561	-40.1001	-73.8525	-40.0696	-92.1631	-40.1001	-103.76	-40.1001	-101.929	-40.1001	-98.2666	-40.1001	-105.591	-40.1001	-93.3838	-40.1001	-113.525	-40.1001	-100.708	-40.1306	-88.501	-40.1001	-100.708	-40.1306	-117.798	-40.1306	-114.136	-40.0696	-111.084	-40.1001	-136.108	-40.1306	-128.174	-40.1001	-152.588	-40.0696
0.2595	-60.4248	-40.0696	-86.0596	-40.0696	-72.0215	-40.1001	-87.8906	-40.1001	-80.5664	-40.1001	-94.6045	-40.1001	-102.539	-40.0696	-104.37	-40.1001	-90.332	-40.1001	-117.188	-40.1001	-114.746	-40.1001	-93.9941	-40.1001	-112.915	-40.1001	-143.433	-40.1001	-112.915	-40.0696	-126.953	-40.1001	-117.798	-40.1001	-120.239	-40.0696	-164.795	-40.0696
0.26	-57.9834	-40.1001	-63.4766	-40.1001	-80.5664	-40.1306	-95.2148	-40.1001	-87.8906	-40.0696	-104.37	-40.1001	-90.9424	-40.1306	-125.122	-40.1001	-84.2285	-40.1001	-101.318	-40.0696	-115.356	-40.1001	-72.6318	-40.1306	-107.422	-40.0696	-136.108	-40.0696	-113.525	-40.1001	-111.694	-40.0696	-128.784	-40.0696	-115.356	-40.1001	-150.757	-40.0696
0.2605	-64.0869	-40.1306	-79.3457	-40.1001	-85.4492	-40.1001	-93.9941	-40.1001	-81.1768	-40.1001	-89.1113	-40.1001	-92.1631	-40.1001	-108.032	-40.1001	-75.6836	-40.0696	-114.136	-40.1306	-108.643	-40.1306	-96.4355	-40.1001	-111.084	-40.0696	-125.122	-40.1001	-103.149	-40.1001	-114.746	-40.0391	-138.55	-40.1001	-114.746	-40.0696	-153.809	-40.1001
0.261	-64.6973	-40.1001	-73.2422	-40.1001	-87.8906	-40.1001	-87.8906	-40.1306	-76.2939	-40.0696	-92.1631	-40.1001	-92.7734	-40.0696	-126.953	-40.1001	-83.6182	-40.1001	-126.343	-40.0696	-106.201	-40.1001	-111.694	-40.1001	-102.539	-40.1001	-131.836	-40.1001	-104.37	-40.1001	-117.188	-40.1306	-140.381	-40.1306	-127.563	-40.1306	-142.822	-40.1306
0.2615	-81.1768	-40.1001	-70.8008	-40.1001	-61.6455	-40.1001	-108.032	-40.1001	-101.929	-40.0696	-77.5146	-40.1001	-97.6563	-40.1001	-112.305	-40.0696	-89.7217	-40.0696	-109.253	-40.1001	-134.277	-40.1001	-101.318	-40.1001	-100.708	-40.1001	-134.277	-40.1001	-108.032	-40.1001	-101.318	-40.0696	-134.277	-40.0696	-127.563	-40.1001	-152.588	-40.1306
0.262	-58.5938	-40.1001	-74.4629	-40.1001	-70.8008	-40.1306	-94.6045	-40.1001	-81.1768	-40.1001	-112.915	-40.1001	-108.032	-40.0696	-100.708	-40.1001	-79.3457	-40.0696	-111.694	-40.1001	-123.291	-40.1001	-114.746	-40.1001	-104.98	-40.1001	-126.343	-40.1001	-101.929	-40.1001	-114.136	-40.1001	-139.16	-40.1001	-136.719	-40.1001	-135.498	-40.1306
0.2625	-72.0215	-40.0696	-72.0215	-40.1001	-70.8008	-40.0696	-106.201	-40.1306	-90.9424	-40.1001	-103.149	-40.1001	-115.967	-40.1001	-102.539	-40.1001	-71.4111	-40.1001	-117.188	-40.0696	-102.539	-40.1001	-114.746	-40.0696	-102.539	-40.0696	-122.07	-40.1001	-120.85	-40.0696	-108.032	-40.1001	-149.536	-40.1001	-159.302	-40.1001	-123.291	-40.1001
0.263	-87.8906	-40.1001	-72.6318	-40.1001	-63.4766	-40.1001	-80.5664	-40.1001	-80.5664	-40.0696	-103.76	-40.1001	-97.0459	-40.1306	-122.07	-40.1001	-91.5527	-40.1001	-109.253	-40.1001	-117.798	-40.1001	-104.37	-40.1001	-94.6045	-40.1001	-111.084	-40.1001	-120.239	-40.1306	-118.408	-40.1306	-119.629	-40.0696	-137.939	-40.1001	-147.705	-40.1001
0.2635	-76.2939	-40.1001	-84.2285	-40.1306	-78.125	-40.0696	-79.9561	-40.1001	-87.8906	-40.1001	-90.9424	-40.1001	-100.098	-40.1306	-93.9941	-40.1001	-89.7217	-40.1001	-106.812	-40.1001	-123.291	-40.1001	-92.1631	-40.1001	-107.422	-40.1001	-109.863	-40.1001	-109.253	-40.0696	-110.474	-40.1001	-133.057	-40.1001	-121.46	-40.1001	-151.367	-40.1001
0.264	-67.1387	-40.1001	-83.6182	-40.1306	-64.0869	-40.0696	-107.422	-40.1001	-100.708	-40.1001	-93.3838	-40.1001	-110.474	-40.0696	-114.136	-40.1001	-92.1631	-40.1001	-104.37	-40.1001	-118.408	-40.1001	-86.0596	-40.1001	-109.863	-40.0696	-115.967	-40.0696	-111.694	-40.1306	-111.694	-40.0696	-140.991	-40.0696	-134.277	-40.1001	-150.146	-40.0696
0.2645	-70.1904	-40.1001	-64.0869	-40.1001	-65.918	-40.1306	-76.9043	-40.1001	-95.2148	-40.1001	-81.1768	-40.1001	-98.2666	-40.1001	-95.8252	-40.1306	-81.7871	-40.1001	-114.746	-40.1001	-125.732	-40.1306	-102.539	-40.1306	-120.239	-40.0696	-107.422	-40.1001	-103.76	-40.1001	-103.76	-40.1306	-136.719	-40.0696	-111.084	-40.1001	-155.029	-40.0696
0.265	-59.8145	-40.1001	-74.4629	-40.1306	-76.9043	-40.0696	-81.7871	-40.0696	-116.577	-40.1306	-114.136	-40.1001	-113.525	-40.1306	-109.863	-40.1306	-76.2939	-40.0696	-110.474	-40.0696	-126.343	-40.1001	-101.929	-40.1001	-112.915	-40.1001	-120.85	-40.0696	-119.629	-40.0696	-104.98	-40.1001	-145.264	-40.0696	-127.563	-40.1001	-151.978	-40.1001
0.2655	-84.8389	-40.1001	-93.3838	-40.1306	-81.1768	-40.1001	-78.7354	-40.1001	-104.37	-40.0696	-103.149	-40.1001	-107.422	-40.1001	-93.3838	-40.1001	-82.3975	-40.1001	-102.539	-40.1001	-105.591	-40.1001	-96.4355	-40.1001	-111.084	-40.1001	-120.239	-40.1001	-119.629	-40.1001	-121.46	-40.0696	-140.991	-40.1001	-118.408	-40.1306	-142.822	-40.1001
0.266	-73.2422	-40.0696	-89.7217	-40.1001	-76.2939	-40.1306	-80.5664	-40.1306	-84.8389	-40.1001	-106.201	-40.1001	-95.8252	-40.1001	-107.422	-40.1001	-91.5527	-40.1001	-99.4873	-40.0696	-122.07	-40.1001	-80.5664	-40.1001	-130.615	-40.1306	-127.563	-40.1001	-103.149	-40.1001	-110.474	-40.1306	-169.067	-40.1001	-123.901	-40.1001	-134.888	-40.1001
0.2665	-78.7354	-40.0696	-68.3594	-40.1001	-61.6455	-40.1306	-73.8525	-40.0696	-83.0078	-40.1001	-112.305	-40.1306	-104.37	-40.1001	-116.577	-40.0696	-83.6182	-40.0696	-100.098	-40.0696	-104.37	-40.1001	-98.2666	-40.1001	-113.525	-40.1001	-117.798	-40.1001	-103.76	-40.1306	-108.032	-40.1001	-157.471	-40.1306	-115.356	-40.1001	-133.057	-40.1001
0.267	-72.6318	-40.1306	-59.2041	-40.1306	-69.5801	-40.1306	-78.7354	-40.1001	-92.7734	-40.1001	-120.85	-40.1001	-99.4873	-40.1001	-111.084	-40.1306	-81.7871	-40.0696	-117.188	-40.1001	-118.408	-40.1001	-112.305	-40.1001	-121.46	-40.1001	-121.46	-40.1001	-111.084	-40.1306	-114.136	-40.1001	-136.108	-40.0696	-117.188	-40.1001	-138.55	-40.1001
0.2675	-86.0596	-40.1306	-81.1768	-40.1001	-76.9043	-40.1001	-87.2803	-40.0696	-85.4492	-40.0696	-112.305	-40.1001	-100.708	-40.1001	-110.474	-40.1001	-81.7871	-40.1001	-108.643	-40.1001	-127.563	-40.1001	-100.098	-40.1306	-117.188	-40.1306	-112.305	-40.1001	-119.629	-40.0696	-119.629	-40.1001	-144.653	-40.1001	-116.577	-40.1001	-133.057	-40.0696
0.268	-84.2285	-40.1306	-73.8525	-40.1001	-66.5283	-40.1001	-78.125	-40.1001	-91.5527	-40.1001	-95.2148	-40.1306	-108.032	-40.1306	-112.305	-40.1306	-74.4629	-40.1001	-100.098	-40.1001	-108.643	-40.1001	-104.37	-40.1001	-111.084	-40.0696	-104.37	-40.1306	-115.356	-40.0696	-130.005	-40.1001	-127.563	-40.0696	-117.798	-40.0696	-131.836	-40.1001
0.2685	-84.2285	-40.1306	-68.3594	-40.1306	-61.6455	-40.0696	-64.6973	-40.1001	-88.501	-40.1001	-94.6045	-40.0696	-99.4873	-40.1001	-101.929	-40.1306	-84.8389	-40.1001	-100.708	-40.1001	-100.708	-40.1001	-106.201	-40.1001	-105.591	-40.0696	-112.305	-40.1001	-119.629	-40.1001	-107.422	-40.1001	-151.978	-40.1001	-130.005	-40.1306	-142.822	-40.0696
0.269	-86.0596	-40.1001	-80.5664	-40.1001	-64.6973	-40.1001	-71.4111	-40.1001	-75.0732	-40.1001	-86.6699	-40.1001	-106.812	-40.1001	-111.084	-40.1001	-80.5664	-40.1001	-98.877	-40.0696	-106.812	-40.1001	-108.643	-40.1001	-123.291	-40.1306	-121.46	-40.1001	-111.694	-40.1306	-116.577	-40.1001	-157.471	-40.1001	-111.694	-40.1001	-141.602	-40.1306
0.2695	-90.9424	-40.0696	-77.5146	-40.1306	-68.9697	-40.1001	-88.501	-40.1306	-79.9561	-40.1001	-83.6182	-40.1001	-93.3838	-40.1001	-115.967	-40.1001	-79.3457	-40.1001	-101.318	-40.1001	-101.318	-40.1001	-113.525	-40.1306	-121.46	-40.1001	-109.253	-40.1001	-119.629	-40.1001	-120.85	-40.0696	-159.912	-40.1001	-119.019	-40.1001	-148.926	-40.1001
0.27	-67.749	-40.1001	-79.3457	-40.0696	-70.8008	-40.1001	-65.918	-40.1306	-89.7217	-40.1001	-87.2803	-40.0696	-87.8906	-40.1306	-95.8252	-40.1001	-98.2666	-40.0696	-103.149	-40.1001	-111.694	-40.1001	-112.915	-40.1001	-128.174	-40.1001	-123.291	-40.1001	-114.136	-40.1001	-121.46	-40.1001	-153.198	-40.1001	-139.16	-40.0696	-133.667	-40.0696
0.2705	-95.2148	-40.1306	-84.8389	-40.1001	-76.9043	-40.1001	-86.0596	-40.1001	-122.681	-40.1001	-98.2666	-40.1001	-101.318	-40.1001	-101.929	-40.1001	-88.501	-40.1306	-103.76	-40.0696	-102.539	-40.1001	-94.6045	-40.1001	-132.446	-40.1306	-111.694	-40.1001	-103.76	-40.1001	-122.681	-40.1306	-158.081	-40.0696	-130.615	-40.1001	-151.978	-40.0696
0.271	-81.7871	-40.1001	-86.0596	-40.1001	-68.3594	-40.0696	-87.2803	-40.1001	-88.501	-40.1001	-87.8906	-40.0696	-87.2803	-40.1001	-103.149	-40.1001	-101.318	-40.1001	-103.149	-40.0696	-108.032	-40.1001	-100.708	-40.1001	-131.836	-40.1001	-115.967	-40.1001	-103.76	-40.1306	-125.122	-40.1306	-158.691	-40.1306	-109.253	-40.0391	-140.381	-40.0391
0.2715	-84.8389	-40.1001	-80.5664	-40.1306	-68.9697	-40.1001	-80.5664	-40.1306	-92.1631	-40.1001	-86.0596	-40.1001	-93.9941	-40.1306	-97.6563	-40.1306	-93.9941	-40.1001	-101.929	-40.1001	-113.525	-40.1001	-91.5527	-40.1001	-125.122	-40.1306	-116.577	-40.0696	-109.253	-40.1001	-119.019	-40.1001	-167.236	-40.1306	-130.615	-40.1306	-145.264	-40.1001
0.272	-84.2285	-40.1306	-91.5527	-40.1001	-70.8008	-40.0696	-71.4111	-40.1001	-104.37	-40.1001	-90.9424	-40.1001	-90.332	-40.1001	-122.681	-40.1001	-88.501	-40.1001	-104.37	-40.1001	-106.201	-40.1306	-106.812	-40.1001	-122.681	-40.1001	-114.136	-40.1001	-120.85	-40.0696	-122.681	-40.1001	-159.912	-40.1001	-134.888	-40.1306	-166.016	-40.1001
0.2725	-88.501	-40.1001	-89.1113	-40.0696	-83.0078	-40.1001	-89.1113	-40.1001	-89.7217	-40.1001	-97.0459	-40.1306	-98.2666	-40.1001	-114.136	-40.1001	-93.9941	-40.0696	-92.7734	-40.1306	-108.032	-40.1001	-107.422	-40.1001	-126.343	-40.1001	-131.226	-40.0696	-131.226	-40.1001	-130.615	-40.1001	-177.002	-40.1001	-128.174	-40.1001	-140.991	-40.0696
0.273	-72.0215	-40.1001	-86.0596	-40.1001	-83.6182	-40.1001	-79.9561	-40.1001	-79.9561	-40.1001	-82.3975	-40.1001	-90.9424	-40.1001	-108.643	-40.0696	-83.0078	-40.1001	-107.422	-40.1001	-109.863	-40.1001	-111.084	-40.1306	-123.901	-40.1001	-111.694	-40.0696	-137.939	-40.1001	-119.629	-40.1001	-182.495	-40.1001	-117.188	-40.1306	-140.381	-40.1001
0.2735	-66.5283	-40.1001	-76.2939	-40.1001	-73.8525	-40.0696	-69.5801	-40.1306	-86.6699	-40.1306	-79.3457	-40.1306	-100.098	-40.1001	-112.305	-40.1001	-103.149	-40.1001	-114.136	-40.0696	-125.732	-40.1001	-91.5527	-40.1001	-103.149	-40.1001	-118.408	-40.1001	-124.512	-40.1001	-122.07	-40.1001	-154.419	-40.1001	-114.136	-40.1306	-142.212	-40.1001
0.274	-86.6699	-40.1306	-63.4766	-40.1001	-80.5664	-40.1001	-96.4355	-40.0696	-87.8906	-40.1001	-93.9941	-40.0696	-100.708	-40.1001	-77.5146	-40.1001	-105.591	-40.1001	-115.967	-40.1001	-117.188	-40.1001	-109.863	-40.1001	-101.318	-40.1306	-135.498	-40.1306	-138.55	-40.1001	-119.629	-40.1001	-153.198	-40.1306	-131.226	-40.1306	-141.602	-40.1306
0.2745	-79.3457	-40.1001	-97.6563	-40.1001	-79.9561	-40.1001	-90.9424	-40.1001	-65.3076	-40.1001	-82.3975	-40.0696	-104.37	-40.1001	-88.501	-40.1001	-106.201	-40.1001	-100.098	-40.1306	-106.201	-40.1001	-101.929	-40.1001	-112.305	-40.1001	-109.863	-40.1001	-130.005	-40.1306	-126.343	-40.1001	-148.315	-40.1001	-120.85	-40.0696	-155.64	-40.1001
0.275	-67.749	-40.1001	-87.8906	-40.1306	-80.5664	-40.1001	-83.6182	-40.1001	-75.0732	-40.0696	-85.4492	-40.0696	-98.877	-40.1001	-105.591	-40.1001	-93.3838	-40.1001	-109.863	-40.1001	-114.136	-40.1001	-96.4355	-40.1001	-104.37	-40.0696	-110.474	-40.1001	-128.174	-40.1001	-117.188	-40.1001	-137.939	-40.0696	-122.681	-40.1001	-144.653	-40.1001
0.2755	-76.9043	-40.1306	-82.3975	-40.1001	-78.7354	-40.1001	-95.2148	-40.1001	-92.1631	-40.1001	-83.0078	-40.0696	-104.98	-40.1001	-93.3838	-40.1001	-87.8906	-40.0696	-103.149	-40.0696	-109.253	-40.1001	-92.1631	-40.1001	-110.474	-40.1001	-117.188	-40.1001	-132.446	-40.1001	-127.563	-40.1001	-125.732	-40.1001	-130.005	-40.1306	-138.55	-40.1001
0.276	-78.7354	-40.1306	-71.4111	-40.1001	-65.3076	-40.1001	-91.5527	-40.1001	-84.8389	-40.1001	-90.9424	-40.1306	-86.6699	-40.1306	-106.201	-40.1001	-103.149	-40.1001	-100.708	-40.1001	-100.708	-40.1001	-96.4355	-40.0696	-109.863	-40.0696	-123.291	-40.1001	-133.667	-40.1001	-120.239	-40.1001	-135.498	-40.1001	-106.812	-40.1001	-159.912	-40.1001
0.2765	-75.6836	-40.1001	-83.0078	-40.1001	-75.0732	-40.1001	-92.1631	-40.1306	-78.7354	-40.1001	-83.6182	-40.0696	-86.6699	-40.1001	-102.539	-40.1001	-95.8252	-40.1306	-97.0459	-40.1001	-91.5527	-40.1001	-97.6563	-40.1001	-117.798	-40.1001	-114.136	-40.1001	-108.643	-40.0696	-114.136	-40.0696	-149.536	-40.1001	-126.953	-40.1001	-162.354	-40.1001
0.277	-67.749	-40.1001	-67.749	-40.1001	-70.1904	-40.1306	-100.708	-40.1001	-77.5146	-40.1001	-71.4111	-40.0696	-91.5527	-40.1001	-93.9941	-40.1001	-103.76	-40.1001	-94.6045	-40.1001	-87.2803	-40.1001	-103.76	-40.1306	-122.07	-40.1001	-98.2666	-40.1001	-124.512	-40.1001	-110.474	-40.0696	-146.484	-40.1306	-122.681	-40.1001	-161.743	-40.1001
0.2775	-77.5146	-40.1001	-71.4111	-40.1306	-81.1768	-40.0696	-98.877	-40.0696	-91.5527	-40.1306	-82.3975	-40.1001	-95.8252	-40.1001	-92.7734	-40.1001	-97.0459	-40.0696	-96.4355	-40.1001	-112.305	-40.0696	-103.149	-40.1001	-93.9941	-40.0696	-107.422	-40.1001	-119.629	-40.1001	-134.277	-40.1001	-134.277	-40.1001	-131.226	-40.1306	-147.705	-40.1306
0.278	-87.2803	-40.1306	-71.4111	-40.1001	-75.0732	-40.1001	-90.9424	-40.1001	-88.501	-40.1306	-84.8389	-40.0696	-93.9941	-40.1001	-100.098	-40.1001	-103.149	-40.1001	-102.539	-40.0696	-104.37	-40.1001	-98.2666	-40.0696	-109.863	-40.1001	-93.3838	-40.1306	-115.967	-40.1001	-121.46	-40.1306	-147.705	-40.1001	-126.953	-40.1001	-146.484	-40.1306
0.2785	-70.1904	-40.1306	-82.3975	-40.1001	-73.2422	-40.0696	-83.0078	-40.1306	-96.4355	-40.0696	-99.4873	-40.0696	-104.37	-40.1001	-102.539	-40.1001	-90.9424	-40.1001	-91.5527	-40.1001	-117.798	-40.1001	-108.643	-40.0696	-121.46	-40.1306	-108.032	-40.1001	-115.356	-40.1001	-111.084	-40.1001	-139.16	-40.1001	-137.939	-40.1001	-139.16	-40.1001
0.279	-82.3975	-40.1306	-79.3457	-40.1001	-72.0215	-40.1001	-73.2422	-40.1001	-98.877	-40.1001	-87.2803	-40.1306	-98.2666	-40.1001	-99.4873	-40.0696	-102.539	-40.1001	-106.812	-40.0696	-116.577	-40.1001	-93.3838	-40.1001	-103.76	-40.1306	-106.201	-40.0696	-108.643	-40.1001	-130.615	-40.1001	-137.939	-40.1306	-133.057	-40.1001	-154.419	-40.1001
0.2795	-79.9561	-40.1001	-74.4629	-40.1001	-79.3457	-40.1001	-76.9043	-40.1001	-105.591	-40.1306	-89.1113	-40.1001	-98.2666	-40.1001	-89.1113	-40.0696	-114.136	-40.1001	-106.201	-40.1306	-108.032	-40.1001	-98.877	-40.1001	-106.201	-40.1001	-118.408	-40.1001	-128.174	-40.1306	-122.681	-40.0696	-135.498	-40.0696	-142.212	-40.1306	-167.236	-40.0696
0.28	-75.0732	-40.1001	-83.0078	-40.1001	-77.5146	-40.1001	-81.1768	-40.1001	-105.591	-40.1001	-116.577	-40.1001	-101.929	-40.1001	-96.4355	-40.1001	-103.149	-40.1001	-89.1113	-40.1001	-111.694	-40.1001	-93.9941	-40.1001	-112.305	-40.1001	-124.512	-40.1001	-131.226	-40.1001	-109.863	-40.1001	-132.446	-40.1001	-134.277	-40.1001	-158.691	-40.1306
0.2805	-69.5801	-40.1001	-69.5801	-40.1001	-72.6318	-40.1001	-86.6699	-40.1001	-100.708	-40.1001	-112.305	-40.1001	-100.098	-40.1001	-98.2666	-40.1001	-87.2803	-40.1001	-109.863	-40.1001	-120.239	-40.1001	-100.098	-40.1001	-103.149	-40.0696	-111.084	-40.1001	-117.798	-40.1001	-109.253	-40.0696	-116.577	-40.1001	-133.057	-40.0696	-175.781	-40.1001
0.281	-78.7354	-40.1306	-89.7217	-40.1001	-67.1387	-40.1001	-98.877	-40.1001	-92.1631	-40.1611	-110.474	-40.1001	-100.708	-40.1001	-89.1113	-40.0696	-90.9424	-40.1001	-104.98	-40.1001	-111.084	-40.1001	-103.76	-40.1001	-102.539	-40.0696	-120.85	-40.1001	-109.253	-40.0696	-112.915	-40.0696	-119.629	-40.1001	-132.446	-40.1001	-162.964	-40.0696
0.2815	-78.125	-40.1001	-94.6045	-40.0391	-72.0215	-40.1001	-93.9941	-40.1001	-89.1113	-40.1306	-97.0459	-40.1306	-103.149	-40.1306	-93.9941	-40.1001	-87.8906	-40.1306	-127.563	-40.1001	-119.019	-40.1001	-99.4873	-40.1001	-98.2666	-40.1306	-105.591	-40.0696	-112.305	-40.1001	-111.694	-40.1001	-128.174	-40.1001	-126.953	-40.1001	-162.964	-40.1001
0.282	-53.7109	-40.0696	-84.2285	-40.1001	-81.1768	-40.1001	-84.2285	-40.1306	-100.098	-40.1306	-108.643	-40.1001	-97.6563	-40.0696	-104.37	-40.1001	-101.318	-40.1001	-122.07	-40.0696	-111.694	-40.1001	-100.708	-40.1001	-95.8252	-40.1001	-106.812	-40.1001	-114.746	-40.1001	-123.901	-40.1306	-133.667	-40.1001	-122.07	-40.1001	-142.822	-40.1001
0.2825	-74.4629	-40.1001	-84.2285	-40.1001	-59.2041	-40.1001	-74.4629	-40.1306	-108.643	-40.1306	-93.9941	-40.1001	-109.253	-40.1001	-80.5664	-40.1001	-81.7871	-40.0391	-106.812	-40.1306	-113.525	-40.1001	-109.253	-40.1001	-89.7217	-40.1001	-104.98	-40.1306	-122.07	-40.1001	-125.122	-40.1001	-146.484	-40.1306	-122.681	-40.0696	-142.212	-40.0696
0.283	-84.8389	-40.1306	-75.6836	-40.1001	-70.8008	-40.1001	-81.7871	-40.1001	-109.863	-40.1001	-98.2666	-40.1001	-108.032	-40.1001	-90.332	-40.1306	-92.7734	-40.1001	-103.76	-40.1001	-116.577	-40.0696	-96.4355	-40.1001	-108.643	-40.1001	-107.422	-40.0696	-114.746	-40.0696	-112.915	-40.1001	-125.732	-40.1001	-117.188	-40.0696	-140.991	-40.1306
0.2835	-70.1904	-40.1001	-90.9424	-40.1001	-76.2939	-40.1001	-57.9834	-40.0696	-104.37	-40.1001	-89.1113	-40.1001	-97.0459	-40.1001	-100.098	-40.1306	-95.8252	-40.1001	-100.098	-40.0696	-122.681	-40.0696	-109.253	-40.1001	-114.746	-40.1001	-102.539	-40.1001	-123.901	-40.1001	-123.291	-40.1306	-146.484	-40.0696	-128.174	-40.1001	-128.784	-40.1306
0.284	-70.1904	-40.1001	-87.2803	-40.1001	-79.9561	-40.1001	-79.9561	-40.1001	-90.9424	-40.0696	-103.149	-40.1001	-92.7734	-40.1611	-82.3975	-40.1001	-98.2666	-40.0696	-109.253	-40.1306	-131.226	-40.1001	-122.681	-40.1001	-114.746	-40.1001	-104.37	-40.0696	-116.577	-40.0696	-142.212	-40.1001	-135.498	-40.1001	-147.095	-40.1306	-126.953	-40.1001
0.2845	-62.2559	-40.1306	-73.2422	-40.0696	-82.3975	-40.1001	-76.9043	-40.1001	-102.539	-40.1001	-98.877	-40.1001	-103.149	-40.0696	-96.4355	-40.1001	-86.6699	-40.1001	-108.032	-40.1001	-111.084	-40.1306	-110.474	-40.0696	-103.149	-40.1306	-93.3838	-40.0696	-128.174	-40.0696	-120.239	-40.0696	-130.615	-40.1001	-127.563	-40.1001	-137.939	-40.1001
0.285	-83.6182	-40.1001	-76.2939	-40.1001	-68.9697	-40.0696	-64.6973	-40.1001	-102.539	-40.1001	-108.032	-40.1306	-105.591	-40.0696	-109.253	-40.1001	-89.1113	-40.1001	-89.1113	-40.1001	-128.174	-40.1306	-109.253	-40.1306	-97.6563	-40.1001	-105.591	-40.1001	-120.239	-40.1001	-139.771	-40.1001	-120.85	-40.1001	-133.057	-40.1001	-148.315	-40.1001
0.2855	-78.7354	-40.0696	-64.0869	-40.1306	-73.2422	-40.1001	-77.5146	-40.0696	-81.7871	-40.1306	-109.253	-40.1001	-116.577	-40.1001	-93.9941	-40.1001	-92.7734	-40.0696	-92.7734	-40.1001	-120.239	-40.1001	-108.643	-40.1001	-114.136	-40.1001	-114.136	-40.1001	-121.46	-40.1001	-125.732	-40.1001	-142.212	-40.0696	-122.681	-40.1306	-153.809	-40.1306
0.286	-75.6836	-40.1001	-97.0459	-40.1001	-87.2803	-40.1001	-64.0869	-40.1306	-76.9043	-40.1001	-93.9941	-40.0696	-95.2148	-40.1001	-95.2148	-40.1001	-100.708	-40.0696	-85.4492	-40.0696	-111.084	-40.1001	-107.422	-40.0696	-103.76	-40.1001	-112.915	-40.1001	-121.46	-40.1001	-126.343	-40.1001	-134.277	-40.1001	-124.512	-40.1306	-151.978	-40.1306
0.2865	-75.6836	-40.1001	-66.5283	-40.1001	-90.332	-40.0696	-79.3457	-40.1001	-90.332	-40.0696	-95.8252	-40.1306	-93.9941	-40.0696	-86.6699	-40.1001	-87.2803	-40.1001	-98.2666	-40.1306	-111.694	-40.1001	-111.084	-40.1001	-106.201	-40.1306	-99.4873	-40.1001	-119.019	-40.1001	-118.408	-40.1001	-131.836	-40.1001	-133.057	-40.1001	-132.446	-40.1001
0.287	-70.8008	-40.1306	-74.4629	-40.1001	-78.7354	-40.1306	-75.0732	-40.0696	-77.5146	-40.1001	-103.149	-40.1001	-104.37	-40.1001	-97.0459	-40.1306	-82.3975	-40.1001	-86.6699	-40.1001	-111.694	-40.1001	-104.98	-40.1001	-122.681	-40.1001	-114.746	-40.1001	-118.408	-40.1001	-112.915	-40.1001	-153.198	-40.1306	-125.122	-40.1001	-153.809	-40.1001
0.2875	-84.2285	-40.1306	-88.501	-40.1001	-73.2422	-40.1001	-67.1387	-40.1001	-81.1768	-40.1001	-109.253	-40.0696	-97.6563	-40.0696	-97.6563	-40.1001	-92.1631	-40.1306	-94.6045	-40.1001	-121.46	-40.1001	-104.98	-40.1001	-115.967	-40.1001	-109.863	-40.1001	-140.381	-40.0696	-125.122	-40.1001	-137.329	-40.1306	-128.174	-40.0696	-156.25	-40.1001
0.288	-79.9561	-40.1001	-88.501	-40.1306	-70.1904	-40.1001	-81.7871	-40.1001	-90.332	-40.0696	-101.318	-40.1001	-101.929	-40.1001	-91.5527	-40.1001	-90.9424	-40.1001	-90.9424	-40.1001	-118.408	-40.1001	-122.681	-40.1001	-112.915	-40.1001	-103.149	-40.0696	-125.122	-40.0696	-122.681	-40.1001	-153.198	-40.1306	-127.563	-40.1306	-136.108	-40.1001
0.2885	-76.2939	-40.1001	-79.3457	-40.1001	-84.2285	-40.1001	-85.4492	-40.1306	-91.5527	-40.1001	-86.6699	-40.0696	-101.929	-40.1001	-108.643	-40.1001	-91.5527	-40.1001	-99.4873	-40.1306	-116.577	-40.1001	-115.967	-40.1306	-126.953	-40.1001	-108.032	-40.1306	-123.291	-40.1001	-109.253	-40.1001	-142.822	-40.1001	-113.525	-40.1001	-130.615	-40.0696
0.289	-88.501	-40.1001	-85.4492	-40.1306	-58.5938	-40.1001	-77.5146	-40.1001	-87.8906	-40.1306	-100.708	-40.0696	-97.0459	-40.1001	-108.032	-40.1001	-81.7871	-40.1001	-97.6563	-40.1001	-109.253	-40.0696	-115.967	-40.1306	-109.863	-40.1001	-107.422	-40.1001	-137.939	-40.1001	-106.201	-40.0696	-151.978	-40.1306	-122.681	-40.1001	-154.419	-40.0696
0.2895	-70.8008	-40.1306	-91.5527	-40.1001	-73.8525	-40.1001	-80.5664	-40.0696	-80.5664	-40.1001	-86.0596	-40.1001	-108.643	-40.0696	-110.474	-40.1001	-95.2148	-40.1001	-114.136	-40.1001	-119.019	-40.0696	-115.967	-40.1306	-106.812	-40.1306	-103.149	-40.1001	-126.953	-40.1001	-106.201	-40.1001	-151.978	-40.1306	-133.057	-40.1001	-140.991	-40.1001
0.29	-75.6836	-40.1001	-83.6182	-40.1306	-66.5283	-40.1001	-66.5283	-40.1001	-80.5664	-40.1306	-89.7217	-40.1001	-103.149	-40.0696	-92.1631	-40.1001	-93.3838	-40.1001	-112.915	-40.1001	-111.084	-40.0696	-114.746	-40.1001	-92.7734	-40.1001	-109.253	-40.0696	-137.329	-40.1306	-109.253	-40.1001	-131.226	-40.1001	-124.512	-40.1001	-117.188	-40.1001
0.2905	-83.0078	-40.1001	-81.7871	-40.0696	-57.9834	-40.1001	-79.9561	-40.1001	-88.501	-40.1001	-98.2666	-40.1001	-109.863	-40.1306	-97.6563	-40.1001	-86.0596	-40.1001	-96.4355	-40.1001	-103.76	-40.1001	-106.812	-40.1001	-99.4873	-40.1001	-117.188	-40.1001	-114.136	-40.1001	-117.798	-40.1001	-140.991	-40.1001	-133.057	-40.1001	-123.291	-40.1001
0.291	-90.9424	-40.1001	-88.501	-40.0696	-64.0869	-40.1001	-91.5527	-40.0696	-86.6699	-40.0696	-85.4492	-40.1001	-89.1113	-40.0696	-104.98	-40.1001	-91.5527	-40.1306	-89.7217	-40.0696	-94.6045	-40.0696	-111.694	-40.0696	-103.149	-40.1001	-121.46	-40.1001	-123.291	-40.1001	-124.512	-40.1001	-125.122	-40.0696	-128.784	-40.0696	-128.174	-40.0696
0.2915	-81.7871	-40.1001	-87.8906	-40.1001	-70.1904	-40.0696	-92.7734	-40.0696	-87.2803	-40.0696	-88.501	-40.1001	-88.501	-40.1306	-112.305	-40.1001	-93.9941	-40.1001	-97.6563	-40.1001	-98.877	-40.0696	-113.525	-40.0696	-109.863	-40.1001	-114.136	-40.0696	-121.46	-40.1001	-112.305	-40.0696	-134.277	-40.1001	-134.888	-40.0696	-119.629	-40.1001
0.292	-92.1631	-40.1306	-85.4492	-40.1001	-72.0215	-40.0696	-81.1768	-40.1001	-84.2285	-40.1001	-82.3975	-40.1001	-101.929	-40.1306	-97.0459	-40.0696	-94.6045	-40.1306	-97.0459	-40.1306	-99.4873	-40.1306	-110.474	-40.1001	-112.915	-40.1001	-112.915	-40.1001	-103.149	-40.1001	-115.356	-40.0391	-141.602	-40.1306	-134.277	-40.1001	-147.705	-40.0696
0.2925	-83.6182	-40.0696	-80.5664	-40.1001	-73.2422	-40.1001	-75.0732	-40.1001	-86.6699	-40.1001	-102.539	-40.1001	-96.4355	-40.1001	-115.967	-40.1306	-101.318	-40.1001	-93.9941	-40.1001	-113.525	-40.1001	-111.084	-40.1306	-110.474	-40.1001	-108.032	-40.1001	-111.084	-40.1001	-117.798	-40.1001	-133.057	-40.1001	-136.719	-40.1001	-131.226	-40.1001
0.293	-89.1113	-40.0696	-64.0869	-40.1001	-64.0869	-40.1001	-92.7734	-40.0696	-79.3457	-40.1001	-97.6563	-40.1306	-100.098	-40.0696	-105.591	-40.1001	-92.7734	-40.0696	-93.9941	-40.0696	-112.915	-40.1001	-108.032	-40.1306	-108.032	-40.1001	-102.539	-40.1306	-101.929	-40.1001	-125.122	-40.1001	-136.108	-40.1001	-122.07	-40.1001	-138.55	-40.1001
0.2935	-75.0732	-40.1001	-80.5664	-40.1001	-76.2939	-40.1001	-78.7354	-40.1001	-84.8389	-40.1001	-95.2148	-40.1001	-96.4355	-40.1001	-106.812	-40.1001	-97.6563	-40.1001	-92.1631	-40.1001	-109.863	-40.0391	-104.37	-40.1001	-111.084	-40.0696	-113.525	-40.1306	-104.37	-40.1306	-131.226	-40.1001	-131.836	-40.1001	-127.563	-40.1001	-150.146	-40.1001
0.294	-85.4492	-40.0696	-85.4492	-40.1306	-72.0215	-40.1306	-98.2666	-40.0696	-99.4873	-40.1306	-108.032	-40.1001	-100.708	-40.1001	-101.929	-40.1001	-87.8906	-40.1306	-102.539	-40.1001	-109.863	-40.1001	-108.032	-40.1306	-105.591	-40.1306	-125.122	-40.1001	-102.539	-40.1001	-122.07	-40.1001	-128.174	-40.1001	-134.277	-40.1306	-137.329	-40.1001
0.2945	-67.1387	-40.1001	-90.332	-40.0696	-67.1387	-40.1001	-95.2148	-40.1001	-70.1904	-40.0696	-89.1113	-40.1001	-102.539	-40.1306	-118.408	-40.1001	-106.201	-40.1001	-111.084	-40.1306	-109.253	-40.1001	-108.643	-40.1001	-106.812	-40.1001	-108.643	-40.1001	-111.084	-40.1001	-115.356	-40.1001	-118.408	-40.0696	-121.46	-40.1001	-146.484	-40.1001
0.295	-70.1904	-40.1306	-92.1631	-40.1306	-66.5283	-40.1001	-75.0732	-40.1306	-78.7354	-40.0696	-93.3838	-40.1001	-101.929	-40.1001	-99.4873	-40.0696	-92.1631	-40.1001	-108.032	-40.1306	-108.032	-40.1001	-104.37	-40.0696	-120.85	-40.1001	-108.643	-40.1306	-118.408	-40.1001	-131.226	-40.1001	-131.836	-40.1001	-134.888	-40.0696	-139.771	-40.1001
0.2955	-93.9941	-40.0696	-84.8389	-40.1001	-70.1904	-40.1001	-82.3975	-40.1001	-91.5527	-40.1306	-98.2666	-40.1001	-101.929	-40.0696	-122.681	-40.1001	-109.253	-40.1306	-101.318	-40.1001	-113.525	-40.1306	-97.0459	-40.1306	-104.98	-40.1001	-126.953	-40.1001	-118.408	-40.0696	-121.46	-40.1001	-135.498	-40.1001	-128.174	-40.0696	-132.446	-40.1001
0.296	-79.9561	-40.0696	-76.2939	-40.1001	-74.4629	-40.1001	-92.7734	-40.0696	-78.7354	-40.0696	-107.422	-40.0696	-106.201	-40.1306	-95.8252	-40.0696	-106.201	-40.1001	-113.525	-40.1306	-106.201	-40.1001	-106.812	-40.1001	-98.2666	-40.0696	-128.784	-40.1001	-110.474	-40.0696	-122.07	-40.1001	-135.498	-40.0696	-109.253	-40.1001	-149.536	-40.1001
0.2965	-67.1387	-40.1001	-107.422	-40.1306	-73.8525	-40.1001	-95.2148	-40.1001	-84.8389	-40.1001	-97.6563	-40.0696	-103.76	-40.1306	-97.0459	-40.0391	-98.2666	-40.1001	-103.76	-40.1001	-98.2666	-40.1001	-111.084	-40.0696	-99.4873	-40.1001	-123.291	-40.1001	-124.512	-40.1001	-134.277	-40.0696	-158.081	-40.0696	-126.953	-40.1306	-140.381	-40.1001
0.297	-70.1904	-40.1306	-84.8389	-40.1306	-86.6699	-40.1306	-87.8906	-40.1001	-73.2422	-40.0696	-92.7734	-40.1001	-103.76	-40.1001	-101.318	-40.0696	-112.915	-40.1306	-98.877	-40.1001	-103.76	-40.1001	-93.3838	-40.1001	-113.525	-40.1001	-117.188	-40.1001	-110.474	-40.1001	-127.563	-40.1001	-150.146	-40.1001	-122.07	-40.1001	-148.315	-40.0696
0.2975	-75.6836	-40.1001	-91.5527	-40.1001	-78.7354	-40.1611	-87.8906	-40.0696	-83.0078	-40.1001	-93.3838	-40.1306	-106.201	-40.0696	-93.3838	-40.1001	-92.7734	-40.0696	-99.4873	-40.1001	-108.643	-40.1001	-114.136	-40.1001	-93.3838	-40.1306	-101.929	-40.1306	-114.746	-40.1001	-137.939	-40.1306	-133.667	-40.1001	-128.784	-40.1001	-159.912	-40.1001
0.298	-77.5146	-40.1306	-66.5283	-40.1001	-56.7627	-40.0696	-100.098	-40.1001	-84.8389	-40.1306	-93.9941	-40.1001	-114.136	-40.1001	-132.446	-40.1001	-98.877	-40.1001	-106.812	-40.0696	-120.239	-40.0696	-98.2666	-40.0696	-103.149	-40.1001	-103.149	-40.1001	-117.188	-40.1001	-129.395	-40.1306	-144.653	-40.1001	-122.681	-40.1001	-158.691	-40.0696
0.2985	-74.4629	-40.1001	-75.0732	-40.1001	-59.8145	-40.1001	-95.8252	-40.1001	-93.9941	-40.1001	-96.4355	-40.0696	-103.149	-40.1001	-122.07	-40.1001	-111.084	-40.1001	-108.032	-40.1001	-123.291	-40.1001	-104.37	-40.0696	-109.863	-40.1001	-104.37	-40.1001	-112.915	-40.1306	-109.253	-40.1001	-144.653	-40.1306	-123.291	-40.1001	-158.691	-40.1001
0.299	-71.4111	-40.1001	-72.0215	-40.1001	-65.918	-40.1001	-76.9043	-40.0696	-95.8252	-40.1001	-86.6699	-40.1001	-95.2148	-40.1001	-90.332	-40.1306	-96.4355	-40.1306	-100.098	-40.1001	-116.577	-40.0696	-98.877	-40.0696	-117.798	-40.1306	-100.708	-40.1001	-99.4873	-40.1001	-127.563	-40.1001	-156.86	-40.1001	-130.615	-40.0696	-150.146	-40.1001
0.2995	-79.9561	-40.1001	-72.6318	-40.1001	-80.5664	-40.1001	-73.8525	-40.0696	-105.591	-40.1306	-82.3975	-40.1306	-92.1631	-40.1001	-108.643	-40.1306	-100.098	-40.1306	-114.136	-40.1306	-119.019	-40.1001	-100.098	-40.1306	-108.643	-40.1001	-109.863	-40.1001	-101.929	-40.1001	-119.629	-40.1001	-136.719	-40.1001	-133.667	-40.1001	-153.198	-40.1001
0.3	-63.4766	-40.1001	-76.2939	-40.1001	-61.0352	-40.1001	-76.9043	-40.0696	-104.98	-40.1001	-108.032	-40.1306	-97.6563	-40.1001	-123.291	-40.1001	-106.201	-40.1001	-98.2666	-40.1001	-127.563	-40.1001	-112.305	-40.1001	-115.967	-40.1306	-109.253	-40.1001	-98.877	-40.1001	-101.929	-40.1001	-145.264	-40.1001	-130.005	-40.1001	-140.381	-40.0696
0.3005	-68.3594	-40.1001	-78.7354	-40.1001	-75.6836	-40.1001	-81.7871	-40.1001	-116.577	-40.1001	-89.7217	-40.1001	-93.9941	-40.1001	-114.136	-40.1001	-83.6182	-40.1306	-101.929	-40.1306	-133.057	-40.0696	-101.318	-40.1001	-105.591	-40.1001	-106.201	-40.0696	-101.318	-40.1001	-114.746	-40.0696	-139.771	-40.1001	-128.174	-40.1001	-151.367	-40.1001
0.301	-75.0732	-40.1001	-72.6318	-40.1001	-80.5664	-40.1306	-85.4492	-40.1001	-113.525	-40.1306	-89.7217	-40.1306	-105.591	-40.1001	-124.512	-40.1001	-89.1113	-40.0696	-111.694	-40.1306	-115.967	-40.1001	-115.356	-40.1306	-92.1631	-40.0696	-106.812	-40.1001	-108.643	-40.1001	-114.746	-40.1001	-149.536	-40.1001	-130.615	-40.1001	-153.809	-40.1001
0.3015	-68.9697	-40.1001	-67.749	-40.1001	-78.125	-40.1001	-84.2285	-40.1001	-114.136	-40.1001	-92.1631	-40.1001	-105.591	-40.1306	-123.291	-40.1306	-90.332	-40.1001	-104.98	-40.0696	-122.681	-40.1306	-105.591	-40.1001	-100.098	-40.1001	-114.746	-40.1001	-103.76	-40.1001	-114.136	-40.1306	-138.55	-40.1001	-136.719	-40.1001	-152.588	-40.1306
0.302	-65.918	-40.1001	-79.9561	-40.1001	-70.8008	-40.1306	-79.3457	-40.1001	-115.356	-40.1001	-94.6045	-40.1001	-109.253	-40.0696	-107.422	-40.0696	-88.501	-40.1001	-117.798	-40.0696	-106.812	-40.1001	-114.746	-40.1001	-92.7734	-40.1001	-117.798	-40.1001	-118.408	-40.1001	-92.1631	-40.1001	-146.484	-40.1001	-140.381	-40.1001	-148.315	-40.1001
0.3025	-74.4629	-40.1001	-79.3457	-40.1001	-74.4629	-40.1001	-79.9561	-40.1001	-118.408	-40.1001	-96.4355	-40.1306	-101.318	-40.1001	-95.8252	-40.1001	-92.1631	-40.0696	-101.929	-40.1001	-125.122	-40.0696	-126.343	-40.1001	-100.098	-40.1001	-129.395	-40.1001	-126.953	-40.1001	-107.422	-40.1306	-150.757	-40.1001	-122.681	-40.0696	-136.719	-40.0696
0.303	-89.1113	-40.1001	-86.6699	-40.1001	-71.4111	-40.1001	-73.8525	-40.1001	-104.98	-40.1001	-84.8389	-40.1001	-114.136	-40.1306	-101.929	-40.0696	-82.3975	-40.1001	-103.76	-40.1001	-116.577	-40.1001	-117.798	-40.1001	-109.253	-40.0696	-103.76	-40.0696	-126.343	-40.1306	-92.7734	-40.1001	-140.381	-40.1001	-135.498	-40.0696	-152.588	-40.0696
0.3035	-64.0869	-40.1001	-67.749	-40.1001	-77.5146	-40.1001	-62.2559	-40.1001	-112.305	-40.1001	-92.1631	-40.1001	-109.253	-40.0696	-122.681	-40.1001	-87.2803	-40.1001	-107.422	-40.0696	-109.863	-40.0696	-98.2666	-40.1306	-123.901	-40.1001	-98.2666	-40.1001	-106.201	-40.0696	-100.708	-40.1306	-141.602	-40.0696	-130.615	-40.1001	-157.471	-40.1001
0.304	-69.5801	-40.1001	-55.542	-40.1001	-65.918	-40.1001	-84.2285	-40.1306	-106.201	-40.0696	-101.318	-40.1306	-114.136	-40.1001	-111.084	-40.1001	-77.5146	-40.0696	-104.98	-40.1001	-108.032	-40.1306	-105.591	-40.1001	-124.512	-40.1001	-107.422	-40.1001	-111.694	-40.1306	-108.643	-40.0696	-149.536	-40.0696	-144.043	-40.1001	-157.471	-40.1001
0.3045	-68.9697	-40.1001	-53.7109	-40.1001	-68.9697	-40.1001	-74.4629	-40.0696	-101.929	-40.1001	-99.4873	-40.1001	-93.9941	-40.1001	-98.2666	-40.1001	-84.8389	-40.1306	-110.474	-40.1001	-119.629	-40.1001	-122.681	-40.1001	-123.901	-40.1001	-109.253	-40.1001	-106.812	-40.1001	-98.2666	-40.1001	-152.588	-40.1001	-126.343	-40.1306	-151.367	-40.0696
0.305	-85.4492	-40.1001	-81.7871	-40.1001	-73.8525	-40.1001	-81.7871	-40.1001	-106.201	-40.1001	-103.149	-40.0696	-101.929	-40.1001	-107.422	-40.0696	-85.4492	-40.0696	-108.643	-40.1306	-126.343	-40.1001	-119.629	-40.0696	-112.915	-40.1001	-129.395	-40.1001	-114.136	-40.1001	-103.149	-40.0696	-149.536	-40.1001	-133.057	-40.1001	-148.926	-40.1001
0.3055	-89.1113	-40.1001	-80.5664	-40.1001	-64.0869	-40.1001	-83.0078	-40.1001	-103.76	-40.1001	-95.2148	-40.1001	-100.098	-40.1001	-109.253	-40.1001	-86.6699	-40.1001	-111.694	-40.1001	-101.929	-40.1001	-111.694	-40.1001	-125.732	-40.1001	-115.967	-40.1001	-108.032	-40.1001	-108.032	-40.1001	-151.978	-40.1001	-129.395	-40.1001	-142.822	-40.1306
0.306	-77.5146	-40.1306	-84.8389	-40.0696	-76.9043	-40.1306	-76.9043	-40.1001	-91.5527	-40.1306	-113.525	-40.1306	-111.694	-40.1001	-95.8252	-40.1001	-81.7871	-40.0696	-90.332	-40.1001	-115.967	-40.1306	-104.37	-40.1001	-123.901	-40.1001	-126.343	-40.1001	-120.239	-40.1001	-103.149	-40.1306	-164.795	-40.1001	-134.277	-40.1001	-153.198	-40.1001
0.3065	-69.5801	-40.1001	-53.7109	-40.0696	-69.5801	-40.1306	-76.9043	-40.1001	-98.2666	-40.0696	-92.7734	-40.1001	-112.915	-40.0696	-90.9424	-40.1306	-95.8252	-40.1001	-91.5527	-40.0696	-104.37	-40.1306	-93.9941	-40.0696	-123.291	-40.1001	-131.836	-40.1306	-106.201	-40.0696	-90.9424	-40.1306	-152.588	-40.0696	-131.836	-40.0696	-124.512	-40.1001
0.307	-92.1631	-40.1306	-53.7109	-40.1001	-54.9316	-40.0696	-76.2939	-40.1306	-108.643	-40.1001	-102.539	-40.0696	-108.643	-40.1306	-95.8252	-40.1001	-90.332	-40.0696	-93.3838	-40.1001	-104.98	-40.1001	-111.084	-40.0696	-112.915	-40.1306	-126.343	-40.1001	-100.098	-40.1306	-101.929	-40.1001	-160.522	-40.1001	-142.822	-40.1001	-139.16	-40.1001
0.3075	-94.6045	-40.1001	-73.8525	-40.1306	-60.4248	-40.0696	-71.4111	-40.1001	-93.9941	-40.0696	-96.4355	-40.1001	-102.539	-40.1001	-93.9941	-40.1001	-81.7871	-40.1001	-90.332	-40.1306	-106.201	-40.1001	-108.643	-40.1001	-123.901	-40.1001	-114.746	-40.1001	-107.422	-40.1001	-108.643	-40.1001	-159.912	-40.1001	-137.939	-40.1306	-137.939	-40.0696
0.308	-81.1768	-40.0696	-62.8662	-40.1001	-64.0869	-40.1001	-88.501	-40.0696	-97.6563	-40.0696	-92.1631	-40.1001	-103.76	-40.1001	-100.098	-40.1306	-87.2803	-40.0696	-92.7734	-40.0696	-94.6045	-40.1306	-112.305	-40.1001	-117.188	-40.1001	-114.136	-40.1306	-107.422	-40.1001	-92.1631	-40.1001	-158.691	-40.1306	-127.563	-40.1001	-145.874	-40.0696
0.3085	-97.0459	-40.1306	-59.2041	-40.1306	-48.8281	-40.1001	-93.3838	-40.0696	-92.1631	-40.1001	-68.9697	-40.1001	-107.422	-40.1306	-106.812	-40.1001	-72.6318	-40.0696	-82.3975	-40.1001	-109.863	-40.0696	-114.746	-40.1001	-125.732	-40.1001	-119.629	-40.0696	-102.539	-40.1001	-104.37	-40.1001	-142.822	-40.1001	-120.239	-40.1001	-131.836	-40.0696
0.309	-74.4629	-40.1001	-65.918	-40.1001	-60.4248	-40.1001	-89.1113	-40.1001	-89.7217	-40.1306	-75.6836	-40.1001	-113.525	-40.1001	-111.084	-40.1001	-89.1113	-40.0391	-90.332	-40.1001	-109.253	-40.1001	-117.798	-40.1001	-114.746	-40.1001	-122.681	-40.1001	-112.305	-40.1306	-106.201	-40.1001	-161.133	-40.1306	-120.85	-40.1001	-141.602	-40.1001
0.3095	-76.9043	-40.0696	-74.4629	-40.1001	-63.4766	-40.1001	-81.1768	-40.1001	-95.8252	-40.1306	-88.501	-40.1001	-116.577	-40.1001	-108.643	-40.1306	-94.6045	-40.1001	-90.332	-40.1306	-106.812	-40.1001	-102.539	-40.1001	-118.408	-40.1001	-127.563	-40.1306	-135.498	-40.1001	-103.149	-40.0696	-178.223	-40.1001	-117.798	-40.1001	-158.691	-40.1001
0.31	-89.1113	-40.0696	-70.8008	-40.1001	-54.9316	-40.1306	-81.7871	-40.1001	-84.8389	-40.0696	-68.9697	-40.1001	-111.694	-40.1001	-112.305	-40.1001	-93.3838	-40.1001	-90.9424	-40.1001	-117.798	-40.1001	-119.629	-40.1306	-118.408	-40.1001	-140.991	-40.1001	-108.643	-40.1306	-102.539	-40.1001	-165.405	-40.1001	-141.602	-40.1001	-157.471	-40.1001
0.3105	-80.5664	-40.1001	-70.1904	-40.1001	-64.6973	-40.1001	-68.3594	-40.1306	-75.0732	-40.1001	-80.5664	-40.1306	-94.6045	-40.1306	-100.708	-40.0696	-84.2285	-40.1306	-87.8906	-40.1001	-114.746	-40.0696	-106.812	-40.1001	-93.9941	-40.1001	-129.395	-40.1001	-119.019	-40.1306	-106.201	-40.1306	-155.029	-40.0696	-133.057	-40.1306	-148.315	-40.1001
0.311	-84.8389	-40.1306	-79.9561	-40.0696	-87.2803	-40.1001	-84.2285	-40.1001	-85.4492	-40.0696	-72.6318	-40.1001	-115.967	-40.1001	-108.032	-40.1306	-86.0596	-40.0696	-109.253	-40.1001	-108.032	-40.0696	-106.201	-40.0696	-109.863	-40.1001	-127.563	-40.1306	-114.136	-40.1001	-95.8252	-40.1306	-156.86	-40.1001	-125.732	-40.1001	-153.198	-40.0696
0.3115	-84.2285	-40.1001	-81.1768	-40.1001	-80.5664	-40.0696	-67.749	-40.1001	-82.3975	-40.0696	-78.7354	-40.1001	-114.746	-40.1001	-107.422	-40.1001	-89.7217	-40.1001	-95.2148	-40.1001	-91.5527	-40.1001	-122.07	-40.1001	-130.005	-40.1001	-136.108	-40.0696	-117.798	-40.0696	-112.305	-40.1306	-139.771	-40.1001	-139.16	-40.1001	-154.419	-40.0696
0.312	-86.0596	-40.1001	-76.2939	-40.1001	-71.4111	-40.0696	-78.7354	-40.1001	-81.1768	-40.0696	-76.2939	-40.1001	-101.929	-40.0696	-103.149	-40.1001	-93.3838	-40.0696	-104.37	-40.0696	-104.37	-40.0696	-104.37	-40.0696	-111.084	-40.1001	-114.136	-40.1001	-115.967	-40.1001	-103.76	-40.1001	-148.926	-40.1001	-147.095	-40.1001	-162.964	-40.1001
0.3125	-93.3838	-40.1001	-78.125	-40.1001	-68.3594	-40.1306	-90.332	-40.1306	-89.7217	-40.1001	-81.7871	-40.1001	-103.149	-40.0696	-93.9941	-40.1001	-88.501	-40.1306	-86.6699	-40.1001	-106.812	-40.1001	-108.643	-40.1001	-129.395	-40.1001	-132.446	-40.1306	-115.967	-40.1001	-108.032	-40.1001	-145.874	-40.1306	-128.174	-40.1306	-142.822	-40.0696
0.313	-73.2422	-40.1001	-75.6836	-40.1001	-72.6318	-40.1001	-76.9043	-40.1001	-86.0596	-40.1001	-82.3975	-40.1001	-103.76	-40.1001	-103.76	-40.1306	-84.8389	-40.1306	-94.6045	-40.0696	-120.85	-40.1001	-110.474	-40.1001	-115.356	-40.1001	-126.953	-40.1001	-116.577	-40.1306	-126.953	-40.1001	-133.057	-40.0696	-123.291	-40.1611	-142.212	-40.1001
0.3135	-57.373	-40.0696	-82.3975	-40.1001	-62.8662	-40.1001	-84.8389	-40.1306	-83.0078	-40.1001	-93.9941	-40.1001	-114.136	-40.0696	-106.201	-40.1001	-83.6182	-40.1001	-98.2666	-40.0696	-119.019	-40.1001	-107.422	-40.1001	-90.9424	-40.1001	-145.264	-40.0696	-118.408	-40.1001	-114.746	-40.1001	-133.667	-40.0696	-142.822	-40.1001	-155.029	-40.1001
0.314	-83.6182	-40.1001	-73.8525	-40.1001	-60.4248	-40.1001	-84.8389	-40.1306	-92.7734	-40.1001	-87.2803	-40.0696	-106.812	-40.1001	-86.0596	-40.1306	-87.2803	-40.1001	-100.098	-40.1001	-106.812	-40.1001	-111.694	-40.0696	-107.422	-40.0696	-134.277	-40.1306	-111.084	-40.1306	-110.474	-40.1001	-138.55	-40.1001	-131.836	-40.1001	-150.757	-40.1001
0.3145	-75.6836	-40.1306	-66.5283	-40.1306	-70.1904	-40.1001	-92.7734	-40.1306	-91.5527	-40.0696	-87.8906	-40.1001	-109.253	-40.0696	-77.5146	-40.1001	-100.708	-40.1001	-105.591	-40.1001	-115.356	-40.1306	-108.032	-40.1001	-100.708	-40.1001	-121.46	-40.1001	-117.798	-40.1001	-123.291	-40.1306	-133.667	-40.1001	-129.395	-40.0696	-156.86	-40.0696
0.315	-66.5283	-40.0696	-76.9043	-40.1001	-87.8906	-40.1001	-101.929	-40.1001	-81.7871	-40.1001	-93.3838	-40.1001	-101.929	-40.1001	-97.0459	-40.1001	-89.1113	-40.1001	-103.76	-40.1306	-115.356	-40.1001	-117.798	-40.1001	-111.694	-40.1001	-125.122	-40.1001	-118.408	-40.1001	-123.901	-40.1306	-128.174	-40.1001	-113.525	-40.1001	-153.809	-40.1001
0.3155	-62.2559	-40.1001	-86.0596	-40.1001	-87.8906	-40.1001	-87.8906	-40.1001	-114.746	-40.1001	-78.7354	-40.0696	-107.422	-40.1306	-96.4355	-40.1001	-93.3838	-40.1001	-101.318	-40.1001	-114.136	-40.0696	-101.929	-40.1001	-111.084	-40.1306	-127.563	-40.1001	-98.2666	-40.1001	-111.084	-40.1001	-141.602	-40.1306	-147.095	-40.1001	-155.64	-40.1001
0.316	-64.6973	-40.1001	-57.9834	-40.1001	-76.9043	-40.1001	-86.0596	-40.1001	-106.201	-40.0696	-90.332	-40.1001	-114.746	-40.1306	-100.098	-40.1001	-98.877	-40.1001	-97.6563	-40.1611	-116.577	-40.1001	-91.5527	-40.1306	-111.694	-40.1001	-109.863	-40.1001	-122.681	-40.1001	-124.512	-40.1306	-141.602	-40.0696	-129.395	-40.0696	-157.471	-40.1001
0.3165	-70.8008	-40.1001	-74.4629	-40.1306	-81.1768	-40.1001	-86.0596	-40.1001	-103.149	-40.0696	-104.98	-40.1001	-106.201	-40.1306	-108.643	-40.0696	-99.4873	-40.0696	-108.643	-40.1306	-91.5527	-40.1001	-93.9941	-40.1001	-125.122	-40.0696	-135.498	-40.1001	-118.408	-40.1001	-123.291	-40.0696	-151.978	-40.1611	-137.939	-40.1001	-155.64	-40.1001
0.317	-73.8525	-40.1001	-67.749	-40.1306	-78.125	-40.1001	-93.9941	-40.1001	-102.539	-40.1001	-83.0078	-40.1001	-98.2666	-40.1001	-108.032	-40.1001	-100.098	-40.1001	-90.332	-40.1001	-103.149	-40.0696	-90.9424	-40.1001	-126.343	-40.1001	-153.198	-40.1001	-111.084	-40.1306	-113.525	-40.1001	-164.795	-40.1001	-130.615	-40.1001	-160.522	-40.1001
0.3175	-67.1387	-40.1001	-72.0215	-40.1001	-73.8525	-40.1001	-77.5146	-40.1001	-117.188	-40.1306	-95.8252	-40.1001	-100.708	-40.1001	-93.3838	-40.1306	-94.6045	-40.1001	-101.929	-40.0696	-103.76	-40.1001	-100.098	-40.1001	-120.239	-40.1001	-151.367	-40.0696	-100.708	-40.1001	-113.525	-40.1001	-158.691	-40.1306	-122.681	-40.1001	-172.119	-40.0696
0.318	-72.6318	-40.1001	-68.9697	-40.1001	-97.0459	-40.1306	-93.3838	-40.0696	-100.098	-40.1001	-104.98	-40.1306	-104.37	-40.1001	-97.6563	-40.1306	-97.0459	-40.1001	-93.9941	-40.1001	-101.318	-40.1001	-73.8525	-40.1001	-104.98	-40.1001	-147.095	-40.1001	-115.967	-40.1001	-115.967	-40.1306	-153.198	-40.1001	-133.057	-40.1001	-159.912	-40.1001
0.3185	-67.1387	-40.1001	-70.8008	-40.0696	-83.6182	-40.1001	-90.9424	-40.1001	-97.0459	-40.1001	-93.9941	-40.1306	-96.4355	-40.1001	-104.98	-40.1306	-92.1631	-40.1001	-101.318	-40.0696	-111.084	-40.1306	-94.6045	-40.1001	-107.422	-40.1306	-140.381	-40.1306	-115.356	-40.1306	-108.032	-40.1001	-159.302	-40.1306	-128.174	-40.1001	-170.898	-40.1306
0.319	-79.3457	-40.1001	-79.9561	-40.1001	-67.749	-40.1001	-74.4629	-40.1001	-117.188	-40.1001	-85.4492	-40.1001	-91.5527	-40.1001	-96.4355	-40.0696	-100.708	-40.1001	-93.9941	-40.1001	-106.812	-40.1001	-87.2803	-40.1001	-122.681	-40.1001	-136.108	-40.1001	-112.305	-40.1001	-128.174	-40.1001	-142.822	-40.1306	-131.836	-40.1001	-156.25	-40.1001
0.3195	-70.1904	-40.1306	-65.918	-40.1001	-75.0732	-40.1306	-72.0215	-40.1001	-112.305	-40.1001	-74.4629	-40.1001	-97.6563	-40.1306	-98.2666	-40.1001	-93.9941	-40.1306	-103.76	-40.1001	-112.915	-40.1001	-85.4492	-40.1306	-124.512	-40.1001	-119.019	-40.1001	-95.2148	-40.1001	-125.122	-40.1001	-133.057	-40.1001	-119.019	-40.1001	-141.602	-40.1001
0.32	-81.1768	-40.1001	-78.7354	-40.1001	-81.1768	-40.1306	-78.7354	-40.1001	-123.901	-40.1001	-87.8906	-40.1001	-93.3838	-40.1001	-92.1631	-40.1001	-102.539	-40.1001	-101.318	-40.1001	-114.746	-40.1306	-99.4873	-40.0696	-116.577	-40.0696	-128.784	-40.0696	-91.5527	-40.1001	-102.539	-40.0391	-150.146	-40.0696	-127.563	-40.1001	-135.498	-40.1001
0.3205	-70.1904	-40.1001	-72.0215	-40.1306	-72.0215	-40.1306	-89.1113	-40.1306	-106.201	-40.0696	-86.0596	-40.1001	-87.2803	-40.1001	-78.125	-40.0696	-83.0078	-40.1001	-115.356	-40.1306	-94.6045	-40.1001	-95.8252	-40.1001	-120.85	-40.1001	-115.356	-40.0696	-95.8252	-40.0696	-113.525	-40.1001	-137.329	-40.0696	-120.239	-40.1001	-137.939	-40.1306
0.321	-56.7627	-40.1306	-81.7871	-40.1001	-89.7217	-40.1306	-88.501	-40.1001	-106.201	-40.1001	-87.2803	-40.1001	-83.0078	-40.1001	-83.0078	-40.1001	-78.7354	-40.0696	-98.877	-40.1001	-97.0459	-40.1001	-99.4873	-40.0696	-108.032	-40.1001	-98.877	-40.1001	-96.4355	-40.0696	-115.356	-40.1306	-131.836	-40.1001	-126.953	-40.1001	-159.302	-40.1001
0.3215	-58.5938	-40.0696	-89.7217	-40.1001	-79.3457	-40.1001	-97.6563	-40.1001	-108.643	-40.1001	-101.929	-40.1306	-104.98	-40.1001	-83.6182	-40.0696	-83.0078	-40.1001	-99.4873	-40.1001	-98.2666	-40.1001	-100.098	-40.1001	-112.305	-40.1001	-119.019	-40.1001	-93.9941	-40.1001	-130.615	-40.1001	-123.901	-40.1001	-137.939	-40.1001	-156.25	-40.1001
0.322	-72.0215	-40.0696	-67.1387	-40.1001	-74.4629	-40.1001	-72.6318	-40.1001	-103.76	-40.1001	-93.9941	-40.0696	-121.46	-40.1001	-111.694	-40.1001	-81.7871	-40.1306	-108.643	-40.0696	-108.032	-40.1306	-101.318	-40.1306	-109.863	-40.1001	-124.512	-40.1306	-101.318	-40.1001	-115.967	-40.1001	-121.46	-40.1001	-134.888	-40.1001	-142.212	-40.1001
0.3225	-64.0869	-40.1001	-62.8662	-40.1001	-59.2041	-40.0696	-88.501	-40.1001	-113.525	-40.0696	-95.2148	-40.1001	-114.136	-40.1001	-94.6045	-40.1001	-100.708	-40.1001	-94.6045	-40.0696	-117.798	-40.1001	-104.37	-40.1001	-109.253	-40.1001	-136.719	-40.1001	-114.136	-40.1001	-106.812	-40.1001	-150.146	-40.1001	-142.822	-40.1001	-142.822	-40.1001
0.323	-87.8906	-40.1001	-56.1523	-40.1001	-68.9697	-40.1001	-82.3975	-40.0696	-112.305	-40.1306	-89.1113	-40.1001	-107.422	-40.1306	-91.5527	-40.1001	-98.877	-40.1001	-108.032	-40.1001	-94.6045	-40.1001	-83.6182	-40.1001	-119.019	-40.0696	-111.084	-40.0696	-99.4873	-40.1001	-120.239	-40.1001	-119.019	-40.1001	-137.939	-40.0696	-147.095	-40.1001
0.3235	-57.373	-40.1001	-61.0352	-40.0696	-67.1387	-40.1001	-84.8389	-40.1001	-114.136	-40.1001	-85.4492	-40.0696	-103.76	-40.1306	-98.2666	-40.1001	-90.9424	-40.1306	-94.6045	-40.1001	-109.253	-40.1001	-92.1631	-40.1001	-110.474	-40.1001	-115.356	-40.0696	-100.708	-40.1001	-106.812	-40.1306	-126.343	-40.0696	-136.108	-40.1001	-158.081	-40.0696
0.324	-78.125	-40.1306	-81.7871	-40.1001	-74.4629	-40.1001	-93.9941	-40.0696	-113.525	-40.1001	-93.9941	-40.1001	-101.929	-40.1306	-87.2803	-40.1001	-100.098	-40.1001	-98.2666	-40.1306	-108.643	-40.1306	-100.708	-40.1306	-105.591	-40.1001	-98.877	-40.0696	-109.863	-40.1001	-120.239	-40.1306	-119.629	-40.1001	-125.732	-40.1001	-143.433	-40.1001
0.3245	-80.5664	-40.1306	-70.1904	-40.0696	-92.1631	-40.0696	-73.8525	-40.1001	-116.577	-40.1001	-92.7734	-40.0696	-92.7734	-40.1001	-81.7871	-40.1001	-90.9424	-40.0696	-99.4873	-40.1306	-112.915	-40.1001	-101.318	-40.1001	-112.915	-40.1001	-98.877	-40.0696	-103.149	-40.1001	-125.122	-40.1001	-117.188	-40.1001	-124.512	-40.1001	-155.64	-40.1001
0.325	-81.1768	-40.1306	-69.5801	-40.1001	-69.5801	-40.1001	-78.7354	-40.1001	-133.667	-40.1001	-98.2666	-40.1001	-104.37	-40.1001	-90.332	-40.0696	-90.332	-40.1001	-98.877	-40.1306	-108.032	-40.1001	-103.149	-40.1001	-114.136	-40.1001	-100.708	-40.1001	-101.929	-40.1001	-119.019	-40.1001	-134.277	-40.1001	-120.85	-40.1001	-150.146	-40.1001
0.3255	-83.6182	-40.1001	-64.6973	-40.1001	-55.542	-40.1001	-70.8008	-40.1001	-108.643	-40.1306	-104.98	-40.1001	-116.577	-40.1001	-102.539	-40.1001	-90.9424	-40.1001	-107.422	-40.0696	-106.201	-40.1001	-95.8252	-40.1001	-152.588	-40.1001	-97.0459	-40.0696	-112.915	-40.1001	-130.005	-40.1001	-138.55	-40.1001	-113.525	-40.1001	-154.419	-40.1001
0.326	-78.125	-40.1306	-71.4111	-40.1001	-71.4111	-40.1001	-89.7217	-40.1001	-106.812	-40.1306	-93.3838	-40.1001	-112.305	-40.1001	-93.3838	-40.1001	-84.8389	-40.1001	-113.525	-40.1001	-128.784	-40.1001	-111.694	-40.1001	-147.095	-40.1001	-122.07	-40.1306	-117.798	-40.1001	-138.55	-40.1001	-144.043	-40.1001	-111.694	-40.0696	-128.174	-40.1001
0.3265	-88.501	-40.1001	-75.0732	-40.1001	-72.6318	-40.1306	-83.6182	-40.1001	-106.201	-40.1001	-95.8252	-40.1001	-111.694	-40.1001	-84.8389	-40.1306	-106.201	-40.1306	-98.877	-40.1001	-116.577	-40.1306	-104.98	-40.1001	-117.188	-40.1001	-120.85	-40.1001	-102.539	-40.1001	-119.629	-40.1001	-141.602	-40.1001	-114.746	-40.1001	-146.484	-40.1306
0.327	-98.877	-40.1001	-72.6318	-40.0696	-72.0215	-40.1001	-79.9561	-40.1001	-103.149	-40.1001	-83.6182	-40.1001	-114.746	-40.1001	-98.877	-40.1001	-91.5527	-40.1306	-101.929	-40.0696	-103.149	-40.0696	-96.4355	-40.1001	-138.55	-40.0391	-119.019	-40.1001	-126.953	-40.1001	-133.667	-40.1001	-151.367	-40.1001	-119.019	-40.1001	-129.395	-40.1001
0.3275	-88.501	-40.0696	-81.1768	-40.1306	-63.4766	-40.1001	-88.501	-40.0696	-106.812	-40.1001	-100.098	-40.1001	-99.4873	-40.1001	-111.084	-40.1001	-95.2148	-40.0696	-111.084	-40.1001	-108.643	-40.0696	-107.422	-40.1001	-147.705	-40.0696	-142.822	-40.1001	-113.525	-40.1001	-118.408	-40.0696	-148.315	-40.0696	-125.122	-40.1001	-137.939	-40.0696
0.328	-90.332	-40.1001	-55.542	-40.1001	-62.2559	-40.0696	-74.4629	-40.0696	-106.201	-40.1001	-101.929	-40.1001	-110.474	-40.1001	-102.539	-40.1306	-96.4355	-40.1001	-114.746	-40.1001	-103.149	-40.1001	-117.798	-40.1001	-159.302	-40.1001	-121.46	-40.1001	-124.512	-40.1001	-125.122	-40.0696	-147.705	-40.1001	-117.798	-40.1001	-128.174	-40.0696
0.3285	-74.4629	-40.1306	-57.373	-40.0696	-73.2422	-40.1001	-79.3457	-40.1001	-96.4355	-40.1001	-79.9561	-40.1001	-112.305	-40.0696	-106.201	-40.1001	-80.5664	-40.1001	-102.539	-40.0696	-115.356	-40.1001	-106.201	-40.1001	-147.705	-40.1001	-131.226	-40.1001	-108.643	-40.0696	-118.408	-40.0696	-148.315	-40.1001	-134.888	-40.0696	-138.55	-40.1001
0.329	-72.6318	-40.1001	-74.4629	-40.1001	-65.3076	-40.1001	-78.125	-40.1001	-104.37	-40.1001	-81.7871	-40.1001	-113.525	-40.1306	-89.1113	-40.1001	-80.5664	-40.1001	-105.591	-40.1306	-101.929	-40.1001	-103.149	-40.1001	-138.55	-40.1001	-132.446	-40.1001	-123.291	-40.1306	-123.291	-40.1001	-140.381	-40.1001	-125.732	-40.0696	-145.264	-40.1306
0.3295	-87.8906	-40.1001	-79.9561	-40.1001	-80.5664	-40.0696	-79.9561	-40.1306	-103.149	-40.1306	-91.5527	-40.1001	-128.784	-40.1001	-103.149	-40.0696	-84.8389	-40.0696	-111.694	-40.1001	-115.967	-40.0696	-110.474	-40.1001	-141.602	-40.1001	-123.901	-40.1001	-115.967	-40.1001	-133.667	-40.1001	-144.043	-40.1001	-123.291	-40.0696	-159.912	-40.1306
0.33	-90.332	-40.0696	-57.373	-40.1001	-70.8008	-40.1001	-76.9043	-40.1001	-111.694	-40.1001	-79.9561	-40.1001	-114.746	-40.0696	-101.318	-40.0696	-95.8252	-40.1001	-112.915	-40.1001	-100.708	-40.1001	-111.084	-40.1306	-145.874	-40.1001	-141.602	-40.1001	-112.305	-40.1001	-132.446	-40.1001	-117.188	-40.1306	-134.277	-40.1001	-144.653	-40.1001
0.3305	-84.2285	-40.1001	-59.8145	-40.1001	-59.8145	-40.1306	-77.5146	-40.1001	-95.8252	-40.1001	-77.5146	-40.1306	-108.032	-40.1001	-88.501	-40.1306	-84.2285	-40.1001	-101.929	-40.1001	-94.6045	-40.0696	-106.201	-40.0696	-139.16	-40.1306	-144.653	-40.0696	-123.291	-40.1001	-136.719	-40.1001	-129.395	-40.1001	-121.46	-40.1001	-162.964	-40.0696
0.331	-68.9697	-40.1306	-68.3594	-40.1001	-78.7354	-40.1001	-80.5664	-40.1001	-93.9941	-40.1306	-82.3975	-40.1001	-107.422	-40.1001	-114.136	-40.1001	-96.4355	-40.1001	-103.149	-40.1001	-101.318	-40.1001	-111.084	-40.1001	-126.343	-40.1306	-130.615	-40.1001	-126.343	-40.1001	-120.85	-40.1001	-130.615	-40.1001	-122.07	-40.1001	-159.302	-40.1001
0.3315	-84.8389	-40.0696	-59.2041	-40.1001	-68.3594	-40.1306	-83.6182	-40.1306	-104.37	-40.1001	-83.6182	-40.0696	-94.6045	-40.1001	-112.915	-40.1001	-90.9424	-40.1001	-109.863	-40.1001	-98.2666	-40.1001	-102.539	-40.0696	-135.498	-40.1001	-129.395	-40.0696	-123.291	-40.1001	-125.122	-40.1306	-145.874	-40.1306	-128.784	-40.0696	-156.86	-40.0696
0.332	-74.4629	-40.1306	-71.4111	-40.1001	-72.6318	-40.1306	-99.4873	-40.1001	-97.6563	-40.1306	-68.9697	-40.0696	-95.2148	-40.1306	-112.305	-40.1306	-100.098	-40.1001	-92.7734	-40.1001	-94.6045	-40.1001	-94.6045	-40.1306	-134.277	-40.1306	-143.433	-40.0696	-114.136	-40.1001	-132.446	-40.0696	-122.681	-40.1001	-137.939	-40.1306	-160.522	-40.1306
0.3325	-90.332	-40.1306	-72.6318	-40.1001	-69.5801	-40.1001	-84.2285	-40.1001	-95.2148	-40.1306	-78.7354	-40.1001	-111.694	-40.0696	-108.032	-40.1001	-100.708	-40.0696	-93.9941	-40.1306	-107.422	-40.1001	-97.6563	-40.1001	-137.939	-40.1001	-128.784	-40.1001	-114.746	-40.0696	-130.615	-40.0696	-134.277	-40.1001	-122.07	-40.1306	-161.743	-40.0696
0.333	-84.2285	-40.1001	-66.5283	-40.1306	-70.8008	-40.1001	-92.1631	-40.0696	-104.98	-40.1001	-87.2803	-40.1001	-97.6563	-40.1001	-97.6563	-40.1001	-92.1631	-40.1001	-99.4873	-40.1001	-102.539	-40.1001	-87.2803	-40.1001	-125.122	-40.1001	-124.512	-40.1001	-122.07	-40.1001	-126.343	-40.0696	-134.277	-40.0696	-136.719	-40.1001	-147.705	-40.0696
0.3335	-64.0869	-40.1001	-61.6455	-40.1306	-68.9697	-40.1001	-86.0596	-40.1001	-104.98	-40.1306	-86.6699	-40.1306	-102.539	-40.0696	-107.422	-40.1001	-110.474	-40.0696	-97.6563	-40.0696	-100.708	-40.1001	-97.0459	-40.1306	-129.395	-40.1306	-120.239	-40.1001	-128.784	-40.1001	-126.343	-40.0696	-135.498	-40.1001	-143.433	-40.1001	-151.367	-40.0696
0.334	-84.2285	-40.1001	-65.918	-40.1001	-70.8008	-40.1001	-100.098	-40.1306	-90.332	-40.1306	-87.2803	-40.1001	-104.37	-40.0696	-102.539	-40.1306	-102.539	-40.0696	-106.812	-40.1001	-101.318	-40.0696	-90.332	-40.1001	-114.136	-40.1001	-133.667	-40.1306	-126.953	-40.1001	-119.019	-40.1001	-120.85	-40.1001	-137.329	-40.1306	-162.964	-40.1306
0.3345	-71.4111	-40.1306	-81.1768	-40.1001	-64.0869	-40.1001	-88.501	-40.1001	-91.5527	-40.1001	-90.332	-40.0696	-97.0459	-40.1001	-107.422	-40.1001	-88.501	-40.1306	-109.253	-40.1001	-109.863	-40.1001	-97.6563	-40.1306	-129.395	-40.1001	-130.615	-40.1001	-133.057	-40.1001	-111.694	-40.1001	-128.174	-40.1001	-130.005	-40.1306	-162.964	-40.1001
0.335	-77.5146	-40.1001	-51.8799	-40.1001	-84.2285	-40.1306	-103.76	-40.1001	-115.356	-40.0696	-74.4629	-40.0696	-97.6563	-40.1001	-106.812	-40.1001	-94.6045	-40.0696	-133.667	-40.1001	-105.591	-40.1001	-95.2148	-40.1001	-130.615	-40.1001	-140.381	-40.1306	-125.732	-40.0391	-131.836	-40.1306	-134.888	-40.1001	-161.133	-40.1001	-158.081	-40.1001
0.3355	-71.4111	-40.0696	-69.5801	-40.1001	-69.5801	-40.1001	-93.9941	-40.0696	-125.732	-40.1306	-71.4111	-40.0696	-100.098	-40.1001	-108.032	-40.1306	-102.539	-40.1306	-109.863	-40.1001	-100.708	-40.0696	-119.629	-40.1001	-115.967	-40.1001	-127.563	-40.1001	-124.512	-40.1306	-122.681	-40.1001	-139.771	-40.1001	-135.498	-40.1306	-155.64	-40.1001
0.336	-74.4629	-40.1306	-75.6836	-40.1001	-73.8525	-40.1001	-103.76	-40.0696	-125.732	-40.1001	-78.7354	-40.0696	-106.201	-40.1001	-108.643	-40.1001	-105.591	-40.1306	-103.76	-40.1306	-89.7217	-40.0696	-108.032	-40.1001	-135.498	-40.1001	-117.188	-40.1001	-125.732	-40.1001	-130.615	-40.1001	-148.926	-40.1001	-117.798	-40.0696	-156.25	-40.1001
0.3365	-64.6973	-40.1001	-68.9697	-40.1001	-71.4111	-40.0696	-71.4111	-40.1001	-95.2148	-40.0696	-84.8389	-40.1306	-109.253	-40.1001	-100.708	-40.0696	-97.0459	-40.0696	-120.85	-40.1306	-103.149	-40.1001	-95.2148	-40.1001	-133.057	-40.1001	-138.55	-40.1001	-119.629	-40.0696	-139.16	-40.0696	-146.484	-40.1001	-144.653	-40.1001	-156.86	-40.0696
0.337	-75.6836	-40.1001	-75.0732	-40.1306	-74.4629	-40.1306	-88.501	-40.1306	-94.6045	-40.1306	-76.9043	-40.1001	-95.8252	-40.1306	-112.915	-40.1001	-110.474	-40.1001	-107.422	-40.1001	-98.877	-40.1001	-92.1631	-40.1001	-119.629	-40.1001	-122.681	-40.0696	-99.4873	-40.1306	-126.953	-40.1306	-142.212	-40.1001	-136.108	-40.1001	-153.809	-40.1001
0.3375	-75.6836	-40.0696	-72.0215	-40.1001	-74.4629	-40.1001	-75.6836	-40.1001	-119.629	-40.1001	-98.2666	-40.0696	-98.877	-40.1001	-101.318	-40.1001	-90.9424	-40.1306	-101.929	-40.1001	-102.539	-40.1306	-90.332	-40.1001	-131.226	-40.1306	-128.784	-40.1001	-122.07	-40.1001	-136.719	-40.1001	-148.926	-40.1001	-128.784	-40.1001	-147.705	-40.1001
0.338	-73.2422	-40.1001	-63.4766	-40.1001	-80.5664	-40.1306	-78.7354	-40.1001	-89.1113	-40.0696	-100.098	-40.1001	-114.746	-40.1001	-111.084	-40.1306	-104.98	-40.1001	-96.4355	-40.1001	-96.4355	-40.1306	-97.0459	-40.1001	-123.291	-40.1001	-134.277	-40.0696	-106.201	-40.1001	-120.239	-40.1001	-161.133	-40.1001	-125.122	-40.0696	-155.64	-40.1306
0.3385	-73.2422	-40.0696	-60.4248	-40.1001	-76.2939	-40.1001	-84.2285	-40.1001	-115.356	-40.1611	-88.501	-40.1001	-95.8252	-40.1001	-90.332	-40.1306	-101.318	-40.0696	-95.8252	-40.0696	-108.643	-40.1001	-95.2148	-40.1001	-118.408	-40.0696	-126.953	-40.1001	-104.98	-40.1306	-119.019	-40.1001	-159.302	-40.1306	-121.46	-40.1306	-144.653	-40.1001
0.339	-76.2939	-40.1001	-71.4111	-40.0696	-74.4629	-40.0696	-72.0215	-40.1306	-94.6045	-40.1001	-100.098	-40.1001	-106.812	-40.1001	-110.474	-40.1306	-95.8252	-40.1001	-104.98	-40.0696	-111.084	-40.1001	-89.7217	-40.1001	-114.136	-40.1001	-134.888	-40.0696	-114.746	-40.1001	-117.188	-40.1001	-158.691	-40.1306	-136.108	-40.1001	-147.095	-40.1001
0.3395	-84.2285	-40.1001	-60.4248	-40.1001	-78.7354	-40.1001	-91.5527	-40.1001	-103.76	-40.1001	-77.5146	-40.1001	-97.6563	-40.1306	-88.501	-40.1001	-95.2148	-40.1001	-100.098	-40.1001	-114.136	-40.1001	-104.37	-40.1001	-97.0459	-40.1001	-143.433	-40.1306	-106.201	-40.1001	-106.812	-40.0696	-138.55	-40.1001	-119.019	-40.1001	-147.095	-40.1306
0.34	-78.7354	-40.1306	-74.4629	-40.1001	-68.3594	-40.1001	-76.2939	-40.1001	-106.201	-40.1001	-106.812	-40.1001	-103.76	-40.1001	-94.6045	-40.1001	-106.812	-40.1001	-100.098	-40.1001	-116.577	-40.0696	-109.863	-40.1001	-106.201	-40.1001	-133.057	-40.1001	-113.525	-40.1001	-105.591	-40.1001	-126.953	-40.1001	-132.446	-40.1001	-137.329	-40.1306
0.3405	-79.9561	-40.1001	-84.8389	-40.1001	-67.1387	-40.1001	-91.5527	-40.1306	-102.539	-40.1001	-99.4873	-40.0696	-83.0078	-40.1001	-90.9424	-40.1001	-104.37	-40.1001	-103.76	-40.1306	-122.07	-40.1001	-99.4873	-40.1306	-113.525	-40.1001	-125.122	-40.1001	-119.629	-40.1001	-124.512	-40.0696	-137.329	-40.1001	-125.732	-40.1001	-150.146	-40.0696
0.341	-68.9697	-40.1001	-70.8008	-40.1001	-84.8389	-40.0696	-106.201	-40.1001	-88.501	-40.1306	-103.76	-40.1001	-95.8252	-40.1001	-99.4873	-40.1001	-108.643	-40.1001	-103.149	-40.1001	-110.474	-40.1306	-103.149	-40.1001	-108.643	-40.1306	-144.043	-40.1306	-101.318	-40.1001	-110.474	-40.1001	-127.563	-40.1306	-126.953	-40.0696	-146.484	-40.1001
0.3415	-70.8008	-40.1001	-61.0352	-40.1306	-72.6318	-40.1001	-109.863	-40.1306	-116.577	-40.1001	-102.539	-40.1001	-113.525	-40.0696	-97.6563	-40.0696	-88.501	-40.1001	-103.149	-40.1001	-114.136	-40.1001	-98.877	-40.1306	-114.746	-40.1306	-111.084	-40.0696	-118.408	-40.1001	-109.253	-40.1001	-119.629	-40.1001	-142.212	-40.1001	-159.302	-40.1306
0.342	-58.5938	-40.1001	-67.1387	-40.1611	-76.9043	-40.1001	-89.1113	-40.1001	-101.929	-40.0696	-109.253	-40.0696	-105.591	-40.1001	-101.929	-40.1001	-79.9561	-40.1001	-105.591	-40.1001	-105.591	-40.0696	-98.877	-40.1001	-114.746	-40.1001	-144.043	-40.1001	-114.136	-40.1001	-108.643	-40.1001	-137.939	-40.1001	-120.239	-40.1001	-159.912	-40.1306
0.3425	-72.6318	-40.1001	-75.6836	-40.1306	-57.373	-40.0696	-101.318	-40.1001	-94.6045	-40.0696	-109.863	-40.0696	-93.9941	-40.1001	-100.098	-40.1001	-98.2666	-40.1001	-101.318	-40.1001	-106.201	-40.1001	-89.7217	-40.1001	-109.253	-40.1306	-142.212	-40.1001	-121.46	-40.1001	-98.877	-40.0696	-142.822	-40.1001	-117.798	-40.1001	-142.822	-40.1001
0.343	-90.332	-40.1001	-77.5146	-40.1001	-62.2559	-40.1001	-78.125	-40.0696	-106.201	-40.1306	-106.201	-40.1001	-104.98	-40.1001	-101.318	-40.1306	-91.5527	-40.1306	-108.032	-40.1001	-114.136	-40.1001	-103.149	-40.1001	-112.305	-40.1001	-145.874	-40.1001	-120.239	-40.1001	-115.356	-40.1001	-144.043	-40.0696	-123.291	-40.1001	-150.757	-40.0696
0.3435	-67.749	-40.1001	-70.1904	-40.1306	-55.542	-40.1001	-86.6699	-40.0696	-119.019	-40.1001	-104.98	-40.0696	-112.305	-40.1306	-106.201	-40.0696	-77.5146	-40.1001	-121.46	-40.1306	-105.591	-40.1001	-104.37	-40.1306	-115.356	-40.1001	-130.005	-40.1001	-120.85	-40.1001	-121.46	-40.1001	-137.329	-40.1001	-132.446	-40.1001	-139.16	-40.0696
0.344	-66.5283	-40.1306	-65.3076	-40.0696	-59.2041	-40.1306	-93.3838	-40.0696	-114.746	-40.1001	-100.708	-40.1001	-109.253	-40.1001	-102.539	-40.1001	-82.3975	-40.1001	-102.539	-40.1001	-122.681	-40.1001	-89.1113	-40.1306	-113.525	-40.1001	-104.98	-40.0696	-118.408	-40.0696	-115.967	-40.0696	-130.005	-40.1001	-142.212	-40.1001	-147.095	-40.0696
0.3445	-79.3457	-40.1001	-62.8662	-40.1001	-64.6973	-40.1001	-106.201	-40.1001	-110.474	-40.1306	-111.084	-40.1001	-97.6563	-40.1306	-87.2803	-40.1001	-80.5664	-40.0696	-100.098	-40.1001	-110.474	-40.1001	-106.201	-40.1001	-91.5527	-40.1001	-125.732	-40.1001	-119.019	-40.1001	-115.967	-40.0696	-121.46	-40.0696	-143.433	-40.0696	-149.536	-40.1001
0.345	-70.1904	-40.1001	-59.2041	-40.0696	-65.918	-40.1001	-83.6182	-40.1001	-103.149	-40.1001	-110.474	-40.1306	-96.4355	-40.0696	-91.5527	-40.1001	-79.3457	-40.0696	-95.8252	-40.1306	-108.032	-40.1001	-95.8252	-40.0696	-114.746	-40.1306	-106.201	-40.1001	-125.122	-40.0696	-109.253	-40.0696	-112.305	-40.1001	-125.122	-40.1001	-155.64	-40.1001
0.3455	-76.9043	-40.0696	-56.7627	-40.0696	-72.6318	-40.0696	-90.332	-40.1001	-98.2666	-40.1306	-98.877	-40.1001	-91.5527	-40.1001	-98.877	-40.1306	-82.3975	-40.1001	-107.422	-40.0696	-114.746	-40.1001	-112.915	-40.1001	-106.201	-40.1001	-119.019	-40.1001	-111.694	-40.1001	-112.915	-40.0696	-127.563	-40.1001	-140.991	-40.1001	-151.978	-40.0696
0.346	-73.8525	-40.1001	-67.749	-40.1001	-78.125	-40.1001	-80.5664	-40.1001	-97.6563	-40.1001	-117.188	-40.1001	-113.525	-40.1001	-96.4355	-40.1001	-94.6045	-40.1001	-105.591	-40.0696	-111.694	-40.0696	-104.37	-40.1306	-105.591	-40.1306	-120.85	-40.0696	-119.019	-40.1001	-115.356	-40.1001	-136.719	-40.1001	-114.136	-40.1001	-163.574	-40.1306
0.3465	-70.8008	-40.1306	-57.9834	-40.1001	-73.2422	-40.0696	-101.318	-40.1001	-90.332	-40.1001	-97.0459	-40.1306	-109.863	-40.1001	-89.7217	-40.1306	-88.501	-40.1001	-93.9941	-40.0696	-108.643	-40.1001	-79.3457	-40.0696	-103.149	-40.1306	-124.512	-40.1306	-112.915	-40.0696	-108.032	-40.1001	-134.277	-40.1306	-133.057	-40.1001	-154.419	-40.1001
0.347	-73.2422	-40.1001	-60.4248	-40.1306	-73.8525	-40.1306	-92.1631	-40.1306	-124.512	-40.0696	-100.098	-40.1001	-97.6563	-40.1306	-90.332	-40.1001	-79.3457	-40.1306	-95.2148	-40.1001	-98.877	-40.1306	-101.318	-40.1001	-105.591	-40.1001	-125.122	-40.1306	-104.98	-40.1001	-101.929	-40.0696	-127.563	-40.0696	-146.484	-40.0696	-147.095	-40.0696
0.3475	-65.918	-40.1001	-70.1904	-40.1001	-75.0732	-40.1001	-85.4492	-40.1001	-94.6045	-40.1001	-98.877	-40.0696	-104.37	-40.1306	-97.6563	-40.1001	-86.6699	-40.1001	-100.708	-40.1001	-116.577	-40.1001	-116.577	-40.1001	-120.85	-40.1001	-114.746	-40.1306	-120.85	-40.1001	-105.591	-40.1001	-128.784	-40.0696	-126.953	-40.1001	-148.926	-40.1001
0.348	-83.6182	-40.1001	-61.6455	-40.1001	-75.0732	-40.1001	-69.5801	-40.1001	-89.1113	-40.1001	-100.708	-40.1306	-111.694	-40.1306	-93.3838	-40.1001	-87.8906	-40.1001	-100.708	-40.1001	-109.253	-40.1001	-114.746	-40.1001	-106.201	-40.1306	-131.836	-40.1001	-125.122	-40.1001	-97.6563	-40.1001	-140.991	-40.1001	-121.46	-40.1001	-135.498	-40.1001
0.3485	-79.3457	-40.0696	-68.3594	-40.0696	-70.1904	-40.1001	-83.0078	-40.1001	-103.149	-40.1001	-82.3975	-40.0696	-120.239	-40.1001	-98.877	-40.1001	-89.1113	-40.1001	-104.37	-40.1306	-103.149	-40.1001	-117.798	-40.1001	-106.201	-40.1001	-122.07	-40.1001	-117.798	-40.0696	-94.6045	-40.1001	-135.498	-40.1306	-136.719	-40.1306	-156.25	-40.0696
0.349	-76.2939	-40.1306	-74.4629	-40.1306	-71.4111	-40.0696	-74.4629	-40.1001	-98.877	-40.0696	-98.2666	-40.1306	-105.591	-40.1306	-100.098	-40.1001	-89.1113	-40.0696	-92.1631	-40.1001	-100.098	-40.0696	-109.863	-40.1001	-94.6045	-40.1001	-142.212	-40.1001	-114.136	-40.1001	-108.643	-40.1001	-141.602	-40.0696	-130.615	-40.1001	-154.419	-40.1001
0.3495	-65.3076	-40.1001	-59.2041	-40.1001	-76.2939	-40.1001	-78.125	-40.1001	-98.2666	-40.1001	-96.4355	-40.1306	-115.356	-40.1001	-108.643	-40.0696	-106.812	-40.0696	-108.032	-40.1001	-112.915	-40.1001	-111.694	-40.1306	-122.07	-40.1001	-118.408	-40.1001	-113.525	-40.1306	-108.032	-40.1001	-153.198	-40.1001	-143.433	-40.1306	-135.498	-40.1001
0.35	-77.5146	-40.1001	-83.6182	-40.1001	-65.918	-40.1001	-92.1631	-40.1001	-81.7871	-40.1306	-104.98	-40.0696	-106.201	-40.1306	-99.4873	-40.1001	-100.098	-40.1001	-117.188	-40.1001	-106.812	-40.1001	-116.577	-40.1001	-112.915	-40.1306	-137.329	-40.1306	-123.901	-40.1306	-130.005	-40.1001	-140.991	-40.1306	-128.784	-40.1001	-157.471	-40.1001
0.3505	-84.8389	-40.1001	-76.9043	-40.1001	-72.0215	-40.1001	-86.0596	-40.1001	-94.6045	-40.1001	-85.4492	-40.1001	-111.694	-40.1001	-93.9941	-40.1001	-95.8252	-40.1001	-99.4873	-40.0696	-113.525	-40.1001	-106.812	-40.1001	-99.4873	-40.1306	-133.057	-40.1001	-111.694	-40.1001	-115.356	-40.1001	-140.991	-40.1001	-130.005	-40.1001	-141.602	-40.1306
0.351	-82.3975	-40.1001	-81.1768	-40.0696	-89.1113	-40.1001	-80.5664	-40.1001	-88.501	-40.1001	-106.812	-40.1001	-115.356	-40.1306	-93.9941	-40.1001	-79.9561	-40.1001	-95.8252	-40.0696	-103.76	-40.0696	-122.07	-40.1306	-125.732	-40.1001	-129.395	-40.1001	-108.032	-40.1001	-108.643	-40.1001	-141.602	-40.0696	-123.291	-40.1001	-144.043	-40.1001
0.3515	-76.2939	-40.1306	-83.6182	-40.1001	-62.2559	-40.0696	-79.3457	-40.1001	-98.877	-40.1001	-87.2803	-40.0696	-112.305	-40.1001	-104.98	-40.1001	-106.201	-40.1306	-103.76	-40.1001	-112.915	-40.1001	-119.019	-40.0696	-112.915	-40.1001	-133.057	-40.0696	-112.305	-40.1001	-107.422	-40.1001	-129.395	-40.1001	-136.719	-40.1306	-155.029	-40.0696
0.352	-81.7871	-40.1001	-74.4629	-40.1001	-73.2422	-40.1001	-97.0459	-40.0696	-108.032	-40.0696	-100.098	-40.1001	-97.6563	-40.1306	-99.4873	-40.1306	-87.2803	-40.1001	-109.253	-40.1001	-112.915	-40.1306	-97.6563	-40.1306	-117.798	-40.1001	-116.577	-40.1001	-115.967	-40.1001	-106.812	-40.1001	-142.212	-40.1001	-134.888	-40.1001	-147.705	-40.0696
0.3525	-76.2939	-40.1001	-76.2939	-40.1001	-70.8008	-40.1001	-78.7354	-40.1001	-105.591	-40.1001	-93.3838	-40.1001	-95.8252	-40.1306	-117.798	-40.1001	-98.877	-40.1001	-101.318	-40.1306	-109.863	-40.1001	-97.0459	-40.1001	-111.694	-40.0696	-126.953	-40.1001	-117.798	-40.1001	-136.108	-40.0696	-139.771	-40.1001	-136.108	-40.1001	-151.978	-40.1306
0.353	-71.4111	-40.1001	-81.1768	-40.0696	-73.8525	-40.1001	-100.098	-40.1001	-92.7734	-40.1001	-90.332	-40.1001	-110.474	-40.1001	-117.798	-40.1001	-95.2148	-40.1001	-114.746	-40.1001	-112.915	-40.1001	-101.318	-40.1001	-95.2148	-40.1001	-122.681	-40.1001	-127.563	-40.1001	-121.46	-40.0696	-140.381	-40.1001	-118.408	-40.1306	-131.226	-40.0696
0.3535	-65.3076	-40.0696	-78.125	-40.1001	-82.3975	-40.1001	-93.3838	-40.0696	-92.1631	-40.1001	-82.3975	-40.1001	-91.5527	-40.0696	-103.76	-40.1001	-105.591	-40.1001	-106.812	-40.1001	-112.305	-40.1001	-107.422	-40.1001	-100.098	-40.1306	-117.188	-40.1001	-128.174	-40.1001	-117.188	-40.1001	-147.705	-40.1306	-129.395	-40.1001	-147.705	-40.1306
0.354	-71.4111	-40.1001	-72.0215	-40.1306	-78.7354	-40.1001	-82.3975	-40.1306	-84.2285	-40.1001	-83.6182	-40.1001	-108.643	-40.1001	-100.708	-40.1001	-106.201	-40.1001	-105.591	-40.0696	-111.084	-40.0696	-117.798	-40.1306	-93.9941	-40.1001	-112.915	-40.1306	-115.967	-40.1001	-115.356	-40.0696	-150.146	-40.0696	-131.226	-40.1001	-177.002	-40.1001
0.3545	-72.0215	-40.1001	-81.1768	-40.1001	-75.0732	-40.1001	-84.2285	-40.1001	-79.9561	-40.1001	-88.501	-40.1001	-95.2148	-40.1001	-98.2666	-40.1306	-97.0459	-40.1001	-104.37	-40.1001	-106.812	-40.1001	-93.9941	-40.0696	-109.253	-40.1001	-122.07	-40.1001	-102.539	-40.1306	-120.239	-40.1001	-141.602	-40.1306	-122.07	-40.1001	-178.223	-40.1306
0.355	-66.5283	-40.1001	-67.1387	-40.1001	-75.0732	-40.1001	-79.9561	-40.1001	-91.5527	-40.0391	-84.8389	-40.1001	-87.8906	-40.1001	-99.4873	-40.1306	-91.5527	-40.1001	-103.149	-40.0696	-108.643	-40.1001	-98.877	-40.1001	-88.501	-40.1306	-120.239	-40.1001	-105.591	-40.1001	-120.239	-40.1001	-151.978	-40.1001	-147.705	-40.1001	-155.64	-40.1001
0.3555	-73.2422	-40.1001	-67.749	-40.1001	-73.8525	-40.1001	-78.125	-40.1001	-120.239	-40.0696	-77.5146	-40.1001	-93.9941	-40.1306	-94.6045	-40.1001	-101.929	-40.1001	-93.9941	-40.0696	-104.37	-40.1001	-105.591	-40.1001	-114.746	-40.1001	-116.577	-40.1001	-129.395	-40.0696	-126.343	-40.1001	-158.691	-40.1001	-136.108	-40.1001	-172.729	-40.1306
0.356	-71.4111	-40.1001	-78.7354	-40.1001	-80.5664	-40.1001	-101.318	-40.0696	-95.8252	-40.1001	-88.501	-40.0696	-99.4873	-40.1001	-84.2285	-40.1001	-98.2666	-40.1001	-103.149	-40.1306	-111.694	-40.1001	-93.3838	-40.0696	-92.1631	-40.1001	-112.915	-40.0696	-125.732	-40.1001	-134.277	-40.0696	-137.939	-40.1001	-139.771	-40.1001	-142.212	-40.1001
0.3565	-65.918	-40.1001	-70.1904	-40.1306	-75.0732	-40.1001	-86.0596	-40.1001	-86.6699	-40.1001	-98.877	-40.0696	-99.4873	-40.1001	-96.4355	-40.0696	-98.877	-40.1001	-114.136	-40.1306	-106.812	-40.1001	-106.201	-40.1001	-100.098	-40.1306	-132.446	-40.1001	-119.629	-40.1001	-121.46	-40.0696	-125.122	-40.0696	-142.212	-40.1001	-153.809	-40.0696
0.357	-70.1904	-40.1001	-82.3975	-40.1306	-78.7354	-40.1001	-97.6563	-40.1306	-93.3838	-40.1001	-86.6699	-40.1001	-83.0078	-40.1001	-99.4873	-40.1001	-91.5527	-40.1001	-98.877	-40.1001	-131.836	-40.0696	-90.332	-40.1001	-92.1631	-40.1001	-112.915	-40.1001	-125.732	-40.1001	-133.057	-40.0696	-125.732	-40.0696	-128.174	-40.1001	-134.888	-40.1306
0.3575	-65.918	-40.1001	-65.3076	-40.1001	-81.7871	-40.1001	-104.98	-40.1001	-98.2666	-40.1001	-106.812	-40.0696	-95.2148	-40.1001	-93.3838	-40.0696	-80.5664	-40.0696	-112.305	-40.0696	-115.967	-40.1001	-88.501	-40.1001	-96.4355	-40.1001	-97.6563	-40.0696	-114.746	-40.1306	-122.681	-40.1001	-134.888	-40.1001	-138.55	-40.1306	-151.367	-40.1001
0.358	-62.2559	-40.1001	-76.9043	-40.0696	-77.5146	-40.1306	-86.0596	-40.1001	-91.5527	-40.1001	-100.708	-40.1001	-100.708	-40.1001	-90.9424	-40.1306	-101.929	-40.1001	-104.98	-40.1001	-111.084	-40.1001	-92.1631	-40.1001	-90.9424	-40.1001	-93.3838	-40.1001	-112.305	-40.1001	-125.122	-40.1001	-127.563	-40.1001	-122.07	-40.1001	-152.588	-40.0696
0.3585	-84.8389	-40.0696	-74.4629	-40.1001	-68.3594	-40.1306	-89.1113	-40.1001	-86.0596	-40.1001	-86.0596	-40.1001	-89.7217	-40.1306	-95.2148	-40.1001	-92.7734	-40.1001	-106.812	-40.0696	-111.694	-40.1001	-116.577	-40.0696	-101.318	-40.0696	-106.201	-40.1001	-116.577	-40.1001	-107.422	-40.1001	-137.329	-40.1001	-133.057	-40.1001	-161.133	-40.1001
0.359	-86.6699	-40.1001	-78.7354	-40.1001	-84.2285	-40.1001	-94.6045	-40.1001	-108.643	-40.1001	-89.1113	-40.1001	-96.4355	-40.1001	-77.5146	-40.1001	-103.149	-40.1001	-122.07	-40.1001	-122.07	-40.1306	-119.019	-40.1001	-106.812	-40.1001	-108.032	-40.1001	-112.915	-40.1001	-119.629	-40.1306	-165.405	-40.1001	-136.108	-40.1001	-150.757	-40.1001
0.3595	-77.5146	-40.1001	-70.8008	-40.1001	-76.9043	-40.1001	-95.8252	-40.1001	-104.98	-40.0696	-89.7217	-40.1001	-93.9941	-40.1001	-84.2285	-40.1001	-100.708	-40.1306	-113.525	-40.1306	-112.915	-40.1001	-114.746	-40.1001	-93.9941	-40.1001	-122.07	-40.1001	-115.356	-40.1001	-117.798	-40.0696	-166.016	-40.1001	-123.291	-40.1001	-140.381	-40.0696
0.36	-78.7354	-40.1001	-78.7354	-40.1001	-58.5938	-40.1001	-97.6563	-40.1001	-123.901	-40.1001	-98.877	-40.1001	-89.1113	-40.1001	-98.2666	-40.1001	-83.6182	-40.1306	-108.643	-40.1001	-114.136	-40.1001	-123.901	-40.1001	-95.8252	-40.1001	-118.408	-40.1001	-112.915	-40.0696	-114.136	-40.1001	-145.264	-40.0696	-118.408	-40.0696	-159.302	-40.1001
0.3605	-79.9561	-40.1001	-61.6455	-40.0696	-68.3594	-40.1001	-95.8252	-40.1001	-114.746	-40.1306	-99.4873	-40.1306	-88.501	-40.0696	-90.332	-40.1001	-79.9561	-40.1001	-125.732	-40.1306	-115.967	-40.1001	-114.136	-40.1001	-92.7734	-40.1001	-110.474	-40.1001	-115.356	-40.0696	-120.239	-40.0696	-135.498	-40.1001	-122.681	-40.1306	-146.484	-40.1001
0.361	-70.1904	-40.1001	-57.9834	-40.1001	-83.6182	-40.1001	-96.4355	-40.1001	-106.201	-40.1306	-109.253	-40.1001	-85.4492	-40.1001	-84.8389	-40.1001	-87.2803	-40.1001	-109.863	-40.1306	-114.136	-40.1001	-112.305	-40.1001	-103.149	-40.1001	-134.277	-40.1001	-118.408	-40.1001	-106.201	-40.0696	-136.108	-40.1001	-125.122	-40.1001	-145.264	-40.1001
0.3615	-76.9043	-40.0696	-76.9043	-40.1306	-60.4248	-40.1306	-89.7217	-40.1001	-87.8906	-40.1001	-98.877	-40.1306	-105.591	-40.1001	-108.643	-40.0696	-89.7217	-40.0696	-106.812	-40.1001	-119.629	-40.1001	-109.253	-40.1001	-101.318	-40.1306	-126.343	-40.0696	-114.136	-40.1001	-107.422	-40.0696	-135.498	-40.1001	-132.446	-40.0696	-155.64	-40.1001
0.362	-51.2695	-40.1001	-63.4766	-40.1001	-67.1387	-40.1306	-77.5146	-40.1306	-98.2666	-40.1001	-110.474	-40.1306	-108.643	-40.1001	-95.2148	-40.1001	-81.7871	-40.0696	-103.149	-40.1001	-111.694	-40.0696	-123.291	-40.1001	-88.501	-40.0696	-109.253	-40.1001	-125.732	-40.1001	-111.694	-40.1001	-136.108	-40.1001	-127.563	-40.0696	-147.095	-40.1001
0.3625	-75.0732	-40.1001	-60.4248	-40.1001	-68.9697	-40.1001	-84.8389	-40.0696	-94.6045	-40.0696	-105.591	-40.0696	-97.6563	-40.1001	-89.1113	-40.1306	-90.332	-40.1001	-103.76	-40.1001	-114.746	-40.1306	-106.812	-40.1001	-103.76	-40.1001	-111.084	-40.1001	-123.901	-40.1306	-106.812	-40.0696	-123.901	-40.1001	-119.019	-40.0696	-143.433	-40.1001
0.363	-79.9561	-40.1001	-62.8662	-40.0696	-67.749	-40.1001	-94.6045	-40.1001	-96.4355	-40.1001	-113.525	-40.1001	-90.9424	-40.0696	-84.8389	-40.1001	-87.8906	-40.0696	-100.098	-40.1001	-109.863	-40.1001	-119.019	-40.0696	-101.318	-40.1001	-108.032	-40.0696	-110.474	-40.1306	-114.746	-40.1001	-137.329	-40.1001	-126.953	-40.0696	-142.822	-40.1001
0.3635	-72.6318	-40.0696	-72.0215	-40.1001	-59.8145	-40.0696	-92.7734	-40.1001	-89.1113	-40.0696	-101.929	-40.1001	-97.0459	-40.1306	-92.1631	-40.1306	-89.7217	-40.1306	-101.318	-40.0391	-122.07	-40.1001	-125.732	-40.1611	-111.694	-40.0696	-110.474	-40.1001	-113.525	-40.1001	-122.681	-40.1001	-136.719	-40.0696	-131.836	-40.1001	-148.315	-40.1001
0.364	-77.5146	-40.1001	-62.8662	-40.1001	-57.373	-40.1306	-88.501	-40.1001	-101.318	-40.1001	-95.8252	-40.1001	-98.2666	-40.1001	-103.76	-40.1001	-96.4355	-40.1306	-90.9424	-40.1001	-114.136	-40.1001	-124.512	-40.1001	-106.201	-40.0696	-128.784	-40.1001	-121.46	-40.1001	-113.525	-40.1001	-133.057	-40.1306	-111.694	-40.1306	-137.329	-40.1001
0.3645	-71.4111	-40.1306	-59.2041	-40.1001	-73.8525	-40.0696	-95.2148	-40.1001	-101.929	-40.1001	-92.7734	-40.1001	-111.084	-40.1001	-71.4111	-40.1001	-92.1631	-40.1001	-114.136	-40.1001	-119.019	-40.1306	-126.343	-40.1001	-108.643	-40.0696	-122.07	-40.1001	-120.239	-40.1001	-122.07	-40.1001	-146.484	-40.0696	-119.019	-40.0696	-139.16	-40.1001
0.365	-80.5664	-40.1306	-70.1904	-40.1001	-66.5283	-40.1306	-87.8906	-40.1001	-107.422	-40.1001	-99.4873	-40.1306	-104.98	-40.1001	-81.1768	-40.1001	-83.0078	-40.0696	-106.201	-40.1001	-122.07	-40.1306	-128.174	-40.1001	-118.408	-40.1001	-130.615	-40.0696	-120.85	-40.0696	-115.967	-40.1001	-146.484	-40.1001	-110.474	-40.0696	-133.057	-40.1001
0.3655	-78.7354	-40.1306	-56.1523	-40.0696	-64.0869	-40.1306	-79.3457	-40.1001	-99.4873	-40.1001	-96.4355	-40.1306	-111.084	-40.0696	-99.4873	-40.1001	-85.4492	-40.1001	-109.863	-40.1306	-121.46	-40.1001	-128.174	-40.1001	-105.591	-40.1001	-125.732	-40.1001	-115.967	-40.0696	-112.915	-40.1001	-148.315	-40.1001	-125.122	-40.1306	-135.498	-40.1001
0.366	-92.7734	-40.0696	-65.918	-40.1001	-59.2041	-40.1001	-84.2285	-40.1306	-95.2148	-40.1001	-96.4355	-40.1001	-115.967	-40.1001	-100.708	-40.1001	-79.9561	-40.1001	-106.201	-40.0696	-124.512	-40.1001	-120.85	-40.0696	-108.643	-40.1001	-120.85	-40.1001	-154.419	-40.1001	-97.0459	-40.1001	-159.302	-40.1001	-119.629	-40.0696	-140.991	-40.1001
0.3665	-77.5146	-40.1306	-62.2559	-40.1001	-59.8145	-40.1001	-89.1113	-40.1001	-95.2148	-40.1001	-93.3838	-40.0696	-109.253	-40.1306	-92.7734	-40.1001	-85.4492	-40.0696	-117.798	-40.0696	-109.253	-40.1001	-112.305	-40.1001	-109.253	-40.1001	-131.226	-40.0696	-136.108	-40.1001	-101.318	-40.1001	-147.705	-40.1001	-112.915	-40.1001	-133.667	-40.0696
0.367	-78.7354	-40.1001	-72.0215	-40.1306	-62.2559	-40.1001	-79.9561	-40.1001	-108.032	-40.1001	-101.929	-40.0696	-102.539	-40.1306	-99.4873	-40.1001	-73.2422	-40.1001	-109.863	-40.1001	-97.6563	-40.1001	-119.629	-40.1001	-100.708	-40.0696	-123.901	-40.1001	-128.784	-40.1001	-109.863	-40.1306	-137.939	-40.1001	-131.226	-40.1001	-128.784	-40.0696
0.3675	-85.4492	-40.1001	-67.1387	-40.1001	-58.5938	-40.0696	-88.501	-40.1001	-84.2285	-40.1001	-109.863	-40.1001	-95.8252	-40.1001	-110.474	-40.1001	-79.9561	-40.1001	-116.577	-40.0696	-115.356	-40.1001	-132.446	-40.1001	-114.746	-40.0696	-131.226	-40.1001	-155.64	-40.0696	-105.591	-40.1001	-127.563	-40.0696	-119.019	-40.1001	-148.315	-40.0696
0.368	-83.6182	-40.1001	-77.5146	-40.1001	-62.8662	-40.0696	-74.4629	-40.0696	-90.332	-40.0696	-100.708	-40.1001	-115.356	-40.1001	-115.356	-40.1001	-76.2939	-40.1001	-92.7734	-40.1306	-123.901	-40.1001	-119.629	-40.1001	-120.239	-40.1001	-150.757	-40.1001	-120.239	-40.0696	-98.877	-40.1001	-141.602	-40.1001	-130.005	-40.1001	-142.212	-40.1001
0.3685	-86.6699	-40.1001	-81.7871	-40.1001	-71.4111	-40.0696	-84.8389	-40.1001	-93.9941	-40.1001	-76.2939	-40.1001	-106.812	-40.1001	-92.1631	-40.1001	-84.2285	-40.0696	-123.291	-40.1001	-98.877	-40.1001	-122.681	-40.1001	-104.37	-40.1306	-126.953	-40.1001	-130.005	-40.1001	-106.812	-40.1001	-135.498	-40.0696	-112.305	-40.1001	-130.615	-40.1001
0.369	-86.6699	-40.1001	-86.6699	-40.1001	-72.6318	-40.1001	-73.2422	-40.1306	-90.9424	-40.1001	-98.877	-40.0696	-92.1631	-40.1306	-98.2666	-40.0696	-82.3975	-40.0696	-136.719	-40.0696	-109.863	-40.1001	-122.07	-40.1306	-103.149	-40.1306	-139.16	-40.1001	-117.188	-40.1001	-115.356	-40.1001	-154.419	-40.1001	-109.253	-40.1001	-134.277	-40.1001
0.3695	-80.5664	-40.1001	-72.6318	-40.1001	-56.1523	-40.0696	-94.6045	-40.1001	-85.4492	-40.1001	-94.6045	-40.1001	-95.8252	-40.1001	-112.305	-40.1001	-90.332	-40.1001	-115.356	-40.0696	-115.967	-40.1001	-109.253	-40.1001	-106.201	-40.1306	-117.188	-40.1001	-104.98	-40.1001	-109.253	-40.0696	-158.691	-40.1306	-123.291	-40.0696	-128.784	-40.1001
0.37	-71.4111	-40.1001	-78.7354	-40.1001	-61.6455	-40.1001	-92.7734	-40.1001	-91.5527	-40.1001	-90.9424	-40.1001	-98.877	-40.1001	-110.474	-40.1001	-89.7217	-40.0696	-125.732	-40.1001	-109.863	-40.1001	-108.643	-40.1001	-107.422	-40.1001	-114.136	-40.1001	-125.122	-40.1001	-103.76	-40.1306	-125.732	-40.1306	-104.98	-40.0696	-120.239	-40.1306
0.3705	-80.5664	-40.1306	-75.0732	-40.1001	-65.3076	-40.1001	-85.4492	-40.0696	-92.1631	-40.1001	-86.0596	-40.1001	-104.98	-40.1306	-105.591	-40.1306	-92.1631	-40.1001	-112.305	-40.0696	-117.798	-40.0696	-98.2666	-40.1001	-109.863	-40.1306	-138.55	-40.1001	-133.667	-40.1001	-108.643	-40.1306	-140.381	-40.1306	-120.85	-40.0696	-136.719	-40.1001
0.371	-77.5146	-40.1001	-84.2285	-40.1306	-84.8389	-40.1001	-82.3975	-40.1001	-89.7217	-40.0696	-105.591	-40.1001	-100.708	-40.1001	-89.7217	-40.1306	-103.76	-40.1001	-98.2666	-40.0696	-107.422	-40.1001	-110.474	-40.0696	-122.681	-40.0696	-136.719	-40.0696	-139.771	-40.1001	-103.76	-40.1001	-159.302	-40.1001	-106.201	-40.1001	-131.226	-40.0696
0.3715	-78.7354	-40.1001	-78.7354	-40.1001	-68.3594	-40.1001	-89.7217	-40.1001	-89.7217	-40.1001	-93.3838	-40.0696	-86.6699	-40.1001	-99.4873	-40.0696	-96.4355	-40.1001	-127.563	-40.1001	-109.253	-40.1001	-104.37	-40.1001	-108.032	-40.0696	-140.381	-40.0696	-122.681	-40.0696	-108.032	-40.0696	-161.133	-40.1001	-120.239	-40.1001	-136.108	-40.0696
0.372	-76.9043	-40.1306	-93.9941	-40.1001	-73.8525	-40.1001	-93.9941	-40.1001	-98.877	-40.1001	-86.6699	-40.1001	-102.539	-40.1001	-90.9424	-40.0696	-107.422	-40.1001	-105.591	-40.1001	-114.746	-40.1306	-98.2666	-40.1001	-112.305	-40.1001	-128.174	-40.1001	-130.005	-40.1001	-109.863	-40.1001	-148.926	-40.1001	-119.019	-40.1001	-137.939	-40.0696
0.3725	-69.5801	-40.1001	-93.3838	-40.1306	-63.4766	-40.1001	-76.9043	-40.0696	-88.501	-40.1001	-106.201	-40.1001	-99.4873	-40.1001	-112.305	-40.1001	-90.332	-40.1001	-99.4873	-40.0696	-110.474	-40.1001	-114.136	-40.1001	-126.343	-40.1306	-145.874	-40.1001	-149.536	-40.0696	-104.98	-40.1001	-158.081	-40.1001	-135.498	-40.1306	-147.705	-40.1001
0.373	-72.6318	-40.0696	-72.6318	-40.1001	-75.6836	-40.1306	-94.6045	-40.0696	-101.929	-40.1001	-122.681	-40.0696	-92.7734	-40.1001	-106.812	-40.0696	-92.7734	-40.0696	-120.85	-40.1306	-109.253	-40.1001	-94.6045	-40.1001	-116.577	-40.0696	-136.108	-40.1001	-139.771	-40.1001	-119.019	-40.1001	-164.795	-40.0696	-125.122	-40.1001	-129.395	-40.1306
0.3735	-65.918	-40.0696	-72.6318	-40.1306	-81.1768	-40.1001	-89.7217	-40.1001	-94.6045	-40.1001	-91.5527	-40.0696	-94.6045	-40.0696	-121.46	-40.1001	-93.3838	-40.1001	-100.098	-40.1306	-121.46	-40.1306	-132.446	-40.1001	-101.318	-40.0696	-127.563	-40.1001	-123.901	-40.1306	-121.46	-40.1001	-166.626	-40.1001	-124.512	-40.1306	-129.395	-40.1001
0.374	-67.749	-40.1001	-81.7871	-40.1306	-82.3975	-40.1001	-82.3975	-40.1001	-108.032	-40.0696	-82.3975	-40.1306	-103.149	-40.1001	-104.37	-40.1306	-89.1113	-40.1001	-94.6045	-40.1001	-111.694	-40.1001	-110.474	-40.1001	-102.539	-40.1001	-137.329	-40.1306	-136.719	-40.1001	-107.422	-40.1306	-161.133	-40.1001	-120.85	-40.0696	-147.095	-40.1001
0.3745	-61.0352	-40.0696	-82.3975	-40.1001	-68.9697	-40.1306	-70.1904	-40.1306	-93.3838	-40.1306	-93.3838	-40.1001	-81.7871	-40.1306	-103.149	-40.1306	-89.1113	-40.1001	-106.812	-40.1001	-98.877	-40.1001	-111.694	-40.0696	-119.019	-40.0696	-136.108	-40.1001	-130.615	-40.1001	-115.356	-40.1001	-158.691	-40.1001	-100.708	-40.1001	-138.55	-40.1306
0.375	-71.4111	-40.1001	-67.749	-40.1306	-70.1904	-40.1001	-75.6836	-40.1001	-104.37	-40.1001	-94.6045	-40.1001	-112.305	-40.1001	-112.305	-40.1001	-95.8252	-40.1001	-108.643	-40.1001	-100.708	-40.1306	-95.2148	-40.1001	-115.967	-40.1001	-148.926	-40.1001	-130.005	-40.1001	-120.239	-40.1001	-150.757	-40.1001	-111.084	-40.1001	-123.901	-40.1001
0.3755	-45.166	-40.0696	-72.6318	-40.0696	-82.3975	-40.1001	-90.332	-40.1001	-103.149	-40.1001	-89.7217	-40.0696	-98.2666	-40.1001	-124.512	-40.1306	-92.1631	-40.1306	-100.098	-40.1001	-100.098	-40.1001	-113.525	-40.0696	-105.591	-40.1306	-143.433	-40.1001	-118.408	-40.1001	-134.277	-40.1001	-145.264	-40.1001	-119.629	-40.0696	-136.108	-40.0696
0.376	-78.125	-40.1001	-73.2422	-40.1001	-78.7354	-40.0696	-89.1113	-40.1001	-82.3975	-40.1001	-110.474	-40.0696	-81.7871	-40.1001	-86.0596	-40.1001	-84.2285	-40.0696	-106.812	-40.1306	-99.4873	-40.0696	-105.591	-40.1306	-108.643	-40.0696	-130.615	-40.0696	-111.694	-40.1001	-124.512	-40.1001	-145.874	-40.1001	-122.681	-40.0696	-143.433	-40.1306
0.3765	-76.2939	-40.1306	-71.4111	-40.1001	-77.5146	-40.1001	-100.708	-40.1001	-87.8906	-40.1001	-99.4873	-40.1001	-95.8252	-40.1001	-95.2148	-40.0696	-98.2666	-40.1001	-95.2148	-40.1306	-111.694	-40.1001	-99.4873	-40.1001	-110.474	-40.0696	-142.822	-40.1001	-133.667	-40.1306	-131.226	-40.0696	-157.471	-40.1001	-136.108	-40.1001	-148.315	-40.1001
0.377	-70.8008	-40.1001	-68.3594	-40.1001	-72.0215	-40.1001	-92.7734	-40.1001	-90.9424	-40.1001	-92.7734	-40.1001	-95.8252	-40.1001	-120.85	-40.0696	-104.98	-40.1001	-103.76	-40.1001	-127.563	-40.1001	-92.7734	-40.1306	-109.253	-40.1001	-147.705	-40.1001	-138.55	-40.0696	-133.057	-40.0696	-151.978	-40.1001	-119.019	-40.1001	-142.212	-40.1306
0.3775	-71.4111	-40.1001	-67.1387	-40.1001	-78.125	-40.1001	-95.8252	-40.1306	-111.084	-40.1001	-96.4355	-40.1001	-87.2803	-40.1306	-92.7734	-40.0696	-99.4873	-40.1001	-97.0459	-40.0696	-106.812	-40.1001	-99.4873	-40.1001	-106.812	-40.1001	-137.939	-40.1001	-146.484	-40.1001	-125.732	-40.1306	-170.898	-40.1001	-120.239	-40.1001	-145.264	-40.1306
0.378	-72.0215	-40.1001	-57.9834	-40.1001	-78.7354	-40.1306	-88.501	-40.1001	-92.7734	-40.1306	-109.863	-40.1001	-90.9424	-40.1001	-98.2666	-40.1001	-98.2666	-40.0696	-105.591	-40.1001	-115.356	-40.1001	-87.2803	-40.1001	-104.98	-40.1001	-121.46	-40.1001	-128.784	-40.1306	-126.953	-40.1001	-159.912	-40.1306	-127.563	-40.1306	-142.822	-40.1001
0.3785	-70.8008	-40.1001	-56.7627	-40.1001	-60.4248	-40.1001	-93.9941	-40.1001	-103.76	-40.1001	-97.0459	-40.1001	-83.6182	-40.0696	-88.501	-40.1306	-101.929	-40.1306	-101.318	-40.1001	-115.967	-40.1001	-98.877	-40.1306	-106.201	-40.1611	-140.991	-40.1306	-115.356	-40.1001	-137.329	-40.1001	-155.64	-40.1001	-123.901	-40.1306	-140.991	-40.1001
0.379	-70.1904	-40.1001	-62.8662	-40.1001	-73.8525	-40.1306	-106.812	-40.1001	-90.9424	-40.0696	-89.7217	-40.0696	-78.125	-40.1001	-100.708	-40.1306	-97.0459	-40.0696	-109.253	-40.1001	-130.615	-40.0696	-105.591	-40.1001	-109.863	-40.1001	-142.212	-40.1001	-127.563	-40.1001	-125.122	-40.1306	-169.678	-40.1001	-120.85	-40.0696	-152.588	-40.1001
0.3795	-67.1387	-40.1001	-59.8145	-40.0696	-68.3594	-40.1001	-98.2666	-40.1001	-106.812	-40.1001	-100.708	-40.1001	-87.8906	-40.1001	-86.6699	-40.1306	-97.6563	-40.1001	-114.136	-40.1001	-122.07	-40.1001	-109.863	-40.0696	-111.084	-40.1001	-134.277	-40.1001	-125.732	-40.1001	-125.122	-40.1001	-140.991	-40.1001	-122.681	-40.1001	-145.264	-40.1001
0.38	-85.4492	-40.0696	-63.4766	-40.1001	-70.8008	-40.1001	-83.6182	-40.1306	-101.318	-40.1001	-101.318	-40.0696	-94.6045	-40.1001	-93.9941	-40.1306	-88.501	-40.1306	-97.0459	-40.0696	-119.019	-40.1001	-109.863	-40.1306	-115.356	-40.1001	-134.888	-40.1001	-133.667	-40.1001	-117.798	-40.0696	-147.705	-40.0696	-132.446	-40.1001	-140.381	-40.1001
0.3805	-72.6318	-40.0696	-49.4385	-40.1001	-73.8525	-40.0696	-94.6045	-40.1001	-95.2148	-40.1001	-100.098	-40.1001	-84.2285	-40.1001	-95.2148	-40.0696	-86.6699	-40.1306	-86.6699	-40.1001	-112.305	-40.1001	-111.084	-40.1001	-95.8252	-40.1306	-142.212	-40.1001	-129.395	-40.1001	-138.55	-40.1001	-158.081	-40.0696	-123.901	-40.1001	-158.081	-40.1001
0.381	-72.6318	-40.1001	-65.3076	-40.1001	-75.6836	-40.1001	-87.2803	-40.1001	-109.863	-40.1001	-96.4355	-40.1306	-100.098	-40.1001	-90.9424	-40.1001	-92.1631	-40.1001	-102.539	-40.1306	-110.474	-40.1001	-103.76	-40.1001	-103.149	-40.0696	-149.536	-40.0696	-140.991	-40.1001	-104.37	-40.0696	-173.95	-40.1001	-122.681	-40.1306	-151.978	-40.1001
0.3815	-61.6455	-40.1001	-52.4902	-40.0696	-68.3594	-40.1001	-104.37	-40.1306	-114.746	-40.1001	-114.136	-40.0696	-109.253	-40.0696	-100.708	-40.1306	-89.1113	-40.1001	-108.032	-40.1001	-126.953	-40.1306	-101.929	-40.1001	-124.512	-40.1001	-145.264	-40.1306	-155.029	-40.1001	-118.408	-40.1001	-161.743	-40.1001	-125.122	-40.1001	-150.146	-40.1306
0.382	-67.1387	-40.1001	-70.8008	-40.1001	-65.918	-40.1001	-83.6182	-40.1001	-99.4873	-40.1001	-106.201	-40.1306	-97.6563	-40.1001	-91.5527	-40.0391	-83.0078	-40.0696	-101.929	-40.1001	-114.746	-40.0696	-106.201	-40.1001	-109.863	-40.1306	-145.264	-40.0696	-121.46	-40.1001	-129.395	-40.1001	-155.029	-40.1001	-114.136	-40.0696	-139.771	-40.0696
0.3825	-76.9043	-40.1001	-50.0488	-40.0391	-64.6973	-40.1001	-79.3457	-40.1001	-119.019	-40.1001	-109.863	-40.1306	-105.591	-40.1306	-78.7354	-40.1001	-87.2803	-40.0696	-103.76	-40.1001	-104.98	-40.1001	-106.201	-40.1001	-101.318	-40.1001	-145.874	-40.0696	-111.084	-40.0696	-118.408	-40.1306	-156.25	-40.1001	-129.395	-40.1001	-137.939	-40.1001
0.383	-76.2939	-40.1001	-68.3594	-40.0696	-67.749	-40.1001	-87.2803	-40.1001	-112.915	-40.1001	-102.539	-40.0696	-98.877	-40.1001	-99.4873	-40.1001	-84.2285	-40.1001	-101.929	-40.1001	-109.863	-40.1001	-122.07	-40.1001	-116.577	-40.0696	-142.822	-40.1001	-115.356	-40.1001	-120.85	-40.1001	-155.029	-40.1306	-114.136	-40.1001	-140.991	-40.0696
0.3835	-62.8662	-40.1001	-62.2559	-40.1001	-70.8008	-40.1001	-86.6699	-40.1001	-111.084	-40.1001	-102.539	-40.1001	-96.4355	-40.1001	-89.1113	-40.0696	-91.5527	-40.1001	-97.0459	-40.0696	-129.395	-40.1001	-106.201	-40.1001	-129.395	-40.1001	-131.836	-40.0696	-120.239	-40.1001	-141.602	-40.1001	-155.64	-40.1001	-119.629	-40.1001	-140.991	-40.0696
0.384	-59.2041	-40.1306	-67.1387	-40.1001	-80.5664	-40.1001	-84.8389	-40.1001	-112.305	-40.0696	-98.2666	-40.1001	-113.525	-40.0696	-92.7734	-40.1001	-86.6699	-40.0696	-99.4873	-40.1001	-123.291	-40.0696	-106.201	-40.1001	-121.46	-40.1001	-125.122	-40.1001	-121.46	-40.1001	-134.277	-40.1001	-148.926	-40.1001	-127.563	-40.1001	-137.939	-40.1001
0.3845	-68.3594	-40.1001	-58.5938	-40.1001	-76.2939	-40.0696	-87.8906	-40.1001	-109.253	-40.0696	-106.201	-40.1001	-95.2148	-40.1001	-73.2422	-40.1001	-95.8252	-40.1001	-108.643	-40.1306	-122.681	-40.1001	-106.812	-40.1306	-128.174	-40.1001	-130.005	-40.1001	-129.395	-40.1001	-114.136	-40.0391	-142.212	-40.1001	-143.433	-40.1306	-147.705	-40.1001
0.385	-77.5146	-40.1001	-61.0352	-40.1001	-53.1006	-40.1306	-89.1113	-40.1001	-108.643	-40.1001	-95.2148	-40.1001	-93.3838	-40.1001	-90.9424	-40.1001	-95.2148	-40.1306	-95.2148	-40.1001	-129.395	-40.0696	-109.863	-40.1306	-142.212	-40.1001	-131.226	-40.1001	-102.539	-40.0696	-98.877	-40.0696	-153.198	-40.1001	-131.836	-40.1001	-134.888	-40.1306
0.3855	-76.2939	-40.1306	-57.373	-40.0696	-68.9697	-40.1001	-85.4492	-40.1001	-89.1113	-40.1001	-87.2803	-40.1001	-100.098	-40.1001	-101.318	-40.1001	-100.098	-40.1001	-117.798	-40.1001	-103.76	-40.1001	-87.2803	-40.0696	-134.888	-40.1306	-128.174	-40.0696	-108.643	-40.0696	-115.356	-40.1001	-147.095	-40.1001	-133.057	-40.0696	-144.653	-40.1001
0.386	-76.9043	-40.1001	-62.8662	-40.1001	-59.8145	-40.1001	-80.5664	-40.1306	-87.2803	-40.1001	-101.929	-40.1306	-87.2803	-40.1001	-105.591	-40.1001	-92.7734	-40.1001	-93.3838	-40.0696	-106.201	-40.1306	-111.084	-40.1001	-127.563	-40.1001	-142.212	-40.1001	-114.746	-40.1001	-103.76	-40.1001	-148.315	-40.1001	-111.084	-40.1001	-155.029	-40.1001
0.3865	-73.8525	-40.1001	-56.1523	-40.1001	-75.0732	-40.1001	-81.1768	-40.0696	-107.422	-40.1001	-117.798	-40.1001	-93.3838	-40.0696	-95.8252	-40.1306	-80.5664	-40.1001	-106.201	-40.0696	-121.46	-40.0696	-101.929	-40.1001	-140.381	-40.1001	-164.185	-40.1001	-123.291	-40.0696	-102.539	-40.0696	-155.029	-40.1306	-117.798	-40.1001	-145.874	-40.1001
0.387	-80.5664	-40.1306	-65.918	-40.1001	-68.9697	-40.1001	-73.2422	-40.1001	-110.474	-40.1001	-109.863	-40.1001	-107.422	-40.1306	-101.929	-40.1306	-89.7217	-40.1001	-90.332	-40.1001	-115.356	-40.0696	-98.2666	-40.1306	-111.084	-40.1001	-153.809	-40.1001	-117.188	-40.1001	-115.356	-40.1001	-150.757	-40.1001	-120.239	-40.1001	-136.108	-40.1001
0.3875	-78.7354	-40.1306	-67.1387	-40.1001	-54.9316	-40.1001	-88.501	-40.1306	-101.318	-40.1001	-122.07	-40.0696	-108.032	-40.1001	-112.305	-40.1001	-90.332	-40.1306	-80.5664	-40.1001	-98.877	-40.1306	-88.501	-40.1001	-120.239	-40.1001	-146.484	-40.1306	-112.305	-40.1306	-117.188	-40.0696	-156.86	-40.0696	-106.812	-40.1001	-145.874	-40.1001
0.388	-81.7871	-40.0696	-51.2695	-40.1306	-62.2559	-40.1001	-73.2422	-40.1001	-87.8906	-40.1001	-103.76	-40.1001	-94.6045	-40.1001	-98.877	-40.1001	-93.3838	-40.1001	-86.6699	-40.1306	-111.694	-40.0696	-106.812	-40.1306	-125.122	-40.1001	-136.108	-40.1001	-125.122	-40.0696	-100.708	-40.1001	-154.419	-40.1001	-116.577	-40.1001	-136.719	-40.1306
0.3885	-76.2939	-40.1001	-61.6455	-40.0696	-54.9316	-40.1306	-92.1631	-40.1001	-89.1113	-40.1001	-94.6045	-40.1001	-101.929	-40.1001	-99.4873	-40.1001	-76.9043	-40.0696	-93.3838	-40.1001	-112.305	-40.0696	-101.318	-40.1001	-126.343	-40.1001	-124.512	-40.1001	-124.512	-40.1001	-113.525	-40.1001	-142.212	-40.1001	-112.915	-40.1001	-143.433	-40.1306
0.389	-77.5146	-40.1001	-66.5283	-40.1306	-63.4766	-40.1001	-92.1631	-40.1001	-93.9941	-40.1001	-108.032	-40.0696	-84.8389	-40.1001	-99.4873	-40.1001	-99.4873	-40.1001	-89.7217	-40.1001	-109.253	-40.0696	-108.032	-40.1001	-137.329	-40.1001	-114.746	-40.1306	-120.85	-40.1001	-140.381	-40.0696	-142.212	-40.1001	-112.305	-40.1001	-145.264	-40.1306
0.3895	-67.749	-40.0696	-78.125	-40.1001	-61.0352	-40.1001	-92.1631	-40.0696	-97.6563	-40.1306	-103.76	-40.1001	-106.201	-40.0696	-106.201	-40.1001	-93.9941	-40.0696	-86.0596	-40.1001	-109.253	-40.0696	-104.98	-40.1001	-135.498	-40.0696	-161.743	-40.1001	-111.694	-40.1001	-113.525	-40.1001	-141.602	-40.1001	-111.694	-40.0696	-173.95	-40.1001
0.39	-70.8008	-40.1001	-72.6318	-40.1306	-57.9834	-40.1001	-75.0732	-40.1001	-87.8906	-40.1306	-109.253	-40.1001	-86.6699	-40.1001	-136.719	-40.1001	-84.2285	-40.1001	-87.8906	-40.1001	-98.877	-40.1001	-97.6563	-40.1001	-117.798	-40.1306	-147.705	-40.1001	-112.915	-40.1001	-126.953	-40.1001	-141.602	-40.1001	-125.732	-40.1001	-152.588	-40.1001
0.3905	-82.3975	-40.1306	-66.5283	-40.1001	-65.918	-40.1001	-83.6182	-40.1001	-88.501	-40.1001	-108.643	-40.1001	-95.8252	-40.1001	-124.512	-40.0696	-92.7734	-40.1001	-97.6563	-40.1306	-98.877	-40.0696	-92.1631	-40.1001	-108.643	-40.1001	-170.898	-40.1001	-111.084	-40.1001	-106.812	-40.1001	-139.771	-40.1001	-125.122	-40.0696	-156.25	-40.1001
0.391	-76.9043	-40.1001	-65.918	-40.1001	-74.4629	-40.1306	-86.6699	-40.1001	-87.2803	-40.1001	-92.1631	-40.1001	-87.2803	-40.1306	-123.291	-40.1306	-100.708	-40.1001	-87.2803	-40.0696	-100.708	-40.1001	-93.9941	-40.1001	-113.525	-40.0696	-164.185	-40.1001	-113.525	-40.1001	-102.539	-40.1001	-155.64	-40.1001	-123.291	-40.1001	-147.705	-40.1001
0.3915	-78.7354	-40.1306	-75.0732	-40.1001	-70.1904	-40.1001	-82.3975	-40.1001	-97.6563	-40.0696	-108.643	-40.1306	-104.98	-40.1001	-118.408	-40.1001	-100.098	-40.1001	-103.149	-40.1001	-104.98	-40.1001	-99.4873	-40.1306	-118.408	-40.1001	-155.64	-40.1001	-117.188	-40.0696	-119.629	-40.1306	-147.095	-40.1001	-127.563	-40.0696	-148.926	-40.1001
0.392	-78.7354	-40.1001	-65.918	-40.1001	-75.6836	-40.1001	-87.8906	-40.1001	-95.8252	-40.1306	-121.46	-40.0696	-90.332	-40.1001	-109.863	-40.1001	-98.2666	-40.1001	-95.8252	-40.1306	-109.253	-40.1306	-89.7217	-40.1001	-105.591	-40.0696	-151.978	-40.0391	-112.305	-40.1001	-112.915	-40.1001	-139.771	-40.1001	-130.005	-40.1306	-145.874	-40.1001
0.3925	-78.125	-40.1306	-60.4248	-40.1001	-76.2939	-40.1001	-91.5527	-40.1001	-78.125	-40.1001	-104.37	-40.1001	-92.1631	-40.1001	-110.474	-40.1001	-105.591	-40.1001	-100.708	-40.0696	-115.356	-40.0696	-112.305	-40.1306	-127.563	-40.1001	-143.433	-40.1001	-117.798	-40.0696	-133.057	-40.0696	-154.419	-40.1001	-122.681	-40.1306	-158.081	-40.1001
0.393	-74.4629	-40.1001	-69.5801	-40.1001	-72.0215	-40.0696	-75.6836	-40.1001	-96.4355	-40.1001	-99.4873	-40.1001	-96.4355	-40.1001	-102.539	-40.0696	-93.9941	-40.1001	-112.915	-40.0696	-113.525	-40.1001	-110.474	-40.1306	-111.084	-40.1001	-129.395	-40.1001	-109.253	-40.0696	-127.563	-40.1001	-162.354	-40.0696	-119.629	-40.1306	-161.743	-40.1001
0.3935	-77.5146	-40.1001	-60.4248	-40.1001	-81.7871	-40.1001	-92.7734	-40.1306	-83.0078	-40.1001	-86.0596	-40.1001	-88.501	-40.1001	-117.798	-40.1001	-94.6045	-40.1001	-100.098	-40.1001	-109.253	-40.0696	-97.6563	-40.0696	-112.915	-40.1001	-147.095	-40.0696	-120.85	-40.1306	-119.019	-40.1001	-155.029	-40.1001	-123.291	-40.1001	-143.433	-40.1306
0.394	-75.0732	-40.1001	-68.3594	-40.1001	-79.9561	-40.0696	-89.7217	-40.1001	-96.4355	-40.1001	-87.8906	-40.1001	-90.9424	-40.1001	-128.174	-40.1001	-102.539	-40.1001	-90.9424	-40.1001	-106.201	-40.0696	-90.332	-40.1001	-128.174	-40.1001	-136.108	-40.1306	-117.798	-40.0696	-125.122	-40.1001	-148.926	-40.1001	-118.408	-40.1001	-156.25	-40.1306
0.3945	-60.4248	-40.1001	-69.5801	-40.1306	-73.2422	-40.1001	-73.2422	-40.1001	-89.7217	-40.1306	-85.4492	-40.1306	-102.539	-40.0696	-119.629	-40.0696	-98.2666	-40.1001	-98.2666	-40.0696	-103.76	-40.0696	-73.2422	-40.1001	-143.433	-40.1001	-131.226	-40.1306	-124.512	-40.1306	-125.122	-40.1306	-144.043	-40.1001	-114.136	-40.1001	-162.354	-40.0391
0.395	-61.6455	-40.1306	-67.1387	-40.1306	-84.8389	-40.1001	-70.1904	-40.1306	-91.5527	-40.1001	-89.7217	-40.1306	-88.501	-40.1306	-115.356	-40.1001	-104.98	-40.1306	-115.356	-40.1001	-102.539	-40.0696	-83.6182	-40.0696	-114.746	-40.1001	-140.991	-40.1306	-123.901	-40.1306	-120.85	-40.1001	-159.302	-40.1001	-119.019	-40.1001	-139.771	-40.0696
0.3955	-73.8525	-40.1001	-75.6836	-40.1001	-73.2422	-40.1001	-71.4111	-40.1001	-110.474	-40.1001	-89.7217	-40.0696	-86.6699	-40.1306	-123.291	-40.1001	-100.098	-40.1306	-117.188	-40.1001	-115.356	-40.1001	-102.539	-40.0696	-104.37	-40.0696	-128.784	-40.1001	-119.019	-40.1001	-137.329	-40.0696	-147.095	-40.0696	-120.85	-40.1001	-161.133	-40.1001
0.396	-73.2422	-40.1001	-82.3975	-40.1001	-76.9043	-40.0696	-90.332	-40.0696	-95.2148	-40.1001	-95.2148	-40.1001	-92.1631	-40.1001	-98.877	-40.1001	-91.5527	-40.1001	-95.2148	-40.1306	-112.915	-40.1001	-108.032	-40.1001	-108.032	-40.1001	-141.602	-40.1001	-105.591	-40.0696	-138.55	-40.1306	-161.133	-40.0696	-136.719	-40.1001	-160.522	-40.0696
0.3965	-78.125	-40.1306	-79.3457	-40.1001	-65.918	-40.1001	-103.149	-40.1001	-99.4873	-40.1001	-101.318	-40.1306	-88.501	-40.1001	-98.2666	-40.1001	-99.4873	-40.1001	-106.812	-40.1001	-113.525	-40.1001	-111.694	-40.1001	-128.784	-40.1001	-142.212	-40.0696	-89.1113	-40.1001	-139.16	-40.1001	-153.809	-40.1306	-130.615	-40.1001	-156.86	-40.1001
0.397	-76.2939	-40.1306	-69.5801	-40.1001	-83.0078	-40.1001	-95.2148	-40.1001	-90.332	-40.1001	-93.9941	-40.1001	-94.6045	-40.1001	-112.915	-40.1001	-110.474	-40.1001	-113.525	-40.1001	-120.239	-40.1001	-100.708	-40.1001	-122.07	-40.0696	-130.005	-40.1001	-108.643	-40.1001	-126.343	-40.1001	-169.067	-40.1001	-138.55	-40.1001	-155.029	-40.1001
0.3975	-56.7627	-40.1001	-85.4492	-40.1001	-71.4111	-40.1001	-92.7734	-40.1001	-85.4492	-40.1001	-94.6045	-40.1001	-91.5527	-40.0696	-100.098	-40.1001	-103.149	-40.1001	-95.8252	-40.1001	-122.07	-40.1001	-83.6182	-40.1001	-104.98	-40.1001	-112.305	-40.1001	-103.76	-40.0696	-134.888	-40.1001	-167.847	-40.1001	-151.367	-40.1001	-175.781	-40.0696
0.398	-82.3975	-40.1001	-73.8525	-40.1001	-84.2285	-40.1001	-100.098	-40.1001	-90.332	-40.1001	-117.188	-40.1001	-97.6563	-40.1001	-96.4355	-40.1001	-111.084	-40.1001	-117.188	-40.1001	-109.253	-40.1001	-86.6699	-40.1001	-107.422	-40.1001	-136.108	-40.0696	-111.084	-40.1001	-114.746	-40.1001	-148.926	-40.1001	-142.212	-40.1001	-162.964	-40.1001
0.3985	-75.6836	-40.1306	-78.125	-40.1001	-74.4629	-40.1001	-98.2666	-40.1001	-98.2666	-40.0696	-90.9424	-40.1001	-82.3975	-40.0696	-106.201	-40.1306	-99.4873	-40.1001	-109.863	-40.1001	-124.512	-40.0696	-91.5527	-40.1001	-95.2148	-40.1001	-148.315	-40.1001	-116.577	-40.1306	-104.98	-40.0696	-170.898	-40.1001	-135.498	-40.0696	-185.547	-40.1001
0.399	-76.2939	-40.1001	-70.1904	-40.0696	-69.5801	-40.1001	-94.6045	-40.0696	-103.76	-40.1001	-101.318	-40.0696	-103.149	-40.0696	-97.0459	-40.1001	-113.525	-40.1306	-106.812	-40.1001	-115.967	-40.1306	-109.253	-40.1001	-88.501	-40.1001	-139.771	-40.1001	-107.422	-40.0696	-119.629	-40.1001	-174.561	-40.1001	-123.291	-40.1306	-172.119	-40.0696
0.3995	-61.0352	-40.1001	-62.2559	-40.1306	-74.4629	-40.0696	-85.4492	-40.1001	-103.76	-40.1306	-103.76	-40.1001	-98.2666	-40.1001	-93.3838	-40.0696	-106.201	-40.1001	-100.708	-40.1001	-131.226	-40.1001	-109.863	-40.1306	-100.098	-40.0696	-109.863	-40.1001	-104.98	-40.1001	-112.915	-40.1001	-159.302	-40.0696	-115.356	-40.1001	-180.664	-40.1001
0.4	-61.6455	-40.1001	-71.4111	-40.1306	-74.4629	-40.0696	-95.2148	-40.1001	-109.863	-40.1001	-111.084	-40.1001	-86.0596	-40.1001	-84.8389	-40.0696	-104.98	-40.1306	-122.07	-40.1306	-114.136	-40.1001	-115.967	-40.1001	-89.1113	-40.0696	-115.967	-40.1001	-96.4355	-40.1001	-107.422	-40.0696	-169.678	-40.1001	-119.629	-40.1001	-177.612	-40.1306
0.4005	-78.125	-40.1306	-67.1387	-40.1001	-75.0732	-40.1001	-90.9424	-40.0696	-89.7217	-40.1306	-93.9941	-40.0696	-68.3594	-40.1001	-87.2803	-40.1306	-115.356	-40.1306	-105.591	-40.1306	-104.37	-40.1001	-97.0459	-40.0696	-117.798	-40.1001	-114.746	-40.1001	-115.356	-40.1001	-116.577	-40.1001	-155.64	-40.1306	-119.629	-40.1001	-164.795	-40.1001
0.401	-63.4766	-40.1306	-84.2285	-40.0696	-72.6318	-40.1001	-84.8389	-40.1001	-96.4355	-40.1306	-112.915	-40.1001	-84.2285	-40.1001	-84.2285	-40.1001	-105.591	-40.1306	-101.929	-40.1306	-106.812	-40.0696	-105.591	-40.0696	-126.343	-40.1306	-120.85	-40.1001	-116.577	-40.1001	-119.019	-40.1001	-161.133	-40.0696	-125.732	-40.1306	-162.964	-40.1306
0.4015	-78.125	-40.1001	-84.8389	-40.1001	-67.1387	-40.1001	-93.3838	-40.1001	-86.6699	-40.1306	-95.8252	-40.1001	-100.098	-40.1001	-86.6699	-40.1001	-105.591	-40.1001	-109.253	-40.1001	-114.136	-40.1306	-93.3838	-40.1306	-103.149	-40.1001	-119.019	-40.1001	-119.019	-40.1001	-133.057	-40.1001	-175.781	-40.1306	-139.16	-40.1001	-154.419	-40.1306
0.402	-70.1904	-40.0696	-71.4111	-40.1001	-66.5283	-40.0696	-81.7871	-40.1001	-86.6699	-40.1306	-108.032	-40.1001	-101.318	-40.1001	-86.6699	-40.1001	-97.6563	-40.1306	-106.201	-40.0696	-116.577	-40.1001	-101.318	-40.1001	-94.6045	-40.1306	-142.822	-40.0696	-108.643	-40.1306	-123.901	-40.1001	-156.25	-40.0696	-120.239	-40.1001	-153.809	-40.1001
0.4025	-66.5283	-40.1001	-54.9316	-40.1001	-79.3457	-40.1001	-80.5664	-40.1001	-105.591	-40.1001	-104.98	-40.1001	-95.2148	-40.1001	-92.7734	-40.1001	-93.9941	-40.1306	-112.915	-40.1001	-104.98	-40.0696	-108.032	-40.1001	-108.032	-40.1001	-151.367	-40.1001	-114.136	-40.1001	-128.174	-40.1306	-148.315	-40.0696	-122.681	-40.1306	-147.095	-40.1001
0.403	-82.3975	-40.1001	-73.8525	-40.1001	-69.5801	-40.1001	-71.4111	-40.0696	-91.5527	-40.1001	-100.708	-40.0696	-104.98	-40.1306	-92.7734	-40.1306	-84.2285	-40.1306	-86.6699	-40.1001	-101.318	-40.1306	-108.032	-40.1306	-108.643	-40.1306	-132.446	-40.1306	-129.395	-40.0696	-125.732	-40.0696	-155.029	-40.0696	-126.343	-40.1001	-147.705	-40.1306
0.4035	-73.8525	-40.1001	-72.0215	-40.0696	-76.2939	-40.1001	-87.8906	-40.1001	-99.4873	-40.1306	-112.305	-40.1001	-98.877	-40.1001	-100.098	-40.1001	-92.7734	-40.1306	-113.525	-40.1001	-116.577	-40.1001	-100.098	-40.1001	-110.474	-40.1001	-110.474	-40.0696	-139.16	-40.0696	-115.356	-40.0696	-139.771	-40.1001	-129.395	-40.1001	-151.978	-40.1001
0.404	-62.8662	-40.1306	-78.7354	-40.1001	-59.8145	-40.1001	-81.1768	-40.0696	-100.708	-40.1001	-105.591	-40.1001	-98.877	-40.1306	-89.1113	-40.1001	-98.2666	-40.1306	-97.0459	-40.0696	-104.98	-40.1001	-108.032	-40.1001	-110.474	-40.1001	-112.305	-40.1001	-114.746	-40.0696	-121.46	-40.1001	-166.626	-40.1001	-132.446	-40.1001	-144.043	-40.1001
0.4045	-81.1768	-40.1306	-51.2695	-40.1001	-55.542	-40.1306	-84.8389	-40.1306	-95.8252	-40.1306	-95.8252	-40.1001	-100.708	-40.1306	-75.0732	-40.0696	-86.6699	-40.1001	-109.863	-40.1306	-109.253	-40.1001	-110.474	-40.1001	-102.539	-40.1306	-127.563	-40.1001	-107.422	-40.1001	-130.615	-40.1001	-167.847	-40.1001	-128.784	-40.1306	-153.809	-40.1001
0.405	-70.1904	-40.1001	-86.0596	-40.1306	-53.1006	-40.1001	-89.1113	-40.1001	-100.098	-40.1001	-99.4873	-40.1001	-97.0459	-40.1001	-114.136	-40.1306	-75.0732	-40.1306	-110.474	-40.1001	-120.239	-40.1306	-114.746	-40.1001	-112.305	-40.1306	-125.732	-40.1001	-114.136	-40.1001	-137.329	-40.1001	-150.146	-40.1306	-130.615	-40.1001	-142.822	-40.1001
0.4055	-85.4492	-40.1001	-68.9697	-40.1001	-69.5801	-40.1001	-87.2803	-40.1001	-96.4355	-40.1306	-98.2666	-40.1306	-95.8252	-40.1001	-113.525	-40.0696	-78.125	-40.0696	-109.253	-40.0696	-119.019	-40.1001	-97.0459	-40.1001	-113.525	-40.1001	-131.226	-40.1001	-97.0459	-40.1001	-130.615	-40.0696	-155.64	-40.1306	-111.694	-40.1001	-157.471	-40.1001
0.406	-73.2422	-40.1001	-72.6318	-40.0696	-62.8662	-40.1001	-96.4355	-40.1001	-91.5527	-40.1306	-95.8252	-40.1001	-103.76	-40.1001	-107.422	-40.0696	-91.5527	-40.1001	-112.915	-40.1001	-119.019	-40.1001	-97.6563	-40.0696	-110.474	-40.1001	-126.343	-40.1001	-115.356	-40.1001	-130.005	-40.1306	-166.626	-40.0696	-123.901	-40.1001	-150.146	-40.0696
0.4065	-78.7354	-40.1306	-61.6455	-40.0696	-72.6318	-40.1001	-80.5664	-40.1001	-92.1631	-40.1306	-104.98	-40.1001	-103.149	-40.0696	-105.591	-40.1306	-81.7871	-40.1001	-111.694	-40.0696	-118.408	-40.1001	-101.929	-40.0696	-114.136	-40.1306	-139.771	-40.1001	-95.8252	-40.1001	-117.188	-40.0696	-161.133	-40.1306	-123.291	-40.1306	-158.691	-40.0696
0.407	-70.8008	-40.1001	-85.4492	-40.1306	-71.4111	-40.1001	-81.1768	-40.1001	-109.863	-40.1306	-103.76	-40.1306	-112.915	-40.1001	-108.643	-40.1001	-73.8525	-40.1001	-116.577	-40.1001	-106.201	-40.0696	-114.136	-40.1306	-113.525	-40.1306	-122.681	-40.1001	-102.539	-40.1001	-136.719	-40.1001	-148.315	-40.1001	-119.629	-40.0696	-155.64	-40.1001
0.4075	-77.5146	-40.1306	-76.2939	-40.1001	-63.4766	-40.1001	-87.2803	-40.1306	-87.8906	-40.1001	-122.681	-40.1306	-100.708	-40.1001	-104.98	-40.1001	-90.332	-40.1001	-100.708	-40.1306	-114.136	-40.1001	-104.37	-40.0391	-119.629	-40.1001	-145.874	-40.1001	-122.07	-40.1001	-129.395	-40.0696	-148.926	-40.1001	-119.629	-40.1306	-145.874	-40.1306
0.408	-91.5527	-40.0696	-68.3594	-40.1001	-84.2285	-40.1001	-73.8525	-40.0696	-82.3975	-40.0696	-124.512	-40.1001	-97.6563	-40.1001	-92.1631	-40.0696	-91.5527	-40.1001	-112.305	-40.1001	-113.525	-40.1306	-113.525	-40.1001	-115.356	-40.1001	-115.356	-40.1306	-128.174	-40.1001	-109.253	-40.0696	-148.315	-40.1001	-110.474	-40.1001	-144.043	-40.1001
0.4085	-74.4629	-40.1001	-70.1904	-40.1001	-65.918	-40.0696	-92.1631	-40.0696	-93.9941	-40.1001	-113.525	-40.1001	-113.525	-40.1001	-86.0596	-40.1001	-80.5664	-40.1001	-109.253	-40.1001	-128.174	-40.0696	-115.967	-40.1306	-124.512	-40.1001	-136.719	-40.1306	-107.422	-40.1001	-112.915	-40.1001	-135.498	-40.1001	-114.136	-40.0696	-140.381	-40.1001
0.409	-75.6836	-40.1306	-73.8525	-40.1001	-60.4248	-40.0696	-89.1113	-40.1001	-90.332	-40.1306	-103.149	-40.1001	-93.3838	-40.1001	-108.643	-40.1001	-96.4355	-40.0696	-102.539	-40.1001	-111.084	-40.1001	-112.915	-40.0696	-111.694	-40.1001	-140.991	-40.1001	-103.76	-40.1001	-131.836	-40.1001	-147.095	-40.1001	-123.291	-40.1001	-132.446	-40.1001
0.4095	-84.2285	-40.1001	-81.1768	-40.1001	-76.9043	-40.1001	-77.5146	-40.0696	-101.318	-40.1001	-93.3838	-40.1001	-101.318	-40.1001	-101.318	-40.1001	-70.8008	-40.1001	-97.0459	-40.1001	-102.539	-40.1001	-105.591	-40.1001	-105.591	-40.1001	-142.212	-40.1001	-93.9941	-40.1001	-142.212	-40.1001	-166.016	-40.1001	-125.122	-40.1306	-158.081	-40.1001
0.41	-74.4629	-40.0696	-59.8145	-40.1001	-56.1523	-40.1001	-81.7871	-40.1001	-92.1631	-40.1001	-94.6045	-40.1001	-96.4355	-40.1306	-91.5527	-40.1001	-87.2803	-40.0696	-103.76	-40.1001	-105.591	-40.1001	-108.643	-40.1306	-110.474	-40.0696	-145.264	-40.1001	-101.929	-40.1001	-133.057	-40.1306	-137.939	-40.1001	-126.953	-40.0391	-158.081	-40.1001
0.4105	-73.8525	-40.1001	-62.8662	-40.1001	-57.9834	-40.1001	-81.1768	-40.0696	-96.4355	-40.1001	-86.0596	-40.1306	-99.4873	-40.1306	-136.108	-40.1306	-96.4355	-40.1001	-112.305	-40.1001	-112.305	-40.0696	-106.201	-40.0696	-109.253	-40.1001	-139.771	-40.1001	-115.967	-40.1306	-128.174	-40.1001	-159.912	-40.1306	-109.863	-40.0696	-158.691	-40.1001
0.411	-67.1387	-40.1001	-67.749	-40.1001	-58.5938	-40.1001	-94.6045	-40.1001	-82.3975	-40.0696	-98.2666	-40.1001	-103.149	-40.1001	-115.967	-40.1306	-89.7217	-40.1306	-88.501	-40.1001	-122.07	-40.1306	-103.76	-40.1306	-114.136	-40.0696	-128.174	-40.1001	-118.408	-40.1001	-135.498	-40.1001	-145.874	-40.1306	-108.032	-40.1001	-150.757	-40.1001
0.4115	-78.125	-40.1306	-64.6973	-40.1001	-70.8008	-40.1001	-75.6836	-40.1001	-100.708	-40.0696	-98.2666	-40.0696	-93.3838	-40.1306	-103.149	-40.1001	-93.9941	-40.1306	-103.76	-40.1001	-124.512	-40.1001	-97.6563	-40.1306	-111.694	-40.1001	-125.122	-40.0696	-117.188	-40.0696	-125.122	-40.1001	-159.302	-40.0696	-114.136	-40.1306	-160.522	-40.0696
0.412	-94.6045	-40.1306	-85.4492	-40.1306	-51.2695	-40.1001	-87.8906	-40.0696	-94.6045	-40.0696	-104.98	-40.1001	-92.1631	-40.1306	-95.8252	-40.1001	-107.422	-40.1001	-102.539	-40.1001	-122.07	-40.1001	-98.877	-40.1001	-129.395	-40.1001	-123.291	-40.1001	-111.694	-40.1001	-117.188	-40.1001	-167.847	-40.1001	-112.305	-40.1001	-163.574	-40.1306
0.4125	-73.2422	-40.1001	-71.4111	-40.1306	-67.749	-40.1001	-76.9043	-40.0696	-89.7217	-40.1001	-97.0459	-40.1001	-98.877	-40.1306	-106.812	-40.0696	-101.318	-40.1001	-104.37	-40.1001	-124.512	-40.1001	-104.98	-40.1001	-119.019	-40.1001	-129.395	-40.1001	-123.291	-40.1001	-126.343	-40.0696	-150.146	-40.1306	-126.343	-40.1306	-152.588	-40.1001
0.413	-70.8008	-40.1001	-84.8389	-40.1001	-73.2422	-40.1001	-72.6318	-40.1001	-88.501	-40.0696	-84.2285	-40.1001	-104.98	-40.0696	-117.188	-40.1306	-109.863	-40.1001	-92.1631	-40.1001	-119.019	-40.1001	-112.915	-40.1001	-125.122	-40.1001	-136.108	-40.1001	-122.07	-40.1001	-118.408	-40.1001	-151.367	-40.1001	-111.084	-40.1001	-141.602	-40.1001
0.4135	-67.749	-40.1001	-75.0732	-40.0696	-83.6182	-40.1306	-76.9043	-40.1001	-100.708	-40.1001	-93.9941	-40.1001	-89.1113	-40.1306	-98.2666	-40.0696	-100.708	-40.1001	-98.2666	-40.1001	-121.46	-40.1001	-101.318	-40.0696	-108.643	-40.1306	-130.615	-40.1001	-123.901	-40.1001	-111.694	-40.1001	-144.043	-40.1001	-125.122	-40.1001	-151.367	-40.1001
0.414	-81.1768	-40.1001	-68.3594	-40.1001	-80.5664	-40.1306	-83.6182	-40.1001	-80.5664	-40.0696	-95.8252	-40.1001	-95.8252	-40.1306	-92.7734	-40.1306	-95.8252	-40.1001	-100.708	-40.1001	-110.474	-40.1001	-99.4873	-40.1001	-118.408	-40.1001	-124.512	-40.1001	-121.46	-40.1001	-130.615	-40.1001	-137.329	-40.1001	-110.474	-40.1001	-156.25	-40.1306
0.4145	-79.9561	-40.1001	-71.4111	-40.1001	-66.5283	-40.1306	-99.4873	-40.1001	-98.877	-40.1001	-95.8252	-40.0696	-102.539	-40.1001	-104.98	-40.1306	-98.877	-40.1001	-109.253	-40.0696	-115.967	-40.1001	-104.37	-40.1001	-116.577	-40.1306	-116.577	-40.0696	-122.681	-40.1001	-123.901	-40.1001	-156.86	-40.1306	-130.005	-40.0696	-163.574	-40.1001
0.415	-62.8662	-40.1001	-72.6318	-40.1306	-86.0596	-40.1306	-94.6045	-40.1001	-90.9424	-40.1001	-101.929	-40.1001	-101.318	-40.1001	-98.2666	-40.1306	-96.4355	-40.0696	-86.6699	-40.1001	-119.019	-40.1001	-93.3838	-40.1001	-120.85	-40.0696	-122.07	-40.1001	-120.85	-40.0696	-112.915	-40.1001	-158.081	-40.1001	-122.07	-40.1001	-148.926	-40.1001
0.4155	-65.3076	-40.1001	-73.8525	-40.1306	-81.7871	-40.1001	-106.812	-40.1001	-90.9424	-40.0696	-96.4355	-40.1001	-100.098	-40.1001	-115.356	-40.1001	-111.694	-40.1001	-89.7217	-40.1611	-110.474	-40.1001	-93.3838	-40.0696	-125.732	-40.1001	-125.732	-40.1001	-111.084	-40.1306	-131.226	-40.0696	-159.302	-40.1001	-126.953	-40.1001	-150.757	-40.1001
0.416	-72.6318	-40.1001	-69.5801	-40.1001	-63.4766	-40.1306	-109.253	-40.0696	-87.2803	-40.0696	-105.591	-40.1001	-97.0459	-40.1001	-106.201	-40.1001	-111.694	-40.1001	-100.708	-40.1001	-112.305	-40.1001	-97.6563	-40.1001	-141.602	-40.1306	-127.563	-40.1306	-140.381	-40.1001	-129.395	-40.0696	-162.964	-40.0696	-123.291	-40.1306	-155.64	-40.0696
0.4165	-68.9697	-40.1001	-62.2559	-40.1001	-57.373	-40.0696	-100.098	-40.1001	-114.746	-40.1001	-77.5146	-40.1306	-103.149	-40.1001	-87.2803	-40.1001	-104.98	-40.0696	-107.422	-40.1001	-123.291	-40.1001	-96.4355	-40.1306	-110.474	-40.1001	-128.174	-40.0696	-129.395	-40.1001	-139.771	-40.1001	-150.757	-40.1001	-130.005	-40.1001	-141.602	-40.1306
0.417	-64.6973	-40.1306	-85.4492	-40.1001	-61.6455	-40.1001	-90.332	-40.1001	-99.4873	-40.1001	-78.7354	-40.0696	-93.3838	-40.1001	-103.76	-40.0696	-98.877	-40.0696	-95.8252	-40.1001	-124.512	-40.0696	-81.1768	-40.0696	-112.915	-40.1001	-127.563	-40.0696	-125.122	-40.1001	-132.446	-40.0696	-151.978	-40.1001	-130.005	-40.0696	-146.484	-40.1001
0.4175	-71.4111	-40.0696	-67.1387	-40.1306	-76.2939	-40.1306	-106.201	-40.1001	-90.332	-40.1001	-91.5527	-40.0696	-90.9424	-40.0696	-104.37	-40.1001	-80.5664	-40.1001	-107.422	-40.0696	-103.76	-40.1001	-89.7217	-40.1001	-112.915	-40.1306	-108.032	-40.1001	-125.732	-40.1306	-132.446	-40.1306	-150.146	-40.1001	-112.915	-40.1001	-165.405	-40.1001
0.418	-62.8662	-40.0696	-81.7871	-40.1001	-68.9697	-40.1001	-86.0596	-40.1306	-104.98	-40.1001	-82.3975	-40.1001	-97.6563	-40.1001	-108.643	-40.0696	-101.929	-40.0696	-105.591	-40.1001	-109.253	-40.1001	-110.474	-40.0696	-111.084	-40.0696	-109.253	-40.1306	-121.46	-40.1001	-126.953	-40.1001	-142.822	-40.1001	-137.939	-40.1001	-128.784	-40.0696
0.4185	-65.3076	-40.1001	-58.5938	-40.1001	-59.8145	-40.1001	-91.5527	-40.1306	-103.76	-40.1001	-88.501	-40.1001	-86.6699	-40.0696	-103.76	-40.1001	-109.863	-40.0696	-112.305	-40.1306	-120.85	-40.1001	-79.9561	-40.1001	-108.643	-40.0696	-111.694	-40.1001	-108.643	-40.1001	-113.525	-40.1001	-157.471	-40.1001	-136.719	-40.1306	-150.146	-40.1001
0.419	-73.2422	-40.1001	-57.9834	-40.1001	-73.2422	-40.1001	-102.539	-40.1001	-111.694	-40.0696	-93.3838	-40.1001	-81.7871	-40.1001	-85.4492	-40.1001	-100.098	-40.1001	-109.863	-40.0696	-117.798	-40.1001	-95.8252	-40.0696	-111.084	-40.1001	-111.084	-40.0696	-103.149	-40.1001	-134.888	-40.1306	-154.419	-40.1001	-123.901	-40.1001	-157.471	-40.1001
0.4195	-74.4629	-40.1001	-68.9697	-40.1001	-62.8662	-40.1001	-95.8252	-40.1001	-93.3838	-40.1306	-101.318	-40.1001	-86.6699	-40.1001	-102.539	-40.1001	-93.9941	-40.1001	-112.305	-40.1001	-124.512	-40.1001	-103.76	-40.1001	-107.422	-40.1001	-112.915	-40.1001	-113.525	-40.0696	-135.498	-40.0696	-158.081	-40.0696	-119.629	-40.1001	-161.743	-40.1001
0.42	-57.9834	-40.1001	-77.5146	-40.1001	-61.6455	-40.1001	-83.0078	-40.1001	-91.5527	-40.1001	-102.539	-40.1001	-87.2803	-40.1001	-122.07	-40.1001	-92.1631	-40.1001	-115.356	-40.1001	-101.318	-40.1001	-102.539	-40.1001	-115.356	-40.1001	-126.343	-40.1001	-142.212	-40.1001	-126.953	-40.1001	-158.691	-40.1001	-136.719	-40.1001	-147.095	-40.1306
0.4205	-69.5801	-40.1306	-62.8662	-40.1306	-62.8662	-40.1001	-116.577	-40.1001	-90.9424	-40.0696	-101.929	-40.1001	-87.8906	-40.1306	-120.239	-40.1001	-100.708	-40.0696	-106.201	-40.1306	-102.539	-40.1001	-100.098	-40.1001	-100.098	-40.1001	-128.174	-40.1306	-127.563	-40.1001	-115.356	-40.0696	-168.457	-40.1306	-119.629	-40.1001	-158.691	-40.1001
0.421	-71.4111	-40.0696	-77.5146	-40.1001	-66.5283	-40.1001	-106.201	-40.1001	-95.2148	-40.1306	-92.7734	-40.1001	-110.474	-40.1001	-110.474	-40.0696	-91.5527	-40.1001	-122.07	-40.1001	-126.953	-40.1001	-112.915	-40.1306	-101.318	-40.1001	-120.239	-40.1001	-112.915	-40.1306	-131.226	-40.1001	-178.223	-40.0696	-125.122	-40.1001	-154.419	-40.1306
0.4215	-78.7354	-40.1001	-82.3975	-40.1306	-59.8145	-40.1001	-92.7734	-40.1001	-93.9941	-40.1001	-73.8525	-40.1306	-130.615	-40.1001	-95.2148	-40.1001	-86.6699	-40.0696	-118.408	-40.1306	-117.798	-40.1306	-97.6563	-40.1001	-101.318	-40.1001	-101.929	-40.1001	-112.915	-40.1306	-128.784	-40.1001	-164.795	-40.1001	-146.484	-40.0696	-143.433	-40.1306
0.422	-65.3076	-40.0696	-80.5664	-40.1001	-57.9834	-40.1001	-79.9561	-40.1001	-98.877	-40.1001	-100.098	-40.1001	-106.201	-40.1001	-93.3838	-40.1306	-85.4492	-40.1001	-113.525	-40.1306	-121.46	-40.1001	-104.98	-40.1001	-103.76	-40.1001	-103.149	-40.1001	-120.239	-40.1001	-123.291	-40.1001	-147.705	-40.1306	-128.174	-40.0696	-141.602	-40.1306
0.4225	-78.125	-40.1001	-76.2939	-40.1001	-59.2041	-40.0696	-93.9941	-40.1001	-101.318	-40.1001	-87.2803	-40.1001	-107.422	-40.1001	-89.7217	-40.0696	-72.6318	-40.0696	-106.201	-40.1001	-123.901	-40.1001	-87.2803	-40.1001	-103.76	-40.1001	-115.356	-40.0696	-136.108	-40.1001	-123.291	-40.1306	-161.743	-40.1001	-127.563	-40.1001	-143.433	-40.1001
0.423	-69.5801	-40.1001	-73.2422	-40.1001	-61.0352	-40.0696	-99.4873	-40.1001	-104.37	-40.1001	-109.253	-40.1001	-118.408	-40.1306	-98.2666	-40.1306	-99.4873	-40.1001	-104.98	-40.1001	-122.681	-40.1001	-93.9941	-40.1001	-105.591	-40.1001	-108.643	-40.1001	-134.888	-40.1306	-130.615	-40.0696	-171.509	-40.1001	-115.967	-40.0696	-126.343	-40.1306
0.4235	-70.1904	-40.1001	-72.6318	-40.1001	-84.2285	-40.1001	-98.2666	-40.1001	-114.136	-40.0696	-105.591	-40.1001	-111.084	-40.1306	-101.318	-40.1306	-85.4492	-40.1306	-109.863	-40.1001	-131.836	-40.1001	-106.812	-40.1001	-103.149	-40.0696	-99.4873	-40.1001	-137.329	-40.1001	-123.901	-40.1001	-150.757	-40.1001	-123.291	-40.1001	-139.16	-40.1001
0.424	-89.7217	-40.1001	-83.0078	-40.1306	-90.332	-40.0696	-83.6182	-40.1001	-100.098	-40.1001	-97.6563	-40.0696	-110.474	-40.1001	-111.084	-40.1001	-98.2666	-40.1001	-112.915	-40.1306	-134.888	-40.1001	-106.201	-40.1001	-90.9424	-40.1001	-124.512	-40.0696	-133.667	-40.1001	-115.967	-40.1001	-140.381	-40.1001	-116.577	-40.0696	-136.108	-40.0696
0.4245	-75.0732	-40.1001	-68.3594	-40.1306	-69.5801	-40.1001	-81.1768	-40.1001	-116.577	-40.1001	-106.812	-40.1001	-114.136	-40.1001	-90.332	-40.0696	-103.76	-40.1001	-109.863	-40.1001	-131.836	-40.1001	-107.422	-40.1306	-99.4873	-40.1001	-122.681	-40.1001	-123.291	-40.0696	-128.784	-40.0696	-167.236	-40.1001	-126.343	-40.1001	-132.446	-40.1306
0.425	-81.1768	-40.1001	-74.4629	-40.1001	-64.0869	-40.1001	-87.8906	-40.1001	-101.929	-40.1001	-100.708	-40.1001	-117.798	-40.1001	-96.4355	-40.0696	-89.7217	-40.1001	-115.967	-40.0696	-139.16	-40.1001	-112.915	-40.1001	-105.591	-40.1001	-113.525	-40.1001	-136.108	-40.1001	-122.681	-40.0696	-151.367	-40.1001	-128.784	-40.0696	-140.991	-40.1001
0.4255	-74.4629	-40.1001	-63.4766	-40.1001	-64.6973	-40.1001	-87.2803	-40.0696	-95.2148	-40.1306	-96.4355	-40.1001	-119.019	-40.0696	-117.798	-40.1001	-101.929	-40.1001	-98.877	-40.1306	-120.85	-40.1001	-100.708	-40.1001	-100.098	-40.1001	-114.746	-40.1306	-122.681	-40.1001	-131.226	-40.1306	-153.198	-40.1306	-122.07	-40.1001	-133.057	-40.1001
0.426	-87.2803	-40.1001	-58.5938	-40.0696	-72.0215	-40.1001	-90.332	-40.1001	-88.501	-40.1306	-97.6563	-40.1001	-124.512	-40.1001	-117.188	-40.1001	-103.149	-40.1001	-117.188	-40.1001	-132.446	-40.1001	-114.746	-40.1001	-109.863	-40.1001	-111.084	-40.1001	-140.991	-40.1001	-134.277	-40.1001	-133.057	-40.0696	-126.343	-40.0696	-139.771	-40.1001
0.4265	-75.6836	-40.1001	-65.918	-40.0696	-70.8008	-40.1306	-95.8252	-40.0696	-85.4492	-40.0696	-89.7217	-40.0696	-125.122	-40.1306	-96.4355	-40.1001	-101.929	-40.0696	-112.915	-40.1001	-122.07	-40.1001	-103.76	-40.1001	-90.332	-40.1001	-133.667	-40.1001	-111.694	-40.1306	-116.577	-40.1306	-141.602	-40.1306	-130.005	-40.1001	-117.798	-40.0696
0.427	-63.4766	-40.0696	-75.0732	-40.1306	-78.7354	-40.1306	-94.6045	-40.1001	-105.591	-40.0696	-106.812	-40.1001	-105.591	-40.1001	-111.084	-40.1306	-89.7217	-40.1001	-112.305	-40.1001	-98.2666	-40.1001	-103.76	-40.1306	-100.098	-40.1001	-128.174	-40.1001	-114.136	-40.1001	-125.122	-40.1001	-141.602	-40.1001	-126.343	-40.1001	-138.55	-40.1001
0.4275	-68.9697	-40.1001	-60.4248	-40.1001	-65.3076	-40.1001	-79.9561	-40.0696	-94.6045	-40.0696	-97.6563	-40.0696	-117.798	-40.1001	-103.149	-40.1001	-93.9941	-40.1001	-108.032	-40.1001	-108.032	-40.1001	-91.5527	-40.1001	-103.76	-40.1001	-113.525	-40.0696	-120.239	-40.1001	-126.953	-40.1306	-154.419	-40.0696	-122.07	-40.1001	-126.953	-40.0696
0.428	-73.8525	-40.1306	-57.9834	-40.0391	-65.3076	-40.1001	-83.0078	-40.1001	-95.8252	-40.0696	-77.5146	-40.0696	-111.694	-40.1306	-108.032	-40.1001	-95.2148	-40.0391	-109.863	-40.1306	-107.422	-40.1001	-110.474	-40.1001	-108.643	-40.0696	-117.188	-40.1306	-131.226	-40.1001	-123.291	-40.0696	-155.029	-40.1001	-105.591	-40.1001	-132.446	-40.1001
0.4285	-89.7217	-40.1306	-63.4766	-40.1306	-68.9697	-40.1001	-79.3457	-40.0696	-88.501	-40.1001	-89.7217	-40.0696	-111.084	-40.1001	-130.005	-40.1001	-83.6182	-40.1001	-113.525	-40.0696	-114.746	-40.1001	-87.8906	-40.1001	-114.746	-40.1001	-131.226	-40.1001	-125.732	-40.0696	-118.408	-40.1001	-136.719	-40.0696	-123.291	-40.1001	-137.939	-40.1001
0.429	-82.3975	-40.1306	-72.6318	-40.1611	-72.6318	-40.1001	-79.3457	-40.1001	-91.5527	-40.1306	-87.2803	-40.1306	-106.812	-40.1001	-117.798	-40.0696	-95.8252	-40.0696	-95.8252	-40.0696	-109.863	-40.0696	-98.2666	-40.1001	-100.098	-40.1611	-114.746	-40.1001	-144.043	-40.1001	-136.108	-40.1306	-149.536	-40.1001	-123.291	-40.1306	-144.653	-40.1001
0.4295	-73.8525	-40.1001	-70.1904	-40.0696	-63.4766	-40.1001	-74.4629	-40.1001	-89.1113	-40.1001	-92.1631	-40.1001	-102.539	-40.1306	-120.239	-40.0696	-98.877	-40.0696	-108.032	-40.0696	-116.577	-40.0696	-100.098	-40.1001	-97.0459	-40.0696	-135.498	-40.1001	-128.174	-40.1001	-112.305	-40.0696	-165.405	-40.0696	-95.2148	-40.0696	-134.888	-40.1306
0.43	-76.9043	-40.0696	-72.0215	-40.1001	-77.5146	-40.1306	-84.2285	-40.1001	-92.7734	-40.1001	-83.6182	-40.1001	-111.694	-40.1001	-116.577	-40.1001	-80.5664	-40.1001	-99.4873	-40.0696	-104.98	-40.0696	-90.9424	-40.1001	-104.37	-40.1306	-127.563	-40.0696	-133.667	-40.1001	-120.239	-40.0696	-147.095	-40.1306	-124.512	-40.1001	-134.888	-40.1001
0.4305	-73.8525	-40.0696	-70.8008	-40.1306	-62.2559	-40.1001	-99.4873	-40.1001	-93.3838	-40.1001	-100.098	-40.1306	-112.305	-40.1001	-119.019	-40.1306	-105.591	-40.1001	-96.4355	-40.1001	-111.694	-40.1001	-103.149	-40.0696	-105.591	-40.1001	-128.174	-40.1001	-137.329	-40.1001	-131.226	-40.1001	-151.978	-40.1001	-112.305	-40.0696	-128.784	-40.1001
0.431	-64.6973	-40.1001	-75.0732	-40.0696	-72.6318	-40.1001	-74.4629	-40.1001	-98.877	-40.1001	-82.3975	-40.0696	-101.929	-40.1306	-136.108	-40.1611	-84.2285	-40.1001	-116.577	-40.1001	-115.967	-40.0696	-97.0459	-40.1001	-97.6563	-40.1306	-136.108	-40.1001	-125.732	-40.1001	-130.005	-40.1001	-150.146	-40.1001	-103.149	-40.0696	-119.019	-40.0696
0.4315	-66.5283	-40.1306	-64.0869	-40.0696	-68.3594	-40.0696	-68.3594	-40.1001	-101.929	-40.1001	-79.3457	-40.0696	-104.98	-40.0696	-124.512	-40.1001	-98.877	-40.1001	-104.98	-40.1001	-108.643	-40.1306	-91.5527	-40.1001	-122.07	-40.1306	-119.629	-40.1001	-144.043	-40.1001	-134.888	-40.0696	-155.029	-40.1001	-112.915	-40.1306	-136.719	-40.1001
0.432	-80.5664	-40.1001	-60.4248	-40.1001	-65.918	-40.1306	-92.1631	-40.0696	-105.591	-40.1306	-84.2285	-40.0696	-118.408	-40.1001	-119.019	-40.1001	-104.37	-40.1001	-93.9941	-40.0696	-115.356	-40.1306	-93.3838	-40.1306	-105.591	-40.1001	-137.939	-40.1306	-126.953	-40.1306	-133.667	-40.1306	-148.315	-40.1306	-122.07	-40.0696	-139.771	-40.1001
0.4325	-95.2148	-40.1306	-70.8008	-40.1001	-66.5283	-40.1001	-81.1768	-40.1306	-94.6045	-40.1001	-86.0596	-40.1001	-112.305	-40.1001	-130.615	-40.1001	-96.4355	-40.1001	-103.76	-40.1001	-107.422	-40.1001	-84.8389	-40.1306	-113.525	-40.1001	-140.991	-40.1001	-141.602	-40.1001	-145.264	-40.1001	-153.198	-40.0696	-121.46	-40.1001	-144.043	-40.1001
0.433	-79.9561	-40.1001	-78.7354	-40.1001	-64.0869	-40.1001	-85.4492	-40.1001	-89.1113	-40.1306	-86.0596	-40.0696	-97.6563	-40.1001	-112.915	-40.1001	-97.6563	-40.1001	-109.863	-40.1001	-120.85	-40.1001	-100.708	-40.1306	-107.422	-40.1001	-125.732	-40.1001	-109.863	-40.0696	-137.329	-40.1001	-147.095	-40.1001	-121.46	-40.1001	-140.991	-40.1001
0.4335	-85.4492	-40.1001	-61.0352	-40.1001	-70.8008	-40.1001	-75.6836	-40.1306	-89.1113	-40.1001	-82.3975	-40.1306	-102.539	-40.1001	-119.629	-40.1001	-100.098	-40.1001	-103.149	-40.0696	-111.084	-40.1306	-121.46	-40.1001	-92.7734	-40.1001	-137.939	-40.1306	-124.512	-40.1306	-129.395	-40.1306	-147.705	-40.0696	-114.746	-40.0696	-134.888	-40.1306
0.434	-76.9043	-40.1001	-65.3076	-40.1001	-70.1904	-40.1001	-90.9424	-40.1306	-92.7734	-40.1001	-85.4492	-40.1001	-108.643	-40.1306	-117.188	-40.1001	-86.6699	-40.0696	-106.201	-40.1306	-102.539	-40.1001	-95.2148	-40.1001	-114.136	-40.1001	-134.277	-40.1001	-135.498	-40.1306	-134.277	-40.1306	-145.874	-40.1001	-122.07	-40.1001	-145.874	-40.1306
0.4345	-88.501	-40.1001	-77.5146	-40.1001	-60.4248	-40.1001	-90.332	-40.1306	-98.2666	-40.0696	-88.501	-40.1001	-103.76	-40.1306	-137.939	-40.1001	-95.2148	-40.1001	-124.512	-40.1001	-113.525	-40.1001	-107.422	-40.0696	-106.201	-40.1001	-139.16	-40.1306	-126.343	-40.0696	-130.615	-40.1001	-159.302	-40.1001	-136.719	-40.1001	-139.771	-40.1001
0.435	-81.1768	-40.1001	-65.3076	-40.1001	-62.8662	-40.1001	-79.9561	-40.1001	-106.812	-40.1306	-73.8525	-40.1001	-98.877	-40.1001	-140.991	-40.1001	-103.76	-40.1001	-120.85	-40.1001	-117.188	-40.1001	-96.4355	-40.0696	-97.6563	-40.1306	-139.16	-40.1306	-131.226	-40.1306	-139.16	-40.1001	-150.757	-40.1001	-120.85	-40.1001	-131.836	-40.1001
0.4355	-70.1904	-40.1001	-60.4248	-40.1306	-83.0078	-40.1001	-85.4492	-40.1001	-108.643	-40.1306	-72.6318	-40.1001	-91.5527	-40.1306	-125.122	-40.1001	-91.5527	-40.1001	-115.356	-40.1306	-111.694	-40.1001	-107.422	-40.1001	-104.98	-40.1001	-164.185	-40.1001	-119.019	-40.1001	-145.874	-40.1001	-148.926	-40.1001	-131.836	-40.1306	-134.888	-40.0696
0.436	-83.6182	-40.1001	-75.6836	-40.1001	-69.5801	-40.1001	-95.2148	-40.1001	-101.318	-40.1306	-65.3076	-40.0696	-94.6045	-40.1001	-115.967	-40.1001	-99.4873	-40.1001	-121.46	-40.1306	-110.474	-40.1001	-100.098	-40.1001	-106.812	-40.1001	-154.419	-40.1001	-113.525	-40.1001	-133.667	-40.1001	-135.498	-40.1001	-134.277	-40.1001	-151.367	-40.1001
0.4365	-65.3076	-40.1001	-57.373	-40.1306	-64.0869	-40.1001	-95.2148	-40.1001	-90.9424	-40.1306	-79.9561	-40.1001	-97.0459	-40.1001	-108.643	-40.1001	-90.332	-40.1001	-126.343	-40.1306	-115.356	-40.1001	-111.084	-40.1001	-106.201	-40.1001	-144.043	-40.1001	-122.07	-40.1001	-142.822	-40.1001	-145.874	-40.1001	-150.146	-40.1001	-148.315	-40.1001
0.437	-77.5146	-40.1001	-64.0869	-40.1001	-68.9697	-40.1001	-91.5527	-40.1001	-86.6699	-40.1001	-85.4492	-40.1306	-98.877	-40.1001	-125.122	-40.0696	-104.98	-40.0696	-148.315	-40.1001	-122.07	-40.1001	-97.0459	-40.1001	-113.525	-40.1306	-143.433	-40.0696	-107.422	-40.1001	-111.694	-40.1306	-137.329	-40.1306	-142.212	-40.1001	-140.991	-40.1001
0.4375	-66.5283	-40.1001	-57.9834	-40.1306	-70.8008	-40.1001	-115.967	-40.1001	-94.6045	-40.1001	-93.9941	-40.1001	-96.4355	-40.1001	-110.474	-40.1001	-107.422	-40.1001	-133.667	-40.1001	-119.019	-40.1001	-97.0459	-40.1001	-103.76	-40.1001	-126.343	-40.1306	-112.915	-40.1001	-133.667	-40.1001	-148.315	-40.1001	-136.108	-40.0696	-155.029	-40.1001
0.438	-68.3594	-40.0696	-76.2939	-40.1001	-81.1768	-40.0696	-94.6045	-40.1001	-98.877	-40.1001	-101.318	-40.1001	-103.149	-40.1001	-101.929	-40.1001	-100.708	-40.1306	-123.291	-40.0696	-107.422	-40.1001	-95.8252	-40.1001	-103.149	-40.1001	-122.681	-40.0696	-122.681	-40.1306	-134.277	-40.1001	-140.381	-40.1001	-129.395	-40.1001	-131.226	-40.1001
0.4385	-73.8525	-40.1001	-76.9043	-40.1001	-84.8389	-40.1306	-103.76	-40.1001	-104.98	-40.1306	-86.6699	-40.1001	-89.7217	-40.1001	-113.525	-40.1001	-89.7217	-40.0696	-133.667	-40.1001	-125.732	-40.0696	-98.877	-40.1001	-109.863	-40.1001	-133.057	-40.0696	-108.643	-40.0696	-117.798	-40.1001	-141.602	-40.1001	-132.446	-40.0696	-147.705	-40.1001
0.439	-68.3594	-40.1306	-69.5801	-40.1001	-84.8389	-40.1001	-100.098	-40.1001	-101.318	-40.0696	-82.3975	-40.0696	-94.6045	-40.0696	-118.408	-40.1306	-93.9941	-40.1306	-129.395	-40.0696	-131.836	-40.1306	-88.501	-40.0696	-111.694	-40.1001	-141.602	-40.0696	-112.915	-40.1001	-133.057	-40.1001	-143.433	-40.1611	-124.512	-40.1306	-143.433	-40.1001
0.4395	-78.125	-40.1001	-53.7109	-40.0696	-72.0215	-40.1001	-86.6699	-40.0696	-111.084	-40.1001	-78.7354	-40.0696	-96.4355	-40.1001	-137.329	-40.1001	-103.76	-40.1306	-129.395	-40.1001	-131.836	-40.1001	-104.37	-40.1001	-108.643	-40.1001	-118.408	-40.1001	-94.6045	-40.1001	-132.446	-40.0696	-155.64	-40.0696	-133.667	-40.1001	-151.978	-40.1001
0.44	-74.4629	-40.1001	-65.918	-40.1306	-79.3457	-40.0696	-114.136	-40.1001	-100.098	-40.0696	-95.2148	-40.1001	-111.084	-40.1001	-115.967	-40.1001	-85.4492	-40.1306	-108.032	-40.1001	-121.46	-40.1306	-103.149	-40.1001	-96.4355	-40.1001	-140.381	-40.1001	-115.356	-40.0696	-122.07	-40.0696	-169.067	-40.1001	-133.057	-40.1001	-150.146	-40.0696
0.4405	-80.5664	-40.1001	-60.4248	-40.1001	-64.6973	-40.1001	-95.2148	-40.1306	-102.539	-40.1001	-86.6699	-40.1001	-109.863	-40.0696	-108.032	-40.0696	-103.76	-40.0696	-103.149	-40.1001	-112.305	-40.0696	-87.2803	-40.1001	-99.4873	-40.1001	-128.784	-40.1001	-92.1631	-40.0696	-135.498	-40.0696	-165.405	-40.1001	-128.174	-40.1001	-141.602	-40.0696
0.441	-79.3457	-40.0696	-54.9316	-40.1001	-78.125	-40.1306	-99.4873	-40.1001	-108.032	-40.0696	-102.539	-40.1306	-101.929	-40.1306	-102.539	-40.1001	-81.1768	-40.1001	-107.422	-40.1306	-115.356	-40.1001	-93.3838	-40.1001	-97.6563	-40.1611	-130.615	-40.0696	-117.188	-40.0696	-123.291	-40.0696	-147.095	-40.1001	-140.381	-40.1001	-136.719	-40.1001
0.4415	-72.0215	-40.1306	-70.1904	-40.1001	-62.2559	-40.0696	-76.9043	-40.1001	-104.37	-40.1001	-103.149	-40.1001	-120.239	-40.1306	-97.6563	-40.1306	-100.708	-40.1001	-117.798	-40.1001	-132.446	-40.0391	-84.2285	-40.1306	-100.708	-40.1001	-126.343	-40.1306	-118.408	-40.0696	-131.226	-40.1306	-161.743	-40.0696	-130.615	-40.1001	-138.55	-40.1306
0.442	-60.4248	-40.1001	-57.9834	-40.0696	-76.2939	-40.0696	-76.9043	-40.1306	-103.76	-40.1001	-95.2148	-40.1001	-93.9941	-40.1001	-106.812	-40.1001	-97.6563	-40.1001	-101.929	-40.0696	-123.291	-40.1001	-108.032	-40.1001	-100.098	-40.0696	-117.798	-40.1306	-125.732	-40.1001	-144.653	-40.1001	-170.898	-40.1001	-139.771	-40.0696	-137.329	-40.1001
0.4425	-82.3975	-40.1001	-57.9834	-40.1001	-65.918	-40.1001	-95.8252	-40.1001	-114.136	-40.1001	-100.708	-40.1001	-101.318	-40.1001	-106.812	-40.1001	-90.332	-40.1306	-106.201	-40.0696	-113.525	-40.0696	-83.0078	-40.1001	-104.98	-40.1001	-126.343	-40.0696	-120.239	-40.1001	-119.629	-40.1001	-162.354	-40.1001	-126.343	-40.1001	-141.602	-40.1001
0.443	-75.6836	-40.1001	-57.9834	-40.1001	-79.9561	-40.1001	-96.4355	-40.1306	-107.422	-40.1306	-96.4355	-40.1001	-93.9941	-40.1001	-105.591	-40.1001	-86.6699	-40.1306	-117.188	-40.1001	-111.084	-40.1001	-109.253	-40.1306	-97.6563	-40.1001	-121.46	-40.1001	-108.643	-40.0696	-139.771	-40.1306	-141.602	-40.1001	-140.381	-40.0696	-145.264	-40.0696
0.4435	-78.125	-40.1001	-52.4902	-40.1001	-62.8662	-40.1001	-99.4873	-40.1001	-98.877	-40.1001	-103.76	-40.1001	-92.1631	-40.1306	-124.512	-40.1001	-100.098	-40.1001	-104.98	-40.1001	-115.967	-40.0696	-97.0459	-40.0696	-106.812	-40.0696	-132.446	-40.1001	-116.577	-40.0696	-126.953	-40.1001	-137.329	-40.1001	-136.108	-40.0696	-147.095	-40.1001
0.444	-85.4492	-40.1306	-62.2559	-40.1001	-76.9043	-40.1001	-86.0596	-40.1001	-103.149	-40.1001	-101.929	-40.0696	-97.0459	-40.1001	-90.9424	-40.1001	-100.708	-40.1001	-126.343	-40.1001	-120.239	-40.1001	-97.0459	-40.1001	-111.084	-40.1001	-130.615	-40.0696	-110.474	-40.0696	-132.446	-40.0696	-155.029	-40.1001	-130.005	-40.1306	-137.329	-40.1001
0.4445	-75.0732	-40.1001	-68.9697	-40.1001	-55.542	-40.0696	-84.2285	-40.1001	-107.422	-40.1001	-100.708	-40.1001	-101.929	-40.1611	-79.9561	-40.0696	-99.4873	-40.1001	-119.019	-40.1001	-131.836	-40.1001	-90.9424	-40.1001	-109.253	-40.1001	-133.057	-40.1001	-99.4873	-40.1001	-122.07	-40.1001	-145.874	-40.1001	-141.602	-40.0696	-135.498	-40.1001
0.445	-74.4629	-40.1306	-87.2803	-40.1001	-58.5938	-40.1001	-91.5527	-40.1306	-113.525	-40.1306	-100.708	-40.1001	-97.0459	-40.1306	-108.032	-40.0696	-86.6699	-40.1001	-100.708	-40.1001	-122.681	-40.1001	-96.4355	-40.1001	-105.591	-40.1306	-128.174	-40.1001	-107.422	-40.0696	-134.888	-40.1001	-159.912	-40.1001	-123.291	-40.1001	-135.498	-40.1306
0.4455	-80.5664	-40.1001	-74.4629	-40.1001	-66.5283	-40.1001	-82.3975	-40.1001	-87.8906	-40.1001	-103.76	-40.1001	-97.0459	-40.1001	-111.694	-40.1001	-86.0596	-40.1001	-107.422	-40.1306	-124.512	-40.1001	-90.332	-40.1001	-115.967	-40.0696	-116.577	-40.1001	-112.305	-40.1001	-131.226	-40.0696	-155.029	-40.1001	-119.629	-40.1001	-141.602	-40.1001
0.446	-69.5801	-40.1001	-68.3594	-40.1306	-79.9561	-40.1001	-85.4492	-40.1306	-94.6045	-40.1001	-108.032	-40.1001	-89.1113	-40.1001	-92.1631	-40.1001	-104.98	-40.1001	-108.643	-40.0696	-138.55	-40.1001	-78.7354	-40.1001	-120.85	-40.1001	-110.474	-40.1001	-118.408	-40.0696	-127.563	-40.0696	-155.029	-40.1001	-142.212	-40.1001	-125.122	-40.1001
0.4465	-73.8525	-40.1001	-70.1904	-40.0696	-78.125	-40.1001	-79.3457	-40.1306	-95.8252	-40.1001	-120.239	-40.1001	-100.708	-40.0696	-105.591	-40.1001	-75.0732	-40.0696	-92.1631	-40.1001	-119.629	-40.1001	-100.708	-40.1001	-109.253	-40.1001	-132.446	-40.1001	-92.7734	-40.1001	-123.291	-40.1306	-180.054	-40.1001	-128.174	-40.1001	-128.174	-40.0696
0.447	-74.4629	-40.1001	-71.4111	-40.1001	-82.3975	-40.1001	-83.0078	-40.0696	-95.8252	-40.0696	-110.474	-40.1001	-98.877	-40.0696	-116.577	-40.1001	-96.4355	-40.0696	-96.4355	-40.1306	-118.408	-40.1001	-92.7734	-40.1001	-109.253	-40.0696	-109.863	-40.1001	-109.863	-40.0696	-112.915	-40.1001	-155.029	-40.1001	-133.667	-40.1001	-147.095	-40.0696
0.4475	-79.3457	-40.0696	-71.4111	-40.1611	-70.8008	-40.0696	-80.5664	-40.1001	-98.2666	-40.1001	-93.3838	-40.1306	-92.1631	-40.1001	-116.577	-40.1001	-82.3975	-40.1001	-106.812	-40.0696	-114.746	-40.1001	-94.6045	-40.1001	-130.005	-40.0696	-128.784	-40.1001	-116.577	-40.1001	-140.991	-40.1001	-166.626	-40.1001	-133.667	-40.0696	-152.588	-40.0696
0.448	-90.9424	-40.1306	-85.4492	-40.1001	-73.2422	-40.1001	-77.5146	-40.1306	-115.967	-40.1001	-112.915	-40.1001	-101.318	-40.1306	-97.6563	-40.1306	-81.1768	-40.1001	-104.37	-40.1001	-106.201	-40.1001	-90.332	-40.1306	-115.967	-40.1001	-116.577	-40.1001	-110.474	-40.1001	-117.188	-40.0696	-161.743	-40.1001	-142.212	-40.1001	-134.277	-40.1001
0.4485	-85.4492	-40.1306	-72.6318	-40.1001	-84.2285	-40.1001	-83.0078	-40.1001	-83.6182	-40.0696	-97.0459	-40.1001	-98.2666	-40.1001	-120.85	-40.1001	-73.8525	-40.1001	-89.7217	-40.1001	-117.188	-40.1306	-93.3838	-40.1001	-116.577	-40.1001	-117.188	-40.1001	-112.305	-40.1306	-116.577	-40.1001	-151.978	-40.0696	-131.226	-40.1306	-143.433	-40.1001
0.449	-77.5146	-40.1001	-78.125	-40.1001	-83.0078	-40.1001	-87.2803	-40.1001	-84.2285	-40.1001	-100.708	-40.1001	-109.253	-40.1306	-123.291	-40.0696	-84.8389	-40.0696	-91.5527	-40.1001	-115.967	-40.0696	-100.098	-40.1001	-108.643	-40.1001	-125.122	-40.0696	-111.084	-40.0696	-113.525	-40.1001	-143.433	-40.1001	-125.732	-40.1001	-128.784	-40.1001
0.4495	-83.6182	-40.1306	-61.6455	-40.1001	-78.7354	-40.1001	-77.5146	-40.1306	-87.2803	-40.1611	-104.98	-40.1001	-111.084	-40.0696	-123.291	-40.1001	-90.9424	-40.1001	-91.5527	-40.1306	-126.343	-40.1001	-92.1631	-40.1001	-114.746	-40.1001	-131.226	-40.1306	-106.201	-40.1001	-128.174	-40.1001	-146.484	-40.1001	-134.888	-40.0696	-133.667	-40.1001
0.45	-86.0596	-40.1001	-65.3076	-40.1306	-74.4629	-40.1001	-83.6182	-40.1001	-101.929	-40.1001	-86.6699	-40.1001	-104.98	-40.1001	-112.915	-40.0696	-85.4492	-40.1306	-95.2148	-40.1001	-137.329	-40.1001	-90.9424	-40.0696	-124.512	-40.1001	-121.46	-40.1306	-111.084	-40.1001	-122.07	-40.1001	-157.471	-40.1001	-135.498	-40.0696	-137.329	-40.1001
0.4505	-92.7734	-40.1001	-72.0215	-40.1306	-87.8906	-40.1001	-67.749	-40.1001	-108.032	-40.1001	-95.8252	-40.1001	-115.356	-40.0696	-119.629	-40.1001	-92.1631	-40.1001	-111.694	-40.0696	-115.356	-40.1001	-94.6045	-40.1001	-123.901	-40.1001	-123.291	-40.1306	-104.37	-40.1001	-143.433	-40.1001	-180.054	-40.0696	-131.836	-40.1001	-140.381	-40.1001
0.451	-65.918	-40.1001	-63.4766	-40.1001	-93.9941	-40.1001	-79.9561	-40.1001	-90.332	-40.1001	-99.4873	-40.1001	-122.681	-40.1001	-108.032	-40.1306	-93.9941	-40.1001	-98.877	-40.1001	-115.356	-40.1001	-92.7734	-40.1611	-119.019	-40.1306	-125.732	-40.0696	-107.422	-40.1001	-131.836	-40.1001	-162.354	-40.0696	-137.939	-40.1001	-137.329	-40.1001
0.4515	-89.1113	-40.1306	-72.0215	-40.1001	-76.9043	-40.1001	-83.6182	-40.1001	-83.6182	-40.1001	-98.2666	-40.1001	-103.149	-40.1001	-112.915	-40.1306	-97.6563	-40.1001	-91.5527	-40.1001	-125.122	-40.1001	-89.1113	-40.1001	-122.07	-40.1306	-139.16	-40.1306	-106.201	-40.1001	-136.108	-40.0696	-142.822	-40.1001	-126.343	-40.1306	-158.691	-40.1001
0.452	-90.9424	-40.1306	-77.5146	-40.1306	-86.0596	-40.0696	-98.2666	-40.1001	-90.9424	-40.1001	-95.2148	-40.1001	-107.422	-40.0696	-98.877	-40.1306	-105.591	-40.1001	-103.149	-40.1001	-113.525	-40.1001	-83.6182	-40.1001	-102.539	-40.1001	-149.536	-40.1001	-119.629	-40.0696	-122.681	-40.1306	-145.264	-40.1001	-122.681	-40.1001	-164.185	-40.1306
0.4525	-78.125	-40.1306	-81.1768	-40.1001	-92.1631	-40.1001	-87.8906	-40.0696	-92.7734	-40.1306	-92.1631	-40.1001	-115.967	-40.1001	-119.629	-40.1001	-91.5527	-40.0696	-98.877	-40.0696	-122.681	-40.1306	-92.1631	-40.1001	-103.149	-40.1306	-123.901	-40.1001	-126.343	-40.1001	-140.991	-40.1001	-153.198	-40.1001	-133.057	-40.1001	-158.081	-40.1001
0.453	-73.8525	-40.1001	-79.3457	-40.1306	-87.2803	-40.0696	-75.0732	-40.1001	-108.032	-40.1001	-95.2148	-40.1001	-95.8252	-40.1306	-130.615	-40.1001	-94.6045	-40.1001	-110.474	-40.1001	-100.708	-40.0696	-108.032	-40.1001	-118.408	-40.0696	-131.836	-40.1306	-111.694	-40.1001	-137.939	-40.1001	-150.146	-40.1001	-130.615	-40.1306	-151.367	-40.1306
0.4535	-78.7354	-40.1306	-70.8008	-40.1001	-81.7871	-40.1306	-93.9941	-40.1001	-92.1631	-40.1001	-97.0459	-40.1001	-98.877	-40.0391	-133.667	-40.1306	-108.643	-40.1306	-99.4873	-40.0696	-95.2148	-40.1001	-96.4355	-40.0696	-114.746	-40.1001	-137.939	-40.1306	-114.746	-40.1001	-140.991	-40.0696	-144.043	-40.1306	-137.939	-40.1306	-128.784	-40.1306
0.454	-81.1768	-40.1306	-67.1387	-40.0696	-83.0078	-40.1001	-103.76	-40.1001	-93.9941	-40.1001	-77.5146	-40.1001	-102.539	-40.0696	-112.915	-40.1306	-101.318	-40.0696	-109.863	-40.1306	-87.2803	-40.1001	-104.37	-40.0696	-97.0459	-40.1001	-136.719	-40.1001	-117.798	-40.1001	-131.226	-40.1306	-150.757	-40.1001	-120.239	-40.1001	-151.978	-40.1001
0.4545	-93.3838	-40.1001	-72.6318	-40.1001	-94.6045	-40.1306	-85.4492	-40.1306	-84.8389	-40.1001	-89.7217	-40.1001	-98.2666	-40.1001	-119.629	-40.1001	-103.149	-40.1001	-123.291	-40.0696	-102.539	-40.0696	-95.8252	-40.1001	-112.305	-40.1001	-122.681	-40.1001	-108.032	-40.0696	-153.198	-40.1001	-147.705	-40.0696	-127.563	-40.1001	-171.509	-40.1306
0.455	-80.5664	-40.1001	-75.6836	-40.1306	-80.5664	-40.1001	-89.1113	-40.0696	-95.8252	-40.0696	-84.8389	-40.1001	-109.253	-40.1001	-103.149	-40.1306	-93.3838	-40.1001	-113.525	-40.0391	-123.291	-40.1001	-97.6563	-40.1001	-100.708	-40.1001	-134.277	-40.1001	-115.356	-40.1001	-136.108	-40.0696	-144.653	-40.0696	-137.329	-40.1001	-144.653	-40.1001
0.4555	-82.3975	-40.1306	-67.1387	-40.0696	-92.1631	-40.0696	-103.149	-40.0696	-98.2666	-40.1001	-86.0596	-40.1001	-99.4873	-40.1306	-100.098	-40.1001	-90.332	-40.0696	-93.9941	-40.0696	-107.422	-40.0696	-94.6045	-40.1306	-108.643	-40.1001	-140.991	-40.1306	-106.812	-40.1001	-158.691	-40.0696	-158.081	-40.1001	-128.174	-40.0696	-143.433	-40.1001
0.456	-70.1904	-40.1001	-72.6318	-40.1001	-65.918	-40.1001	-93.9941	-40.1001	-79.3457	-40.1001	-76.2939	-40.1001	-112.305	-40.1306	-112.305	-40.1001	-93.9941	-40.1001	-104.37	-40.1001	-111.694	-40.1001	-89.1113	-40.0696	-95.8252	-40.1001	-132.446	-40.1306	-119.019	-40.1001	-141.602	-40.0696	-140.991	-40.1001	-130.615	-40.0696	-130.005	-40.1306
0.4565	-75.0732	-40.1001	-67.749	-40.1001	-79.9561	-40.1001	-87.2803	-40.1001	-77.5146	-40.1001	-82.3975	-40.1001	-96.4355	-40.0696	-103.76	-40.0696	-92.7734	-40.1001	-123.901	-40.1306	-104.37	-40.1001	-107.422	-40.1001	-115.967	-40.1001	-136.108	-40.1001	-117.798	-40.1306	-150.757	-40.0696	-149.536	-40.1001	-142.212	-40.1001	-147.705	-40.1001
0.457	-75.6836	-40.1001	-66.5283	-40.1306	-78.7354	-40.0696	-97.0459	-40.0696	-84.8389	-40.1001	-79.3457	-40.1001	-100.708	-40.1001	-102.539	-40.1001	-98.2666	-40.1001	-115.356	-40.1001	-129.395	-40.1001	-90.332	-40.0696	-116.577	-40.1001	-145.264	-40.1001	-93.3838	-40.0696	-147.095	-40.1001	-156.86	-40.1001	-126.343	-40.1001	-150.146	-40.1306
0.4575	-59.8145	-40.1306	-60.4248	-40.1001	-83.6182	-40.1001	-87.8906	-40.1001	-95.2148	-40.1306	-78.125	-40.1001	-98.877	-40.1001	-93.9941	-40.1001	-100.098	-40.1001	-122.681	-40.1001	-95.2148	-40.1001	-93.9941	-40.0696	-109.253	-40.1001	-139.16	-40.1001	-115.967	-40.1001	-140.381	-40.1306	-157.471	-40.1001	-124.512	-40.1001	-159.912	-40.1001
0.458	-76.9043	-40.1001	-72.0215	-40.1001	-75.6836	-40.1306	-102.539	-40.1001	-80.5664	-40.1001	-84.2285	-40.0696	-100.098	-40.1001	-81.1768	-40.0696	-85.4492	-40.1001	-114.136	-40.1001	-100.708	-40.1001	-92.7734	-40.1001	-115.967	-40.1001	-123.291	-40.1001	-111.084	-40.1001	-130.005	-40.1001	-143.433	-40.1306	-123.291	-40.0696	-143.433	-40.1001
0.4585	-70.8008	-40.0696	-69.5801	-40.1001	-84.2285	-40.0696	-101.929	-40.1001	-97.0459	-40.1001	-89.1113	-40.1001	-83.6182	-40.1001	-93.3838	-40.1001	-100.708	-40.1001	-111.084	-40.1306	-118.408	-40.1001	-100.708	-40.1001	-103.76	-40.1001	-135.498	-40.1001	-111.694	-40.1001	-125.732	-40.1001	-161.133	-40.1306	-139.16	-40.1001	-139.16	-40.1001
0.459	-93.3838	-40.1306	-78.125	-40.1001	-83.6182	-40.1001	-92.1631	-40.1306	-87.8906	-40.1001	-92.7734	-40.0696	-106.812	-40.1306	-94.6045	-40.1001	-100.708	-40.1001	-118.408	-40.1306	-115.967	-40.1001	-95.2148	-40.1001	-110.474	-40.0696	-144.043	-40.1001	-109.253	-40.1001	-119.019	-40.0696	-150.757	-40.1306	-131.836	-40.0696	-159.302	-40.1001
0.4595	-78.7354	-40.1001	-66.5283	-40.1001	-79.9561	-40.1001	-95.2148	-40.1001	-102.539	-40.1001	-92.1631	-40.1001	-95.2148	-40.1001	-98.2666	-40.1001	-93.3838	-40.1001	-108.643	-40.1001	-109.863	-40.1001	-96.4355	-40.1001	-98.2666	-40.0696	-115.356	-40.0696	-104.98	-40.1001	-125.732	-40.1001	-140.991	-40.1001	-130.005	-40.1001	-144.653	-40.1001
0.46	-70.1904	-40.1001	-61.0352	-40.1001	-82.3975	-40.1001	-98.877	-40.1001	-112.305	-40.1001	-99.4873	-40.1001	-90.332	-40.1001	-90.9424	-40.1001	-90.332	-40.1001	-100.708	-40.0696	-109.253	-40.1001	-89.1113	-40.1001	-89.7217	-40.1001	-124.512	-40.1306	-122.07	-40.1001	-148.926	-40.1001	-149.536	-40.1001	-122.681	-40.1306	-156.25	-40.1001
0.4605	-68.9697	-40.1306	-73.8525	-40.1306	-64.6973	-40.0696	-104.98	-40.1306	-108.643	-40.1001	-97.0459	-40.1001	-103.149	-40.1001	-88.501	-40.1001	-96.4355	-40.1001	-118.408	-40.1306	-115.967	-40.1001	-90.9424	-40.1001	-90.332	-40.1001	-120.85	-40.1306	-109.253	-40.1001	-128.174	-40.0696	-145.874	-40.1001	-134.888	-40.1001	-177.612	-40.1001
0.461	-67.749	-40.1001	-79.3457	-40.1001	-72.0215	-40.1001	-88.501	-40.1306	-109.863	-40.1001	-93.9941	-40.1306	-99.4873	-40.1001	-85.4492	-40.0696	-103.149	-40.0696	-121.46	-40.1001	-110.474	-40.1001	-80.5664	-40.1001	-108.032	-40.1001	-132.446	-40.1001	-103.149	-40.1001	-144.043	-40.1001	-151.367	-40.0696	-136.719	-40.1306	-181.274	-40.1306
0.4615	-76.2939	-40.1001	-73.8525	-40.1001	-69.5801	-40.1001	-97.6563	-40.1001	-90.332	-40.1001	-115.967	-40.1001	-105.591	-40.0696	-91.5527	-40.1001	-77.5146	-40.1001	-111.084	-40.1001	-119.019	-40.1001	-94.6045	-40.1001	-103.76	-40.1001	-130.005	-40.1001	-92.7734	-40.1001	-128.784	-40.1001	-134.277	-40.1001	-131.836	-40.1001	-166.016	-40.1001
0.462	-70.1904	-40.0696	-68.9697	-40.1001	-68.9697	-40.1001	-78.7354	-40.1001	-106.812	-40.1306	-89.7217	-40.1001	-76.9043	-40.0696	-131.836	-40.1001	-87.2803	-40.0696	-118.408	-40.1001	-114.136	-40.1001	-98.2666	-40.0696	-101.318	-40.1306	-134.277	-40.1001	-91.5527	-40.1001	-136.108	-40.1001	-145.264	-40.1001	-126.953	-40.1001	-146.484	-40.1001
0.4625	-69.5801	-40.1001	-85.4492	-40.1001	-54.3213	-40.0696	-83.6182	-40.1001	-106.201	-40.1001	-104.37	-40.1001	-105.591	-40.1001	-120.239	-40.1001	-98.877	-40.1306	-117.798	-40.0696	-115.967	-40.1001	-100.708	-40.1001	-110.474	-40.1001	-147.095	-40.0696	-103.149	-40.1306	-125.732	-40.1001	-147.095	-40.1001	-103.149	-40.1001	-154.419	-40.1001
0.463	-76.9043	-40.1001	-62.2559	-40.1001	-72.0215	-40.0696	-76.2939	-40.1001	-105.591	-40.1001	-101.929	-40.1306	-104.98	-40.1001	-108.032	-40.1001	-97.0459	-40.0696	-119.629	-40.1306	-112.915	-40.1001	-78.125	-40.1001	-114.746	-40.1001	-151.978	-40.1001	-101.318	-40.1001	-121.46	-40.1001	-137.329	-40.1001	-117.188	-40.0696	-162.354	-40.0696
0.4635	-88.501	-40.1001	-75.6836	-40.1306	-81.1768	-40.0696	-98.877	-40.0696	-115.356	-40.1001	-109.863	-40.1001	-111.694	-40.1306	-98.877	-40.1001	-102.539	-40.1001	-122.681	-40.1306	-108.643	-40.1001	-92.1631	-40.0696	-126.953	-40.1001	-145.264	-40.0696	-101.929	-40.1001	-123.291	-40.1001	-128.784	-40.0696	-120.85	-40.1001	-155.029	-40.1001
0.464	-81.1768	-40.1306	-85.4492	-40.1001	-70.1904	-40.1001	-84.2285	-40.1001	-94.6045	-40.0696	-112.915	-40.1001	-99.4873	-40.1001	-94.6045	-40.0696	-77.5146	-40.1001	-119.019	-40.1001	-116.577	-40.1001	-87.8906	-40.1001	-122.681	-40.1001	-159.302	-40.1001	-113.525	-40.1001	-120.85	-40.1001	-135.498	-40.1001	-122.07	-40.1306	-172.119	-40.1001
0.4645	-87.2803	-40.1306	-58.5938	-40.1001	-86.6699	-40.1001	-72.6318	-40.1001	-103.76	-40.1001	-93.3838	-40.1306	-108.032	-40.1001	-82.3975	-40.0696	-85.4492	-40.1306	-123.291	-40.1001	-106.201	-40.1001	-81.7871	-40.1001	-120.85	-40.1001	-140.381	-40.1001	-95.8252	-40.1001	-133.667	-40.1001	-126.343	-40.0696	-104.37	-40.1306	-159.912	-40.1001
0.465	-79.9561	-40.1306	-76.2939	-40.1001	-68.9697	-40.1001	-73.8525	-40.0696	-109.863	-40.1001	-98.877	-40.1001	-94.6045	-40.1001	-92.1631	-40.1001	-92.7734	-40.0696	-112.915	-40.1001	-117.798	-40.0696	-103.76	-40.1001	-106.812	-40.1001	-132.446	-40.0696	-90.9424	-40.1001	-119.019	-40.0696	-131.226	-40.1001	-119.629	-40.1001	-167.847	-40.1001
0.4655	-82.3975	-40.1001	-78.7354	-40.1001	-73.2422	-40.1001	-73.2422	-40.1306	-95.8252	-40.1001	-111.084	-40.1306	-92.1631	-40.1001	-90.9424	-40.1306	-81.7871	-40.1306	-104.37	-40.0696	-119.629	-40.1001	-104.37	-40.1001	-107.422	-40.0696	-134.277	-40.1001	-86.0596	-40.1001	-130.005	-40.1001	-144.043	-40.1001	-136.719	-40.1001	-147.705	-40.1306
0.466	-87.8906	-40.1001	-69.5801	-40.1001	-81.1768	-40.0696	-81.7871	-40.1001	-111.694	-40.1001	-106.201	-40.1001	-106.201	-40.1001	-100.098	-40.1306	-90.332	-40.1001	-92.1631	-40.1001	-109.863	-40.1001	-89.1113	-40.0696	-109.863	-40.1306	-130.615	-40.1306	-99.4873	-40.1001	-120.85	-40.1001	-135.498	-40.1001	-133.057	-40.1306	-147.095	-40.1001
0.4665	-87.8906	-40.1001	-83.0078	-40.1001	-89.1113	-40.1001	-74.4629	-40.1001	-123.901	-40.1001	-105.591	-40.1001	-99.4873	-40.1001	-100.098	-40.1306	-70.1904	-40.0696	-92.7734	-40.1001	-104.98	-40.1001	-86.0596	-40.1001	-105.591	-40.1001	-139.771	-40.1001	-83.0078	-40.1001	-130.615	-40.1001	-133.667	-40.1001	-130.005	-40.0696	-164.185	-40.0696
0.467	-84.2285	-40.1001	-75.0732	-40.1001	-73.8525	-40.0696	-70.1904	-40.1001	-107.422	-40.1001	-96.4355	-40.0696	-101.318	-40.1306	-95.2148	-40.1001	-78.7354	-40.1306	-93.9941	-40.1001	-105.591	-40.1001	-99.4873	-40.1001	-111.694	-40.0696	-139.16	-40.1001	-108.643	-40.1306	-123.901	-40.1001	-126.343	-40.1001	-133.667	-40.1001	-155.64	-40.0696
0.4675	-93.3838	-40.1001	-63.4766	-40.1001	-53.7109	-40.1306	-82.3975	-40.0696	-87.8906	-40.1001	-92.7734	-40.1306	-88.501	-40.1001	-98.877	-40.1001	-81.1768	-40.1001	-95.2148	-40.1001	-100.098	-40.1306	-97.6563	-40.0696	-115.967	-40.1001	-137.329	-40.1001	-100.708	-40.1001	-120.85	-40.1001	-140.381	-40.0696	-125.732	-40.1001	-139.16	-40.0696
0.468	-81.1768	-40.1001	-74.4629	-40.1001	-67.749	-40.1001	-72.6318	-40.1001	-93.9941	-40.1001	-86.6699	-40.1001	-89.7217	-40.1001	-109.253	-40.0696	-73.8525	-40.1001	-87.2803	-40.1001	-108.643	-40.1001	-103.149	-40.1001	-118.408	-40.1001	-143.433	-40.1001	-101.929	-40.1001	-131.226	-40.1001	-144.043	-40.1001	-124.512	-40.0696	-149.536	-40.1001
0.4685	-84.8389	-40.1001	-78.125	-40.1306	-73.8525	-40.1001	-94.6045	-40.1306	-111.084	-40.0696	-100.098	-40.1001	-106.201	-40.1001	-109.863	-40.1001	-93.9941	-40.1001	-93.3838	-40.1001	-113.525	-40.1001	-101.929	-40.1001	-119.019	-40.1001	-135.498	-40.1001	-106.812	-40.1001	-132.446	-40.1001	-150.757	-40.0696	-110.474	-40.1001	-139.16	-40.1306
0.469	-83.0078	-40.1001	-65.918	-40.1001	-68.3594	-40.0696	-79.9561	-40.0696	-114.746	-40.0696	-81.7871	-40.1001	-111.694	-40.0696	-111.084	-40.1001	-97.0459	-40.0696	-103.76	-40.1306	-104.37	-40.1001	-93.9941	-40.1001	-111.694	-40.1001	-139.771	-40.1001	-106.201	-40.1001	-140.991	-40.1001	-157.471	-40.0696	-112.915	-40.1001	-150.146	-40.1001
0.4695	-81.1768	-40.0696	-69.5801	-40.1001	-78.7354	-40.1001	-87.2803	-40.1001	-104.37	-40.1001	-86.0596	-40.1001	-104.98	-40.1001	-98.877	-40.1001	-90.332	-40.0696	-93.3838	-40.1306	-101.318	-40.0696	-81.7871	-40.1001	-108.032	-40.0696	-126.953	-40.0696	-100.708	-40.1001	-131.226	-40.1001	-162.354	-40.0696	-116.577	-40.1001	-150.146	-40.1001
0.47	-69.5801	-40.1001	-77.5146	-40.1001	-54.3213	-40.1001	-82.3975	-40.0696	-121.46	-40.1001	-84.2285	-40.1001	-95.8252	-40.1001	-100.098	-40.1001	-76.2939	-40.1001	-98.877	-40.1001	-100.098	-40.0696	-95.8252	-40.0696	-124.512	-40.1001	-136.108	-40.1001	-110.474	-40.1306	-142.822	-40.1306	-151.978	-40.1306	-120.85	-40.1001	-153.809	-40.1001
0.4705	-89.7217	-40.1001	-70.1904	-40.1001	-70.1904	-40.1001	-90.9424	-40.1001	-95.2148	-40.1001	-95.2148	-40.1001	-111.694	-40.1001	-111.084	-40.1001	-107.422	-40.1306	-97.0459	-40.1001	-103.149	-40.1306	-96.4355	-40.1001	-108.643	-40.1001	-128.784	-40.1306	-109.253	-40.1306	-142.212	-40.1001	-158.691	-40.1306	-109.253	-40.0696	-164.185	-40.1001
0.471	-72.0215	-40.1001	-86.6699	-40.1306	-68.3594	-40.1001	-70.8008	-40.1001	-106.201	-40.1001	-92.1631	-40.0696	-103.76	-40.1001	-100.098	-40.1001	-101.318	-40.1001	-84.8389	-40.0696	-112.305	-40.1001	-81.1768	-40.1001	-114.136	-40.1001	-155.029	-40.1001	-111.084	-40.1001	-147.095	-40.1001	-164.795	-40.1001	-118.408	-40.1001	-158.081	-40.1001
0.4715	-80.5664	-40.1306	-68.3594	-40.1001	-81.1768	-40.1001	-75.6836	-40.1001	-89.7217	-40.1001	-91.5527	-40.1306	-83.0078	-40.1001	-103.149	-40.1001	-86.6699	-40.0696	-90.9424	-40.1001	-109.253	-40.1001	-88.501	-40.0696	-120.85	-40.1001	-150.146	-40.1001	-111.084	-40.1001	-137.939	-40.1001	-171.509	-40.1001	-142.212	-40.1001	-138.55	-40.1001
0.472	-94.6045	-40.1001	-78.125	-40.1001	-83.6182	-40.1306	-81.7871	-40.1001	-93.3838	-40.1001	-77.5146	-40.1306	-101.318	-40.1306	-105.591	-40.1001	-102.539	-40.1001	-101.929	-40.1001	-111.694	-40.1001	-84.2285	-40.0696	-100.708	-40.0696	-149.536	-40.1001	-103.76	-40.1306	-142.212	-40.1001	-155.029	-40.1001	-122.07	-40.1306	-132.446	-40.1001
0.4725	-73.8525	-40.1001	-90.9424	-40.1001	-57.373	-40.1001	-82.3975	-40.1001	-82.3975	-40.1001	-87.2803	-40.1001	-99.4873	-40.1001	-104.37	-40.0696	-95.2148	-40.1001	-103.76	-40.1001	-100.098	-40.1306	-87.2803	-40.1001	-110.474	-40.1306	-134.277	-40.1001	-103.76	-40.1001	-140.381	-40.1001	-149.536	-40.1001	-145.874	-40.1306	-145.264	-40.0696
0.473	-76.2939	-40.1001	-85.4492	-40.1306	-78.7354	-40.1001	-89.1113	-40.1306	-94.6045	-40.1001	-81.1768	-40.1001	-110.474	-40.1001	-120.239	-40.1001	-114.136	-40.1001	-93.9941	-40.1001	-106.812	-40.0696	-70.1904	-40.1001	-113.525	-40.1001	-135.498	-40.1001	-103.76	-40.1001	-151.978	-40.0696	-148.315	-40.1001	-142.822	-40.1306	-128.784	-40.0696
0.4735	-88.501	-40.1001	-76.2939	-40.1306	-70.1904	-40.1306	-81.1768	-40.1001	-89.7217	-40.1001	-83.0078	-40.0696	-110.474	-40.1001	-112.305	-40.0696	-95.2148	-40.0696	-87.2803	-40.0696	-119.019	-40.1001	-73.8525	-40.0696	-97.0459	-40.0696	-131.226	-40.1306	-118.408	-40.1306	-146.484	-40.0696	-141.602	-40.1306	-115.356	-40.1001	-122.681	-40.1306
0.474	-75.6836	-40.1001	-65.918	-40.1306	-79.9561	-40.1306	-71.4111	-40.1306	-82.3975	-40.1001	-84.2285	-40.0391	-111.084	-40.1001	-107.422	-40.1001	-93.9941	-40.1001	-95.2148	-40.1001	-97.6563	-40.0696	-93.9941	-40.0696	-108.643	-40.1001	-147.705	-40.1306	-108.643	-40.1001	-142.822	-40.1306	-170.898	-40.1001	-140.381	-40.1001	-150.757	-40.1306
0.4745	-62.8662	-40.1001	-78.125	-40.1306	-76.9043	-40.0696	-77.5146	-40.1001	-83.0078	-40.1306	-77.5146	-40.1306	-94.6045	-40.1001	-112.915	-40.1306	-93.3838	-40.1001	-117.798	-40.1001	-109.863	-40.0696	-86.0596	-40.0696	-103.149	-40.1001	-119.629	-40.1001	-106.201	-40.1001	-137.329	-40.1001	-161.133	-40.0696	-131.226	-40.0696	-135.498	-40.1001
0.475	-59.8145	-40.1001	-68.9697	-40.1001	-67.1387	-40.1306	-80.5664	-40.1306	-86.6699	-40.0696	-86.6699	-40.1001	-92.7734	-40.1001	-119.629	-40.1001	-97.0459	-40.1001	-108.643	-40.1001	-108.032	-40.0696	-89.1113	-40.0696	-108.643	-40.0696	-155.64	-40.1001	-119.629	-40.1306	-136.719	-40.1306	-149.536	-40.1001	-125.732	-40.1001	-138.55	-40.1001
0.4755	-71.4111	-40.1001	-75.6836	-40.1306	-77.5146	-40.1001	-83.0078	-40.1001	-93.9941	-40.1001	-80.5664	-40.0696	-97.0459	-40.1001	-113.525	-40.1001	-90.9424	-40.1001	-104.37	-40.1001	-119.019	-40.1001	-93.3838	-40.1306	-114.136	-40.1001	-143.433	-40.1306	-115.356	-40.1001	-117.188	-40.1001	-156.25	-40.1306	-126.343	-40.1306	-155.029	-40.1001
0.476	-65.918	-40.1001	-63.4766	-40.1001	-83.0078	-40.1001	-79.3457	-40.1306	-73.2422	-40.1001	-90.332	-40.1306	-93.3838	-40.1306	-118.408	-40.0696	-98.2666	-40.1001	-111.694	-40.1306	-108.643	-40.1001	-97.6563	-40.1001	-98.877	-40.1001	-139.771	-40.1001	-107.422	-40.1001	-131.836	-40.1306	-151.978	-40.1001	-132.446	-40.1306	-121.46	-40.0696
0.4765	-59.2041	-40.1001	-67.1387	-40.1001	-80.5664	-40.0696	-92.1631	-40.1001	-93.3838	-40.0696	-89.1113	-40.1001	-88.501	-40.1001	-108.643	-40.0696	-102.539	-40.1306	-97.0459	-40.1001	-106.812	-40.1001	-85.4492	-40.1001	-109.863	-40.0696	-143.433	-40.1001	-124.512	-40.1306	-130.615	-40.1001	-144.043	-40.1001	-127.563	-40.1306	-134.277	-40.1306
0.477	-85.4492	-40.1306	-70.8008	-40.1001	-80.5664	-40.0696	-71.4111	-40.1001	-101.929	-40.1306	-87.8906	-40.1001	-92.1631	-40.1001	-110.474	-40.1001	-90.332	-40.1001	-94.6045	-40.1001	-129.395	-40.1001	-96.4355	-40.1001	-103.76	-40.1001	-153.198	-40.1001	-104.98	-40.1001	-130.615	-40.0696	-159.912	-40.1306	-116.577	-40.1306	-125.122	-40.1306
0.4775	-57.9834	-40.0696	-66.5283	-40.1001	-81.1768	-40.1306	-70.1904	-40.1001	-92.7734	-40.1306	-76.2939	-40.1306	-101.318	-40.1001	-101.318	-40.1001	-103.149	-40.0696	-126.953	-40.1306	-111.694	-40.1306	-82.3975	-40.1306	-83.6182	-40.1001	-134.277	-40.1306	-114.136	-40.1001	-137.939	-40.1306	-155.64	-40.0696	-132.446	-40.1001	-125.732	-40.1001
0.478	-51.2695	-40.0696	-86.6699	-40.0696	-79.3457	-40.1306	-90.9424	-40.1306	-104.37	-40.1001	-97.6563	-40.1001	-90.332	-40.1001	-88.501	-40.1001	-95.8252	-40.1001	-109.253	-40.0696	-100.708	-40.0391	-68.9697	-40.0696	-77.5146	-40.1001	-142.212	-40.0696	-94.6045	-40.1001	-122.07	-40.1001	-153.198	-40.1001	-125.732	-40.1001	-125.122	-40.1001
0.4785	-59.2041	-40.0696	-59.8145	-40.0696	-76.2939	-40.1306	-76.2939	-40.1001	-107.422	-40.0696	-90.9424	-40.1306	-98.2666	-40.1001	-103.76	-40.1001	-106.812	-40.1001	-104.98	-40.1001	-103.76	-40.1001	-84.2285	-40.1001	-93.9941	-40.1001	-135.498	-40.1001	-98.877	-40.1001	-116.577	-40.1306	-150.757	-40.1306	-125.732	-40.1001	-145.264	-40.1001
0.479	-67.1387	-40.1306	-83.0078	-40.1306	-75.0732	-40.1001	-83.0078	-40.1001	-93.9941	-40.0696	-100.708	-40.1001	-93.3838	-40.1001	-103.149	-40.1001	-84.8389	-40.0696	-108.643	-40.1001	-116.577	-40.1001	-96.4355	-40.1001	-108.643	-40.1001	-137.939	-40.1001	-91.5527	-40.1001	-128.784	-40.1001	-156.86	-40.1001	-139.16	-40.0696	-134.888	-40.1001
0.4795	-72.0215	-40.1001	-67.1387	-40.1001	-81.7871	-40.1001	-74.4629	-40.1001	-81.7871	-40.1001	-85.4492	-40.1001	-89.7217	-40.1001	-97.0459	-40.1001	-93.9941	-40.1306	-100.098	-40.1001	-104.98	-40.1001	-96.4355	-40.1001	-101.929	-40.0696	-137.939	-40.1001	-111.694	-40.1306	-126.343	-40.0696	-137.329	-40.1306	-126.953	-40.1001	-142.822	-40.1001
0.48	-59.8145	-40.1306	-78.125	-40.1001	-77.5146	-40.0696	-85.4492	-40.1306	-93.3838	-40.1001	-99.4873	-40.1001	-100.708	-40.1001	-103.76	-40.1001	-88.501	-40.1001	-104.37	-40.1306	-111.084	-40.1001	-90.9424	-40.1001	-96.4355	-40.1001	-132.446	-40.1001	-104.98	-40.0696	-120.239	-40.0696	-167.236	-40.1001	-140.991	-40.1306	-133.057	-40.1001
0.4805	-72.6318	-40.1001	-70.8008	-40.1001	-72.0215	-40.0696	-89.7217	-40.1001	-101.318	-40.1001	-98.877	-40.1001	-96.4355	-40.1306	-115.356	-40.1001	-100.708	-40.1001	-111.084	-40.1001	-106.201	-40.1001	-93.9941	-40.1001	-89.1113	-40.1001	-133.057	-40.1001	-103.76	-40.1001	-128.174	-40.0696	-157.471	-40.1001	-146.484	-40.1001	-139.16	-40.1001
0.481	-59.2041	-40.1001	-70.1904	-40.1001	-80.5664	-40.1001	-89.7217	-40.1306	-111.694	-40.1306	-108.032	-40.1001	-89.1113	-40.0696	-126.953	-40.1001	-95.8252	-40.1001	-106.201	-40.1001	-113.525	-40.1001	-87.8906	-40.1001	-92.1631	-40.1001	-143.433	-40.0696	-108.032	-40.1001	-123.291	-40.0696	-139.16	-40.1001	-142.212	-40.1001	-146.484	-40.1306
0.4815	-62.8662	-40.0696	-80.5664	-40.1001	-77.5146	-40.1001	-96.4355	-40.0696	-103.149	-40.0696	-111.084	-40.1001	-93.3838	-40.1001	-118.408	-40.1001	-80.5664	-40.1306	-104.37	-40.1001	-126.953	-40.1001	-89.1113	-40.1001	-95.2148	-40.1001	-138.55	-40.1001	-110.474	-40.1306	-126.953	-40.0696	-136.719	-40.1001	-145.264	-40.1001	-137.939	-40.1001
0.482	-61.0352	-40.0696	-84.2285	-40.1001	-68.9697	-40.1001	-81.7871	-40.1001	-87.2803	-40.1001	-95.8252	-40.0696	-98.877	-40.1001	-116.577	-40.1001	-93.9941	-40.0696	-118.408	-40.1001	-123.291	-40.1001	-81.1768	-40.1001	-103.149	-40.1001	-144.653	-40.1001	-102.539	-40.1001	-110.474	-40.1001	-147.095	-40.1001	-134.277	-40.1001	-144.043	-40.1306
0.4825	-55.542	-40.0696	-86.6699	-40.1001	-64.0869	-40.1001	-97.0459	-40.1306	-112.915	-40.1306	-95.8252	-40.1001	-95.2148	-40.1001	-113.525	-40.1001	-97.6563	-40.0696	-109.253	-40.0696	-126.953	-40.1001	-78.7354	-40.1001	-94.6045	-40.1001	-130.005	-40.1001	-111.084	-40.1001	-141.602	-40.1001	-140.381	-40.1001	-145.874	-40.0696	-106.812	-40.1001
0.483	-56.1523	-40.1001	-87.2803	-40.1001	-64.0869	-40.1306	-85.4492	-40.1001	-106.201	-40.1001	-99.4873	-40.1001	-99.4873	-40.1306	-109.253	-40.1001	-81.1768	-40.1001	-119.019	-40.1306	-95.2148	-40.1001	-91.5527	-40.1001	-107.422	-40.1001	-129.395	-40.1001	-99.4873	-40.0696	-111.694	-40.0696	-150.146	-40.1001	-129.395	-40.0696	-117.798	-40.1306
0.4835	-66.5283	-40.1001	-84.8389	-40.1306	-55.542	-40.1306	-90.9424	-40.1306	-109.253	-40.1306	-104.98	-40.1001	-100.098	-40.1001	-106.201	-40.1001	-86.0596	-40.0696	-123.901	-40.1001	-121.46	-40.1306	-91.5527	-40.1306	-80.5664	-40.0696	-134.277	-40.1001	-127.563	-40.1001	-122.07	-40.0696	-152.588	-40.1306	-120.239	-40.0696	-136.719	-40.1001
0.484	-72.6318	-40.1001	-73.8525	-40.1001	-67.749	-40.1001	-83.6182	-40.1001	-106.201	-40.1001	-96.4355	-40.1001	-93.3838	-40.1001	-136.108	-40.0696	-88.501	-40.1001	-113.525	-40.1001	-116.577	-40.1001	-97.6563	-40.1306	-107.422	-40.1001	-126.343	-40.0696	-109.863	-40.1001	-114.746	-40.1001	-131.226	-40.0696	-116.577	-40.1001	-137.939	-40.1001
0.4845	-66.5283	-40.1001	-76.2939	-40.1001	-71.4111	-40.1001	-86.0596	-40.1001	-90.9424	-40.0696	-93.9941	-40.0696	-103.149	-40.1001	-118.408	-40.0696	-86.6699	-40.1001	-101.929	-40.1306	-104.37	-40.1001	-87.2803	-40.1001	-108.032	-40.1001	-123.291	-40.0696	-109.253	-40.1001	-137.939	-40.0696	-131.226	-40.1001	-128.174	-40.1001	-132.446	-40.1306
0.485	-70.8008	-40.1001	-79.3457	-40.1306	-81.7871	-40.1001	-86.6699	-40.0696	-94.6045	-40.1001	-103.149	-40.1306	-102.539	-40.1001	-113.525	-40.1001	-88.501	-40.0696	-109.253	-40.0696	-112.915	-40.1306	-86.0596	-40.1001	-95.2148	-40.0696	-119.629	-40.1001	-110.474	-40.0696	-120.239	-40.1306	-125.732	-40.1306	-114.136	-40.1001	-146.484	-40.1001
0.4855	-67.1387	-40.1001	-70.8008	-40.1001	-68.3594	-40.1001	-98.2666	-40.1001	-86.6699	-40.1306	-103.76	-40.1001	-93.9941	-40.0696	-114.136	-40.1001	-87.2803	-40.1001	-105.591	-40.1306	-108.032	-40.0696	-95.8252	-40.1001	-115.356	-40.1001	-124.512	-40.1001	-106.201	-40.1001	-119.019	-40.1306	-144.043	-40.1001	-113.525	-40.1001	-134.277	-40.1306
0.486	-56.7627	-40.1001	-86.0596	-40.1001	-83.6182	-40.1001	-95.8252	-40.1001	-82.3975	-40.1001	-111.694	-40.1001	-100.708	-40.1001	-111.084	-40.1001	-90.9424	-40.1001	-125.732	-40.0696	-117.798	-40.1001	-98.2666	-40.1001	-106.812	-40.1001	-125.732	-40.0696	-106.812	-40.1001	-112.305	-40.1001	-135.498	-40.1001	-117.798	-40.1001	-136.719	-40.1001
0.4865	-79.3457	-40.1001	-62.2559	-40.1001	-67.1387	-40.0696	-94.6045	-40.1001	-90.332	-40.1001	-111.084	-40.1306	-104.37	-40.1001	-119.629	-40.1306	-96.4355	-40.1001	-107.422	-40.0696	-114.136	-40.1001	-85.4492	-40.1306	-117.798	-40.1001	-126.343	-40.1001	-89.7217	-40.1001	-119.629	-40.1001	-128.174	-40.0696	-118.408	-40.1001	-151.367	-40.1001
0.487	-81.7871	-40.1001	-64.0869	-40.1306	-81.7871	-40.1001	-92.1631	-40.1001	-101.318	-40.1001	-103.149	-40.0696	-112.915	-40.1001	-116.577	-40.1001	-95.8252	-40.1001	-109.253	-40.0696	-120.85	-40.1306	-92.7734	-40.1001	-111.694	-40.1001	-122.07	-40.1001	-108.032	-40.1001	-122.07	-40.1001	-138.55	-40.1001	-125.122	-40.1001	-142.822	-40.0696
0.4875	-68.9697	-40.0696	-59.2041	-40.1306	-54.3213	-40.1001	-84.2285	-40.1001	-100.708	-40.0696	-101.929	-40.1001	-90.9424	-40.1306	-120.85	-40.1001	-90.9424	-40.1306	-109.863	-40.1306	-104.37	-40.1306	-97.6563	-40.1001	-111.084	-40.0696	-134.888	-40.1001	-117.188	-40.1001	-121.46	-40.0696	-127.563	-40.0696	-118.408	-40.0696	-148.315	-40.1001
0.488	-90.332	-40.1306	-60.4248	-40.1306	-74.4629	-40.0696	-86.0596	-40.1001	-91.5527	-40.1306	-96.4355	-40.0696	-100.708	-40.1001	-114.746	-40.1001	-86.6699	-40.1001	-125.732	-40.1001	-103.149	-40.1001	-99.4873	-40.1306	-120.239	-40.1001	-146.484	-40.1001	-106.201	-40.1001	-108.643	-40.1001	-112.915	-40.1306	-126.343	-40.1001	-164.185	-40.0696
0.4885	-74.4629	-40.1306	-66.5283	-40.1001	-58.5938	-40.1001	-85.4492	-40.1611	-88.501	-40.1001	-113.525	-40.1001	-103.149	-40.1611	-122.681	-40.0696	-90.332	-40.0696	-111.694	-40.1001	-124.512	-40.1001	-106.201	-40.1306	-119.019	-40.1306	-145.874	-40.1001	-106.812	-40.0696	-112.305	-40.1001	-122.07	-40.1001	-125.122	-40.1001	-158.081	-40.1001
0.489	-64.6973	-40.1001	-72.6318	-40.1611	-84.2285	-40.1001	-82.3975	-40.1001	-101.318	-40.0696	-103.76	-40.0696	-103.149	-40.1001	-128.174	-40.0696	-86.6699	-40.1001	-115.356	-40.1306	-127.563	-40.1306	-98.2666	-40.1001	-111.694	-40.1001	-144.653	-40.1001	-106.201	-40.0696	-123.291	-40.1306	-137.329	-40.0696	-130.005	-40.1001	-148.315	-40.1001
0.4895	-59.2041	-40.0696	-67.1387	-40.1306	-68.9697	-40.1001	-93.3838	-40.0696	-84.8389	-40.1306	-100.098	-40.1001	-93.9941	-40.1001	-136.108	-40.0696	-76.9043	-40.1306	-104.98	-40.1001	-121.46	-40.0696	-91.5527	-40.1001	-112.915	-40.1611	-142.822	-40.1001	-115.356	-40.1001	-120.239	-40.1001	-139.771	-40.0696	-125.732	-40.1001	-134.888	-40.1306
0.49	-63.4766	-40.1001	-73.8525	-40.1001	-61.0352	-40.1001	-70.8008	-40.1001	-85.4492	-40.1001	-111.694	-40.1306	-90.332	-40.0696	-130.615	-40.1306	-90.332	-40.0696	-108.643	-40.1001	-126.343	-40.1001	-106.812	-40.1001	-107.422	-40.1001	-155.64	-40.1001	-122.681	-40.0696	-112.305	-40.1306	-136.108	-40.0696	-110.474	-40.1001	-149.536	-40.0696
0.4905	-70.8008	-40.1001	-79.3457	-40.0696	-74.4629	-40.1306	-76.2939	-40.1001	-93.9941	-40.1001	-109.863	-40.0696	-109.253	-40.1306	-117.188	-40.0696	-98.2666	-40.1001	-101.929	-40.0696	-117.798	-40.0696	-104.37	-40.1001	-120.239	-40.0696	-148.926	-40.1306	-103.149	-40.1001	-127.563	-40.1001	-148.926	-40.1001	-130.005	-40.1001	-133.057	-40.1001
0.491	-76.9043	-40.1001	-69.5801	-40.1001	-78.7354	-40.1306	-81.7871	-40.0696	-81.7871	-40.0696	-107.422	-40.0696	-98.877	-40.1001	-130.005	-40.1001	-84.8389	-40.1001	-104.98	-40.1001	-122.07	-40.1001	-97.0459	-40.1001	-111.084	-40.1001	-148.315	-40.1001	-108.643	-40.1001	-112.915	-40.1001	-152.588	-40.1001	-123.901	-40.1306	-135.498	-40.0696
0.4915	-65.3076	-40.1306	-75.0732	-40.1001	-74.4629	-40.1001	-78.125	-40.1001	-86.0596	-40.0696	-89.1113	-40.1001	-96.4355	-40.1001	-125.122	-40.1306	-75.6836	-40.0696	-100.708	-40.1001	-106.812	-40.1001	-92.1631	-40.1001	-112.305	-40.1001	-152.588	-40.0696	-112.915	-40.1001	-125.732	-40.0696	-159.302	-40.1001	-132.446	-40.1001	-148.926	-40.1001
0.492	-61.0352	-40.1306	-79.9561	-40.1001	-66.5283	-40.1001	-87.2803	-40.0696	-76.9043	-40.0696	-106.201	-40.0696	-100.098	-40.1611	-106.201	-40.1001	-98.877	-40.1001	-100.708	-40.1001	-130.615	-40.0696	-87.8906	-40.0696	-113.525	-40.1001	-129.395	-40.0696	-105.591	-40.0696	-127.563	-40.1001	-166.626	-40.1001	-133.057	-40.1001	-160.522	-40.1001
0.4925	-57.373	-40.1001	-82.3975	-40.1001	-82.3975	-40.1001	-79.9561	-40.1001	-82.3975	-40.1001	-101.929	-40.0696	-86.0596	-40.1001	-125.122	-40.0696	-96.4355	-40.1001	-99.4873	-40.1001	-116.577	-40.1001	-98.877	-40.1001	-117.798	-40.1001	-134.888	-40.0696	-132.446	-40.1001	-139.16	-40.1306	-174.561	-40.1001	-141.602	-40.1306	-140.991	-40.1001
0.493	-57.9834	-40.1001	-65.918	-40.1001	-70.1904	-40.1001	-91.5527	-40.1306	-87.2803	-40.1001	-102.539	-40.1001	-87.2803	-40.0696	-128.784	-40.1001	-92.7734	-40.0696	-97.0459	-40.1001	-118.408	-40.0696	-108.032	-40.0696	-114.746	-40.1001	-142.822	-40.1306	-112.305	-40.0696	-134.888	-40.1306	-150.146	-40.1001	-140.381	-40.1306	-133.667	-40.1001
0.4935	-54.9316	-40.1001	-83.6182	-40.1001	-73.2422	-40.1001	-99.4873	-40.1001	-86.6699	-40.0696	-104.98	-40.1001	-92.1631	-40.1001	-131.226	-40.0696	-87.2803	-40.0696	-106.812	-40.1001	-103.149	-40.1001	-100.708	-40.1001	-108.032	-40.1001	-145.264	-40.0696	-119.019	-40.1306	-145.874	-40.1001	-158.691	-40.1001	-144.043	-40.1001	-139.16	-40.1001
0.494	-61.6455	-40.1001	-75.6836	-40.0696	-70.1904	-40.1306	-83.6182	-40.1001	-92.7734	-40.1001	-97.0459	-40.0696	-106.201	-40.0696	-136.719	-40.1001	-95.2148	-40.1001	-114.136	-40.1001	-96.4355	-40.0696	-98.877	-40.0696	-119.019	-40.1001	-148.926	-40.1306	-103.149	-40.1001	-143.433	-40.1001	-155.64	-40.1306	-145.264	-40.1001	-142.212	-40.1306
0.4945	-59.2041	-40.1001	-84.8389	-40.0696	-73.8525	-40.1001	-89.1113	-40.1306	-73.2422	-40.1001	-108.643	-40.0696	-89.1113	-40.1001	-140.991	-40.1001	-93.9941	-40.1001	-104.37	-40.1001	-109.253	-40.1306	-90.332	-40.0696	-107.422	-40.1306	-127.563	-40.1001	-113.525	-40.1306	-137.939	-40.1306	-137.329	-40.1001	-133.667	-40.1001	-147.095	-40.0696
0.495	-63.4766	-40.1001	-82.3975	-40.1001	-76.2939	-40.1001	-95.8252	-40.1001	-90.332	-40.1001	-89.7217	-40.1001	-81.7871	-40.1306	-125.732	-40.1001	-95.2148	-40.1001	-105.591	-40.1001	-110.474	-40.1001	-90.9424	-40.1306	-91.5527	-40.0696	-156.25	-40.1001	-124.512	-40.1001	-136.108	-40.1001	-168.457	-40.0696	-134.888	-40.0696	-136.108	-40.1001
0.4955	-53.1006	-40.1001	-94.6045	-40.1001	-78.7354	-40.1306	-95.8252	-40.1306	-95.8252	-40.1001	-84.2285	-40.0696	-84.2285	-40.1001	-118.408	-40.1001	-89.7217	-40.1001	-113.525	-40.1306	-111.084	-40.1001	-88.501	-40.1001	-105.591	-40.1306	-147.095	-40.1001	-118.408	-40.1001	-156.25	-40.1001	-161.743	-40.1001	-131.836	-40.1001	-147.095	-40.1001
0.496	-58.5938	-40.1001	-88.501	-40.1306	-78.7354	-40.1306	-98.2666	-40.1001	-86.0596	-40.1001	-87.8906	-40.0696	-94.6045	-40.1001	-126.953	-40.1001	-92.7734	-40.1001	-108.643	-40.1001	-96.4355	-40.1001	-91.5527	-40.1001	-95.8252	-40.1001	-139.771	-40.1001	-118.408	-40.1001	-145.264	-40.1001	-149.536	-40.1001	-137.329	-40.0696	-153.809	-40.1001
0.4965	-57.373	-40.1306	-76.9043	-40.1001	-65.918	-40.1001	-72.6318	-40.1306	-97.6563	-40.1306	-87.2803	-40.1001	-82.3975	-40.1001	-115.967	-40.0696	-89.1113	-40.1001	-114.136	-40.1001	-112.305	-40.1001	-91.5527	-40.1001	-93.3838	-40.1001	-120.239	-40.1306	-120.239	-40.1306	-145.874	-40.1001	-143.433	-40.1306	-133.057	-40.1001	-139.771	-40.1001
0.497	-56.7627	-40.1001	-68.9697	-40.1001	-65.3076	-40.1306	-78.125	-40.1001	-89.7217	-40.1001	-83.6182	-40.0696	-95.8252	-40.1001	-108.032	-40.1001	-90.9424	-40.1001	-100.708	-40.1001	-121.46	-40.1306	-90.332	-40.1306	-93.3838	-40.0696	-133.667	-40.1001	-122.07	-40.1001	-140.381	-40.1001	-138.55	-40.1001	-138.55	-40.1001	-136.719	-40.1306
0.4975	-59.2041	-40.0696	-67.749	-40.0696	-70.1904	-40.1001	-81.7871	-40.1001	-94.6045	-40.1306	-94.6045	-40.1001	-94.6045	-40.0696	-111.084	-40.1001	-101.318	-40.0696	-103.76	-40.1001	-111.694	-40.1001	-90.9424	-40.1001	-97.6563	-40.1001	-141.602	-40.1306	-127.563	-40.1306	-160.522	-40.1306	-144.043	-40.1306	-128.174	-40.1001	-123.291	-40.1001
0.498	-67.749	-40.1306	-85.4492	-40.1001	-71.4111	-40.1001	-89.7217	-40.1306	-95.2148	-40.1001	-97.0459	-40.1306	-98.2666	-40.1001	-118.408	-40.1001	-111.084	-40.1001	-109.253	-40.1001	-92.7734	-40.1001	-93.3838	-40.1001	-112.305	-40.0696	-126.953	-40.0696	-112.305	-40.1001	-147.095	-40.0696	-142.822	-40.1001	-132.446	-40.1001	-138.55	-40.1001
0.4985	-62.8662	-40.0696	-81.1768	-40.1001	-81.1768	-40.1306	-93.9941	-40.1001	-103.149	-40.1001	-97.6563	-40.1001	-99.4873	-40.1001	-97.0459	-40.1001	-93.9941	-40.1306	-109.253	-40.1001	-114.136	-40.1001	-81.7871	-40.0696	-100.708	-40.0696	-131.836	-40.0696	-119.019	-40.1001	-144.043	-40.1001	-158.081	-40.1001	-134.888	-40.1001	-142.212	-40.1001
0.499	-71.4111	-40.1001	-71.4111	-40.0696	-72.6318	-40.1001	-85.4492	-40.0696	-97.0459	-40.1001	-100.708	-40.1001	-100.708	-40.0696	-104.37	-40.1001	-91.5527	-40.1306	-106.812	-40.0696	-106.201	-40.1001	-97.0459	-40.1306	-101.929	-40.1001	-139.16	-40.1001	-103.149	-40.1001	-120.239	-40.1001	-139.771	-40.1001	-128.784	-40.1001	-132.446	-40.1001
0.4995	-75.6836	-40.1001	-61.0352	-40.0696	-76.9043	-40.1001	-84.2285	-40.1306	-108.643	-40.1306	-86.6699	-40.0696	-92.7734	-40.1306	-109.253	-40.1001	-108.643	-40.1306	-126.953	-40.1306	-102.539	-40.1001	-98.2666	-40.1001	-106.201	-40.1001	-135.498	-40.1306	-126.953	-40.1001	-133.667	-40.1001	-128.784	-40.1001	-114.746	-40.0696	-132.446	-40.1001
0.5	-72.6318	-40.1001	-73.2422	-40.1001	-71.4111	-40.1001	-80.5664	-40.0696	-106.201	-40.1306	-86.0596	-40.1001	-85.4492	-40.1001	-115.967	-40.0696	-104.37	-40.1001	-117.188	-40.1306	-109.253	-40.1001	-96.4355	-40.1001	-100.708	-40.0696	-135.498	-40.1001	-128.784	-40.0696	-126.953	-40.1001	-133.667	-40.1001	-118.408	-40.1306	-136.108	-40.1001
0.5005	-75.0732	-40.0696	-71.4111	-40.1001	-62.8662	-40.0696	-75.6836	-40.1001	-104.37	-40.1001	-88.501	-40.1001	-103.149	-40.1001	-107.422	-40.1001	-93.3838	-40.0696	-103.76	-40.1001	-122.681	-40.1001	-96.4355	-40.0696	-116.577	-40.1001	-115.967	-40.1001	-124.512	-40.1001	-121.46	-40.1001	-145.264	-40.1001	-114.136	-40.1001	-151.978	-40.1306
0.501	-70.8008	-40.1001	-51.2695	-40.1001	-70.1904	-40.1306	-80.5664	-40.1306	-98.877	-40.1306	-89.1113	-40.1001	-73.2422	-40.1001	-104.98	-40.1306	-92.1631	-40.0696	-114.746	-40.1001	-119.629	-40.1001	-89.1113	-40.1001	-84.8389	-40.1001	-139.771	-40.1001	-113.525	-40.0696	-120.239	-40.1001	-151.367	-40.1001	-125.732	-40.1001	-144.043	-40.1306
0.5015	-56.1523	-40.1001	-56.1523	-40.1001	-75.6836	-40.1306	-74.4629	-40.1001	-106.201	-40.1001	-100.098	-40.1001	-87.8906	-40.1001	-97.6563	-40.1001	-86.0596	-40.1306	-133.057	-40.1001	-113.525	-40.1001	-89.7217	-40.1001	-109.253	-40.1001	-145.874	-40.1001	-114.136	-40.0696	-115.356	-40.0696	-152.588	-40.1001	-115.356	-40.0391	-142.822	-40.1306
0.502	-51.8799	-40.1001	-57.373	-40.0696	-62.2559	-40.1306	-75.0732	-40.1001	-107.422	-40.1001	-86.6699	-40.1001	-82.3975	-40.1001	-104.37	-40.1001	-82.3975	-40.1001	-113.525	-40.0696	-106.201	-40.1001	-83.0078	-40.0696	-112.915	-40.1001	-141.602	-40.1306	-116.577	-40.1001	-128.174	-40.1001	-154.419	-40.1306	-119.019	-40.1306	-163.574	-40.1001
0.5025	-61.6455	-40.1001	-61.6455	-40.1001	-69.5801	-40.1001	-72.6318	-40.1306	-106.812	-40.1001	-100.098	-40.1001	-79.3457	-40.1001	-91.5527	-40.0696	-85.4492	-40.1001	-119.629	-40.1001	-108.643	-40.0696	-86.0596	-40.0696	-100.708	-40.1001	-123.901	-40.1001	-107.422	-40.1001	-141.602	-40.1306	-155.029	-40.1001	-114.746	-40.1001	-166.626	-40.1001
0.503	-57.9834	-40.1001	-48.8281	-40.1001	-65.918	-40.1306	-76.9043	-40.1001	-86.6699	-40.1306	-92.7734	-40.1001	-68.9697	-40.1306	-110.474	-40.0696	-73.8525	-40.1001	-119.019	-40.0696	-92.1631	-40.1001	-102.539	-40.1001	-112.305	-40.1001	-128.174	-40.0696	-100.098	-40.1001	-133.667	-40.1001	-137.939	-40.1001	-121.46	-40.0696	-162.354	-40.1001
0.5035	-72.0215	-40.0696	-63.4766	-40.1001	-68.9697	-40.1001	-86.0596	-40.0696	-92.7734	-40.0696	-99.4873	-40.0696	-99.4873	-40.1001	-122.07	-40.1001	-95.2148	-40.1001	-125.732	-40.1001	-101.929	-40.0696	-103.149	-40.1001	-93.9941	-40.1001	-138.55	-40.1001	-102.539	-40.0696	-151.978	-40.1001	-155.64	-40.1001	-103.149	-40.1001	-155.64	-40.1001
0.504	-68.9697	-40.0696	-70.1904	-40.1001	-74.4629	-40.0696	-70.8008	-40.1306	-100.708	-40.1001	-101.929	-40.1001	-97.0459	-40.1306	-126.343	-40.0696	-92.7734	-40.1001	-98.2666	-40.1001	-111.084	-40.1001	-106.812	-40.1001	-110.474	-40.1306	-137.329	-40.1001	-87.2803	-40.0696	-145.264	-40.1001	-167.236	-40.1306	-106.812	-40.1001	-144.653	-40.1001
0.5045	-54.3213	-40.1001	-60.4248	-40.1001	-79.3457	-40.1001	-64.6973	-40.1001	-95.2148	-40.1001	-91.5527	-40.1001	-111.084	-40.1306	-130.005	-40.1001	-88.501	-40.1001	-91.5527	-40.1001	-104.98	-40.1001	-99.4873	-40.1001	-101.929	-40.1001	-151.367	-40.1001	-104.37	-40.1001	-139.771	-40.0696	-160.522	-40.1001	-114.746	-40.1001	-145.264	-40.1001
0.505	-62.2559	-40.1001	-62.8662	-40.0696	-72.6318	-40.0696	-70.1904	-40.0696	-98.877	-40.1001	-89.1113	-40.0696	-101.318	-40.1001	-118.408	-40.1001	-90.332	-40.1001	-100.708	-40.1001	-117.188	-40.1001	-98.2666	-40.1001	-105.591	-40.1001	-116.577	-40.0696	-121.46	-40.1001	-133.057	-40.0696	-147.705	-40.1001	-106.812	-40.1001	-128.784	-40.1306
0.5055	-68.9697	-40.1001	-64.0869	-40.1001	-75.6836	-40.1001	-76.9043	-40.1001	-112.305	-40.1001	-100.098	-40.1306	-112.915	-40.0696	-113.525	-40.1001	-100.708	-40.0696	-106.201	-40.1001	-116.577	-40.1001	-97.0459	-40.1306	-95.8252	-40.1001	-141.602	-40.1001	-101.318	-40.0696	-145.264	-40.1001	-148.926	-40.1306	-103.76	-40.1001	-139.771	-40.1001
0.506	-61.6455	-40.1001	-64.0869	-40.1306	-68.9697	-40.1001	-83.0078	-40.1001	-82.3975	-40.1001	-93.3838	-40.1306	-97.6563	-40.1001	-92.1631	-40.0696	-89.7217	-40.1306	-110.474	-40.0696	-116.577	-40.1001	-98.877	-40.1001	-106.201	-40.1001	-152.588	-40.1001	-101.318	-40.0696	-138.55	-40.1001	-158.081	-40.0696	-111.694	-40.1306	-121.46	-40.1001
0.5065	-70.1904	-40.1001	-70.8008	-40.1001	-78.7354	-40.1001	-86.6699	-40.0696	-86.0596	-40.0696	-88.501	-40.0696	-103.76	-40.1001	-92.7734	-40.1001	-90.9424	-40.1001	-98.877	-40.1001	-126.343	-40.1001	-90.332	-40.1001	-110.474	-40.1306	-152.588	-40.1306	-113.525	-40.1001	-144.653	-40.0696	-144.653	-40.1001	-119.019	-40.1001	-124.512	-40.1001
0.507	-70.1904	-40.1001	-63.4766	-40.1001	-68.3594	-40.1001	-73.8525	-40.1001	-99.4873	-40.1001	-93.3838	-40.1001	-99.4873	-40.1001	-109.863	-40.1306	-92.1631	-40.1001	-100.708	-40.0696	-121.46	-40.1001	-98.877	-40.1001	-109.863	-40.0696	-148.926	-40.1306	-114.746	-40.1001	-156.25	-40.0696	-163.574	-40.0696	-127.563	-40.0696	-150.757	-40.1001
0.5075	-53.7109	-40.1001	-57.9834	-40.1001	-61.6455	-40.1001	-82.3975	-40.0696	-90.332	-40.1001	-100.098	-40.1306	-101.929	-40.1001	-104.98	-40.1001	-104.37	-40.1001	-91.5527	-40.1306	-108.032	-40.1001	-99.4873	-40.1306	-103.149	-40.0696	-152.588	-40.0696	-118.408	-40.1001	-139.16	-40.1001	-154.419	-40.1001	-119.629	-40.1001	-139.16	-40.1306
0.508	-80.5664	-40.1001	-71.4111	-40.1001	-61.0352	-40.1001	-75.6836	-40.0696	-93.9941	-40.0696	-91.5527	-40.1001	-106.812	-40.1306	-120.239	-40.1001	-85.4492	-40.1001	-102.539	-40.0696	-106.812	-40.1001	-92.7734	-40.1001	-115.356	-40.0696	-169.678	-40.1001	-128.784	-40.1001	-142.822	-40.0696	-151.978	-40.1001	-113.525	-40.1001	-149.536	-40.1001
0.5085	-83.0078	-40.1306	-64.6973	-40.1306	-72.0215	-40.1001	-81.7871	-40.1001	-99.4873	-40.1001	-85.4492	-40.1001	-104.98	-40.0696	-105.591	-40.1001	-96.4355	-40.1001	-106.201	-40.0696	-110.474	-40.1001	-107.422	-40.1001	-108.643	-40.1001	-158.081	-40.1306	-114.746	-40.0696	-142.212	-40.0696	-157.471	-40.0696	-100.708	-40.1001	-125.732	-40.1001
0.509	-68.3594	-40.1001	-73.8525	-40.1001	-72.6318	-40.0696	-65.918	-40.1001	-92.7734	-40.1306	-107.422	-40.1306	-109.863	-40.1001	-99.4873	-40.0696	-90.9424	-40.0696	-108.643	-40.1001	-98.877	-40.1001	-115.356	-40.1001	-115.967	-40.0696	-179.443	-40.1001	-114.136	-40.1306	-134.277	-40.1001	-148.315	-40.1001	-120.239	-40.1306	-120.239	-40.1001
0.5095	-65.3076	-40.1001	-75.6836	-40.1001	-59.8145	-40.0696	-65.3076	-40.1001	-97.0459	-40.1001	-104.37	-40.1001	-100.708	-40.1001	-100.098	-40.1001	-78.125	-40.1001	-110.474	-40.1001	-105.591	-40.0696	-87.8906	-40.1001	-98.2666	-40.1306	-168.457	-40.1001	-123.291	-40.1001	-133.667	-40.1001	-140.991	-40.1001	-115.356	-40.1001	-137.939	-40.1306
0.51	-70.8008	-40.1001	-91.5527	-40.1001	-59.8145	-40.1001	-77.5146	-40.1001	-91.5527	-40.1306	-97.6563	-40.0696	-106.201	-40.1001	-103.149	-40.1001	-93.3838	-40.1001	-101.929	-40.1001	-103.76	-40.1001	-82.3975	-40.1001	-111.084	-40.0696	-163.574	-40.1001	-116.577	-40.1001	-136.108	-40.1001	-144.043	-40.1001	-119.629	-40.1001	-143.433	-40.1001
0.5105	-67.1387	-40.1001	-81.7871	-40.1001	-78.125	-40.1306	-72.6318	-40.1001	-78.7354	-40.1001	-91.5527	-40.1001	-108.032	-40.1001	-98.2666	-40.1001	-100.098	-40.0696	-98.2666	-40.1001	-107.422	-40.0696	-95.2148	-40.1001	-106.201	-40.1001	-164.185	-40.0696	-110.474	-40.0696	-148.926	-40.1001	-150.757	-40.1001	-98.877	-40.0696	-131.836	-40.0696
0.511	-77.5146	-40.1001	-66.5283	-40.1001	-75.0732	-40.1001	-75.6836	-40.0696	-79.3457	-40.1001	-95.8252	-40.0696	-114.136	-40.0696	-104.37	-40.1001	-93.3838	-40.1306	-90.332	-40.1001	-111.694	-40.1001	-87.8906	-40.1001	-101.929	-40.1001	-162.354	-40.1001	-117.798	-40.1001	-148.315	-40.1001	-150.146	-40.1001	-100.708	-40.1001	-139.771	-40.0696
0.5115	-72.6318	-40.1001	-82.3975	-40.1001	-64.0869	-40.1001	-72.0215	-40.1001	-81.1768	-40.1001	-93.3838	-40.1001	-89.1113	-40.0696	-99.4873	-40.0696	-99.4873	-40.1001	-109.863	-40.0696	-101.318	-40.1001	-86.6699	-40.1001	-106.201	-40.1001	-133.057	-40.1001	-128.784	-40.0696	-148.315	-40.1001	-155.029	-40.1001	-128.174	-40.1001	-128.784	-40.1001
0.512	-86.0596	-40.1001	-73.2422	-40.1001	-82.3975	-40.1001	-71.4111	-40.1001	-79.3457	-40.1001	-101.318	-40.1306	-85.4492	-40.1306	-108.032	-40.1001	-95.8252	-40.1001	-105.591	-40.1306	-110.474	-40.1306	-91.5527	-40.1001	-100.098	-40.0696	-134.277	-40.1001	-123.901	-40.1001	-141.602	-40.1001	-139.16	-40.1001	-122.07	-40.1306	-158.691	-40.1001
0.5125	-79.9561	-40.1306	-79.9561	-40.1001	-70.1904	-40.1306	-73.8525	-40.0696	-81.1768	-40.1001	-70.1904	-40.1001	-67.749	-40.1001	-117.188	-40.0696	-97.0459	-40.1001	-123.291	-40.1001	-117.188	-40.1001	-95.2148	-40.1001	-102.539	-40.1306	-128.174	-40.1001	-122.07	-40.0696	-143.433	-40.1001	-150.757	-40.1306	-123.291	-40.1306	-145.264	-40.0696
0.513	-76.9043	-40.1001	-79.3457	-40.1001	-78.125	-40.1306	-70.8008	-40.1001	-85.4492	-40.1001	-87.8906	-40.1001	-91.5527	-40.1306	-103.149	-40.1001	-95.2148	-40.0696	-106.201	-40.1306	-103.76	-40.1001	-87.8906	-40.1001	-92.7734	-40.1306	-144.653	-40.1001	-114.746	-40.1001	-142.822	-40.1001	-153.198	-40.1001	-126.343	-40.1306	-142.212	-40.1001
0.5135	-75.0732	-40.0696	-79.9561	-40.1001	-78.125	-40.1001	-93.3838	-40.1306	-88.501	-40.1001	-79.3457	-40.1001	-91.5527	-40.1001	-105.591	-40.1001	-108.032	-40.1001	-102.539	-40.1001	-106.812	-40.1001	-108.643	-40.1001	-99.4873	-40.1306	-137.329	-40.1001	-123.291	-40.0696	-143.433	-40.1001	-148.315	-40.1001	-122.681	-40.1001	-136.719	-40.1001
0.514	-76.2939	-40.1001	-68.9697	-40.1001	-72.0215	-40.1001	-79.3457	-40.1001	-82.3975	-40.1001	-91.5527	-40.1306	-93.9941	-40.1001	-101.929	-40.1001	-89.1113	-40.1001	-114.746	-40.1001	-101.318	-40.0696	-105.591	-40.1306	-108.032	-40.1001	-142.212	-40.1001	-119.019	-40.1001	-129.395	-40.1001	-144.043	-40.1001	-148.315	-40.1001	-144.653	-40.1306
0.5145	-70.8008	-40.1001	-69.5801	-40.1001	-83.0078	-40.0696	-78.125	-40.1001	-88.501	-40.1001	-90.332	-40.1001	-101.929	-40.1001	-106.812	-40.1001	-93.9941	-40.1001	-120.239	-40.0696	-111.694	-40.1001	-87.8906	-40.1001	-106.201	-40.1001	-117.798	-40.1306	-115.356	-40.1001	-129.395	-40.1001	-155.64	-40.1001	-133.057	-40.1001	-150.757	-40.0696
0.515	-72.6318	-40.0696	-73.2422	-40.1001	-69.5801	-40.0696	-95.2148	-40.1001	-84.2285	-40.0696	-87.8906	-40.0696	-89.1113	-40.0696	-95.8252	-40.1001	-106.812	-40.0696	-108.032	-40.1001	-128.784	-40.1001	-103.149	-40.1001	-97.0459	-40.1001	-136.108	-40.1001	-127.563	-40.1306	-142.822	-40.1001	-152.588	-40.1001	-135.498	-40.1306	-148.315	-40.1001
0.5155	-78.125	-40.0696	-65.918	-40.1001	-75.0732	-40.1001	-101.318	-40.1001	-80.5664	-40.1001	-85.4492	-40.1306	-90.9424	-40.1001	-103.149	-40.1001	-97.0459	-40.0696	-115.356	-40.1001	-110.474	-40.1001	-93.9941	-40.1001	-93.9941	-40.0391	-166.016	-40.0696	-112.915	-40.1001	-148.926	-40.1001	-149.536	-40.1001	-126.953	-40.1001	-153.198	-40.1001
0.516	-76.2939	-40.1001	-76.9043	-40.1001	-76.2939	-40.1001	-82.3975	-40.1001	-91.5527	-40.1306	-87.2803	-40.0696	-86.6699	-40.1001	-112.915	-40.1001	-98.877	-40.1001	-112.305	-40.1306	-111.084	-40.1001	-95.8252	-40.0696	-103.76	-40.1001	-141.602	-40.1001	-123.291	-40.1001	-131.836	-40.1001	-158.691	-40.0696	-122.681	-40.0696	-151.978	-40.1001
0.5165	-68.9697	-40.1306	-72.0215	-40.1001	-73.8525	-40.1001	-81.7871	-40.1306	-94.6045	-40.1306	-86.0596	-40.1001	-90.9424	-40.1306	-111.694	-40.1001	-103.149	-40.1001	-115.967	-40.1306	-111.084	-40.1001	-94.6045	-40.1001	-103.149	-40.1001	-148.315	-40.1001	-123.901	-40.1001	-139.771	-40.1306	-164.795	-40.1306	-127.563	-40.1306	-181.885	-40.1001
0.517	-70.1904	-40.1001	-54.3213	-40.1001	-67.1387	-40.1001	-95.8252	-40.1001	-87.2803	-40.0696	-89.7217	-40.1001	-95.2148	-40.0696	-97.0459	-40.0391	-103.149	-40.0696	-118.408	-40.0696	-112.305	-40.0696	-79.9561	-40.0696	-90.9424	-40.1001	-147.095	-40.1001	-121.46	-40.0696	-131.226	-40.1001	-161.133	-40.1001	-120.239	-40.1001	-198.364	-40.1001
0.5175	-73.8525	-40.1306	-52.4902	-40.1001	-70.8008	-40.1001	-83.0078	-40.0696	-87.8906	-40.1001	-89.1113	-40.1001	-90.332	-40.0696	-100.098	-40.1001	-93.9941	-40.1001	-114.746	-40.1001	-117.188	-40.1001	-78.125	-40.1001	-97.6563	-40.1001	-155.64	-40.1001	-126.953	-40.1001	-142.212	-40.1001	-170.898	-40.1001	-130.005	-40.1001	-173.95	-40.1306
0.518	-62.2559	-40.1001	-68.9697	-40.1306	-70.1904	-40.1306	-92.7734	-40.1306	-94.6045	-40.1001	-83.6182	-40.1306	-84.8389	-40.0696	-84.2285	-40.1001	-93.9941	-40.1001	-121.46	-40.1001	-118.408	-40.1001	-98.2666	-40.1306	-104.98	-40.0696	-142.822	-40.0696	-115.967	-40.1001	-150.146	-40.1001	-169.067	-40.1306	-127.563	-40.1001	-151.367	-40.0696
0.5185	-65.3076	-40.0696	-72.6318	-40.1001	-81.7871	-40.1001	-101.318	-40.1001	-117.798	-40.0696	-98.2666	-40.1001	-86.0596	-40.1001	-79.9561	-40.1306	-90.332	-40.1306	-117.798	-40.1001	-114.136	-40.0696	-78.7354	-40.0391	-106.812	-40.0696	-151.978	-40.1001	-123.291	-40.1001	-155.64	-40.1001	-172.119	-40.0696	-125.122	-40.1001	-144.653	-40.1001
0.519	-64.0869	-40.1001	-65.918	-40.0696	-81.1768	-40.1611	-92.7734	-40.0696	-103.76	-40.1001	-100.098	-40.1001	-94.6045	-40.1001	-100.098	-40.1001	-92.1631	-40.1001	-103.76	-40.1001	-97.6563	-40.1001	-93.9941	-40.0696	-109.863	-40.0696	-148.926	-40.1001	-128.174	-40.1001	-159.912	-40.0696	-152.588	-40.0696	-126.343	-40.1001	-147.705	-40.1001
0.5195	-84.8389	-40.0696	-57.9834	-40.0696	-70.1904	-40.1001	-80.5664	-40.1001	-104.98	-40.1001	-95.2148	-40.1001	-87.2803	-40.0696	-106.201	-40.1001	-92.1631	-40.0696	-118.408	-40.1001	-112.305	-40.1001	-76.9043	-40.1306	-110.474	-40.1001	-159.912	-40.1001	-124.512	-40.1001	-162.964	-40.1001	-167.847	-40.1001	-123.291	-40.1001	-157.471	-40.1001
0.52	-70.8008	-40.1306	-71.4111	-40.1306	-89.1113	-40.1306	-89.1113	-40.1306	-91.5527	-40.0696	-98.877	-40.1306	-85.4492	-40.1306	-103.149	-40.1001	-94.6045	-40.1001	-110.474	-40.1306	-99.4873	-40.1001	-83.0078	-40.1306	-111.084	-40.1001	-161.133	-40.0696	-114.136	-40.1001	-135.498	-40.1001	-149.536	-40.0696	-118.408	-40.0696	-146.484	-40.1001
0.5205	-67.749	-40.1001	-68.3594	-40.1001	-78.125	-40.1001	-92.1631	-40.1306	-84.8389	-40.1001	-99.4873	-40.1001	-100.708	-40.0696	-95.2148	-40.1306	-94.6045	-40.1001	-106.812	-40.1001	-112.305	-40.1001	-97.0459	-40.1001	-101.318	-40.1001	-159.912	-40.0696	-119.629	-40.1001	-125.122	-40.0696	-156.86	-40.0696	-128.784	-40.1611	-151.367	-40.1001
0.521	-71.4111	-40.1001	-57.9834	-40.1001	-65.918	-40.1001	-89.1113	-40.1306	-97.0459	-40.1306	-89.1113	-40.1001	-97.0459	-40.0696	-87.2803	-40.1001	-89.7217	-40.0696	-117.798	-40.1306	-127.563	-40.1306	-111.084	-40.1306	-95.8252	-40.1001	-157.471	-40.1306	-111.084	-40.1001	-129.395	-40.1001	-164.795	-40.0696	-137.329	-40.1306	-170.288	-40.1001
0.5215	-65.918	-40.1001	-65.3076	-40.1001	-65.918	-40.1306	-90.9424	-40.1001	-101.929	-40.1001	-88.501	-40.1001	-92.1631	-40.1001	-84.8389	-40.1001	-110.474	-40.0696	-118.408	-40.1001	-109.863	-40.0696	-117.188	-40.1001	-94.6045	-40.1001	-149.536	-40.1306	-112.915	-40.1001	-117.798	-40.1306	-161.743	-40.1001	-127.563	-40.1001	-154.419	-40.1001
0.522	-72.0215	-40.1001	-68.3594	-40.0696	-68.9697	-40.1306	-81.1768	-40.1001	-96.4355	-40.1001	-104.98	-40.1306	-99.4873	-40.1001	-87.8906	-40.1001	-90.332	-40.1001	-123.291	-40.0696	-111.694	-40.1001	-108.032	-40.1306	-103.149	-40.1001	-151.367	-40.1306	-102.539	-40.1001	-130.005	-40.1001	-150.146	-40.1306	-130.615	-40.1001	-145.264	-40.0696
0.5225	-71.4111	-40.0696	-68.3594	-40.1001	-83.0078	-40.1001	-85.4492	-40.1001	-97.6563	-40.1001	-105.591	-40.1001	-104.37	-40.1001	-89.1113	-40.1306	-98.2666	-40.1001	-108.643	-40.1001	-110.474	-40.1001	-95.2148	-40.1001	-95.8252	-40.1001	-145.874	-40.0696	-107.422	-40.1001	-136.108	-40.1001	-169.678	-40.1001	-113.525	-40.1001	-118.408	-40.0696
0.523	-52.4902	-40.1306	-64.6973	-40.1001	-70.8008	-40.0696	-83.0078	-40.1306	-108.032	-40.1001	-87.2803	-40.1001	-91.5527	-40.1001	-84.2285	-40.0696	-96.4355	-40.0696	-109.253	-40.1001	-116.577	-40.1001	-99.4873	-40.1306	-112.305	-40.1001	-117.798	-40.1001	-106.201	-40.0696	-131.836	-40.0696	-155.64	-40.0696	-121.46	-40.1001	-147.095	-40.1001
0.5235	-75.6836	-40.0696	-78.125	-40.1001	-76.2939	-40.1001	-81.1768	-40.1001	-87.2803	-40.1001	-102.539	-40.0696	-98.877	-40.1306	-92.1631	-40.1001	-100.708	-40.1001	-118.408	-40.1306	-98.877	-40.1001	-92.7734	-40.1001	-110.474	-40.0696	-113.525	-40.0696	-106.812	-40.0696	-123.291	-40.0696	-160.522	-40.1306	-135.498	-40.0696	-139.16	-40.0696
0.524	-71.4111	-40.1001	-83.0078	-40.1001	-72.0215	-40.1001	-81.7871	-40.0696	-95.2148	-40.1001	-111.084	-40.1001	-101.929	-40.0696	-94.6045	-40.0696	-88.501	-40.0696	-122.681	-40.1001	-109.863	-40.1001	-100.098	-40.1001	-117.188	-40.1306	-140.381	-40.1306	-111.084	-40.1001	-123.901	-40.1001	-156.86	-40.0696	-118.408	-40.1001	-151.367	-40.1001
0.5245	-59.8145	-40.1306	-71.4111	-40.1001	-76.2939	-40.1001	-83.6182	-40.1001	-92.7734	-40.1001	-90.9424	-40.1306	-90.332	-40.1001	-90.332	-40.1001	-84.2285	-40.1001	-111.084	-40.0696	-111.694	-40.1001	-95.8252	-40.1001	-106.812	-40.1001	-127.563	-40.1001	-109.863	-40.1001	-143.433	-40.1001	-153.198	-40.0696	-125.732	-40.1001	-161.743	-40.1001
0.525	-67.1387	-40.1306	-62.2559	-40.1001	-75.6836	-40.1001	-83.0078	-40.1001	-90.332	-40.1001	-83.0078	-40.1001	-93.9941	-40.0696	-81.7871	-40.1001	-101.929	-40.1001	-101.318	-40.1611	-128.784	-40.1306	-108.643	-40.1001	-105.591	-40.1001	-133.667	-40.0696	-100.708	-40.1001	-119.019	-40.0696	-163.574	-40.1306	-117.188	-40.1001	-153.809	-40.1306
0.5255	-632.324	-80.0476	-469.36	-70.0989	-360.718	-60.0891	-225.22	-50.0793	-102.539	-40.1001	41.5039	-30.0903	175.781	-20.0806	333.862	-10.1013	474.243	-0.12207	628.052	9.8877	790.405	19.8669	949.097	29.8767	1084.59	39.856	1251.83	49.8962	1406.25	59.845	1525.88	69.8547	1659.55	79.834	1785.89	89.8438	1954.35	99.884
0.526	-161.743	-80.0781	-139.771	-70.0989	-137.939	-60.0891	-120.85	-50.1099	-98.2666	-40.1306	-72.0215	-30.1208	-45.7764	-20.0806	-18.9209	-10.1318	-3.66211	-0.0915527	4.88281	9.8877	45.7764	19.8669	76.2939	29.9072	90.9424	39.856	135.498	49.8962	173.95	59.8145	223.999	69.8547	245.972	79.8645	291.748	89.8743	390.015	99.8535
0.5265	-150.757	-80.0476	-122.681	-70.0684	-133.057	-60.0891	-105.591	-50.1099	-76.9043	-40.1001	-93.9941	-30.0903	-55.542	-20.1111	-39.6729	-10.1013	-37.8418	-0.12207	-20.752	9.8877	1.83105	19.8669	26.8555	29.8767	51.8799	39.8865	70.1904	49.8657	111.084	59.845	145.874	69.8547	175.781	79.834	217.285	89.8743	277.71	99.8535
0.527	-142.822	-80.0476	-111.694	-70.0684	-126.343	-60.0891	-103.149	-50.0793	-97.6563	-40.1001	-86.0596	-30.0598	-60.4248	-20.1111	-43.9453	-10.1318	-23.1934	-0.0915527	-29.2969	9.85718	-8.54492	19.8975	12.8174	29.9072	32.3486	39.856	61.6455	49.8962	90.332	59.8755	122.07	69.8853	147.095	79.834	195.923	89.8438	260.01	99.823
0.5275	-146.484	-80.0781	-117.798	-70.0989	-111.694	-60.0586	-104.37	-50.0793	-100.708	-40.0696	-83.0078	-30.0903	-64.6973	-20.1111	-52.4902	-10.1013	-25.6348	-0.0610352	-28.6865	9.85718	-1.83105	19.8975	10.376	29.8462	19.5313	39.8865	55.542	49.8657	68.3594	59.8755	122.07	69.8853	165.405	79.895	186.768	89.8743	250.854	99.8535
0.528	-152.588	-80.0781	-111.694	-70.0684	-108.643	-60.0891	-96.4355	-50.0793	-86.0596	-40.0696	-86.0596	-30.0903	-63.4766	-20.1111	-46.3867	-10.1013	-26.2451	-0.0915527	-32.3486	9.85718	-10.376	19.8669	-4.88281	29.8767	9.76563	39.8865	36.6211	49.8657	59.2041	59.8755	121.46	69.8547	159.912	79.834	162.964	89.8438	228.882	99.8535
0.5285	-154.419	-80.0781	-115.356	-70.0989	-123.291	-60.0586	-120.239	-50.0793	-94.6045	-40.0696	-103.76	-30.0598	-67.749	-20.1111	-54.9316	-10.1013	-31.7383	-0.0915527	-39.6729	9.91821	-18.3105	19.8669	4.27246	29.8767	23.1934	39.856	38.4521	49.8657	53.7109	59.8755	100.708	69.8547	150.757	79.834	164.795	89.8743	219.727	99.8535
0.529	-150.146	-80.0781	-103.76	-70.0989	-117.188	-60.0586	-111.084	-50.0793	-96.4355	-40.1001	-96.4355	-30.0903	-69.5801	-20.0806	-52.4902	-10.1013	-30.5176	-0.0915527	-32.3486	9.8877	-12.207	19.8975	6.71387	29.8767	13.4277	39.8865	45.166	49.8657	53.1006	59.845	98.877	69.8547	138.55	79.834	172.729	89.8743	206.909	99.823
0.5295	-150.757	-80.0781	-113.525	-70.0989	-123.901	-60.0586	-112.915	-50.0793	-104.98	-40.1001	-90.9424	-30.1208	-76.2939	-20.1416	-51.2695	-10.1013	-32.3486	-0.0915527	-32.959	9.8877	-23.8037	19.8975	7.93457	29.8767	15.2588	39.856	33.5693	49.8657	50.6592	59.8755	87.2803	69.8242	131.226	79.8645	180.054	89.8438	213.013	99.8535
0.53	-159.302	-80.0476	-104.37	-70.0684	-104.98	-60.1196	-108.032	-50.0793	-95.8252	-40.0696	-84.2285	-30.0598	-61.6455	-20.1111	-47.6074	-10.1013	-41.5039	-0.12207	-29.2969	9.8877	-16.4795	19.8975	-1.83105	29.9072	2.44141	39.856	40.8936	49.9268	35.4004	59.845	97.0459	69.8547	136.108	79.8645	166.626	89.8743	217.285	99.8535
0.5305	-158.691	-80.0781	-121.46	-70.0989	-100.708	-60.0586	-105.591	-50.0793	-91.5527	-40.1001	-89.1113	-30.0903	-64.0869	-20.1111	-53.7109	-10.1013	-38.4521	-0.0915527	-25.6348	9.8877	-21.9727	19.8975	-13.4277	29.8767	1.2207	39.856	32.959	49.8962	46.9971	59.8145	67.749	69.8547	131.836	79.8645	158.691	89.9048	200.195	99.884
0.531	-163.574	-80.1086	-131.226	-70.0989	-100.708	-60.0891	-108.032	-50.0793	-90.332	-40.1001	-97.6563	-30.0903	-61.6455	-20.1416	-52.4902	-10.0708	-36.6211	-0.0915527	-19.5313	9.8877	-14.0381	19.8975	-7.93457	29.9377	12.207	39.917	29.9072	49.8962	38.4521	59.8755	95.2148	69.8242	125.732	79.8645	162.354	89.8743	215.454	99.8535
0.5315	-159.912	-80.0476	-119.629	-70.0989	-84.2285	-60.0891	-120.85	-50.0793	-72.6318	-40.1001	-108.032	-30.0598	-53.7109	-20.1111	-55.542	-10.1013	-36.6211	-0.12207	-28.6865	9.8877	-17.0898	19.8669	-1.2207	29.8767	6.71387	39.8865	28.6865	49.8657	28.0762	59.8755	71.4111	69.8853	115.356	79.834	151.978	89.8438	214.233	99.8535
0.532	-153.198	-80.0781	-112.305	-70.0989	-104.98	-60.0891	-101.318	-50.0793	-79.3457	-40.1001	-88.501	-30.1208	-67.1387	-20.1111	-71.4111	-10.0708	-46.3867	-0.12207	-24.4141	9.8877	-21.3623	19.8975	0	29.8767	20.752	39.8865	23.8037	49.8657	30.5176	59.8755	88.501	69.8853	117.188	79.8645	165.405	89.8743	200.806	99.8535
0.5325	-144.043	-80.1086	-113.525	-70.0684	-119.019	-60.0891	-103.76	-50.0793	-89.7217	-40.0696	-88.501	-30.0903	-67.749	-20.1111	-68.9697	-10.0708	-53.7109	-0.12207	-30.5176	9.8877	-10.9863	19.8975	-3.66211	29.9072	4.88281	39.856	23.8037	49.8657	25.0244	59.8755	85.4492	69.8547	109.253	79.8645	152.588	89.8743	196.533	99.8535
0.533	-151.367	-80.0476	-119.629	-70.1294	-107.422	-60.1196	-87.2803	-50.0793	-101.318	-40.1001	-83.6182	-30.0903	-54.9316	-20.1111	-55.542	-10.1013	-31.1279	-0.12207	-32.3486	9.91821	-20.1416	19.8669	0.610352	29.8767	7.32422	39.917	27.4658	49.8657	36.0107	59.845	76.2939	69.8547	106.812	79.834	140.381	89.8132	202.026	99.8535
0.5335	-153.809	-80.0476	-142.822	-70.1294	-103.76	-60.0891	-107.422	-50.0793	-95.2148	-40.0696	-71.4111	-30.0903	-70.1904	-20.0806	-43.9453	-10.1013	-36.0107	-0.12207	-32.3486	9.91821	-18.3105	19.8975	-12.207	29.9072	7.32422	39.8865	28.6865	49.8657	24.4141	59.845	79.3457	69.8547	104.37	79.834	144.653	89.8743	191.65	99.8535
0.534	-131.836	-80.0781	-150.146	-70.1294	-97.0459	-60.0891	-97.6563	-50.1099	-83.6182	-40.1001	-86.0596	-30.1208	-70.1904	-20.0806	-56.7627	-10.1318	-32.959	-0.0915527	-29.2969	9.8877	-15.8691	19.8975	-3.05176	29.9072	-3.05176	39.8865	25.0244	49.8962	28.0762	59.845	75.0732	69.8547	105.591	79.8645	140.381	89.8743	192.871	99.8535
0.5345	-150.146	-80.0476	-130.615	-70.0684	-129.395	-60.0586	-102.539	-50.1099	-103.149	-40.1001	-87.8906	-30.0903	-65.918	-20.1111	-59.2041	-10.1318	-42.1143	-0.12207	-40.8936	9.8877	-18.3105	19.8669	-3.05176	29.8767	10.376	39.917	23.1934	49.8657	32.959	59.845	72.0215	69.8547	104.37	79.8645	146.484	89.8438	213.623	99.8535
0.535	-148.315	-80.0476	-142.822	-70.0684	-114.136	-60.0891	-91.5527	-50.0793	-95.8252	-40.0696	-77.5146	-30.0598	-64.6973	-20.1111	-61.0352	-10.1013	-46.3867	-0.12207	-36.0107	9.91821	-16.4795	19.8669	0.610352	29.8767	2.44141	39.8865	24.4141	49.8657	29.9072	59.845	62.2559	69.8853	95.2148	79.834	147.095	89.8438	195.313	99.8535
0.5355	-146.484	-80.0781	-140.991	-70.0989	-103.149	-60.1196	-114.746	-50.1099	-122.681	-40.0696	-77.5146	-30.0903	-66.5283	-20.1416	-59.2041	-10.1013	-40.2832	-0.0610352	-32.959	9.85718	-15.2588	19.928	-14.0381	29.8767	12.8174	39.8865	22.583	49.8657	35.4004	59.8755	73.2422	69.8547	104.98	79.8645	143.433	89.8438	178.833	99.823
0.536	-133.057	-80.0476	-157.471	-70.0989	-114.746	-60.0891	-97.6563	-50.0793	-98.2666	-40.1001	-76.9043	-30.0903	-53.1006	-20.1111	-53.7109	-10.1013	-31.1279	-0.12207	-32.959	9.85718	-14.6484	19.8669	-9.15527	29.9072	17.0898	39.8865	21.9727	49.8962	25.6348	59.8755	73.8525	69.8547	101.318	79.834	155.029	89.8438	190.43	99.823
0.5365	-143.433	-80.0781	-130.615	-70.0989	-108.643	-60.0586	-114.136	-50.1099	-101.929	-40.1306	-69.5801	-30.0598	-70.1904	-20.0806	-36.0107	-10.1013	-37.8418	-0.12207	-37.2314	9.85718	-13.4277	19.8975	-4.27246	29.9072	15.8691	39.8865	27.4658	49.8657	25.6348	59.845	80.5664	69.8547	116.577	79.8645	140.991	89.8743	202.637	99.8535
0.537	-155.029	-80.0476	-137.939	-70.0684	-108.643	-60.1196	-119.019	-50.1099	-92.7734	-40.1306	-81.1768	-30.0903	-50.0488	-20.1111	-48.2178	-10.1013	-50.6592	-0.0915527	-41.5039	9.8877	-18.9209	19.8975	10.9863	29.8462	3.05176	39.856	26.2451	49.8657	40.8936	59.8145	81.1768	69.8242	122.681	79.834	142.822	89.8438	209.351	99.8535
0.5375	-136.108	-80.0476	-151.978	-70.0989	-119.019	-60.0891	-111.694	-50.1404	-106.812	-40.1001	-67.1387	-30.0903	-73.2422	-20.1111	-60.4248	-10.1013	-46.9971	-0.12207	-46.9971	9.85718	-15.2588	19.8669	-3.66211	29.9072	6.71387	39.856	9.15527	49.8962	33.5693	59.845	60.4248	69.8547	120.85	79.834	146.484	89.8743	184.326	99.8535
0.538	-130.615	-80.0476	-142.822	-70.0989	-109.863	-60.0891	-111.084	-50.1099	-95.8252	-40.1001	-76.2939	-30.0598	-75.6836	-20.05	-59.8145	-10.1013	-48.8281	-0.12207	-46.9971	9.8877	-20.1416	19.8975	-6.10352	29.8767	11.5967	39.856	25.0244	49.8962	41.5039	59.8755	70.8008	69.8547	103.149	79.8645	146.484	89.8438	191.65	99.8535
0.5385	-142.822	-80.0781	-150.146	-70.0684	-103.149	-60.0891	-99.4873	-50.0793	-92.1631	-40.1001	-85.4492	-30.0598	-53.7109	-20.0806	-52.4902	-10.1013	-41.5039	-0.0915527	-42.7246	9.8877	-21.9727	19.8975	-1.2207	29.8767	12.8174	39.8865	32.959	49.8657	34.1797	59.8755	64.6973	69.8547	111.694	79.8645	148.315	89.8743	203.857	99.8535
0.539	-157.471	-80.0781	-149.536	-70.0684	-108.032	-60.1196	-114.746	-50.0793	-99.4873	-40.0696	-79.9561	-30.0903	-53.7109	-20.1111	-50.6592	-10.1013	-48.2178	-0.12207	-35.4004	9.8877	-32.959	19.8975	-1.2207	29.8767	9.76563	39.9475	26.2451	49.8657	29.9072	59.845	64.6973	69.8547	114.136	79.8645	145.874	89.9048	203.247	99.8535
0.5395	-150.757	-80.0476	-133.667	-70.0684	-105.591	-60.0891	-107.422	-50.0793	-95.8252	-40.1001	-87.8906	-30.0903	-64.0869	-20.1111	-49.4385	-10.1013	-57.373	-0.0915527	-48.2178	9.85718	-23.1934	19.8669	-5.49316	29.9377	-3.05176	39.8865	23.8037	49.8962	37.2314	59.8755	86.0596	69.8547	106.812	79.834	138.55	89.8132	211.792	99.8535
0.54	-160.522	-80.0781	-137.939	-70.0989	-124.512	-60.0891	-107.422	-50.0793	-92.1631	-40.0696	-73.2422	-30.0903	-57.9834	-20.1416	-50.6592	-10.1013	-37.2314	-0.0610352	-44.5557	9.8877	-23.8037	19.8975	-4.27246	29.8767	5.49316	39.8865	31.1279	49.8657	39.0625	59.8755	72.0215	69.8853	92.1631	79.8645	135.498	89.8438	201.416	99.823
0.5405	-145.264	-80.0476	-137.329	-70.0989	-126.953	-60.0891	-107.422	-50.0793	-97.6563	-40.0696	-78.7354	-30.0903	-70.8008	-20.1111	-50.0488	-10.1013	-49.4385	-0.0915527	-43.9453	9.8877	-21.3623	19.8975	-8.54492	29.9072	11.5967	39.917	32.959	49.8352	32.959	59.8755	67.1387	69.8547	92.7734	79.834	135.498	89.8438	205.688	99.8535
0.541	-145.264	-80.1086	-132.446	-70.0989	-112.305	-60.0891	-119.019	-50.1099	-82.3975	-40.1001	-87.8906	-30.0903	-55.542	-20.1111	-48.8281	-10.1013	-42.7246	-0.12207	-48.8281	9.91821	-36.6211	19.8975	-1.2207	29.9072	7.93457	39.8865	24.4141	49.8657	23.8037	59.845	58.5938	69.8242	112.305	79.8645	139.16	89.8438	198.975	99.884
0.5415	-168.457	-80.0781	-128.784	-70.0989	-120.239	-60.0891	-103.149	-50.1404	-85.4492	-40.1001	-84.8389	-30.0903	-45.7764	-20.0806	-54.9316	-10.0708	-40.8936	-0.0915527	-56.7627	9.85718	-21.3623	19.8669	-3.66211	29.8462	4.88281	39.8865	19.5313	49.8657	34.79	59.845	59.2041	69.8242	102.539	79.8645	130.005	89.8438	197.754	99.8535
0.542	-159.912	-80.0476	-118.408	-70.0989	-110.474	-60.0586	-95.2148	-50.1099	-92.1631	-40.0696	-68.9697	-30.0903	-64.0869	-20.1111	-36.0107	-10.1013	-39.6729	-0.12207	-36.6211	9.8877	-22.583	19.8975	-15.8691	29.8462	6.10352	39.917	21.3623	49.8657	31.7383	59.845	62.8662	69.8242	105.591	79.8645	144.653	89.8743	198.364	99.8535
0.5425	-133.057	-80.0476	-108.643	-70.0684	-104.98	-60.0891	-110.474	-50.0793	-89.7217	-40.1001	-73.2422	-30.1208	-60.4248	-20.0806	-38.4521	-10.0708	-42.1143	-0.12207	-39.6729	9.8877	-31.1279	19.8975	-17.7002	29.8767	11.5967	39.8865	16.4795	49.8657	25.6348	59.845	65.918	69.8547	101.318	79.8645	136.719	89.8743	190.43	99.8535
0.543	-144.043	-80.0781	-120.85	-70.0684	-116.577	-60.0891	-98.2666	-50.0793	-101.929	-40.1001	-79.3457	-30.0903	-71.4111	-20.0806	-51.8799	-10.1013	-36.0107	-0.152588	-39.0625	9.8877	-29.2969	19.928	-26.2451	29.8767	-2.44141	39.917	19.5313	49.8657	29.2969	59.8755	61.6455	69.8547	98.877	79.8645	146.484	89.8743	182.495	99.884
0.5435	-158.081	-80.0476	-127.563	-70.0684	-117.188	-60.0891	-107.422	-50.1099	-95.8252	-40.1001	-80.5664	-30.0903	-71.4111	-20.1111	-45.7764	-10.1013	-34.1797	-0.0915527	-54.9316	9.8877	-20.1416	19.8975	-15.2588	29.8767	17.0898	39.8865	17.0898	49.8657	44.5557	59.8755	67.1387	69.8853	104.37	79.8645	156.86	89.8743	178.833	99.884
0.544	-123.291	-80.0781	-133.667	-70.0684	-115.356	-60.0891	-106.812	-50.0793	-89.7217	-40.1001	-81.7871	-30.0903	-69.5801	-20.1111	-34.1797	-10.0708	-34.1797	-0.0915527	-42.1143	9.85718	-29.9072	19.8975	-11.5967	29.9072	6.10352	39.8865	25.6348	49.8657	50.0488	59.8755	79.9561	69.9158	106.201	79.8645	145.264	89.8438	198.364	99.8535
0.5445	-132.446	-80.1086	-135.498	-70.0989	-119.019	-60.0891	-104.98	-50.0793	-106.812	-40.1306	-82.3975	-30.0903	-70.1904	-20.0806	-50.0488	-10.1013	-47.6074	-0.0915527	-32.959	9.8877	-21.9727	19.8669	-19.5313	29.8767	-2.44141	39.856	18.3105	49.8962	29.9072	59.8755	64.0869	69.8547	109.253	79.834	161.133	89.8132	173.95	99.8535
0.545	-150.757	-80.1086	-111.694	-70.0989	-95.2148	-60.0891	-108.032	-50.1099	-83.6182	-40.1001	-91.5527	-30.1208	-61.0352	-20.0806	-31.1279	-10.1013	-45.166	-0.12207	-43.335	9.85718	-28.6865	19.8669	-10.376	29.8767	2.44141	39.8865	20.1416	49.8657	31.1279	59.845	68.3594	69.8547	113.525	79.834	139.16	89.8438	188.599	99.884
0.5455	-134.888	-80.0781	-133.667	-70.0378	-108.032	-60.1196	-107.422	-50.0793	-89.1113	-40.0696	-89.7217	-30.0903	-79.3457	-20.0806	-37.2314	-10.1013	-32.959	-0.12207	-42.7246	9.8877	-33.5693	19.8975	-12.207	29.9072	6.10352	39.856	27.4658	49.8962	40.2832	59.8145	62.8662	69.8853	121.46	79.834	133.057	89.8438	200.195	99.8535
0.546	-140.381	-80.0171	-134.277	-70.0684	-103.149	-60.0891	-109.863	-50.1099	-91.5527	-40.1306	-90.9424	-30.0903	-88.501	-20.0806	-50.0488	-10.0708	-31.7383	-0.0915527	-27.4658	9.8877	-18.3105	19.8975	-16.4795	29.9072	-1.83105	39.8865	17.0898	49.8962	32.959	59.8755	70.1904	69.8853	119.019	79.8645	131.226	89.8743	189.209	99.8535
0.5465	-149.536	-80.1086	-122.681	-70.0684	-101.929	-60.1196	-89.7217	-50.1099	-83.0078	-40.0696	-89.1113	-30.0903	-72.0215	-20.1111	-51.8799	-10.1013	-51.8799	-0.12207	-36.0107	9.8877	-23.1934	19.8975	-14.0381	29.8462	5.49316	39.8865	29.2969	49.8962	40.8936	59.8755	74.4629	69.8547	117.188	79.8645	137.329	89.9048	190.43	99.884
0.547	-139.771	-80.0476	-114.136	-70.0684	-100.708	-60.1196	-100.708	-50.1099	-92.7734	-40.0391	-91.5527	-30.0598	-69.5801	-20.1111	-60.4248	-10.1013	-29.2969	-0.0915527	-39.0625	9.85718	-15.8691	19.8975	-14.0381	29.8767	-1.83105	39.8865	17.7002	49.8962	43.9453	59.845	79.3457	69.8853	112.305	79.8645	125.732	89.8743	189.209	99.8535
0.5475	-144.043	-80.0781	-141.602	-70.0684	-102.539	-60.0586	-92.1631	-50.0488	-82.3975	-40.0696	-86.6699	-30.0903	-68.3594	-20.1111	-62.8662	-10.1013	-41.5039	-0.12207	-41.5039	9.8877	-24.4141	19.8669	-10.376	29.8767	-3.66211	39.856	15.2588	49.8962	26.8555	59.8145	76.2939	69.8853	124.512	79.8645	146.484	89.8438	204.468	99.884
0.548	-140.991	-80.0781	-139.16	-70.0684	-95.2148	-60.0891	-90.9424	-50.1099	-78.125	-40.1306	-86.6699	-30.1208	-62.2559	-20.1111	-56.7627	-10.1013	-31.1279	-0.0915527	-36.0107	9.8877	-15.2588	19.8975	-9.15527	29.8767	-0.610352	39.917	14.6484	49.8657	37.2314	59.8755	68.3594	69.8853	114.136	79.8645	151.978	89.8743	200.806	99.8535
0.5485	-142.212	-80.0476	-153.198	-70.0989	-101.929	-60.0586	-92.7734	-50.0488	-92.1631	-40.1001	-93.9941	-30.0903	-67.749	-20.1111	-50.6592	-10.1013	-45.166	-0.0915527	-32.3486	9.85718	-29.2969	19.8669	3.05176	29.8767	-2.44141	39.8865	15.8691	49.8962	28.6865	59.845	69.5801	69.8853	106.201	79.8645	147.095	89.8438	197.144	99.823
0.549	-130.005	-80.0476	-125.122	-70.0989	-79.3457	-60.0586	-103.149	-50.1099	-89.7217	-40.1306	-79.9561	-30.0903	-89.7217	-20.05	-56.7627	-10.1318	-43.335	-0.0915527	-40.2832	9.8877	-29.2969	19.8669	-10.9863	29.9072	-7.93457	39.8865	28.0762	49.8657	26.8555	59.845	62.8662	69.8242	103.149	79.834	150.146	89.8438	197.144	99.884
0.5495	-122.681	-80.0781	-128.784	-70.0989	-81.7871	-60.0586	-103.76	-50.0793	-95.2148	-40.1001	-83.6182	-30.1208	-68.3594	-20.1111	-49.4385	-10.1318	-45.166	-0.0915527	-28.0762	9.91821	-21.9727	19.8975	0.610352	29.8767	3.66211	39.8865	9.76563	49.8962	33.5693	59.8755	68.3594	69.8547	97.6563	79.834	151.367	89.8743	195.313	99.8535
0.55	-123.291	-80.0476	-122.07	-70.0989	-106.201	-60.0586	-94.6045	-50.0793	-101.318	-40.0696	-79.9561	-30.0903	-70.1904	-20.1111	-46.3867	-10.1013	-45.7764	-0.12207	-35.4004	9.85718	-14.6484	19.8975	-6.10352	29.9072	-4.27246	39.8865	30.5176	49.8657	37.2314	59.906	64.6973	69.8242	112.915	79.834	146.484	89.8743	221.558	99.8535
0.5505	-122.07	-80.0781	-128.174	-70.0989	-112.915	-60.0281	-82.3975	-50.0488	-87.2803	-40.1001	-73.8525	-30.0598	-86.0596	-20.1111	-60.4248	-10.1013	-48.8281	-0.12207	-37.8418	9.8877	-18.3105	19.8669	-11.5967	29.9072	-2.44141	39.917	20.1416	49.8657	36.6211	59.845	59.8145	69.8242	92.1631	79.8645	151.978	89.8743	205.688	99.8535
0.551	-128.174	-80.0781	-139.771	-70.0684	-105.591	-60.0891	-94.6045	-50.0793	-83.0078	-40.1001	-67.1387	-30.0903	-74.4629	-20.1111	-50.6592	-10.0708	-40.2832	-0.0915527	-30.5176	9.8877	-20.752	19.928	-9.15527	29.8767	9.15527	39.8865	24.4141	49.8657	40.8936	59.845	58.5938	69.8547	98.877	79.8645	143.433	89.8743	202.026	99.8535
0.5515	-123.901	-80.0781	-120.239	-70.0684	-117.188	-60.0586	-93.9941	-50.0793	-85.4492	-40.0696	-69.5801	-30.0598	-68.9697	-20.1111	-56.1523	-10.1013	-37.8418	-0.0915527	-31.1279	9.91821	-23.8037	19.8669	-17.0898	29.9072	5.49316	39.8865	10.9863	49.8657	23.1934	59.845	57.373	69.8853	102.539	79.8645	125.732	89.8132	186.157	99.823
0.552	-161.743	-80.0781	-120.85	-70.0989	-125.732	-60.0891	-100.098	-50.1099	-85.4492	-40.1001	-67.1387	-30.0903	-72.0215	-20.0806	-52.4902	-10.1013	-51.8799	-0.12207	-30.5176	9.85718	-16.4795	19.8975	-4.27246	29.8767	11.5967	39.8865	0.610352	49.8657	37.2314	59.8755	61.0352	69.8853	106.201	79.8035	129.395	89.8743	206.299	99.823
0.5525	-169.678	-80.0781	-115.356	-70.0989	-125.122	-60.0891	-79.9561	-50.1099	-88.501	-40.1001	-67.749	-30.0903	-66.5283	-20.0806	-52.4902	-10.1013	-43.335	-0.0915527	-36.6211	9.8877	-29.2969	19.928	-1.2207	29.9072	-1.83105	39.856	21.9727	49.8962	29.2969	59.8755	63.4766	69.8547	101.318	79.834	128.174	89.8743	203.247	99.823
0.553	-167.236	-80.0781	-133.057	-70.0989	-120.239	-60.0586	-83.0078	-50.0793	-87.8906	-40.1001	-66.5283	-30.0903	-52.4902	-20.1111	-59.2041	-10.1013	-48.2178	-0.12207	-20.1416	9.85718	-15.2588	19.8669	-8.54492	29.8767	-5.49316	39.8865	18.9209	49.8657	29.2969	59.8755	59.8145	69.8547	97.6563	79.8645	139.771	89.8438	204.468	99.8535
0.5535	-163.574	-80.0476	-136.108	-70.0989	-103.149	-60.0891	-105.591	-50.1099	-89.1113	-40.1001	-65.3076	-30.0903	-51.8799	-20.0806	-54.9316	-10.1013	-41.5039	-0.12207	-33.5693	9.91821	-26.2451	19.8975	-12.207	29.9072	-0.610352	39.917	18.9209	49.8657	29.2969	59.845	58.5938	69.8853	96.4355	79.8035	122.681	89.8438	193.481	99.8535
0.554	-144.043	-80.0781	-133.667	-70.0989	-113.525	-60.0891	-93.3838	-50.1099	-81.7871	-40.0696	-72.6318	-30.1208	-73.8525	-20.0806	-53.1006	-10.1318	-45.166	-0.0915527	-37.8418	9.91821	-12.8174	19.8975	-5.49316	29.9072	7.93457	39.856	12.207	49.8657	23.8037	59.845	56.1523	69.8547	94.6045	79.834	131.226	89.8743	186.768	99.884
0.5545	-139.771	-80.0476	-138.55	-70.0684	-105.591	-60.0891	-93.3838	-50.1404	-86.6699	-40.1001	-60.4248	-30.0903	-53.7109	-20.0806	-53.1006	-10.1318	-43.9453	-0.12207	-53.7109	9.8877	-28.0762	19.928	-1.83105	29.8767	3.66211	39.8865	6.71387	49.8962	25.6348	59.8755	61.6455	69.8242	92.1631	79.834	126.343	89.9048	193.481	99.8535
0.555	-156.86	-80.0781	-131.226	-70.0989	-122.07	-60.0891	-101.929	-50.1099	-77.5146	-40.1001	-69.5801	-30.0598	-71.4111	-20.0806	-54.3213	-10.0708	-56.1523	-0.0915527	-26.2451	9.8877	-29.2969	19.8975	-6.71387	29.8767	7.32422	39.8865	21.3623	49.8657	19.5313	59.8755	62.2559	69.8547	97.6563	79.834	132.446	89.8438	203.857	99.8535
0.5555	-164.185	-80.0781	-136.719	-70.0989	-119.629	-60.0586	-100.098	-50.0793	-95.8252	-40.1001	-72.0215	-30.0903	-64.0869	-20.1416	-61.0352	-10.1013	-36.0107	-0.12207	-40.2832	9.91821	-14.6484	19.8975	-9.76563	29.8767	-0.610352	39.8865	20.752	49.8657	32.3486	59.8755	56.1523	69.8547	100.098	79.834	137.939	89.8438	191.04	99.8535
0.556	-150.757	-80.0781	-123.901	-70.0989	-120.85	-60.0891	-108.643	-50.0793	-92.1631	-40.1306	-75.0732	-30.0903	-83.0078	-20.1111	-54.9316	-10.1013	-30.5176	-0.12207	-40.8936	9.85718	-20.1416	19.8975	-3.66211	29.9377	-7.32422	39.8865	18.3105	49.8962	25.0244	59.8755	76.2939	69.8547	99.4873	79.834	125.732	89.8438	186.157	99.8535
0.5565	-150.146	-80.0476	-136.719	-70.0989	-121.46	-60.0891	-89.1113	-50.0793	-100.708	-40.1001	-65.918	-30.0598	-81.1768	-20.1111	-46.3867	-10.0403	-32.3486	-0.12207	-42.1143	9.8877	-18.9209	19.8975	-6.10352	29.8767	-6.71387	39.917	29.9072	49.8657	27.4658	59.845	70.1904	69.8547	92.1631	79.8645	116.577	89.8132	186.768	99.823
0.557	-155.64	-80.0476	-140.991	-70.0684	-106.201	-60.0891	-97.0459	-50.1099	-90.332	-40.0696	-68.9697	-30.1208	-67.749	-20.0806	-37.8418	-10.0708	-42.7246	-0.0915527	-36.6211	9.8877	-21.3623	19.8669	-2.44141	29.9072	2.44141	39.856	20.752	49.8657	34.1797	59.845	73.2422	69.8547	89.7217	79.834	123.901	89.8438	181.885	99.823
0.5575	-162.354	-80.0476	-133.057	-70.0989	-111.694	-60.0891	-116.577	-50.1099	-89.7217	-40.1001	-58.5938	-30.1208	-66.5283	-20.1111	-41.5039	-10.0708	-39.0625	-0.0915527	-47.6074	9.8877	-15.8691	19.8975	-14.6484	29.9072	7.93457	39.917	21.3623	49.8962	32.3486	59.8755	54.9316	69.8547	96.4355	79.834	137.329	89.8743	190.43	99.8535
0.558	-138.55	-80.0476	-125.732	-70.0684	-108.643	-60.0891	-103.76	-50.1099	-97.0459	-40.1001	-72.0215	-30.0903	-66.5283	-20.0806	-56.1523	-10.1013	-47.6074	-0.12207	-50.0488	9.8877	-13.4277	19.8975	1.2207	29.9072	12.207	39.917	14.0381	49.8657	29.9072	59.845	53.7109	69.8853	81.7871	79.8645	131.226	89.8438	197.144	99.823
0.5585	-155.029	-80.0476	-126.343	-70.0989	-122.07	-60.0586	-101.318	-50.0793	-102.539	-40.1001	-67.749	-30.0903	-50.0488	-20.0806	-51.2695	-10.1318	-53.7109	-0.0915527	-50.6592	9.8877	-34.1797	19.8669	11.5967	29.8767	-1.83105	39.856	28.0762	49.8962	34.79	59.845	48.2178	69.8547	99.4873	79.834	136.719	89.8438	200.806	99.8535
0.559	-164.795	-80.0781	-133.667	-70.0989	-107.422	-60.0891	-112.915	-50.0793	-95.2148	-40.1001	-68.9697	-30.0598	-69.5801	-20.1111	-54.3213	-10.0708	-50.6592	-0.12207	-47.6074	9.8877	-28.0762	19.8669	-13.4277	29.9072	17.0898	39.8865	21.9727	49.8657	35.4004	59.8755	67.749	69.8853	89.7217	79.834	135.498	89.8743	169.067	99.8535
0.5595	-155.64	-80.0476	-119.019	-70.0378	-109.253	-60.1196	-124.512	-50.0793	-101.318	-40.0696	-66.5283	-30.0293	-79.9561	-20.1111	-46.9971	-10.0708	-45.7764	-0.12207	-48.8281	9.8877	-19.5313	19.8975	-15.2588	29.8767	6.71387	39.8865	28.6865	49.8657	36.6211	59.8755	60.4248	69.8853	91.5527	79.834	137.939	89.8743	186.768	99.884
0.56	-173.34	-80.0476	-133.667	-70.0684	-115.356	-60.0891	-120.85	-50.1099	-93.3838	-40.1001	-70.8008	-30.0903	-68.3594	-20.0806	-59.8145	-10.1013	-47.6074	-0.12207	-46.9971	9.85718	-32.959	19.8975	-17.7002	29.9072	-2.44141	39.8865	31.1279	49.8657	42.7246	59.845	65.918	69.9158	94.6045	79.834	131.836	89.8438	177.002	99.8535
0.5605	-162.354	-80.0781	-129.395	-70.0989	-112.305	-60.0891	-127.563	-50.1099	-104.98	-40.0696	-75.6836	-30.0903	-73.2422	-20.1111	-52.4902	-10.0708	-33.5693	-0.12207	-42.1143	9.82666	-18.9209	19.8669	-9.15527	29.8767	10.376	39.8865	21.3623	49.8962	37.8418	59.906	66.5283	69.8547	105.591	79.8035	136.719	89.9048	198.975	99.8535
0.561	-160.522	-80.0476	-123.291	-70.0989	-104.98	-60.0891	-112.915	-50.1099	-89.1113	-40.1001	-78.125	-30.0903	-53.1006	-20.0806	-54.3213	-10.0708	-48.8281	-0.0915527	-50.6592	9.8877	-23.8037	19.8669	-13.4277	29.9377	-1.83105	39.856	20.752	49.8962	35.4004	59.8755	57.9834	69.8547	108.643	79.834	140.381	89.8438	164.795	99.8535
0.5615	-177.002	-80.0781	-126.953	-70.0989	-108.643	-60.0891	-126.343	-50.0793	-87.8906	-40.1001	-64.6973	-30.0903	-61.6455	-20.1111	-62.8662	-10.1013	-42.1143	-0.152588	-45.166	9.8877	-21.3623	19.8669	-14.6484	29.8767	4.27246	39.856	17.7002	49.8657	29.2969	59.845	61.0352	69.8547	108.643	79.8645	140.991	89.8438	183.105	99.823
0.562	-168.457	-80.0476	-114.746	-70.0684	-111.694	-60.0891	-112.915	-50.1099	-86.0596	-40.1001	-81.1768	-30.0903	-72.6318	-20.0806	-57.373	-10.0708	-32.3486	-0.0915527	-49.4385	9.8877	-27.4658	19.8975	-15.8691	29.8767	-1.2207	39.8865	18.3105	49.8657	23.8037	59.8755	60.4248	69.8547	105.591	79.8645	138.55	89.8438	180.054	99.884
0.5625	-134.888	-80.0476	-119.019	-70.0684	-97.0459	-60.0891	-108.643	-50.1099	-95.2148	-40.1001	-84.8389	-30.0903	-62.8662	-20.1416	-42.7246	-10.0708	-39.6729	-0.12207	-54.3213	9.8877	-36.0107	19.8975	-14.0381	29.8767	14.0381	39.917	10.376	49.8657	32.3486	59.845	68.9697	69.8547	106.201	79.834	141.602	89.8438	201.416	99.8535
0.563	-140.991	-80.0781	-119.019	-70.0684	-118.408	-60.0891	-113.525	-50.1099	-95.2148	-40.0696	-83.0078	-30.0598	-67.1387	-20.0806	-52.4902	-10.1013	-32.959	-0.12207	-57.9834	9.8877	-17.7002	19.8975	-7.32422	29.9072	8.54492	39.8865	23.8037	49.8657	36.0107	59.8755	65.918	69.9158	106.201	79.8645	133.667	89.8743	191.65	99.884
0.5635	-162.964	-80.0781	-128.174	-70.0989	-108.032	-60.0586	-119.019	-50.1099	-86.0596	-40.1001	-71.4111	-30.0903	-79.3457	-20.1111	-45.166	-10.1013	-40.2832	-0.0915527	-55.542	9.8877	-20.752	19.8669	-4.27246	29.8767	3.05176	39.856	32.959	49.8657	31.7383	59.8755	64.0869	69.8547	94.6045	79.834	136.719	89.8438	186.768	99.8535
0.564	-149.536	-80.1086	-112.305	-70.0989	-110.474	-60.0891	-100.708	-50.1099	-92.7734	-40.0696	-77.5146	-30.0598	-70.1904	-20.0806	-42.7246	-10.0708	-36.0107	-0.0610352	-45.7764	9.85718	-31.1279	19.8669	-17.7002	29.9072	0	39.8865	20.752	49.8962	38.4521	59.845	57.373	69.8547	94.6045	79.8645	123.901	89.8743	180.054	99.884
0.5645	-140.381	-80.0476	-120.239	-70.1294	-100.708	-60.0891	-92.7734	-50.1099	-90.332	-40.1001	-84.2285	-30.0903	-65.918	-20.0806	-51.8799	-10.1013	-34.79	-0.12207	-29.2969	9.85718	-23.1934	19.8669	-8.54492	29.8767	1.2207	39.856	13.4277	49.8962	45.7764	59.8755	68.3594	69.8547	93.3838	79.8645	127.563	89.8132	184.326	99.8535
0.565	-155.029	-80.0171	-108.032	-70.0989	-108.032	-60.1196	-101.318	-50.1099	-98.877	-40.1306	-64.6973	-30.1208	-62.8662	-20.1111	-60.4248	-10.1318	-36.6211	-0.0610352	-40.8936	9.85718	-30.5176	19.8975	-10.9863	29.9072	-4.88281	39.8865	22.583	49.8657	45.7764	59.845	67.749	69.8853	98.877	79.8035	131.836	89.8438	181.885	99.8535
0.5655	-158.691	-80.0476	-117.188	-70.0989	-106.812	-60.0891	-90.332	-50.0793	-89.1113	-40.1001	-77.5146	-30.0903	-62.2559	-20.0806	-39.6729	-10.1013	-28.6865	-0.12207	-47.6074	9.85718	-23.1934	19.8975	-7.93457	29.8767	3.05176	39.8865	26.2451	49.8657	45.166	59.8145	68.9697	69.8547	97.0459	79.8645	132.446	89.8438	184.326	99.8535
0.566	-142.212	-80.0476	-121.46	-70.0684	-101.929	-60.0891	-111.694	-50.1099	-95.2148	-40.1001	-82.3975	-30.0903	-66.5283	-20.0806	-45.166	-10.0708	-29.2969	-0.0915527	-41.5039	9.91821	-38.4521	19.8975	-9.76563	29.9072	-4.27246	39.917	33.5693	49.8962	34.1797	59.845	71.4111	69.8547	102.539	79.8645	128.784	89.8743	181.274	99.8535
0.5665	-138.55	-80.0781	-125.732	-70.0989	-108.032	-60.0891	-92.1631	-50.1099	-101.929	-40.0696	-75.0732	-30.0903	-71.4111	-20.0806	-57.373	-10.1013	-29.2969	-0.0915527	-32.3486	9.8877	-30.5176	19.928	-17.0898	29.9072	6.71387	39.8865	15.2588	49.8962	43.9453	59.8755	68.9697	69.8547	104.98	79.8645	142.822	89.8438	177.612	99.884
0.567	-140.991	-80.0781	-120.239	-70.0684	-109.253	-60.0891	-109.863	-50.0793	-95.2148	-40.1001	-82.3975	-30.0903	-63.4766	-20.1111	-57.373	-10.0708	-26.8555	-0.0610352	-40.2832	9.91821	-35.4004	19.8975	-12.207	29.8767	-3.05176	39.8865	9.76563	49.8657	42.1143	59.845	61.0352	69.8853	106.812	79.8645	144.043	89.8743	182.495	99.8535
0.5675	-140.991	-80.0781	-161.133	-70.0684	-102.539	-60.0586	-94.6045	-50.0793	-97.0459	-40.0696	-81.1768	-30.1208	-71.4111	-20.1111	-62.8662	-10.1013	-31.7383	-0.12207	-43.9453	9.8877	-31.1279	19.8669	-26.8555	29.8767	-4.27246	39.917	27.4658	49.8962	35.4004	59.8755	62.8662	69.8547	117.798	79.8645	138.55	89.8438	190.43	99.8535
0.568	-142.822	-80.0781	-146.484	-70.0684	-95.8252	-60.0586	-85.4492	-50.0793	-114.136	-40.1001	-74.4629	-30.0903	-74.4629	-20.1111	-63.4766	-10.1318	-31.7383	-0.0915527	-39.6729	9.8877	-27.4658	19.8669	-18.3105	29.8767	3.66211	39.8865	14.6484	49.8657	37.2314	59.845	65.3076	69.8853	104.37	79.834	137.329	89.8438	186.768	99.8535
0.5685	-135.498	-80.1086	-131.836	-70.0684	-106.812	-60.0586	-113.525	-50.0793	-106.201	-40.1001	-89.1113	-30.1208	-77.5146	-20.1111	-56.1523	-10.0708	-36.6211	-0.12207	-47.6074	9.85718	-30.5176	19.8975	-17.0898	29.9072	-3.66211	39.917	10.376	49.8962	24.4141	59.8755	57.373	69.8547	111.694	79.8645	150.757	89.8438	192.871	99.8535
0.569	-160.522	-80.0171	-137.939	-70.1294	-98.2666	-60.1196	-97.6563	-50.1099	-103.76	-40.1306	-72.0215	-30.0598	-64.0869	-20.1111	-47.6074	-10.1013	-23.8037	-0.0915527	-55.542	9.8877	-28.0762	19.8975	-15.8691	29.8767	-11.5967	39.8865	19.5313	49.8962	24.4141	59.845	53.7109	69.8853	116.577	79.8645	138.55	89.8438	191.65	99.8535
0.5695	-156.86	-80.0781	-159.302	-70.0989	-90.9424	-60.1196	-103.149	-50.1099	-117.188	-40.1001	-58.5938	-30.0598	-79.9561	-20.0806	-50.6592	-10.1013	-43.9453	-0.0915527	-34.1797	9.91821	-17.7002	19.8975	-5.49316	29.9072	0	39.917	21.3623	49.8657	26.2451	59.845	68.9697	69.8853	105.591	79.834	138.55	89.8743	188.599	99.8535
0.57	-177.612	-80.0781	-148.315	-70.0989	-108.032	-60.0891	-103.76	-50.1099	-111.084	-40.1001	-64.6973	-30.1208	-76.9043	-20.1416	-51.8799	-10.1013	-49.4385	-0.12207	-26.2451	9.8877	-16.4795	19.928	-6.71387	29.9072	4.27246	39.8865	17.7002	49.8962	30.5176	59.8755	64.0869	69.8547	103.76	79.8645	142.822	89.8438	207.52	99.8535
0.5705	-172.119	-80.0171	-134.888	-70.0989	-104.37	-60.1196	-94.6045	-50.0793	-91.5527	-40.1001	-80.5664	-30.0903	-65.918	-20.0806	-53.7109	-10.1013	-34.1797	-0.12207	-25.0244	9.85718	-18.9209	19.8975	-16.4795	29.8462	-7.93457	39.856	17.7002	49.8962	32.3486	59.845	54.9316	69.8547	114.136	79.834	150.146	89.8438	189.209	99.8535
0.571	-155.64	-80.0781	-145.264	-70.0989	-103.149	-60.1196	-123.291	-50.1099	-82.3975	-40.1001	-82.3975	-30.0903	-69.5801	-20.0806	-45.166	-10.1318	-40.8936	-0.12207	-32.959	9.8877	-14.0381	19.8669	-10.9863	29.8767	3.66211	39.856	17.0898	49.8657	28.0762	59.8755	56.1523	69.8853	111.084	79.8645	148.926	89.8743	191.04	99.884
[truncated: 2,057 more rows]

## Sheet: CALHM24 Ca2+ #2
Signals=	IN 0	10_Vm	IN 0	10_Vm	IN 0	10_Vm	IN 0	10_Vm	IN 0	10_Vm	IN 0	10_Vm	IN 0	10_Vm	IN 0	10_Vm	IN 0	10_Vm	IN 0	10_Vm	IN 0	10_Vm	IN 0	10_Vm	IN 0	10_Vm	IN 0	10_Vm	IN 0	10_Vm	IN 0	10_Vm	IN 0	10_Vm	IN 0	10_Vm	IN 0	10_Vm
[truncated: 3,201 more rows]

## Sheet: CALHM24 Ca2+ #3
Signals=	IN 0	10_Vm	IN 0	10_Vm	IN 0	10_Vm	IN 0	10_Vm	IN 0	10_Vm	IN 0	10_Vm	IN 0	10_Vm	IN 0	10_Vm	IN 0	10_Vm	IN 0	10_Vm	IN 0	10_Vm	IN 0	10_Vm	IN 0	10_Vm	IN 0	10_Vm	IN 0	10_Vm	IN 0	10_Vm	IN 0	10_Vm	IN 0	10_Vm	IN 0	10_Vm
[truncated: 3,201 more rows]

[truncated: 15 more sheets: CALHM24 #4, CALHM13 Ca2+ #1, CALHM13 Ca2+ #2, CALHM4 Ca2+ #1, CALHM4 Ca2+ #2, CALHM4 Ca2+ #3, Mock Ca2+ #1, Mock Ca2+ #2, Mock Ca2+ #3, CALHM1 Ca2+ #1, CALHM1 Ca2+ #2, CALHM1 Ca2+ #3, CALHM2 Ca2+ #1, CALHM2 Ca2+ #2, CALHM2 Ca2+ #3]
