# Supplementary material for: Structural features of heteromeric channels composed of CALHM2 and CALHM4 paralogs
Source: eLife. 2024 Jun 18;13:RP96138. doi: 10.7554/eLife.96138 (PMC11186629; doi:10.7554/eLife.96138)
Supplement: Figure 2—figure supplement 1—source data 1. [file elife-96138-fig2-figsupp1-data1.xlsx]

## Sheet: Figure 2-figure supplement 1B
														CALHM4+SbC4			CALHM4
													Volume ml	Absorption		Volume ml	Absorption
													0.00125	0.070095		0.000417	-1.89114
													0.002583	0.072956		0.00175	-1.88398
													0.003917	0.075817		0.003083	-1.87635
													0.00525	0.077724		0.004417	-1.86872
													0.006583	0.078678		0.00575	-1.8611
													0.007917	0.079632		0.007083	-1.8549
													0.00925	0.080109		0.008417	-1.8487
													0.010583	0.080109		0.00975	-1.84345
													0.011917	0.080109		0.011083	-1.83916
													0.01325	0.080109		0.012417	-1.83535
													0.014583	0.079632		0.01375	-1.83249
													0.015917	0.079155		0.015083	-1.83058
													0.01725	0.078678		0.016417	-1.82915
													0.018583	0.078201		0.01775	-1.82819
													0.019917	0.078678		0.019083	-1.82581
													0.02125	0.079632		0.020417	-1.82199
													0.022583	0.080585		0.02175	-1.81675
													0.023917	0.080585		0.023083	-1.81198
													0.02525	0.080585		0.024417	-1.80674
													0.026583	0.081062		0.02575	-1.80197
													0.027917	0.081539		0.027083	-1.79672
													0.02925	0.08297		0.028417	-1.78957
													0.030583	0.0844		0.02975	-1.78146
													0.031917	0.085831		0.031083	-1.7705
													0.03325	0.087261		0.032417	-1.75762
													0.034583	0.088215		0.03375	-1.74427
													0.035917	0.088215		0.035083	-1.73187
													0.03725	0.087261		0.036417	-1.72281
													0.038583	0.086308		0.03775	-1.71661
													0.039917	0.086784		0.039083	-1.71423
													0.04125	0.087738		0.040417	-1.71375
													0.042583	0.089169		0.04175	-1.71566
													0.043917	0.091553		0.043083	-1.71757
													0.04525	0.093937		0.044417	-1.71804
													0.046583	0.096798		0.04575	-1.71709
													0.047917	0.098705		0.047083	-1.7128
													0.04925	0.099659		0.048417	-1.70708
													0.050583	0.100613		0.04975	-1.70088
													0.051917	0.101089		0.051083	-1.69563
													0.05325	0.101089		0.052417	-1.69086
													0.054583	0.100136		0.05375	-1.68705
													0.055917	0.099659		0.055083	-1.68371
													0.05725	0.098705		0.056417	-1.68133
													0.058583	0.097275		0.05775	-1.67847
													0.059917	0.095367		0.059083	-1.67465
													0.06125	0.093937		0.060417	-1.66988
													0.062583	0.09346		0.06175	-1.66368
													0.063917	0.092983		0.063083	-1.65844
													0.06525	0.093937		0.064417	-1.6551
													0.066583	0.094891		0.06575	-1.65224
													0.067917	0.095367		0.067083	-1.64986
													0.06925	0.096321		0.068417	-1.64652
													0.070583	0.096321		0.06975	-1.64318
													0.071917	0.096798		0.071083	-1.63841
													0.07325	0.098228		0.072417	-1.63221
													0.074583	0.099182		0.07375	-1.62554
													0.075917	0.099659		0.075083	-1.62077
													0.07725	0.099659		0.076417	-1.61743
													0.078583	0.099659		0.07775	-1.61505
													0.079917	0.098705		0.079083	-1.61314
													0.08125	0.096798		0.080417	-1.61076
													0.082583	0.094891		0.08175	-1.60789
													0.083917	0.094414		0.083083	-1.60408
													0.08525	0.094891		0.084417	-1.59931
													0.086583	0.095367		0.08575	-1.59359
													0.087917	0.095844		0.087083	-1.58787
													0.08925	0.096321		0.088417	-1.58119
													0.090583	0.096798		0.08975	-1.5707
													0.091917	0.096798		0.091083	-1.55306
													0.09325	0.095844		0.092417	-1.53208
													0.094583	0.095367		0.09375	-1.51396
													0.095917	0.095367		0.095083	-1.50108
													0.09725	0.094891		0.096417	-1.49536
													0.098583	0.094891		0.09775	-1.49488
													0.099917	0.095367		0.099083	-1.50204
													0.10125	0.096798		0.100417	-1.51348
													0.102583	0.099659		0.10175	-1.52397
													0.103917	0.102043		0.103083	-1.53017
													0.10525	0.103951		0.104417	-1.5316
													0.106583	0.104427		0.10575	-1.53065
													0.107917	0.103951		0.107083	-1.52731
													0.10925	0.10252		0.108417	-1.52254
													0.110583	0.100613		0.10975	-1.51587
													0.111917	0.099182		0.111083	-1.50824
													0.11325	0.098705		0.112417	-1.49441
													0.114583	0.099182		0.11375	-1.46866
													0.115917	0.100613		0.115083	-1.43337
													0.11725	0.102043		0.116417	-1.39523
													0.118583	0.102997		0.11775	-1.36423
													0.119917	0.103474		0.119083	-1.34516
													0.12125	0.103951		0.120417	-1.34087
													0.122583	0.102997		0.12175	-1.35326
													0.123917	0.102997		0.123083	-1.37806
													0.12525	0.10252		0.124417	-1.40715
													0.126583	0.102043		0.12575	-1.42908
													0.127917	0.101566		0.127083	-1.43957
													0.12925	0.100613		0.128417	-1.44005
													0.130583	0.101089		0.12975	-1.43576
													0.131917	0.102043		0.131083	-1.43051
													0.13325	0.10252		0.132417	-1.42574
													0.134583	0.102997		0.13375	-1.4205
													0.135917	0.102997		0.135083	-1.41525
													0.13725	0.103474		0.136417	-1.41048
													0.138583	0.104427		0.13775	-1.40572
													0.139917	0.104904		0.139083	-1.40095
													0.14125	0.104904		0.140417	-1.39523
													0.142583	0.104427		0.14175	-1.38998
													0.143917	0.104427		0.143083	-1.38521
													0.14525	0.103951		0.144417	-1.3814
													0.146583	0.103474		0.14575	-1.37663
													0.147917	0.102997		0.147083	-1.37186
													0.14925	0.103951		0.148417	-1.36662
													0.150583	0.105858		0.14975	-1.36089
													0.151917	0.108242		0.151083	-1.35469
													0.15325	0.110626		0.152417	-1.34611
													0.154583	0.112057		0.15375	-1.33181
													0.155917	0.11301		0.155083	-1.31083
													0.15725	0.11301		0.156417	-1.28555
													0.158583	0.11158		0.15775	-1.26123
													0.159917	0.109673		0.159083	-1.24121
													0.16125	0.107765		0.160417	-1.22976
													0.162583	0.106812		0.16175	-1.22833
													0.163917	0.106335		0.163083	-1.23739
													0.16525	0.105858		0.164417	-1.2517
													0.166583	0.105858		0.16575	-1.26314
													0.167917	0.106335		0.167083	-1.266
													0.16925	0.106335		0.168417	-1.26076
													0.170583	0.106812		0.16975	-1.25122
													0.171917	0.106812		0.171083	-1.24168
													0.17325	0.106812		0.172417	-1.23405
													0.174583	0.106335		0.17375	-1.23072
													0.175917	0.105858		0.175083	-1.23215
													0.17725	0.105381		0.176417	-1.23596
													0.178583	0.104904		0.17775	-1.23787
													0.179917	0.103951		0.179083	-1.23644
													0.18125	0.103474		0.180417	-1.23167
													0.182583	0.103951		0.18175	-1.22595
													0.183917	0.104427		0.183083	-1.21927
													0.18525	0.104427		0.184417	-1.21307
													0.186583	0.103951		0.18575	-1.20735
													0.187917	0.104427		0.187083	-1.20258
													0.18925	0.105381		0.188417	-1.19829
													0.190583	0.105858		0.18975	-1.19352
													0.191917	0.106812		0.191083	-1.18685
													0.19325	0.106812		0.192417	-1.18065
													0.194583	0.107288		0.19375	-1.17445
													0.195917	0.107765		0.195083	-1.16825
													0.19725	0.107765		0.196417	-1.1611
													0.198583	0.108242		0.19775	-1.15442
													0.199917	0.108242		0.199083	-1.1487
													0.20125	0.108242		0.200417	-1.14107
													0.202583	0.107765		0.20175	-1.12677
													0.203917	0.106812		0.203083	-1.10674
													0.20525	0.105381		0.204417	-1.0848
													0.206583	0.104904		0.20575	-1.06573
													0.207917	0.105381		0.207083	-1.0519
													0.20925	0.106335		0.208417	-1.0438
													0.210583	0.107288		0.20975	-1.04332
													0.211917	0.108242		0.211083	-1.04952
													0.21325	0.109673		0.212417	-1.05906
													0.214583	0.110149		0.21375	-1.06668
													0.215917	0.109673		0.215083	-1.07002
													0.21725	0.108242		0.216417	-1.0705
													0.218583	0.107288		0.21775	-1.06907
													0.219917	0.105858		0.219083	-1.06668
													0.22125	0.104904		0.220417	-1.06335
													0.222583	0.103474		0.22175	-1.0581
													0.223917	0.102997		0.223083	-1.04761
													0.22525	0.103474		0.224417	-1.03092
													0.226583	0.104427		0.22575	-1.00851
													0.227917	0.105381		0.227083	-0.98658
													0.22925	0.105858		0.228417	-0.96941
													0.230583	0.106335		0.22975	-0.95844
													0.231917	0.106335		0.231083	-0.95606
													0.23325	0.105858		0.232417	-0.96178
													0.234583	0.104904		0.23375	-0.97179
													0.235917	0.104427		0.235083	-0.98038
													0.23725	0.103951		0.236417	-0.98372
													0.238583	0.103474		0.23775	-0.98085
													0.239917	0.10252		0.239083	-0.97418
													0.24125	0.102997		0.240417	-0.96607
													0.242583	0.103474		0.24175	-0.95892
													0.243917	0.103951		0.243083	-0.95081
													0.24525	0.104427		0.244417	-0.93794
													0.246583	0.103951		0.24575	-0.91982
													0.247917	0.103474		0.247083	-0.89931
													0.24925	0.102997		0.248417	-0.8812
													0.250583	0.10252		0.24975	-0.86832
													0.251917	0.102043		0.251083	-0.8626
													0.25325	0.102043		0.252417	-0.86641
													0.254583	0.10252		0.25375	-0.87786
													0.255917	0.102997		0.255083	-0.89025
													0.25725	0.102997		0.256417	-0.89645
													0.258583	0.102997		0.25775	-0.89169
													0.259917	0.10252		0.259083	-0.87738
													0.26125	0.10252		0.260417	-0.8564
													0.262583	0.10252		0.26175	-0.83351
													0.263917	0.10252		0.263083	-0.81205
													0.26525	0.102043		0.264417	-0.79632
													0.266583	0.102043		0.26575	-0.79012
													0.267917	0.101566		0.267083	-0.79203
													0.26925	0.101566		0.268417	-0.80013
													0.270583	0.102043		0.26975	-0.81158
													0.271917	0.102997		0.271083	-0.82302
													0.27325	0.104427		0.272417	-0.8316
													0.274583	0.106335		0.27375	-0.83685
													0.275917	0.107765		0.275083	-0.83923
													0.27725	0.108719		0.276417	-0.8378
													0.278583	0.108719		0.27775	-0.83351
													0.279917	0.108719		0.279083	-0.82445
													0.28125	0.107765		0.280417	-0.80681
													0.282583	0.106812		0.28175	-0.78058
													0.283917	0.105858		0.283083	-0.75197
													0.28525	0.105381		0.284417	-0.72718
													0.286583	0.105381		0.28575	-0.70906
													0.287917	0.104904		0.287083	-0.70095
													0.28925	0.105381		0.288417	-0.7062
													0.290583	0.105381		0.28975	-0.72241
													0.291917	0.105858		0.291083	-0.73814
													0.29325	0.106335		0.292417	-0.74434
													0.294583	0.107288		0.29375	-0.74053
													0.295917	0.108242		0.295083	-0.73051
													0.29725	0.109196		0.296417	-0.71955
													0.298583	0.110149		0.29775	-0.71001
													0.299917	0.111103		0.299083	-0.70715
													0.30125	0.111103		0.300417	-0.71144
													0.302583	0.110149		0.30175	-0.71955
													0.303917	0.108719		0.303083	-0.72813
													0.30525	0.107765		0.304417	-0.7329
													0.306583	0.106812		0.30575	-0.7329
													0.307917	0.105858		0.307083	-0.72956
													0.30925	0.105381		0.308417	-0.72432
													0.310583	0.104904		0.30975	-0.71859
													0.311917	0.104427		0.311083	-0.71287
													0.31325	0.103951		0.312417	-0.70763
													0.314583	0.10252		0.31375	-0.70333
													0.315917	0.102043		0.315083	-0.69904
													0.31725	0.101089		0.316417	-0.69475
													0.318583	0.101089		0.31775	-0.68998
													0.319917	0.101566		0.319083	-0.68378
													0.32125	0.102043		0.320417	-0.67186
													0.322583	0.102997		0.32175	-0.65374
													0.323917	0.103951		0.323083	-0.63324
													0.32525	0.103951		0.324417	-0.61178
													0.326583	0.103951		0.32575	-0.58985
													0.327917	0.102997		0.327083	-0.56982
													0.32925	0.101566		0.328417	-0.5579
													0.330583	0.100136		0.32975	-0.55599
													0.331917	0.099182		0.331083	-0.56219
													0.33325	0.099182		0.332417	-0.57316
													0.334583	0.099659		0.33375	-0.58699
													0.335917	0.100136		0.335083	-0.60177
													0.33725	0.101089		0.336417	-0.61464
													0.338583	0.10252		0.33775	-0.62275
													0.339917	0.103474		0.339083	-0.62609
													0.34125	0.104427		0.340417	-0.62609
													0.342583	0.104904		0.34175	-0.62418
													0.343917	0.105381		0.343083	-0.62132
													0.34525	0.105381		0.344417	-0.6175
													0.346583	0.104904		0.34575	-0.61274
													0.347917	0.104427		0.347083	-0.60749
													0.34925	0.104427		0.348417	-0.60129
													0.350583	0.104427		0.34975	-0.59462
													0.351917	0.104904		0.351083	-0.58889
													0.35325	0.105381		0.352417	-0.58413
													0.354583	0.105858		0.35375	-0.58031
													0.355917	0.106812		0.355083	-0.5765
													0.35725	0.106812		0.356417	-0.57268
													0.358583	0.106335		0.35775	-0.56934
													0.359917	0.105858		0.359083	-0.56505
													0.36125	0.105381		0.360417	-0.55981
													0.362583	0.104904		0.36175	-0.55408
													0.363917	0.103951		0.363083	-0.54884
													0.36525	0.102997		0.364417	-0.54359
													0.366583	0.102043		0.36575	-0.5374
													0.367917	0.101566		0.367083	-0.53167
													0.36925	0.101566		0.368417	-0.52595
													0.370583	0.102043		0.36975	-0.52118
													0.371917	0.102997		0.371083	-0.51641
													0.37325	0.103951		0.372417	-0.5126
													0.374583	0.105381		0.37375	-0.50974
													0.375917	0.106335		0.375083	-0.50831
													0.37725	0.106335		0.376417	-0.50735
													0.378583	0.105381		0.37775	-0.50545
													0.379917	0.104904		0.379083	-0.50354
													0.38125	0.104427		0.380417	-0.49973
													0.382583	0.104427		0.38175	-0.49448
													0.383917	0.104427		0.383083	-0.48828
													0.38525	0.105381		0.384417	-0.48161
													0.386583	0.106335		0.38575	-0.47636
													0.387917	0.106335		0.387083	-0.47159
													0.38925	0.106812		0.388417	-0.46778
													0.390583	0.107288		0.38975	-0.46492
													0.391917	0.107765		0.391083	-0.46301
													0.39325	0.108242		0.392417	-0.46062
													0.394583	0.108242		0.39375	-0.45776
													0.395917	0.107765		0.395083	-0.4549
													0.39725	0.107288		0.396417	-0.45204
													0.398583	0.105858		0.39775	-0.44918
													0.399917	0.104427		0.399083	-0.44584
													0.40125	0.103474		0.400417	-0.44298
													0.402583	0.102043		0.40175	-0.44012
													0.403917	0.101566		0.403083	-0.43726
													0.40525	0.102043		0.404417	-0.43392
													0.406583	0.102997		0.40575	-0.42963
													0.407917	0.104427		0.407083	-0.422
													0.40925	0.105381		0.408417	-0.40865
													0.410583	0.105858		0.40975	-0.39148
													0.411917	0.106812		0.411083	-0.37384
													0.41325	0.107288		0.412417	-0.35763
													0.414583	0.106812		0.41375	-0.34523
													0.415917	0.105858		0.415083	-0.33951
													0.41725	0.105381		0.416417	-0.34237
													0.418583	0.105381		0.41775	-0.35048
													0.419917	0.105381		0.419083	-0.35858
													0.42125	0.105381		0.420417	-0.36526
													0.422583	0.105381		0.42175	-0.36955
													0.423917	0.105381		0.423083	-0.3705
													0.42525	0.104427		0.424417	-0.3686
													0.426583	0.103951		0.42575	-0.36573
													0.427917	0.103474		0.427083	-0.36287
													0.42925	0.102997		0.428417	-0.36049
													0.430583	0.10252		0.42975	-0.35715
													0.431917	0.10252		0.431083	-0.35334
													0.43325	0.102997		0.432417	-0.34904
													0.434583	0.104427		0.43375	-0.34523
													0.435917	0.104904		0.435083	-0.34094
													0.43725	0.105381		0.436417	-0.33712
													0.438583	0.105858		0.43775	-0.33283
													0.439917	0.107765		0.439083	-0.32902
													0.44125	0.109196		0.440417	-0.32473
													0.442583	0.110149		0.44175	-0.32091
													0.443917	0.110626		0.443083	-0.31757
													0.44525	0.111103		0.444417	-0.31424
													0.446583	0.111103		0.44575	-0.31137
													0.447917	0.109196		0.447083	-0.30851
													0.44925	0.107288		0.448417	-0.30565
													0.450583	0.105858		0.44975	-0.30184
													0.451917	0.105381		0.451083	-0.29755
													0.45325	0.105858		0.452417	-0.29373
													0.454583	0.106335		0.45375	-0.29087
													0.455917	0.106812		0.455083	-0.28944
													0.45725	0.106812		0.456417	-0.28801
													0.458583	0.106335		0.45775	-0.28706
													0.459917	0.105858		0.459083	-0.28515
													0.46125	0.104904		0.460417	-0.28276
													0.462583	0.105381		0.46175	-0.28038
													0.463917	0.105858		0.463083	-0.278
													0.46525	0.106812		0.464417	-0.27514
													0.466583	0.107765		0.46575	-0.27227
													0.467917	0.108242		0.467083	-0.26941
													0.46925	0.108719		0.468417	-0.26703
													0.470583	0.109196		0.46975	-0.26512
													0.471917	0.109673		0.471083	-0.26226
													0.47325	0.110149		0.472417	-0.2594
													0.474583	0.110626		0.47375	-0.25749
													0.475917	0.110626		0.475083	-0.25558
													0.47725	0.111103		0.476417	-0.25368
													0.478583	0.11158		0.47775	-0.25129
													0.479917	0.111103		0.479083	-0.24748
													0.48125	0.112057		0.480417	-0.2389
													0.482583	0.11301		0.48175	-0.22364
													0.483917	0.113964		0.483083	-0.20361
													0.48525	0.114918		0.484417	-0.18358
													0.486583	0.116348		0.48575	-0.16785
													0.487917	0.117779		0.487083	-0.15831
													0.48925	0.119209		0.488417	-0.1564
													0.490583	0.120163		0.48975	-0.16356
													0.491917	0.121117		0.491083	-0.17548
													0.49325	0.122547		0.492417	-0.18692
													0.494583	0.123501		0.49375	-0.19503
													0.495917	0.123978		0.495083	-0.19884
													0.49725	0.123978		0.496417	-0.19932
													0.498583	0.124454		0.49775	-0.19836
													0.499917	0.123978		0.499083	-0.19646
													0.50125	0.123024		0.500417	-0.19455
													0.502583	0.12207		0.50175	-0.19264
													0.503917	0.121117		0.503083	-0.19026
													0.50525	0.12064		0.504417	-0.18787
													0.506583	0.120163		0.50575	-0.18549
													0.507917	0.12064		0.507083	-0.18263
													0.50925	0.121593		0.508417	-0.18024
													0.510583	0.12207		0.50975	-0.17786
													0.511917	0.122547		0.511083	-0.17548
													0.51325	0.12207		0.512417	-0.17309
													0.514583	0.121593		0.51375	-0.16975
													0.515917	0.121117		0.515083	-0.16642
													0.51725	0.119686		0.516417	-0.16308
													0.518583	0.118732		0.51775	-0.15974
													0.519917	0.118256		0.519083	-0.15593
													0.52125	0.117779		0.520417	-0.15259
													0.522583	0.117779		0.52175	-0.14973
													0.523917	0.118256		0.523083	-0.14782
													0.52525	0.119209		0.524417	-0.14591
													0.526583	0.119686		0.52575	-0.144
													0.527917	0.119686		0.527083	-0.14162
													0.52925	0.119209		0.528417	-0.13971
													0.530583	0.118732		0.52975	-0.13733
													0.531917	0.117779		0.531083	-0.13447
													0.53325	0.116825		0.532417	-0.13018
													0.534583	0.116348		0.53375	-0.12589
													0.535917	0.115395		0.535083	-0.12159
													0.53725	0.114441		0.536417	-0.11683
													0.538583	0.113487		0.53775	-0.11206
													0.539917	0.11301		0.539083	-0.10681
													0.54125	0.112534		0.540417	-0.10109
													0.542583	0.112057		0.54175	-0.09251
													0.543917	0.112534		0.543083	-0.08059
													0.54525	0.11301		0.544417	-0.06676
													0.546583	0.113487		0.54575	-0.05198
													0.547917	0.114441		0.547083	-0.03719
													0.54925	0.115871		0.548417	-0.02384
													0.550583	0.116825		0.54975	-0.01478
													0.551917	0.118256		0.551083	-0.00954
													0.55325	0.119686		0.552417	-0.00668
													0.554583	0.120163		0.55375	-0.00477
													0.555917	0.120163		0.555083	-0.00334
													0.55725	0.119686		0.556417	-0.00143
													0.558583	0.118732		0.55775	0.000954
													0.559917	0.119209		0.559083	0.002861
													0.56125	0.120163		0.560417	0.004292
													0.562583	0.122547		0.56175	0.004292
													0.563917	0.125885		0.563083	0.004768
													0.56525	0.128269		0.564417	0.005245
													0.566583	0.130653		0.56575	0.006199
													0.567917	0.132084		0.567083	0.007153
													0.56925	0.132561		0.568417	0.00906
													0.570583	0.132084		0.56975	0.011444
													0.571917	0.13113		0.571083	0.013828
													0.57325	0.13113		0.572417	0.016212
													0.574583	0.13113		0.57375	0.019073
													0.575917	0.13113		0.575083	0.021935
													0.57725	0.13113		0.576417	0.025272
													0.578583	0.131607		0.57775	0.02718
													0.579917	0.132561		0.579083	0.029087
													0.58125	0.133514		0.580417	0.031471
													0.582583	0.134468		0.58175	0.033379
													0.583917	0.134945		0.583083	0.03624
													0.58525	0.134945		0.584417	0.039577
													0.586583	0.134945		0.58575	0.042915
													0.587917	0.134945		0.587083	0.046253
													0.58925	0.135422		0.588417	0.048161
													0.590583	0.135422		0.58975	0.049591
													0.591917	0.135422		0.591083	0.050545
													0.59325	0.136852		0.592417	0.051498
													0.594583	0.137329		0.59375	0.052929
													0.595917	0.136375		0.595083	0.054836
													0.59725	0.134945		0.596417	0.05722
													0.598583	0.132561		0.59775	0.060081
													0.599917	0.13113		0.599083	0.061989
													0.60125	0.130177		0.600417	0.062466
													0.602583	0.1297		0.60175	0.063419
													0.603917	0.128746		0.603083	0.06485
													0.60525	0.127792		0.604417	0.06628
													0.606583	0.126839		0.60575	0.067711
													0.607917	0.125885		0.607083	0.070095
													0.60925	0.125408		0.608417	0.072479
													0.610583	0.124931		0.60975	0.074863
													0.611917	0.125885		0.611083	0.076294
													0.61325	0.127792		0.612417	0.077724
													0.614583	0.130653		0.61375	0.079155
													0.615917	0.133514		0.615083	0.080585
													0.61725	0.135422		0.616417	0.082493
													0.618583	0.135899		0.61775	0.0844
													0.619917	0.135422		0.619083	0.086308
													0.62125	0.135422		0.620417	0.089169
													0.622583	0.135422		0.62175	0.09203
													0.623917	0.135422		0.623083	0.094891
													0.62525	0.135899		0.624417	0.097752
													0.626583	0.135899		0.62575	0.100613
													0.627917	0.135899		0.627083	0.103474
													0.62925	0.135422		0.628417	0.105858
													0.630583	0.134468		0.62975	0.108719
													0.631917	0.133514		0.631083	0.111103
													0.63325	0.132084		0.632417	0.113487
													0.634583	0.130653		0.63375	0.119209
													0.635917	0.130653		0.635083	0.1297
													0.63725	0.13113		0.636417	0.145435
													0.638583	0.132084		0.63775	0.162125
													0.639917	0.133038		0.639083	0.17643
													0.64125	0.134945		0.640417	0.185013
													0.642583	0.136852		0.64175	0.186443
													0.643917	0.13876		0.643083	0.180244
													0.64525	0.14019		0.644417	0.167847
													0.646583	0.141144		0.64575	0.154018
													0.647917	0.141621		0.647083	0.142574
													0.64925	0.141144		0.648417	0.136852
													0.650583	0.140667		0.64975	0.136375
													0.651917	0.14019		0.651083	0.13876
													0.65325	0.139713		0.652417	0.141621
													0.654583	0.13876		0.65375	0.144005
													0.655917	0.138283		0.655083	0.146866
													0.65725	0.138283		0.656417	0.14925
													0.658583	0.139236		0.65775	0.151157
													0.659917	0.141144		0.659083	0.152111
													0.66125	0.143051		0.660417	0.153065
													0.662583	0.144482		0.66175	0.153542
													0.663917	0.146389		0.663083	0.154495
													0.66525	0.14782		0.664417	0.155449
													0.666583	0.14925		0.66575	0.156403
													0.667917	0.150204		0.667083	0.157356
													0.66925	0.151157		0.668417	0.15831
													0.670583	0.152111		0.66975	0.159264
													0.671917	0.153065		0.671083	0.160694
													0.67325	0.153065		0.672417	0.161171
													0.674583	0.152588		0.67375	0.161171
													0.675917	0.151634		0.675083	0.161648
													0.67725	0.151157		0.676417	0.162601
													0.678583	0.150204		0.67775	0.164032
													0.679917	0.149727		0.679083	0.165939
													0.68125	0.148773		0.680417	0.1688
													0.682583	0.14782		0.68175	0.171185
													0.683917	0.146389		0.683083	0.174522
													0.68525	0.144482		0.684417	0.17786
													0.686583	0.142574		0.68575	0.181198
													0.687917	0.141144		0.687083	0.183105
													0.68925	0.14019		0.688417	0.184059
													0.690583	0.140667		0.68975	0.185013
													0.691917	0.141144		0.691083	0.186443
													0.69325	0.142097		0.692417	0.187397
													0.694583	0.143051		0.69375	0.188828
													0.695917	0.144482		0.695083	0.191212
													0.69725	0.145435		0.696417	0.193119
													0.698583	0.145435		0.69775	0.195026
													0.699917	0.145435		0.699083	0.19598
													0.70125	0.145435		0.700417	0.196457
													0.702583	0.144958		0.70175	0.196457
													0.703917	0.144958		0.703083	0.196934
													0.70525	0.145435		0.704417	0.198364
													0.706583	0.145435		0.70575	0.200748
													0.707917	0.145435		0.707083	0.202656
													0.70925	0.145435		0.708417	0.204563
													0.710583	0.145912		0.70975	0.206947
													0.711917	0.145435		0.711083	0.208855
													0.71325	0.144958		0.712417	0.210285
													0.714583	0.144958		0.71375	0.211716
													0.715917	0.145435		0.715083	0.2141
													0.71725	0.146389		0.716417	0.216484
													0.718583	0.14782		0.71775	0.218868
													0.719917	0.149727		0.719083	0.221252
													0.72125	0.152588		0.720417	0.222683
													0.722583	0.154972		0.72175	0.223637
													0.723917	0.156403		0.723083	0.22459
													0.72525	0.157833		0.724417	0.226498
													0.726583	0.158787		0.72575	0.228405
													0.727917	0.15974		0.727083	0.230312
													0.72925	0.160694		0.728417	0.23222
													0.730583	0.162125		0.72975	0.234127
													0.731917	0.163555		0.731083	0.236034
													0.73325	0.164032		0.732417	0.237465
													0.734583	0.164986		0.73375	0.237942
													0.735917	0.165462		0.735083	0.239372
													0.73725	0.164986		0.736417	0.241756
													0.738583	0.165462		0.73775	0.244617
													0.739917	0.166416		0.739083	0.247478
													0.74125	0.16737		0.740417	0.248909
													0.742583	0.168324		0.74175	0.25034
													0.743917	0.169277		0.743083	0.252247
													0.74525	0.1688		0.744417	0.253201
													0.746583	0.168324		0.74575	0.253201
													0.747917	0.167847		0.747083	0.253201
													0.74925	0.16737		0.748417	0.253677
													0.750583	0.167847		0.74975	0.253677
													0.751917	0.167847		0.751083	0.253677
													0.75325	0.169277		0.752417	0.254154
													0.754583	0.171661		0.75375	0.255108
													0.755917	0.174522		0.755083	0.257015
													0.75725	0.177383		0.756417	0.258923
													0.758583	0.179768		0.75775	0.261784
													0.759917	0.181675		0.759083	0.264168
													0.76125	0.183105		0.760417	0.266552
													0.762583	0.183582		0.76175	0.267982
													0.763917	0.182629		0.763083	0.269413
													0.76525	0.180721		0.764417	0.27132
													0.766583	0.179291		0.76575	0.274181
													0.767917	0.179291		0.767083	0.276089
													0.76925	0.180244		0.768417	0.277519
													0.770583	0.182629		0.76975	0.27895
													0.771917	0.185966		0.771083	0.28038
													0.77325	0.188828		0.772417	0.281334
													0.774583	0.191212		0.77375	0.281334
													0.775917	0.191212		0.775083	0.281334
													0.77725	0.189781		0.776417	0.282764
													0.778583	0.18692		0.77775	0.284672
													0.779917	0.182152		0.779083	0.287533
													0.78125	0.178337		0.780417	0.290394
													0.782583	0.175953		0.78175	0.292778
													0.783917	0.174522		0.783083	0.296116
													0.78525	0.174522		0.784417	0.298023
													0.786583	0.174999		0.78575	0.298977
													0.787917	0.175953		0.787083	0.298977
													0.78925	0.17786		0.788417	0.298977
													0.790583	0.179291		0.78975	0.299454
													0.791917	0.179768		0.791083	0.300407
													0.79325	0.178814		0.792417	0.301361
													0.794583	0.17786		0.79375	0.302792
													0.795917	0.176907		0.795083	0.303268
													0.79725	0.17643		0.796417	0.303745
													0.798583	0.175476		0.79775	0.303745
													0.799917	0.174999		0.799083	0.303268
													0.80125	0.175476		0.800417	0.303745
													0.802583	0.176907		0.80175	0.305176
													0.803917	0.17786		0.803083	0.30756
													0.80525	0.178814		0.804417	0.310421
													0.806583	0.178814		0.80575	0.313759
													0.807917	0.179291		0.807083	0.31662
													0.80925	0.179768		0.808417	0.319004
													0.810583	0.178814		0.80975	0.320435
													0.811917	0.178337		0.811083	0.321865
													0.81325	0.177383		0.812417	0.323772
													0.814583	0.17643		0.81375	0.325203
													0.815917	0.175953		0.815083	0.326157
													0.81725	0.174999		0.816417	0.328541
													0.818583	0.174999		0.81775	0.331402
													0.819917	0.175476		0.819083	0.334263
													0.82125	0.17643		0.820417	0.337124
													0.822583	0.177383		0.82175	0.339985
													0.823917	0.17786		0.823083	0.343323
													0.82525	0.178814		0.824417	0.345707
													0.826583	0.178814		0.82575	0.346661
													0.827917	0.178337		0.827083	0.347137
													0.82925	0.176907		0.828417	0.348568
													0.830583	0.175953		0.82975	0.349522
													0.831917	0.175476		0.831083	0.350475
													0.83325	0.175476		0.832417	0.350952
													0.834583	0.175476		0.83375	0.351429
													0.835917	0.175953		0.835083	0.351429
													0.83725	0.17643		0.836417	0.351429
													0.838583	0.17643		0.83775	0.351906
													0.839917	0.175953		0.839083	0.353336
													0.84125	0.175476		0.840417	0.356197
													0.842583	0.175476		0.84175	0.359535
													0.843917	0.175953		0.843083	0.363827
													0.84525	0.17643		0.844417	0.367165
													0.846583	0.176907		0.84575	0.371456
													0.847917	0.17786		0.847083	0.380516
													0.84925	0.178814		0.848417	0.395298
													0.850583	0.179291		0.84975	0.411034
													0.851917	0.179291		0.851083	0.423908
													0.85325	0.178337		0.852417	0.431538
													0.854583	0.177383		0.85375	0.432491
													0.855917	0.177383		0.855083	0.425339
													0.85725	0.177383		0.856417	0.41151
													0.858583	0.17786		0.85775	0.396252
													0.859917	0.178814		0.859083	0.384808
													0.86125	0.180244		0.860417	0.379086
													0.862583	0.181675		0.86175	0.377655
													0.863917	0.182152		0.863083	0.379562
													0.86525	0.182629		0.864417	0.38147
													0.866583	0.183105		0.86575	0.383377
													0.867917	0.183105		0.867083	0.385284
													0.86925	0.182629		0.868417	0.386715
													0.870583	0.182152		0.86975	0.389099
													0.871917	0.181675		0.871083	0.391006
													0.87325	0.181675		0.872417	0.392437
													0.874583	0.181198		0.87375	0.392914
													0.875917	0.180244		0.875083	0.392914
													0.87725	0.179768		0.876417	0.392914
													0.878583	0.178814		0.87775	0.393391
													0.879917	0.177383		0.879083	0.393867
													0.88125	0.17643		0.880417	0.394821
													0.882583	0.175476		0.88175	0.396729
													0.883917	0.174999		0.883083	0.399113
													0.88525	0.174522		0.884417	0.401497
													0.886583	0.174046		0.88575	0.403404
													0.887917	0.174046		0.887083	0.404835
													0.88925	0.174522		0.888417	0.406265
													0.890583	0.174999		0.88975	0.408173
													0.891917	0.175476		0.891083	0.410557
													0.89325	0.176907		0.892417	0.413418
													0.894583	0.17786		0.89375	0.416279
													0.895917	0.179768		0.895083	0.419617
													0.89725	0.181675		0.896417	0.422001
													0.898583	0.183582		0.89775	0.423431
													0.899917	0.184536		0.899083	0.424385
													0.90125	0.18549		0.900417	0.424385
													0.902583	0.18549		0.90175	0.424862
													0.903917	0.185966		0.903083	0.424862
													0.90525	0.185966		0.904417	0.425339
													0.906583	0.18549		0.90575	0.425816
													0.907917	0.18549		0.907083	0.426769
													0.90925	0.186443		0.908417	0.427246
													0.910583	0.187874		0.90975	0.427723
													0.911917	0.188351		0.911083	0.428677
													0.91325	0.188351		0.912417	0.42963
													0.914583	0.188828		0.91375	0.432014
													0.915917	0.188828		0.915083	0.433922
													0.91725	0.189304		0.916417	0.436306
													0.918583	0.189781		0.91775	0.43726
													0.919917	0.190735		0.919083	0.437737
													0.92125	0.191689		0.920417	0.438213
													0.922583	0.192165		0.92175	0.438213
													0.923917	0.190735		0.923083	0.438213
													0.92525	0.188828		0.924417	0.43869
													0.926583	0.185966		0.92575	0.440121
													0.927917	0.184059		0.927083	0.442028
													0.92925	0.18692		0.928417	0.443935
													0.930583	0.200272		0.92975	0.445843
													0.931917	0.224113		0.931083	0.447273
													0.93325	0.249863		0.932417	0.449181
													0.934583	0.26989		0.93375	0.450611
													0.935917	0.28038		0.935083	0.452518
													0.93725	0.279903		0.936417	0.455379
													0.938583	0.266552		0.93775	0.457764
													0.939917	0.244141		0.939083	0.460148
													0.94125	0.219822		0.940417	0.462055
													0.942583	0.201225		0.94175	0.463963
													0.943917	0.191212		0.943083	0.465393
													0.94525	0.18692		0.944417	0.466347
													0.946583	0.185966		0.94575	0.4673
													0.947917	0.186443		0.947083	0.467777
													0.94925	0.193119		0.948417	0.468254
													0.950583	0.207901		0.94975	0.468731
													0.951917	0.228882		0.951083	0.468731
													0.95325	0.248909		0.952417	0.469208
													0.954583	0.261784		0.95375	0.469685
													0.955917	0.266075		0.955083	0.470638
													0.95725	0.260353		0.956417	0.471592
													0.958583	0.244617		0.95775	0.472546
													0.959917	0.223637		0.959083	0.47493
													0.96125	0.203609		0.960417	0.47636
													0.962583	0.190735		0.96175	0.477314
													0.963917	0.184536		0.963083	0.477314
													0.96525	0.183105		0.964417	0.477314
													0.966583	0.183582		0.96575	0.477791
													0.967917	0.185013		0.967083	0.478745
													0.96925	0.18549		0.968417	0.479221
													0.970583	0.185966		0.96975	0.480652
													0.971917	0.18692		0.971083	0.483513
													0.97325	0.187874		0.972417	0.485897
													0.974583	0.187397		0.97375	0.487804
													0.975917	0.18692		0.975083	0.489235
													0.97725	0.18692		0.976417	0.491142
													0.978583	0.187874		0.97775	0.492096
													0.979917	0.188828		0.979083	0.492573
													0.98125	0.189304		0.980417	0.49305
													0.982583	0.190258		0.98175	0.492573
													0.983917	0.191212		0.983083	0.492573
													0.98525	0.191212		0.984417	0.492573
													0.986583	0.191212		0.98575	0.49305
													0.987917	0.191212		0.987083	0.494003
													0.98925	0.191212		0.988417	0.49448
													0.990583	0.191212		0.98975	0.495434
													0.991917	0.191212		0.991083	0.496864
													0.99325	0.191689		0.992417	0.497341
													0.994583	0.192165		0.99375	0.497818
													0.995917	0.192642		0.995083	0.498295
													0.99725	0.193119		0.996417	0.499249
													0.998583	0.194073		0.99775	0.501633
													0.999917	0.193596		0.999083	0.50354
													1.00125	0.193596		1.00042	0.506401
													1.00258	0.193596		1.00175	0.508785
													1.00392	0.193119		1.00308	0.511169
													1.00525	0.192165		1.00442	0.513077
													1.00658	0.192165		1.00575	0.514984
													1.00792	0.193119		1.00708	0.516415
													1.00925	0.19455		1.00842	0.518322
													1.01058	0.195503		1.00975	0.520229
													1.01192	0.196457		1.01108	0.522614
													1.01325	0.198841		1.01242	0.524998
													1.01458	0.201225		1.01375	0.527859
													1.01592	0.203133		1.01508	0.530243
													1.01725	0.204563		1.01642	0.532627
													1.01858	0.20647		1.01775	0.534058
													1.01992	0.209332		1.01908	0.535965
													1.02125	0.211716		1.02042	0.537395
													1.02258	0.213146		1.02175	0.538349
													1.02392	0.215054		1.02308	0.540257
													1.02525	0.216961		1.02442	0.542164
													1.02658	0.218868		1.02575	0.544548
													1.02792	0.220299		1.02708	0.547409
													1.02925	0.222683		1.02842	0.55027
													1.03058	0.225544		1.02975	0.553131
													1.03192	0.228405		1.03108	0.555992
													1.03325	0.231266		1.03242	0.559807
													1.03458	0.234604		1.03375	0.565052
													1.03592	0.238895		1.03508	0.570774
													1.03725	0.243664		1.03642	0.576973
													1.03858	0.248432		1.03775	0.583649
													1.03992	0.253201		1.03908	0.590801
													1.04125	0.257969		1.04042	0.597954
													1.04258	0.263214		1.04175	0.603199
													1.04392	0.268459		1.04308	0.607967
													1.04525	0.272751		1.04442	0.611782
													1.04658	0.277042		1.04575	0.61655
													1.04792	0.282288		1.04708	0.621319
													1.04925	0.28801		1.04842	0.626564
													1.05058	0.293255		1.04975	0.632286
													1.05192	0.298977		1.05108	0.638485
													1.05325	0.304699		1.05242	0.64373
													1.05458	0.310421		1.05375	0.648975
													1.05592	0.316143		1.05508	0.653744
													1.05725	0.320911		1.05642	0.658989
													1.05858	0.326157		1.05775	0.665188
													1.05992	0.331402		1.05908	0.671864
													1.06125	0.336647		1.06042	0.67997
													1.06258	0.342369		1.06175	0.688553
													1.06392	0.348568		1.06308	0.697613
													1.06525	0.355244		1.06442	0.706196
													1.06658	0.362396		1.06575	0.714779
													1.06792	0.370026		1.06708	0.723839
													1.06925	0.378132		1.06842	0.731945
													1.07058	0.386715		1.06975	0.739574
													1.07192	0.394821		1.07108	0.746727
													1.07325	0.401974		1.07242	0.75388
													1.07458	0.409126		1.07375	0.761032
													1.07592	0.415325		1.07508	0.768661
													1.07725	0.421047		1.07642	0.776291
													1.07858	0.427723		1.07775	0.784397
													1.07992	0.435352		1.07908	0.794411
													1.08125	0.443935		1.08042	0.803947
													1.08258	0.453949		1.08175	0.813484
													1.08392	0.464439		1.08308	0.823498
													1.08525	0.474453		1.08442	0.833988
													1.08658	0.484943		1.08575	0.844955
													1.08792	0.49448		1.08708	0.855923
													1.08925	0.50354		1.08842	0.866413
													1.09058	0.511646		1.08975	0.876904
													1.09192	0.520229		1.09108	0.887871
													1.09325	0.528336		1.09242	0.898838
													1.09458	0.536919		1.09375	0.909805
													1.09592	0.545502		1.09508	0.919819
													1.09725	0.554085		1.09642	0.929356
													1.09858	0.563622		1.09775	0.939369
													1.09992	0.574112		1.09908	0.950336
													1.10125	0.584126		1.10042	0.960827
													1.10258	0.595093		1.10175	0.971317
													1.10392	0.607491		1.10308	0.982761
													1.10525	0.621319		1.10442	0.994682
													1.10658	0.635624		1.10575	1.00708
													1.10792	0.650406		1.10708	1.01948
													1.10925	0.666142		1.10842	1.03188
													1.11058	0.6814		1.10975	1.04523
													1.11192	0.696659		1.11108	1.05906
													1.11325	0.711918		1.11242	1.07288
													1.11458	0.72813		1.11375	1.08767
													1.11592	0.744343		1.11508	1.10245
													1.11725	0.761032		1.11642	1.11771
													1.11858	0.778198		1.11775	1.13392
													1.11992	0.795841		1.11908	1.15156
													1.12125	0.813007		1.12042	1.16921
													1.12258	0.83065		1.12175	1.18732
													1.12392	0.84877		1.12308	1.20544
													1.12525	0.86832		1.12442	1.22309
													1.12658	0.887871		1.12575	1.24073
													1.12792	0.908375		1.12708	1.25742
													1.12925	0.928879		1.12842	1.27506
													1.13058	0.94986		1.12975	1.29318
													1.13192	0.970364		1.13108	1.31178
													1.13325	0.991344		1.13242	1.33133
													1.13458	1.01232		1.13375	1.34993
													1.13592	1.03235		1.13508	1.36757
													1.13725	1.05238		1.13642	1.38426
													1.13858	1.07241		1.13775	1.40047
													1.13992	1.09148		1.13908	1.41668
													1.14125	1.1096		1.14042	1.43242
													1.14258	1.12772		1.14175	1.44815
													1.14392	1.14536		1.14308	1.46437
													1.14525	1.16301		1.14442	1.48058
													1.14658	1.18017		1.14575	1.49679
													1.14792	1.19686		1.14708	1.51205
													1.14925	1.2126		1.14842	1.5254
													1.15058	1.22786		1.14975	1.53828
													1.15192	1.24168		1.15108	1.55115
													1.15325	1.25456		1.15242	1.56259
													1.15458	1.26743		1.15375	1.57309
													1.15592	1.27935		1.15508	1.5831
													1.15725	1.29032		1.15642	1.59264
													1.15858	1.30034		1.15775	1.60313
													1.15992	1.3094		1.15908	1.61266
													1.16125	1.3175		1.16042	1.62172
													1.16258	1.32418		1.16175	1.63078
													1.16392	1.3299		1.16308	1.64032
													1.16525	1.33514		1.16442	1.6489
													1.16658	1.33944		1.16575	1.65558
													1.16792	1.34373		1.16708	1.66035
													1.16925	1.34754		1.16842	1.66464
													1.17058	1.35183		1.16975	1.6675
													1.17192	1.35517		1.17108	1.66988
													1.17325	1.35851		1.17242	1.67179
													1.17458	1.36137		1.17375	1.67513
													1.17592	1.36423		1.17508	1.67942
													1.17725	1.36661		1.17642	1.68228
													1.17858	1.369		1.17775	1.68419
													1.17992	1.37138		1.17908	1.68514
													1.18125	1.37424		1.18042	1.68514
													1.18258	1.37663		1.18175	1.68371
													1.18392	1.37901		1.18308	1.68085
													1.18525	1.38092		1.18442	1.67847
													1.18658	1.38283		1.18575	1.67751
													1.18792	1.38426		1.18708	1.67799
													1.18925	1.38521		1.18842	1.67847
													1.19058	1.3876		1.18975	1.6799
													1.19192	1.39046		1.19108	1.68133
													1.19325	1.39379		1.19242	1.68276
													1.19458	1.39713		1.19375	1.68324
													1.19592	1.39999		1.19508	1.68228
													1.19725	1.40238		1.19642	1.68037
													1.19858	1.40381		1.19775	1.67894
													1.19992	1.40524		1.19908	1.67704
													1.20125	1.40667		1.20042	1.67465
													1.20258	1.40953		1.20175	1.67227
													1.20392	1.41192		1.20308	1.66988
													1.20525	1.41335		1.20442	1.6675
													1.20658	1.41525		1.20575	1.66559
													1.20792	1.41668		1.20708	1.66321
													1.20925	1.41716		1.20842	1.6613
													1.21058	1.41764		1.20975	1.65939
													1.21192	1.41811		1.21108	1.65796
													1.21325	1.41954		1.21242	1.65606
													1.21458	1.42145		1.21375	1.65367
													1.21592	1.42336		1.21508	1.65129
													1.21725	1.42527		1.21642	1.64795
													1.21858	1.4267		1.21775	1.64413
													1.21992	1.42765		1.21908	1.63937
													1.22125	1.42813		1.22042	1.63603
													1.22258	1.42813		1.22175	1.63794
													1.22392	1.4286		1.22308	1.64652
													1.22525	1.42956		1.22442	1.65987
													1.22658	1.43099		1.22575	1.67322
													1.22792	1.43242		1.22708	1.68228
													1.22925	1.43337		1.22842	1.68467
													1.23058	1.43385		1.22975	1.67847
													1.23192	1.43385		1.23108	1.66511
													1.23325	1.43194		1.23242	1.65176
													1.23458	1.43003		1.23375	1.647
													1.23592	1.42765		1.23508	1.65272
													1.23725	1.42574		1.23642	1.66321
													1.23858	1.42527		1.23775	1.67322
													1.23992	1.42479		1.23908	1.67799
													1.24125	1.42479		1.24042	1.6737
													1.24258	1.42479		1.24175	1.65987
													1.24392	1.42574		1.24308	1.64127
													1.24525	1.42622		1.24442	1.62268
													1.24658	1.4267		1.24575	1.60885
													1.24792	1.42717		1.24708	1.60074
													1.24925	1.42813		1.24842	1.59693
													1.25058	1.42956		1.24975	1.59407
													1.25192	1.43146		1.25108	1.59121
													1.25325	1.43337		1.25242	1.58882
													1.25458	1.43576		1.25375	1.58691
													1.25592	1.43814		1.25508	1.58596
													1.25725	1.43957		1.25642	1.58548
													1.25858	1.44053		1.25775	1.58644
													1.25992	1.441		1.25908	1.58644
													1.26125	1.441		1.26042	1.58644
													1.26258	1.44196		1.26175	1.58596
													1.26392	1.44291		1.26308	1.58501
													1.26525	1.44482		1.26442	1.58405
													1.26658	1.44768		1.26575	1.58358
													1.26792	1.45101		1.26708	1.58453
													1.26925	1.45483		1.26842	1.58596
													1.27058	1.45912		1.26975	1.58644
													1.27192	1.46389		1.27108	1.58691
													1.27325	1.46914		1.27242	1.58691
													1.27458	1.47438		1.27375	1.58691
													1.27592	1.47915		1.27508	1.58739
													1.27725	1.48392		1.27642	1.58834
													1.27858	1.48773		1.27775	1.58977
													1.27992	1.49107		1.27908	1.59216
													1.28125	1.49393		1.28042	1.59502
													1.28258	1.49727		1.28175	1.5974
													1.28392	1.50156		1.28308	1.59931
													1.28525	1.50633		1.28442	1.60074
													1.28658	1.51205		1.28575	1.60217
													1.28792	1.51873		1.28708	1.60408
													1.28925	1.5254		1.28842	1.60599
													1.29058	1.5316		1.28975	1.60742
													1.29192	1.53828		1.29108	1.6098
													1.29325	1.54543		1.29242	1.61219
													1.29458	1.55306		1.29375	1.61409
													1.29592	1.56021		1.29508	1.61695
													1.29725	1.56784		1.29642	1.62029
													1.29858	1.57642		1.29775	1.62458
													1.29992	1.58596		1.29908	1.62935
													1.30125	1.59502		1.30042	1.63412
													1.30258	1.60313		1.30175	1.63889
													1.30392	1.61123		1.30308	1.64366
													1.30525	1.61934		1.30442	1.64795
													1.30658	1.62792		1.30575	1.65176
													1.30792	1.63698		1.30708	1.65463
													1.30925	1.64652		1.30842	1.65796
													1.31058	1.65749		1.30975	1.66178
													1.31192	1.66845		1.31108	1.66655
													1.31325	1.67894		1.31242	1.67179
													1.31458	1.68896		1.31375	1.67751
													1.31592	1.69897		1.31508	1.68324
													1.31725	1.71042		1.31642	1.68896
													1.31858	1.72472		1.31775	1.69373
													1.31992	1.74427		1.31908	1.69802
													1.32125	1.76668		1.32042	1.70231
													1.32258	1.78957		1.32175	1.70755
													1.32392	1.81103		1.32308	1.71375
													1.32525	1.82962		1.32442	1.72138
													1.32658	1.84059		1.32575	1.72996
													1.32792	1.84536		1.32708	1.73807
													1.32925	1.84727		1.32842	1.7457
													1.33058	1.8487		1.32975	1.75238
													1.33192	1.85204		1.33108	1.75857
													1.33325	1.85823		1.33242	1.76621
													1.33458	1.8692		1.33375	1.77908
													1.33592	1.88303		1.33508	1.79815
													1.33725	1.89829		1.33642	1.82295
													1.33858	1.91355		1.33775	1.84727
													1.33992	1.92928		1.33908	1.86729
													1.34125	1.94502		1.34042	1.88017
													1.34258	1.96075		1.34175	1.88446
													1.34392	1.97697		1.34308	1.8816
													1.34525	1.9927		1.34442	1.87349
													1.34658	2.00892		1.34575	1.86634
													1.34792	2.02656		1.34708	1.86491
													1.34925	2.04515		1.34842	1.86968
													1.35058	2.06375		1.34975	1.87874
													1.35192	2.08378		1.35108	1.88923
													1.35325	2.10476		1.35242	1.90067
													1.35458	2.12574		1.35375	1.91212
													1.35592	2.1472		1.35508	1.92404
													1.35725	2.16866		1.35642	1.93548
													1.35858	2.19059		1.35775	1.94693
													1.35992	2.21252		1.35908	1.95837
													1.36125	2.23494		1.36042	1.97077
													1.36258	2.2583		1.36175	1.98364
													1.36392	2.28262		1.36308	1.99699
													1.36525	2.30694		1.36442	2.00939
													1.36658	2.33173		1.36575	2.02227
													1.36792	2.35653		1.36708	2.03609
													1.36925	2.38323		1.36842	2.05088
													1.37058	2.41423		1.36975	2.06614
													1.37192	2.44856		1.37108	2.08235
													1.37325	2.4848		1.37242	2.09951
													1.37458	2.52104		1.37375	2.11668
													1.37592	2.55728		1.37508	2.13385
													1.37725	2.59018		1.37642	2.15006
													1.37858	2.6164		1.37775	2.16627
													1.37992	2.63786		1.37908	2.18248
													1.38125	2.65884		1.38042	2.19917
													1.38258	2.68221		1.38175	2.21729
													1.38392	2.70796		1.38308	2.23637
													1.38525	2.73752		1.38442	2.25687
													1.38658	2.77042		1.38575	2.27737
													1.38792	2.80523		1.38708	2.2974
													1.38925	2.841		1.38842	2.31838
													1.39058	2.87676		1.38975	2.33984
													1.39192	2.91204		1.39108	2.36177
													1.39325	2.94781		1.39242	2.38419
													1.39458	2.98405		1.39375	2.40803
													1.39592	3.02172		1.39508	2.43378
													1.39725	3.06034		1.39642	2.46048
													1.39858	3.10087		1.39775	2.48766
													1.39992	3.14331		1.39908	2.51532
													1.40125	3.18813		1.40042	2.54345
													1.40258	3.23439		1.40175	2.57254
													1.40392	3.28302		1.40308	2.60305
													1.40525	3.33262		1.40442	2.63405
													1.40658	3.38364		1.40575	2.66695
													1.40792	3.43561		1.40708	2.70081
													1.40925	3.48902		1.40842	2.73514
													1.41058	3.54481		1.40975	2.77042
													1.41192	3.60107		1.41108	2.80666
													1.41325	3.65972		1.41242	2.84386
													1.41458	3.71885		1.41375	2.882
													1.41592	3.77989		1.41508	2.92158
													1.41725	3.8414		1.41642	2.96354
													1.41858	3.90387		1.41775	3.00693
													1.41992	3.96776		1.41908	3.05176
													1.42125	4.03357		1.42042	3.09801
													1.42258	4.10128		1.42175	3.14426
													1.42392	4.17185		1.42308	3.19147
													1.42525	4.24433		1.42442	3.23915
													1.42658	4.32015		1.42575	3.28827
													1.42792	4.39978		1.42708	3.33929
													1.42925	4.48179		1.42842	3.39222
													1.43058	4.56476		1.42975	3.44753
													1.43192	4.64916		1.43108	3.50571
													1.43325	4.73595		1.43242	3.56674
													1.43458	4.82559		1.43375	3.62921
													1.43592	4.91762		1.43508	3.69453
													1.43725	5.01251		1.43642	3.76177
													1.43858	5.11026		1.43775	3.83139
													1.43992	5.2104		1.43908	3.90244
													1.44125	5.31244		1.44042	3.97539
													1.44258	5.41639		1.44175	4.0493
													1.44392	5.52225		1.44308	4.12512
													1.44525	5.63097		1.44442	4.20189
													1.44658	5.7435		1.44575	4.28104
													1.44792	5.86033		1.44708	4.36211
													1.44925	5.98097		1.44842	4.44651
													1.45058	6.10495		1.44975	4.53425
													1.45192	6.23369		1.45108	4.62532
													1.45325	6.37245		1.45242	4.71973
													1.45458	6.52552		1.45375	4.81749
													1.45592	6.68907		1.45508	4.9181
													1.45725	6.85406		1.45642	5.02205
													1.45858	7.01427		1.45775	5.12886
													1.45992	7.16782		1.45908	5.23853
													1.46125	7.31373		1.46042	5.35059
													1.46258	7.45106		1.46175	5.46503
													1.46392	7.58553		1.46308	5.58233
													1.46525	7.72524		1.46442	5.70202
													1.46658	7.87783		1.46575	5.82504
													1.46792	8.04329		1.46708	5.95045
													1.46925	8.21829		1.46842	6.0792
													1.47058	8.39806		1.46975	6.21223
													1.47192	8.58164		1.47108	6.34956
													1.47325	8.76951		1.47242	6.49166
													1.47458	8.96215		1.47375	6.6371
													1.47592	9.16052		1.47508	6.78682
													1.47725	9.36317		1.47642	6.93989
													1.47858	9.57108		1.47775	7.09677
													1.47992	9.7847		1.47908	7.25794
													1.48125	10.0036		1.48042	7.42292
													1.48258	10.2267		1.48175	7.59172
													1.48392	10.4527		1.48308	7.76482
													1.48525	10.6826		1.48442	7.9422
													1.48658	10.9162		1.48575	8.12387
													1.48792	11.1542		1.48708	8.30889
													1.48925	11.3959		1.48842	8.49771
													1.49058	11.642		1.48975	8.69083
													1.49192	11.8938		1.49108	8.88777
													1.49325	12.1527		1.49242	9.08804
													1.49458	12.4183		1.49375	9.2926
													1.49592	12.691		1.49508	9.50241
													1.49725	12.9695		1.49642	9.71794
													1.49858	13.2537		1.49775	9.93919
													1.49992	13.5436		1.49908	10.1662
													1.50125	13.8369		1.50042	10.3984
													1.50258	14.1349		1.50175	10.6354
													1.50392	14.4362		1.50308	10.8771
													1.50525	14.7429		1.50442	11.1222
													1.50658	15.0533		1.50575	11.3716
													1.50792	15.3685		1.50708	11.6253
													1.50925	15.6879		1.50842	11.8828
													1.51058	16.0127		1.50975	12.1431
													1.51192	16.3422		1.51108	12.4063
													1.51325	16.6769		1.51242	12.6724
													1.51458	17.0174		1.51375	12.9423
													1.51592	17.3631		1.51508	13.2155
													1.51725	17.715		1.51642	13.4935
													1.51858	18.0717		1.51775	13.7777
													1.51992	18.4326		1.51908	14.0681
													1.52125	18.7983		1.52042	14.3652
													1.52258	19.1698		1.52175	14.6685
													1.52392	19.546		1.52308	14.977
													1.52525	19.927		1.52442	15.2907
													1.52658	20.3147		1.52575	15.6112
													1.52792	20.7081		1.52708	15.9373
													1.52925	21.1053		1.52842	16.2682
													1.53058	21.5035		1.52975	16.6011
													1.53192	21.9026		1.53108	16.9353
													1.53325	22.3036		1.53242	17.2706
													1.53458	22.7055		1.53375	17.6048
													1.53592	23.1094		1.53508	17.9377
													1.53725	23.5162		1.53642	18.2719
													1.53858	23.9291		1.53775	18.6109
													1.53992	24.3483		1.53908	18.9552
													1.54125	24.7726		1.54042	19.3062
													1.54258	25.2023		1.54175	19.6638
													1.54392	25.6362		1.54308	20.0276
													1.54525	26.0739		1.54442	20.3953
													1.54658	26.5145		1.54575	20.7663
													1.54792	26.957		1.54708	21.1396
													1.54925	27.4029		1.54842	21.5159
													1.55058	27.8506		1.54975	21.8944
													1.55192	28.3003		1.55108	22.2754
													1.55325	28.7514		1.55242	22.6598
													1.55458	29.2029		1.55375	23.0498
													1.55592	29.6545		1.55508	23.4466
													1.55725	30.1056		1.55642	23.8476
													1.55858	30.5581		1.55775	24.2481
													1.55992	31.0116		1.55908	24.6444
													1.56125	31.4689		1.56042	25.0359
													1.56258	31.9305		1.56175	25.4235
													1.56392	32.3949		1.56308	25.8079
													1.56525	32.8617		1.56442	26.1922
													1.56658	33.329		1.56575	26.5813
													1.56792	33.7963		1.56708	26.9771
													1.56925	34.2631		1.56842	27.38
													1.57058	34.7295		1.56975	27.7867
													1.57192	35.1953		1.57108	28.1949
													1.57325	35.6612		1.57242	28.6035
													1.57458	36.1261		1.57375	29.0122
													1.57592	36.5891		1.57508	29.4209
													1.57725	37.0493		1.57642	29.829
													1.57858	37.5071		1.57775	30.2353
													1.57992	37.9634		1.57908	30.6368
													1.58125	38.4183		1.58042	31.0349
													1.58258	38.8732		1.58175	31.4298
													1.58392	39.3281		1.58308	31.8222
													1.58525	39.7844		1.58442	32.2151
													1.58658	40.2398		1.58575	32.6095
													1.58792	40.6942		1.58708	33.0076
													1.58925	41.1468		1.58842	33.4077
													1.59058	41.5964		1.58975	33.8073
													1.59192	42.0432		1.59108	34.2054
													1.59325	42.4862		1.59242	34.6022
													1.59458	42.9258		1.59375	34.9975
													1.59592	43.3621		1.59508	35.3947
													1.59725	43.7932		1.59642	35.7957
													1.59858	44.219		1.59775	36.1981
													1.59992	44.6386		1.59908	36.5968
													1.60125	45.0535		1.60042	36.9864
													1.60258	45.4631		1.60175	37.3631
													1.60392	45.8684		1.60308	37.724
													1.60525	46.2699		1.60442	38.0707
													1.60658	46.6681		1.60575	38.4097
													1.60792	47.0633		1.60708	38.7507
													1.60925	47.4553		1.60842	39.1011
													1.61058	47.8425		1.60975	39.4626
													1.61192	48.2244		1.61108	39.8297
													1.61325	48.6021		1.61242	40.195
													1.61458	48.9755		1.61375	40.5521
													1.61592	49.3445		1.61508	40.8978
													1.61725	49.7098		1.61642	41.2321
													1.61858	50.0698		1.61775	41.5549
													1.61992	50.4217		1.61908	41.8706
													1.62125	50.7655		1.62042	42.1815
													1.62258	51.1003		1.62175	42.4895
													1.62392	51.4269		1.62308	42.7933
													1.62525	51.7449		1.62442	43.0899
													1.62658	52.0568		1.62575	43.376
													1.62792	52.3629		1.62708	43.6549
													1.62925	52.6648		1.62842	43.9282
													1.63058	52.9618		1.62975	44.1985
													1.63192	53.2522		1.63108	44.466
													1.63325	53.5355		1.63242	44.7302
													1.63458	53.8111		1.63375	44.9915
													1.63592	54.0795		1.63508	45.2495
													1.63725	54.3418		1.63642	45.5022
													1.63858	54.5974		1.63775	45.7487
													1.63992	54.8477		1.63908	45.9895
													1.64125	55.0909		1.64042	46.2246
													1.64258	55.3265		1.64175	46.4535
													1.64392	55.553		1.64308	46.6766
													1.64525	55.7699		1.64442	46.8931
													1.64658	55.9769		1.64575	47.1015
													1.64792	56.1757		1.64708	47.3008
													1.64925	56.3679		1.64842	47.4901
													1.65058	56.5543		1.64975	47.6699
													1.65192	56.735		1.65108	47.842
													1.65325	56.91		1.65242	48.0084
													1.65458	57.0779		1.65375	48.1706
													1.65592	57.2381		1.65508	48.3284
													1.65725	57.3907		1.65642	48.4829
													1.65858	57.5356		1.65775	48.6326
													1.65992	57.6754		1.65908	48.7771
													1.66125	57.8089		1.66042	48.9144
													1.66258	57.9367		1.66175	49.0441
													1.66392	58.0578		1.66308	49.1672
													1.66525	58.1703		1.66442	49.2835
													1.66658	58.2728		1.66575	49.3941
													1.66792	58.3644		1.66708	49.4981
													1.66925	58.4464		1.66842	49.5944
													1.67058	58.5213		1.66975	49.6812
													1.67192	58.5899		1.67108	49.758
													1.67325	58.6524		1.67242	49.8266
													1.67458	58.7091		1.67375	49.8872
													1.67592	58.7597		1.67508	49.9415
													1.67725	58.8026		1.67642	49.9916
													1.67858	58.8355		1.67775	50.0388
													1.67992	58.8584		1.67908	50.0817
													1.68125	58.8727		1.68042	50.1199
													1.68258	58.8808		1.68175	50.1509
													1.68392	58.8827		1.68308	50.1747
													1.68525	58.8784		1.68442	50.1914
													1.68658	58.8674		1.68575	50.2014
													1.68792	58.8493		1.68708	50.2057
													1.68925	58.8231		1.68842	50.2047
													1.69058	58.7897		1.68975	50.1971
													1.69192	58.7506		1.69108	50.1819
													1.69325	58.7091		1.69242	50.158
													1.69458	58.6638		1.69375	50.1251
													1.69592	58.6152		1.69508	50.0841
													1.69725	58.5623		1.69642	50.0374
													1.69858	58.5036		1.69775	49.9873
													1.69992	58.4354		1.69908	49.9334
													1.70125	58.3572		1.70042	49.8762
													1.70258	58.2704		1.70175	49.8142
													1.70392	58.1765		1.70308	49.7475
													1.70525	58.0769		1.70442	49.6759
													1.70658	57.9724		1.70575	49.5996
													1.70792	57.8618		1.70708	49.5186
													1.70925	57.745		1.70842	49.4318
													1.71058	57.62		1.70975	49.3398
													1.71192	57.4875		1.71108	49.2415
													1.71325	57.3497		1.71242	49.1386
													1.71458	57.2085		1.71375	49.0294
													1.71592	57.0669		1.71508	48.913
													1.71725	56.9243		1.71642	48.7919
													1.71858	56.7799		1.71775	48.6674
													1.71992	56.6311		1.71908	48.542
													1.72125	56.4747		1.72042	48.4185
													1.72258	56.3088		1.72175	48.2993
													1.72392	56.1328		1.72308	48.1825
													1.72525	55.9487		1.72442	48.0618
													1.72658	55.7599		1.72575	47.9283
													1.72792	55.5687		1.72708	47.7791
													1.72925	55.376		1.72842	47.6122
													1.73058	55.1829		1.72975	47.4296
													1.73192	54.9893		1.73108	47.2364
													1.73325	54.7919		1.73242	47.0419
													1.73458	54.5898		1.73375	46.8531
													1.73592	54.3819		1.73508	46.6695
													1.73725	54.1692		1.73642	46.4878
													1.73858	53.9527		1.73775	46.3042
													1.73992	53.7324		1.73908	46.1159
													1.74125	53.5083		1.74042	45.9237
													1.74258	53.2803		1.74175	45.7287
													1.74392	53.0477		1.74308	45.5318
													1.74525	52.8078		1.74442	45.3324
													1.74658	52.5613		1.74575	45.1307
													1.74792	52.3081		1.74708	44.9262
													1.74925	52.052		1.74842	44.7178
													1.75058	51.7945		1.74975	44.5046
													1.75192	51.5366		1.75108	44.2872
													1.75325	51.2786		1.75242	44.0664
													1.75458	51.0197		1.75375	43.8433
													1.75592	50.7579		1.75508	43.6182
													1.75725	50.4923		1.75642	43.3912
													1.75858	50.221		1.75775	43.1628
													1.75992	49.9463		1.75908	42.9316
													1.76125	49.6697		1.76042	42.697
													1.76258	49.3937		1.76175	42.4595
													1.76392	49.1176		1.76308	42.2192
													1.76525	48.841		1.76442	41.9769
													1.76658	48.563		1.76575	41.7337
													1.76792	48.2812		1.76708	41.4905
													1.76925	47.9946		1.76842	41.2455
													1.77058	47.7023		1.76975	40.998
													1.77192	47.4062		1.77108	40.7481
													1.77325	47.1072		1.77242	40.4944
													1.77458	46.8078		1.77375	40.2374
													1.77592	46.5074		1.77508	39.978
													1.77725	46.206		1.77642	39.7177
													1.77858	45.9027		1.77775	39.4568
													1.77992	45.5971		1.77908	39.196
													1.78125	45.289		1.78042	38.9357
													1.78258	44.98		1.78175	38.6791
													1.78392	44.6715		1.78308	38.4269
													1.78525	44.3644		1.78442	38.1756
													1.78658	44.0583		1.78575	37.9229
													1.78792	43.7522		1.78708	37.6654
													1.78925	43.4446		1.78842	37.4007
													1.79058	43.1333		1.78975	37.127
													1.79192	42.8171		1.79108	36.8447
													1.79325	42.4972		1.79242	36.5572
													1.79458	42.1748		1.79375	36.2682
													1.79592	41.851		1.79508	35.9812
													1.79725	41.5254		1.79642	35.697
													1.79858	41.1992		1.79775	35.4137
													1.79992	40.8721		1.79908	35.1305
													1.80125	40.5445		1.80042	34.8473
													1.80258	40.2174		1.80175	34.5654
													1.80392	39.8936		1.80308	34.2851
													1.80525	39.5742		1.80442	34.0061
													1.80658	39.2599		1.80575	33.7286
													1.80792	38.95		1.80708	33.4516
													1.80925	38.6419		1.80842	33.176
													1.81058	38.3329		1.80975	32.9008
													1.81192	38.0216		1.81108	32.6257
													1.81325	37.7054		1.81242	32.3505
													1.81458	37.3845		1.81375	32.0749
													1.81592	37.0593		1.81508	31.7993
													1.81725	36.7317		1.81642	31.5237
													1.81858	36.4037		1.81775	31.2467
													1.81992	36.077		1.81908	30.9677
													1.82125	35.7518		1.82042	30.6873
													1.82258	35.4295		1.82175	30.4074
													1.82392	35.109		1.82308	30.1275
													1.82525	34.7896		1.82442	29.849
													1.82658	34.4706		1.82575	29.5711
													1.82792	34.152		1.82708	29.2935
													1.82925	33.8364		1.82842	29.017
													1.83058	33.5245		1.82975	28.7418
													1.83192	33.2169		1.83108	28.4686
													1.83325	32.9113		1.83242	28.1968
													1.83458	32.6066		1.83375	27.9255
													1.83592	32.3005		1.83508	27.6556
													1.83725	31.991		1.83642	27.3857
													1.83858	31.6777		1.83775	27.1158
													1.83992	31.3621		1.83908	26.844
													1.84125	31.0464		1.84042	26.5708
													1.84258	30.7336		1.84175	26.298
													1.84392	30.4246		1.84308	26.0253
													1.84525	30.118		1.84442	25.754
													1.84658	29.8142		1.84575	25.4836
													1.84792	29.511		1.84708	25.2156
													1.84925	29.2077		1.84842	24.95
													1.85058	28.9049		1.84975	24.6863
													1.85192	28.6026		1.85108	24.4231
													1.85325	28.3031		1.85242	24.1613
													1.85458	28.0061		1.85375	23.9005
													1.85592	27.7124		1.85508	23.6406
													1.85725	27.4219		1.85642	23.3822
													1.85858	27.1325		1.85775	23.1257
													1.85992	26.8426		1.85908	22.871
													1.86125	26.5531		1.86042	22.6178
													1.86258	26.2632		1.86175	22.3651
													1.86392	25.9748		1.86308	22.1133
													1.86525	25.6872		1.86442	21.8611
													1.86658	25.4021		1.86575	21.6093
													1.86792	25.1203		1.86708	21.3585
													1.86925	24.8399		1.86842	21.1096
													1.87058	24.5609		1.86975	20.8621
													1.87192	24.2829		1.87108	20.6165
													1.87325	24.0059		1.87242	20.3733
													1.87458	23.7317		1.87375	20.1316
													1.87592	23.4613		1.87508	19.8917
													1.87725	23.1943		1.87642	19.6533
													1.87858	22.9311		1.87775	19.4182
													1.87992	22.6703		1.87908	19.1874
													1.88125	22.4109		1.88042	18.9591
													1.88258	22.1515		1.88175	18.7325
													1.88392	21.8921		1.88308	18.507
													1.88525	21.6322		1.88442	18.2824
													1.88658	21.3728		1.88575	18.0564
													1.88792	21.1148		1.88708	17.8285
													1.88925	20.8588		1.88842	17.5996
													1.89058	20.6056		1.88975	17.3716
													1.89192	20.3543		1.89108	17.1471
													1.89325	20.1063		1.89242	16.9272
													1.89458	19.8626		1.89375	16.7108
													1.89592	19.6233		1.89508	16.4981
													1.89725	19.3877		1.89642	16.2883
													1.89858	19.156		1.89775	16.0809
													1.89992	18.9266		1.89908	15.8758
													1.90125	18.6982		1.90042	15.6727
													1.90258	18.4703		1.90175	15.4724
													1.90392	18.2424		1.90308	15.2745
													1.90525	18.0149		1.90442	15.0795
													1.90658	17.7875		1.90575	14.8854
													1.90792	17.5619		1.90708	14.6913
													1.90925	17.3392		1.90842	14.4982
													1.91058	17.1199		1.90975	14.3061
													1.91192	16.9039		1.91108	14.1139
													1.91325	16.6912		1.91242	13.9237
													1.91458	16.4828		1.91375	13.7358
													1.91592	16.2773		1.91508	13.5503
													1.91725	16.0727		1.91642	13.3672
													1.91858	15.8701		1.91775	13.1865
													1.91992	15.6698		1.91908	13.0072
													1.92125	15.4734		1.92042	12.8303
													1.92258	15.2803		1.92175	12.6553
													1.92392	15.09		1.92308	12.4826
													1.92525	14.9016		1.92442	12.3119
													1.92658	14.7157		1.92575	12.1431
													1.92792	14.5302		1.92708	11.9767
													1.92925	14.3456		1.92842	11.8127
													1.93058	14.1621		1.92975	11.6506
													1.93192	13.9809		1.93108	11.4899
													1.93325	13.8016		1.93242	11.3297
													1.93458	13.6251		1.93375	11.1713
													1.93592	13.4511		1.93508	11.0154
													1.93725	13.278		1.93642	10.8614
													1.93858	13.1054		1.93775	10.7098
													1.93992	12.9347		1.93908	10.5605
													1.94125	12.7664		1.94042	10.4141
													1.94258	12.6004		1.94175	10.2692
													1.94392	12.4388		1.94308	10.1256
													1.94525	12.28		1.94442	9.98402
													1.94658	12.1245		1.94575	9.84526
													1.94792	11.9719		1.94708	9.70888
													1.94925	11.8213		1.94842	9.57489
													1.95058	11.6715		1.94975	9.44376
													1.95192	11.5228		1.95108	9.31406
													1.95325	11.3745		1.95242	9.18484
													1.95458	11.2276		1.95375	9.05609
													1.95592	11.0817		1.95508	8.92687
													1.95725	10.9372		1.95642	8.79955
													1.95858	10.7956		1.95775	8.67367
													1.95992	10.6564		1.95908	8.54969
													1.96125	10.5195		1.96042	8.42762
													1.96258	10.385		1.96175	8.30793
													1.96392	10.253		1.96308	8.18968
													1.96525	10.1242		1.96442	8.07333
													1.96658	9.99832		1.96575	7.95841
													1.96792	9.87577		1.96708	7.84588
													1.96925	9.75513		1.96842	7.73525
													1.97058	9.6364		1.96975	7.62701
													1.97192	9.51958		1.97108	7.52163
													1.97325	9.40418		1.97242	7.41816
													1.97458	9.28974		1.97375	7.31659
													1.97592	9.17435		1.97508	7.21598
													1.97725	9.05991		1.97642	7.11632
													1.97858	8.94642		1.97775	7.01666
													1.97992	8.83627		1.97908	6.91795
													1.98125	8.72898		1.98042	6.8202
													1.98258	8.62455		1.98175	6.72388
													1.98392	8.52299		1.98308	6.62899
													1.98525	8.4238		1.98442	6.53648
													1.98658	8.32558		1.98575	6.44636
													1.98792	8.22782		1.98708	6.35862
													1.98925	8.1296		1.98842	6.27232
													1.99058	8.0328		1.98975	6.18792
													1.99192	7.93791		1.99108	6.10447
													1.99325	7.84588		1.99242	6.0215
													1.99458	7.75528		1.99375	5.93996
													1.99592	7.66611		1.99508	5.85985
													1.99725	7.57837		1.99642	5.78117
													1.99858	7.49111		1.99775	5.7025
													1.99992	7.4048		1.99908	5.62429
													2.00125	7.32088		2.00042	5.54752
													2.00258	7.23934		2.00175	5.47218
													2.00392	7.16066		2.00308	5.39827
													2.00525	7.08342		2.00442	5.32484
													2.00658	7.00712		2.00575	5.25236
													2.00792	6.93131		2.00708	5.18227
													2.00925	6.85597		2.00842	5.11408
													2.01058	6.78062		2.00975	5.04637
													2.01192	6.70624		2.01108	4.97913
													2.01325	6.63328		2.01242	4.91285
													2.01458	6.56271		2.01375	4.84848
													2.01592	6.49452		2.01508	4.78601
													2.01725	6.42872		2.01642	4.72593
													2.01858	6.36482		2.01775	4.66681
													2.01992	6.30093		2.01908	4.61006
													2.02125	6.23846		2.02042	4.5538
													2.02258	6.17695		2.02175	4.49848
													2.02392	6.11639		2.02308	4.44174
													2.02525	6.05774		2.02442	4.38404
													2.02658	5.99956		2.02575	4.32634
													2.02792	5.94282		2.02708	4.2696
													2.02925	5.88846		2.02842	4.21429
													2.03058	5.83553		2.02975	4.1604
													2.03192	5.78404		2.03108	4.10891
													2.03325	5.73397		2.03242	4.05931
													2.03458	5.68581		2.03375	4.01068
													2.03592	5.63908		2.03508	3.96204
													2.03725	5.5933		2.03642	3.91436
													2.03858	5.54752		2.03775	3.86763
													2.03992	5.50127		2.03908	3.82185
													2.04125	5.45549		2.04042	3.77655
													2.04258	5.40972		2.04175	3.73459
													2.04392	5.36442		2.04308	3.69978
													2.04525	5.31959		2.04442	3.66974
													2.04658	5.27573		2.04575	3.64018
													2.04792	5.23377		2.04708	3.60775
													2.04925	5.19323		2.04842	3.57103
													2.05058	5.15413		2.04975	3.53098
													2.05192	5.11646		2.05108	3.48377
													2.05325	5.07975		2.05242	3.43323
													2.05458	5.04351		2.05375	3.38268
													2.05592	5.00822		2.05508	3.33738
													2.05725	4.97436		2.05642	3.29637
													2.05858	4.94146		2.05775	3.25775
													2.05992	4.90904		2.05908	3.22247
													2.06125	4.87852		2.06042	3.18861
													2.06258	4.84848		2.06175	3.15571
													2.06392	4.81844		2.06308	3.12424
													2.06525	4.78888		2.06442	3.0942
													2.06658	4.75979		2.06575	3.06463
													2.06792	4.73118		2.06708	3.03459
													2.06925	4.70305		2.06842	3.00407
													2.07058	4.67586		2.06975	2.97403
													2.07192	4.65012		2.07108	2.94352
													2.07325	4.62484		2.07242	2.91348
													2.07458	4.60053		2.07375	2.88487
													2.07592	4.57668		2.07508	2.85673
													2.07725	4.55427		2.07642	2.82955
													2.07858	4.53186		2.07775	2.80237
													2.07992	4.5104		2.07908	2.77567
													2.08125	4.4899		2.08042	2.74897
													2.08258	4.47035		2.08175	2.72369
													2.08392	4.45127		2.08308	2.6989
													2.08525	4.43268		2.08442	2.67553
													2.08658	4.41456		2.08575	2.65265
													2.08792	4.39691		2.08708	2.62976
													2.08925	4.37975		2.08842	2.60687
													2.09058	4.36401		2.08975	2.58398
													2.09192	4.34971		2.09108	2.56157
													2.09325	4.33683		2.09242	2.53964
													2.09458	4.32396		2.09375	2.51865
													2.09592	4.31061		2.09508	2.49815
													2.09725	4.29773		2.09642	2.4786
													2.09858	4.28486		2.09775	2.46
													2.09992	4.27198		2.09908	2.44141
													2.10125	4.25959		2.10042	2.42281
													2.10258	4.24862		2.10175	2.40421
													2.10392	4.23908		2.10308	2.38562
													2.10525	4.2305		2.10442	2.36654
													2.10658	4.22096		2.10575	2.34747
													2.10792	4.21143		2.10708	2.32887
													2.10925	4.20189		2.10842	2.31075
													2.11058	4.19283		2.10975	2.29359
													2.11192	4.18425		2.11108	2.2769
													2.11325	4.17566		2.11242	2.26116
													2.11458	4.16803		2.11375	2.24638
													2.11592	4.16088		2.11508	2.2316
													2.11725	4.15468		2.11642	2.21634
													2.11858	4.14896		2.11775	2.20013
													2.11992	4.14419		2.11908	2.18344
													2.12125	4.13942		2.12042	2.16675
													2.12258	4.13609		2.12175	2.14958
													2.12392	4.13322		2.12308	2.13289
													2.12525	4.13132		2.12442	2.11716
													2.12658	4.12941		2.12575	2.10333
													2.12792	4.12798		2.12708	2.09045
													2.12925	4.12703		2.12842	2.07853
													2.13058	4.12703		2.12975	2.06709
													2.13192	4.1275		2.13108	2.05565
													2.13325	4.12703		2.13242	2.04468
													2.13458	4.12703		2.13375	2.03323
													2.13592	4.12703		2.13508	2.02131
													2.13725	4.12703		2.13642	2.00892
													2.13858	4.12655		2.13775	1.99604
													2.13992	4.12655		2.13908	1.98269
													2.14125	4.12655		2.14042	1.96934
													2.14258	4.12607		2.14175	1.95599
													2.14392	4.12655		2.14308	1.94359
													2.14525	4.12798		2.14442	1.93214
													2.14658	4.13084		2.14575	1.92165
													2.14792	4.1337		2.14708	1.91212
													2.14925	4.13704		2.14842	1.90353
													2.15058	4.14085		2.14975	1.89495
													2.15192	4.14515		2.15108	1.88685
													2.15325	4.14991		2.15242	1.87779
													2.15458	4.15468		2.15375	1.86825
													2.15592	4.15945		2.15508	1.85871
													2.15725	4.1647		2.15642	1.8487
													2.15858	4.17042		2.15775	1.83916
													2.15992	4.17709		2.15908	1.82962
													2.16125	4.18329		2.16042	1.82056
													2.16258	4.18901		2.16175	1.8115
													2.16392	4.19521		2.16308	1.8034
													2.16525	4.20332		2.16442	1.79577
													2.16658	4.21095		2.16575	1.78862
													2.16792	4.2181		2.16708	1.78146
													2.16925	4.2243		2.16842	1.77431
													2.17058	4.23145		2.16975	1.76764
													2.17192	4.23908		2.17108	1.76096
													2.17325	4.24719		2.17242	1.75428
													2.17458	4.2553		2.17375	1.74713
													2.17592	4.26483		2.17508	1.7395
													2.17725	4.2758		2.17642	1.73235
													2.17858	4.28724		2.17775	1.7252
													2.17992	4.29773		2.17908	1.71757
													2.18125	4.30822		2.18042	1.71042
													2.18258	4.31919		2.18175	1.70326
													2.18392	4.3292		2.18308	1.69706
													2.18525	4.33969		2.18442	1.69039
													2.18658	4.34971		2.18575	1.68371
													2.18792	4.3602		2.18708	1.67799
													2.18925	4.36974		2.18842	1.67227
													2.19058	4.38023		2.18975	1.66655
													2.19192	4.39119		2.19108	1.66035
													2.19325	4.40264		2.19242	1.65415
													2.19458	4.41456		2.19375	1.6489
													2.19592	4.42743		2.19508	1.64366
													2.19725	4.44126		2.19642	1.63889
													2.19858	4.45604		2.19775	1.63364
													2.19992	4.47035		2.19908	1.62888
													2.20125	4.48513		2.20042	1.62363
													2.20258	4.49991		2.20175	1.61838
													2.20392	4.51422		2.20308	1.61266
													2.20525	4.52757		2.20442	1.60599
													2.20658	4.5414		2.20575	1.59931
													2.20792	4.55618		2.20708	1.59359
													2.20925	4.57144		2.20842	1.58882
													2.21058	4.58574		2.20975	1.58453
													2.21192	4.601		2.21108	1.57929
													2.21325	4.61769		2.21242	1.57499
													2.21458	4.63438		2.21375	1.56975
													2.21592	4.65107		2.21508	1.56498
													2.21725	4.66824		2.21642	1.55973
													2.21858	4.68636		2.21775	1.55544
													2.21992	4.70495		2.21908	1.55163
													2.22125	4.72403		2.22042	1.54781
													2.22258	4.7431		2.22175	1.54448
													2.22392	4.76265		2.22308	1.54066
													2.22525	4.7822		2.22442	1.53637
													2.22658	4.8027		2.22575	1.53112
													2.22792	4.82273		2.22708	1.5254
													2.22925	4.84276		2.22842	1.52016
													2.23058	4.86278		2.22975	1.51539
													2.23192	4.88234		2.23108	1.5111
													2.23325	4.90236		2.23242	1.50776
													2.23458	4.92287		2.23375	1.50442
													2.23592	4.94432		2.23508	1.50108
													2.23725	4.96674		2.23642	1.49679
													2.23858	4.9901		2.23775	1.49202
													2.23992	5.01394		2.23908	1.48678
													2.24125	5.03731		2.24042	1.48153
													2.24258	5.06067		2.24175	1.47772
													2.24392	5.08451		2.24308	1.47486
													2.24525	5.10788		2.24442	1.47247
													2.24658	5.13172		2.24575	1.47104
													2.24792	5.15699		2.24708	1.46914
													2.24925	5.18322		2.24842	1.46723
													2.25058	5.2104		2.24975	1.46437
													2.25192	5.23806		2.25108	1.46151
													2.25325	5.26571		2.25242	1.45817
													2.25458	5.29289		2.25375	1.45435
													2.25592	5.32103		2.25508	1.45054
													2.25725	5.34916		2.25642	1.44625
													2.25858	5.37777		2.25775	1.44291
													2.25992	5.40686		2.25908	1.43957
													2.26125	5.43737		2.26042	1.43719
													2.26258	5.46884		2.26175	1.43385
													2.26392	5.50079		2.26308	1.43051
													2.26525	5.53369		2.26442	1.42765
													2.26658	5.56707		2.26575	1.42479
													2.26792	5.60093		2.26708	1.42145
													2.26925	5.63526		2.26842	1.41811
													2.27058	5.67007		2.26975	1.41478
													2.27192	5.70536		2.27108	1.41239
													2.27325	5.74064		2.27242	1.41048
													2.27458	5.7764		2.27375	1.40953
													2.27592	5.81264		2.27508	1.40858
													2.27725	5.84889		2.27642	1.4081
													2.27858	5.88512		2.27775	1.40667
													2.27992	5.92136		2.27908	1.40524
													2.28125	5.95856		2.28042	1.40238
													2.28258	5.9967		2.28175	1.39856
													2.28392	6.03533		2.28308	1.39475
													2.28525	6.07443		2.28442	1.39189
													2.28658	6.11401		2.28575	1.38903
													2.28792	6.15406		2.28708	1.38664
													2.28925	6.19459		2.28842	1.38569
													2.29058	6.23512		2.28975	1.38521
													2.29192	6.27661		2.29108	1.38426
													2.29325	6.31857		2.29242	1.38283
													2.29458	6.36149		2.29375	1.3814
													2.29592	6.40631		2.29508	1.37997
													2.29725	6.45113		2.29642	1.37854
													2.29858	6.49643		2.29775	1.37663
													2.29992	6.54221		2.29908	1.37472
													2.30125	6.58846		2.30042	1.37281
													2.30258	6.63471		2.30175	1.37043
													2.30392	6.68049		2.30308	1.36852
													2.30525	6.72817		2.30442	1.36566
													2.30658	6.77776		2.30575	1.36232
													2.30792	6.82831		2.30708	1.35946
													2.30925	6.87933		2.30842	1.35708
													2.31058	6.93274		2.30975	1.35613
													2.31192	6.99282		2.31108	1.36137
													2.31325	7.05481		2.31242	1.37567
													2.31458	7.11441		2.31375	1.39809
													2.31592	7.16877		2.31508	1.42145
													2.31725	7.21836		2.31642	1.43814
													2.31858	7.26223		2.31775	1.4472
													2.31992	7.30038		2.31908	1.44815
													2.32125	7.33519		2.32042	1.44148
													2.32258	7.37047		2.32175	1.42717
													2.32392	7.41053		2.32308	1.40953
													2.32525	7.45535		2.32442	1.39427
													2.32658	7.50446		2.32575	1.38331
													2.32792	7.55501		2.32708	1.37281
													2.32925	7.60508		2.32842	1.36089
													2.33058	7.65562		2.32975	1.34706
													2.33192	7.70617		2.33108	1.3361
													2.33325	7.75671		2.33242	1.32942
													2.33458	7.80678		2.33375	1.32561
													2.33592	7.85685		2.33508	1.3237
													2.33725	7.90834		2.33642	1.32132
													2.33858	7.9608		2.33775	1.31893
													2.33992	8.01373		2.33908	1.31702
													2.34125	8.06713		2.34042	1.31464
													2.34258	8.11863		2.34175	1.31226
													2.34392	8.16965		2.34308	1.31035
													2.34525	8.21972		2.34442	1.30892
													2.34658	8.26931		2.34575	1.30892
													2.34792	8.31938		2.34708	1.30844
													2.34925	8.36992		2.34842	1.30749
													2.35058	8.42142		2.34975	1.30606
													2.35192	8.47387		2.35108	1.30463
													2.35325	8.52632		2.35242	1.3032
													2.35458	8.57735		2.35375	1.30129
													2.35592	8.62741		2.35508	1.30034
													2.35725	8.67605		2.35642	1.2989
													2.35858	8.72326		2.35775	1.29747
													2.35992	8.76999		2.35908	1.29557
													2.36125	8.8172		2.36042	1.29271
													2.36258	8.8644		2.36175	1.28984
													2.36392	8.91161		2.36308	1.28794
													2.36525	8.95882		2.36442	1.28698
													2.36658	9.00555		2.36575	1.28698
													2.36792	9.05228		2.36708	1.28698
													2.36925	9.09853		2.36842	1.28698
													2.37058	9.14383		2.36975	1.28698
													2.37192	9.18865		2.37108	1.28603
													2.37325	9.23204		2.37242	1.28412
													2.37458	9.27544		2.37375	1.28222
													2.37592	9.31692		2.37508	1.28079
													2.37725	9.35793		2.37642	1.27935
													2.37858	9.39751		2.37775	1.2784
													2.37992	9.43661		2.37908	1.27745
													2.38125	9.47428		2.38042	1.27697
													2.38258	9.51099		2.38175	1.27649
													2.38392	9.54771		2.38308	1.27459
													2.38525	9.58395		2.38442	1.2722
													2.38658	9.61924		2.38575	1.26934
													2.38792	9.65357		2.38708	1.26696
													2.38925	9.68742		2.38842	1.26505
													2.39058	9.72033		2.38975	1.26362
													2.39192	9.75132		2.39108	1.26266
													2.39325	9.78088		2.39242	1.26219
													2.39458	9.81045		2.39375	1.26219
													2.39592	9.84001		2.39508	1.26171
													2.39725	9.8691		2.39642	1.26123
													2.39858	9.89676		2.39775	1.26123
													2.39992	9.92394		2.39908	1.26076
													2.40125	9.94873		2.40042	1.26123
													2.40258	9.97162		2.40175	1.26123
													2.40392	9.99355		2.40308	1.26219
													2.40525	10.0145		2.40442	1.26266
													2.40658	10.0355		2.40575	1.26266
													2.40792	10.0551		2.40708	1.26219
													2.40925	10.0746		2.40842	1.26076
													2.41058	10.0937		2.40975	1.25837
													2.41192	10.1118		2.41108	1.25599
													2.41325	10.129		2.41242	1.25313
													2.41458	10.1442		2.41375	1.25074
													2.41592	10.159		2.41508	1.24931
													2.41725	10.1738		2.41642	1.24788
													2.41858	10.1881		2.41775	1.24645
													2.41992	10.2014		2.41908	1.24598
													2.42125	10.2148		2.42042	1.24502
													2.42258	10.2277		2.42175	1.24455
													2.42392	10.2391		2.42308	1.24359
													2.42525	10.2482		2.42442	1.24359
													2.42658	10.2558		2.42575	1.24407
													2.42792	10.263		2.42708	1.24359
													2.42925	10.2706		2.42842	1.24359
													2.43058	10.2782		2.42975	1.24311
													2.43192	10.2868		2.43108	1.24264
													2.43325	10.2959		2.43242	1.24168
													2.43458	10.3035		2.43375	1.24073
													2.43592	10.3102		2.43508	1.23978
													2.43725	10.3164		2.43642	1.23978
													2.43858	10.3207		2.43775	1.23978
													2.43992	10.3245		2.43908	1.24073
													2.44125	10.3288		2.44042	1.24168
													2.44258	10.334		2.44175	1.24264
													2.44392	10.3397		2.44308	1.24359
													2.44525	10.3445		2.44442	1.24407
													2.44658	10.3498		2.44575	1.24407
													2.44792	10.3545		2.44708	1.24264
													2.44925	10.3598		2.44842	1.24073
													2.45058	10.3645		2.44975	1.23882
													2.45192	10.3698		2.45108	1.23644
													2.45325	10.376		2.45242	1.23358
													2.45458	10.3826		2.45375	1.23119
													2.45592	10.3893		2.45508	1.22976
													2.45725	10.3965		2.45642	1.22976
													2.45858	10.4041		2.45775	1.22976
													2.45992	10.4127		2.45908	1.23072
													2.46125	10.4227		2.46042	1.23215
													2.46258	10.4337		2.46175	1.23358
													2.46392	10.4446		2.46308	1.23453
													2.46525	10.4556		2.46442	1.23501
													2.46658	10.4666		2.46575	1.23596
													2.46792	10.478		2.46708	1.23739
													2.46925	10.4899		2.46842	1.23835
													2.47058	10.5043		2.46975	1.24025
													2.47192	10.5262		2.47108	1.24216
													2.47325	10.5572		2.47242	1.24311
													2.47458	10.5934		2.47375	1.24407
													2.47592	10.6296		2.47508	1.24359
													2.47725	10.663		2.47642	1.24264
													2.47858	10.6907		2.47775	1.24073
													2.47992	10.7107		2.47908	1.2393
													2.48125	10.7241		2.48042	1.23835
													2.48258	10.735		2.48175	1.23835
													2.48392	10.7484		2.48308	1.23882
													2.48525	10.7675		2.48442	1.24025
													2.48658	10.7942		2.48575	1.24168
													2.48792	10.8271		2.48708	1.24359
													2.48925	10.8638		2.48842	1.2455
													2.49058	10.9034		2.48975	1.24741
													2.49192	10.9463		2.49108	1.24836
													2.49325	10.9925		2.49242	1.24884
													2.49458	11.0421		2.49375	1.24931
													2.49592	11.0955		2.49508	1.24979
													2.49725	11.1527		2.49642	1.25027
													2.49858	11.2133		2.49775	1.25122
													2.49992	11.2777		2.49908	1.25265
													2.50125	11.3459		2.50042	1.25456
													2.50258	11.4183		2.50175	1.25742
													2.50392	11.4946		2.50308	1.2598
													2.50525	11.5743		2.50442	1.26219
													2.50658	11.6582		2.50575	1.26362
													2.50792	11.7478		2.50708	1.26553
													2.50925	11.8422		2.50842	1.26743
													2.51058	11.9424		2.50975	1.26934
													2.51192	12.0492		2.51108	1.27172
													2.51325	12.1627		2.51242	1.27459
													2.51458	12.2828		2.51375	1.27697
													2.51592	12.4092		2.51508	1.27983
													2.51725	12.5413		2.51642	1.28222
													2.51858	12.6796		2.51775	1.2846
													2.51992	12.8241		2.51908	1.28603
													2.52125	12.9762		2.52042	1.28794
													2.52258	13.1373		2.52175	1.2908
													2.52392	13.308		2.52308	1.29366
													2.52525	13.4893		2.52442	1.297
													2.52658	13.6805		2.52575	1.30081
													2.52792	13.8812		2.52708	1.3051
													2.52925	14.0929		2.52842	1.30844
													2.53058	14.3151		2.52975	1.31178
													2.53192	14.5478		2.53108	1.31512
													2.53325	14.7905		2.53242	1.31893
													2.53458	15.0442		2.53375	1.32322
													2.53592	15.3103		2.53508	1.32752
													2.53725	15.5883		2.53642	1.33228
													2.53858	15.8787		2.53775	1.33705
													2.53992	16.1815		2.53908	1.34182
													2.54125	16.4981		2.54042	1.34659
													2.54258	16.8281		2.54175	1.35088
													2.54392	17.1728		2.54308	1.35517
													2.54525	17.5319		2.54442	1.36042
													2.54658	17.9062		2.54575	1.36614
													2.54792	18.2948		2.54708	1.37186
													2.54925	18.6982		2.54842	1.37758
													2.55058	19.1169		2.54975	1.38283
													2.55192	19.5508		2.55108	1.38855
													2.55325	20.0005		2.55242	1.39332
													2.55458	20.4649		2.55375	1.39809
													2.55592	20.9456		2.55508	1.40333
													2.55725	21.4415		2.55642	1.40858
													2.55858	21.9526		2.55775	1.4143
													2.55992	22.4795		2.55908	1.42002
													2.56125	23.0212		2.56042	1.42527
													2.56258	23.5777		2.56175	1.43099
													2.56392	24.1504		2.56308	1.43623
													2.56525	24.7402		2.56442	1.44196
													2.56658	25.3458		2.56575	1.4472
													2.56792	25.9676		2.56708	1.45245
													2.56925	26.6056		2.56842	1.45769
													2.57058	27.2598		2.56975	1.46246
													2.57192	27.9288		2.57108	1.46723
													2.57325	28.6107		2.57242	1.472
													2.57458	29.305		2.57375	1.47677
													2.57592	30.0126		2.57508	1.48106
													2.57725	30.7331		2.57642	1.48582
													2.57858	31.4651		2.57775	1.49012
													2.57992	32.207		2.57908	1.49298
													2.58125	32.958		2.58042	1.49536
													2.58258	33.7172		2.58175	1.49679
													2.58392	34.483		2.58308	1.49822
													2.58525	35.255		2.58442	1.49918
													2.58658	36.0336		2.58575	1.49965
													2.58792	36.8209		2.58708	1.49965
													2.58925	37.6167		2.58842	1.49965
													2.59058	38.4211		2.58975	1.49822
													2.59192	39.2318		2.59108	1.49584
													2.59325	40.0467		2.59242	1.49155
													2.59458	40.8626		2.59375	1.48582
													2.59592	41.677		2.59508	1.47867
													2.59725	42.4895		2.59642	1.46961
													2.59858	43.2992		2.59775	1.45912
													2.59992	44.1055		2.59908	1.4472
													2.60125	44.9076		2.60042	1.4329
													2.60258	45.7039		2.60175	1.41716
													2.60392	46.493		2.60308	1.39904
													2.60525	47.2717		2.60442	1.37806
													2.60658	48.0371		2.60575	1.35422
													2.60792	48.7886		2.60708	1.32704
													2.60925	49.5257		2.60842	1.29652
													2.61058	50.2472		2.60975	1.26219
													2.61192	50.9539		2.61108	1.22404
													2.61325	51.6443		2.61242	1.1816
													2.61458	52.3171		2.61375	1.1363
													2.61592	52.9685		2.61508	1.08719
													2.61725	53.5951		2.61642	1.03331
													2.61858	54.1945		2.61775	0.974655
													2.61992	54.7638		2.61908	0.910759
													2.62125	55.3012		2.62042	0.841141
													2.62258	55.8038		2.62175	0.764847
													2.62392	56.2715		2.62308	0.680447
													2.62525	56.7021		2.62442	0.588894
													2.62658	57.0931		2.62575	0.490189
													2.62792	57.4412		2.62708	0.384331
													2.62925	57.7445		2.62842	0.26989
													2.63058	58.0006		2.62975	0.147343
													2.63192	58.2089		2.63108	0.014782
													2.63325	58.3687		2.63242	-0.12827
													2.63458	58.4798		2.63375	-0.28276
													2.63592	58.5413		2.63508	-0.45061
													2.63725	58.5499		2.63642	-0.63229
													2.63858	58.5041		2.63775	-0.83017
													2.63992	58.4011		2.63908	-1.0438
													2.64125	58.2385		2.64042	-1.27268
													2.64258	58.0144		2.64175	-1.51777
													2.64392	57.7283		2.64308	-1.78051
													2.64525	57.3788		2.64442	-2.06184
													2.64658	56.9658		2.64575	-2.36225
													2.64792	56.4895		2.64708	-2.68221
													2.64925	55.9502		2.64842	-3.02315
													2.65058	55.3484		2.64975	-3.38554
													2.65192	54.687		2.65108	-3.7694
													2.65325	53.9722		2.65242	-4.17376
													2.65458	53.2107		2.65375	-4.59862
													2.65592	52.4054		2.65508	-5.04303
													2.65725	51.5556		2.65642	-5.50508
													2.65858	50.6601		2.65775	-5.98288
													2.65992	49.7212		2.65908	-6.47593
													2.66125	48.7418		2.66042	-6.98185
													2.66258	47.7276		2.66175	-7.49874
													2.66392	46.689		2.66308	-8.02135
[truncated: 1,002 more rows]

## Sheet: Figure 2-figure supplement 1E
												CALHM2+SbC2			CALHM2
											Volume ml	Absorption		Volume ml	Absorption
											0.001167	-0.00954		0.001083	0.013828
											0.0025	-0.01001		0.002417	0.011921
											0.003833	-0.01097		0.00375	0.01049
											0.005167	-0.01097		0.005083	0.009537
											0.0065	-0.01097		0.006417	0.009537
											0.007833	-0.01144		0.00775	0.010014
											0.009167	-0.01192		0.009083	0.01049
											0.0105	-0.01144		0.010417	0.011921
											0.011833	-0.01097		0.01175	0.013351
											0.013167	-0.01049		0.013083	0.014782
											0.0145	-0.01049		0.014417	0.015736
											0.015833	-0.01001		0.01575	0.016212
											0.017167	-0.00954		0.017083	0.016689
											0.0185	-0.00906		0.018417	0.016212
											0.019833	-0.00858		0.01975	0.015259
											0.021167	-0.00763		0.021083	0.013828
											0.0225	-0.0062		0.022417	0.011921
											0.023833	-0.00525		0.02375	0.01049
											0.025167	-0.00429		0.025083	0.00906
											0.0265	-0.00334		0.026417	0.008583
											0.027833	-0.00238		0.02775	0.00906
											0.029167	-0.00191		0.029083	0.010014
											0.0305	-0.00143		0.030417	0.010967
											0.031833	-0.00143		0.03175	0.011444
											0.033167	-0.00143		0.033083	0.011921
											0.0345	-0.00048		0.034417	0.012398
											0.035833	0.000477		0.03575	0.012398
											0.037167	0		0.037083	0.012398
											0.0385	-0.00048		0.038417	0.012875
											0.039833	-0.00048		0.03975	0.013351
											0.041167	-0.00048		0.041083	0.013828
											0.0425	-0.00095		0.042417	0.013828
											0.043833	-0.00143		0.04375	0.013828
											0.045167	-0.00095		0.045083	0.014305
											0.0465	0		0.046417	0.015259
											0.047833	0.000477		0.04775	0.016212
											0.049167	0.000954		0.049083	0.016689
											0.0505	0.000954		0.050417	0.016689
											0.051833	0.001431		0.05175	0.016212
											0.053167	0.002384		0.053083	0.014782
											0.0545	0.002861		0.054417	0.013351
											0.055833	0.003338		0.05575	0.011921
											0.057167	0.004768		0.057083	0.011444
											0.0585	0.005722		0.058417	0.011444
											0.059833	0.006676		0.05975	0.010967
											0.061167	0.007153		0.061083	0.01049
											0.0625	0.007153		0.062417	0.01049
											0.063833	0.007153		0.06375	0.01049
											0.065167	0.006676		0.065083	0.010014
											0.0665	0.005722		0.066417	0.00906
											0.067833	0.004768		0.06775	0.008583
											0.069167	0.004292		0.069083	0.009537
											0.0705	0.003815		0.070417	0.010967
											0.071833	0.003338		0.07175	0.011921
											0.073167	0.003815		0.073083	0.012875
											0.0745	0.003815		0.074417	0.014305
											0.075833	0.003815		0.07575	0.014782
											0.077167	0.003815		0.077083	0.014782
											0.0785	0.003815		0.078417	0.013828
											0.079833	0.003815		0.07975	0.012875
											0.081167	0.003338		0.081083	0.012398
											0.0825	0.002384		0.082417	0.013351
											0.083833	0.002384		0.08375	0.014305
											0.085167	0.002861		0.085083	0.016212
											0.0865	0.002861		0.086417	0.016689
											0.087833	0.002861		0.08775	0.017166
											0.089167	0.003338		0.089083	0.016689
											0.0905	0.003338		0.090417	0.015736
											0.091833	0.002861		0.09175	0.013828
											0.093167	0.001907		0.093083	0.012398
											0.0945	0.000477		0.094417	0.011444
											0.095833	-0.00048		0.09575	0.011921
											0.097167	-0.00095		0.097083	0.013351
											0.0985	-0.00048		0.098417	0.014305
											0.099833	0		0.09975	0.014782
											0.101167	0.000477		0.101083	0.015736
											0.1025	0.000954		0.102417	0.016689
											0.103833	0.001907		0.10375	0.016689
											0.105167	0.001907		0.105083	0.015259
											0.1065	0.001907		0.106417	0.013828
											0.107833	0.001431		0.10775	0.012875
											0.109167	0.001431		0.109083	0.011444
											0.1105	0.001431		0.110417	0.01049
											0.111833	0.000954		0.11175	0.010014
											0.113167	0.000477		0.113083	0.010967
											0.1145	0.000477		0.114417	0.011921
											0.115833	0.000954		0.11575	0.012875
											0.117167	0.000477		0.117083	0.014305
											0.1185	0.000477		0.118417	0.015736
											0.119833	0.000477		0.11975	0.017166
											0.121167	0.000477		0.121083	0.018597
											0.1225	-0.00048		0.122417	0.01955
											0.123833	-0.00143		0.12375	0.020027
											0.125167	-0.00191		0.125083	0.020027
											0.1265	-0.00191		0.126417	0.020981
											0.127833	-0.00143		0.12775	0.021458
											0.129167	0		0.129083	0.021935
											0.1305	0.001431		0.130417	0.021458
											0.131833	0.002861		0.13175	0.020981
											0.133167	0.004292		0.133083	0.020027
											0.1345	0.004768		0.134417	0.019073
											0.135833	0.004768		0.13575	0.018597
											0.137167	0.005245		0.137083	0.01812
											0.1385	0.005245		0.138417	0.018597
											0.139833	0.005245		0.13975	0.018597
											0.141167	0.005722		0.141083	0.018597
											0.1425	0.005722		0.142417	0.016689
											0.143833	0.006199		0.14375	0.015259
											0.145167	0.006676		0.145083	0.013351
											0.1465	0.007629		0.146417	0.012875
											0.147833	0.008583		0.14775	0.012398
											0.149167	0.010014		0.149083	0.011921
											0.1505	0.010967		0.150417	0.011921
											0.151833	0.012398		0.15175	0.011444
											0.153167	0.012875		0.153083	0.01049
											0.1545	0.013351		0.154417	0.008583
											0.155833	0.013351		0.15575	0.006676
											0.157167	0.012875		0.157083	0.005722
											0.1585	0.012875		0.158417	0.005245
											0.159833	0.013351		0.15975	0.004768
											0.161167	0.013351		0.161083	0.004292
											0.1625	0.013828		0.162417	0.003815
											0.163833	0.013828		0.16375	0.002861
											0.165167	0.014305		0.165083	0.002384
											0.1665	0.014305		0.166417	0.002384
											0.167833	0.013828		0.16775	0.002861
											0.169167	0.013351		0.169083	0.003338
											0.1705	0.012875		0.170417	0.002861
											0.171833	0.012398		0.17175	0.003338
											0.173167	0.011921		0.173083	0.004292
											0.1745	0.011444		0.174417	0.005722
											0.175833	0.011444		0.17575	0.006676
											0.177167	0.011444		0.177083	0.007629
											0.1785	0.010967		0.178417	0.008583
											0.179833	0.010014		0.17975	0.00906
											0.181167	0.008583		0.181083	0.008106
											0.1825	0.007629		0.182417	0.005245
											0.183833	0.007153		0.18375	0.001907
											0.185167	0.007153		0.185083	-0.00095
											0.1865	0.007629		0.186417	-0.00286
											0.187833	0.008583		0.18775	-0.00286
											0.189167	0.008583		0.189083	-0.00191
											0.1905	0.007629		0.190417	0.000477
											0.191833	0.006199		0.19175	0.003338
											0.193167	0.004292		0.193083	0.006676
											0.1945	0.002861		0.194417	0.010014
											0.195833	0.002384		0.19575	0.012398
											0.197167	0.003338		0.197083	0.013828
											0.1985	0.004292		0.198417	0.014782
											0.199833	0.006199		0.19975	0.015736
											0.201167	0.008106		0.201083	0.015259
											0.2025	0.009537		0.202417	0.014782
											0.203833	0.010014		0.20375	0.013828
											0.205167	0.010014		0.205083	0.012875
											0.2065	0.009537		0.206417	0.011921
											0.207833	0.00906		0.20775	0.011444
											0.209167	0.008583		0.209083	0.010967
											0.2105	0.008106		0.210417	0.010967
											0.211833	0.008583		0.21175	0.010967
											0.213167	0.00906		0.213083	0.011444
											0.2145	0.010014		0.214417	0.010967
											0.215833	0.01049		0.21575	0.010014
											0.217167	0.011921		0.217083	0.008583
											0.2185	0.013351		0.218417	0.007629
											0.219833	0.014782		0.21975	0.006199
											0.221167	0.015736		0.221083	0.004768
											0.2225	0.017166		0.222417	0.003338
											0.223833	0.017643		0.22375	0.000954
											0.225167	0.017643		0.225083	-0.00143
											0.2265	0.017166		0.226417	-0.00477
											0.227833	0.017166		0.22775	-0.00763
											0.229167	0.016689		0.229083	-0.01001
											0.2305	0.016212		0.230417	-0.01049
											0.231833	0.016689		0.23175	-0.01049
											0.233167	0.017166		0.233083	-0.01001
											0.2345	0.017643		0.234417	-0.00906
											0.235833	0.017643		0.23575	-0.00858
											0.237167	0.017166		0.237083	-0.00906
											0.2385	0.016689		0.238417	-0.01049
											0.239833	0.016689		0.23975	-0.01097
											0.241167	0.016689		0.241083	-0.01097
											0.2425	0.017166		0.242417	-0.01097
											0.243833	0.017643		0.24375	-0.01144
											0.245167	0.017643		0.245083	-0.01287
											0.2465	0.017166		0.246417	-0.01383
											0.247833	0.016689		0.24775	-0.01526
											0.249167	0.015736		0.249083	-0.01621
											0.2505	0.014782		0.250417	-0.01574
											0.251833	0.014305		0.25175	-0.01383
											0.253167	0.015736		0.253083	-0.0124
											0.2545	0.01812		0.254417	-0.01097
											0.255833	0.020504		0.25575	-0.01049
											0.257167	0.022411		0.257083	-0.01097
											0.2585	0.023842		0.258417	-0.0124
											0.259833	0.024319		0.25975	-0.01431
											0.261167	0.023842		0.261083	-0.01526
											0.2625	0.022411		0.262417	-0.01621
											0.263833	0.020981		0.26375	-0.01621
											0.265167	0.020027		0.265083	-0.01621
											0.2665	0.01955		0.266417	-0.01526
											0.267833	0.01955		0.26775	-0.01478
											0.269167	0.020027		0.269083	-0.01478
											0.2705	0.020027		0.270417	-0.01431
											0.271833	0.01955		0.27175	-0.01335
											0.273167	0.01812		0.273083	-0.01144
											0.2745	0.016689		0.274417	-0.01001
											0.275833	0.015259		0.27575	-0.00858
											0.277167	0.014305		0.277083	-0.00763
											0.2785	0.014782		0.278417	-0.00763
											0.279833	0.016689		0.27975	-0.00763
											0.281167	0.01955		0.281083	-0.00906
											0.2825	0.022411		0.282417	-0.01049
											0.283833	0.024796		0.28375	-0.01144
											0.285167	0.025749		0.285083	-0.01192
											0.2865	0.025272		0.286417	-0.01335
											0.287833	0.023842		0.28775	-0.01478
											0.289167	0.021935		0.289083	-0.01621
											0.2905	0.020504		0.290417	-0.01764
											0.291833	0.019073		0.29175	-0.0186
											0.293167	0.018597		0.293083	-0.02003
											0.2945	0.018597		0.294417	-0.02098
											0.295833	0.01955		0.29575	-0.02289
											0.297167	0.020981		0.297083	-0.0248
											0.2985	0.021935		0.298417	-0.0267
											0.299833	0.022888		0.29975	-0.02861
											0.301167	0.023842		0.301083	-0.03004
											0.3025	0.025272		0.302417	-0.03052
											0.303833	0.026226		0.30375	-0.02956
											0.305167	0.02718		0.305083	-0.02909
											0.3065	0.02861		0.306417	-0.02909
											0.307833	0.030041		0.30775	-0.02909
											0.309167	0.031471		0.309083	-0.02956
											0.3105	0.031948		0.310417	-0.03099
											0.311833	0.032902		0.31175	-0.03242
											0.313167	0.033379		0.313083	-0.03386
											0.3145	0.033379		0.314417	-0.03529
											0.315833	0.033855		0.31575	-0.03576
											0.317167	0.034809		0.317083	-0.03624
											0.3185	0.035763		0.318417	-0.03672
											0.319833	0.035763		0.31975	-0.03719
											0.321167	0.035286		0.321083	-0.03767
											0.3225	0.034332		0.322417	-0.03862
											0.323833	0.033379		0.32375	-0.03958
											0.325167	0.032425		0.325083	-0.04053
											0.3265	0.032425		0.326417	-0.04053
											0.327833	0.033379		0.32775	-0.04053
											0.329167	0.033855		0.329083	-0.04101
											0.3305	0.034332		0.330417	-0.04196
											0.331833	0.033855		0.33175	-0.04292
											0.333167	0.033379		0.333083	-0.04292
											0.3345	0.033379		0.334417	-0.04292
											0.335833	0.032425		0.33575	-0.04339
											0.337167	0.032425		0.337083	-0.04387
											0.3385	0.031948		0.338417	-0.04435
											0.339833	0.032902		0.33975	-0.04482
											0.341167	0.033855		0.341083	-0.04673
											0.3425	0.034809		0.342417	-0.04911
											0.343833	0.035286		0.34375	-0.05102
											0.345167	0.035763		0.345083	-0.0515
											0.3465	0.036716		0.346417	-0.05102
											0.347833	0.036716		0.34775	-0.05007
											0.349167	0.036716		0.349083	-0.04959
											0.3505	0.03624		0.350417	-0.04864
											0.351833	0.03624		0.35175	-0.04721
											0.353167	0.03624		0.353083	-0.04625
											0.3545	0.036716		0.354417	-0.04625
											0.355833	0.036716		0.35575	-0.0453
											0.357167	0.036716		0.357083	-0.04387
											0.3585	0.03767		0.358417	-0.04244
											0.359833	0.038624		0.35975	-0.04148
											0.361167	0.039577		0.361083	-0.04101
											0.3625	0.040531		0.362417	-0.04053
											0.363833	0.041485		0.36375	-0.04053
											0.365167	0.041962		0.365083	-0.04148
											0.3665	0.041485		0.366417	-0.04244
											0.367833	0.041485		0.36775	-0.04387
											0.369167	0.041485		0.369083	-0.04435
											0.3705	0.041962		0.370417	-0.0453
											0.371833	0.042439		0.37175	-0.04673
											0.373167	0.043869		0.373083	-0.04864
											0.3745	0.044823		0.374417	-0.05054
											0.375833	0.046253		0.37575	-0.05293
											0.377167	0.047207		0.377083	-0.05531
											0.3785	0.047684		0.378417	-0.05722
											0.379833	0.048161		0.37975	-0.05627
											0.381167	0.048637		0.381083	-0.05484
											0.3825	0.048637		0.382417	-0.05293
											0.383833	0.049114		0.38375	-0.05293
											0.385167	0.049591		0.385083	-0.05341
											0.3865	0.049591		0.386417	-0.05484
											0.387833	0.050068		0.38775	-0.0577
											0.389167	0.049591		0.389083	-0.06104
											0.3905	0.049591		0.390417	-0.06247
											0.391833	0.048637		0.39175	-0.06199
											0.393167	0.048637		0.393083	-0.06104
											0.3945	0.049114		0.394417	-0.06008
											0.395833	0.050068		0.39575	-0.0596
											0.397167	0.051498		0.397083	-0.05913
											0.3985	0.052452		0.398417	-0.06056
											0.399833	0.053883		0.39975	-0.06294
											0.401167	0.054836		0.401083	-0.06533
											0.4025	0.05579		0.402417	-0.06676
											0.403833	0.056267		0.40375	-0.06723
											0.405167	0.056267		0.405083	-0.06866
											0.4065	0.055313		0.406417	-0.06914
											0.407833	0.054836		0.40775	-0.06914
											0.409167	0.053406		0.409083	-0.06866
											0.4105	0.051975		0.410417	-0.06914
											0.411833	0.051022		0.41175	-0.06962
											0.413167	0.051498		0.413083	-0.06962
											0.4145	0.052452		0.414417	-0.06819
											0.415833	0.053406		0.41575	-0.06723
											0.417167	0.055313		0.417083	-0.06723
											0.4185	0.05722		0.418417	-0.06676
											0.419833	0.058174		0.41975	-0.0658
											0.421167	0.058651		0.421083	-0.06485
											0.4225	0.059128		0.422417	-0.06485
											0.423833	0.059128		0.42375	-0.06437
											0.425167	0.058651		0.425083	-0.0639
											0.4265	0.058174		0.426417	-0.06294
											0.427833	0.057697		0.42775	-0.06199
											0.429167	0.058174		0.429083	-0.06247
											0.4305	0.058651		0.430417	-0.06294
											0.431833	0.059128		0.43175	-0.06342
											0.433167	0.060081		0.433083	-0.06437
											0.4345	0.060558		0.434417	-0.06437
											0.435833	0.060558		0.43575	-0.06437
											0.437167	0.060081		0.437083	-0.0639
											0.4385	0.060081		0.438417	-0.06342
											0.439833	0.060081		0.43975	-0.06294
											0.441167	0.060081		0.441083	-0.06294
											0.4425	0.060081		0.442417	-0.0639
											0.443833	0.060081		0.44375	-0.06533
											0.445167	0.060558		0.445083	-0.06676
											0.4465	0.061035		0.446417	-0.06723
											0.447833	0.061989		0.44775	-0.06723
											0.449167	0.062943		0.449083	-0.06723
											0.4505	0.063896		0.450417	-0.06676
											0.451833	0.06485		0.45175	-0.06628
											0.453167	0.065804		0.453083	-0.0658
											0.4545	0.066757		0.454417	-0.0658
											0.455833	0.067711		0.45575	-0.06628
											0.457167	0.067711		0.457083	-0.06628
											0.4585	0.067711		0.458417	-0.06628
											0.459833	0.067711		0.45975	-0.0658
											0.461167	0.067711		0.461083	-0.06437
											0.4625	0.068188		0.462417	-0.06437
											0.463833	0.068665		0.46375	-0.06485
											0.465167	0.069618		0.465083	-0.06628
											0.4665	0.070572		0.466417	-0.06723
											0.467833	0.071526		0.46775	-0.06819
											0.469167	0.072002		0.469083	-0.06914
											0.4705	0.072479		0.470417	-0.0701
											0.471833	0.072479		0.47175	-0.0701
											0.473167	0.072956		0.473083	-0.06962
											0.4745	0.072956		0.474417	-0.06962
											0.475833	0.072479		0.47575	-0.06962
											0.477167	0.072479		0.477083	-0.07057
											0.4785	0.072479		0.478417	-0.07105
											0.479833	0.072002		0.47975	-0.07057
											0.481167	0.072002		0.481083	-0.07057
											0.4825	0.071526		0.482417	-0.07105
											0.483833	0.071526		0.48375	-0.07105
											0.485167	0.071049		0.485083	-0.07057
											0.4865	0.071049		0.486417	-0.07057
											0.487833	0.071049		0.48775	-0.07057
											0.489167	0.071049		0.489083	-0.07057
											0.4905	0.070572		0.490417	-0.07057
											0.491833	0.070095		0.49175	-0.07153
											0.493167	0.070095		0.493083	-0.072
											0.4945	0.070095		0.494417	-0.07296
											0.495833	0.070572		0.49575	-0.07391
											0.497167	0.071049		0.497083	-0.07534
											0.4985	0.071526		0.498417	-0.07677
											0.499833	0.072002		0.49975	-0.07868
											0.501167	0.072479		0.501083	-0.08059
											0.5025	0.073433		0.502417	-0.08249
											0.503833	0.073433		0.50375	-0.0844
											0.505167	0.073433		0.505083	-0.08535
											0.5065	0.07391		0.506417	-0.08583
											0.507833	0.074863		0.50775	-0.08583
											0.509167	0.07534		0.509083	-0.08535
											0.5105	0.075817		0.510417	-0.08488
											0.511833	0.076294		0.51175	-0.08345
											0.513167	0.076771		0.513083	-0.08297
											0.5145	0.076771		0.514417	-0.08249
											0.515833	0.077248		0.51575	-0.08154
											0.517167	0.077248		0.517083	-0.08106
											0.5185	0.076771		0.518417	-0.08106
											0.519833	0.076771		0.51975	-0.08106
											0.521167	0.076294		0.521083	-0.08059
											0.5225	0.076771		0.522417	-0.08011
											0.523833	0.077248		0.52375	-0.08011
											0.525167	0.078201		0.525083	-0.08059
											0.5265	0.079155		0.526417	-0.08106
											0.527833	0.080109		0.52775	-0.08202
											0.529167	0.081539		0.529083	-0.08297
											0.5305	0.082493		0.530417	-0.0844
											0.531833	0.083447		0.53175	-0.08535
											0.533167	0.0844		0.533083	-0.08535
											0.5345	0.084877		0.534417	-0.08535
											0.535833	0.085831		0.53575	-0.08535
											0.537167	0.086784		0.537083	-0.08488
											0.5385	0.088215		0.538417	-0.08392
											0.539833	0.088692		0.53975	-0.08297
											0.541167	0.088692		0.541083	-0.08202
											0.5425	0.088692		0.542417	-0.08106
											0.543833	0.088215		0.54375	-0.08011
											0.545167	0.086784		0.545083	-0.07915
											0.5465	0.085354		0.546417	-0.07868
											0.547833	0.0844		0.54775	-0.0782
											0.549167	0.084877		0.549083	-0.0782
											0.5505	0.085354		0.550417	-0.07915
											0.551833	0.085354		0.55175	-0.08011
											0.553167	0.085831		0.553083	-0.08154
											0.5545	0.086308		0.554417	-0.08297
											0.555833	0.086784		0.55575	-0.08488
											0.557167	0.087261		0.557083	-0.08631
											0.5585	0.086784		0.558417	-0.08774
											0.559833	0.086308		0.55975	-0.08821
											0.561167	0.085831		0.561083	-0.08869
											0.5625	0.085831		0.562417	-0.08965
											0.563833	0.085354		0.56375	-0.09012
											0.565167	0.085354		0.565083	-0.09012
											0.5665	0.085354		0.566417	-0.08917
											0.567833	0.084877		0.56775	-0.08774
											0.569167	0.0844		0.569083	-0.08678
											0.5705	0.083447		0.570417	-0.08583
											0.571833	0.082016		0.57175	-0.0844
											0.573167	0.080585		0.573083	-0.08345
											0.5745	0.080585		0.574417	-0.08392
											0.575833	0.082493		0.57575	-0.08583
											0.577167	0.084877		0.577083	-0.08774
											0.5785	0.086784		0.578417	-0.08821
											0.579833	0.087738		0.57975	-0.08774
											0.581167	0.089169		0.581083	-0.08678
											0.5825	0.090122		0.582417	-0.08535
											0.583833	0.090122		0.58375	-0.0844
											0.585167	0.089645		0.585083	-0.08392
											0.5865	0.090122		0.586417	-0.08488
											0.587833	0.091553		0.58775	-0.08631
											0.589167	0.092983		0.589083	-0.08821
											0.5905	0.094891		0.590417	-0.0906
											0.591833	0.097275		0.59175	-0.09203
											0.593167	0.099659		0.593083	-0.09298
											0.5945	0.102043		0.594417	-0.09203
											0.595833	0.102997		0.59575	-0.09108
											0.597167	0.103474		0.597083	-0.0906
											0.5985	0.103474		0.598417	-0.0906
											0.599833	0.102043		0.59975	-0.09203
											0.601167	0.100613		0.601083	-0.09298
											0.6025	0.099659		0.602417	-0.09489
											0.603833	0.099182		0.60375	-0.0968
											0.605167	0.099659		0.605083	-0.09918
											0.6065	0.100136		0.606417	-0.10014
											0.607833	0.101566		0.60775	-0.09966
											0.609167	0.102997		0.609083	-0.09918
											0.6105	0.103951		0.610417	-0.10014
											0.611833	0.104427		0.61175	-0.10109
											0.613167	0.104904		0.613083	-0.10204
											0.6145	0.104904		0.614417	-0.10252
											0.615833	0.104427		0.61575	-0.10252
											0.617167	0.103474		0.617083	-0.103
											0.6185	0.10252		0.618417	-0.103
											0.619833	0.101089		0.61975	-0.103
											0.621167	0.100136		0.621083	-0.10252
											0.6225	0.099659		0.622417	-0.10204
											0.623833	0.099659		0.62375	-0.10204
											0.625167	0.100613		0.625083	-0.10157
											0.6265	0.102043		0.626417	-0.10061
											0.627833	0.102997		0.62775	-0.09918
											0.629167	0.103951		0.629083	-0.09871
											0.6305	0.104904		0.630417	-0.10014
											0.631833	0.105381		0.63175	-0.10204
											0.633167	0.104427		0.633083	-0.10443
											0.6345	0.103474		0.634417	-0.10633
											0.635833	0.102997		0.63575	-0.10729
											0.637167	0.10252		0.637083	-0.10633
											0.6385	0.102043		0.638417	-0.10443
											0.639833	0.101089		0.63975	-0.10204
											0.641167	0.100613		0.641083	-0.10109
											0.6425	0.100613		0.642417	-0.10109
											0.643833	0.101566		0.64375	-0.10204
											0.645167	0.10252		0.645083	-0.10395
											0.6465	0.102997		0.646417	-0.10586
											0.647833	0.103951		0.64775	-0.10777
											0.649167	0.105381		0.649083	-0.10872
											0.6505	0.106335		0.650417	-0.10967
											0.651833	0.106812		0.65175	-0.10967
											0.653167	0.107765		0.653083	-0.11015
											0.6545	0.108242		0.654417	-0.1111
											0.655833	0.108719		0.65575	-0.11206
											0.657167	0.109673		0.657083	-0.11206
											0.6585	0.109673		0.658417	-0.11253
											0.659833	0.109196		0.65975	-0.11349
											0.661167	0.108242		0.661083	-0.11539
											0.6625	0.107288		0.662417	-0.11683
											0.663833	0.107288		0.66375	-0.11826
											0.665167	0.107765		0.665083	-0.12016
											0.6665	0.108242		0.666417	-0.12159
											0.667833	0.109673		0.66775	-0.12112
											0.669167	0.11158		0.669083	-0.11969
											0.6705	0.11301		0.670417	-0.11873
											0.671833	0.114441		0.67175	-0.11778
											0.673167	0.114918		0.673083	-0.11683
											0.6745	0.114918		0.674417	-0.11683
											0.675833	0.114441		0.67575	-0.1173
											0.677167	0.113964		0.677083	-0.11873
											0.6785	0.113964		0.678417	-0.12016
											0.679833	0.114441		0.67975	-0.12207
											0.681167	0.114918		0.681083	-0.12445
											0.6825	0.115871		0.682417	-0.12636
											0.683833	0.116825		0.68375	-0.12779
											0.685167	0.117302		0.685083	-0.12779
											0.6865	0.116825		0.686417	-0.12779
											0.687833	0.116348		0.68775	-0.12684
											0.689167	0.116348		0.689083	-0.12493
											0.6905	0.116348		0.690417	-0.12398
											0.691833	0.116825		0.69175	-0.12398
											0.693167	0.118256		0.693083	-0.12445
											0.6945	0.119686		0.694417	-0.12398
											0.695833	0.12064		0.69575	-0.12398
											0.697167	0.121117		0.697083	-0.12493
											0.6985	0.12064		0.698417	-0.12589
											0.699833	0.119686		0.69975	-0.12732
											0.701167	0.119209		0.701083	-0.12875
											0.7025	0.118256		0.702417	-0.13018
											0.703833	0.117779		0.70375	-0.13113
											0.705167	0.118256		0.705083	-0.13065
											0.7065	0.118732		0.706417	-0.12922
											0.707833	0.120163		0.70775	-0.12732
											0.709167	0.121593		0.709083	-0.12636
											0.7105	0.122547		0.710417	-0.12541
											0.711833	0.122547		0.71175	-0.12589
											0.713167	0.12207		0.713083	-0.12636
											0.7145	0.121117		0.714417	-0.12732
											0.715833	0.119686		0.71575	-0.12779
											0.717167	0.118256		0.717083	-0.12827
											0.7185	0.117779		0.718417	-0.12779
											0.719833	0.117302		0.71975	-0.12684
											0.721167	0.117302		0.721083	-0.12589
											0.7225	0.116825		0.722417	-0.12589
											0.723833	0.117302		0.72375	-0.12589
											0.725167	0.117779		0.725083	-0.12636
											0.7265	0.117779		0.726417	-0.12684
											0.727833	0.118256		0.72775	-0.12779
											0.729167	0.118256		0.729083	-0.12875
											0.7305	0.118732		0.730417	-0.12875
											0.731833	0.119209		0.73175	-0.12827
											0.733167	0.118732		0.733083	-0.12732
											0.7345	0.118256		0.734417	-0.12636
											0.735833	0.118256		0.73575	-0.12589
											0.737167	0.118732		0.737083	-0.12589
											0.7385	0.119209		0.738417	-0.12684
											0.739833	0.120163		0.73975	-0.12827
											0.741167	0.12207		0.741083	-0.12922
											0.7425	0.123978		0.742417	-0.13018
											0.743833	0.126362		0.74375	-0.1297
											0.745167	0.128746		0.745083	-0.12875
											0.7465	0.130177		0.746417	-0.12779
											0.747833	0.13113		0.74775	-0.12732
											0.749167	0.131607		0.749083	-0.12779
											0.7505	0.131607		0.750417	-0.12827
											0.751833	0.130653		0.75175	-0.12922
											0.753167	0.1297		0.753083	-0.12922
											0.7545	0.129223		0.754417	-0.12875
											0.755833	0.128746		0.75575	-0.12732
											0.757167	0.128269		0.757083	-0.12589
											0.7585	0.128269		0.758417	-0.12445
											0.759833	0.128746		0.75975	-0.12302
											0.761167	0.129223		0.761083	-0.1235
											0.7625	0.129223		0.762417	-0.12445
											0.763833	0.1297		0.76375	-0.12541
											0.765167	0.130177		0.765083	-0.12589
											0.7665	0.130653		0.766417	-0.12541
											0.767833	0.130653		0.76775	-0.12541
											0.769167	0.130653		0.769083	-0.12541
											0.7705	0.1297		0.770417	-0.12493
											0.771833	0.128746		0.77175	-0.1235
											0.773167	0.128269		0.773083	-0.1235
											0.7745	0.127792		0.774417	-0.12493
											0.775833	0.128269		0.77575	-0.12732
											0.777167	0.1297		0.777083	-0.12875
											0.7785	0.13113		0.778417	-0.13065
											0.779833	0.132084		0.77975	-0.13208
											0.781167	0.133038		0.781083	-0.13351
											0.7825	0.133038		0.782417	-0.13351
											0.783833	0.133038		0.78375	-0.13304
											0.785167	0.132084		0.785083	-0.13208
											0.7865	0.131607		0.786417	-0.13161
											0.787833	0.130653		0.78775	-0.13065
											0.789167	0.1297		0.789083	-0.1297
											0.7905	0.129223		0.790417	-0.12922
											0.791833	0.1297		0.79175	-0.12922
											0.793167	0.130653		0.793083	-0.1297
											0.7945	0.131607		0.794417	-0.1297
											0.795833	0.13113		0.79575	-0.1297
											0.797167	0.130653		0.797083	-0.1297
											0.7985	0.130177		0.798417	-0.12922
											0.799833	0.1297		0.79975	-0.12922
											0.801167	0.128746		0.801083	-0.12922
											0.8025	0.128269		0.802417	-0.13018
											0.803833	0.128746		0.80375	-0.13018
											0.805167	0.1297		0.805083	-0.1297
											0.8065	0.130653		0.806417	-0.12922
											0.807833	0.131607		0.80775	-0.12827
											0.809167	0.132561		0.809083	-0.12732
											0.8105	0.133514		0.810417	-0.12732
											0.811833	0.134945		0.81175	-0.12875
											0.813167	0.135899		0.813083	-0.13065
											0.8145	0.135899		0.814417	-0.13208
											0.815833	0.135899		0.81575	-0.13351
											0.817167	0.135899		0.817083	-0.13494
											0.8185	0.135899		0.818417	-0.1359
											0.819833	0.136375		0.81975	-0.13542
											0.821167	0.138283		0.821083	-0.13542
											0.8225	0.14019		0.822417	-0.13542
											0.823833	0.142574		0.82375	-0.1359
											0.825167	0.143528		0.825083	-0.13685
											0.8265	0.144005		0.826417	-0.13781
											0.827833	0.144005		0.82775	-0.14019
											0.829167	0.142574		0.829083	-0.14257
											0.8305	0.141144		0.830417	-0.14353
											0.831833	0.139713		0.83175	-0.14305
											0.833167	0.13876		0.833083	-0.14114
											0.8345	0.138283		0.834417	-0.13828
											0.835833	0.138283		0.83575	-0.13542
											0.837167	0.139236		0.837083	-0.13208
											0.8385	0.140667		0.838417	-0.13018
											0.839833	0.142097		0.83975	-0.13018
											0.841167	0.143528		0.841083	-0.13161
											0.8425	0.144482		0.842417	-0.13256
											0.843833	0.144482		0.84375	-0.13304
											0.845167	0.143528		0.845083	-0.13351
											0.8465	0.142097		0.846417	-0.13351
											0.847833	0.141621		0.84775	-0.13351
											0.849167	0.141621		0.849083	-0.13304
											0.8505	0.141621		0.850417	-0.13208
											0.851833	0.142574		0.85175	-0.13161
											0.853167	0.144005		0.853083	-0.13161
											0.8545	0.144958		0.854417	-0.13304
											0.855833	0.145435		0.85575	-0.13494
											0.857167	0.145435		0.857083	-0.1359
											0.8585	0.145435		0.858417	-0.13733
											0.859833	0.144482		0.85975	-0.13828
											0.861167	0.143528		0.861083	-0.13876
											0.8625	0.142574		0.862417	-0.13828
											0.863833	0.142097		0.86375	-0.13685
											0.865167	0.140667		0.865083	-0.13447
											0.8665	0.139236		0.866417	-0.13256
											0.867833	0.138283		0.86775	-0.13065
											0.869167	0.138283		0.869083	-0.13018
											0.8705	0.13876		0.870417	-0.13065
											0.871833	0.139713		0.87175	-0.13113
											0.873167	0.140667		0.873083	-0.13304
											0.8745	0.142097		0.874417	-0.13542
											0.875833	0.143051		0.87575	-0.13828
											0.877167	0.143528		0.877083	-0.13924
											0.8785	0.144482		0.878417	-0.13971
											0.879833	0.145435		0.87975	-0.13924
											0.881167	0.146389		0.881083	-0.13924
											0.8825	0.147343		0.882417	-0.13828
											0.883833	0.148296		0.88375	-0.13638
											0.885167	0.149727		0.885083	-0.13494
											0.8865	0.150204		0.886417	-0.13494
											0.887833	0.149727		0.88775	-0.13542
											0.889167	0.149727		0.889083	-0.13542
											0.8905	0.150204		0.890417	-0.13638
											0.891833	0.150681		0.89175	-0.13685
											0.893167	0.150204		0.893083	-0.13733
											0.8945	0.149727		0.894417	-0.13781
											0.895833	0.150204		0.89575	-0.13828
											0.897167	0.150681		0.897083	-0.13828
											0.8985	0.151634		0.898417	-0.13781
											0.899833	0.152588		0.89975	-0.13828
											0.901167	0.153542		0.901083	-0.13828
											0.9025	0.154495		0.902417	-0.13733
											0.903833	0.154972		0.90375	-0.1359
											0.905167	0.154972		0.905083	-0.13494
											0.9065	0.154972		0.906417	-0.13494
											0.907833	0.154972		0.90775	-0.13447
											0.909167	0.155449		0.909083	-0.13304
											0.9105	0.156403		0.910417	-0.13256
											0.911833	0.157356		0.91175	-0.13161
											0.913167	0.157356		0.913083	-0.13018
											0.9145	0.157356		0.914417	-0.12875
											0.915833	0.157356		0.91575	-0.12827
											0.917167	0.15831		0.917083	-0.12875
											0.9185	0.158787		0.918417	-0.13018
											0.919833	0.15974		0.91975	-0.13208
											0.921167	0.160217		0.921083	-0.13447
											0.9225	0.161171		0.922417	-0.1359
											0.923833	0.161171		0.92375	-0.13733
											0.925167	0.160694		0.925083	-0.13781
											0.9265	0.15974		0.926417	-0.13924
											0.927833	0.15974		0.92775	-0.13971
											0.929167	0.15974		0.929083	-0.14019
											0.9305	0.15974		0.930417	-0.13971
											0.931833	0.15974		0.93175	-0.13876
											0.933167	0.160217		0.933083	-0.13781
											0.9345	0.160694		0.934417	-0.1359
											0.935833	0.160217		0.93575	-0.13304
											0.937167	0.159264		0.937083	-0.13018
											0.9385	0.158787		0.938417	-0.12875
											0.939833	0.158787		0.93975	-0.12827
											0.941167	0.159264		0.941083	-0.12779
											0.9425	0.15974		0.942417	-0.12732
											0.943833	0.160217		0.94375	-0.12779
											0.945167	0.160217		0.945083	-0.13018
											0.9465	0.160217		0.946417	-0.13113
											0.947833	0.160217		0.94775	-0.13161
											0.949167	0.160694		0.949083	-0.13113
											0.9505	0.161648		0.950417	-0.13161
											0.951833	0.163555		0.95175	-0.13113
											0.953167	0.165939		0.953083	-0.13018
											0.9545	0.167847		0.954417	-0.12922
											0.955833	0.1688		0.95575	-0.12875
											0.957167	0.169754		0.957083	-0.12779
											0.9585	0.169754		0.958417	-0.12589
											0.959833	0.170708		0.95975	-0.12541
											0.961167	0.170708		0.961083	-0.12541
											0.9625	0.171185		0.962417	-0.12636
											0.963833	0.172138		0.96375	-0.12779
											0.965167	0.172615		0.965083	-0.1297
											0.9665	0.172615		0.966417	-0.13161
											0.967833	0.172615		0.96775	-0.13304
											0.969167	0.173092		0.969083	-0.13447
											0.9705	0.173569		0.970417	-0.13542
											0.971833	0.174522		0.97175	-0.13685
											0.973167	0.174999		0.973083	-0.13781
											0.9745	0.175476		0.974417	-0.13828
											0.975833	0.175476		0.97575	-0.13828
											0.977167	0.175953		0.977083	-0.13781
											0.9785	0.175953		0.978417	-0.13733
											0.979833	0.175476		0.97975	-0.13685
											0.981167	0.174522		0.981083	-0.13685
											0.9825	0.173092		0.982417	-0.13781
											0.983833	0.172138		0.98375	-0.13828
											0.985167	0.171661		0.985083	-0.13828
											0.9865	0.171185		0.986417	-0.13781
											0.987833	0.170231		0.98775	-0.13638
											0.989167	0.169754		0.989083	-0.13447
											0.9905	0.170231		0.990417	-0.13256
											0.991833	0.170708		0.99175	-0.13065
											0.993167	0.170231		0.993083	-0.13065
											0.9945	0.169754		0.994417	-0.13208
											0.995833	0.169754		0.99575	-0.13399
											0.997167	0.170231		0.997083	-0.13638
											0.9985	0.170231		0.998417	-0.13924
											0.999833	0.169754		0.99975	-0.1421
											1.00117	0.169277		1.00108	-0.144
											1.0025	0.169277		1.00242	-0.14448
											1.00383	0.169754		1.00375	-0.144
											1.00517	0.170231		1.00508	-0.144
											1.0065	0.170231		1.00642	-0.14353
											1.00783	0.170708		1.00775	-0.14257
											1.00917	0.171661		1.00908	-0.14019
											1.0105	0.172138		1.01042	-0.13828
											1.01183	0.172615		1.01175	-0.13685
											1.01317	0.173092		1.01308	-0.13542
											1.0145	0.174046		1.01442	-0.13447
											1.01583	0.175953		1.01575	-0.13447
											1.01717	0.177383		1.01708	-0.13494
											1.0185	0.179291		1.01842	-0.13542
											1.01983	0.181675		1.01975	-0.13399
											1.02117	0.183105		1.02108	-0.13161
											1.0225	0.184059		1.02242	-0.12827
											1.02383	0.185013		1.02375	-0.12445
											1.02517	0.185966		1.02508	-0.12064
											1.0265	0.186443		1.02642	-0.11683
											1.02783	0.187397		1.02775	-0.11539
											1.02917	0.188351		1.02908	-0.11539
											1.0305	0.190258		1.03042	-0.11635
											1.03183	0.192642		1.03175	-0.11683
											1.03317	0.195026		1.03308	-0.11683
											1.0345	0.197411		1.03442	-0.11587
											1.03583	0.199795		1.03575	-0.11301
											1.03717	0.202656		1.03708	-0.10872
											1.0385	0.205994		1.03842	-0.103
											1.03983	0.208855		1.03975	-0.09632
											1.04117	0.212669		1.04108	-0.0906
											1.0425	0.216961		1.04242	-0.08488
											1.04383	0.221729		1.04375	-0.07915
											1.04517	0.226974		1.04508	-0.07296
											1.0465	0.231266		1.04642	-0.0658
											1.04783	0.235558		1.04775	-0.0577
											1.04917	0.240326		1.04908	-0.04864
											1.0505	0.245094		1.05042	-0.0391
											1.05183	0.25034		1.05175	-0.02956
											1.05317	0.255108		1.05308	-0.02003
											1.0545	0.260353		1.05442	-0.01097
											1.05583	0.266075		1.05575	-0.00286
											1.05717	0.272274		1.05708	0.005722
											1.0585	0.277996		1.05842	0.014782
											1.05983	0.284195		1.05975	0.025272
											1.06117	0.290871		1.06108	0.038147
											1.0625	0.2985		1.06242	0.052452
											1.06383	0.307083		1.06375	0.067711
											1.06517	0.316143		1.06508	0.083447
											1.0665	0.32568		1.06642	0.099182
											1.06783	0.336647		1.06775	0.114918
											1.06917	0.348091		1.06908	0.130177
											1.0705	0.360966		1.07042	0.145912
											1.07183	0.37384		1.07175	0.163078
											1.07317	0.388145		1.07308	0.182629
											1.0745	0.403404		1.07442	0.204086
											1.07583	0.420094		1.07575	0.227451
											1.07717	0.438213		1.07708	0.253677
											1.0785	0.457287		1.07842	0.281811
											1.07983	0.478745		1.07975	0.311375
											1.08117	0.50211		1.08108	0.341892
											1.0825	0.528336		1.08242	0.374317
											1.08383	0.555992		1.08375	0.409126
											1.08517	0.586033		1.08508	0.44632
											1.0865	0.619411		1.08642	0.484467
											1.08783	0.655174		1.08775	0.525475
											1.08917	0.693798		1.08908	0.570297
											1.0905	0.734806		1.09042	0.618458
											1.09183	0.777721		1.09175	0.671387
											1.09317	0.823975		1.09308	0.729084
											1.0945	0.872135		1.09442	0.79298
											1.09583	0.923157		1.09575	0.862598
											1.09717	0.976563		1.09708	0.937462
											1.0985	1.03331		1.09842	1.01757
											1.09983	1.09339		1.09975	1.10245
											1.10117	1.15681		1.10108	1.19209
											1.1025	1.22261		1.10242	1.28603
											1.10383	1.29032		1.10375	1.38426
											1.10517	1.35946		1.10508	1.4863
											1.1065	1.42956		1.10642	1.59359
											1.10783	1.50061		1.10775	1.70565
											1.10917	1.57309		1.10908	1.82247
											1.1105	1.64556		1.11042	1.9412
											1.11183	1.71852		1.11175	2.06232
											1.11317	1.79195		1.11308	2.18439
											1.1145	1.86539		1.11442	2.30646
											1.11583	1.93739		1.11575	2.42806
											1.11717	2.00892		1.11708	2.54869
											1.1185	2.07949		1.11842	2.67076
											1.11983	2.15006		1.11975	2.79427
											1.12117	2.22063		1.12108	2.91872
											1.1225	2.29168		1.12242	3.04222
											1.12383	2.36177		1.12375	3.16382
											1.12517	2.43092		1.12508	3.28207
											1.1265	2.49767		1.12642	3.39603
											1.12783	2.56252		1.12775	3.50523
											1.12917	2.62642		1.12908	3.61013
											1.1305	2.68888		1.13042	3.70979
											1.13183	2.75087		1.13175	3.80421
											1.13317	2.81239		1.13308	3.89337
											1.1345	2.87342		1.13442	3.97682
											1.13583	2.93398		1.13575	4.05502
											1.13717	2.99263		1.13708	4.12846
											1.1385	3.04842		1.13842	4.1976
											1.13983	3.10183		1.13975	4.26292
											1.14117	3.1538		1.14108	4.32444
											1.1425	3.20482		1.14242	4.38404
											1.14383	3.25537		1.14375	4.44031
											1.14517	3.30591		1.14508	4.49324
											1.1465	3.35693		1.14642	4.54235
											1.14783	3.40843		1.14775	4.5886
											1.14917	3.45898		1.14908	4.63247
											1.1505	3.50857		1.15042	4.673
											1.15183	3.55625		1.15175	4.7102
											1.15317	3.60298		1.15308	4.74453
											1.1545	3.64924		1.15442	4.77791
											1.15583	3.69597		1.15575	4.80986
											1.15717	3.74365		1.15708	4.83894
											1.1585	3.79229		1.15842	4.86565
											1.15983	3.84045		1.15975	4.8914
											1.16117	3.88765		1.16108	4.91619
											1.1625	3.93438		1.16242	4.93956
											1.16383	3.97921		1.16375	4.9634
											1.16517	4.02308		1.16508	4.98819
											1.1665	4.06551		1.16642	5.01251
											1.16783	4.10747		1.16775	5.0354
											1.16917	4.14896		1.16908	5.05686
											1.1705	4.18997		1.17042	5.07784
											1.17183	4.23145		1.17175	5.09834
											1.17317	4.27294		1.17308	5.11885
											1.1745	4.31442		1.17442	5.13983
											1.17583	4.35591		1.17575	5.16224
											1.17717	4.39787		1.17708	5.18513
											1.1785	4.44078		1.17842	5.20706
											1.17983	4.4837		1.17975	5.22804
											1.18117	4.52614		1.18108	5.24855
											1.1825	4.56905		1.18242	5.2681
											1.18383	4.61102		1.18375	5.28765
											1.18517	4.65298		1.18508	5.30815
											1.1865	4.69303		1.18642	5.32913
											1.18783	4.73261		1.18775	5.35059
											1.18917	4.77219		1.18908	5.37205
											1.1905	4.81224		1.19042	5.39398
											1.19183	4.85229		1.19175	5.41687
											1.19317	4.89235		1.19308	5.44024
											1.1945	4.93193		1.19442	5.4636
											1.19583	4.97055		1.19575	5.48744
											1.19717	5.00822		1.19708	5.51271
											1.1985	5.04589		1.19842	5.53846
											1.19983	5.08308		1.19975	5.56517
											1.20117	5.12171		1.20108	5.59139
											1.2025	5.16081		1.20242	5.6181
											1.20383	5.19991		1.20375	5.64384
											1.20517	5.23806		1.20508	5.66864
											1.2065	5.27525		1.20642	5.692
											1.20783	5.31197		1.20775	5.71442
											1.20917	5.34821		1.20908	5.73635
											1.2105	5.38397		1.21042	5.75876
											1.21183	5.41925		1.21175	5.78213
											1.21317	5.45502		1.21308	5.80692
											1.2145	5.49078		1.21442	5.83267
											1.21583	5.52607		1.21575	5.8589
											1.21717	5.5604		1.21708	5.88608
											1.2185	5.59425		1.21842	5.91326
											1.21983	5.62811		1.21975	5.94091
											1.22117	5.66244		1.22108	5.96905
											1.2225	5.69677		1.22242	5.99766
											1.22383	5.73206		1.22375	6.02722
											1.22517	5.76782		1.22508	6.05726
											1.2265	5.80454		1.22642	6.08873
											1.22783	5.84078		1.22775	6.12068
											1.22917	5.87654		1.22908	6.15311
											1.2305	5.91183		1.23042	6.1841
											1.23183	5.94616		1.23175	6.21366
											1.23317	5.98049		1.23308	6.24275
											1.2345	6.01387		1.23442	6.27136
											1.23583	6.04725		1.23575	6.30045
											1.23717	6.08063		1.23708	6.33049
											1.2385	6.11401		1.23842	6.36196
											1.23983	6.14834		1.23975	6.39534
											1.24117	6.18267		1.24108	6.42872
											1.2425	6.21653		1.24242	6.46305
											1.24383	6.25086		1.24375	6.49738
											1.24517	6.28567		1.24508	6.53124
											1.2465	6.32095		1.24642	6.56605
											1.24783	6.35672		1.24775	6.60181
											1.24917	6.39248		1.24908	6.639
											1.2505	6.42872		1.25042	6.6762
											1.25183	6.46544		1.25175	6.71387
											1.25317	6.5012		1.25308	6.75201
											1.2545	6.53648		1.25442	6.79016
											1.25583	6.57129		1.25575	6.82878
											1.25717	6.60753		1.25708	6.86789
											1.2585	6.64473		1.25842	6.90794
											1.25983	6.68335		1.25975	6.94895
											1.26117	6.72293		1.26108	6.99043
											1.2625	6.76298		1.26242	7.03144
											1.26383	6.80256		1.26375	7.07245
											1.26517	6.84166		1.26508	7.11393
											1.2665	6.87933		1.26642	7.15542
											1.26783	6.917		1.26775	7.19738
											1.26917	6.95467		1.26908	7.24029
											1.2705	6.99329		1.27042	7.28321
											1.27183	7.03287		1.27175	7.32708
											1.27317	7.07245		1.27308	7.3719
											1.2745	7.1125		1.27442	7.41577
											1.27583	7.15208		1.27575	7.46012
											1.27717	7.19118		1.27708	7.50637
											1.2785	7.2298		1.27842	7.55405
											1.27983	7.26938		1.27975	7.60222
											1.28117	7.31039		1.28108	7.65085
											1.2825	7.35187		1.28242	7.70044
											1.28383	7.39431		1.28375	7.75099
											1.28517	7.43771		1.28508	7.8001
											1.2865	7.48158		1.28642	7.84969
											1.28783	7.52497		1.28775	7.89976
											1.28917	7.56741		1.28908	7.95174
											1.2905	7.6108		1.29042	8.00371
											1.29183	7.65467		1.29175	8.05569
											1.29317	7.69949		1.29308	8.10766
											1.2945	7.74527		1.29442	8.16059
											1.29583	7.79152		1.29575	8.21304
											1.29717	7.8392		1.29708	8.26597
											1.2985	7.88784		1.29842	8.31842
											1.29983	7.93552		1.29975	8.37135
											1.30117	7.98321		1.30108	8.42571
											1.3025	8.03137		1.30242	8.48007
											1.30383	8.07953		1.30375	8.53538
											1.30517	8.12674		1.30508	8.5907
											1.3065	8.17299		1.30642	8.64696
											1.30783	8.21924		1.30775	8.70371
											1.30917	8.26693		1.30908	8.76093
											1.3105	8.31509		1.31042	8.82006
											1.31183	8.36372		1.31175	8.87966
											1.31317	8.41427		1.31308	8.93974
											1.3145	8.46672		1.31442	8.99982
											1.31583	8.51965		1.31575	9.06134
											1.31717	8.57258		1.31708	9.12285
											1.3185	8.62551		1.31842	9.18388
											1.31983	8.67844		1.31975	9.24444
											1.32117	8.73137		1.32108	9.30548
											1.3225	8.78382		1.32242	9.36699
											1.32383	8.83675		1.32375	9.4285
											1.32517	8.89063		1.32508	9.49097
											1.3265	8.94499		1.32642	9.55391
											1.32783	8.99982		1.32775	9.61685
											1.32917	9.05514		1.32908	9.67979
											1.3305	9.11093		1.33042	9.74274
											1.33183	9.16719		1.33175	9.80616
											1.33317	9.22346		1.33308	9.87005
											1.3345	9.28068		1.33442	9.93442
											1.33583	9.33933		1.33575	10.0002
											1.33717	9.39894		1.33708	10.0675
											1.3385	9.46045		1.33842	10.1347
											1.33983	9.52291		1.33975	10.2014
											1.34117	9.58633		1.34108	10.2663
											1.3425	9.64928		1.34242	10.3307
											1.34383	9.71174		1.34375	10.3936
											1.34517	9.77421		1.34508	10.4556
											1.3465	9.83572		1.34642	10.5185
											1.34783	9.89723		1.34775	10.5848
											1.34917	9.96017		1.34908	10.6535
											1.3505	10.0241		1.35042	10.7245
											1.35183	10.0889		1.35175	10.7965
											1.35317	10.1542		1.35308	10.869
											1.3545	10.2196		1.35442	10.9401
											1.35583	10.2854		1.35575	11.0087
											1.35717	10.3512		1.35708	11.075
											1.3585	10.417		1.35842	11.1408
											1.35983	10.4837		1.35975	11.2081
											1.36117	10.5519		1.36108	11.2772
											1.3625	10.622		1.36242	11.3473
											1.36383	10.6931		1.36375	11.4174
											1.36517	10.7646		1.36508	11.487
											1.3665	10.8366		1.36642	11.5557
											1.36783	10.9086		1.36775	11.6239
											1.36917	10.9806		1.36908	11.6911
											1.3705	11.0521		1.37042	11.7583
											1.37183	11.1237		1.37175	11.826
											1.37317	11.1957		1.37308	11.8961
											1.3745	11.2686		1.37442	11.9677
											1.37583	11.3425		1.37575	12.0397
											1.37717	11.4174		1.37708	12.1117
											1.3785	11.4932		1.37842	12.1851
											1.37983	11.569		1.37975	12.2595
											1.38117	11.6458		1.38108	12.3339
											1.3825	11.723		1.38242	12.4083
											1.38383	11.8012		1.38375	12.4817
											1.38517	11.8809		1.38508	12.5547
											1.3865	11.961		1.38642	12.6266
											1.38783	12.0425		1.38775	12.6982
											1.38917	12.1236		1.38908	12.7688
											1.3905	12.2042		1.39042	12.8393
											1.39183	12.2852		1.39175	12.9094
											1.39317	12.3658		1.39308	12.9795
											1.3945	12.4469		1.39442	13.0496
											1.39583	12.5284		1.39575	13.1202
											1.39717	12.6114		1.39708	13.1917
											1.3985	12.6958		1.39842	13.2632
											1.39983	12.7797		1.39975	13.3352
											1.40117	12.8646		1.40108	13.4082
											1.4025	12.9504		1.40242	13.4807
											1.40383	13.0377		1.40375	13.5536
											1.40517	13.1264		1.40508	13.6261
											1.4065	13.216		1.40642	13.7005
											1.40783	13.3066		1.40775	13.7744
											1.40917	13.3982		1.40908	13.8464
											1.4105	13.4897		1.41042	13.916
											1.41183	13.5808		1.41175	13.9847
											1.41317	13.6714		1.41308	14.0529
											1.4145	13.7625		1.41442	14.1206
											1.41583	13.854		1.41575	14.1873
											1.41717	13.9456		1.41708	14.2565
											1.4185	14.0376		1.41842	14.328
											1.41983	14.1296		1.41975	14.4
											1.42117	14.2221		1.42108	14.471
											1.4225	14.3151		1.42242	14.5412
											1.42383	14.4081		1.42375	14.6117
											1.42517	14.5025		1.42508	14.6823
											1.4265	14.5974		1.42642	14.7529
											1.42783	14.6937		1.42775	14.823
											1.42917	14.7915		1.42908	14.8931
											1.4305	14.8902		1.43042	14.9632
											1.43183	14.9899		1.43175	15.0333
											1.43317	15.0895		1.43308	15.1024
											1.4345	15.1882		1.43442	15.1715
											1.43583	15.2869		1.43575	15.2411
											1.43717	15.3847		1.43708	15.3112
											1.4385	15.4829		1.43842	15.3823
											1.43983	15.5811		1.43975	15.4529
											1.44117	15.6803		1.44108	15.5234
											1.4425	15.7809		1.44242	15.5935
											1.44383	15.883		1.44375	15.6646
											1.44517	15.985		1.44508	15.7347
											1.4465	16.0871		1.44642	15.8048
											1.44783	16.1877		1.44775	15.8753
											1.44917	16.2883		1.44908	15.9454
											1.4505	16.3894		1.45042	16.0155
											1.45183	16.4905		1.45175	16.0861
											1.45317	16.5925		1.45308	16.1572
											1.4545	16.696		1.45442	16.2273
											1.45583	16.8009		1.45575	16.2959
											1.45717	16.9058		1.45708	16.3636
											1.4585	17.0107		1.45842	16.4318
											1.45983	17.1146		1.45975	16.4995
											1.46117	17.2186		1.46108	16.5672
											1.4625	17.3221		1.46242	16.6359
											1.46383	17.4255		1.46375	16.705
											1.46517	17.53		1.46508	16.7747
											1.4665	17.6349		1.46642	16.8448
											1.46783	17.7412		1.46775	16.9153
											1.46917	17.8475		1.46908	16.9864
											1.4705	17.9539		1.47042	17.0574
											1.47183	18.0597		1.47175	17.1289
											1.47317	18.1656		1.47308	17.2014
											1.4745	18.2724		1.47442	17.2739
											1.47583	18.3806		1.47575	17.345
											1.47717	18.4903		1.47708	17.4141
											1.4785	18.6019		1.47842	17.4832
											1.47983	18.7135		1.47975	17.5524
											1.48117	18.8251		1.48108	17.6206
											1.4825	18.9357		1.48242	17.6887
											1.48383	19.0449		1.48375	17.7569
											1.48517	19.1531		1.48508	17.827
											1.4865	19.2618		1.48642	17.8976
											1.48783	19.3701		1.48775	17.9682
											1.48917	19.4788		1.48908	18.0378
											1.4905	19.588		1.49042	18.1069
											1.49183	19.6986		1.49175	18.1761
											1.49317	19.8097		1.49308	18.2466
											1.4945	19.9213		1.49442	18.3177
											1.49583	20.0348		1.49575	18.3902
											1.49717	20.1507		1.49708	18.4631
											1.4985	20.2675		1.49842	18.5375
											1.49983	20.3862		1.49975	18.6119
											1.50117	20.505		1.50108	18.6858
											1.5025	20.6242		1.50242	18.7578
											1.50383	20.7429		1.50375	18.8284
											1.50517	20.8611		1.50508	18.8985
											1.5065	20.9799		1.50642	18.97
											1.50783	21.0991		1.50775	19.042
											1.50917	21.2192		1.50908	19.115
											1.5105	21.3408		1.51042	19.1889
											1.51183	21.4639		1.51175	19.2647
											1.51317	21.5874		1.51308	19.341
											1.5145	21.7118		1.51442	19.4178
											1.51583	21.8372		1.51575	19.4941
											1.51717	21.9636		1.51708	19.5708
											1.5185	22.0919		1.51842	19.6486
											1.51983	22.2225		1.51975	19.7258
											1.52117	22.3556		1.52108	19.8045
											1.5225	22.49		1.52242	19.8841
											1.52383	22.6255		1.52375	19.9647
											1.52517	22.7618		1.52508	20.0453
											1.5265	22.8991		1.52642	20.1259
											1.52783	23.0374		1.52775	20.2069
											1.52917	23.1776		1.52908	20.288
											1.5305	23.3202		1.53042	20.3695
											1.53183	23.4661		1.53175	20.4516
											1.53317	23.6149		1.53308	20.5345
											1.5345	23.7656		1.53442	20.617
											1.53583	23.9177		1.53575	20.7005
											1.53717	24.0703		1.53708	20.7848
											1.5385	24.2238		1.53842	20.8693
											1.53983	24.3802		1.53975	20.9551
											1.54117	24.539		1.54108	21.0428
											1.5425	24.7011		1.54242	21.1325
											1.54383	24.8675		1.54375	21.2245
											1.54517	25.0373		1.54508	21.3184
											1.5465	25.2104		1.54642	21.4152
											1.54783	25.3868		1.54775	21.5139
											1.54917	25.5656		1.54908	21.6131
											1.5505	25.7473		1.55042	21.7128
											1.55183	25.9309		1.55175	21.8134
											1.55317	26.1178		1.55308	21.9154
											1.5545	26.3085		1.55442	22.0175
											1.55583	26.5021		1.55575	22.121
											1.55717	26.6991		1.55708	22.2259
											1.5585	26.8993		1.55842	22.3331
											1.55983	27.1044		1.55975	22.4423
											1.56117	27.3137		1.56108	22.5525
											1.5625	27.5278		1.56242	22.665
											1.56383	27.7472		1.56375	22.7795
											1.56517	27.9717		1.56508	22.8953
											1.5665	28.2016		1.56642	23.0122
											1.56783	28.4357		1.56775	23.1309
											1.56917	28.6746		1.56908	23.2511
											1.5705	28.9168		1.57042	23.3722
											1.57183	29.1624		1.57175	23.4942
											1.57317	29.4123		1.57308	23.6182
											1.5745	29.6659		1.57442	23.7455
											1.57583	29.9254		1.57575	23.8752
											1.57717	30.1905		1.57708	24.0068
											1.5785	30.4613		1.57842	24.1408
											1.57983	30.7379		1.57975	24.2777
											1.58117	31.0197		1.58108	24.4184
											1.5825	31.3072		1.58242	24.5609
											1.58383	31.599		1.58375	24.7068
											1.58517	31.8961		1.58508	24.8556
											1.5865	32.1994		1.58642	25.0072
											1.58783	32.5089		1.58775	25.1617
											1.58917	32.8264		1.58908	25.3177
											1.5905	33.1507		1.59042	25.4746
											1.59183	33.4816		1.59175	25.6329
											1.59317	33.8178		1.59308	25.7935
											1.5945	34.1597		1.59442	25.9566
											1.59583	34.5054		1.59575	26.1226
											1.59717	34.8544		1.59708	26.2928
											1.5985	35.2087		1.59842	26.4683
											1.59983	35.5692		1.59975	26.6476
											1.60117	35.9368		1.60108	26.8283
											1.6025	36.3111		1.60242	27.0124
											1.60383	36.6926		1.60375	27.1988
											1.60517	37.0808		1.60508	27.3886
											1.6065	37.4742		1.60642	27.5793
											1.60783	37.8728		1.60775	27.7739
											1.60917	38.2776		1.60908	27.9722
											1.6105	38.6896		1.61042	28.1749
											1.61183	39.1097		1.61175	28.379
											1.61317	39.5365		1.61308	28.584
											1.6145	39.9685		1.61442	28.7909
											1.61583	40.4053		1.61575	28.9989
											1.61717	40.8459		1.61708	29.2082
											1.6185	41.2903		1.61842	29.4194
											1.61983	41.7399		1.61975	29.6345
											1.62117	42.1972		1.62108	29.8538
											1.6225	42.6617		1.62242	30.077
											1.62383	43.1333		1.62375	30.3054
											1.62517	43.611		1.62508	30.5376
											1.6265	44.0927		1.62642	30.7736
											1.62783	44.5776		1.62775	31.0116
											1.62917	45.0654		1.62908	31.2514
											1.6305	45.557		1.63042	31.4937
											1.63183	46.0539		1.63175	31.7392
											1.63317	46.557		1.63308	31.9881
											1.6345	47.0662		1.63442	32.2404
											1.63583	47.5807		1.63575	32.4955
											1.63717	48.1005		1.63708	32.753
											1.6385	48.6236		1.63842	33.0114
											1.63983	49.1481		1.63975	33.2699
											1.64117	49.6745		1.64108	33.5298
											1.6425	50.2019		1.64242	33.7915
											1.64383	50.7317		1.64375	34.0562
											1.64517	51.2638		1.64508	34.3251
											1.6465	51.7993		1.64642	34.6003
											1.64783	52.3386		1.64775	34.8806
											1.64917	52.8817		1.64908	35.1639
											1.6505	53.4272		1.65042	35.4481
											1.65183	53.9732		1.65175	35.7337
											1.65317	54.5206		1.65308	36.0208
											1.6545	55.0685		1.65442	36.3073
											1.65583	55.6169		1.65575	36.5934
											1.65717	56.1671		1.65708	36.881
											1.6585	56.7193		1.65842	37.1699
											1.65983	57.2734		1.65975	37.4594
											1.66117	57.8275		1.66108	37.7483
											1.6625	58.3801		1.66242	38.0368
											1.66383	58.9299		1.66375	38.3253
											1.66517	59.4759		1.66508	38.6143
											1.6665	60.019		1.66642	38.9047
											1.66783	60.5583		1.66775	39.197
											1.66917	61.0962		1.66908	39.4921
											1.6705	61.6331		1.67042	39.7897
											1.67183	62.1686		1.67175	40.0891
											1.67317	62.7017		1.67308	40.3891
											1.6745	63.2319		1.67442	40.6904
											1.67583	63.7579		1.67575	40.9942
											1.67717	64.2805		1.67708	41.2989
											1.6785	64.7998		1.67842	41.6036
											1.67983	65.3171		1.67975	41.9064
											1.68117	65.8326		1.68108	42.2063
											1.6825	66.3452		1.68242	42.5024
											1.68383	66.853		1.68375	42.7938
											1.68517	67.3542		1.68508	43.0813
											1.6865	67.8482		1.68642	43.3679
											1.68783	68.3336		1.68775	43.6554
											1.68917	68.8114		1.68908	43.9453
											1.6905	69.283		1.69042	44.2362
											1.69183	69.7484		1.69175	44.5285
											1.69317	70.2086		1.69308	44.8194
											1.6945	70.6625		1.69442	45.1083
											1.69583	71.1107		1.69575	45.3949
											1.69717	71.5504		1.69708	45.6791
											1.6985	71.9814		1.69842	45.9609
											1.69983	72.4039		1.69975	46.2418
											1.70117	72.8192		1.70108	46.5212
											1.7025	73.2269		1.70242	46.7968
											1.70383	73.626		1.70375	47.0686
											1.70517	74.0166		1.70508	47.3347
											1.7065	74.3976		1.70642	47.5941
											1.70783	74.77		1.70775	47.8482
											1.70917	75.1333		1.70908	48.0976
											1.7105	75.4862		1.71042	48.3456
											1.71183	75.8295		1.71175	48.5921
											1.71317	76.1633		1.71308	48.8391
											1.7145	76.4866		1.71442	49.0851
											1.71583	76.7984		1.71575	49.3302
											1.71717	77.0988		1.71708	49.5715
											1.7185	77.3878		1.71842	49.8095
											1.71983	77.6649		1.71975	50.0426
											1.72117	77.9314		1.72108	50.2725
											1.7225	78.1879		1.72242	50.499
											1.72383	78.4349		1.72375	50.7221
											1.72517	78.6729		1.72508	50.941
											1.7265	78.9013		1.72642	51.1537
											1.72783	79.1197		1.72775	51.3587
											1.72917	79.3271		1.72908	51.5566
											1.7305	79.5231		1.73042	51.7464
											1.73183	79.7052		1.73175	51.9309
											1.73317	79.8736		1.73308	52.1107
											1.7345	80.029		1.73442	52.2876
											1.73583	80.1716		1.73575	52.4612
											1.73717	80.3027		1.73708	52.6304
											1.7385	80.4224		1.73842	52.7959
											1.73983	80.5302		1.73975	52.9575
											1.74117	80.627		1.74108	53.1139
											1.7425	80.7128		1.74242	53.266
											1.74383	80.7867		1.74375	53.4134
											1.74517	80.8501		1.74508	53.556
											1.7465	80.9026		1.74642	53.6923
											1.74783	80.945		1.74775	53.8206
											1.74917	80.9765		1.74908	53.9398
											1.7505	80.9956		1.75042	54.0509
											1.75183	81.0032		1.75175	54.1539
											1.75317	80.9989		1.75308	54.2493
											1.7545	80.9813		1.75442	54.338
											1.75583	80.9512		1.75575	54.4209
											1.75717	80.9093		1.75708	54.4977
											1.7585	80.8568		1.75842	54.5702
											1.75983	80.7939		1.75975	54.6374
											1.76117	80.719		1.76108	54.6999
											1.7625	80.6327		1.76242	54.7562
											1.76383	80.5354		1.76375	54.8077
											1.76517	80.4267		1.76508	54.8534
											1.7665	80.307		1.76642	54.8935
											1.76783	80.1773		1.76775	54.9269
											1.76917	80.0381		1.76908	54.9541
											1.7705	79.8902		1.77042	54.9741
											1.77183	79.7329		1.77175	54.9855
											1.77317	79.566		1.77308	54.9879
											1.7745	79.3886		1.77442	54.9812
											1.77583	79.2017		1.77575	54.966
											1.77717	79.0043		1.77708	54.9417
											1.7785	78.7969		1.77842	54.9097
											1.77983	78.5799		1.77975	54.872
											1.78117	78.3539		1.78108	54.8291
											1.7825	78.1188		1.78242	54.7805
											1.78383	77.8742		1.78375	54.7261
											1.78517	77.6196		1.78508	54.666
											1.7865	77.3544		1.78642	54.6002
											1.78783	77.0807		1.78775	54.5282
											1.78917	76.7989		1.78908	54.4486
											1.7905	76.5104		1.79042	54.3618
											1.79183	76.2157		1.79175	54.2688
											1.79317	75.9153		1.79308	54.1692
											1.7945	75.6087		1.79442	54.0619
											1.79583	75.2959		1.79575	53.9475
											1.79717	74.976		1.79708	53.8263
											1.7985	74.646		1.79842	53.7
											1.79983	74.307		1.79975	53.5679
											1.80117	73.9594		1.80108	53.4306
											1.8025	73.6046		1.80242	53.2875
											1.80383	73.2431		1.80375	53.1373
											1.80517	72.8755		1.80508	52.98
											1.8065	72.5031		1.80642	52.8159
											1.80783	72.1264		1.80775	52.6452
											1.80917	71.7444		1.80908	52.4678
											1.8105	71.3582		1.81042	52.2857
											1.81183	70.9672		1.81175	52.0992
											1.81317	70.5724		1.81308	51.909
											1.8145	70.1747		1.81442	51.7135
											1.81583	69.7737		1.81575	51.5108
											1.81717	69.3665		1.81708	51.302
											1.8185	68.9516		1.81842	51.0869
											1.81983	68.5301		1.81975	50.8671
											1.82117	68.1028		1.82108	50.6415
											1.8225	67.6723		1.82242	50.4108
											1.82383	67.2393		1.82375	50.1757
											1.82517	66.8063		1.82508	49.9368
											1.8265	66.3743		1.82642	49.6926
											1.82783	65.9418		1.82775	49.4432
											1.82917	65.5065		1.82908	49.1877
											1.8305	65.0659		1.83042	48.9287
											1.83183	64.6205		1.83175	48.6651
											1.83317	64.1713		1.83308	48.3971
											1.8345	63.7202		1.83442	48.1253
											1.83583	63.2687		1.83575	47.8511
											1.83717	62.818		1.83708	47.575
											1.8385	62.3689		1.83842	47.2937
											1.83983	61.9178		1.83975	47.0071
											1.84117	61.4624		1.84108	46.7157
											1.8425	61.0022		1.84242	46.4206
											1.84383	60.5378		1.84375	46.1225
											1.84517	60.0715		1.84508	45.8207
											1.8465	59.6042		1.84642	45.517
											1.84783	59.1378		1.84775	45.2113
											1.84917	58.6743		1.84908	44.9033
											1.8505	58.2128		1.85042	44.5914
											1.85183	57.7507		1.85175	44.2748
											1.85317	57.2872		1.85308	43.9544
											1.8545	56.8218		1.85442	43.6311
											1.85583	56.3555		1.85575	43.3059
											1.85717	55.8886		1.85708	42.9792
											1.8585	55.4237		1.85842	42.6521
											1.85983	54.9612		1.85975	42.3236
											1.86117	54.5011		1.86108	41.9927
											1.8625	54.0414		1.86242	41.6579
											1.86383	53.5803		1.86375	41.3208
											1.86517	53.1178		1.86508	40.9827
											1.8665	52.6547		1.86642	40.6446
											1.86783	52.1927		1.86775	40.307
											1.86917	51.7321		1.86908	39.968
											1.8705	51.2757		1.87042	39.629
											1.87183	50.8246		1.87175	39.2885
											1.87317	50.3783		1.87308	38.9457
											1.8745	49.9339		1.87442	38.6
											1.87583	49.489		1.87575	38.2523
											1.87717	49.0432		1.87708	37.9043
											1.8785	48.5983		1.87842	37.5566
											1.87983	48.1544		1.87975	37.21
											1.88117	47.7138		1.88108	36.8633
											1.8825	47.277		1.88242	36.5176
											1.88383	46.8473		1.88375	36.1729
											1.88517	46.4239		1.88508	35.8281
											1.8865	46.0024		1.88642	35.4815
											1.88783	45.5799		1.88775	35.1329
											1.88917	45.1551		1.88908	34.7838
											1.8905	44.7278		1.89042	34.4357
											1.89183	44.3001		1.89175	34.0896
											1.89317	43.8738		1.89308	33.7453
											1.8945	43.4508		1.89442	33.4044
											1.89583	43.0341		1.89575	33.0667
											1.89717	42.6235		1.89708	32.7296
											1.8985	42.2163		1.89842	32.3906
											1.89983	41.8119		1.89975	32.0492
											1.90117	41.4085		1.90108	31.7063
											1.9025	41.0066		1.90242	31.3644
											1.90383	40.6065		1.90375	31.0249
											1.90517	40.2112		1.90508	30.6883
											1.9065	39.8207		1.90642	30.354
											1.90783	39.434		1.90775	30.0212
											1.90917	39.0487		1.90908	29.6884
											1.9105	38.6643		1.91042	29.357
											1.91183	38.2819		1.91175	29.0284
											1.91317	37.9024		1.91308	28.7037
											1.9145	37.5271		1.91442	28.3814
											1.91583	37.1575		1.91575	28.0619
											1.91717	36.7942		1.91708	27.7443
											1.9185	36.437		1.91842	27.4277
											1.91983	36.0842		1.91975	27.1091
											1.92117	35.7337		1.92108	26.7901
											1.9225	35.3842		1.92242	26.4726
											1.92383	35.037		1.92375	26.1593
											1.92517	34.6928		1.92508	25.8508
											1.9265	34.3523		1.92642	25.5461
											1.92783	34.0171		1.92775	25.2433
											1.92917	33.6866		1.92908	24.9424
											1.9305	33.36		1.93042	24.6406
											1.93183	33.0362		1.93175	24.3382
											1.93317	32.7129		1.93308	24.0378
											1.9345	32.3906		1.93442	23.7408
											1.93583	32.0706		1.93575	23.4489
											1.93717	31.754		1.93708	23.1624
											1.9385	31.4417		1.93842	22.881
											1.93983	31.1356		1.93975	22.6026
											1.94117	30.8351		1.94108	22.325
											1.9425	30.54		1.94242	22.0456
											1.94383	30.2477		1.94375	21.7652
											1.94517	29.9568		1.94508	21.4853
											1.9465	29.6679		1.94642	21.2078
											1.94783	29.3808		1.94775	20.9341
											1.94917	29.0971		1.94908	20.6647
											1.9505	28.8181		1.95042	20.3986
											1.95183	28.5439		1.95175	20.1359
											1.95317	28.2736		1.95308	19.8755
											1.9545	28.0066		1.95442	19.6156
											1.95583	27.7405		1.95575	19.3577
											1.95717	27.4754		1.95708	19.1021
											1.9585	27.2117		1.95842	18.8508
											1.95983	26.9504		1.95975	18.6038
											1.96117	26.6929		1.96108	18.3597
											1.9625	26.4397		1.96242	18.1179
											1.96383	26.1927		1.96375	17.8776
											1.96517	25.9495		1.96508	17.6373
											1.9665	25.7096		1.96642	17.3988
											1.96783	25.4707		1.96775	17.1623
											1.96917	25.2342		1.96908	16.9296
											1.9705	25.0006		1.97042	16.7007
											1.97183	24.7703		1.97175	16.4762
											1.97317	24.5442		1.97308	16.2549
											1.9745	24.3239		1.97442	16.0351
											1.97583	24.1094		1.97575	15.8153
											1.97717	23.8986		1.97708	15.5964
											1.9785	23.6874		1.97842	15.3785
											1.97983	23.4757		1.97975	15.1629
											1.98117	23.2634		1.98108	14.9512
											1.9825	23.0513		1.98242	14.7443
											1.98383	22.8405		1.98375	14.5435
											1.98517	22.6331		1.98508	14.3466
											1.9865	22.4314		1.98642	14.1516
											1.98783	22.2344		1.98775	13.9575
											1.98917	22.0418		1.98908	13.7634
											1.9905	21.8511		1.99042	13.5708
											1.99183	21.6618		1.99175	13.3796
											1.99317	21.4744		1.99308	13.1903
											1.9945	21.2898		1.99442	13.0043
											1.99583	21.1086		1.99575	12.8212
											1.99717	20.9308		1.99708	12.6414
											1.9985	20.7562		1.99842	12.4636
											1.99983	20.5841		1.99975	12.2862
											2.00117	20.4129		2.00108	12.1107
											2.0025	20.2422		2.00242	11.9386
											2.00383	20.0729		2.00375	11.7717
											2.00517	19.9056		2.00508	11.6076
											2.0065	19.7411		2.00642	11.446
											2.00783	19.5808		2.00775	11.2863
											2.00917	19.4249		2.00908	11.127
											2.0105	19.2733		2.01042	10.9672
											2.01183	19.1245		2.01175	10.808
											2.01317	18.9772		2.01308	10.6502
											2.0145	18.8303		2.01442	10.4952
											2.01583	18.6844		2.01575	10.344
											2.01717	18.5394		2.01708	10.1962
											2.0185	18.3973		2.01842	10.0522
											2.01983	18.2581		2.01975	9.90963
											2.02117	18.1227		2.02108	9.76849
											2.0225	17.9896		2.02242	9.62687
											2.02383	17.858		2.02375	9.48667
											2.02517	17.7274		2.02508	9.34887
											2.0265	17.5977		2.02642	9.21488
											2.02783	17.4685		2.02775	9.08422
											2.02917	17.3407		2.02908	8.95596
											2.0305	17.2148		2.03042	8.82959
											2.03183	17.0922		2.03175	8.70514
											2.03317	16.9725		2.03308	8.58211
											2.0345	16.8548		2.03442	8.45957
											2.03583	16.7389		2.03575	8.3375
											2.03717	16.6249		2.03708	8.21781
											2.0385	16.5124		2.03842	8.10051
											2.03983	16.4022		2.03975	7.98607
											2.04117	16.294		2.04108	7.87306
											2.0425	16.1886		2.04242	7.76148
											2.04383	16.0861		2.04375	7.65181
											2.04517	15.9855		2.04508	7.54309
											2.0465	15.8858		2.04642	7.43485
											2.04783	15.7871		2.04775	7.32946
											2.04917	15.6884		2.04908	7.22647
											2.0505	15.5907		2.05042	7.12633
											2.05183	15.4929		2.05175	7.02858
											2.05317	15.3976		2.05308	6.93369
											2.0545	15.305		2.05442	6.84071
											2.05583	15.2154		2.05575	6.74772
											2.05717	15.1277		2.05708	6.65474
											2.0585	15.0423		2.05842	6.56033
											2.05983	14.9584		2.05975	6.46687
											2.06117	14.8754		2.06108	6.37531
											2.0625	14.7939		2.06242	6.28614
											2.06383	14.7142		2.06375	6.19936
											2.06517	14.6375		2.06508	6.11544
											2.0665	14.5631		2.06642	6.0339
											2.06783	14.4901		2.06775	5.95284
											2.06917	14.4172		2.06908	5.8713
											2.0705	14.3437		2.07042	5.78976
											2.07183	14.2703		2.07175	5.70869
											2.07317	14.1969		2.07308	5.62859
											2.0745	14.1249		2.07442	5.55086
											2.07583	14.0557		2.07575	5.47552
											2.07717	13.9899		2.07708	5.40209
											2.0785	13.9275		2.07842	5.33009
											2.07983	13.8664		2.07975	5.25951
											2.08117	13.8063		2.08108	5.19037
											2.0825	13.7472		2.08242	5.12218
											2.08383	13.6881		2.08375	5.05543
											2.08517	13.6294		2.08508	4.98915
											2.0865	13.5717		2.08642	4.9243
											2.08783	13.5164		2.08775	4.85992
											2.08917	13.4625		2.08908	4.79412
											2.0905	13.4091		2.09042	4.72784
											2.09183	13.3562		2.09175	4.66251
											2.09317	13.3038		2.09308	4.59862
											2.0945	13.2518		2.09442	4.53615
											2.09583	13.2003		2.09575	4.47559
											2.09717	13.1507		2.09708	4.41742
											2.0985	13.1025		2.09842	4.36163
											2.09983	13.0572		2.09975	4.30679
											2.10117	13.0138		2.10108	4.25196
											2.1025	12.9728		2.10242	4.19807
											2.10383	12.9337		2.10375	4.14372
											2.10517	12.8951		2.10508	4.09031
											2.1065	12.8565		2.10642	4.03786
											2.10783	12.8188		2.10775	3.98779
											2.10917	12.7816		2.10908	3.93915
											2.1105	12.7449		2.11042	3.89099
											2.11183	12.7096		2.11175	3.84378
											2.11317	12.6753		2.11308	3.79705
											2.1145	12.6424		2.11442	3.7508
											2.11583	12.61		2.11575	3.70359
											2.11717	12.5775		2.11708	3.65782
											2.1185	12.5465		2.11842	3.61347
											2.11983	12.516		2.11975	3.57103
											2.12117	12.4869		2.12108	3.5305
											2.1225	12.4588		2.12242	3.48997
											2.12383	12.4321		2.12375	3.44992
											2.12517	12.4083		2.12508	3.40986
											2.1265	12.3858		2.12642	3.36885
											2.12783	12.3639		2.12775	3.3288
											2.12917	12.342		2.12908	3.28922
											2.1305	12.32		2.13042	3.25108
											2.13183	12.2986		2.13175	3.21484
											2.13317	12.2776		2.13308	3.17907
											2.1345	12.2566		2.13442	3.14426
											2.13583	12.2361		2.13575	3.10898
											2.13717	12.2175		2.13708	3.07274
											2.1385	12.1994		2.13842	3.0365
											2.13983	12.1822		2.13975	2.99978
											2.14117	12.166		2.14108	2.96545
											2.1425	12.1498		2.14242	2.93255
											2.14383	12.1346		2.14375	2.90155
											2.14517	12.1212		2.14508	2.87199
											2.1465	12.1102		2.14642	2.84433
											2.14783	12.1002		2.14775	2.81763
											2.14917	12.0921		2.14908	2.7895
											2.1505	12.0845		2.15042	2.76041
											2.15183	12.0773		2.15175	2.73085
											2.15317	12.0702		2.15308	2.70224
											2.1545	12.064		2.15442	2.6741
											2.15583	12.0583		2.15575	2.64645
											2.15717	12.0544		2.15708	2.61879
											2.1585	12.0511		2.15842	2.59256
											2.15983	12.0492		2.15975	2.56681
											2.16117	12.0473		2.16108	2.54059
											2.1625	12.0454		2.16242	2.51436
											2.16383	12.044		2.16375	2.48861
											2.16517	12.043		2.16508	2.46477
											2.1665	12.0444		2.16642	2.44284
											2.16783	12.0473		2.16775	2.42138
											2.16917	12.0521		2.16908	2.40088
											2.1705	12.0583		2.17042	2.37989
											2.17183	12.0664		2.17175	2.35891
											2.17317	12.0749		2.17308	2.33698
											2.1745	12.084		2.17442	2.31409
											2.17583	12.0945		2.17575	2.29168
											2.17717	12.1064		2.17708	2.2707
											2.1785	12.1203		2.17842	2.24972
											2.17983	12.1365		2.17975	2.22874
											2.18117	12.1536		2.18108	2.20871
											2.1825	12.1722		2.18242	2.18964
											2.18383	12.1918		2.18375	2.17199
											2.18517	12.2127		2.18508	2.15387
											2.1865	12.2352		2.18642	2.13671
											2.18783	12.2595		2.18775	2.1205
											2.18917	12.2857		2.18908	2.10524
											2.1905	12.3134		2.19042	2.08998
											2.19183	12.3439		2.19175	2.07424
											2.19317	12.3758		2.19308	2.05755
											2.1945	12.4092		2.19442	2.04134
											2.19583	12.444		2.19575	2.0256
											2.19717	12.4812		2.19708	2.00892
											2.1985	12.5208		2.19842	1.99175
											2.19983	12.5618		2.19975	1.97506
											2.20117	12.6047		2.20108	1.9598
											2.2025	12.6491		2.20242	1.94502
											2.20383	12.6953		2.20375	1.92976
											2.20517	12.743		2.20508	1.91402
											2.2065	12.7926		2.20642	1.89924
											2.20783	12.8441		2.20775	1.88541
											2.20917	12.8975		2.20908	1.87159
											2.2105	12.9528		2.21042	1.85823
											2.21183	13.01		2.21175	1.84536
											2.21317	13.0692		2.21308	1.83344
											2.2145	13.1307		2.21442	1.82104
											2.21583	13.1941		2.21575	1.80817
											2.21717	13.2589		2.21708	1.79482
											2.2185	13.3257		2.21842	1.78051
											2.21983	13.3939		2.21975	1.76716
											2.22117	13.464		2.22108	1.75476
											2.2225	13.535		2.22242	1.74284
											2.22383	13.6085		2.22375	1.7314
											2.22517	13.6828		2.22508	1.71948
											2.2265	13.7582		2.22642	1.70755
											2.22783	13.8354		2.22775	1.69563
											2.22917	13.9141		2.22908	1.68419
											2.2305	13.9937		2.23042	1.67227
											2.23183	14.0748		2.23175	1.66082
											2.23317	14.1568		2.23308	1.64986
											2.2345	14.2403		2.23442	1.63841
											2.23583	14.3237		2.23575	1.62745
											2.23717	14.4081		2.23708	1.61743
											2.2385	14.4935		2.23842	1.60742
											2.23983	14.5788		2.23975	1.59693
											2.24117	14.6651		2.24108	1.58691
											2.2425	14.7519		2.24242	1.57833
											2.24383	14.8392		2.24375	1.56927
											2.24517	14.9274		2.24508	1.55878
											2.2465	15.0166		2.24642	1.54781
											2.24783	15.1062		2.24775	1.53828
											2.24917	15.1954		2.24908	1.52969
											2.2505	15.2845		2.25042	1.52063
											2.25183	15.3727		2.25175	1.51205
											2.25317	15.461		2.25308	1.5049
											2.2545	15.5487		2.25442	1.49822
											2.25583	15.6355		2.25575	1.49059
											2.25717	15.7227		2.25708	1.48249
											2.2585	15.8091		2.25842	1.47438
											2.25983	15.8954		2.25975	1.46532
											2.26117	15.9807		2.26108	1.45578
											2.2625	16.0656		2.26242	1.44577
											2.26383	16.1505		2.26375	1.43623
											2.26517	16.2349		2.26508	1.42765
											2.2665	16.3188		2.26642	1.41907
											2.26783	16.4018		2.26775	1.41001
											2.26917	16.4847		2.26908	1.40095
											2.2705	16.5672		2.27042	1.39189
											2.27183	16.6492		2.27175	1.38426
											2.27317	16.7313		2.27308	1.37615
											2.2745	16.8123		2.27442	1.369
											2.27583	16.8929		2.27575	1.3628
											2.27717	16.9711		2.27708	1.35756
											2.2785	17.0474		2.27842	1.35183
											2.27983	17.1223		2.27975	1.34563
											2.28117	17.1971		2.28108	1.33848
											2.2825	17.271		2.28242	1.33228
											2.28383	17.345		2.28375	1.32608
											2.28517	17.4189		2.28508	1.32036
											2.2865	17.4937		2.28642	1.31369
											2.28783	17.5695		2.28775	1.30701
											2.28917	17.6449		2.28908	1.30081
											2.2905	17.7207		2.29042	1.29366
											2.29183	17.7965		2.29175	1.28651
											2.29317	17.8728		2.29308	1.27888
											2.2945	17.9491		2.29442	1.27268
											2.29583	18.0273		2.29575	1.26696
											2.29717	18.1093		2.29708	1.26123
											2.2985	18.1952		2.29842	1.25599
											2.29983	18.2867		2.29975	1.25074
											2.30117	18.3864		2.30108	1.2455
											2.3025	18.4975		2.30242	1.23978
											2.30383	18.6229		2.30375	1.2331
											2.30517	18.7683		2.30508	1.22643
											2.3065	18.9414		2.30642	1.21927
											2.30783	19.1536		2.30775	1.2126
											2.30917	19.4149		2.30908	1.20592
											2.3105	19.7391		2.31042	1.19877
											2.31183	20.1402		2.31175	1.19257
											2.31317	20.6351		2.31308	1.18732
											2.3145	21.2407		2.31442	1.1816
											2.31583	21.9741		2.31575	1.17493
											2.31717	22.8491		2.31708	1.16777
											2.3185	23.879		2.31842	1.16158
											2.31983	25.0754		2.31975	1.15538
											2.32117	26.4449		2.32108	1.14918
											2.3225	27.9903		2.32242	1.14393
											2.32383	29.7108		2.32375	1.14012
											2.32517	31.6052		2.32508	1.13678
											2.3265	33.669		2.32642	1.13344
											2.32783	35.8949		2.32775	1.12963
											2.32917	38.2743		2.32908	1.12581
											2.3305	40.7968		2.33042	1.12009
											2.33183	43.4499		2.33175	1.11342
											2.33317	46.2198		2.33308	1.10674
											2.3345	49.0899		2.33442	1.10054
											2.33583	52.0458		2.33575	1.09482
											2.33717	55.0728		2.33708	1.0891
											2.3385	58.1579		2.33842	1.0829
											2.33983	61.2874		2.33975	1.07765
											2.34117	64.4498		2.34108	1.07193
											2.3425	67.6327		2.34242	1.06525
											2.34383	70.8246		2.34375	1.05858
											2.34517	74.0142		2.34508	1.05286
											2.3465	77.1875		2.34642	1.04809
											2.34783	80.3366		2.34775	1.0438
											2.34917	83.4537		2.34908	1.03903
											2.3505	86.5354		2.35042	1.03521
											2.35183	89.5796		2.35175	1.0314
											2.35317	92.5841		2.35308	1.02711
											2.3545	95.5472		2.35442	1.02138
											2.35583	98.4635		2.35575	1.01566
											2.35717	101.327		2.35708	1.00946
											2.3585	104.134		2.35842	1.00327
											2.35983	106.878		2.35975	0.99659
											2.36117	109.561		2.36108	0.990868
											2.3625	112.184		2.36242	0.986099
											2.36383	114.753		2.36375	0.982285
											2.36517	117.276		2.36508	0.97847
											2.3665	119.754		2.36642	0.974178
											2.36783	122.185		2.36775	0.969887
											2.36917	124.566		2.36908	0.965595
											2.3705	126.895		2.37042	0.96035
											2.37183	129.171		2.37175	0.954628
											2.37317	131.399		2.37308	0.94986
											2.3745	133.581		2.37442	0.945568
											2.37583	135.726		2.37575	0.941277
											2.37717	137.84		2.37708	0.936031
											2.3785	139.924		2.37842	0.930309
											2.37983	141.975		2.37975	0.926018
											2.38117	143.992		2.38108	0.92268
											2.3825	145.969		2.38242	0.918865
											2.38383	147.907		2.38375	0.915051
											2.38517	149.806		2.38508	0.912189
											2.3865	151.67		2.38642	0.909805
											2.38783	153.499		2.38775	0.906467
											2.38917	155.297		2.38908	0.902176
											2.3905	157.062		2.39042	0.897408
											2.39183	158.789		2.39175	0.893116
											2.39317	160.474		2.39308	0.888348
											2.3945	162.116		2.39442	0.883102
											2.39583	163.714		2.39575	0.87738
											2.39717	165.268		2.39708	0.872135
											2.3985	166.783		2.39842	0.865936
											2.39983	168.261		2.39975	0.859261
											2.40117	169.704		2.40108	0.853539
											2.4025	171.112		2.40242	0.84734
											2.40383	172.48		2.40375	0.841618
											2.40517	173.806		2.40508	0.836372
											2.4065	175.086		2.40642	0.832081
											2.40783	176.321		2.40775	0.827789
											2.40917	177.509		2.40908	0.822544
											2.4105	178.655		2.41042	0.816345
											2.41183	179.758		2.41175	0.811577
											2.41317	180.82		2.41308	0.807762
											2.4145	181.836		2.41442	0.803947
											2.41583	182.803		2.41575	0.800133
											2.41717	183.719		2.41708	0.798225
											2.4185	184.582		2.41842	0.796795
											2.41983	185.391		2.41975	0.793934
											2.42117	186.148		2.42108	0.789165
											2.4225	186.856		2.42242	0.784397
											2.42383	187.517		2.42375	0.779629
											2.42517	188.131		2.42508	0.775337
											2.4265	188.698		2.42642	0.771046
											2.42783	189.216		2.42775	0.766754
											2.42917	189.683		2.42908	0.762939
											2.4305	190.098		2.43042	0.758648
											2.43183	190.463		2.43175	0.754833
											2.43317	190.777		2.43308	0.751019
											2.4345	191.041		2.43442	0.748158
											2.43583	191.255		2.43575	0.745296
											2.43717	191.419		2.43708	0.743389
											2.4385	191.532		2.43842	0.741482
											2.43983	191.596		2.43975	0.740051
											2.44117	191.614		2.44108	0.738144
											2.4425	191.587		2.44242	0.736237
											2.44383	191.517		2.44375	0.733852
											2.44517	191.407		2.44508	0.730991
											2.4465	191.258		2.44642	0.727177
											2.44783	191.072		2.44775	0.723362
											2.44917	190.848		2.44908	0.719547
											2.4505	190.588		2.45042	0.715256
											2.45183	190.291		2.45175	0.711918
											2.45317	189.959		2.45308	0.710011
											2.4545	189.593		2.45442	0.709057
											2.45583	189.193		2.45575	0.708103
											2.45717	188.761		2.45708	0.70715
											2.4585	188.297		2.45842	0.705719
											2.45983	187.804		2.45975	0.705242
											2.46117	187.285		2.46108	0.703812
											2.4625	186.739		2.46242	0.702381
											2.46383	186.17		2.46375	0.700951
											2.46517	185.575		2.46508	0.700951
											2.4665	184.957		2.46642	0.701427
											2.46783	184.313		2.46775	0.701427
											2.46917	183.647		2.46908	0.701904
											2.4705	182.959		2.47042	0.701904
											2.47183	182.25		2.47175	0.701904
											2.47317	181.524		2.47308	0.700951
											2.4745	180.781		2.47442	0.699043
											2.47583	180.024		2.47575	0.696182
											2.47717	179.252		2.47708	0.693798
											2.4785	178.465		2.47842	0.691891
											2.47983	177.663		2.47975	0.69046
											2.48117	176.844		2.48108	0.689507
											2.4825	176.011		2.48242	0.68903
											2.48383	175.166		2.48375	0.689507
											2.48517	174.31		2.48508	0.689507
											2.4865	173.443		2.48642	0.688553
											2.48783	172.566		2.48775	0.688076
											2.48917	171.68		2.48908	0.687599
											2.4905	170.784		2.49042	0.687122
											2.49183	169.876		2.49175	0.686169
											2.49317	168.958		2.49308	0.685692
											2.4945	168.032		2.49442	0.685215
											2.49583	167.099		2.49575	0.686169
											2.49717	166.159		2.49708	0.687599
											2.4985	165.215		2.49842	0.688553
											2.49983	164.266		2.49975	0.689507
											2.50117	163.31		2.50108	0.69046
											2.5025	162.347		2.50242	0.691414
											2.50383	161.379		2.50375	0.691891
											2.50517	160.406		2.50508	0.691414
											2.5065	159.43		2.50642	0.690937
											2.50783	158.455		2.50775	0.69046
											2.50917	157.481		2.50908	0.690937
											2.5105	156.508		2.51042	0.690937
											2.51183	155.535		2.51175	0.690937
											2.51317	154.56		2.51308	0.691891
											2.5145	153.581		2.51442	0.692368
											2.51583	152.599		2.51575	0.692844
											2.51717	151.614		2.51708	0.693321
											2.5185	150.627		2.51842	0.695229
											2.51983	149.64		2.51975	0.697136
											2.52117	148.654		2.52108	0.69952
											2.5225	147.669		2.52242	0.701427
											2.52383	146.687		2.52375	0.702858
											2.52517	145.704		2.52508	0.704288
											2.5265	144.72		2.52642	0.703812
											2.52783	143.736		2.52775	0.701904
											2.52917	142.753		2.52908	0.699043
											2.5305	141.773		2.53042	0.697613
											2.53183	140.798		2.53175	0.69809
											2.53317	139.826		2.53308	0.699997
											2.5345	138.859		2.53442	0.703812
											2.53583	137.895		2.53575	0.708103
											2.53717	136.931		2.53708	0.712395
											2.5385	135.967		2.53842	0.716209
											2.53983	135.002		2.53975	0.718594
											2.54117	134.039		2.54108	0.71907
											2.5425	133.079		2.54242	0.718594
											2.54383	132.122		2.54375	0.71764
											2.54517	131.17		2.54508	0.71764
											2.5465	130.222		2.54642	0.71764
											2.54783	129.277		2.54775	0.71764
											2.54917	128.334		2.54908	0.718594
											2.5505	127.394		2.55042	0.720024
											2.55183	126.457		2.55175	0.721931
											2.55317	125.527		2.55308	0.723839
											2.5545	124.602		2.55442	0.725746
											2.55583	123.683		2.55575	0.727654
											2.55717	122.768		2.55708	0.729084
											2.5585	121.859		2.55842	0.730038
											2.55983	120.952		2.55975	0.729561
											2.56117	120.046		2.56108	0.728607
											2.5625	119.142		2.56242	0.727654
											2.56383	118.243		2.56375	0.727654
											2.56517	117.346		2.56508	0.72813
											2.5665	116.453		2.56642	0.728607
											2.56783	115.565		2.56775	0.729561
											2.56917	114.68		2.56908	0.730991
											2.5705	113.798		2.57042	0.732422
											2.57183	112.916		2.57175	0.732899
											2.57317	112.036		2.57308	0.732422
											2.5745	111.159		2.57442	0.730515
											2.57583	110.285		2.57575	0.727177
											2.57717	109.415		2.57708	0.724316
											2.5785	108.55		2.57842	0.721931
											2.57983	107.688		2.57975	0.718594
											2.58117	106.83		2.58108	0.714779
											2.5825	105.973		2.58242	0.710487
											2.58383	105.116		2.58375	0.705242
											2.58517	104.259		2.58508	0.699043
											2.5865	103.404		2.58642	0.691414
											2.58783	102.553		2.58775	0.682354
											2.58917	101.706		2.58908	0.672817
											2.5905	100.864		2.59042	0.661373
											2.59183	100.026		2.59175	0.648022
											2.59317	99.1898		2.59308	0.631809
											2.5945	98.3543		2.59442	0.613213
											2.59583	97.5184		2.59575	0.591278
											2.59717	96.6821		2.59708	0.567436
											2.5985	95.8466		2.59842	0.54121
											2.59983	95.0131		2.59975	0.513554
											2.60117	94.1815		2.60108	0.482559
											2.6025	93.3514		2.60242	0.449181
											2.60383	92.5221		2.60375	0.411034
											2.60517	91.6915		2.60508	0.368118
											2.6065	90.8589		2.60642	0.319481
											2.60783	90.0245		2.60775	0.266075
											2.60917	89.19		2.60908	0.206947
											2.6105	88.3579		2.61042	0.141144
											2.61183	87.5277		2.61175	0.069141
											2.61317	86.6995		2.61308	-0.00858
											2.6145	85.8722		2.61442	-0.09394
											2.61583	85.0444		2.61575	-0.18692
											2.61717	84.2142		2.61708	-0.28801
											2.6185	83.3807		2.61842	-0.39577
											2.61983	82.5453		2.61975	-0.51165
											2.62117	81.7108		2.62108	-0.63562
											2.6225	80.8783		2.62242	-0.76771
											2.62383	80.0486		2.62375	-0.90981
											2.62517	79.2203		2.62508	-1.06287
											2.6265	78.393		2.62642	-1.22643
											2.62783	77.5657		2.62775	-1.40142
											2.62917	76.7384		2.62908	-1.5893
											2.6305	75.9111		2.63042	-1.79005
											2.63183	75.0861		2.63175	-2.00367
											2.63317	74.2655		2.63308	-2.22969
											2.6345	73.4525		2.63442	-2.46906
											2.63583	72.6466		2.63575	-2.72322
											2.63717	71.8479		2.63708	-2.99215
											2.6385	71.0549		2.63842	-3.27396
											2.63983	70.2662		2.63975	-3.56865
											2.64117	69.4833		2.64108	-3.87764
											2.6425	68.7079		2.64242	-4.20141
											2.64383	67.9426		2.64375	-4.53758
											2.64517	67.1897		2.64508	-4.88472
											2.6465	66.4506		2.64642	-5.24235
											2.64783	65.7263		2.64775	-5.61047
											2.64917	65.0172		2.64908	-5.98717
											2.6505	64.322		2.65042	-6.37102
											2.65183	63.6392		2.65175	-6.76155
											2.65317	62.9702		2.65308	-7.15876
											2.6545	62.3164		2.65442	-7.56073
											2.65583	61.6803		2.65575	-7.96652
											2.65717	61.0638		2.65708	-8.37421
											2.6585	60.4677		2.65842	-8.78143
											2.65983	59.8922		2.65975	-9.18436
											2.66117	59.3381		2.66108	-9.57775
											2.6625	58.804		2.66242	-9.95731
											2.66383	58.2891		2.66375	-10.3164
[truncated: 1,002 more rows]
