# Supplementary material for: Structural features of heteromeric channels composed of CALHM2 and CALHM4 paralogs
Source: eLife. 2024 Jun 18;13:RP96138. doi: 10.7554/eLife.96138 (PMC11186629; doi:10.7554/eLife.96138)
Supplement: Figure 2—figure supplement 1—source data 2. [file elife-96138-fig2-figsupp1-data2.xlsx]

## Sheet: Figure 2-figure supplement 1C
Time	Data	Fit
-60.0565	0.820206	0
-59.9565	0.822914	0
-59.8565	0.807793	0
-59.7565	0.811195	0
-59.6565	0.812897	0
-59.5565	0.799988	0
-59.4565	0.780449	0
-59.3565	0.781143	0
-59.2565	0.772133	0
-59.1565	0.785553	0
-59.0565	0.772133	0
-58.9565	0.772133	0
-58.8565	0.76873	0
-58.7565	0.757011	0
-58.6565	0.739182	0
-58.5565	0.736473	0
-58.4565	0.742584	0
-58.3565	0.744102	0
-58.2565	0.741386	0
-58.1565	0.739693	0
-58.0565	0.711334	0
-57.9565	0.717949	0
-57.8565	0.71524	0
-57.7565	0.713539	0
-57.6565	0.703522	0
-57.5565	0.704025	0
-57.4565	0.691803	0
-57.3565	0.698418	0
-57.2565	0.695709	0
-57.1565	0.699806	0
-57.0565	0.705727	0
-56.9565	0.698425	0
-56.8565	0.694008	0
-56.7565	0.68399	0
-56.6565	0.667862	0
-56.5565	0.671082	0
-56.4565	0.662758	0
-56.3565	0.664459	0
-56.2565	0.658348	0
-56.1565	0.660553	0
-56.0565	0.667862	0
-55.9565	0.672272	0
-55.8565	0.666664	0
-55.7565	0.667168	0
-55.6565	0.64254	0
-55.5565	0.636612	0
-55.4565	0.631508	0
-55.3565	0.641022	0
-55.2565	0.639824	0
-55.1565	0.635414	0
-55.0565	0.628105	0
-54.9565	0.604668	0
-54.8565	0.611977	0
-54.7565	0.605362	0
-54.6565	0.616386	0
-54.5565	0.601959	0
-54.4565	0.615883	0
-54.3565	0.598557	0
-54.2565	0.599754	0
-54.1565	0.605179	0
-54.0565	0.599754	0
-53.9565	0.601959	0
-53.8565	0.608574	0
-53.7565	0.58905	0
-53.6565	0.592445	0
-53.5565	0.589043	0
-53.4565	0.589737	0
-53.3565	0.597549	0
-53.2565	0.603477	0
-53.1565	0.594147	0
-53.0565	0.604164	0
-52.9565	0.605865	0
-52.8565	0.604164	0
-52.7565	0.589043	0
-52.6565	0.597549	0
-52.5565	0.592445	0
-52.4565	0.594147	0
-52.3565	0.580727	0
-52.2565	0.592445	0
-52.1565	0.582428	0
-52.0565	0.582428	0
-51.9565	0.572914	0
-51.8565	0.562897	0
-51.7565	0.565102	0
-51.6565	0.558487	0
-51.5565	0.557793	0
-51.4565	0.550674	0
-51.3565	0.54557	0
-51.2565	0.546768	0
-51.1565	0.538269	0
-51.0565	0.522133	0
-50.9565	0.525032	0
-50.8565	0.54557	0
-50.7565	0.535049	0
-50.6565	0.533852	0
-50.5565	0.520439	0
-50.4565	0.526039	0
-50.3565	0.526039	0
-50.2565	0.522133	0
-50.1565	0.50872	0
-50.0565	0.502602	0
-49.9565	0.502602	0
-49.8565	0.48748	0
-49.7565	0.480865	0
-49.6565	0.494797	0
-49.5565	0.484772	0
-49.4565	0.475258	0
-49.3565	0.471352	0
-49.2565	0.481377	0
-49.1565	0.462349	0
-49.0565	0.45182	0
-48.9565	0.441803	0
-48.8565	0.46524	0
-48.7565	0.447227	0
-48.6565	0.444008	0
-48.5565	0.432289	0
-48.4565	0.445206	0
-48.3565	0.455223	0
-48.2565	0.455727	0
-48.1565	0.455727	0
-48.0565	0.448425	0
-47.9565	0.453522	0
-47.8565	0.455734	0
-47.7565	0.446716	0
-47.6565	0.441811	0
-47.5565	0.452515	0
-47.4565	0.450127	0
-47.3565	0.444016	0
-47.2565	0.43399	0
-47.1565	0.444008	0
-47.0565	0.432297	0
-46.9565	0.436707	0
-46.8565	0.43399	0
-46.7565	0.428894	0
-46.6565	0.429581	0
-46.5565	0.432289	0
-46.4565	0.432297	0
-46.3565	0.43399	0
-46.2565	0.428894	0
-46.1565	0.424477	0
-46.0565	0.422279	0
-45.9565	0.416664	0
-45.8565	0.417862	0
-45.7565	0.402748	0
-45.6565	0.406143	0
-45.5565	0.399849	0
-45.4565	0.406143	0
-45.3565	0.408852	0
-45.2565	0.410561	0
-45.1565	0.413956	0
-45.0565	0.402748	0
-44.9565	0.404953	0
-44.8565	0.406143	0
-44.7565	0.405457	0
-44.6565	0.398331	0
-44.5565	0.38932	0
-44.4565	0.394936	0
-44.3565	0.404953	0
-44.2565	0.398331	0
-44.1565	0.397644	0
-44.0565	0.398331	0
-43.9565	0.402748	0
-43.8565	0.404953	0
-43.7565	0.393227	0
-43.6565	0.391029	0
-43.5565	0.393227	0
-43.4565	0.386612	0
-43.3565	0.394936	0
-43.2565	0.386612	0
-43.1565	0.378799	0
-43.0565	0.386612	0
-42.9565	0.398331	0
-42.8565	0.398331	0
-42.7565	0.395943	0
-42.6565	0.379311	0
-42.5565	0.387115	0
-42.4565	0.377098	0
-42.3565	0.371498	0
-42.2565	0.374893	0
-42.1565	0.3703	0
-42.0565	0.361984	0
-41.9565	0.355362	0
-41.8565	0.351967	0
-41.7565	0.344147	0
-41.6565	0.341255	0
-41.5565	0.312904	0
-41.4565	0.308487	0
-41.3565	0.318504	0
-41.2565	0.312904	0
-41.1565	0.308487	0
-41.0565	0.321396	0
-40.9565	0.334633	0
-40.8565	0.327332	0
-40.7565	0.308487	0
-40.6565	0.319519	0
-40.5565	0.291672	0
-40.4565	0.285049	0
-40.3565	0.293373	0
-40.2565	0.283852	0
-40.1565	0.288956	0
-40.0565	0.293373	0
-39.9565	0.288956	0
-39.8565	0.288956	0
-39.7565	0.303391	0
-39.6565	0.301178	0
-39.5565	0.308487	0
-39.4565	0.295578	0
-39.3565	0.296768	0
-39.2565	0.316299	0
-39.1565	0.316811	0
-39.0565	0.303391	0
-38.9565	0.298973	0
-38.8565	0.301186	0
-38.7565	0.291672	0
-38.6565	0.296768	0
-38.5565	0.301186	0
-38.4565	0.296768	0
-38.3565	0.312904	0
-38.2565	0.323601	0
-38.1565	0.322922	0
-38.0565	0.325813	0
-37.9565	0.338036	0
-37.8565	0.329033	0
-37.7565	0.339737	0
-37.6565	0.340752	0
-37.5565	0.320717	0
-37.4565	0.340927	0
-37.3565	0.359268	0
-37.2565	0.350266	0
-37.1565	0.344154	0
-37.0565	0.346359	0
-36.9565	0.344154	0
-36.8565	0.338036	0
-36.7565	0.344147	0
-36.6565	0.335831	0
-36.5565	0.351967	0
-36.4565	0.362663	0
-36.3565	0.369797	0
-36.2565	0.351967	0
-36.1565	0.361984	0
-36.0565	0.351967	0
-35.9565	0.342445	0
-35.8565	0.332436	0
-35.7565	0.342453	0
-35.6565	0.339737	0
-35.5565	0.330727	0
-35.4565	0.332436	0
-35.3565	0.334641	0
-35.2565	0.320717	0
-35.1565	0.314598	0
-35.0565	0.318001	0
-34.9565	0.3078	0
-34.8565	0.305092	0
-34.7565	0.305595	0
-34.6565	0.296082	0
-34.5565	0.289467	0
-34.4565	0.288956	0
-34.3565	0.285561	0
-34.2565	0.282158	0
-34.1565	0.294563	0
-34.0565	0.295578	0
-33.9565	0.285049	0
-33.8565	0.293373	0
-33.7565	0.296768	0
-33.6565	0.308487	0
-33.5565	0.311203	0
-33.4565	0.299988	0
-33.3565	0.308487	0
-33.2565	0.290977	0
-33.1565	0.282333	0
-33.0565	0.305092	0
-32.9565	0.295578	0
-32.8565	0.288956	0
-32.7565	0.283859	0
-32.6565	0.285049	0
-32.5565	0.296082	0
-32.4565	0.290146	0
-32.3565	0.292175	0
-32.2565	0.287254	0
-32.1565	0.289467	0
-32.0565	0.285561	0
-31.9565	0.287254	0
-31.8565	0.286751	0
-31.7565	0.303391	0
-31.6565	0.308487	0
-31.5565	0.303391	0
-31.4565	0.293373	0
-31.3565	0.298973	0
-31.2565	0.294563	0
-31.1565	0.299988	0
-31.0565	0.288956	0
-30.9565	0.280457	0
-30.8565	0.287254	0
-30.7565	0.286751	0
-30.6565	0.283859	0
-30.5565	0.288956	0
-30.4565	0.303391	0
-30.3565	0.281654	0
-30.2565	0.296768	0
-30.1565	0.295578	0
-30.0565	0.29847	0
-29.9565	0.293877	0
-29.8565	0.306282	0
-29.7565	0.303894	0
-29.6565	0.287254	0
-29.5565	0.301186	0
-29.4565	0.285049	0
-29.3565	0.278755	0
-29.2565	0.286751	0
-29.1565	0.285049	0
-29.0565	0.291672	0
-28.9565	0.293365	0
-28.8565	0.296768	0
-28.7565	0.295578	0
-28.6565	0.285049	0
-28.5565	0.304581	0
-28.4565	0.301186	0
-28.3565	0.292175	0
-28.2565	0.280632	0
-28.1565	0.288269	0
-28.0565	0.272133	0
-27.9565	0.275032	0
-27.8565	0.276047	0
-27.7565	0.280457	0
-27.6565	0.277237	0
-27.5565	0.272141	0
-27.4565	0.268738	0
-27.3565	0.257706	0
-27.2565	0.249207	0
-27.1565	0.251083	0
-27.0565	0.252602	0
-26.9565	0.249893	0
-26.8565	0.257706	0
-26.7565	0.254311	0
-26.6565	0.252602	0
-26.5565	0.249893	0
-26.4565	0.264328	0
-26.3565	0.260422	0
-26.2565	0.259407	0
-26.1565	0.27282	0
-26.0565	0.268738	0
-25.9565	0.273842	0
-25.8565	0.264328	0
-25.7565	0.26432	0
-25.6565	0.271126	0
-25.5565	0.267723	0
-25.4565	0.250404	0
-25.3565	0.268921	0
-25.2565	0.268738	0
-25.1565	0.262123	0
-25.0565	0.256004	0
-24.9565	0.255501	0
-24.8565	0.260925	0
-24.7565	0.265007	0
-24.6565	0.257019	0
-24.5565	0.257706	0
-24.4565	0.269424	0
-24.3565	0.252602	0
-24.2565	0.255501	0
-24.1565	0.249207	0
-24.0565	0.244789	0
-23.9565	0.248192	0
-23.8565	0.255501	0
-23.7565	0.237488	0
-23.6565	0.23307	0
-23.5565	0.228157	0
-23.4565	0.225258	0
-23.3565	0.230362	0
-23.2565	0.221352	0
-23.1565	0.226456	0
-23.0565	0.234772	0
-22.9565	0.233078	0
-22.8565	0.225258	0
-22.7565	0.216438	0
-22.6565	0.225258	0
-22.5565	0.221359	0
-22.4565	0.218643	0
-22.3565	0.226456	0
-22.2565	0.221352	0
-22.1565	0.228157	0
-22.0565	0.221352	0
-21.9565	0.210136	0
-21.8565	0.20182	0
-21.7565	0.183487	0
-21.6565	0.195206	0
-21.5565	0.199615	0
-21.4565	0.199112	0
-21.3565	0.206924	0
-21.2565	0.21524	0
-21.1565	0.216942	0
-21.0565	0.21524	0
-20.9565	0.206924	0
-20.8565	0.218643	0
-20.7565	0.207428	0
-20.6565	0.194008	0
-20.5565	0.197411	0
-20.4565	0.195206	0
-20.3565	0.199615	0
-20.2565	0.194008	0
-20.1565	0.180084	0
-20.0565	0.162758	0
-19.9565	0.156143	0
-19.8565	0.16906	0
-19.7565	0.18399	0
-19.6565	0.186195	0
-19.5565	0.162758	0
-19.4565	0.167862	0
-19.3565	0.175674	0
-19.2565	0.170578	0
-19.1565	0.160561	0
-19.0565	0.156143	0
-18.9565	0.167862	0
-18.8565	0.163956	0
-18.7565	0.174484	0
-18.6565	0.177376	0
-18.5565	0.174484	0
-18.4565	0.172279	0
-18.3565	0.170067	0
-18.2565	0.172279	0
-18.1565	0.162758	0
-18.0565	0.158859	0
-17.9565	0.152748	0
-17.8565	0.157845	0
-17.7565	0.149849	0
-17.6565	0.128799	0
-17.5565	0.148331	0
-17.4565	0.141022	0
-17.3565	0.135422	0
-17.2565	0.143227	0
-17.1565	0.144936	0
-17.0565	0.131516	0
-16.9565	0.138313	0
-16.8565	0.130318	0
-16.7565	0.113686	0
-16.6565	0.117081	0
-16.5565	0.1203	0
-16.4565	0.116066	0
-16.3565	0.134407	0
-16.2565	0.148331	0
-16.1565	0.160049	0
-16.0565	0.145943	0
-15.9565	0.136612	0
-15.8565	0.150032	0
-15.7565	0.146629	0
-15.6565	0.15274	0
-15.5565	0.15274	0
-15.4565	0.150536	0
-15.3565	0.133209	0
-15.2565	0.148331	0
-15.1565	0.148331	0
-15.0565	0.13932	0
-14.9565	0.144424	0
-14.8565	0.143227	0
-14.7565	0.157845	0
-14.6565	0.151039	0
-14.5565	0.15274	0
-14.4565	0.146629	0
-14.3565	0.157845	0
-14.2565	0.151039	0
-14.1565	0.156143	0
-14.0565	0.164459	0
-13.9565	0.171265	0
-13.8565	0.174477	0
-13.7565	0.172272	0
-13.6565	0.179581	0
-13.5565	0.167175	0
-13.4565	0.171265	0
-13.3565	0.176178	0
-13.2565	0.162758	0
-13.1565	0.167862	0
-13.0565	0.160553	0
-12.9565	0.163452	0
-12.8565	0.17057	0
-12.7565	0.165657	0
-12.6565	0.162758	0
-12.5565	0.167862	0
-12.4565	0.157845	0
-12.3565	0.171768	0
-12.2565	0.177879	0
-12.1565	0.179581	0
-12.0565	0.172272	0
-11.9565	0.174477	0
-11.8565	0.164459	0
-11.7565	0.163452	0
-11.6565	0.17057	0
-11.5565	0.165657	0
-11.4565	0.154945	0
-11.3565	0.160049	0
-11.2565	0.159363	0
-11.1565	0.151733	0
-11.0565	0.156143	0
-10.9565	0.164459	0
-10.8565	0.143227	0
-10.7565	0.147827	0
-10.6565	0.169563	0
-10.5565	0.162758	0
-10.4565	0.15274	0
-10.3565	0.154945	0
-10.2565	0.144424	0
-10.1565	0.157845	0
-10.0565	0.147133	0
-9.95647	0.151733	0
-9.85648	0.151039	0
-9.75647	0.141022	0
-9.65647	0.148331	0
-9.55647	0.148331	0
-9.45647	0.148331	0
-9.35648	0.143227	0
-9.25647	0.148331	0
-9.15647	0.148331	0
-9.05647	0.141022	0
-8.95647	0.135414	0
-8.85648	0.133904	0
-8.75647	0.131508	0
-8.65647	0.133209	0
-8.55647	0.128113	0
-8.45647	0.120483	0
-8.35648	0.119789	0
-8.25647	0.113678	0
-8.15647	0.117081	0
-8.05647	0.117081	0
-7.95647	0.129997	0
-7.85648	0.127098	0
-7.75647	0.106369	0
-7.65647	0.089737	0
-7.55647	0.104164	0
-7.45647	0.101547	0
-7.35648	0.040291	0
-7.25647	0.040566	0
-7.15647	-0.15052	0
-7.05647	-0.26509	0
-6.95647	-0.31113	0
-6.85648	-0.37667	0
-6.75647	-0.44859	0
-6.65647	-0.62135	0
-6.55647	-0.70135	0
-6.45647	-0.61082	0
-6.35648	-0.46417	0
-6.25647	-0.44418	0
-6.15647	-0.58279	0
-6.05647	-0.50677	0
-5.95647	-0.53986	0
-5.85648	-0.53306	0
-5.75647	-0.5047	0
-5.65647	-0.53545	0
-5.55647	-0.56702	0
-5.45647	-0.56261	0
-5.35648	-0.55631	0
-5.25647	-0.54427	0
-5.15647	-0.56431	0
-5.05647	-0.5667	0
-4.95647	-0.58604	0
-4.85648	-0.60236	0
-4.75647	-0.62699	0
-4.65647	-0.65245	0
-4.55647	-0.63342	0
-4.45647	-0.59013	0
-4.35648	-0.59454	0
-4.25647	-0.59896	0
-4.15647	-0.60387	0
-4.05647	-0.57552	0
-3.95647	-0.58724	0
-3.85648	-0.58434	0
-3.75647	-0.56702	0
-3.65647	-0.54817	0
-3.55647	-0.55498	0
-3.45647	-0.57961	0
-3.35648	-0.59506	0
-3.25647	-0.58724	0
-3.15647	-0.59795	0
-3.05647	-0.62309	0
-2.95647	-0.64394	0
-2.85648	-0.5809	0
-2.75647	-0.48187	0
-2.65647	-0.35925	0
-2.55647	-0.28264	0
-2.45647	-0.16408	0
-2.35648	-0.05048	0
-2.25647	0.059403	0
-2.15647	0.128204	0
-2.05647	0.246719	0
-1.95647	0.288269	0
-1.85648	0.218597	0
-1.75647	0.111107	0
-1.65647	0.045525	0
-1.55647	0.038315	0
-1.45647	-0.02676	0
-1.35648	-0.19036	0
-1.25647	-0.25526	0
-1.15647	-0.50309	0
-1.05647	-0.77033	0
-0.95647	-0.73053	0
-0.85648	-0.61927	0
-0.75647	-0.52391	0
-0.65647	-0.5224	0
-0.55647	-0.49239	0
-0.45647	-0.48765	0
-0.35648	-0.48476	0
-0.25647	-0.5053	0
-0.15647	-0.4854	0
-0.05647	-0.52354	0
0.043526	-0.45976	-0.1759
0.143524	-0.24744	-0.17253
0.24353	-0.18559	-0.16916
0.343529	-0.09795	-0.16579
0.443527	-0.00907	-0.16243
0.543526	0.100174	-0.15908
0.643524	0.169792	-0.15572
0.74353	0.17894	-0.15237
0.843529	0.210373	-0.14903
0.943527	0.246033	-0.14569
1.04353	0.236847	-0.14236
1.14352	0.225815	-0.13902
1.24353	0.240753	-0.1357
1.34353	0.266891	-0.13237
1.44353	0.275406	-0.12905
1.54353	0.274025	-0.12574
1.64352	0.242775	-0.12243
1.74353	0.22683	-0.11912
1.84353	0.247368	-0.11582
1.94353	0.224434	-0.11252
2.04353	0.211014	-0.10923
2.14352	0.235641	-0.10594
2.24353	0.238174	-0.10265
2.34353	0.223236	-0.09937
2.44353	0.220528	-0.09609
2.54353	0.219833	-0.09282
2.64352	0.243965	-0.08955
2.74353	0.248886	-0.08629
2.84353	0.245987	-0.08303
2.94353	0.23156	-0.07977
3.04353	0.231552	-0.07652
3.14352	0.225258	-0.07327
3.24353	0.215431	-0.07002
3.34353	0.231552	-0.06678
3.44353	0.256516	-0.06354
3.54353	0.234962	-0.06031
3.64352	0.262802	-0.05708
3.74353	0.277924	-0.05386
3.84353	0.305275	-0.05064
3.94353	0.330727	-0.04742
4.04353	0.34433	-0.04421
4.14352	0.351967	-0.041
4.24353	0.350952	-0.0378
4.34353	0.363686	-0.0346
4.44353	0.349434	-0.0314
4.54353	0.373695	-0.02821
4.64352	0.367767	-0.02502
4.74353	0.378296	-0.02184
4.84353	0.368782	-0.01866
4.94353	0.363861	-0.01548
5.04353	0.382202	-0.01231
5.14352	0.37149	-0.00914
5.24353	0.391716	-0.00598
5.34353	0.388123	-0.00282
5.44353	0.379997	0.00034
5.54353	0.378799	0.00349
5.64352	0.374893	0.00664
5.74353	0.391716	0.00978
5.84353	0.393921	0.012925
5.94353	0.389832	0.016062
6.04353	0.391716	0.019194
6.14352	0.385422	0.022323
6.24353	0.373695	0.025448
6.34353	0.355362	0.028568
6.44353	0.355362	0.031685
6.54353	0.360466	0.034798
6.64352	0.342445	0.037907
6.74353	0.348747	0.041012
6.84353	0.359268	0.044113
6.94353	0.363861	0.047211
7.04353	0.386612	0.050304
7.14352	0.380501	0.053394
7.24353	0.38372	0.056479
7.34353	0.37999	0.059561
7.44353	0.386612	0.062639
7.54353	0.391708	0.065713
7.64352	0.398331	0.068783
7.74353	0.406654	0.07185
7.84353	0.420753	0.074912
7.94353	0.426186	0.077971
8.04353	0.412766	0.081026
8.14352	0.413445	0.084077
8.24353	0.435875	0.087124
8.34353	0.444016	0.090167
8.44353	0.44249	0.093207
8.54353	0.449112	0.096243
8.64352	0.46032	0.099274
8.74353	0.464737	0.102303
8.84353	0.464737	0.105327
8.94353	0.464737	0.108347
9.04353	0.473053	0.111364
9.14352	0.472038	0.114377
9.24353	0.469658	0.117386
9.34353	0.472038	0.120391
9.44353	0.476456	0.123393
9.54353	0.476456	0.126391
9.64352	0.476456	0.129385
9.74353	0.486473	0.132375
9.84353	0.497177	0.135362
9.94353	0.499207	0.138344
10.0435	0.501091	0.141324
10.1435	0.507706	0.144299
10.2435	0.502602	0.147271
10.3435	0.503799	0.150238
10.4435	0.527237	0.153202
10.5435	0.527237	0.156163
10.6435	0.527237	0.159119
10.7435	0.551872	0.162073
10.8435	0.546768	0.165022
10.9435	0.553383	0.167967
11.0435	0.546768	0.170909
11.1435	0.560188	0.173847
11.2435	0.553383	0.176782
11.3435	0.54557	0.179713
11.4435	0.554077	0.18264
11.5435	0.556282	0.185563
11.6435	0.558487	0.188483
11.7435	0.561195	0.191399
11.8435	0.558487	0.194312
11.9435	0.558487	0.19722
12.0435	0.569702	0.200125
12.1435	0.566299	0.203027
12.2435	0.575813	0.205925
12.3435	0.576317	0.208819
12.4435	0.582428	0.21171
12.5435	0.583122	0.214596
12.6435	0.580727	0.21748
12.7435	0.590935	0.22036
12.8435	0.604164	0.223236
12.9435	0.602654	0.226108
13.0435	0.607567	0.228977
13.1435	0.601967	0.231842
13.2435	0.599251	0.234704
13.3435	0.599068	0.237562
13.4435	0.597549	0.240417
13.5435	0.597549	0.243267
13.6435	0.597549	0.246115
13.7435	0.609268	0.248959
13.8435	0.592445	0.251799
13.9435	0.585831	0.254635
14.0435	0.610466	0.257468
14.1435	0.617081	0.260298
14.2435	0.620483	0.263124
14.3435	0.636612	0.265946
14.4435	0.649529	0.268765
14.5435	0.657845	0.271581
14.6435	0.654945	0.274392
14.7435	0.638817	0.277201
14.8435	0.63932	0.280005
14.9435	0.634911	0.282807
15.0435	0.640518	0.285604
15.1435	0.632202	0.288398
15.2435	0.635918	0.291189
15.3435	0.628799	0.293976
15.4435	0.636612	0.29676
15.5435	0.636612	0.29954
15.6435	0.640518	0.302317
15.7435	0.643227	0.30509
15.8435	0.636612	0.30786
15.9435	0.649529	0.310626
16.0435	0.662758	0.313389
16.1435	0.656143	0.316148
16.2435	0.667862	0.318904
16.3435	0.680779	0.321657
16.4435	0.687393	0.324405
16.5435	0.687393	0.327151
16.6435	0.699112	0.329893
16.7435	0.70182	0.332632
16.8435	0.687393	0.335367
16.9435	0.692497	0.338098
17.0435	0.706924	0.340827
17.1435	0.690613	0.343552
17.2435	0.692497	0.346273
17.3435	0.699112	0.348991
17.4435	0.697914	0.351706
17.5435	0.682289	0.354417
17.6435	0.687393	0.357125
17.7435	0.682289	0.359829
17.8435	0.677376	0.36253
17.9435	0.686378	0.365228
18.0435	0.705223	0.367922
18.1435	0.709129	0.370613
18.2435	0.706924	0.373301
18.3435	0.703522	0.375985
18.4435	0.704216	0.378665
18.5435	0.705727	0.381343
18.6435	0.706924	0.384017
18.7435	0.704216	0.386687
18.8435	0.720848	0.389355
18.9435	0.711342	0.392019
19.0435	0.709129	0.394679
19.1435	0.714737	0.397336
19.2435	0.711334	0.399991
19.3435	0.709633	0.402641
19.4435	0.696907	0.405288
19.5435	0.709129	0.407932
19.6435	0.712029	0.410573
19.7435	0.718643	0.41321
19.8435	0.70182	0.415844
19.9435	0.699615	0.418475
20.0435	0.699112	0.421102
20.1435	0.706924	0.423726
20.2435	0.706924	0.426347
20.3435	0.695709	0.428965
20.4435	0.714233	0.431579
20.5435	0.706924	0.43419
20.6435	0.706924	0.436798
20.7435	0.723747	0.439402
20.8435	0.73307	0.442003
20.9435	0.718643	0.444601
21.0435	0.718643	0.447196
21.1435	0.734962	0.449787
21.2435	0.740883	0.452375
21.3435	0.734772	0.45496
21.4435	0.738174	0.457542
21.5435	0.73307	0.46012
21.6435	0.745987	0.462695
21.7435	0.751091	0.465267
21.8435	0.762115	0.467836
21.9435	0.764511	0.470401
22.0435	0.788956	0.472963
22.1435	0.793365	0.475522
22.2435	0.777237	0.478078
22.3435	0.772133	0.480631
22.4435	0.773834	0.48318
22.5435	0.781143	0.485726
22.6435	0.783852	0.488269
22.7435	0.778938	0.490809
22.8435	0.783852	0.493346
22.9435	0.779442	0.495879
23.0435	0.786751	0.498409
23.1435	0.787254	0.500936
23.2435	0.776543	0.50346
23.3435	0.763313	0.505981
23.4435	0.781143	0.508499
23.5435	0.76432	0.511013
23.6435	0.766022	0.513524
23.7435	0.772827	0.516032
23.8435	0.781143	0.518537
23.9435	0.768738	0.521039
24.0435	0.74939	0.523538
24.1435	0.762115	0.526033
24.2435	0.772827	0.528526
24.3435	0.785049	0.531015
24.4435	0.785049	0.533501
24.5435	0.777237	0.535984
24.6435	0.770439	0.538464
24.7435	0.767723	0.540941
24.8435	0.762115	0.543414
24.9435	0.757706	0.545885
25.0435	0.763817	0.548352
25.1435	0.770622	0.550817
25.2435	0.785049	0.553278
25.3435	0.785049	0.555736
25.4435	0.788956	0.558191
25.5435	0.785049	0.560643
25.6435	0.801872	0.563092
25.7435	0.808487	0.565538
25.8435	0.811195	0.567981
25.9435	0.813591	0.570421
26.0435	0.812897	0.572857
26.1435	0.806786	0.575291
26.2435	0.805084	0.577722
26.3435	0.805779	0.580149
26.4435	0.818504	0.582573
26.5435	0.818001	0.584995
26.6435	0.815102	0.587413
26.7435	0.808487	0.589829
26.8435	0.806786	0.592241
26.9435	0.806282	0.59465
27.0435	0.820206	0.597056
27.1435	0.820206	0.59946
27.2435	0.820206	0.60186
27.3435	0.828018	0.604257
27.4435	0.822914	0.606651
27.5435	0.821404	0.609042
27.6435	0.823608	0.611431
27.7435	0.840935	0.613816
27.8435	0.842445	0.616198
27.9435	0.844841	0.618577
28.0435	0.844147	0.620953
28.1435	0.834633	0.623327
28.2435	0.848244	0.625697
28.3435	0.854164	0.628064
28.4435	0.83905	0.630429
28.5435	0.833122	0.63279
28.6435	0.836334	0.635148
28.7435	0.830223	0.637504
28.8435	0.835831	0.639856
28.9435	0.840935	0.642206
29.0435	0.847549	0.644552
29.1435	0.847549	0.646896
29.2435	0.854164	0.649237
29.3435	0.859268	0.651574
29.4435	0.854164	0.653909
29.5435	0.843643	0.656241
29.6435	0.857063	0.65857
29.7435	0.854164	0.660896
29.8435	0.850258	0.663219
29.9435	0.843643	0.665539
30.0435	0.840935	0.667856
30.1435	0.842445	0.670171
30.2435	0.848747	0.672482
30.3435	0.859268	0.674791
30.4435	0.851959	0.677096
30.5435	0.847549	0.679399
30.6435	0.865883	0.681699
30.7435	0.847549	0.683996
30.8435	0.855362	0.68629
30.9435	0.867081	0.688581
31.0435	0.861977	0.69087
31.1435	0.867081	0.693155
31.2435	0.868782	0.695438
31.3435	0.873695	0.697718
31.4435	0.855362	0.699994
31.5435	0.872185	0.702268
31.6435	0.885414	0.70454
31.7435	0.872185	0.706808
31.8435	0.890518	0.709073
31.9435	0.885414	0.711336
32.0435	0.878799	0.713596
32.1435	0.891716	0.715853
32.2435	0.900536	0.718107
32.3435	0.906143	0.720358
32.4435	0.894424	0.722607
32.5435	0.894424	0.724852
32.6435	0.899529	0.727095
32.7435	0.904953	0.729335
32.8435	0.911247	0.731572
32.9435	0.906143	0.733807
33.0435	0.910049	0.736038
33.1435	0.912758	0.738267
33.2435	0.896126	0.740493
33.3435	0.88813	0.742716
33.4435	0.874893	0.744936
33.5435	0.874893	0.747154
33.6435	0.878799	0.749369
33.7435	0.886612	0.751581
33.8435	0.886612	0.75379
33.9435	0.899529	0.755997
34.0435	0.904945	0.7582
34.1435	0.906143	0.760401
34.2435	0.891029	0.7626
34.3435	0.890015	0.764795
34.4435	0.891029	0.766988
34.5435	0.901726	0.769178
34.6435	0.911247	0.771365
34.7435	0.912758	0.773549
34.8435	0.894424	0.775731
34.9435	0.906143	0.77791
35.0435	0.906143	0.780086
35.1435	0.906143	0.782259
35.2435	0.910553	0.78443
35.3435	0.898331	0.786598
35.4435	0.904945	0.788764
35.5435	0.894424	0.790926
35.6435	0.903427	0.793086
35.7435	0.910049	0.795243
35.8435	0.916161	0.797398
35.9435	0.922272	0.799549
36.0435	0.913956	0.801698
36.1435	0.917862	0.803845
36.2435	0.914467	0.805989
36.3435	0.910049	0.808129
36.4435	0.921257	0.810268
36.5435	0.922966	0.812403
36.6435	0.937393	0.814536
36.7435	0.937393	0.816666
36.8435	0.949112	0.818794
36.9435	0.96032	0.820919
37.0435	0.95182	0.823041
37.1435	0.945206	0.825161
37.2435	0.953018	0.827278
37.3435	0.958122	0.829392
37.4435	0.973061	0.831503
37.5435	0.960831	0.833612
37.6435	0.962029	0.835719
37.7435	0.968643	0.837822
37.8435	0.980362	0.839923
37.9435	0.978661	0.842022
38.0435	0.980865	0.844117
38.1435	0.972038	0.84621
38.2435	0.995987	0.848301
38.3435	0.995987	0.850389
38.4435	0.990883	0.852474
38.5435	0.993782	0.854557
38.6435	0.999893	0.856637
38.7435	1.00771	0.858714
38.8435	1.00771	0.860789
38.9435	0.999893	0.862861
39.0435	1.00771	0.864931
39.1435	1.0026	0.866997
39.2435	0.995987	0.869062
39.3435	0.997688	0.871124
39.4435	1.00719	0.873183
39.5435	1.00771	0.87524
39.6435	1.01552	0.877293
39.7435	1.01942	0.879345
39.8435	1.02213	0.881394
39.9435	1.01942	0.88344
40.0435	1.02384	0.885484
40.1435	1.01942	0.887525
40.2435	1.02724	0.889564
40.3435	1.02554	0.8916
40.4435	1.02333	0.893633
40.5435	1.03505	0.895664
40.6435	1.03165	0.897693
40.7435	1.02213	0.899719
40.8435	1.02843	0.901742
40.9435	1.02724	0.903763
41.0435	1.01874	0.905781
41.1435	1.01942	0.907796
41.2435	1.00771	0.90981
41.3435	1.01212	0.91182
41.4435	1.01161	0.913828
41.5435	1.01772	0.915834
41.6435	1.01212	0.917837
41.7435	1.02282	0.919838
41.8435	1.01212	0.921836
41.9435	1.01552	0.923831
42.0435	1.02453	0.925824
42.1435	1.03114	0.927815
42.2435	1.03896	0.929803
42.3435	1.04897	0.931788
42.4435	1.03505	0.933771
42.5435	1.04677	0.935752
42.6435	1.04286	0.93773
42.7435	1.05849	0.939706
42.8435	1.05628	0.941679
42.9435	1.05338	0.943649
43.0435	1.05339	0.945618
43.1435	1.04677	0.947583
43.2435	1.05458	0.949547
43.3435	1.05118	0.951507
43.4435	1.0714	0.953466
43.5435	1.0685	0.955421
43.6435	1.0612	0.957375
43.7435	1.05458	0.959326
43.8435	1.05628	0.961274
43.9435	1.06511	0.96322
44.0435	1.04677	0.965164
44.1435	1.05458	0.967105
44.2435	1.06019	0.969044
44.3435	1.05407	0.97098
44.4435	1.0651	0.972914
44.5435	1.05458	0.974845
44.6435	1.0663	0.976774
44.7435	1.05849	0.978701
44.8435	1.0663	0.980625
44.9435	1.07802	0.982547
45.0435	1.08583	0.984466
45.1435	1.07462	0.986383
45.2435	1.07632	0.988298
45.3435	1.07411	0.99021
45.4435	1.07802	0.992119
45.5435	1.08753	0.994027
45.6435	1.07802	0.995932
45.7435	1.08974	0.997834
45.8435	1.09245	0.999734
45.9435	1.08244	1.00163
46.0435	1.0685	1.00353
46.1435	1.08244	1.00542
46.2435	1.08073	1.00731
46.3435	1.0663	1.0092
46.4435	1.0663	1.01109
46.5435	1.0663	1.01297
46.6435	1.07411	1.01485
46.7435	1.07802	1.01673
46.8435	1.06901	1.0186
46.9435	1.07072	1.02048
47.0435	1.0663	1.02235
47.1435	1.0663	1.02422
47.2435	1.07802	1.02609
47.3435	1.07802	1.02795
47.4435	1.09755	1.02981
47.5435	1.08905	1.03167
47.6435	1.07411	1.03353
47.7435	1.08974	1.03539
47.8435	1.09415	1.03724
47.9435	1.09636	1.03909
48.0435	1.07733	1.04094
48.1435	1.08974	1.04279
48.2435	1.07802	1.04463
48.3435	1.08583	1.04647
48.4435	1.09245	1.04831
48.5435	1.08583	1.05015
48.6435	1.09415	1.05198
48.7435	1.08634	1.05381
48.8435	1.08192	1.05564
48.9435	1.07632	1.05747
49.0435	1.07802	1.0593
49.1435	1.07462	1.06112
49.2435	1.0663	1.06294
49.3435	1.08804	1.06476
49.4435	1.08244	1.06657
49.5435	1.07292	1.06839
49.6435	1.07802	1.0702
49.7435	1.09093	1.07201
49.8435	1.09755	1.07382
49.9435	1.09755	1.07562
50.0435	1.10536	1.07742
50.1435	1.11266	1.07922
50.2435	1.12659	1.08102
50.3435	1.14561	1.08282
50.4435	1.14544	1.08461
50.5435	1.12659	1.0864
50.6435	1.13661	1.08819
50.7435	1.1271	1.08998
50.8435	1.12659	1.09176
50.9435	1.13542	1.09354
51.0435	1.13661	1.09532
51.1435	1.1288	1.0971
51.2435	1.12489	1.09888
51.3435	1.1339	1.10065
51.4435	1.14323	1.10242
51.5435	1.15343	1.10419
51.6435	1.14714	1.10596
51.7435	1.14001	1.10772
51.8435	1.15462	1.10948
51.9435	1.16005	1.11124
52.0435	1.15105	1.113
52.1435	1.15343	1.11476
52.2435	1.16277	1.11651
52.3435	1.15343	1.11826
52.4435	1.14323	1.12001
52.5435	1.14442	1.12176
52.6435	1.15173	1.1235
52.7435	1.14884	1.12524
52.8435	1.14171	1.12698
52.9435	1.15614	1.12872
53.0435	1.16344	1.13046
53.1435	1.16396	1.13219
53.2435	1.17738	1.13392
53.3435	1.17788	1.13565
53.4435	1.16786	1.13738
53.5435	1.16447	1.13911
53.6435	1.17126	1.14083
53.7435	1.17567	1.14255
53.8435	1.17228	1.14427
53.9435	1.17296	1.14598
54.0435	1.1896	1.1477
54.1435	1.184	1.14941
54.2435	1.16786	1.15112
54.3435	1.16344	1.15283
54.4435	1.18077	1.15453
54.5435	1.16786	1.15624
54.6435	1.17567	1.15794
54.7435	1.17958	1.15964
54.8435	1.17907	1.16133
54.9435	1.18909	1.16303
55.0435	1.1862	1.16472
55.1435	1.17567	1.16641
55.2435	1.18298	1.1681
55.3435	1.18349	1.16979
55.4435	1.18739	1.17147
55.5435	1.2003	1.17315
55.6435	1.19572	1.17483
55.7435	1.1896	1.17651
55.8435	1.19521	1.17819
55.9435	1.18009	1.17986
56.0435	1.17958	1.18153
56.1435	1.17908	1.1832
56.2435	1.19181	1.18487
56.3435	1.19079	1.18653
56.4435	1.20863	1.1882
56.5435	1.21083	1.18986
56.6435	1.21355	1.19152
56.7435	1.20251	1.19318
56.8435	1.21134	1.19483
56.9435	1.20183	1.19648
57.0435	1.20541	1.19813
57.1435	1.23036	1.19978
57.2435	1.21694	1.20143
57.3435	1.23427	1.20307
57.4435	1.23478	1.20472
57.5435	1.22646	1.20636
57.6435	1.21525	1.208
57.7435	1.21355	1.20963
57.8435	1.21694	1.21127
57.9435	1.21983	1.2129
58.0435	1.21644	1.21453
58.1435	1.22085	1.21616
58.2435	1.23156	1.21778
58.3435	1.23308	1.21941
58.4435	1.23478	1.22103
58.5435	1.22136	1.22265
58.6435	1.23155	1.22427
58.7435	1.2448	1.22588
58.8435	1.24599	1.2275
58.9435	1.2465	1.22911
59.0435	1.23969	1.23072
59.1435	1.23087	1.23233
59.2435	1.22204	1.23393
59.3435	1.24599	1.23554
59.4435	1.25108	1.23714
59.5435	1.25431	1.23874
59.6435	1.24751	1.24033
59.7435	1.23478	1.24193
59.8435	1.22985	1.24352
59.9435	1.23478	1.24512
60.0435	1.22646	1.24671
60.1435	1.23647	1.24829
60.2435	1.23936	1.24988
60.3435	1.2504	1.25146
60.4435	1.25329	1.25304
60.5435	1.2504	1.25462
60.6435	1.25261	1.2562
60.7435	1.24599	1.25778
60.8435	1.26552	1.25935
60.9435	1.25771	1.26092
61.0435	1.26212	1.26249
61.1435	1.25771	1.26406
61.2435	1.2611	1.26563
61.3435	1.26603	1.26719
61.4435	1.26093	1.26875
61.5435	1.26501	1.27031
61.6435	1.26722	1.27187
61.7435	1.26772	1.27343
61.8435	1.26552	1.27498
61.9435	1.26212	1.27653
62.0435	1.26772	1.27808
62.1435	1.26212	1.27963
62.2435	1.25771	1.28118
62.3435	1.26891	1.28272
62.4435	1.27825	1.28427
62.5435	1.27282	1.28581
62.6435	1.27214	1.28735
62.7435	1.27843	1.28888
62.8435	1.28896	1.29042
62.9435	1.27384	1.29195
63.0435	1.28896	1.29348
63.1435	1.28725	1.29501
63.2435	1.27384	1.29654
63.3435	1.28063	1.29806
63.4435	1.28233	1.29959
63.5435	1.29337	1.30111
63.6435	1.28896	1.30263
63.7435	1.29897	1.30414
63.8435	1.29847	1.30566
63.9435	1.3056	1.30717
64.0435	1.29456	1.30869
64.1435	1.30849	1.3102
64.2435	1.30849	1.3117
64.3435	1.29948	1.31321
64.4435	1.29337	1.31471
64.5435	1.29677	1.31622
64.6435	1.30067	1.31772
64.7435	1.29166	1.31922
64.8435	1.29015	1.32071
64.9435	1.30339	1.32221
65.0435	1.29015	1.3237
65.1435	1.30339	1.32519
65.2435	1.29847	1.32668
65.3435	1.29897	1.32817
65.4435	1.30458	1.32965
65.5435	1.30509	1.33114
65.6435	1.32021	1.33262
65.7435	1.3146	1.3341
65.8435	1.318	1.33558
65.9435	1.32021	1.33705
66.0435	1.31511	1.33853
66.1435	1.3163	1.34
66.2435	1.3129	1.34147
66.3435	1.30679	1.34294
66.4435	1.30119	1.34441
66.5435	1.31188	1.34587
66.6435	1.3078	1.34733
66.7435	1.30628	1.3488
66.8435	1.3073	1.35025
66.9435	1.30016	1.35171
67.0435	1.30119	1.35317
67.1435	1.30339	1.35462
67.2435	1.30186	1.35607
67.3435	1.30339	1.35753
67.4435	1.31019	1.35897
67.5435	1.30339	1.36042
67.6435	1.30849	1.36187
67.7435	1.30339	1.36331
67.8435	1.29337	1.36475
67.9435	1.29235	1.36619
68.0435	1.28827	1.36763
68.1435	1.28063	1.36906
68.2435	1.29847	1.3705
68.3435	1.28386	1.37193
68.4435	1.29235	1.37336
68.5435	1.30119	1.37479
68.6435	1.28896	1.37622
68.7435	1.29677	1.37764
68.8435	1.28896	1.37906
68.9435	1.29677	1.38049
69.0435	1.29677	1.38191
69.1435	1.29677	1.38332
69.2435	1.29167	1.38474
69.3435	1.29847	1.38615
69.4435	1.30067	1.38757
69.5435	1.30339	1.38898
69.6435	1.30067	1.39039
69.7435	1.29677	1.3918
69.8435	1.29677	1.3932
69.9435	1.28386	1.3946
70.0435	1.28505	1.39601
70.1435	1.27724	1.39741
70.2435	1.29337	1.39881
70.3435	1.28063	1.4002
70.4435	1.28675	1.4016
70.5435	1.29897	1.40299
70.6435	1.29337	1.40438
70.7435	1.28725	1.40577
70.8435	1.29456	1.40716
70.9435	1.29677	1.40855
71.0435	1.30187	1.40993
71.1435	1.31511	1.41131
71.2435	1.30849	1.41269
71.3435	1.3163	1.41407
71.4435	1.32021	1.41545
71.5435	1.3163	1.41683
71.6435	1.30849	1.4182
71.7435	1.30849	1.41957
71.8435	1.3163	1.42095
71.9435	1.31511	1.42231
72.0435	1.30849	1.42368
72.1435	1.30968	1.42505
72.2435	1.32291	1.42641
72.3435	1.32802	1.42777
72.4435	1.3163	1.42913
72.5435	1.32802	1.43049
72.6435	1.32581	1.43185
72.7435	1.33022	1.4332
72.8435	1.33244	1.43456
72.9435	1.32802	1.43591
73.0435	1.33413	1.43726
73.1435	1.33244	1.43861
73.2435	1.32972	1.43996
73.3435	1.33804	1.4413
73.4435	1.33244	1.44264
73.5435	1.33804	1.44399
73.6435	1.33753	1.44533
73.7435	1.33192	1.44666
73.8435	1.34313	1.448
73.9435	1.33905	1.44934
74.0435	1.33141	1.45067
74.1435	1.34534	1.452
74.2435	1.35094	1.45333
74.3435	1.35417	1.45466
74.4435	1.35197	1.45599
74.5435	1.34755	1.45731
74.6435	1.35417	1.45864
74.7435	1.34874	1.45996
74.8435	1.35927	1.46128
74.9435	1.36708	1.4626
75.0435	1.36708	1.46391
75.1435	1.35927	1.46523
75.2435	1.36198	1.46654
75.3435	1.36046	1.46785
75.4435	1.36369	1.46916
75.5435	1.35485	1.47047
75.6435	1.35858	1.47178
75.7435	1.35094	1.47308
75.8435	1.34364	1.47439
75.9435	1.36878	1.47569
76.0435	1.35417	1.47699
76.1435	1.34755	1.47829
76.2435	1.33905	1.47958
76.3435	1.34314	1.48088
76.4435	1.36047	1.48217
76.5435	1.35416	1.48347
76.6435	1.35197	1.48476
76.7435	1.35146	1.48605
76.8435	1.35587	1.48733
76.9435	1.33804	1.48862
77.0435	1.34364	1.4899
77.1435	1.34245	1.49118
77.2435	1.32581	1.49247
77.3435	1.33804	1.49374
77.4435	1.33753	1.49502
77.5435	1.34313	1.4963
77.6435	1.33244	1.49757
77.7435	1.33463	1.49885
77.8435	1.32802	1.50012
77.9435	1.32411	1.50139
78.0435	1.34093	1.50265
78.1435	1.34245	1.50392
78.2435	1.33244	1.50519
78.3435	1.34313	1.50645
78.4435	1.34755	1.50771
78.5435	1.33634	1.50897
78.6435	1.33804	1.51023
78.7435	1.33753	1.51149
78.8435	1.33413	1.51274
78.9435	1.34263	1.514
79.0435	1.34975	1.51525
79.1435	1.35197	1.5165
79.2435	1.33464	1.51775
79.3435	1.33583	1.519
79.4435	1.34755	1.52024
79.5435	1.34585	1.52149
79.6435	1.34534	1.52273
79.7435	1.35587	1.52397
79.8435	1.35807	1.52521
79.9435	1.35927	1.52645
80.0435	1.35876	1.52768
80.1435	1.37149	1.52892
80.2435	1.3788	1.53015
80.3435	1.36538	1.53138
80.4435	1.38169	1.53261
80.5435	1.3737	1.53384
80.6435	1.39001	1.53507
80.7435	1.39764	1.5363
80.8435	1.38831	1.53752
80.9435	1.38882	1.53874
81.0435	1.38219	1.53996
81.1435	1.39613	1.54118
81.2435	1.40665	1.5424
81.3435	1.38882	1.54362
81.4435	1.39833	1.54483
81.5435	1.39442	1.54605
81.6435	1.39833	1.54726
81.7435	1.39103	1.54847
81.8435	1.39663	1.54968
81.9435	1.40122	1.55089
82.0435	1.42007	1.55209
82.1435	1.41056	1.5533
82.2435	1.40835	1.5545
82.3435	1.40733	1.5557
82.4435	1.42228	1.5569
82.5435	1.41786	1.5581
82.6435	1.41786	1.5593
82.7435	1.41276	1.56049
82.8435	1.42296	1.56169
82.9435	1.42448	1.56288
83.0435	1.40665	1.56407
83.1435	1.39323	1.56526
83.2435	1.39833	1.56645
83.3435	1.39442	1.56763
83.4435	1.40614	1.56882
83.5435	1.41276	1.57
83.6435	1.39103	1.57118
83.7435	1.39052	1.57236
83.8435	1.38661	1.57354
83.9435	1.40343	1.57472
84.0435	1.40835	1.5759
84.1435	1.40784	1.57707
84.2435	1.40495	1.57824
84.3435	1.39833	1.57941
84.4435	1.39833	1.58058
84.5435	1.38491	1.58175
84.6435	1.38441	1.58292
84.7435	1.39833	1.58409
84.8435	1.38661	1.58525
84.9435	1.38712	1.58641
85.0435	1.38882	1.58757
85.1435	1.38831	1.58873
85.2435	1.38882	1.58989
85.3435	1.38661	1.59105
85.4435	1.38831	1.5922
85.5435	1.39663	1.59336
85.6435	1.38831	1.59451
85.7435	1.39663	1.59566
85.8435	1.39953	1.59681
85.9435	1.40155	1.59796
86.0435	1.40683	1.59911
86.1435	1.40936	1.60025
86.2435	1.40444	1.6014
86.3435	1.40784	1.60254
86.4435	1.40614	1.60368
86.5435	1.41277	1.60482
86.6435	1.41446	1.60596
86.7435	1.41005	1.60709
86.8435	1.41277	1.60823
86.9435	1.40275	1.60936
87.0435	1.39391	1.6105
87.1435	1.41786	1.61163
87.2435	1.40614	1.61276
87.3435	1.40614	1.61389
87.4435	1.40104	1.61501
87.5435	1.41905	1.61614
87.6435	1.41447	1.61726
87.7435	1.42788	1.61838
87.8435	1.42738	1.61951
87.9435	1.42516	1.62063
88.0435	1.44572	1.62174
88.1435	1.42788	1.62286
88.2435	1.43519	1.62398
88.3435	1.4362	1.62509
88.4435	1.4323	1.6262
88.5435	1.43519	1.62731
88.6435	1.44231	1.62842
88.7435	1.43519	1.62953
88.8435	1.434	1.63064
88.9435	1.42788	1.63175
89.0435	1.434	1.63285
89.1435	1.43298	1.63395
89.2435	1.43519	1.63506
89.3435	1.43891	1.63616
89.4435	1.42567	1.63725
89.5435	1.42567	1.63835
89.6435	1.42227	1.63945
89.7435	1.42958	1.64054
89.8435	1.42448	1.64164
89.9435	1.42567	1.64273
90.0435	1.43468	1.64382
90.1435	1.43569	1.64491
90.2435	1.43399	1.646
90.3435	1.43739	1.64708
90.4435	1.4323	1.64817
90.5435	1.42227	1.64925
90.6435	1.42567	1.65033
90.7435	1.43808	1.65141
90.8435	1.45353	1.65249
90.9435	1.43739	1.65357
91.0435	1.44741	1.65465
91.1435	1.43519	1.65573
91.2435	1.44401	1.6568
91.3435	1.44249	1.65787
91.4435	1.43229	1.65894
91.5435	1.43739	1.66001
91.6435	1.42958	1.66108
91.7435	1.42958	1.66215
91.8435	1.43739	1.66322
91.9435	1.43229	1.66428
92.0435	1.43077	1.66535
92.1435	1.44401	1.66641
92.2435	1.44691	1.66747
92.3435	1.45913	1.66853
92.4435	1.45302	1.66959
92.5435	1.45352	1.67064
92.6435	1.45913	1.6717
92.7435	1.44962	1.67275
92.8435	1.44249	1.67381
92.9435	1.46354	1.67486
93.0435	1.45353	1.67591
93.1435	1.4408	1.67696
93.2435	1.46134	1.678
93.3435	1.44402	1.67905
93.4435	1.42838	1.6801
93.5435	1.43859	1.68114
93.6435	1.45692	1.68218
93.7435	1.45863	1.68322
93.8435	1.45132	1.68426
93.9435	1.47375	1.6853
94.0435	1.46355	1.68634
94.1435	1.46354	1.68737
94.2435	1.46202	1.68841
94.3435	1.47135	1.68944
94.4435	1.46644	1.69047
94.5435	1.47204	1.69151
94.6435	1.47968	1.69253
94.7435	1.46032	1.69356
94.8435	1.46644	1.69459
94.9435	1.47526	1.69561
95.0435	1.46814	1.69664
95.1435	1.48087	1.69766
95.2435	1.46864	1.69868
95.3435	1.47646	1.6997
95.4435	1.46354	1.70072
95.5435	1.46525	1.70174
95.6435	1.45692	1.70276
95.7435	1.46032	1.70377
95.8435	1.46133	1.70479
95.9435	1.45692	1.7058
96.0435	1.46864	1.70681
96.1435	1.47136	1.70782
96.2435	1.47816	1.70883
96.3435	1.48647	1.70984
96.4435	1.48988	1.71084
96.5435	1.48647	1.71185
96.6435	1.48597	1.71285
96.7435	1.49038	1.71386
96.8435	1.48427	1.71486
96.9435	1.48087	1.71586
97.0435	1.47866	1.71686
97.1435	1.47765	1.71785
97.2435	1.47816	1.71885
97.3435	1.47866	1.71984
97.4435	1.48937	1.72084
97.5435	1.49989	1.72183
97.6435	1.48817	1.72282
97.7435	1.49258	1.72381
97.8435	1.49819	1.7248
97.9435	1.48427	1.72579
98.0435	1.48087	1.72678
98.1435	1.47985	1.72776
98.2435	1.47305	1.72874
98.3435	1.48376	1.72973
98.4435	1.48937	1.73071
98.5435	1.47968	1.73169
98.6435	1.47646	1.73267
98.7435	1.47375	1.73365
98.8435	1.47526	1.73462
98.9435	1.46694	1.7356
99.0435	1.46644	1.73657
99.1435	1.46864	1.73754
99.2435	1.46864	1.73852
99.3435	1.47375	1.73949
99.4435	1.48647	1.74046
99.5435	1.50109	1.74142
99.6435	1.49258	1.74239
99.7435	1.49819	1.74336
99.8435	1.49599	1.74432
99.9435	1.49599	1.74528
100.044	1.49599	1.74624
100.144	1.49258	1.74721
100.244	1.505	1.74816
100.344	1.50991	1.74912
100.444	1.5055	1.75008
100.544	1.50991	1.75104
100.644	1.51281	1.75199
100.744	1.51552	1.75294
100.844	1.51942	1.7539
100.944	1.51111	1.75485
101.044	1.51552	1.7558
101.144	1.51722	1.75675
101.244	1.52554	1.75769
101.344	1.52383	1.75864
101.444	1.50771	1.75958
101.544	1.51552	1.76053
101.644	1.52213	1.76147
101.744	1.52113	1.76241
101.844	1.52163	1.76335
101.944	1.51212	1.76429
102.044	1.50771	1.76523
102.144	1.51212	1.76617
102.244	1.51501	1.7671
102.344	1.52384	1.76804
102.444	1.51772	1.76897
102.544	1.51041	1.7699
102.644	1.5055	1.77083
102.744	1.51432	1.77176
102.844	1.50771	1.77269
102.944	1.51552	1.77362
103.044	1.52283	1.77455
103.144	1.51994	1.77547
103.244	1.51722	1.7764
103.344	1.51823	1.77732
103.444	1.506	1.77824
103.544	1.51722	1.77916
103.644	1.53064	1.78008
103.744	1.53556	1.781
103.844	1.53385	1.78192
103.944	1.53233	1.78283
104.044	1.53385	1.78375
104.144	1.53233	1.78466
104.244	1.52876	1.78557
104.344	1.52503	1.78648
104.444	1.52944	1.78739
104.544	1.52383	1.7883
104.644	1.51552	1.78921
104.744	1.51942	1.79012
104.844	1.51942	1.79102
104.944	1.51041	1.79193
105.044	1.5128	1.79283
105.144	1.51212	1.79373
105.244	1.51772	1.79463
105.344	1.51212	1.79553
105.444	1.50771	1.79643
105.544	1.51602	1.79733
105.644	1.49819	1.79823
105.744	1.505	1.79912
105.844	1.51433	1.80002
105.944	1.50771	1.80091
106.044	1.51111	1.8018
106.144	1.51331	1.80269
106.244	1.51942	1.80358
106.344	1.52283	1.80447
106.444	1.52503	1.80536
106.544	1.52944	1.80625
106.644	1.53046	1.80713
106.744	1.52062	1.80801
106.844	1.51772	1.8089
106.944	1.51722	1.80978
107.044	1.52282	1.81066
107.144	1.52894	1.81154
107.244	1.52944	1.81242
107.344	1.53234	1.8133
107.444	1.52724	1.81417
107.544	1.52724	1.81505
107.644	1.53896	1.81592
107.744	1.54235	1.8168
107.844	1.53946	1.81767
107.944	1.53896	1.81854
108.044	1.52724	1.81941
108.144	1.53896	1.82028
108.244	1.52724	1.82115
108.344	1.53385	1.82201
108.444	1.52503	1.82288
108.544	1.51772	1.82374
108.644	1.52724	1.82461
108.744	1.51552	1.82547
108.844	1.52333	1.82633
108.944	1.53234	1.82719
109.044	1.54677	1.82805
109.144	1.54166	1.82891
109.244	1.53675	1.82976
109.344	1.54116	1.83062
109.444	1.53675	1.83147
109.544	1.53725	1.83233
109.644	1.54406	1.83318
109.744	1.54166	1.83403
109.844	1.54677	1.83488
109.944	1.54286	1.83573
110.044	1.53675	1.83658
110.144	1.54897	1.83743
110.244	1.54015	1.83827
110.344	1.55067	1.83912
110.444	1.54166	1.83996
110.544	1.53505	1.84081
110.644	1.53896	1.84165
110.744	1.53505	1.84249
110.844	1.52383	1.84333
110.944	1.53625	1.84417
111.044	1.52944	1.84501
111.144	1.54015	1.84584
111.244	1.54167	1.84668
111.344	1.54015	1.84751
111.444	1.55849	1.84835
111.544	1.55067	1.84918
111.644	1.54557	1.85001
111.744	1.53505	1.85084
111.844	1.53896	1.85167
111.944	1.53675	1.8525
112.044	1.53725	1.85333
112.144	1.52655	1.85415
112.244	1.51722	1.85498
112.344	1.52944	1.8558
112.444	1.52333	1.85662
112.544	1.52724	1.85745
112.644	1.53505	1.85827
112.744	1.53165	1.85909
112.844	1.51772	1.85991
112.944	1.51994	1.86072
113.044	1.52453	1.86154
113.144	1.52554	1.86236
113.244	1.53165	1.86317
113.344	1.53063	1.86399
113.444	1.53165	1.8648
113.544	1.52724	1.86561
113.644	1.51942	1.86642
113.744	1.51552	1.86723
113.844	1.52383	1.86804
113.944	1.52282	1.86885
114.044	1.53896	1.86966
114.144	1.52724	1.87046
114.244	1.52724	1.87127
114.344	1.52384	1.87207
114.444	1.52283	1.87287
114.544	1.52724	1.87367
114.644	1.53046	1.87447
114.744	1.51111	1.87527
114.844	1.51722	1.87607
114.944	1.50771	1.87687
115.044	1.51772	1.87767
115.144	1.51722	1.87846
115.244	1.52283	1.87926
115.344	1.52995	1.88005
115.444	1.52503	1.88084
115.544	1.52944	1.88164
115.644	1.53675	1.88243
115.744	1.53385	1.88322
115.844	1.52554	1.88401
115.944	1.53675	1.88479
116.044	1.53896	1.88558
116.144	1.53505	1.88637
116.244	1.53385	1.88715
116.344	1.53234	1.88793
116.444	1.52724	1.88872
116.544	1.53896	1.8895
116.644	1.53114	1.89028
116.744	1.53896	1.89106
116.844	1.54406	1.89184
116.944	1.55679	1.89262
117.044	1.55628	1.89339
117.144	1.56189	1.89417
117.244	1.55338	1.89494
117.344	1.55628	1.89572
117.444	1.56699	1.89649
117.544	1.5685	1.89726
117.644	1.559	1.89803
117.744	1.55458	1.8988
117.844	1.55968	1.89957
117.944	1.57802	1.90034
118.044	1.57021	1.90111
118.144	1.57361	1.90188
118.244	1.58312	1.90264
118.344	1.59245	1.9034
118.444	1.59755	1.90417
118.544	1.59415	1.90493
118.644	1.60094	1.90569
118.744	1.61777	1.90645
118.844	1.62811	1.90721
118.944	1.61708	1.90797
119.044	1.61437	1.90873
119.144	1.61708	1.90949
119.244	1.65173	1.91024
119.344	1.64442	1.911
119.444	1.60196	1.91175
119.544	1.60628	1.9125
119.644	1.57333	1.91325
119.744	1.52935	1.91401
119.844	1.52154	1.91476
119.944	1.53036	1.9155
120.044	1.51033	2.0914
120.144	1.4884	2.08897
120.244	1.47176	2.08654
120.344	1.49281	2.08411
120.444	1.46497	2.08169
120.544	1.45734	2.07927
120.644	1.44401	2.07685
120.744	1.46795	2.07443
120.844	1.489	2.07202
120.944	1.4958	2.06961
121.044	1.47457	2.0672
121.144	1.48087	2.0648
121.244	1.49921	2.0624
121.344	1.47526	2.06
121.444	1.47186	2.0576
121.544	1.46864	2.05521
121.644	1.47797	2.05282
121.744	1.47306	2.05043
121.844	1.45624	2.04804
121.944	1.44521	2.04566
122.044	1.42549	2.04328
122.144	1.41855	2.0409
122.244	1.43367	2.03853
122.344	1.47714	2.03616
122.444	1.49769	2.03379
122.544	1.51772	2.03142
122.644	1.50701	2.02906
122.744	1.51024	2.0267
122.844	1.47646	2.02434
122.944	1.49158	2.02199
123.044	1.47747	2.01963
123.144	1.45844	2.01728
123.244	1.44502	2.01494
123.344	1.42379	2.01259
123.444	1.39833	2.01025
123.544	1.38473	2.00791
123.644	1.3754	2.00558
123.744	1.38219	2.00324
123.844	1.39512	2.00091
123.944	1.40716	1.99859
124.044	1.39985	1.99626
124.144	1.39833	1.99394
124.244	1.39833	1.99162
124.344	1.40614	1.9893
124.444	1.38983	1.98699
124.544	1.38932	1.98468
124.644	1.38321	1.98237
124.744	1.3822	1.98006
124.844	1.37029	1.97776
124.944	1.34686	1.97546
125.044	1.34415	1.97316
125.144	1.35606	1.97086
125.244	1.3788	1.96857
125.344	1.3737	1.96628
125.444	1.3788	1.96399
125.544	1.40362	1.96171
125.644	1.41446	1.95943
125.744	1.40274	1.95715
125.844	1.39985	1.95487
125.944	1.38593	1.9526
126.044	1.38932	1.95033
126.144	1.40003	1.94806
126.244	1.38032	1.94579
126.344	1.35536	1.94353
126.444	1.34024	1.94127
126.544	1.34484	1.93901
126.644	1.34074	1.93675
126.744	1.31731	1.9345
126.844	1.29677	1.93225
126.944	1.30067	1.93
127.044	1.28638	1.92776
127.144	1.28831	1.92551
127.244	1.32021	1.92327
127.344	1.28638	1.92104
127.444	1.24599	1.9188
127.544	1.22305	1.91657
127.644	1.20251	1.91434
127.744	1.18739	1.91211
127.844	1.18739	1.90989
127.944	1.16786	1.90767
128.044	1.16396	1.90545
128.144	1.19332	1.90323
128.244	1.18399	1.90102
128.344	1.20761	1.89881
128.444	1.21864	1.8966
128.544	1.24006	1.89439
128.644	1.26772	1.89219
128.744	1.29286	1.88998
128.844	1.27655	1.88779
128.944	1.21708	1.88559
129.044	1.22972	1.8834
129.144	1.26161	1.88121
129.244	1.24497	1.87902
129.344	1.25108	1.87683
129.444	1.24258	1.87465
129.544	1.23817	1.87247
129.644	1.2645	1.87029
129.744	1.27062	1.86811
129.844	1.26212	1.86594
129.944	1.27453	1.86377
130.044	1.27604	1.8616
130.144	1.26874	1.85944
130.244	1.22182	1.85727
130.344	1.16873	1.85511
130.444	1.19249	1.85295
130.544	1.20522	1.8508
130.644	1.21644	1.84864
130.744	1.19332	1.84649
130.844	1.17296	1.84435
130.944	1.17448	1.8422
131.044	1.17756	1.84006
131.144	1.17379	1.83792
131.244	1.14764	1.83578
131.344	1.13133	1.83364
131.444	1.11777	1.83151
131.544	1.13661	1.82938
131.644	1.14833	1.82725
131.744	1.14833	1.82513
131.844	1.15173	1.823
131.944	1.15614	1.82088
132.044	1.14424	1.81876
132.144	1.10789	1.81665
132.244	1.12186	1.81453
132.344	1.14953	1.81242
132.444	1.17706	1.81032
132.544	1.1833	1.80821
132.644	1.16344	1.80611
132.744	1.16446	1.804
132.844	1.16157	1.80191
132.944	1.12811	1.79981
133.044	1.11299	1.79772
133.144	1.08123	1.79562
133.244	1.08141	1.79354
133.344	1.0612	1.79145
133.444	1.04998	1.78937
133.544	1.04677	1.78728
133.644	1.03165	1.7852
133.744	1.04557	1.78313
133.844	1.03555	1.78105
133.944	1.03914	1.77898
134.044	1.0687	1.77691
134.144	1.0651	1.77485
134.244	1.05849	1.77278
134.344	1.0663	1.77072
134.444	1.06511	1.76866
134.544	1.06479	1.7666
134.644	1.08463	1.76455
134.744	1.07802	1.76249
134.844	1.08974	1.76044
134.944	1.07291	1.75839
135.044	1.0663	1.75635
135.144	1.0714	1.75431
135.244	1.0663	1.75226
135.344	1.0651	1.75023
135.444	1.05628	1.74819
135.544	1.06069	1.74616
135.644	1.05458	1.74413
135.744	1.05849	1.7421
135.844	1.05186	1.74007
135.944	1.05849	1.73805
136.044	1.06189	1.73602
136.144	1.068	1.734
136.244	1.07682	1.73199
136.344	1.0663	1.72997
136.444	1.0663	1.72796
136.544	1.0612	1.72595
136.644	1.05849	1.72394
136.744	1.04847	1.72194
136.844	1.05339	1.71993
136.944	1.05407	1.71793
137.044	1.0578	1.71593
137.144	1.04167	1.71394
137.244	1.03505	1.71194
137.344	1.03675	1.70995
137.444	1.03896	1.70796
137.544	1.04235	1.70598
137.644	1.03386	1.70399
137.744	1.03675	1.70201
137.844	1.03063	1.70003
137.944	1.02995	1.69805
138.044	1.02894	1.69608
138.144	1.03046	1.6941
138.244	1.00733	1.69213
138.344	0.956238	1.69016
138.444	0.961334	1.6882
138.544	0.97393	1.68623
138.644	1.00619	1.68427
138.744	1.02283	1.68231
138.844	1.04337	1.68036
138.944	1.03777	1.6784
139.044	1.02283	1.67645
139.144	1.02912	1.6745
139.244	1.06699	1.67255
139.344	1.04999	1.6706
139.444	1.02976	1.66866
139.544	0.954391	1.66672
139.644	0.895164	1.66478
139.744	0.905319	1.66284
[truncated: 16,477 more rows]

## Sheet: Figure 2-figure supplement 1D
Time	Data
-60	2.25066
-59.9	2.24284
-59.8	2.23112
-59.7	2.21941
-59.6	2.22331
-59.5	2.22331
-59.4	2.20378
-59.3	2.22722
-59.2	2.21941
-59.1	2.23503
-59	2.23503
-58.9	2.23112
-58.8	2.20769
-58.7	2.19987
-58.6	2.19597
-58.5	2.19206
-58.4	2.19597
-58.3	2.17253
-58.2	2.153
-58.1	2.12956
-58	2.12566
-57.9	2.11003
-57.8	2.09441
-57.7	2.09441
-57.6	2.07487
-57.5	2.05925
-57.4	2.05925
-57.3	2.05144
-57.2	2.04362
-57.1	2.06316
-57	2.05144
-56.9	2.04362
-56.8	2.03191
-56.7	2.03191
-56.6	2.04362
-56.5	2.01237
-56.4	2.01237
-56.3	2.00456
-56.2	2.00847
-56.1	1.99284
-56	1.98112
-55.9	1.97722
-55.8	1.98112
-55.7	1.96159
-55.6	1.94206
-55.5	1.95378
-55.4	1.94987
-55.3	1.96159
-55.2	1.95378
-55.1	1.94206
-55	1.92253
-54.9	1.91862
-54.8	1.93034
-54.7	1.93034
-54.6	1.91081
-54.5	1.91081
-54.4	1.903
-54.3	1.89519
-54.2	1.89128
-54.1	1.88737
-54	1.89128
-53.9	1.87566
-53.8	1.86003
-53.7	1.83269
-53.6	1.82097
-53.5	1.81316
-53.4	1.83269
-53.3	1.83269
-53.2	1.80925
-53.1	1.81316
-53	1.81316
-52.9	1.80534
-52.8	1.80144
-52.7	1.78191
-52.6	1.78972
-52.5	1.79362
-52.4	1.80144
-52.3	1.78972
-52.2	1.778
-52.1	1.77409
-52	1.77409
-51.9	1.76237
-51.8	1.75456
-51.7	1.74284
-51.6	1.74284
-51.5	1.74284
-51.4	1.74284
-51.3	1.73112
-51.2	1.73894
-51.1	1.72331
-51	1.71941
-50.9	1.73503
-50.8	1.72331
-50.7	1.73503
-50.6	1.70769
-50.5	1.69597
-50.4	1.69597
-50.3	1.69206
-50.2	1.68816
-50.1	1.69206
-50	1.67253
-49.9	1.67253
-49.8	1.66081
-49.7	1.653
-49.6	1.66472
-49.5	1.653
-49.4	1.64128
-49.3	1.63347
-49.2	1.62566
-49.1	1.61394
-49	1.60222
-48.9	1.5905
-48.8	1.59441
-48.7	1.56316
-48.6	1.55144
-48.5	1.55925
-48.4	1.55925
-48.3	1.56706
-48.2	1.54362
-48.1	1.53972
-48	1.53581
-47.9	1.51628
-47.8	1.51237
-47.7	1.49675
-47.6	1.49284
-47.5	1.50066
-47.4	1.49284
-47.3	1.48112
-47.2	1.47722
-47.1	1.48112
-47	1.48112
-46.9	1.46159
-46.8	1.4655
-46.7	1.44206
-46.6	1.45769
-46.5	1.45378
-46.4	1.43816
-46.3	1.44206
-46.2	1.42253
-46.1	1.41081
-46	1.41472
-45.9	1.39128
-45.8	1.403
-45.7	1.39519
-45.6	1.39519
-45.5	1.36784
-45.4	1.38347
-45.3	1.37956
-45.2	1.36003
-45.1	1.37175
-45	1.36394
-44.9	1.36003
-44.8	1.37175
-44.7	1.34441
-44.6	1.35222
-44.5	1.32878
-44.4	1.33269
-44.3	1.32097
-44.2	1.32097
-44.1	1.30144
-44	1.30144
-43.9	1.30144
-43.8	1.29362
-43.7	1.278
-43.6	1.28191
-43.5	1.26237
-43.4	1.25847
-43.3	1.26628
-43.2	1.25456
-43.1	1.26237
-43	1.26237
-42.9	1.26237
-42.8	1.26237
-42.7	1.23894
-42.6	1.24284
-42.5	1.23503
-42.4	1.21941
-42.3	1.21941
-42.2	1.21159
-42.1	1.20378
-42	1.19987
-41.9	1.19206
-41.8	1.18425
-41.7	1.18425
-41.6	1.153
-41.5	1.15691
-41.4	1.153
-41.3	1.14128
-41.2	1.14128
-41.1	1.153
-41	1.15691
-40.9	1.14128
-40.8	1.13347
-40.7	1.12175
-40.6	1.10222
-40.5	1.09831
-40.4	1.10222
-40.3	1.09441
-40.2	1.09441
-40.1	1.10222
-40	1.07487
-39.9	1.08269
-39.8	1.09441
-39.7	1.07487
-39.6	1.06316
-39.5	1.08269
-39.4	1.06316
-39.3	1.08269
-39.2	1.09441
-39.1	1.08659
-39	1.06316
-38.9	1.07878
-38.8	1.06316
-38.7	1.05925
-38.6	1.06316
-38.5	1.05144
-38.4	1.07097
-38.3	1.05534
-38.2	1.05925
-38.1	1.06316
-38	1.07487
-37.9	1.07878
-37.8	1.06706
-37.7	1.07487
-37.6	1.06706
-37.5	1.06316
-37.4	1.08269
-37.3	1.08269
-37.2	1.07097
-37.1	1.07097
-37	1.06316
-36.9	1.06316
-36.8	1.05925
-36.7	1.06316
-36.6	1.07097
-36.5	1.08269
-36.4	1.09441
-36.3	1.0905
-36.2	1.09441
-36.1	1.07878
-36	1.08269
-35.9	1.08269
-35.8	1.07487
-35.7	1.07487
-35.6	1.07097
-35.5	1.07097
-35.4	1.06316
-35.3	1.04753
-35.2	1.04362
-35.1	1.03581
-35	1.04362
-34.9	1.03581
-34.8	1.02409
-34.7	1.00066
-34.6	0.988937
-34.5	0.973312
-34.4	0.981125
-34.3	0.973312
-34.2	0.961594
-34.1	0.961594
-34	0.961594
-33.9	0.949875
-33.8	0.945969
-33.7	0.942062
-33.6	0.953781
-33.5	0.942062
-33.4	0.910812
-33.3	0.910812
-33.2	0.891281
-33.1	0.891281
-33	0.903
-32.9	0.895187
-32.8	0.883469
-32.7	0.87175
-32.6	0.87175
-32.5	0.848312
-32.4	0.863937
-32.3	0.852219
-32.2	0.8405
-32.1	0.832687
-32	0.832687
-31.9	0.832687
-31.8	0.832687
-31.7	0.832687
-31.6	0.824875
-31.5	0.820969
-31.4	0.813156
-31.3	0.80925
-31.2	0.824875
-31.1	0.801437
-31	0.805344
-30.9	0.781906
-30.8	0.789719
-30.7	0.797531
-30.6	0.781906
-30.5	0.801437
-30.4	0.793625
-30.3	0.781906
-30.2	0.781906
-30.1	0.778
-30	0.785812
-29.9	0.789719
-29.8	0.793625
-29.7	0.774094
-29.6	0.781906
-29.5	0.770187
-29.4	0.785812
-29.3	0.758469
-29.2	0.774094
-29.1	0.781906
-29	0.770187
-28.9	0.770187
-28.8	0.781906
-28.7	0.774094
-28.6	0.781906
-28.5	0.789719
-28.4	0.785812
-28.3	0.762375
-28.2	0.789719
-28.1	0.774094
-28	0.774094
-27.9	0.774094
-27.8	0.781906
-27.7	0.750656
-27.6	0.754562
-27.5	0.762375
-27.4	0.754562
-27.3	0.762375
-27.2	0.750656
-27.1	0.766281
-27	0.750656
-26.9	0.762375
-26.8	0.774094
-26.7	0.778
-26.6	0.762375
-26.5	0.766281
-26.4	0.750656
-26.3	0.738937
-26.2	0.735031
-26.1	0.738937
-26	0.731125
-25.9	0.723312
-25.8	0.723312
-25.7	0.711594
-25.6	0.7155
-25.5	0.719406
-25.4	0.711594
-25.3	0.719406
-25.2	0.711594
-25.1	0.703781
-25	0.707687
-24.9	0.7155
-24.8	0.692062
-24.7	0.711594
-24.6	0.692062
-24.5	0.680344
-24.4	0.692062
-24.3	0.680344
-24.2	0.68425
-24.1	0.676437
-24	0.672531
-23.9	0.668625
-23.8	0.672531
-23.7	0.653
-23.6	0.641281
-23.5	0.653
-23.4	0.645187
-23.3	0.641281
-23.2	0.633469
-23.1	0.633469
-23	0.625656
-22.9	0.633469
-22.8	0.610031
-22.7	0.613937
-22.6	0.613937
-22.5	0.602219
-22.4	0.610031
-22.3	0.613937
-22.2	0.598312
-22.1	0.613937
-22	0.613937
-21.9	0.5905
-21.8	0.578781
-21.7	0.5905
-21.6	0.5905
-21.5	0.582687
-21.4	0.594406
-21.3	0.5905
-21.2	0.594406
-21.1	0.5905
-21	0.574875
-20.9	0.570969
-20.8	0.582687
-20.7	0.586594
-20.6	0.570969
-20.5	0.570969
-20.4	0.55925
-20.3	0.543625
-20.2	0.531906
-20.1	0.531906
-20	0.520187
-19.9	0.512375
-19.8	0.531906
-19.7	0.524094
-19.6	0.504562
-19.5	0.488937
-19.4	0.500656
-19.3	0.504562
-19.2	0.488937
-19.1	0.481125
-19	0.481125
-18.9	0.488937
-18.8	0.492844
-18.7	0.469406
-18.6	0.481125
-18.5	0.473312
-18.4	0.4655
-18.3	0.461594
-18.2	0.449875
-18.1	0.442062
-18	0.418625
-17.9	0.422531
-17.8	0.43425
-17.7	0.403
-17.6	0.403
-17.5	0.399094
-17.4	0.403
-17.3	0.383469
-17.2	0.379562
-17.1	0.383469
-17	0.360031
-16.9	0.375656
-16.8	0.352219
-16.7	0.332687
-16.6	0.344406
-16.5	0.324875
-16.4	0.3405
-16.3	0.356125
-16.2	0.344406
-16.1	0.352219
-16	0.332687
-15.9	0.3405
-15.8	0.344406
-15.7	0.352219
-15.6	0.332687
-15.5	0.332687
-15.4	0.348312
-15.3	0.344406
-15.2	0.352219
-15.1	0.352219
-15	0.352219
-14.9	0.352219
-14.8	0.348312
-14.7	0.356125
-14.6	0.3405
-14.5	0.324875
-14.4	0.3405
-14.3	0.332687
-14.2	0.332687
-14.1	0.332687
-14	0.324875
-13.9	0.332687
-13.8	0.3405
-13.7	0.320969
-13.6	0.344406
-13.5	0.305344
-13.4	0.332687
-13.3	0.332687
-13.2	0.320969
-13.1	0.320969
-13	0.313156
-12.9	0.328781
-12.8	0.320969
-12.7	0.313156
-12.6	0.313156
-12.5	0.313156
-12.4	0.317062
-12.3	0.313156
-12.2	0.313156
-12.1	0.320969
-12	0.313156
-11.9	0.305344
-11.8	0.293625
-11.7	0.313156
-11.6	0.30925
-11.5	0.317062
-11.4	0.313156
-11.3	0.313156
-11.2	0.293625
-11.1	0.289719
-11	0.301437
-10.9	0.285812
-10.8	0.281906
-10.7	0.30925
-10.6	0.301437
-10.5	0.293625
-10.4	0.281906
-10.3	0.281906
-10.2	0.274094
-10.1	0.274094
-10	0.274094
-9.9	0.281906
-9.8	0.270187
-9.7	0.274094
-9.6	0.281906
-9.5	0.270187
-9.4	0.262375
-9.3	0.262375
-9.2	0.258469
-9.1	0.270187
-9	0.254562
-8.9	0.262375
-8.8	0.266281
-8.7	0.250656
-8.6	0.254562
-8.5	0.2155
-8.4	0.231125
-8.3	0.219406
-8.2	0.223312
-8.1	0.223312
-8	0.223312
-7.9	0.2155
-7.8	0.227219
-7.7	0.203781
-7.6	0.2155
-7.5	0.211594
-7.4	0.078781
-7.3	0.00847
-7.2	-0.08919
-7.1	-0.37044
-7	-0.44856
-6.9	-0.56966
-6.8	-0.64778
-6.7	-0.87044
-6.6	-1.1595
-6.5	-1.11653
-6.4	-1.08919
-6.3	-0.89778
-6.2	-1.11653
-6.1	-1.097
-6	-1.13606
-5.9	-1.13606
-5.8	-1.15169
-5.7	-1.19075
-5.6	-1.18684
-5.5	-1.18684
-5.4	-1.21028
-5.3	-1.16341
-5.2	-1.1595
-5.1	-1.13997
-5	-1.1595
-4.9	-1.12825
-4.8	-1.11653
-4.7	-1.13997
-4.6	-1.12044
-4.5	-1.12044
-4.4	-1.11653
-4.3	-1.12825
-4.2	-1.13997
-4.1	-1.14778
-4	-1.17903
-3.9	-1.17122
-3.8	-1.16731
-3.7	-1.17903
-3.6	-1.17122
-3.5	-1.19856
-3.4	-1.23372
-3.3	-1.22981
-3.2	-1.24153
-3.1	-1.26888
-3	-1.28841
-2.9	-1.30013
-2.8	-1.24544
-2.7	-1.17903
-2.6	-1.13997
-2.5	-1.06575
-2.4	-0.91731
-2.3	-0.85481
-2.2	-0.76888
-2.1	-0.63997
-2	-0.56575
-1.9	-0.53841
-1.8	-0.55794
-1.7	-0.54622
-1.6	-0.60872
-1.5	-0.33528
-1.4	-0.75716
-1.3	-0.78841
-1.2	-0.89778
-1.1	-1.40559
-1	-1.36653
-0.9	-1.37434
-0.8	-1.30794
-0.7	-1.37044
-0.6	-1.46809
-0.5	-1.68684
-0.4	-1.92122
-0.3	-2.13606
-0.2	-2.31966
-0.1	-2.45638
0	-2.78841
0.099999	-2.61653
0.199997	-2.71809
0.300003	-2.722
0.400002	-2.75716
0.5	-2.68684
0.599998	-2.51888
0.699997	-2.41731
0.800003	-2.34309
0.900002	-2.27669
1	-2.19856
1.1	-2.17903
1.2	-2.10872
1.3	-2.05403
1.4	-2.03841
1.5	-1.97981
1.6	-1.97981
1.7	-1.96809
1.8	-1.92513
1.9	-1.88606
2	-1.85481
2.1	-1.81575
2.2	-1.79231
2.3	-1.78841
2.4	-1.76888
2.5	-1.74934
2.6	-1.73372
2.7	-1.68294
2.8	-1.6595
2.9	-1.67122
3	-1.64778
3.1	-1.63606
3.2	-1.64778
3.3	-1.62825
3.4	-1.60481
3.5	-1.63997
3.6	-1.60872
3.7	-1.597
3.8	-1.57747
3.9	-1.54622
4	-1.56966
4.1	-1.55013
4.2	-1.53841
4.3	-1.51106
4.4	-1.52669
4.5	-1.48763
4.6	-1.49934
4.7	-1.47981
4.8	-1.472
4.9	-1.47591
5	-1.46809
5.1	-1.44856
5.2	-1.46809
5.3	-1.46419
5.4	-1.48763
5.5	-1.46809
5.6	-1.45638
5.7	-1.46419
5.8	-1.44466
5.9	-1.42903
6	-1.43684
6.1	-1.43294
6.2	-1.45638
6.3	-1.46809
6.4	-1.44856
6.5	-1.46028
6.6	-1.46028
6.7	-1.46809
6.8	-1.44856
6.9	-1.43684
7	-1.42903
7.1	-1.41731
7.2	-1.41341
7.3	-1.42903
7.4	-1.41731
7.5	-1.4095
7.6	-1.39778
7.7	-1.39778
7.8	-1.40169
7.9	-1.37825
8	-1.38606
8.1	-1.38606
8.2	-1.37825
8.3	-1.347
8.4	-1.35872
8.5	-1.33919
8.6	-1.33528
8.7	-1.32747
8.8	-1.31966
8.9	-1.32747
9	-1.33919
9.1	-1.347
9.2	-1.32747
9.3	-1.34309
9.4	-1.33528
9.5	-1.32747
9.6	-1.33919
9.7	-1.33528
9.8	-1.34309
9.9	-1.33919
10	-1.347
10.1	-1.33528
10.2	-1.33919
10.3	-1.347
10.4	-1.33919
10.5	-1.35091
10.6	-1.33919
10.7	-1.32747
10.8	-1.31575
10.9	-1.31575
11	-1.33138
11.1	-1.32747
11.2	-1.31575
11.3	-1.33528
11.4	-1.347
11.5	-1.33919
11.6	-1.33919
11.7	-1.33528
11.8	-1.35091
11.9	-1.347
12	-1.347
12.1	-1.33919
12.2	-1.33919
12.3	-1.33528
12.4	-1.33919
12.5	-1.35091
12.6	-1.33528
12.7	-1.32747
12.8	-1.31575
12.9	-1.31966
13	-1.30403
13.1	-1.31184
13.2	-1.31966
13.3	-1.31184
13.4	-1.33919
13.5	-1.32747
13.6	-1.33919
13.7	-1.347
13.8	-1.33528
13.9	-1.35091
14	-1.35091
14.1	-1.33528
14.2	-1.33528
14.3	-1.33138
14.4	-1.31966
14.5	-1.30794
14.6	-1.29231
14.7	-1.31575
14.8	-1.31966
14.9	-1.32356
15	-1.32747
15.1	-1.32356
15.2	-1.31575
15.3	-1.347
15.4	-1.33528
15.5	-1.33919
15.6	-1.33919
15.7	-1.347
15.8	-1.347
15.9	-1.35872
16	-1.33919
16.1	-1.35872
16.2	-1.347
16.3	-1.347
16.4	-1.33528
16.5	-1.32747
16.6	-1.33919
16.7	-1.33919
16.8	-1.33919
16.9	-1.33919
17	-1.32747
17.1	-1.32747
17.2	-1.33919
17.3	-1.32747
17.4	-1.32747
17.5	-1.33919
17.6	-1.35872
17.7	-1.347
17.8	-1.37044
17.9	-1.35481
18	-1.33919
18.1	-1.34309
18.2	-1.35872
18.3	-1.347
18.4	-1.36653
18.5	-1.34309
18.6	-1.35481
18.7	-1.33528
18.8	-1.33528
18.9	-1.33919
19	-1.347
19.1	-1.32747
19.2	-1.33919
19.3	-1.347
19.4	-1.35872
19.5	-1.35481
19.6	-1.35091
19.7	-1.33919
19.8	-1.32747
19.9	-1.33919
20	-1.347
20.1	-1.347
20.2	-1.347
20.3	-1.33919
20.4	-1.347
20.5	-1.33919
20.6	-1.32747
20.7	-1.32747
20.8	-1.31575
20.9	-1.31575
21	-1.30403
21.1	-1.31575
21.2	-1.28841
21.3	-1.30013
21.4	-1.30794
21.5	-1.29622
21.6	-1.30794
21.7	-1.29622
21.8	-1.2845
21.9	-1.30403
22	-1.26888
22.1	-1.26888
22.2	-1.27669
22.3	-1.27669
22.4	-1.28841
22.5	-1.28841
22.6	-1.27669
22.7	-1.28841
22.8	-1.2845
22.9	-1.29622
23	-1.30013
23.1	-1.29622
23.2	-1.30013
23.3	-1.31966
23.4	-1.31575
23.5	-1.30403
23.6	-1.31575
23.7	-1.31184
23.8	-1.30403
23.9	-1.29622
24	-1.31575
24.1	-1.30794
24.2	-1.31575
24.3	-1.30794
24.4	-1.30794
24.5	-1.30794
24.6	-1.30013
24.7	-1.31575
24.8	-1.31966
24.9	-1.31575
25	-1.32747
25.1	-1.32356
25.2	-1.30794
25.3	-1.30794
25.4	-1.30794
25.5	-1.30013
25.6	-1.30013
25.7	-1.28841
25.8	-1.2845
25.9	-1.29622
26	-1.28841
26.1	-1.29622
26.2	-1.30794
26.3	-1.31575
26.4	-1.29622
26.5	-1.30013
26.6	-1.30794
26.7	-1.31575
26.8	-1.31575
26.9	-1.31966
27	-1.31966
27.1	-1.31966
27.2	-1.31575
27.3	-1.30403
27.4	-1.30403
27.5	-1.32747
27.6	-1.30794
27.7	-1.30013
27.8	-1.2845
27.9	-1.30013
28	-1.27669
28.1	-1.29231
28.2	-1.29622
28.3	-1.28841
28.4	-1.28841
28.5	-1.30794
28.6	-1.30013
28.7	-1.29622
28.8	-1.30794
28.9	-1.29622
29	-1.28841
29.1	-1.28841
29.2	-1.2845
29.3	-1.29622
29.4	-1.28841
29.5	-1.31184
29.6	-1.31184
29.7	-1.30403
29.8	-1.30794
29.9	-1.30794
30	-1.31966
30.1	-1.30013
30.2	-1.30013
30.3	-1.29622
30.4	-1.2845
30.5	-1.29622
30.6	-1.29622
30.7	-1.30794
30.8	-1.30013
30.9	-1.30794
31	-1.29622
31.1	-1.30013
31.2	-1.30013
31.3	-1.29231
31.4	-1.30403
31.5	-1.30794
31.6	-1.2845
31.7	-1.29622
31.8	-1.2845
31.9	-1.2845
32	-1.29622
32.1	-1.29622
32.2	-1.28841
32.3	-1.28059
32.4	-1.28841
32.5	-1.28059
32.6	-1.28059
32.7	-1.26497
32.8	-1.26888
32.9	-1.26888
33	-1.25716
33.1	-1.26497
33.2	-1.28059
33.3	-1.26497
33.4	-1.28841
33.5	-1.28059
33.6	-1.27669
33.7	-1.27669
33.8	-1.28059
33.9	-1.26888
34	-1.27669
34.1	-1.27669
34.2	-1.28841
34.3	-1.29622
34.4	-1.28841
34.5	-1.30794
34.6	-1.29622
34.7	-1.28841
34.8	-1.30013
34.9	-1.28841
35	-1.30794
35.1	-1.30794
35.2	-1.30013
35.3	-1.30794
35.4	-1.31575
35.5	-1.32747
35.6	-1.32747
35.7	-1.31575
35.8	-1.31575
35.9	-1.31966
36	-1.32747
36.1	-1.32747
36.2	-1.33919
36.3	-1.33528
36.4	-1.347
36.5	-1.347
36.6	-1.32747
36.7	-1.32747
36.8	-1.32747
36.9	-1.31966
37	-1.30794
37.1	-1.31966
37.2	-1.30794
37.3	-1.31966
37.4	-1.30013
37.5	-1.30794
37.6	-1.30403
37.7	-1.2845
37.8	-1.29622
37.9	-1.2845
38	-1.28841
38.1	-1.2845
38.2	-1.27669
38.3	-1.28841
38.4	-1.28059
38.5	-1.29231
38.6	-1.28841
38.7	-1.29622
38.8	-1.2845
38.9	-1.27669
39	-1.28841
39.1	-1.2845
39.2	-1.28841
39.3	-1.30013
39.4	-1.2845
39.5	-1.27669
39.6	-1.27669
39.7	-1.28841
39.8	-1.27669
39.9	-1.27669
40	-1.26888
40.1	-1.2845
40.2	-1.2845
40.3	-1.27669
40.4	-1.26888
40.5	-1.26106
40.6	-1.26106
40.7	-1.26888
40.8	-1.26888
40.9	-1.25716
41	-1.25716
41.1	-1.26888
41.2	-1.27669
41.3	-1.27669
41.4	-1.27669
41.5	-1.27278
41.6	-1.27669
41.7	-1.26497
41.8	-1.26888
41.9	-1.26888
42	-1.25716
42.1	-1.25716
42.2	-1.25325
42.3	-1.24544
42.4	-1.24934
42.5	-1.24934
42.6	-1.24934
42.7	-1.24934
42.8	-1.24153
42.9	-1.24544
43	-1.25716
43.1	-1.27669
43.2	-1.27669
43.3	-1.26888
43.4	-1.27669
43.5	-1.27278
43.6	-1.26888
43.7	-1.28059
43.8	-1.27278
43.9	-1.26497
44	-1.26888
44.1	-1.26888
44.2	-1.26497
44.3	-1.26497
44.4	-1.24544
44.5	-1.25716
44.6	-1.25716
44.7	-1.24934
44.8	-1.24934
44.9	-1.24934
45	-1.24934
45.1	-1.24934
45.2	-1.25325
45.3	-1.24934
45.4	-1.26106
45.5	-1.25716
45.6	-1.24544
45.7	-1.24544
45.8	-1.25716
45.9	-1.26888
46	-1.27669
46.1	-1.28841
46.2	-1.2845
46.3	-1.30013
46.4	-1.29622
46.5	-1.28841
46.6	-1.28841
46.7	-1.28059
46.8	-1.27669
46.9	-1.29231
47	-1.30013
47.1	-1.30013
47.2	-1.28841
47.3	-1.28841
47.4	-1.28841
47.5	-1.28841
47.6	-1.29622
47.7	-1.30013
47.8	-1.28841
47.9	-1.29622
48	-1.30794
48.1	-1.31575
48.2	-1.31575
48.3	-1.30403
48.4	-1.30794
48.5	-1.30794
48.6	-1.30794
48.7	-1.31966
48.8	-1.30403
48.9	-1.30403
49	-1.30794
49.1	-1.30794
49.2	-1.31575
49.3	-1.31575
49.4	-1.31966
49.5	-1.32747
49.6	-1.33138
49.7	-1.32747
49.8	-1.31966
49.9	-1.30794
50	-1.29622
50.1	-1.30013
50.2	-1.30013
50.3	-1.2845
50.4	-1.27669
50.5	-1.28059
50.6	-1.2845
50.7	-1.27669
50.8	-1.28059
50.9	-1.27669
51	-1.28059
51.1	-1.26888
51.2	-1.26888
51.3	-1.26497
51.4	-1.24544
51.5	-1.26888
51.6	-1.24544
51.7	-1.24934
51.8	-1.24153
51.9	-1.21419
52	-1.22591
52.1	-1.22981
52.2	-1.22981
52.3	-1.23763
52.4	-1.21419
52.5	-1.23763
52.6	-1.23763
52.7	-1.21809
52.8	-1.22591
52.9	-1.20638
53	-1.21809
53.1	-1.19856
53.2	-1.19856
53.3	-1.19466
53.4	-1.18684
53.5	-1.19856
53.6	-1.19856
53.7	-1.19856
53.8	-1.19856
53.9	-1.20638
54	-1.19466
54.1	-1.19856
54.2	-1.20638
54.3	-1.19856
54.4	-1.19856
54.5	-1.18684
54.6	-1.17903
54.7	-1.17513
54.8	-1.18684
54.9	-1.17122
55	-1.16731
55.1	-1.17513
55.2	-1.16731
55.3	-1.17122
55.4	-1.16731
55.5	-1.1595
55.6	-1.14778
55.7	-1.15559
55.8	-1.1595
55.9	-1.1595
56	-1.16341
56.1	-1.16731
56.2	-1.14778
56.3	-1.1595
56.4	-1.15169
56.5	-1.14388
56.6	-1.14778
56.7	-1.15559
56.8	-1.14778
56.9	-1.1595
57	-1.1595
57.1	-1.13216
57.2	-1.13606
57.3	-1.12825
57.4	-1.13606
57.5	-1.14778
57.6	-1.13606
57.7	-1.14778
57.8	-1.16731
57.9	-1.1595
58	-1.13997
58.1	-1.13606
58.2	-1.14778
58.3	-1.11653
58.4	-1.13997
58.5	-1.14388
58.6	-1.14778
58.7	-1.13606
58.8	-1.13997
58.9	-1.15169
59	-1.15559
59.1	-1.16731
59.2	-1.17903
59.3	-1.1595
59.4	-1.16731
59.5	-1.14778
59.6	-1.15559
59.7	-1.17122
59.8	-1.16731
59.9	-1.16731
60	-1.16731
60.1	-1.16731
60.2	-1.17903
60.3	-1.15559
60.4	-1.16731
60.5	-1.1595
60.6	-1.14778
60.7	-1.17122
60.8	-1.1595
60.9	-1.1595
61	-1.14778
61.1	-1.16731
61.2	-1.1595
61.3	-1.14778
61.4	-1.15559
61.5	-1.16731
61.6	-1.14778
61.7	-1.14388
61.8	-1.14778
61.9	-1.14778
62	-1.15559
62.1	-1.1595
62.2	-1.15559
62.3	-1.16731
62.4	-1.1595
62.5	-1.16341
62.6	-1.1595
62.7	-1.17122
62.8	-1.14778
62.9	-1.14778
63	-1.15559
63.1	-1.14778
63.2	-1.13997
63.3	-1.15559
63.4	-1.14778
63.5	-1.12825
63.6	-1.14778
63.7	-1.13606
63.8	-1.13997
63.9	-1.12434
64	-1.15169
64.1	-1.13997
64.2	-1.14778
64.3	-1.14778
64.4	-1.1595
64.5	-1.1595
64.6	-1.15559
64.7	-1.16731
64.8	-1.17903
64.9	-1.15559
65	-1.16731
65.1	-1.15559
65.2	-1.15559
65.3	-1.15559
65.4	-1.17122
65.5	-1.16731
65.6	-1.16731
65.7	-1.16731
65.8	-1.17122
65.9	-1.16341
66	-1.16341
66.1	-1.17903
66.2	-1.16731
66.3	-1.17513
66.4	-1.19075
66.5	-1.18684
66.6	-1.18684
66.7	-1.21028
66.8	-1.20638
66.9	-1.21809
67	-1.21028
67.1	-1.20638
67.2	-1.21809
67.3	-1.20638
67.4	-1.21809
67.5	-1.20247
67.6	-1.21809
67.7	-1.21419
67.8	-1.22591
67.9	-1.23763
68	-1.24153
68.1	-1.25716
68.2	-1.24153
68.3	-1.23763
68.4	-1.24934
68.5	-1.23763
68.6	-1.23763
68.7	-1.23763
68.8	-1.23763
68.9	-1.24934
69	-1.23763
69.1	-1.24544
69.2	-1.24934
69.3	-1.24934
69.4	-1.24544
69.5	-1.24544
69.6	-1.25716
69.7	-1.25716
69.8	-1.25716
69.9	-1.25716
70	-1.26888
70.1	-1.25716
70.2	-1.26106
70.3	-1.26497
70.4	-1.24544
70.5	-1.24544
70.6	-1.26106
70.7	-1.26497
70.8	-1.26106
70.9	-1.26888
71	-1.26497
71.1	-1.25325
71.2	-1.24544
71.3	-1.25716
71.4	-1.24934
71.5	-1.24544
71.6	-1.24544
71.7	-1.24544
71.8	-1.24544
71.9	-1.24934
72	-1.26888
72.1	-1.25716
72.2	-1.24934
72.3	-1.25716
72.4	-1.26888
72.5	-1.26106
72.6	-1.25716
72.7	-1.26497
72.8	-1.26497
72.9	-1.26497
73	-1.27669
73.1	-1.28059
73.2	-1.26888
73.3	-1.27669
73.4	-1.27669
73.5	-1.27669
73.6	-1.28059
73.7	-1.27669
73.8	-1.27669
73.9	-1.26888
74	-1.27669
74.1	-1.26888
74.2	-1.25325
74.3	-1.24934
74.4	-1.26888
74.5	-1.26497
74.6	-1.27669
74.7	-1.28059
74.8	-1.25716
74.9	-1.26888
75	-1.24934
75.1	-1.25716
75.2	-1.24544
75.3	-1.24934
75.4	-1.24934
75.5	-1.25325
75.6	-1.24934
75.7	-1.25716
75.8	-1.24934
75.9	-1.23763
76	-1.23372
76.1	-1.24544
76.2	-1.23763
76.3	-1.25716
76.4	-1.24934
76.5	-1.24934
76.6	-1.25716
76.7	-1.25716
76.8	-1.25716
76.9	-1.25716
77	-1.26888
77.1	-1.25716
77.2	-1.26106
77.3	-1.26497
77.4	-1.24934
77.5	-1.23372
77.6	-1.22591
77.7	-1.23763
77.8	-1.23763
77.9	-1.24153
78	-1.23763
78.1	-1.21419
78.2	-1.22981
78.3	-1.24544
78.4	-1.23763
78.5	-1.22981
78.6	-1.22591
78.7	-1.22981
78.8	-1.22591
78.9	-1.22981
79	-1.21419
79.1	-1.20638
79.2	-1.20638
79.3	-1.22591
79.4	-1.22591
79.5	-1.21809
79.6	-1.21028
79.7	-1.21028
79.8	-1.20638
79.9	-1.21809
80	-1.20638
80.1	-1.21028
80.2	-1.20638
80.3	-1.20638
80.4	-1.19856
80.5	-1.18684
80.6	-1.18684
80.7	-1.18684
80.8	-1.21028
80.9	-1.19466
81	-1.19856
81.1	-1.19466
81.2	-1.19856
81.3	-1.19466
81.4	-1.19856
81.5	-1.19856
81.6	-1.18684
81.7	-1.19856
81.8	-1.19856
81.9	-1.21028
82	-1.19466
82.1	-1.19856
82.2	-1.19856
82.3	-1.19856
82.4	-1.18684
82.5	-1.19466
82.6	-1.18684
82.7	-1.19856
82.8	-1.20638
82.9	-1.19466
83	-1.21028
83.1	-1.21809
83.2	-1.22591
83.3	-1.22591
83.4	-1.23763
83.5	-1.22981
83.6	-1.23763
83.7	-1.24544
83.8	-1.25716
83.9	-1.24934
84	-1.23372
84.1	-1.24934
84.2	-1.23372
84.3	-1.25716
84.4	-1.25716
84.5	-1.25716
84.6	-1.26106
84.7	-1.24934
84.8	-1.25716
84.9	-1.24544
85	-1.26497
85.1	-1.26888
85.2	-1.25716
85.3	-1.26888
85.4	-1.26888
85.5	-1.25716
85.6	-1.28059
85.7	-1.26497
85.8	-1.28059
85.9	-1.27669
86	-1.2845
86.1	-1.25716
86.2	-1.26497
86.3	-1.27278
86.4	-1.26888
86.5	-1.25716
86.6	-1.27669
86.7	-1.29622
86.8	-1.27669
86.9	-1.28841
87	-1.29231
87.1	-1.29622
87.2	-1.28841
87.3	-1.28841
87.4	-1.27669
87.5	-1.29231
87.6	-1.28059
87.7	-1.2845
87.8	-1.28841
87.9	-1.27669
88	-1.25716
88.1	-1.27669
88.2	-1.28841
88.3	-1.26497
88.4	-1.28841
88.5	-1.28841
88.6	-1.27669
88.7	-1.30013
88.8	-1.28841
88.9	-1.29622
89	-1.30013
89.1	-1.30403
89.2	-1.30013
89.3	-1.29622
89.4	-1.30794
89.5	-1.31184
89.6	-1.30013
89.7	-1.30403
89.8	-1.29622
89.9	-1.31966
90	-1.30794
90.1	-1.29622
90.2	-1.30013
90.3	-1.31575
90.4	-1.32747
90.5	-1.33138
90.6	-1.32747
90.7	-1.32747
90.8	-1.30794
90.9	-1.31575
91	-1.29622
91.1	-1.30013
91.2	-1.29622
91.3	-1.31575
91.4	-1.29622
91.5	-1.30794
91.6	-1.31575
91.7	-1.30794
91.8	-1.30794
91.9	-1.31575
92	-1.32747
92.1	-1.30794
92.2	-1.30794
92.3	-1.29622
92.4	-1.30013
92.5	-1.30013
92.6	-1.29622
92.7	-1.30013
92.8	-1.28841
92.9	-1.28841
93	-1.29622
93.1	-1.29622
93.2	-1.28059
93.3	-1.28841
93.4	-1.29622
93.5	-1.30794
93.6	-1.30013
93.7	-1.28841
93.8	-1.28059
93.9	-1.28841
94	-1.26497
94.1	-1.26888
94.2	-1.28059
94.3	-1.27669
94.4	-1.28059
94.5	-1.26497
94.6	-1.26888
94.7	-1.28841
94.8	-1.26888
94.9	-1.26497
95	-1.27669
95.1	-1.26106
95.2	-1.27669
95.3	-1.26497
95.4	-1.27669
95.5	-1.28059
95.6	-1.27669
95.7	-1.28841
95.8	-1.27278
95.9	-1.27669
96	-1.27669
96.1	-1.26888
96.2	-1.28059
96.3	-1.27278
96.4	-1.27669
96.5	-1.27669
96.6	-1.26888
96.7	-1.27278
96.8	-1.28059
96.9	-1.28059
97	-1.2845
97.1	-1.30013
97.2	-1.28841
97.3	-1.27669
97.4	-1.26888
97.5	-1.26888
97.6	-1.26888
97.7	-1.26497
97.8	-1.26497
97.9	-1.28059
98	-1.27669
98.1	-1.2845
98.2	-1.28059
98.3	-1.29622
98.4	-1.30013
98.5	-1.27669
98.6	-1.30403
98.7	-1.29622
98.8	-1.29622
98.9	-1.29622
99	-1.30013
99.1	-1.30013
99.2	-1.28841
99.3	-1.29622
99.4	-1.2845
99.5	-1.29622
99.6	-1.27669
99.7	-1.29622
99.8	-1.30013
99.9	-1.29622
100	-1.30013
100.1	-1.30013
100.2	-1.30794
100.3	-1.30403
100.4	-1.30013
100.5	-1.2845
100.6	-1.30013
100.7	-1.28841
100.8	-1.27669
100.9	-1.28841
101	-1.26888
101.1	-1.26888
101.2	-1.26497
101.3	-1.26888
101.4	-1.27669
101.5	-1.27669
101.6	-1.27669
101.7	-1.28841
101.8	-1.28841
101.9	-1.29231
102	-1.29622
102.1	-1.2845
102.2	-1.29231
102.3	-1.28841
102.4	-1.29622
102.5	-1.29622
102.6	-1.30013
102.7	-1.30794
102.8	-1.30794
102.9	-1.30794
103	-1.30794
103.1	-1.30013
103.2	-1.30794
103.3	-1.30403
103.4	-1.31575
103.5	-1.31966
103.6	-1.30794
103.7	-1.30794
103.8	-1.30403
103.9	-1.31966
104	-1.30403
104.1	-1.31575
104.2	-1.29622
104.3	-1.31966
104.4	-1.32356
104.5	-1.33138
104.6	-1.32747
104.7	-1.33919
104.8	-1.33528
104.9	-1.32747
105	-1.32747
105.1	-1.31966
105.2	-1.32747
105.3	-1.32747
105.4	-1.32747
105.5	-1.32747
105.6	-1.33528
105.7	-1.33919
105.8	-1.32356
105.9	-1.32747
106	-1.33919
106.1	-1.31966
106.2	-1.31575
106.3	-1.31575
106.4	-1.30794
106.5	-1.30403
106.6	-1.30794
106.7	-1.33138
106.8	-1.31966
106.9	-1.33138
107	-1.31575
107.1	-1.30794
107.2	-1.31575
107.3	-1.31184
107.4	-1.29622
107.5	-1.29622
107.6	-1.29622
107.7	-1.28841
107.8	-1.28059
107.9	-1.29622
108	-1.2845
108.1	-1.29622
108.2	-1.29622
108.3	-1.29622
108.4	-1.30794
108.5	-1.30403
108.6	-1.31966
108.7	-1.30794
108.8	-1.30794
108.9	-1.31184
109	-1.30013
109.1	-1.28841
109.2	-1.30794
109.3	-1.30403
109.4	-1.30013
109.5	-1.2845
109.6	-1.30013
109.7	-1.28841
109.8	-1.28841
109.9	-1.29622
110	-1.29622
110.1	-1.29622
110.2	-1.30013
110.3	-1.28841
110.4	-1.29622
110.5	-1.30794
110.6	-1.30794
110.7	-1.30013
110.8	-1.31184
110.9	-1.30794
111	-1.30403
111.1	-1.30013
111.2	-1.30013
111.3	-1.31184
111.4	-1.28841
111.5	-1.29622
111.6	-1.29622
111.7	-1.29622
111.8	-1.30794
111.9	-1.30013
112	-1.29231
112.1	-1.29622
112.2	-1.31966
112.3	-1.31575
112.4	-1.30794
112.5	-1.30794
112.6	-1.30794
112.7	-1.30794
112.8	-1.31575
112.9	-1.31184
113	-1.31966
113.1	-1.31575
113.2	-1.30794
113.3	-1.32747
113.4	-1.31966
113.5	-1.31575
113.6	-1.30794
113.7	-1.31966
113.8	-1.31966
113.9	-1.32356
114	-1.30794
114.1	-1.30794
114.2	-1.30013
114.3	-1.30013
114.4	-1.30403
114.5	-1.30794
114.6	-1.30794
114.7	-1.31575
114.8	-1.31184
114.9	-1.30794
115	-1.30403
115.1	-1.30013
115.2	-1.29622
115.3	-1.28841
115.4	-1.30013
115.5	-1.29622
115.6	-1.28841
115.7	-1.2845
115.8	-1.29622
115.9	-1.30013
116	-1.29622
116.1	-1.29622
116.2	-1.30794
116.3	-1.30794
116.4	-1.30794
116.5	-1.30013
116.6	-1.30013
116.7	-1.29622
116.8	-1.29622
116.9	-1.27669
117	-1.29231
117.1	-1.29622
117.2	-1.27669
117.3	-1.28841
117.4	-1.27669
117.5	-1.25716
117.6	-1.26106
117.7	-1.26888
117.8	-1.27669
117.9	-1.26497
118	-1.26497
118.1	-1.26497
118.2	-1.25716
118.3	-1.24544
118.4	-1.25716
118.5	-1.25716
118.6	-1.25716
118.7	-1.26106
118.8	-1.24934
118.9	-1.28059
119	-1.27669
119.1	-1.27669
119.2	-1.29622
119.3	-1.30794
119.4	-1.32747
119.5	-1.33528
119.6	-1.21028
119.7	-1.06966
119.8	-0.9095
119.9	-0.74934
120	-0.597
120.1	-0.46809
120.2	-0.33919
120.3	-0.16731
120.4	-0.01888
120.5	0.117844
120.6	0.281906
120.7	0.301437
120.8	0.289719
120.9	0.270187
121	0.231125
121.1	0.242844
121.2	0.254562
121.3	0.231125
121.4	0.211594
121.5	0.192062
121.6	0.203781
121.7	0.199875
121.8	0.211594
121.9	0.180344
122	0.180344
122.1	0.164719
122.2	0.156906
122.3	0.192062
122.4	0.231125
122.5	0.235031
122.6	0.211594
122.7	0.199875
122.8	0.172531
122.9	0.172531
123	0.180344
123.1	0.176437
123.2	0.141281
123.3	0.102219
123.4	0.094406
123.5	0.070969
123.6	0.043625
123.7	0.031906
123.8	0.039719
123.9	0.063156
124	0.055344
124.1	0.043625
124.2	0.043625
124.3	0.051437
124.4	0.051437
124.5	0.031906
124.6	0.00847
124.7	0.000656
124.8	0.000656
124.9	0.000656
125	-0.03059
125.1	-0.03841
125.2	-0.01888
125.3	-0.01888
125.4	-0.03059
125.5	-0.01888
125.6	0.020187
125.7	0.012375
125.8	0.00456
125.9	-0.02669
126	-0.04622
126.1	-0.06184
126.2	-0.04622
126.3	-0.06966
126.4	-0.06966
126.5	-0.07747
126.6	-0.07747
126.7	-0.10091
126.8	-0.11653
126.9	-0.13606
127	-0.13606
127.1	-0.17513
127.2	-0.11653
127.3	-0.10481
127.4	-0.1595
127.5	-0.14778
127.6	-0.14388
127.7	-0.14778
127.8	-0.13997
127.9	-0.12044
128	-0.08919
128.1	-0.08919
128.2	-0.12044
128.3	-0.14778
128.4	-0.15559
128.5	-0.17513
128.6	-0.17513
128.7	-0.19075
128.8	-0.22981
128.9	-0.24934
129	-0.38606
129.1	-0.31575
129.2	-0.35481
129.3	-0.31966
129.4	-0.29622
129.5	-0.31575
129.6	-0.32747
129.7	-0.30013
129.8	-0.28841
129.9	-0.30403
130	-0.30794
130.1	-0.2845
130.2	-0.36653
130.3	-0.47591
130.4	-0.43684
130.5	-0.40559
130.6	-0.4095
130.7	-0.40559
130.8	-0.42903
130.9	-0.40559
131	-0.41731
131.1	-0.42903
131.2	-0.41731
131.3	-0.41731
131.4	-0.44466
131.5	-0.41731
131.6	-0.42903
131.7	-0.41731
131.8	-0.40559
131.9	-0.38997
132	-0.37044
132.1	-0.4095
132.2	-0.47591
132.3	-0.42122
132.4	-0.39778
132.5	-0.35872
132.6	-0.35481
132.7	-0.33919
132.8	-0.36653
132.9	-0.40169
133	-0.4095
133.1	-0.42513
133.2	-0.44466
133.3	-0.43684
133.4	-0.44075
133.5	-0.46809
133.6	-0.47981
133.7	-0.48763
133.8	-0.49934
133.9	-0.50716
134	-0.49934
134.1	-0.46419
134.2	-0.46809
134.3	-0.47591
134.4	-0.46809
134.5	-0.48763
134.6	-0.45638
134.7	-0.46419
134.8	-0.45638
134.9	-0.45638
135	-0.47981
135.1	-0.47981
135.2	-0.47591
135.3	-0.48372
135.4	-0.51106
135.5	-0.49544
135.6	-0.48763
135.7	-0.49153
135.8	-0.49934
135.9	-0.47981
136	-0.47591
136.1	-0.46809
136.2	-0.45247
136.3	-0.47981
136.4	-0.47591
136.5	-0.47981
136.6	-0.48763
136.7	-0.48763
136.8	-0.48372
136.9	-0.49544
137	-0.48763
137.1	-0.50716
137.2	-0.51106
137.3	-0.51888
137.4	-0.51497
137.5	-0.51497
137.6	-0.50716
137.7	-0.51888
137.8	-0.49544
137.9	-0.48763
138	-0.47981
138.1	-0.45638
138.2	-0.48372
138.3	-0.56184
138.4	-0.60091
138.5	-0.63997
138.6	-0.58528
138.7	-0.55403
138.8	-0.55013
138.9	-0.58528
139	-0.58919
139.1	-0.55013
139.2	-0.47591
139.3	-0.44466
139.4	-0.45638
139.5	-0.48763
139.6	-0.35872
139.7	-0.12044
139.8	0.024094
[truncated: 16,475 more rows]

## Sheet: Figure 2-figure supplement 1F
Time	Data
-60.02	-0.1109
-59.92	-0.09918
-59.82	-0.10309
-59.72	-0.11247
-59.62	-0.10309
-59.52	-0.12106
-59.42	-0.11794
-59.32	-0.13277
-59.22	-0.11324
-59.12	-0.10622
-59.02	-0.09762
-58.92	-0.09528
-58.82	-0.08746
-58.72	-0.09215
-58.62	-0.08278
-58.52	-0.07418
-58.42	-0.0695
-58.32	-0.06403
-58.22	-0.07574
-58.12	-0.07574
-58.02	-0.07809
-57.92	-0.0734
-57.82	-0.08199
-57.72	-0.08356
-57.62	-0.06559
-57.52	-0.08512
-57.42	-0.08434
-57.32	-0.07731
-57.22	-0.08746
-57.12	-0.08356
-57.02	-0.07418
-56.92	-0.08121
-56.82	-0.07731
-56.72	-0.07262
-56.62	-0.08121
-56.52	-0.07418
-56.42	-0.06403
-56.32	-0.08122
-56.22	-0.07418
-56.12	-0.07731
-56.02	-0.07574
-55.92	-0.06403
-55.82	-0.06637
-55.72	-0.04996
-55.62	-0.04449
-55.52	-0.04684
-55.42	-0.0484
-55.32	-0.0695
-55.22	-0.05465
-55.12	-0.10075
-55.02	-0.11481
-54.92	-0.11481
-54.82	-0.12653
-54.72	-0.11481
-54.62	-0.12262
-54.52	-0.09762
-54.42	-0.0484
-54.32	-0.03043
-54.22	-0.02184
-54.12	-0.00543
-54.02	-0.01324
-53.92	-0.00543
-53.82	-0.01481
-53.72	-0.01715
-53.62	-0.01715
-53.52	-0.03434
-53.42	-0.04293
-53.32	-0.0234
-53.22	-0.01871
-53.12	-0.05621
-53.02	-0.05856
-52.92	-0.02653
-52.82	-0.05465
-52.72	-0.06168
-52.62	-0.08122
-52.52	-0.09605
-52.42	-0.09684
-52.32	-0.09918
-52.22	-0.09528
-52.12	-0.07965
-52.02	-0.03668
-51.92	-0.00934
-51.82	-0.10236
-51.72	-0.76402
-51.62	0.08601
-51.52	0.057068
-51.42	0.130508
-51.32	-0.02028
-51.22	-0.05231
-51.12	0.00706
-51.02	0.013321
-50.92	0.088318
-50.82	-0.02263
-50.72	-0.21715
-50.62	-0.28513
-50.52	-0.17184
-50.42	-0.07652
-50.32	-0.06325
-50.22	-0.08356
-50.12	-0.05465
-50.02	-0.04449
-49.92	-0.03278
-49.82	-0.00621
-49.72	-0.007
-49.62	0.00785
-49.52	-0.00309
-49.42	0.015663
-49.32	0.00706
-49.22	0.011757
-49.12	0.00472
-49.02	-0.00387
-48.92	0.00785
-48.82	0.014877
-48.72	0.023476
-48.62	0.016441
-48.52	0.023476
-48.42	0.024254
-48.32	0.031289
-48.22	0.039101
-48.12	0.026596
-48.02	0.023476
-47.92	0.037537
-47.82	0.025818
-47.72	0.025818
-47.62	0.014099
-47.52	0.018005
-47.42	0.019569
-47.32	-0.00934
-47.22	-0.01871
-47.12	-0.03434
-47.02	-0.03278
-46.92	-0.05074
-46.82	-0.05934
-46.72	-0.05309
-46.62	-0.03668
-46.52	-0.01715
-46.42	-0.01324
-46.32	-0.00387
-46.22	-0.02028
-46.12	-0.04293
-46.02	-0.06012
-45.92	-0.05621
-45.82	-0.08903
-45.72	-0.1109
-45.62	-0.11481
-45.52	-0.12106
-45.42	-0.12575
-45.32	-0.12653
-45.22	-0.10152
-45.12	-0.07809
-45.02	-0.03278
-44.92	-0.03902
-44.82	-0.04372
-44.72	-0.04684
-44.62	-0.04606
-44.52	-0.05621
-44.42	-0.04137
-44.32	-0.04606
-44.22	-0.06012
-44.12	-0.06403
-44.02	-0.05778
-43.92	-0.05856
-43.82	-0.06403
-43.72	-0.05778
-43.62	-0.04293
-43.52	-0.03825
-43.42	-0.05465
-43.32	-0.04449
-43.22	-0.05387
-43.12	-0.06246
-43.02	-0.05231
-42.92	-0.03512
-42.82	-0.03825
-42.72	-0.03278
-42.62	-0.02106
-42.52	-0.03434
-42.42	-0.02184
-42.32	-0.03043
-42.22	-0.03278
-42.12	-0.04449
-42.02	-0.04215
-41.92	-0.05621
-41.82	-0.0484
-41.72	-0.04449
-41.62	-0.05231
-41.52	-0.05621
-41.42	-0.06246
-41.32	-0.04606
-41.22	-0.05074
-41.12	-0.04606
-41.02	-0.05621
-40.92	-0.04684
-40.82	-0.02653
-40.72	-0.02496
-40.62	-0.03434
-40.52	-0.01559
-40.42	-0.02496
-40.32	-0.02653
-40.22	-0.0234
-40.12	-0.0234
-40.02	-0.01871
-39.92	-0.03278
-39.82	-0.01559
-39.72	-0.01324
-39.62	-0.01324
-39.52	-0.00153
-39.42	-0.01481
-39.32	-0.0234
-39.22	-0.007
-39.12	-0.01324
-39.02	-0.00543
-38.92	-0.01715
-38.82	-0.00777
-38.72	-0.00153
-38.62	-0.0109
-38.52	-0.01168
-38.42	-0.01324
-38.32	-0.01324
-38.22	-0.01324
-38.12	-0.00153
-38.02	-0.00153
-37.92	-0.00153
-37.82	-0.00309
-37.72	-0.01324
-37.62	-0.0109
-37.52	-0.03121
-37.42	-0.00934
-37.32	-0.01481
-37.22	-0.01559
-37.12	-0.00153
-37.02	-0.01324
-36.92	-0.0023
-36.82	-0.01637
-36.72	-0.00543
-36.62	-0.01324
-36.52	-0.01481
-36.42	-0.0023
-36.32	-0.02262
-36.22	-0.02653
-36.12	-0.03121
-36.02	-0.03825
-35.92	-0.03668
-35.82	-0.02965
-35.72	-0.04372
-35.62	-0.03355
-35.52	-0.0359
-35.42	-0.03355
-35.32	-0.02653
-35.22	-0.02496
-35.12	-0.02496
-35.02	-0.03668
-34.92	-0.02496
-34.82	-0.03278
-34.72	-0.03902
-34.62	-0.04606
-34.52	-0.03668
-34.42	-0.03512
-34.32	-0.03043
-34.22	-0.03512
-34.12	-0.04059
-34.02	-0.04996
-33.92	-0.04293
-33.82	-0.05387
-33.72	-0.04684
-33.62	-0.05543
-33.52	-0.03512
-33.42	-0.02965
-33.32	-0.0359
-33.22	-0.03825
-33.12	-0.03355
-33.02	-0.02653
-32.92	-0.03121
-32.82	-0.0359
-32.72	-0.02731
-32.62	-0.03121
-32.52	-0.04059
-32.42	-0.04606
-32.32	-0.05387
-32.22	-0.04527
-32.12	-0.04996
-32.02	-0.03355
-31.92	-0.04372
-31.82	-0.04137
-31.72	-0.04372
-31.62	-0.04137
-31.52	-0.04996
-31.42	-0.04606
-31.32	-0.05621
-31.22	-0.04449
-31.12	-0.03512
-31.02	-0.04215
-30.92	-0.03512
-30.82	-0.05387
-30.72	-0.03512
-30.62	-0.03278
-30.52	-0.03278
-30.42	-0.03981
-30.32	-0.02574
-30.22	-0.02653
-30.12	-0.01715
-30.02	-0.01168
-29.92	-0.00387
-29.82	-0.00465
-29.72	-0.01168
-29.62	-0.01324
-29.52	-0.01324
-29.42	-0.02106
-29.32	-0.01324
-29.22	-0.02262
-29.12	-0.01324
-29.02	-0.01559
-28.92	-0.00543
-28.82	-0.01481
-28.72	0.00394
-28.62	-0.00777
-28.52	-0.01247
-28.42	-0.00543
-28.32	-0.0023
-28.22	-0.00465
-28.12	-0.00543
-28.02	0.012535
-27.92	0.00941
-27.82	0.000816
-27.72	-0.0023
-27.62	0.00472
-27.52	-0.00309
-27.42	0.00394
-27.32	0.018005
-27.22	0.00629
-27.12	0.014099
-27.02	0.010971
-26.92	0.011757
-26.82	0.00785
-26.72	0.024254
-26.62	0.019569
-26.52	0.015663
-26.42	0.014877
-26.32	0.02504
-26.22	0.014877
-26.12	0.025818
-26.02	0.017227
-25.92	0.014877
-25.82	0.021912
-25.72	0.03363
-25.62	0.033631
-25.52	0.036758
-25.42	0.026596
-25.32	0.031288
-25.22	0.00863
-25.12	0.015664
-25.02	0.018005
-24.92	0.016441
-24.82	0.015664
-24.72	0.018005
-24.62	0.018005
-24.52	0.00863
-24.42	0.00629
-24.32	0.015663
-24.22	0.025818
-24.12	0.014099
-24.02	0.014099
-23.92	-0.00309
-23.82	0.015664
-23.72	0.024254
-23.62	0.019569
-23.52	0.00629
-23.42	0.010971
-23.32	0.00551
-23.22	0.00863
-23.12	-0.00543
-23.02	0.011757
-22.92	0.00472
-22.82	0.00238
-22.72	-0.0023
-22.62	-0.00465
-22.52	-0.0234
-22.42	-0.01324
-22.32	-0.007
-22.22	-0.01715
-22.12	-0.00543
-22.02	-0.01168
-21.92	-0.007
-21.82	-0.00543
-21.72	-0.01168
-21.62	-0.01871
-21.52	-0.00543
-21.42	-0.0023
-21.32	0.00472
-21.22	-0.00309
-21.12	-0.00543
-21.02	3.81e-05
-20.92	-0.02262
-20.82	-0.02496
-20.72	-0.01715
-20.62	-0.02653
-20.52	-0.01715
-20.42	0.0016
-20.32	-0.00153
-20.22	-0.00153
-20.12	-0.00153
-20.02	-0.01324
-19.92	-0.00387
-19.82	-0.00153
-19.72	0.00706
-19.62	-0.00543
-19.52	0.015663
-19.42	0.018005
-19.32	0.018005
-19.22	0.00706
-19.12	0.00629
-19.02	0.023476
-18.92	0.00785
-18.82	0.00629
-18.72	0.00472
-18.62	0.014099
-18.52	0.023476
-18.42	0.014099
-18.32	0.014099
-18.22	0.02504
-18.12	0.029724
-18.02	0.020348
-17.92	0.00629
-17.82	0.012536
-17.72	0.020348
-17.62	0.036759
-17.52	0.043785
-17.42	0.039101
-17.32	0.020348
-17.22	0.00863
-17.12	0.015663
-17.02	-0.00309
-16.92	0.010193
-16.82	0.0141
-16.72	0.02504
-16.62	0.025818
-16.52	0.019569
-16.42	-0.00231
-16.32	-0.00543
-16.22	-0.01168
-16.12	-0.00387
-16.02	-0.00465
-15.92	0.00941
-15.82	0.000817
-15.72	-0.007
-15.62	-0.0023
-15.52	-0.00465
-15.42	-0.00543
-15.32	-0.00543
-15.22	-0.00387
-15.12	-0.00153
-15.02	-0.00777
-14.92	-0.00309
-14.82	-0.00153
-14.72	-0.00387
-14.62	-0.00153
-14.52	-0.00153
-14.42	-0.0109
-14.32	-0.01325
-14.22	-0.02496
-14.12	-0.02496
-14.02	-0.0234
-13.92	-0.03278
-13.82	-0.02653
-13.72	-0.02496
-13.62	-0.03668
-13.52	-0.02496
-13.42	-0.01559
-13.32	-0.03043
-13.22	-0.03278
-13.12	-0.02653
-13.02	-0.0234
-12.92	-0.02496
-12.82	-0.03668
-12.72	-0.03043
-12.62	-0.02887
-12.52	-0.02731
-12.42	-0.03434
-12.32	-0.02496
-12.22	-0.03668
-12.12	-0.02731
-12.02	-0.02496
-11.92	-0.02496
-11.82	-0.01559
-11.72	-0.00153
-11.62	-0.01324
-11.52	-0.01324
-11.42	-0.01324
-11.32	-0.02106
-11.22	-0.02106
-11.12	-0.02106
-11.02	-0.02106
-10.92	-0.01324
-10.82	-0.02106
-10.72	-0.02496
-10.62	-0.03278
-10.52	-0.04059
-10.42	-0.04059
-10.32	-0.04215
-10.22	-0.03825
-10.12	-0.03668
-10.02	-0.03668
-9.92	-0.03668
-9.82	-0.03668
-9.72	-0.0484
-9.62	-0.0484
-9.52	-0.03902
-9.42	-0.04215
-9.32	-0.03512
-9.22	-0.04449
-9.12	-0.04449
-9.02	-0.05621
-8.92	-0.04684
-8.82	-0.04215
-8.72	-0.04449
-8.62	-0.05231
-8.52	-0.05856
-8.42	-0.04606
-8.32	-0.04449
-8.22	-0.04293
-8.12	-0.04449
-8.02	-0.03825
-7.92	-0.05387
-7.82	-0.05621
-7.72	-0.05621
-7.62	-0.05621
-7.52	-0.0234
-7.42	0.016441
-7.32	0.023473
-7.22	0.025818
-7.12	-0.2945
-7.02	0.256287
-6.92	-0.25309
-6.82	-0.16792
-6.72	-0.1234
-6.62	0.16175
-6.52	0.135193
-6.42	0.074257
-6.32	-0.09917
-6.22	0.129723
-6.12	0.194623
-6.02	0.146912
-5.92	0.53363
-5.82	0.432843
-5.72	0.293785
-5.62	0.204712
-5.52	0.182068
-5.42	0.126602
-5.32	0.111755
-5.22	0.075035
-5.12	0.057069
-5.02	0.075035
-4.92	0.066444
-4.82	0.05941
-4.72	0.058632
-4.62	0.067224
-4.52	0.075821
-4.42	0.088318
-4.32	0.098473
-4.22	0.073471
-4.12	0.015664
-4.02	0.016441
-3.92	0.025818
-3.82	0.078164
-3.72	0.076599
-3.62	0.028162
-3.52	0.05629
-3.42	0.025818
-3.32	-0.03434
-3.22	-0.12496
-3.12	-0.13198
-3.02	-0.06793
-2.92	0.039879
-2.82	0.125044
-2.72	0.128944
-2.62	0.086757
-2.52	-0.00621
-2.42	-0.12575
-2.32	0.039107
-2.22	0.390663
-2.12	0.556255
-2.02	0.382065
-1.92	0.316437
-1.82	0.282057
-1.72	0.248474
-1.62	0.232842
-1.52	0.230507
-1.42	0.289879
-1.32	0.167225
-1.22	0.169563
-1.12	0.06723
-1.02	0.010979
-0.92	0.031281
-0.82	0.012547
-0.72	-0.03121
-0.62	-0.08198
-0.52	-0.16715
-0.42	0.151596
-0.32	-0.01402
-0.22	0.334412
-0.12	2.87262
-0.02	5.73519
0.080002	7.53831
0.180004	5.9735
0.280003	-0.22184
0.380005	-3.93507
0.480003	-4.8195
0.580002	-4.76559
0.680004	-4.61716
0.780003	-4.51247
0.880005	-4.30076
0.980003	-4.19138
1.08	-3.95856
1.18	-3.81949
1.28	-3.72965
1.38	-3.6859
1.48	-3.64527
1.58	-3.65778
1.68	-3.66871
1.78001	-3.66169
1.88	-3.67965
1.98	-3.76324
2.08	-3.75934
2.18	-3.84684
2.28001	-3.95779
2.38	-4.02262
2.48	-4.13981
2.58	-4.23512
2.68	-4.35387
2.78001	-4.45388
2.88	-4.57887
2.98	-4.69606
3.08	-4.78825
3.18	-4.91949
3.28001	-5.00075
3.38	-5.11012
3.48	-5.20465
3.58	-5.29372
3.68	-5.39215
3.78001	-5.44997
3.88	-5.54527
3.98	-5.62887
4.08	-5.70856
4.18	-5.77809
4.28001	-5.84371
4.38	-5.92419
4.48	-5.97262
4.58	-6.05621
4.68	-6.12183
4.78001	-6.16559
4.88	-6.24996
4.98	-6.32418
5.08	-6.41402
5.18	-6.45699
5.28001	-6.5445
5.38	-6.60777
5.48	-6.68903
5.58	-6.74606
5.68	-6.80621
5.78001	-6.8734
5.88	-6.93668
5.98	-6.99606
6.08	-7.04293
6.18	-7.0859
6.28001	-7.13668
6.38	-7.15778
6.48	-7.20309
6.58	-7.26168
6.68	-7.2984
6.78001	-7.34762
6.88	-7.38434
6.98	-7.41402
7.08	-7.46246
7.18	-7.50543
7.28001	-7.53512
7.38	-7.56403
7.48	-7.62887
7.58	-7.63824
7.68	-7.68199
7.78001	-7.71481
7.88	-7.7359
7.98	-7.77106
8.08	-7.80856
8.18	-7.82418
8.28001	-7.85465
8.38	-7.88121
8.48	-7.91325
8.58	-7.90855
8.68	-7.96012
8.78001	-7.98434
8.88	-8.02887
8.98	-8.08043
9.08	-8.12184
9.18	-8.15308
9.28001	-8.1984
9.38	-8.18512
9.48	-8.20152
9.58	-8.24371
9.68	-8.24996
9.78001	-8.26715
9.88	-8.28825
9.98	-8.29527
10.08	-8.29059
10.18	-8.29293
10.28	-8.29449
10.38	-8.30465
10.48	-8.37262
10.58	-8.37028
10.68	-8.3734
10.78	-8.39371
10.88	-8.39059
10.98	-8.39606
11.08	-8.41949
11.18	-8.41168
11.28	-8.42731
11.38	-8.44684
11.48	-8.47262
11.58	-8.45699
11.68	-8.50543
11.78	-8.51559
11.88	-8.53668
11.98	-8.52887
12.08	-8.53512
12.18	-8.51247
12.28	-8.54762
12.38	-8.54996
12.48	-8.5484
12.58	-8.52262
12.68	-8.52184
12.78	-8.54059
12.88	-8.53121
12.98	-8.54606
13.08	-8.53512
13.18	-8.5484
13.28	-8.56793
13.38	-8.54449
13.48	-8.54918
13.58	-8.52106
13.68	-8.52731
13.78	-8.51715
13.88	-8.50934
13.98	-8.53668
14.08	-8.54684
14.18	-8.53668
14.28	-8.54606
14.38	-8.52731
14.48	-8.56403
14.58	-8.56168
14.68	-8.57496
14.78	-8.60231
14.88	-8.61715
14.98	-8.61871
15.08	-8.63277
15.18	-8.62184
15.28	-8.64293
15.38	-8.65778
15.48	-8.65778
15.58	-8.65387
15.68	-8.66949
15.78	-8.66012
15.88	-8.6484
15.98	-8.64606
16.08	-8.66559
16.18	-8.65387
16.28	-8.66715
16.38	-8.66793
16.48	-8.67027
16.58	-8.68903
16.68	-8.69059
16.78	-8.70309
16.88	-8.71871
16.98	-8.72575
17.08	-8.73668
17.18	-8.75856
17.28	-8.77887
17.38	-8.7734
17.48	-8.80465
17.58	-8.80231
17.68	-8.79293
17.78	-8.79684
17.88	-8.83512
17.98	-8.85699
18.08	-8.87653
18.18	-8.88824
18.28	-8.91168
18.38	-8.91949
18.48	-8.91949
18.58	-8.8984
18.68	-8.90934
18.78	-8.92809
18.88	-8.95856
18.98	-8.96637
19.08	-8.97965
19.18	-8.97262
19.28	-8.97262
19.38	-8.98981
19.48	-9.00934
19.58	-9.01324
19.68	-9.01949
19.78	-9.02887
19.88	-9.01949
19.98	-9.01559
20.08	-9.02419
20.18	-9.0234
20.28	-9.04059
20.38	-9.05231
20.48	-9.0484
20.58	-9.06246
20.68	-9.07652
20.78	-9.09918
20.88	-9.11715
20.98	-9.1359
21.08	-9.15778
21.18	-9.16949
21.28	-9.19137
21.38	-9.17887
21.48	-9.18356
21.58	-9.17965
21.68	-9.19684
21.78	-9.17965
21.88	-9.18825
21.98	-9.18043
22.08	-9.19059
22.18	-9.20074
22.28	-9.19137
22.38	-9.20856
22.48	-9.23043
22.58	-9.22809
22.68	-9.23199
22.78	-9.19918
22.88	-9.20856
22.98	-9.23746
23.08	-9.25777
23.18	-9.24762
23.28	-9.25934
23.38	-9.26949
23.48	-9.25777
23.58	-9.27496
23.68	-9.31012
23.78	-9.30855
23.88	-9.29762
23.98	-9.30699
24.08	-9.30778
24.18	-9.31012
24.28	-9.3398
24.38	-9.33981
24.48	-9.35856
24.58	-9.36871
24.68	-9.37106
24.78	-9.38434
24.88	-9.38121
24.98	-9.41325
25.08	-9.41793
25.18	-9.42731
25.28	-9.46246
25.38	-9.48434
25.48	-9.47809
25.58	-9.50934
25.68	-9.50309
25.78	-9.50777
25.88	-9.52731
25.98	-9.51871
26.08	-9.5484
26.18	-9.56793
26.28	-9.56246
26.38	-9.5484
26.48	-9.56012
26.58	-9.56012
26.68	-9.53746
26.78	-9.55621
26.88	-9.5734
26.98	-9.57418
27.08	-9.58121
27.18	-9.58199
27.28	-9.56793
27.38	-9.57027
27.48	-9.59684
27.58	-9.6109
27.68	-9.61715
27.78	-9.63824
27.88	-9.62653
27.98	-9.64449
28.08	-9.66949
28.18	-9.66559
28.28	-9.66402
28.38	-9.6734
28.48	-9.68903
28.58	-9.66559
28.68	-9.67887
28.78	-9.70699
28.88	-9.71793
28.98	-9.73824
29.08	-9.72809
29.18	-9.70934
29.28	-9.71637
29.38	-9.73746
29.48	-9.74996
29.58	-9.76324
29.68	-9.78043
29.78	-9.79059
29.88	-9.76949
29.98	-9.75934
30.08	-9.75621
30.18	-9.78825
30.28	-9.78902
30.38	-9.79372
30.48	-9.80152
30.58	-9.79996
30.68	-9.7984
30.78	-9.81012
30.88	-9.81871
30.98	-9.85465
31.08	-9.8609
31.18	-9.88824
31.28	-9.91402
31.38	-9.92106
31.48	-9.9359
31.58	-9.9445
31.68	-9.96715
31.78	-9.98669
31.88	-10.0007
31.98	-9.98356
32.08	-10.0156
32.18	-10.0109
32.28	-10.0156
32.38	-9.9859
32.48	-9.97809
32.58	-9.98981
32.68	-9.98043
32.78	-9.97574
32.88	-9.97262
32.98	-9.96637
33.08	-9.94137
33.18	-9.95856
33.28	-9.94918
33.38	-9.94684
33.48	-9.96481
33.58	-9.97809
33.68	-9.96012
33.78	-9.97652
33.88	-9.98043
33.98	-9.97809
34.08	-9.99762
34.18	-9.99137
34.28	-10.0039
34.38	-10.0461
34.48	-10.0523
34.58	-10.0468
34.68	-10.0406
34.78	-10.0492
34.88	-10.0718
34.98	-10.0851
35.08	-10.0773
35.18	-10.0859
35.28	-10.0843
35.38	-10.0679
35.48	-10.0562
35.58	-10.0656
35.68	-10.0679
35.78	-10.0875
35.88	-10.0875
35.98	-10.0968
36.08	-10.1093
36.18	-10.0976
36.28	-10.0781
36.38	-10.0625
36.48	-10.0789
36.58	-10.0664
36.68	-10.0742
36.78	-10.0906
36.88	-10.0859
36.98	-10.0961
37.08	-10.0867
37.18	-10.0937
37.28	-10.1148
37.38	-10.1211
37.48	-10.1218
37.58	-10.1289
37.68	-10.1156
37.78	-10.1359
37.88	-10.1476
37.98	-10.1609
38.08	-10.1687
38.18	-10.164
38.28	-10.1515
38.38	-10.1578
38.48	-10.1468
38.58	-10.1461
38.68	-10.1593
38.78	-10.1734
38.88	-10.1812
38.98	-10.1781
39.08	-10.1867
39.18	-10.1875
39.28	-10.2156
39.38	-10.2289
39.48	-10.2281
39.58	-10.2226
39.68	-10.239
39.78	-10.2382
39.88	-10.2421
39.98	-10.2554
40.08	-10.2648
40.18	-10.2679
40.28	-10.2648
40.38	-10.2687
40.48	-10.289
40.58	-10.289
40.68	-10.2672
40.78	-10.2539
40.88	-10.257
40.98	-10.2539
41.08	-10.2414
41.18	-10.2359
41.28	-10.2257
41.38	-10.2382
41.48	-10.2382
41.58	-10.2297
41.68	-10.2265
41.78	-10.2398
41.88	-10.2265
41.98	-10.2125
42.08	-10.2242
42.18	-10.2086
42.28	-10.2125
42.38	-10.2031
42.48	-10.2062
42.58	-10.2031
42.68	-10.2047
42.78	-10.2062
42.88	-10.2148
42.98	-10.2281
43.08	-10.2375
43.18	-10.2171
43.28	-10.232
43.38	-10.2375
43.48	-10.257
43.58	-10.2601
43.68	-10.257
43.78	-10.2578
43.88	-10.2593
43.98	-10.2398
44.08	-10.2343
44.18	-10.2375
44.28	-10.2382
44.38	-10.2453
44.48	-10.2461
44.58	-10.2398
44.68	-10.2554
44.78	-10.257
44.88	-10.2523
44.98	-10.2554
45.08	-10.2414
45.18	-10.2351
45.28	-10.2336
45.38	-10.2203
45.48	-10.1968
45.58	-10.2062
45.68	-10.207
45.78	-10.2179
45.88	-10.2125
45.98	-10.2015
46.08	-10.1851
46.18	-10.1984
46.28	-10.182
46.38	-10.1867
46.48	-10.175
46.58	-10.1757
46.68	-10.1757
46.78	-10.1765
46.88	-10.1875
46.98	-10.1695
47.08	-10.1773
47.18	-10.1757
47.28	-10.1851
47.38	-10.1914
47.48	-10.1961
47.58	-10.1968
47.68	-10.2031
47.78	-10.2007
47.88	-10.2047
47.98	-10.1953
48.08	-10.2156
48.18	-10.2187
48.28	-10.207
48.38	-10.2125
48.48	-10.2086
48.58	-10.2125
48.68	-10.2062
48.78	-10.2086
48.88	-10.207
48.98	-10.2047
49.08	-10.2125
49.18	-10.2062
49.28	-10.207
49.38	-10.2031
49.48	-10.1953
49.58	-10.2039
49.68	-10.2047
49.78	-10.1953
49.88	-10.1773
49.98	-10.1828
50.08	-10.1757
50.18	-10.1734
50.28	-10.1695
50.38	-10.1617
50.48	-10.1945
50.58	-10.1757
50.68	-10.1851
50.78	-10.1757
50.88	-10.1906
50.98	-10.1836
51.08	-10.1789
51.18	-10.1734
51.28	-10.1757
51.38	-10.1672
51.48	-10.1625
51.58	-10.1422
51.68	-10.1515
51.78	-10.1562
51.88	-10.1437
51.98	-10.1461
52.08	-10.1445
52.18	-10.1336
52.28	-10.1367
52.38	-10.1328
52.48	-10.1422
52.58	-10.1265
52.68	-10.132
52.78	-10.1187
52.88	-10.1132
52.98	-10.1148
53.08	-10.1226
53.18	-10.1281
53.28	-10.1171
53.38	-10.1086
53.48	-10.1117
53.58	-10.1257
53.68	-10.125
53.78	-10.1172
53.88	-10.1257
53.98	-10.1171
54.08	-10.1203
54.18	-10.1234
54.28	-10.1164
54.38	-10.125
54.48	-10.1171
54.58	-10.1257
54.68	-10.1171
54.78	-10.1109
54.88	-10.1054
54.98	-10.0929
55.08	-10.0976
55.18	-10.0968
55.28	-10.0953
55.38	-10.0859
55.48	-10.089
55.58	-10.0953
55.68	-10.0875
55.78	-10.0859
55.88	-10.0953
55.98	-10.0859
56.08	-10.0914
56.18	-10.0851
56.28	-10.0859
56.38	-10.0773
56.48	-10.0742
56.58	-10.0656
56.68	-10.0726
56.78	-10.0773
56.88	-10.0757
56.98	-10.0859
57.08	-10.0734
57.18	-10.0742
57.28	-10.0656
57.38	-10.0757
57.48	-10.0773
57.58	-10.0797
57.68	-10.0843
57.78	-10.0757
57.88	-10.0718
57.98	-10.0679
58.08	-10.0546
58.18	-10.0539
58.28	-10.0546
58.38	-10.0461
58.48	-10.0562
58.58	-10.0562
58.68	-10.0664
58.78	-10.0445
58.88	-10.0523
58.98	-10.0578
59.08	-10.0468
59.18	-10.0289
59.28	-10.0296
59.38	-10.0461
59.48	-10.0312
59.58	-10.0437
59.68	-10.0406
59.78	-10.0351
59.88	-10.0367
59.98	-10.014
60.08	-10.0125
60.18	-10.0078
60.28	-10.0265
60.38	-10.0172
60.48	-10.0265
60.58	-10.0195
60.68	-10.0172
60.78	-10.0078
60.88	-10.0054
60.98	-9.9859
61.08	-9.96793
61.18	-9.96324
61.28	-9.95621
61.38	-9.95699
61.48	-9.97418
61.58	-9.96793
61.68	-9.95699
61.78	-9.96012
61.88	-9.94684
61.98	-9.95699
62.08	-9.95621
62.18	-9.95699
62.28	-9.93355
62.38	-9.93512
62.48	-9.95465
62.58	-9.96403
62.68	-9.95856
62.78	-9.97105
62.88	-9.98746
62.98	-9.97809
63.08	-9.97652
63.18	-9.98199
63.28	-9.99918
63.38	-9.99606
63.48	-10.007
63.58	-10.0195
63.68	-9.99996
63.78	-9.99684
63.88	-10.0046
63.98	-10.007
64.08	-9.99762
64.18	-9.99215
64.28	-9.99528
64.38	-9.99762
64.48	-10.0132
64.58	-10.0039
64.68	-10.007
64.78	-9.98981
64.88	-9.9859
64.98	-9.99606
65.08	-9.97262
65.18	-9.97575
65.28	-9.97965
65.38	-9.97652
65.48	-9.95856
65.58	-9.97262
65.68	-9.96637
65.78	-9.97418
65.88	-9.97028
65.98	-9.95699
66.08	-9.93668
66.18	-9.93746
66.28	-9.93668
66.38	-9.9195
66.48	-9.92106
66.58	-9.89527
66.68	-9.90309
66.78	-9.90074
66.88	-9.90543
66.98	-9.89762
67.08	-9.88355
67.18	-9.89528
67.28	-9.89449
67.38	-9.89996
67.48	-9.89762
67.58	-9.90934
67.68	-9.90465
67.78	-9.89606
67.88	-9.89215
67.98	-9.87496
68.08	-9.88356
68.18	-9.87887
68.28	-9.85543
68.38	-9.84137
68.48	-9.82731
68.58	-9.82574
68.68	-9.81637
68.78	-9.82497
68.88	-9.82262
68.98	-9.81012
69.08	-9.80231
69.18	-9.80778
69.28	-9.80465
69.38	-9.7945
69.48	-9.81402
69.58	-9.79606
69.68	-9.78512
69.78	-9.78512
69.88	-9.77496
69.98	-9.77653
70.08	-9.78278
70.18	-9.78825
70.28	-9.78355
70.38	-9.78043
70.48	-9.76559
70.58	-9.76324
70.68	-9.757
70.78	-9.7523
70.88	-9.73746
70.98	-9.72262
71.08	-9.73512
71.18	-9.72652
71.28	-9.72105
71.38	-9.71403
71.48	-9.70856
71.58	-9.68355
71.68	-9.67497
71.78	-9.66559
71.88	-9.66715
71.98	-9.65621
72.08	-9.64449
72.18	-9.66168
72.28	-9.65231
72.38	-9.64371
72.48	-9.64215
72.58	-9.65231
72.68	-9.64528
72.78	-9.63668
72.88	-9.63434
72.98	-9.61871
73.08	-9.61481
73.18	-9.60543
73.28	-9.59684
73.38	-9.59528
73.48	-9.59528
73.58	-9.5859
73.68	-9.58356
73.78	-9.58356
73.88	-9.57731
73.98	-9.5648
74.08	-9.56012
74.18	-9.55387
74.28	-9.54293
74.38	-9.55231
74.48	-9.55231
74.58	-9.55231
74.68	-9.55231
74.78	-9.54293
74.88	-9.56168
74.98	-9.56402
75.08	-9.54293
75.18	-9.55231
75.28	-9.55231
75.38	-9.54606
75.48	-9.53278
75.58	-9.54606
75.68	-9.54449
75.78	-9.54449
75.88	-9.54449
75.98	-9.54449
76.08	-9.54449
76.18	-9.55621
76.28	-9.55621
76.38	-9.56402
76.48	-9.56403
76.58	-9.56403
76.68	-9.56403
76.78	-9.56403
76.88	-9.56403
76.98	-9.56403
77.08	-9.57184
77.18	-9.57184
77.28	-9.58356
77.38	-9.58356
77.48	-9.58356
77.58	-9.58356
77.68	-9.58356
77.78	-9.60152
77.88	-9.59528
77.98	-9.59528
78.08	-9.59528
78.18	-9.60309
78.28	-9.60309
78.38	-9.60309
78.48	-9.61481
78.58	-9.60309
78.68	-9.60153
78.78	-9.60856
78.88	-9.60465
78.98	-9.59528
79.08	-9.60699
79.18	-9.59528
79.28	-9.59528
79.38	-9.59528
79.48	-9.59137
79.58	-9.59137
79.68	-9.59137
79.78	-9.59528
79.88	-9.59528
79.98	-9.58356
80.08	-9.58356
80.18	-9.57575
80.28	-9.57574
80.38	-9.57184
80.48	-9.57184
80.58	-9.56637
80.68	-9.56403
80.78	-9.55231
80.88	-9.56403
80.98	-9.57184
81.08	-9.56246
81.18	-9.55231
81.28	-9.55231
81.38	-9.56168
81.48	-9.55231
81.58	-9.55231
81.68	-9.56403
81.78	-9.55465
81.88	-9.54606
81.98	-9.53278
82.08	-9.53434
82.18	-9.52496
82.28	-9.53668
82.38	-9.53668
82.48	-9.52496
82.58	-9.52731
82.68	-9.51559
82.78	-9.51324
82.88	-9.51324
82.98	-9.50153
83.08	-9.49528
83.18	-9.49371
83.28	-9.47965
83.38	-9.47809
83.48	-9.46637
83.58	-9.44762
83.68	-9.44293
83.78	-9.44293
83.88	-9.44293
83.98	-9.43121
84.08	-9.41872
84.18	-9.41559
84.28	-9.41949
84.38	-9.41949
84.48	-9.42731
84.58	-9.41793
84.68	-9.41559
84.78	-9.41559
84.88	-9.40387
84.98	-9.39449
85.08	-9.39215
85.18	-9.3859
85.28	-9.37496
85.38	-9.38434
85.48	-9.38434
85.58	-9.38434
85.68	-9.38434
85.78	-9.38277
85.88	-9.38043
85.98	-9.38043
86.08	-9.37418
86.18	-9.37262
86.28	-9.37262
86.38	-9.36324
86.48	-9.3609
86.58	-9.37028
86.68	-9.36324
86.78	-9.3609
86.88	-9.35465
86.98	-9.36246
87.08	-9.35543
87.18	-9.35309
87.28	-9.35309
87.38	-9.34684
87.48	-9.33746
87.58	-9.33746
87.68	-9.32809
87.78	-9.32574
87.88	-9.33199
87.98	-9.32418
88.08	-9.32184
88.18	-9.32184
88.28	-9.30387
88.38	-9.30231
88.48	-9.30231
88.58	-9.30465
88.68	-9.29449
88.78	-9.29762
88.88	-9.30465
88.98	-9.29684
89.08	-9.28278
89.18	-9.29215
89.28	-9.29449
89.38	-9.29606
89.48	-9.29137
89.58	-9.29059
89.68	-9.29059
89.78	-9.28278
89.88	-9.27653
89.98	-9.27496
90.08	-9.26012
90.18	-9.25309
90.28	-9.2609
90.38	-9.25777
90.48	-9.26481
90.58	-9.25543
90.68	-9.26168
90.78	-9.26481
90.88	-9.26481
90.98	-9.25777
91.08	-9.24996
91.18	-9.2609
91.28	-9.24918
91.38	-9.25621
91.48	-9.25309
91.58	-9.24606
91.68	-9.25465
91.78	-9.24996
91.88	-9.23434
91.98	-9.24137
92.08	-9.23746
92.18	-9.24215
92.28	-9.2359
92.38	-9.2359
92.48	-9.2359
92.58	-9.23356
92.68	-9.22653
92.78	-9.22262
92.88	-9.20621
92.98	-9.21403
93.08	-9.20699
93.18	-9.21246
93.28	-9.20465
93.38	-9.22575
93.48	-9.21637
93.58	-9.22262
93.68	-9.21481
93.78	-9.21169
93.88	-9.20465
93.98	-9.2109
94.08	-9.22184
94.18	-9.20699
94.28	-9.2109
94.38	-9.22184
94.48	-9.21793
94.58	-9.22575
94.68	-9.22496
94.78	-9.21637
94.88	-9.21246
94.98	-9.21246
95.08	-9.20465
95.18	-9.20231
95.28	-9.20465
95.38	-9.20152
95.48	-9.20387
95.58	-9.20231
95.68	-9.19371
95.78	-9.20465
95.88	-9.19293
95.98	-9.18825
96.08	-9.20309
96.18	-9.19293
96.28	-9.19293
96.38	-9.18512
96.48	-9.18512
96.58	-9.16402
96.68	-9.16168
96.78	-9.15934
96.88	-9.16168
96.98	-9.16012
97.08	-9.14371
97.18	-9.15153
97.28	-9.14293
97.38	-9.14215
97.48	-9.15153
97.58	-9.14762
97.68	-9.1234
97.78	-9.132
97.88	-9.14059
97.98	-9.14371
98.08	-9.12809
98.18	-9.12653
98.28	-9.12106
98.38	-9.11481
98.48	-9.11481
98.58	-9.12106
98.68	-9.11246
98.78	-9.11246
98.88	-9.11168
98.98	-9.10231
99.08	-9.10309
99.18	-9.11246
99.28	-9.11168
99.38	-9.1109
99.48	-9.11403
99.58	-9.10387
99.68	-9.11246
99.78	-9.09371
99.88	-9.09137
99.98	-9.09137
100.08	-9.09137
100.18	-9.09762
100.28	-9.09293
100.38	-9.08356
100.48	-9.08356
100.58	-9.08356
100.68	-9.08669
100.78	-9.08434
100.88	-9.08356
100.98	-9.07731
101.08	-9.0734
101.18	-9.07418
101.28	-9.06637
101.38	-9.0734
101.48	-9.07262
101.58	-9.07497
101.68	-9.07574
101.78	-9.07574
101.88	-9.0609
101.98	-9.0695
102.08	-9.06403
102.18	-9.0734
102.28	-9.0695
102.38	-9.07418
102.48	-9.07574
102.58	-9.06637
102.68	-9.0734
102.78	-9.08356
102.88	-9.08356
102.98	-9.09293
103.08	-9.0859
103.18	-9.07184
103.28	-9.07809
103.38	-9.07497
103.48	-9.06793
103.58	-9.07418
103.68	-9.06637
103.78	-9.05544
103.88	-9.05465
103.98	-9.04449
104.08	-9.04059
104.18	-9.03278
104.28	-9.04215
104.38	-9.02731
104.48	-9.03902
104.58	-9.04372
104.68	-9.0484
104.78	-9.04293
104.88	-9.03278
104.98	-9.03278
105.08	-9.04215
105.18	-9.05074
105.28	-9.06403
105.38	-9.06402
105.48	-9.04449
105.58	-9.06168
105.68	-9.06793
105.78	-9.06403
105.88	-9.06559
105.98	-9.07262
106.08	-9.09293
106.18	-9.10309
106.28	-9.12418
106.38	-9.11715
106.48	-9.10309
106.58	-9.1109
106.68	-9.10309
106.78	-9.10309
106.88	-9.12262
106.98	-9.11481
107.08	-9.09371
107.18	-9.09137
107.28	-9.08512
107.38	-9.07184
107.48	-9.08512
107.58	-9.08433
107.68	-9.06559
107.78	-9.06402
107.88	-9.05231
107.98	-9.0734
108.08	-9.05621
108.18	-9.0445
108.28	-9.04449
108.38	-9.0484
108.48	-9.0273
108.58	-9.02496
108.68	-9.007
108.78	-8.97652
108.88	-8.9859
108.98	-8.98043
109.08	-8.97262
109.18	-8.97731
109.28	-8.9859
109.38	-8.97106
109.48	-8.97027
109.58	-8.9734
109.68	-8.97653
109.78	-8.96793
109.88	-8.96247
109.98	-8.9609
110.08	-8.92731
110.18	-8.93278
110.28	-8.95152
110.38	-8.9445
110.48	-8.93512
110.58	-8.94293
110.68	-8.94293
110.78	-8.94293
110.88	-8.95465
110.98	-8.94293
111.08	-8.93355
111.18	-8.95387
111.28	-8.94371
111.38	-8.94216
111.48	-8.94527
111.58	-8.94684
111.68	-8.94137
111.78	-8.93278
111.88	-8.9484
111.98	-8.93746
112.08	-8.93746
112.18	-8.95231
112.28	-8.95699
112.38	-8.96559
112.48	-8.96324
112.58	-8.96246
112.68	-8.97731
112.78	-8.97652
112.88	-8.99215
112.98	-8.99371
113.08	-8.99137
113.18	-8.99918
113.28	-8.98277
113.38	-9.00153
113.48	-8.98434
113.58	-8.99684
113.68	-8.9859
113.78	-8.99058
113.88	-8.99294
113.98	-8.9859
114.08	-8.9859
114.18	-8.982
114.28	-8.99371
114.38	-8.99762
114.48	-8.99137
114.58	-8.9859
114.68	-8.98277
114.78	-8.97418
114.88	-8.97575
114.98	-8.97652
115.08	-8.98356
115.18	-8.9859
115.28	-8.97887
115.38	-8.99371
115.48	-8.98746
115.58	-8.99371
115.68	-8.97262
115.78	-8.96403
115.88	-8.97184
115.98	-8.97418
116.08	-8.9648
116.18	-8.9484
116.28	-8.96637
116.38	-8.95152
116.48	-8.96246
116.58	-8.97418
116.68	-8.97731
116.78	-8.9648
116.88	-8.97184
116.98	-8.97652
117.08	-8.98043
117.18	-8.99371
117.28	-8.98746
117.38	-8.982
117.48	-8.99605
117.58	-8.98746
117.68	-8.98434
117.78	-8.98356
117.88	-8.9859
117.98	-8.9859
118.08	-8.98199
118.18	-8.97028
118.28	-8.99215
118.38	-8.99371
118.48	-8.99918
118.58	-9.00543
118.68	-8.98277
118.78	-8.99528
118.88	-8.982
118.98	-8.95309
119.08	-8.97184
119.18	-8.97184
119.28	-9.06636
119.38	-8.95232
119.48	-8.95075
119.58	-9.34129
119.68	-11.5625
119.78	-13.6342
119.88	-14.0415
119.98	-13.8399
120.08	-8.28933
120.18	-2.05904
120.28	-0.64297
120.38	-0.97649
120.48	-1.52341
120.58	-1.98044
120.68	-2.07574
120.78	-2.36559
120.88	-2.50465
120.98	-2.60779
121.08	-2.54372
121.18	-2.57418
121.28	-2.49606
121.38	-2.47495
121.48	-2.41324
121.58	-2.30465
121.68	-2.15387
121.78	-2.06403
121.88	-2.02887
121.98	-1.86325
122.08	-1.77497
122.18	-1.49839
122.28	-1.34059
122.38	-1.21324
122.48	-1.02652
122.58	-0.86715
122.68	-0.80308
122.78	-0.73902
122.88	-0.6195
122.98	-0.47183
123.08	-0.39136
123.18	-0.36169
123.28	-0.14215
123.38	0.075032
123.48	0.172689
123.58	0.207844
123.68	0.274257
123.78	0.430502
123.88	0.512537
123.98	0.594563
124.08	0.662536
124.18	0.714105
124.28	0.77582
124.38	0.887533
124.48	0.993006
124.58	1.03988
124.68	1.07113
124.78	1.12973
124.88	1.22269
124.98	1.28988
125.08	1.3016
125.18	1.36253
125.28	1.39457
125.38	1.46175
125.48	1.48441
125.58	1.50707
125.68	1.56878
125.78	1.60629
125.88	1.63519
125.98	1.6516
126.08	1.69301
126.18	1.70785
126.28	1.72895
126.38	1.78206
126.48	1.79379
126.58	1.84379
126.68	1.87581
126.78	1.89144
126.88	1.91644
126.98	1.95004
127.08	1.96879
127.18	1.99066
127.28	2.00082
127.38	2.03129
127.48	2.03207
127.58	2.06254
127.68	2.07347
127.78	2.10394
127.88	2.10785
127.98	2.14926
128.08	2.14926
128.18	2.16253
128.28	2.18988
128.38	2.23051
128.48	2.27972
128.58	2.27504
128.68	2.27581
128.78	2.2641
128.88	2.25082
128.98	2.27348
129.08	2.33832
129.18	2.35004
129.28	2.37582
129.38	2.7016
129.48	2.70392
129.58	2.59298
129.68	2.3938
129.78	2.79535
129.88	3.30785
129.98	2.29213
130.08	1.13692
130.18	2.15769
130.28	2.40082
130.38	2.43363
130.48	2.36096
130.58	2.36331
130.68	2.29223
130.78	2.23519
130.88	2.40942
130.98	2.47738
131.08	2.47504
131.18	2.50785
131.28	2.52972
131.38	2.56722
131.48	2.55082
131.58	2.57894
131.68	2.57504
131.78	2.58832
131.88	2.60394
131.98	2.67034
132.08	2.66019
132.18	2.65707
132.28	2.65082
132.38	2.65082
132.48	2.63206
132.58	2.61566
132.68	2.62894
132.78	2.63519
132.88	2.63754
132.98	2.64301
133.08	2.68911
133.18	2.76409
133.28	3.568
133.38	2.41723
133.48	2.45558
133.58	2.17201
133.68	2.49056
133.78	2.66957
133.88	2.65707
133.98	2.64533
134.08	2.72032
134.18	2.67115
134.28	2.62112
134.38	2.61019
134.48	2.57503
134.58	2.66643
134.68	2.68755
134.78	2.6641
134.88	2.66175
134.98	2.64691
135.08	2.63285
135.18	2.66097
135.28	2.64066
135.38	2.62816
135.48	2.62894
135.58	2.63753
135.68	2.64457
135.78	2.69144
135.88	2.68597
135.98	2.70003
136.08	2.71488
136.18	2.73519
136.28	2.70394
136.38	2.69144
136.48	2.66878
136.58	2.64144
136.68	2.64535
136.78	2.64848
136.88	2.66644
136.98	2.67972
137.08	2.66488
137.18	2.68363
137.28	2.72347
137.38	2.73832
137.48	2.718
137.58	2.71879
137.68	2.72113
137.78	2.71957
137.88	2.71332
137.98	2.71879
138.08	2.71332
138.18	2.70551
138.28	2.71332
138.38	2.68441
138.48	2.67269
138.58	2.65082
138.68	2.67582
138.78	2.7016
138.88	2.72347
138.98	2.74223
139.08	2.77191
139.18	2.79535
139.28	2.79144
139.38	2.77972
139.48	2.77035
139.58	2.76019
139.68	2.75238
139.78	2.73129
[truncated: 17,544 more rows]

## Sheet: Figure 2-figure supplement 1G
Time	Data
-60.08	-0.05045
-59.98	-0.06216
-59.88	-0.05045
-59.78	-0.06451
-59.68	-0.06216
-59.58	-0.06372
-59.48	-0.07077
-59.38	-0.06372
-59.28	-0.06763
-59.18	-0.05124
-59.08	-0.052
-58.98	-0.05435
-58.88	-0.04263
-58.78	-0.04965
-58.68	-0.04733
-58.58	-0.04028
-58.48	-0.03326
-58.38	-0.04263
-58.28	-0.03091
-58.18	-0.03091
-58.08	-0.04419
-57.98	-0.04889
-57.88	-0.03638
-57.78	-0.03091
-57.68	-0.02936
-57.58	-0.03326
-57.48	-0.03012
-57.38	-0.02936
-57.28	-0.0231
-57.18	-0.01138
-57.08	-0.01294
-56.98	-0.00592
-56.88	-0.02155
-56.78	-0.0145
-56.68	-0.02545
-56.58	-0.04028
-56.48	-0.0192
-56.38	-0.03326
-56.28	-0.03247
-56.18	-0.02936
-56.08	-0.01138
-55.98	-0.0231
-55.88	-0.02075
-55.78	-0.00592
-55.68	-0.00357
-55.58	-0.00122
-55.48	0.012054
-55.38	-0.01373
-55.28	-0.02075
-55.18	-0.02936
-55.08	-0.06998
-54.98	-0.08169
-54.88	-0.0817
-54.78	-0.07388
-54.68	-0.07388
-54.58	-0.05591
-54.48	-0.02701
-54.38	0.021423
-54.28	0.016755
-54.18	0.023773
-54.08	0.039398
-53.98	0.043305
-53.88	0.05658
-53.78	0.047211
-53.68	0.047211
-53.58	0.044861
-53.48	0.033936
-53.38	0.030029
-53.28	0.040955
-53.18	0.039398
-53.08	-0.00513
-52.98	-0.00202
-52.88	0.018311
-52.78	-0.00983
-52.68	-0.03326
-52.58	-0.04575
-52.48	-0.0567
-52.38	-0.05435
-52.28	-0.06607
-52.18	-0.05045
-52.08	-0.03091
-51.98	0.031586
-51.88	0.02298
-51.78	-0.24112
-51.68	-0.63794
-51.58	0.308929
-51.48	0.063641
-51.38	0.151886
-51.28	-0.01919
-51.18	-0.00436
-51.08	0.055817
-50.98	0.070642
-50.88	0.115189
-50.78	-0.04187
-50.68	-0.21216
-50.58	-0.20825
-50.48	-0.07311
-50.38	-0.01997
-50.28	-0.02701
-50.18	-0.03247
-50.08	0.00815
-49.98	0.015961
-49.88	0.024551
-49.78	0.044861
-49.68	0.049561
-49.58	0.068298
-49.48	0.053467
-49.38	0.058136
-49.28	0.08081
-49.18	0.076111
-49.08	0.065186
-48.98	0.061279
-48.88	0.069855
-48.78	0.076904
-48.68	0.076111
-48.58	0.069092
-48.48	0.072205
-48.38	0.076904
-48.28	0.088624
-48.18	0.089401
-48.08	0.088623
-47.98	0.109711
-47.88	0.105804
-47.78	0.109711
-47.68	0.097992
-47.58	0.105804
-47.48	0.096435
-47.38	0.074554
-47.28	0.060485
-47.18	0.037048
-47.08	0.023773
-46.98	0.026123
-46.88	0.00735
-46.78	0.00504
-46.68	0.012054
-46.58	0.012054
-46.48	0.047211
-46.38	0.049561
-46.28	0.058136
-46.18	0.033936
-46.08	0.023773
-45.98	-0.00357
-45.88	-0.00592
-45.78	-0.04654
-45.68	-0.06216
-45.58	-0.052
-45.48	-0.07077
-45.38	-0.06216
-45.28	-0.06372
-45.18	-0.03638
-45.08	-0.01138
-44.98	0.018311
-44.88	0.019074
-44.78	-0.00122
-44.68	0.0058
-44.58	-0.00357
-44.48	-0.00278
-44.38	-0.00592
-44.28	-0.00357
-44.18	-0.01138
-44.08	-0.00983
-43.98	-0.01685
-43.88	-0.01138
-43.78	-0.01764
-43.68	-0.00903
-43.58	-0.00983
-43.48	-0.00513
-43.38	-0.01529
-43.28	-0.01764
-43.18	-0.02466
-43.08	-0.0192
-42.98	-0.02075
-42.88	-0.01764
-42.78	-0.00357
-42.68	-0.01138
-42.58	-0.00201
-42.48	-0.02231
-42.38	-0.01373
-42.28	-0.01138
-42.18	-0.01138
-42.08	-0.00592
-41.98	-0.0231
-41.88	-0.01138
-41.78	-0.0231
-41.68	-0.01529
-41.58	-0.04263
-41.48	-0.03638
-41.38	-0.04889
-41.28	-0.04419
-41.18	-0.03717
-41.08	-0.03482
-40.98	-0.04028
-40.88	-0.02936
-40.78	-0.01138
-40.68	-0.02545
-40.58	-0.02466
-40.48	-0.01529
-40.38	-0.00592
-40.28	-0.02466
-40.18	-0.04028
-40.08	-0.02155
-39.98	-0.04263
-39.88	-0.04028
-39.78	-0.0192
-39.68	-0.01138
-39.58	-0.0192
-39.48	-0.02155
-39.38	-0.02075
-39.28	-0.02936
-39.18	-0.0231
-39.08	-0.01138
-38.98	-0.01529
-38.88	-0.01294
-38.78	0.00815
-38.68	-0.00201
-38.58	-0.01294
-38.48	-0.01138
-38.38	-0.01138
-38.28	-0.01138
-38.18	-0.01138
-38.08	-0.00748
-37.98	-0.00748
-37.88	-0.01373
-37.78	-0.0231
-37.68	-0.02545
-37.58	-0.04419
-37.48	-0.03482
-37.38	-0.02155
-37.28	-0.04028
-37.18	-0.0231
-37.08	-0.03482
-36.98	-0.03012
-36.88	-0.0278
-36.78	-0.04263
-36.68	-0.03482
-36.58	-0.04498
-36.48	-0.04184
-36.38	-0.04108
-36.28	-0.0528
-36.18	-0.0481
-36.08	-0.04889
-35.98	-0.04263
-35.88	-0.05356
-35.78	-0.05124
-35.68	-0.04965
-35.58	-0.05905
-35.48	-0.06137
-35.38	-0.06061
-35.28	-0.06216
-35.18	-0.05045
-35.08	-0.06216
-34.98	-0.06216
-34.88	-0.06216
-34.78	-0.06372
-34.68	-0.0567
-34.58	-0.06216
-34.48	-0.05981
-34.38	-0.04108
-34.28	-0.05981
-34.18	-0.05045
-34.08	-0.04889
-33.98	-0.0481
-33.88	-0.0528
-33.78	-0.07153
-33.68	-0.07077
-33.58	-0.08325
-33.48	-0.06137
-33.38	-0.06686
-33.28	-0.06842
-33.18	-0.05356
-33.08	-0.06061
-32.98	-0.052
-32.88	-0.05905
-32.78	-0.07153
-32.68	-0.05591
-32.58	-0.06216
-32.48	-0.06061
-32.38	-0.0567
-32.28	-0.05746
-32.18	-0.06061
-32.08	-0.04184
-31.98	-0.05124
-31.88	-0.05356
-31.78	-0.03952
-31.68	-0.04184
-31.58	-0.04108
-31.48	-0.04889
-31.38	-0.03482
-31.28	-0.03482
-31.18	-0.03247
-31.08	-0.03326
-30.98	-0.02856
-30.88	-0.03326
-30.78	-0.03247
-30.68	-0.0231
-30.58	-0.01138
-30.48	-0.01218
-30.38	-0.0145
-30.28	-0.00201
-30.18	-0.00357
-30.08	0.00659
-29.98	0.00269
-29.88	0.02298
-29.78	0.014404
-29.68	0.00815
-29.58	0.019867
-29.48	0.00815
-29.38	0.00815
-29.28	0.0058
-29.18	-0.00357
-29.08	0.010498
-28.98	0.00815
-28.88	-0.00201
-28.78	-0.00122
-28.68	0.00659
-28.58	-0.01218
-28.48	-0.00357
-28.38	-0.00278
-28.28	-0.000458
-28.18	0.000336
-28.08	0.0097
-27.98	0.00504
-27.88	0.0058
-27.78	0.00894
-27.68	0.013611
-27.58	0.017517
-27.48	0.010498
-27.38	0.019867
-27.28	0.019867
-27.18	0.027679
-27.08	0.026886
-26.98	0.014405
-26.88	0.022217
-26.78	0.021424
-26.68	0.026123
-26.58	0.010498
-26.48	0.026886
-26.38	0.024567
-26.28	0.019074
-26.18	0.027679
-26.08	0.028473
-25.98	0.019074
-25.88	0.027679
-25.78	0.02768
-25.68	0.035492
-25.58	0.036285
-25.48	0.030793
-25.38	0.037842
-25.28	0.017517
-25.18	0.018311
-25.08	0.027679
-24.98	0.013611
-24.88	0.00659
-24.78	0.019867
-24.68	0.019867
-24.58	0.017517
-24.48	-0.00357
-24.38	-0.00122
-24.28	0.00815
-24.18	0.00815
-24.08	0.00815
-23.98	-0.00592
-23.88	-0.00122
-23.78	0.0097
-23.68	0.00659
-23.58	0.000336
-23.48	0.00735
-23.38	0.00504
-23.28	0.0058
-23.18	-0.01138
-23.08	-0.00903
-22.98	0.0097
-22.88	0.000336
-22.78	-0.01059
-22.68	-0.000458
-22.58	-0.00513
-22.48	-0.0231
-22.38	-0.00983
-22.28	-0.00357
-22.18	0.00424
-22.08	-0.00513
-21.98	-0.00983
-21.88	0.00815
-21.78	0.00659
-21.68	-0.00983
-21.58	-0.01138
-21.48	-0.00278
-21.38	0.00189
-21.28	0.0058
-21.18	-0.00357
-21.08	0.00659
-20.98	-0.00201
-20.88	-0.00357
-20.78	-0.00357
-20.68	-0.00592
-20.58	-0.01529
-20.48	0.00113
-20.38	0.027679
-20.28	0.019867
-20.18	0.019867
-20.08	0.019867
-19.98	0.010498
-19.88	0.019867
-19.78	0.011261
-19.68	0.019867
-19.58	0.010498
-19.48	0.019867
-19.38	0.00815
-19.28	0.00735
-19.18	0.00424
-19.08	0.00659
-18.98	0.014404
-18.88	0.00815
-18.78	0.021423
-18.68	0.015961
-18.58	0.026123
-18.48	0.035492
-18.38	0.027679
-18.28	0.044098
-18.18	0.062836
-18.08	0.060486
-17.98	0.039399
-17.88	0.040955
-17.78	0.060487
-17.68	0.075348
-17.58	0.080017
-17.48	0.084717
-17.38	0.068298
-17.28	0.056579
-17.18	0.049561
-17.08	0.05658
-16.98	0.051117
-16.88	0.062836
-16.78	0.063629
-16.68	0.058929
-16.58	0.057373
-16.48	0.047989
-16.38	0.047211
-16.28	0.033936
-16.18	0.030029
-16.08	0.030792
-15.98	0.036271
-15.88	0.037048
-15.78	0.029236
-15.68	0.028473
-15.58	0.026886
-15.48	0.023774
-15.38	0.015961
-15.28	0.010498
-15.18	0.015961
-15.08	0.014404
-14.98	0.0097
-14.88	0.00815
-14.78	0.022217
-14.68	0.019867
-14.58	0.019867
-14.48	0.017516
-14.38	-0.00357
-14.28	0.00424
-14.18	-0.00357
-14.08	-0.00513
-13.98	-0.01138
-13.88	-0.00983
-13.78	-0.00357
-13.68	-0.00357
-13.58	0.00815
-13.48	-0.00122
-13.38	0.017517
-13.28	0.000336
-13.18	0.00189
-13.08	0.014404
-12.98	-0.00357
-12.88	-0.00357
-12.78	-0.00983
-12.68	0.00815
-12.58	0.010498
-12.48	0.0058
-12.38	-0.00357
-12.28	0.00424
-12.18	0.00659
-12.08	0.00815
-11.98	0.00815
-11.88	0.010498
-11.78	0.00815
-11.68	0.00815
-11.58	0.00815
-11.48	-0.00357
-11.38	0.000336
-11.28	0.000336
-11.18	0.000336
-11.08	0.000336
-10.98	-0.01138
-10.88	-0.0192
-10.78	-0.01138
-10.68	-0.01138
-10.58	-0.01138
-10.48	-0.01138
-10.38	-0.02545
-10.28	-0.04108
-10.18	-0.03482
-10.08	-0.03482
-9.98	-0.03482
-9.88	-0.0231
-9.78	-0.03482
-9.68	-0.03482
-9.58	-0.03247
-9.48	-0.02545
-9.38	-0.04419
-9.28	-0.03482
-9.18	-0.03091
-9.08	-0.03091
-8.98	-0.03247
-8.88	-0.02545
-8.78	-0.03482
-8.68	-0.04263
-8.58	-0.04419
-8.48	-0.04889
-8.38	-0.05435
-8.28	-0.05591
-8.18	-0.06998
-8.08	-0.06842
-7.98	-0.06451
-7.88	-0.07388
-7.78	-0.05435
-7.68	-0.05435
-7.58	-0.03638
-7.48	-0.07233
-7.38	-0.18091
-7.28	-0.1325
-7.18	-0.17545
-7.08	-0.10513
-6.98	0.021422
-6.88	-0.07935
-6.78	-0.03403
-6.68	-0.06529
-6.58	-0.07388
-6.48	-0.1067
-6.38	-0.0856
-6.28	0.052684
-6.18	0.245651
-6.08	0.117523
-5.98	0.222963
-5.88	0.562057
-5.78	0.337843
-5.68	0.227676
-5.58	0.027679
-5.48	0.040176
-5.38	0.074554
-5.28	0.064409
-5.18	0.078461
-5.08	0.080017
-4.98	0.092531
-4.88	0.076126
-4.78	0.065187
-4.68	0.056595
-4.58	0.040192
-4.48	0.051118
-4.38	0.048767
-4.28	0.042512
-4.18	0.026108
-4.08	-0.01373
-3.98	-0.0231
-3.88	-0.01294
-3.78	0.027681
-3.68	0.037064
-3.58	0.048004
-3.48	0.090181
-3.38	0.095642
-3.28	0.088625
-3.18	0.115189
-3.08	0.129242
-2.98	0.119081
-2.88	0.115967
-2.78	0.112063
-2.68	0.13472
-2.58	0.141754
-2.48	0.198778
-2.38	0.201904
-2.28	0.233154
-2.18	0.337051
-2.08	0.433136
-1.98	0.330799
-1.88	0.302689
-1.78	0.265955
-1.68	0.273773
-1.58	0.268295
-1.48	0.275327
-1.38	0.284698
-1.28	0.145651
-1.18	0.13472
-1.08	0.042526
-0.98	0.084723
-0.88	0.138626
-0.78	0.05347
-0.68	-0.02077
-0.58	-0.11919
-0.48	-0.16841
-0.38	-0.22154
-0.28	0.176102
-0.18	1.673
-0.08	4.31831
0.020001	5.99946
0.119999	6.52924
0.220001	3.53712
0.32	-2.96451
0.419998	-5.252
0.52	-5.46217
0.619999	-5.28249
0.720001	-5.09031
0.82	-4.87231
0.919998	-4.66528
1.02	-4.58561
1.12	-4.4317
1.22	-4.40826
1.32	-4.50279
1.42	-4.57466
1.52	-4.67935
1.62	-4.78952
1.72	-4.90201
1.82	-5.04419
1.92	-5.23404
2.02	-5.44498
2.12	-5.68953
2.22	-5.97701
2.32	-6.17389
2.42	-6.3692
2.52	-6.62154
2.62	-6.8739
2.72	-7.14107
2.82	-7.39108
2.92	-7.64107
3.02	-7.86919
3.12	-8.13249
3.22	-8.39497
3.32	-8.64107
3.42	-8.87857
3.52	-9.11372
3.62	-9.34342
3.72	-9.57076
3.82	-9.74889
3.92	-9.99342
4.02	-10.1989
4.12	-10.4067
4.22	-10.5793
4.32	-10.7606
4.42	-10.9661
4.52	-11.1481
4.62	-11.3325
4.72	-11.4958
4.82	-11.638
4.92	-11.8059
5.02	-11.9817
5.12	-12.1301
5.22	-12.277
5.32	-12.4559
5.42	-12.6129
5.52	-12.7903
5.62	-12.9333
5.72	-13.0692
5.82	-13.2208
5.92	-13.345
6.02	-13.5012
6.12	-13.6184
6.22	-13.7317
6.32	-13.8669
6.42	-13.97
6.52	-14.0911
6.62	-14.1872
6.72	-14.3176
6.82	-14.4294
6.92	-14.5208
7.02	-14.6442
7.12	-14.7614
7.22	-14.8723
7.32	-14.984
7.42	-15.0754
7.52	-15.1715
7.62	-15.2567
7.72	-15.3372
7.82	-15.4098
7.92	-15.484
8.02	-15.5872
8.12	-15.6614
8.22	-15.7403
8.32	-15.8153
8.42	-15.9044
8.52	-15.995
8.62	-16.0645
8.72	-16.1418
8.82	-16.2106
8.92	-16.3036
9.02	-16.3754
9.12	-16.4731
9.22	-16.5137
9.32	-16.5504
9.42	-16.5731
9.52	-16.6208
9.62	-16.6497
9.72	-16.6872
9.82	-16.752
9.92	-16.8153
10.02	-16.8551
10.12	-16.9036
10.22	-16.9333
10.32	-16.97
10.42	-17.0192
10.52	-17.1036
10.62	-17.1551
10.72	-17.1778
10.82	-17.2551
10.92	-17.277
11.02	-17.3083
11.12	-17.3629
11.22	-17.402
11.32	-17.4723
11.42	-17.5051
11.52	-17.5442
11.62	-17.5778
11.72	-17.6301
11.82	-17.6754
11.92	-17.6794
12.02	-17.7083
12.12	-17.7622
12.22	-17.77
12.32	-17.8262
12.42	-17.859
12.52	-17.8848
12.62	-17.8973
12.72	-17.8864
12.82	-17.9231
12.92	-17.9278
13.02	-17.9622
13.12	-17.9372
13.22	-17.9684
13.32	-17.984
13.42	-17.9793
13.52	-17.9919
13.62	-18.0051
13.72	-18.0075
13.82	-18.0387
13.92	-18.0661
14.02	-18.1184
14.12	-18.1559
14.22	-18.1895
14.32	-18.2278
14.42	-18.2497
14.52	-18.2833
14.62	-18.3012
14.72	-18.3403
14.82	-18.3919
14.92	-18.4372
15.02	-18.4583
15.12	-18.4731
15.22	-18.4833
15.32	-18.5387
15.42	-18.5387
15.52	-18.5661
15.62	-18.5778
15.72	-18.6262
15.82	-18.6262
15.92	-18.6481
16.02	-18.6754
16.12	-18.7223
16.22	-18.7286
16.32	-18.7747
16.42	-18.7958
16.52	-18.8083
16.62	-18.8262
16.72	-18.8879
16.82	-18.8958
16.92	-18.9395
17.02	-18.9754
17.12	-19.0278
17.22	-19.0465
17.32	-19.0872
17.42	-19.1106
17.52	-19.1442
17.62	-19.1575
17.72	-19.1848
17.82	-19.1895
17.92	-19.2067
18.02	-19.2262
18.12	-19.2575
18.22	-19.2887
18.32	-19.3083
18.42	-19.3395
18.52	-19.3372
18.62	-19.3497
18.72	-19.4012
18.82	-19.4372
18.92	-19.4684
19.02	-19.4981
19.12	-19.5364
19.22	-19.5481
19.32	-19.5661
19.42	-19.6012
19.52	-19.6442
19.62	-19.677
19.72	-19.6911
19.82	-19.7083
19.92	-19.7317
20.02	-19.7661
20.12	-19.7786
20.22	-19.7887
20.32	-19.82
20.42	-19.8708
20.52	-19.8801
20.62	-19.8817
20.72	-19.8981
20.82	-19.927
20.92	-19.9669
21.02	-19.9879
21.12	-19.9997
21.22	-20.0286
21.32	-20.0411
21.42	-20.0872
21.52	-20.1067
21.62	-20.1403
21.72	-20.1458
21.82	-20.1879
21.92	-20.1997
22.02	-20.213
22.12	-20.2692
22.22	-20.3059
22.32	-20.3473
22.42	-20.3762
22.52	-20.3942
22.62	-20.4215
22.72	-20.4465
22.82	-20.4879
22.92	-20.5489
23.02	-20.5872
23.12	-20.5973
23.22	-20.609
23.32	-20.6497
23.42	-20.6575
23.52	-20.6676
23.62	-20.6872
23.72	-20.7043
23.82	-20.7465
23.92	-20.7684
24.02	-20.7794
24.12	-20.8083
24.22	-20.8606
24.32	-20.8762
24.42	-20.8926
24.52	-20.9098
24.62	-20.9348
24.72	-20.9528
24.82	-20.9911
24.92	-20.9864
25.02	-21.0247
25.12	-21.027
25.22	-21.0622
25.32	-21.1067
25.42	-21.1715
25.52	-21.1872
25.62	-21.209
25.72	-21.2473
25.82	-21.2629
25.92	-21.2637
26.02	-21.2887
26.12	-21.32
26.22	-21.3645
26.32	-21.3786
26.42	-21.3981
26.52	-21.3981
26.62	-21.4286
26.72	-21.4567
26.82	-21.4786
26.92	-21.5208
27.02	-21.5645
27.12	-21.595
27.22	-21.6169
27.32	-21.634
27.42	-21.6583
27.52	-21.6911
27.62	-21.72
27.72	-21.7379
27.82	-21.7575
27.92	-21.7786
28.02	-21.8161
28.12	-21.8473
28.22	-21.8606
28.32	-21.8903
28.42	-21.9254
28.52	-21.9294
28.62	-21.9317
28.72	-21.9505
28.82	-21.9825
28.92	-22.0208
29.02	-22.07
29.12	-22.0887
29.22	-22.0973
29.32	-22.127
29.42	-22.1379
29.52	-22.1403
29.62	-22.1739
29.72	-22.1989
29.82	-22.2278
29.92	-22.2379
30.02	-22.2684
30.12	-22.2754
30.22	-22.3059
30.32	-22.3168
30.42	-22.3403
30.52	-22.3614
30.62	-22.3786
30.72	-22.3981
30.82	-22.409
30.92	-22.4395
31.02	-22.4684
31.12	-22.4684
31.22	-22.5012
31.32	-22.5372
31.42	-22.5692
31.52	-22.5801
31.62	-22.6161
31.72	-22.6473
31.82	-22.6684
31.92	-22.6856
32.02	-22.7395
32.12	-22.7637
32.22	-22.802
32.32	-22.8239
32.42	-22.8473
32.52	-22.8786
32.62	-22.8958
32.72	-22.92
32.82	-22.927
32.92	-22.9372
33.02	-22.9661
33.12	-22.9567
33.22	-22.9661
33.32	-22.9762
33.42	-22.9778
33.52	-23.0075
33.62	-23.0137
33.72	-23.0208
33.82	-23.0559
33.92	-23.0661
34.02	-23.0856
34.12	-23.0958
34.22	-23.1028
34.32	-23.127
34.42	-23.1715
34.52	-23.2004
34.62	-23.2184
34.72	-23.2372
34.82	-23.2379
34.92	-23.2598
35.02	-23.2872
35.12	-23.3137
35.22	-23.2957
35.32	-23.3356
35.42	-23.3356
35.52	-23.3692
35.62	-23.3903
35.72	-23.4137
35.82	-23.4567
35.92	-23.459
36.02	-23.4817
36.12	-23.4934
36.22	-23.4934
36.32	-23.4856
36.42	-23.4926
36.52	-23.5325
36.62	-23.552
36.72	-23.5473
36.82	-23.5715
36.92	-23.577
37.02	-23.5864
37.12	-23.6028
37.22	-23.6129
37.32	-23.6653
37.42	-23.6762
37.52	-23.6809
37.62	-23.7059
37.72	-23.7286
37.82	-23.7403
37.92	-23.7739
38.02	-23.8051
38.12	-23.8215
38.22	-23.838
38.32	-23.8551
38.42	-23.8504
38.52	-23.8473
38.62	-23.8692
38.72	-23.8942
38.82	-23.9098
38.92	-23.9286
39.02	-23.9395
39.12	-23.9583
39.22	-23.9497
39.32	-23.9715
39.42	-23.9684
39.52	-23.9895
39.62	-24.0161
39.72	-24.0325
39.82	-24.0403
39.92	-24.0661
40.02	-24.0684
40.12	-24.0887
40.22	-24.1075
40.32	-24.1309
40.42	-24.134
40.52	-24.1614
40.62	-24.1559
40.72	-24.1692
40.82	-24.1856
40.92	-24.2004
41.02	-24.1934
41.12	-24.1911
41.22	-24.1934
41.32	-24.2122
41.42	-24.2317
41.52	-24.252
41.62	-24.2708
41.72	-24.2887
41.82	-24.2903
41.92	-24.3004
42.02	-24.3122
42.12	-24.3669
42.22	-24.3825
42.32	-24.4309
42.42	-24.4356
42.52	-24.4465
42.62	-24.4762
42.72	-24.4864
42.82	-24.5012
42.92	-24.5192
43.02	-24.5294
43.12	-24.5379
43.22	-24.5622
43.32	-24.5606
43.42	-24.5919
43.52	-24.6004
43.62	-24.6192
43.72	-24.6106
43.82	-24.6208
43.92	-24.6208
44.02	-24.6301
44.12	-24.6505
44.22	-24.6614
44.32	-24.6622
44.42	-24.6809
44.52	-24.6872
44.62	-24.695
44.72	-24.7208
44.82	-24.7528
44.92	-24.7653
45.02	-24.7637
45.12	-24.7583
45.22	-24.7676
45.32	-24.777
45.42	-24.7887
45.52	-24.7794
45.62	-24.7903
45.72	-24.7911
45.82	-24.8004
45.92	-24.8153
46.02	-24.8278
46.12	-24.8301
46.22	-24.8309
46.32	-24.8575
46.42	-24.8692
46.52	-24.8645
46.62	-24.8684
46.72	-24.8716
46.82	-24.8801
46.92	-24.8669
47.02	-24.8708
47.12	-24.8801
47.22	-24.8903
47.32	-24.8997
47.42	-24.8872
47.52	-24.9137
47.62	-24.9309
47.72	-24.9372
47.82	-24.9333
47.92	-24.9583
48.02	-24.9614
48.12	-24.9817
48.22	-24.9895
48.32	-24.9997
48.42	-25.0075
48.52	-25.0114
48.62	-25.0098
48.72	-25.0231
48.82	-25.0403
48.92	-25.0426
49.02	-25.0622
49.12	-25.0684
49.22	-25.0833
49.32	-25.0872
49.42	-25.0872
49.52	-25.0903
49.62	-25.1012
49.72	-25.1106
49.82	-25.109
49.92	-25.0958
50.02	-25.1223
50.12	-25.1208
50.22	-25.1286
50.32	-25.1247
50.42	-25.1426
50.52	-25.1731
50.62	-25.1715
50.72	-25.1809
50.82	-25.1934
50.92	-25.2122
51.02	-25.2169
51.12	-25.2223
51.22	-25.2395
51.32	-25.2598
51.42	-25.2645
51.52	-25.2653
51.62	-25.2598
51.72	-25.2864
51.82	-25.2989
51.92	-25.3122
52.02	-25.3293
52.12	-25.3286
52.22	-25.3411
52.32	-25.3489
52.42	-25.3629
52.52	-25.3747
52.62	-25.3809
52.72	-25.3981
52.82	-25.3997
52.92	-25.4137
53.02	-25.4294
53.12	-25.4512
53.22	-25.4504
53.32	-25.4708
53.42	-25.4715
53.52	-25.4926
53.62	-25.5208
53.72	-25.5168
53.82	-25.5239
53.92	-25.5403
54.02	-25.5411
54.12	-25.5536
54.22	-25.5684
54.32	-25.5715
54.42	-25.5676
54.52	-25.5669
54.62	-25.5833
54.72	-25.5934
54.82	-25.6067
54.92	-25.6192
55.02	-25.6184
55.12	-25.627
55.22	-25.6442
55.32	-25.6418
55.42	-25.6505
55.52	-25.6442
55.62	-25.6676
55.72	-25.6614
55.82	-25.6637
55.92	-25.6809
56.02	-25.6794
56.12	-25.7012
56.22	-25.7122
56.32	-25.709
56.42	-25.72
56.52	-25.7208
56.62	-25.7215
56.72	-25.7364
56.82	-25.7379
56.92	-25.7395
57.02	-25.7598
57.12	-25.759
57.22	-25.7598
57.32	-25.7731
57.42	-25.7794
57.52	-25.7848
57.62	-25.784
57.72	-25.7887
57.82	-25.7926
57.92	-25.8083
58.02	-25.7981
58.12	-25.7872
58.22	-25.802
58.32	-25.7911
58.42	-25.8044
58.52	-25.8239
58.62	-25.8215
58.72	-25.8161
58.82	-25.8122
58.92	-25.8106
59.02	-25.8215
59.12	-25.8395
59.22	-25.8231
59.32	-25.8497
59.42	-25.8567
59.52	-25.8794
59.62	-25.8864
59.72	-25.8918
59.82	-25.8942
59.92	-25.8973
60.02	-25.8989
60.12	-25.8997
60.22	-25.9005
60.32	-25.9098
60.42	-25.92
60.52	-25.9309
60.62	-25.945
60.72	-25.9387
60.82	-25.9411
60.92	-25.945
61.02	-25.9317
61.12	-25.9207
61.22	-25.9083
61.32	-25.8997
61.42	-25.8903
61.52	-25.9005
61.62	-25.8723
61.72	-25.8614
61.82	-25.8395
61.92	-25.8333
62.02	-25.8184
62.12	-25.8215
62.22	-25.7903
62.32	-25.7887
62.42	-25.7809
62.52	-25.7989
62.62	-25.7887
62.72	-25.784
62.82	-25.7911
62.92	-25.8004
63.02	-25.7981
63.12	-25.8122
63.22	-25.8106
63.32	-25.8293
63.42	-25.8223
63.52	-25.8333
63.62	-25.845
63.72	-25.852
63.82	-25.8637
63.92	-25.8692
64.02	-25.8786
64.12	-25.8684
64.22	-25.8692
64.32	-25.8669
64.42	-25.8629
64.52	-25.8801
64.62	-25.8809
64.72	-25.8903
64.82	-25.8942
64.92	-25.8997
65.02	-25.9192
65.12	-25.9278
65.22	-25.9473
65.32	-25.9504
65.42	-25.9489
65.52	-25.9348
65.62	-25.9567
65.72	-25.9411
65.82	-25.9372
65.92	-25.9504
66.02	-25.9473
66.12	-25.9504
66.22	-25.959
66.32	-25.9801
66.42	-25.9708
66.52	-25.9653
66.62	-25.9692
66.72	-25.9832
66.82	-25.9786
66.92	-25.9825
67.02	-26.0044
67.12	-25.9887
67.22	-26.009
67.32	-25.9997
67.42	-26.0098
67.52	-26.002
67.62	-26.034
67.72	-26.0465
67.82	-26.0426
67.92	-26.0286
68.02	-26.0317
68.12	-26.052
68.22	-26.0403
68.32	-26.0426
68.42	-26.0606
68.52	-26.0622
68.62	-26.0598
68.72	-26.0708
68.82	-26.1043
68.92	-26.109
69.02	-26.1012
69.12	-26.1192
69.22	-26.1301
69.32	-26.1403
69.42	-26.152
69.52	-26.1505
69.62	-26.1418
69.72	-26.1497
69.82	-26.152
69.92	-26.1504
70.02	-26.1559
70.12	-26.17
70.22	-26.1747
70.32	-26.1895
70.42	-26.1809
70.52	-26.195
70.62	-26.1973
70.72	-26.202
70.82	-26.1973
70.92	-26.2004
71.02	-26.2036
71.12	-26.22
71.22	-26.2215
71.32	-26.2247
71.42	-26.2262
71.52	-26.2083
71.62	-26.209
71.72	-26.2028
71.82	-26.213
71.92	-26.2122
72.02	-26.2004
72.12	-26.1989
72.22	-26.22
72.32	-26.2286
72.42	-26.2184
72.52	-26.2356
72.62	-26.2387
72.72	-26.2512
72.82	-26.2536
72.92	-26.2575
73.02	-26.2614
73.12	-26.2708
73.22	-26.2559
73.32	-26.2614
73.42	-26.2926
73.52	-26.2786
73.62	-26.2887
73.72	-26.3004
73.82	-26.2989
73.92	-26.2957
74.02	-26.2887
74.12	-26.295
74.22	-26.2981
74.32	-26.2887
74.42	-26.3004
74.52	-26.3083
74.62	-26.32
74.72	-26.3254
74.82	-26.3301
74.92	-26.3395
75.02	-26.345
75.12	-26.3473
75.22	-26.3551
75.32	-26.3653
75.42	-26.359
75.52	-26.3614
75.62	-26.3629
75.72	-26.3747
75.82	-26.3825
75.92	-26.3942
76.02	-26.3942
76.12	-26.4137
76.22	-26.4254
76.32	-26.4411
76.42	-26.4411
76.52	-26.445
76.62	-26.4528
76.72	-26.4645
76.82	-26.4606
76.92	-26.4723
77.02	-26.4919
77.12	-26.484
77.22	-26.484
77.32	-26.484
77.42	-26.5036
77.52	-26.5036
77.62	-26.5114
77.72	-26.5129
77.82	-26.527
77.92	-26.5309
78.02	-26.527
78.12	-26.5504
78.22	-26.5504
78.32	-26.5622
78.42	-26.5583
78.52	-26.5622
78.62	-26.5559
78.72	-26.5528
78.82	-26.5606
78.92	-26.5504
79.02	-26.5544
79.12	-26.5504
79.22	-26.5622
79.32	-26.5622
79.42	-26.5622
79.52	-26.5622
79.62	-26.5739
79.72	-26.5622
79.82	-26.57
79.92	-26.5739
80.02	-26.57
80.12	-26.5817
80.22	-26.5817
80.32	-26.5856
80.42	-26.5934
80.52	-26.5872
80.62	-26.5817
80.72	-26.5778
80.82	-26.5817
80.92	-26.5817
81.02	-26.5911
81.12	-26.5778
81.22	-26.5817
81.32	-26.5919
81.42	-26.5973
81.52	-26.6012
81.62	-26.6012
81.72	-26.5989
81.82	-26.6075
81.92	-26.6012
82.02	-26.5997
82.12	-26.5934
82.22	-26.6051
82.32	-26.6169
82.42	-26.6129
82.52	-26.6106
82.62	-26.6106
82.72	-26.609
82.82	-26.609
82.92	-26.6129
83.02	-26.6192
83.12	-26.6208
83.22	-26.6231
83.32	-26.6247
83.42	-26.6325
83.52	-26.6317
83.62	-26.6208
83.72	-26.6286
83.82	-26.6403
83.92	-26.6403
84.02	-26.6372
84.12	-26.6442
84.22	-26.6481
84.32	-26.6559
84.42	-26.6559
84.52	-26.6614
84.62	-26.6559
84.72	-26.6754
84.82	-26.6754
84.92	-26.6692
85.02	-26.6794
85.12	-26.6817
85.22	-26.6809
85.32	-26.6833
85.42	-26.6794
85.52	-26.6833
85.62	-26.7028
85.72	-26.6887
85.82	-26.6989
85.92	-26.7106
86.02	-26.709
86.12	-26.7145
86.22	-26.7106
86.32	-26.72
86.42	-26.7223
86.52	-26.7442
86.62	-26.7512
86.72	-26.7419
86.82	-26.7403
86.92	-26.7481
87.02	-26.7512
87.12	-26.7536
87.22	-26.7614
87.32	-26.7598
87.42	-26.7653
87.52	-26.7653
87.62	-26.7747
87.72	-26.7653
87.82	-26.7747
87.92	-26.7903
88.02	-26.777
88.12	-26.7887
88.22	-26.7911
88.32	-26.7926
88.42	-26.7809
88.52	-26.7903
88.62	-26.7887
88.72	-26.8012
88.82	-26.8059
88.92	-26.8176
89.02	-26.82
89.12	-26.8223
89.22	-26.8512
89.32	-26.8419
89.42	-26.8465
89.52	-26.8395
89.62	-26.8395
89.72	-26.8395
89.82	-26.8497
89.92	-26.8434
90.02	-26.8504
90.12	-26.834
90.22	-26.8419
90.32	-26.8489
90.42	-26.8497
90.52	-26.859
90.62	-26.8723
90.72	-26.877
90.82	-26.8653
90.92	-26.884
91.02	-26.8762
91.12	-26.8926
91.22	-26.9005
91.32	-26.8934
91.42	-26.9044
91.52	-26.8997
91.62	-26.8989
91.72	-26.9036
91.82	-26.9192
91.92	-26.9122
92.02	-26.92
92.12	-26.9153
92.22	-26.9333
92.32	-26.9333
92.42	-26.9333
92.52	-26.9239
92.62	-26.9387
92.72	-26.9309
92.82	-26.9473
92.92	-26.9434
93.02	-26.9504
93.12	-26.9528
93.22	-26.9528
93.32	-26.963
93.42	-26.9645
93.52	-26.9661
93.62	-26.97
93.72	-26.9614
93.82	-26.9645
93.92	-26.9739
94.02	-26.9825
94.12	-26.9895
94.22	-26.9817
94.32	-26.9903
94.42	-27.0098
94.52	-26.9981
94.62	-27.0067
94.72	-27.0036
94.82	-27.0036
94.92	-27.0036
95.02	-26.9997
95.12	-27.002
95.22	-27.0231
95.32	-27.0106
95.42	-27.0083
95.52	-27.0137
95.62	-27.0301
95.72	-27.0192
95.82	-27.0192
95.92	-27.02
96.02	-27.0364
96.12	-27.0426
96.22	-27.0309
96.32	-27.0309
96.42	-27.0231
96.52	-27.0208
96.62	-27.0231
96.72	-27.0137
96.82	-27.0231
96.92	-27.0247
97.02	-27.0215
97.12	-27.0137
97.22	-27.0145
97.32	-27.0192
97.42	-27.0215
97.52	-27.0215
97.62	-27.0262
97.72	-27.0137
97.82	-27.0247
97.92	-27.0333
98.02	-27.0294
98.12	-27.0231
98.22	-27.0168
98.32	-27.0309
98.42	-27.0309
98.52	-27.0325
98.62	-27.0255
98.72	-27.0215
98.82	-27.0418
98.92	-27.0317
99.02	-27.0348
99.12	-27.0255
99.22	-27.034
99.32	-27.0387
99.42	-27.0434
99.52	-27.034
99.62	-27.0333
99.72	-27.052
99.82	-27.0387
99.92	-27.0426
100.02	-27.0504
100.12	-27.0403
100.22	-27.0372
100.32	-27.0426
100.42	-27.0426
100.52	-27.0387
100.62	-27.0434
100.72	-27.0536
100.82	-27.0504
100.92	-27.0489
101.02	-27.0489
101.12	-27.0676
101.22	-27.0715
101.32	-27.0606
101.42	-27.0809
101.52	-27.0786
101.62	-27.0934
101.72	-27.0817
101.82	-27.0809
101.92	-27.0919
102.02	-27.1012
102.12	-27.1114
102.22	-27.1114
102.32	-27.1067
102.42	-27.1208
102.52	-27.1223
102.62	-27.1231
102.72	-27.1325
102.82	-27.1442
102.92	-27.1465
103.02	-27.1614
103.12	-27.152
103.22	-27.1536
103.32	-27.1684
103.42	-27.1637
103.52	-27.1653
103.62	-27.1575
103.72	-27.1489
103.82	-27.1458
103.92	-27.152
104.02	-27.1403
104.12	-27.1403
104.22	-27.1426
104.32	-27.1614
104.42	-27.1653
104.52	-27.1801
104.62	-27.1833
104.72	-27.1965
104.82	-27.2184
104.92	-27.2301
105.02	-27.2442
105.12	-27.2668
105.22	-27.2809
105.32	-27.2887
105.42	-27.3004
105.52	-27.3106
105.62	-27.32
105.72	-27.3317
105.82	-27.334
105.92	-27.3622
106.02	-27.3692
106.12	-27.3903
106.22	-27.4122
106.32	-27.4387
106.42	-27.4411
106.52	-27.4528
106.62	-27.4606
106.72	-27.484
106.82	-27.4801
106.92	-27.4997
107.02	-27.4895
107.12	-27.4606
107.22	-27.4903
107.32	-27.4918
107.42	-27.4942
107.52	-27.5145
107.62	-27.4981
107.72	-27.4919
107.82	-27.4918
107.92	-27.5137
108.02	-27.5114
108.12	-27.5036
108.22	-27.4919
108.32	-27.4723
108.42	-27.4817
108.52	-27.4411
108.62	-27.4512
108.72	-27.4426
108.82	-27.4215
108.92	-27.4231
109.02	-27.4192
109.12	-27.3989
109.22	-27.4254
109.32	-27.4129
109.42	-27.4098
109.52	-27.4223
109.62	-27.4309
109.72	-27.42
109.82	-27.4137
109.92	-27.3958
110.02	-27.4098
110.12	-27.3926
110.22	-27.3934
110.32	-27.4083
110.42	-27.3942
110.52	-27.3825
110.62	-27.3512
110.72	-27.3512
110.82	-27.3629
110.92	-27.3395
111.02	-27.3372
111.12	-27.3208
111.22	-27.3231
111.32	-27.3403
111.42	-27.3528
111.52	-27.3434
111.62	-27.3411
111.72	-27.3419
111.82	-27.3692
111.92	-27.3645
112.02	-27.3528
112.12	-27.3809
112.22	-27.3801
112.32	-27.3794
112.42	-27.3934
112.52	-27.4098
112.62	-27.4223
112.72	-27.4426
112.82	-27.4426
112.92	-27.4606
113.02	-27.4708
113.12	-27.4669
113.22	-27.4754
113.32	-27.4528
113.42	-27.4583
113.52	-27.4497
113.62	-27.4528
113.72	-27.4598
113.82	-27.4614
113.92	-27.4528
114.02	-27.4723
114.12	-27.484
114.22	-27.484
114.32	-27.4918
114.42	-27.502
114.52	-27.4958
114.62	-27.5028
114.72	-27.4997
114.82	-27.502
114.92	-27.4817
115.02	-27.4747
115.12	-27.4918
115.22	-27.4911
115.32	-27.5075
115.42	-27.5294
115.52	-27.5192
115.62	-27.5286
115.72	-27.5294
115.82	-27.5333
115.92	-27.5622
116.02	-27.5715
116.12	-27.5606
116.22	-27.5622
116.32	-27.5536
116.42	-27.57
116.52	-27.5895
116.62	-27.5903
116.72	-27.6028
116.82	-27.6231
116.92	-27.634
117.02	-27.6223
117.12	-27.6403
117.22	-27.6504
117.32	-27.652
117.42	-27.6379
117.52	-27.6426
117.62	-27.6418
117.72	-27.6348
117.82	-27.6442
117.92	-27.652
118.02	-27.652
118.12	-27.6481
118.22	-27.6458
118.32	-27.6715
118.42	-27.6583
118.52	-27.652
118.62	-27.6825
118.72	-27.6973
118.82	-27.6715
118.92	-27.6887
119.02	-27.7208
119.12	-27.713
119.22	-27.7317
119.32	-27.7403
119.42	-27.734
119.52	-27.8278
119.62	-29.1534
119.72	-30.7732
119.82	-31.7566
119.92	-31.927
120.02	-29.8567
120.12	-23.4812
120.22	-18.7095
120.32	-18.8137
120.42	-19.3528
120.52	-19.8567
120.62	-20.1676
120.72	-20.1083
120.82	-20.3012
120.92	-20.1669
121.02	-20.0551
121.12	-19.8997
121.22	-19.72
121.32	-19.4637
121.42	-19.213
121.52	-18.8684
121.62	-18.5544
121.72	-18.1247
121.82	-17.8278
121.92	-17.5169
122.02	-17.1598
122.12	-16.8075
122.22	-16.3637
122.32	-15.913
122.42	-15.4981
122.52	-15.1262
122.62	-14.8192
122.72	-14.4965
122.82	-14.1395
122.92	-13.7989
123.02	-13.5004
123.12	-13.2684
123.22	-12.9958
123.32	-12.6114
123.42	-12.2676
123.52	-12.0606
123.62	-11.8106
123.72	-11.5762
123.82	-11.2911
123.92	-11.0606
124.02	-10.9176
124.12	-10.6958
124.22	-10.5192
124.32	-10.3653
124.42	-10.1817
124.52	-9.98247
124.62	-9.88092
124.72	-9.76764
124.82	-9.59106
124.92	-9.41606
125.02	-9.26763
125.12	-9.12935
125.22	-8.98169
125.32	-8.87701
125.42	-8.73561
125.52	-8.6489
125.62	-8.52701
125.72	-8.40044
125.82	-8.31216
125.92	-8.21139
126.02	-8.12779
126.12	-8.01764
126.22	-7.93326
126.32	-7.85358
126.42	-7.77936
126.52	-7.70827
126.62	-7.63483
126.72	-7.57623
126.82	-7.51919
126.92	-7.46686
127.02	-7.40357
127.12	-7.31607
127.22	-7.26764
127.32	-7.22389
127.42	-7.15826
127.52	-7.09888
127.62	-7.05513
127.72	-7.04263
127.82	-7.00357
127.92	-6.95514
128.02	-6.91999
128.12	-6.85123
128.22	-6.82779
128.32	-6.77466
128.42	-6.71451
128.52	-6.58873
128.62	-6.53873
128.72	-6.50357
128.82	-6.47076
128.92	-6.41919
129.02	-6.41373
129.12	-6.35513
129.22	-6.33405
129.32	-6.21842
129.42	-5.96297
129.52	-6.03166
129.62	-6.14888
129.72	-6.19107
129.82	-5.6216
129.92	-5.47324
130.02	-6.79015
130.12	-7.32701
130.22	-6.10904
130.32	-6.15359
130.42	-6.09656
130.52	-6.16918
130.62	-6.11374
130.72	-6.1817
130.82	-6.14496
130.92	-5.95514
131.02	-5.92154
131.12	-5.88403
131.22	-5.85513
131.32	-5.84186
131.42	-5.80982
131.52	-5.79889
131.62	-5.75592
131.72	-5.71841
131.82	-5.67545
131.92	-5.63248
132.02	-5.55981
132.12	-5.59186
132.22	-5.55826
132.32	-5.55435
132.42	-5.56296
132.52	-5.55826
132.62	-5.53638
132.72	-5.49966
132.82	-5.47467
132.92	-5.49185
133.02	-5.48715
133.12	-5.42935
133.22	-5.18248
133.32	-4.73875
133.42	-5.99557
133.52	-5.70846
133.62	-5.94888
133.72	-5.50279
133.82	-5.43952
133.92	-5.45516
134.02	-5.43636
134.12	-5.36763
134.22	-5.41528
134.32	-5.45124
134.42	-5.45125
134.52	-5.46058
134.62	-5.36452
134.72	-5.35669
134.82	-5.40514
134.92	-5.43717
135.02	-5.43872
135.12	-5.43951
135.22	-5.41919
135.32	-5.42624
135.42	-5.4231
135.52	-5.42389
135.62	-5.39966
135.72	-5.35278
135.82	-5.32779
135.92	-5.29108
136.02	-5.27075
136.12	-5.23639
136.22	-5.20123
136.32	-5.21216
136.42	-5.20124
136.52	-5.22857
136.62	-5.21686
136.72	-5.20435
136.82	-5.17154
136.92	-5.15357
137.02	-5.14264
137.12	-5.13013
137.22	-5.08795
137.32	-5.06372
137.42	-5.04734
137.52	-5.05591
137.62	-5.04654
137.72	-5.03326
137.82	-5.03092
137.92	-5.01685
138.02	-5.01529
138.12	-5.03091
138.22	-5.0231
138.32	-5.03717
138.42	-5.0489
138.52	-5.05825
138.62	-5.05981
138.72	-5.02701
138.82	-4.9903
138.92	-4.96997
139.02	-4.94888
139.12	-4.92154
139.22	-4.91373
139.32	-4.92545
139.42	-4.9278
139.52	-4.93716
139.62	-4.94498
139.72	-4.94733
[truncated: 17,544 more rows]
